# Supplementary material for: Experimental Evidence Questions the Relationship between Stress and Fluctuating Asymmetry in Plants
Source: MDPI journal article supplement (doi:10.3390/sym15020339), 2023-01-25

01

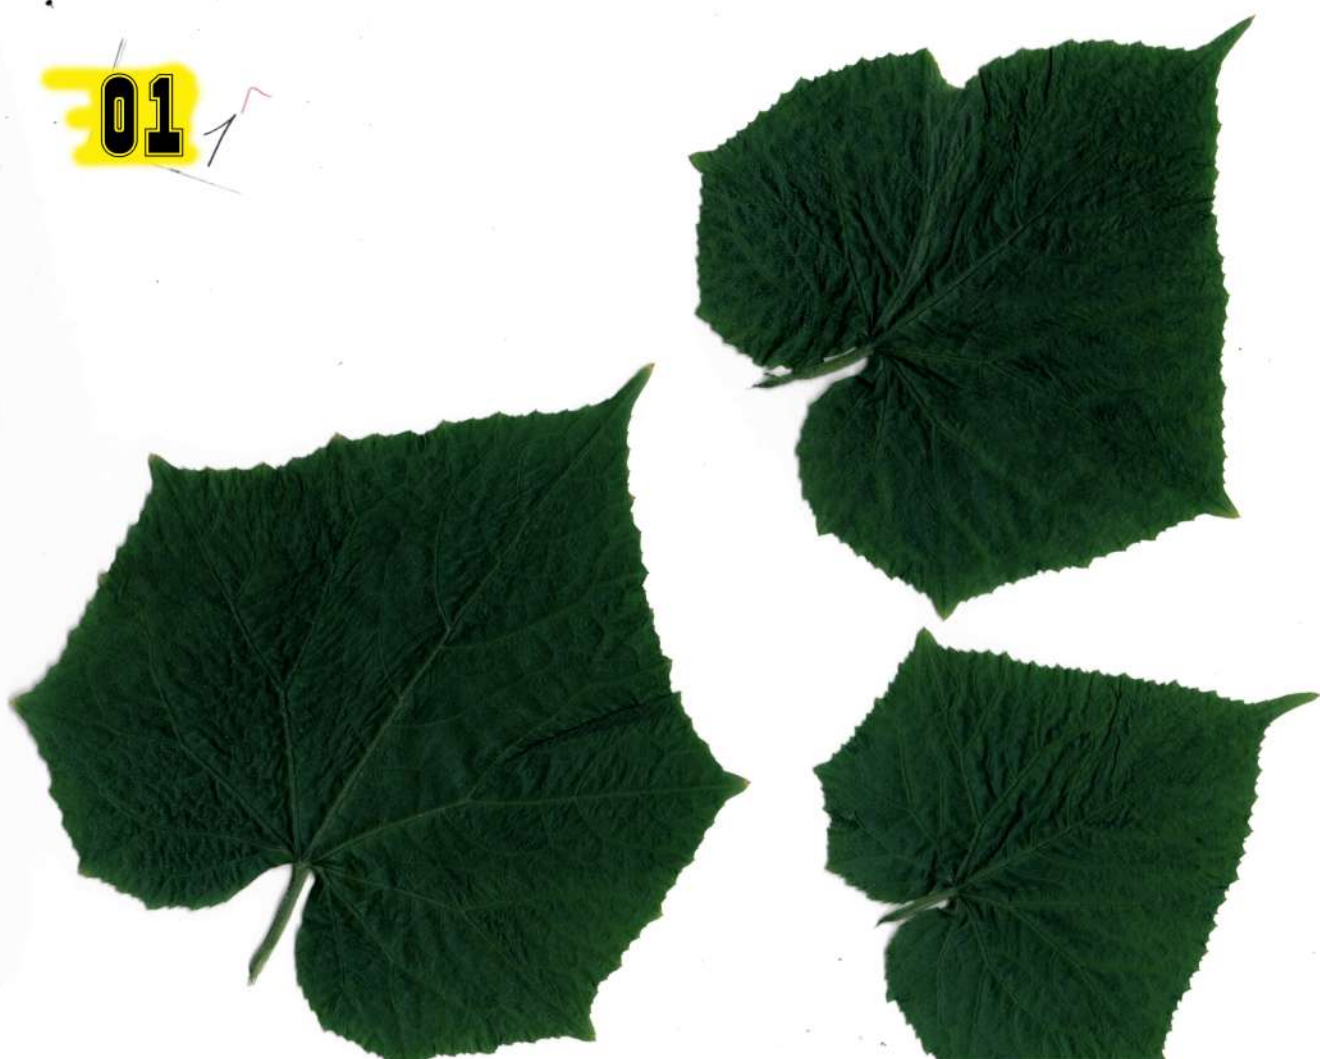

11-1

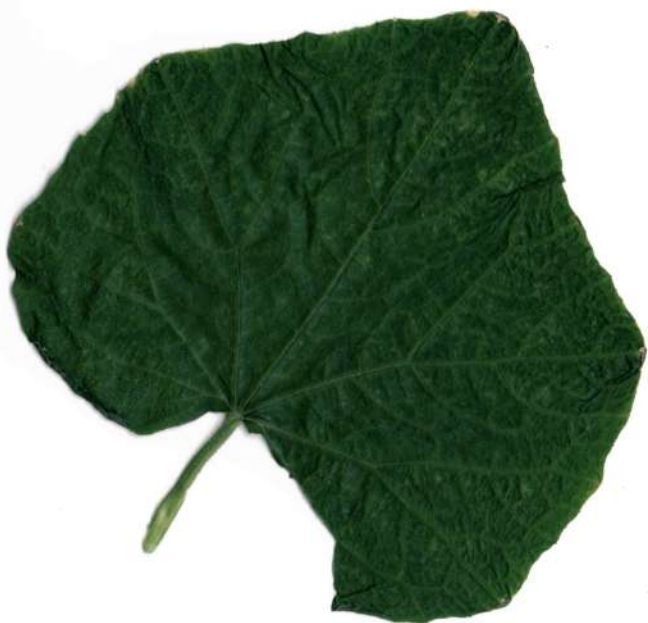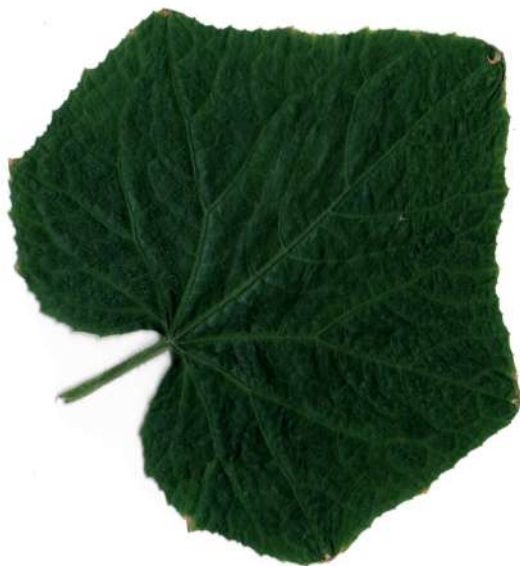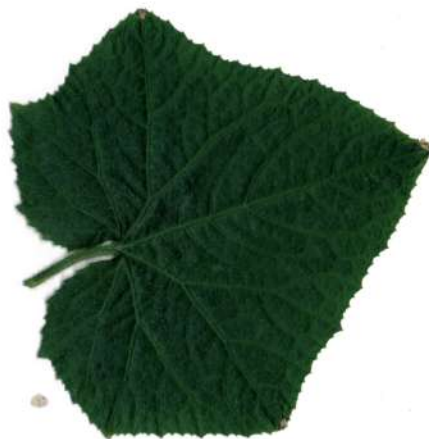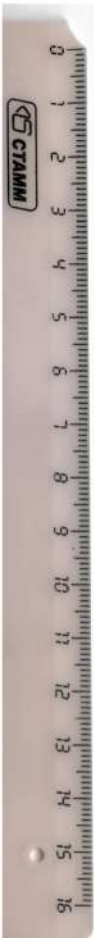

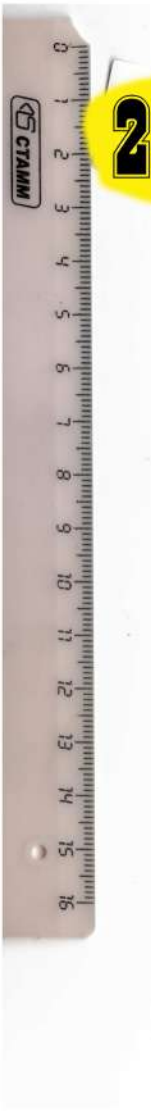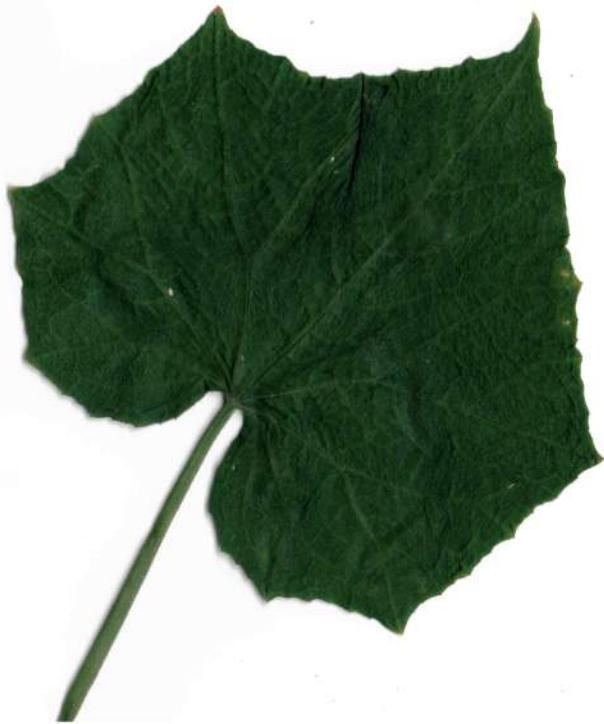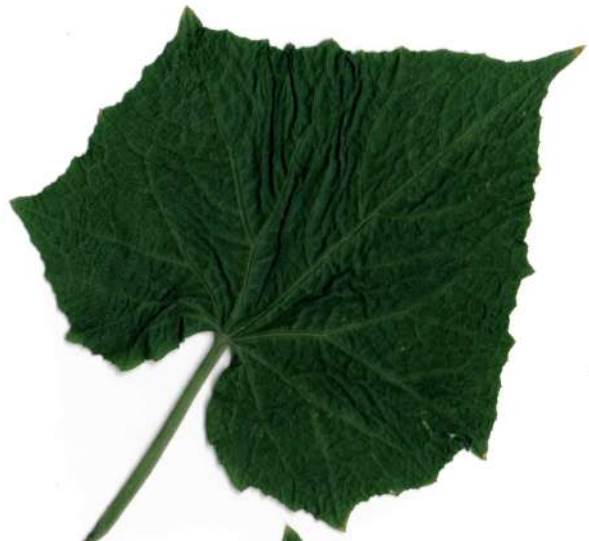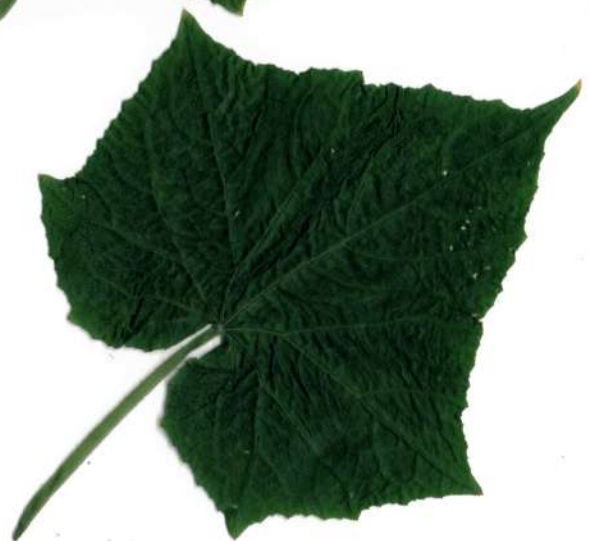

33-1

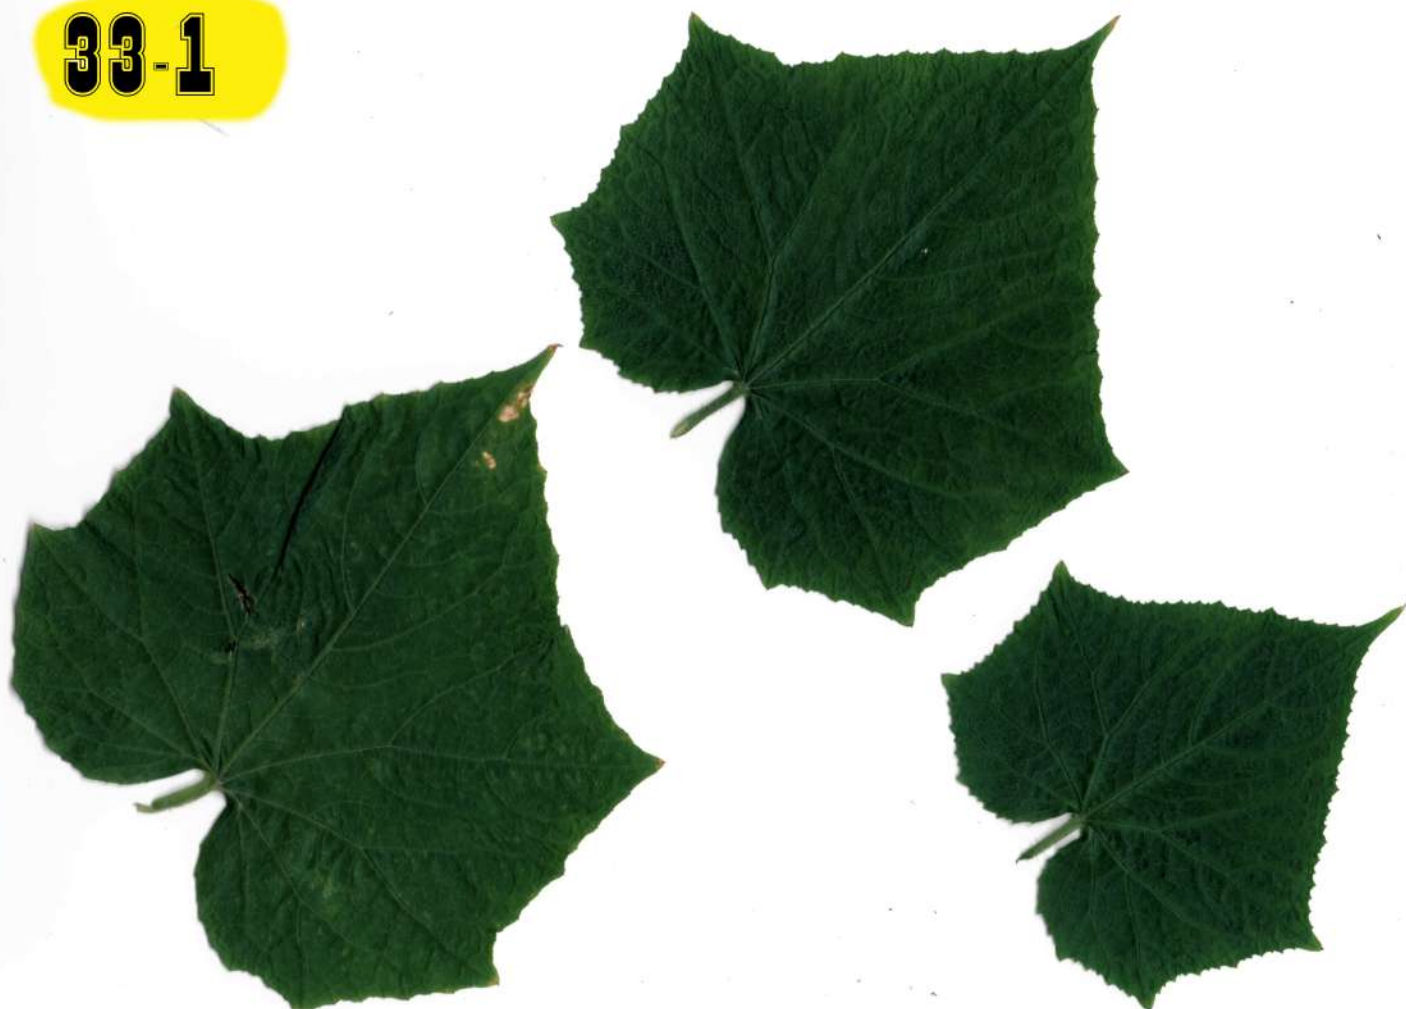



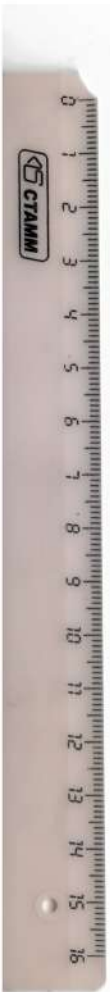

012

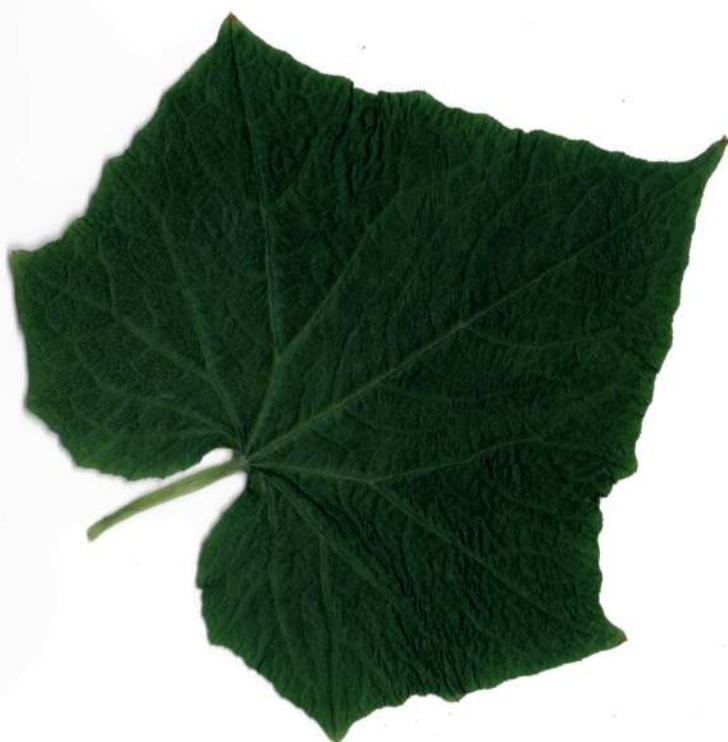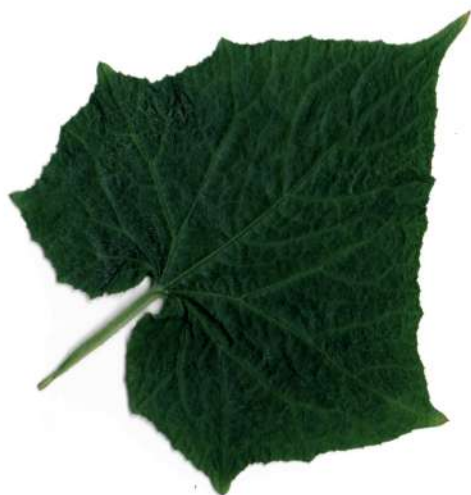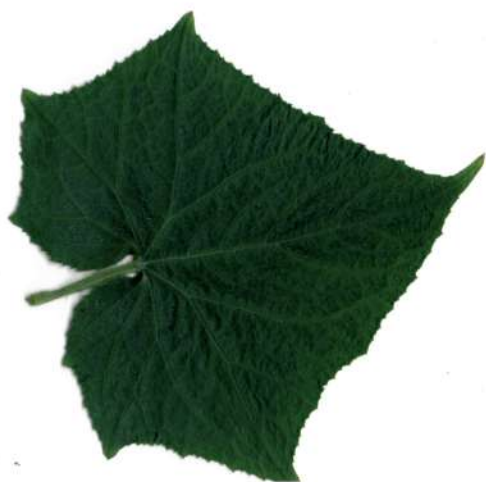

**11-2**

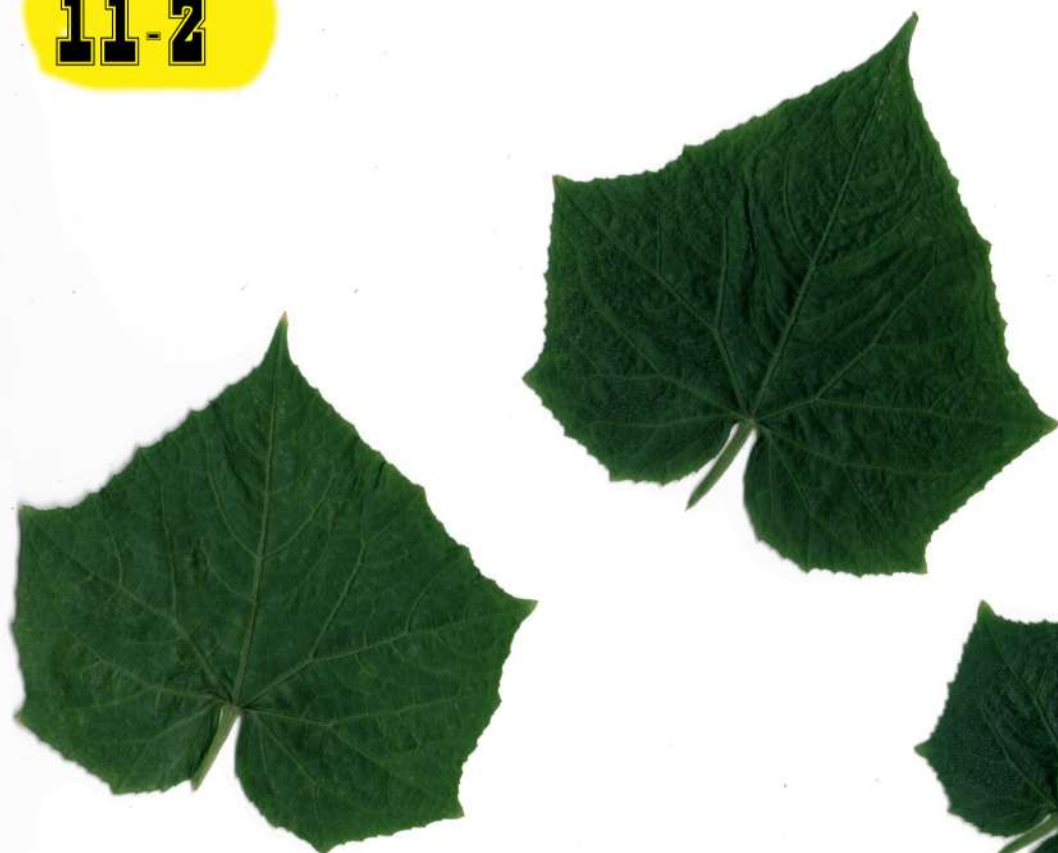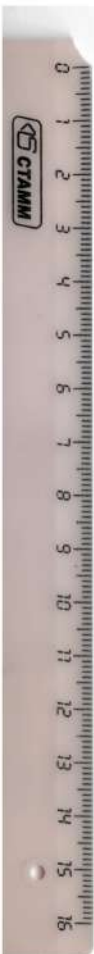

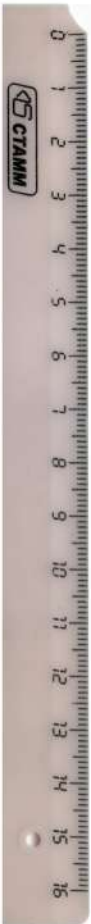

22-2

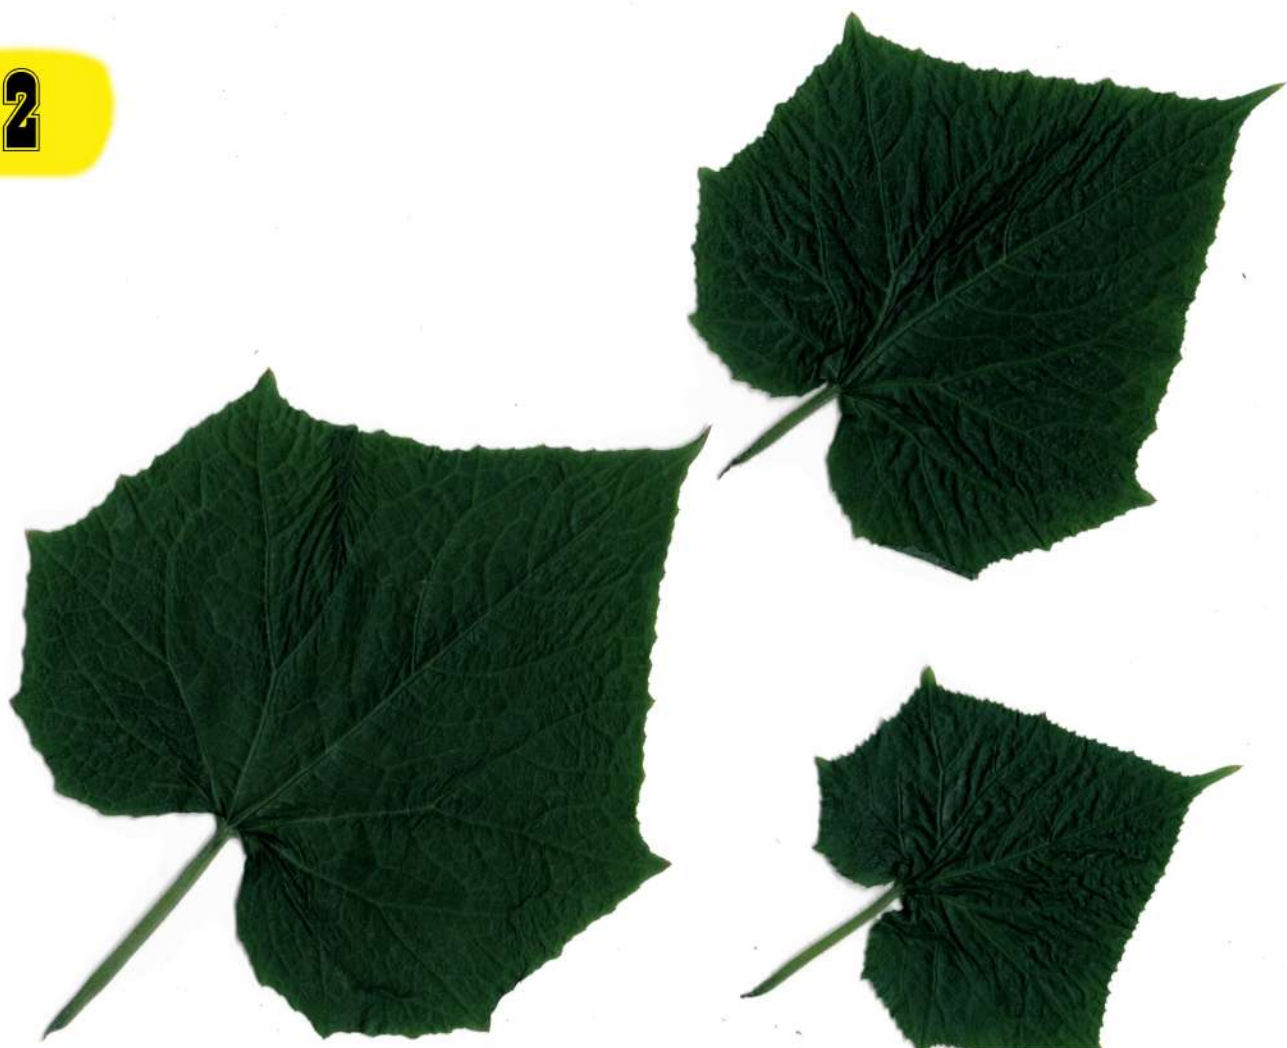

33-2

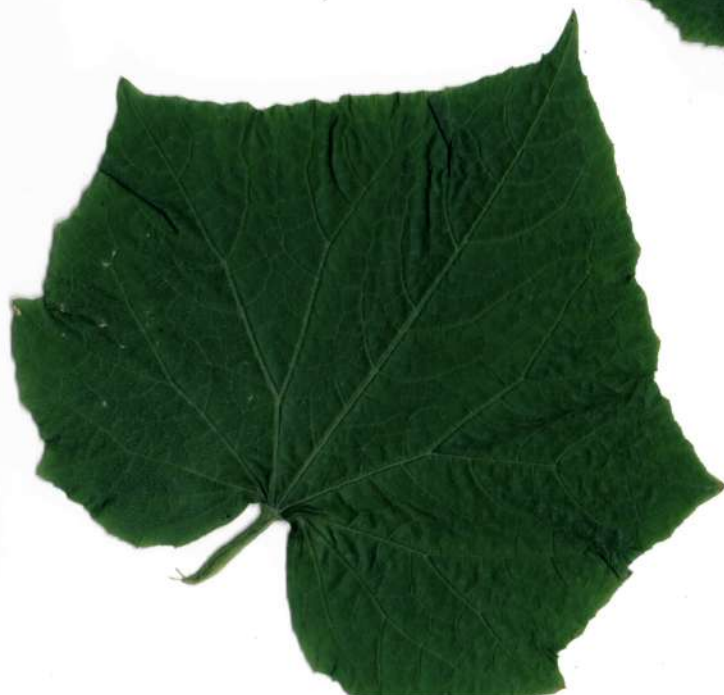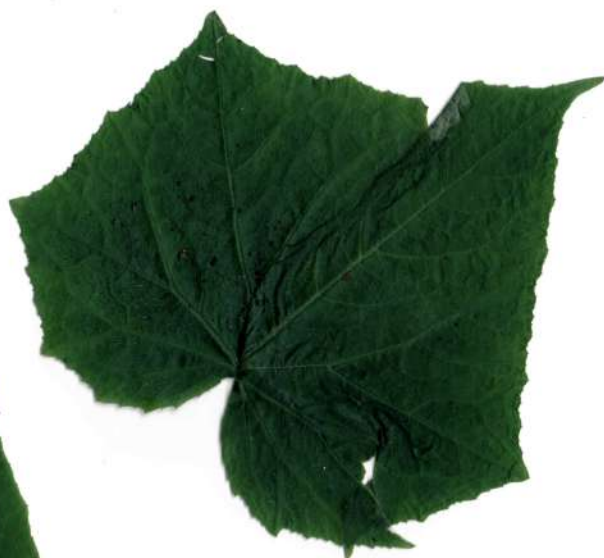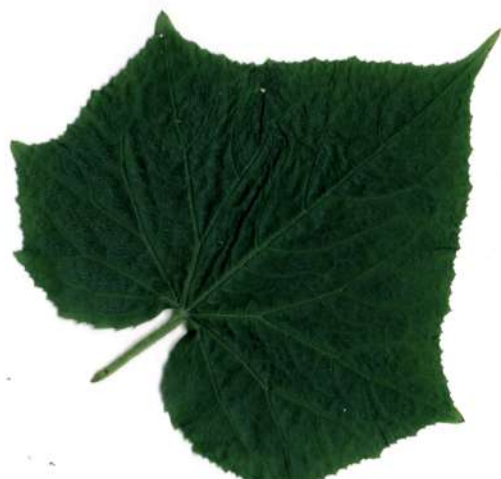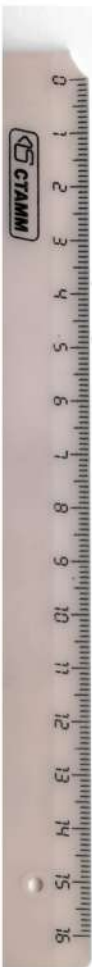



01

3

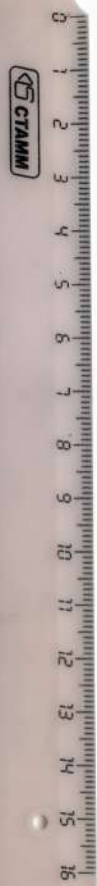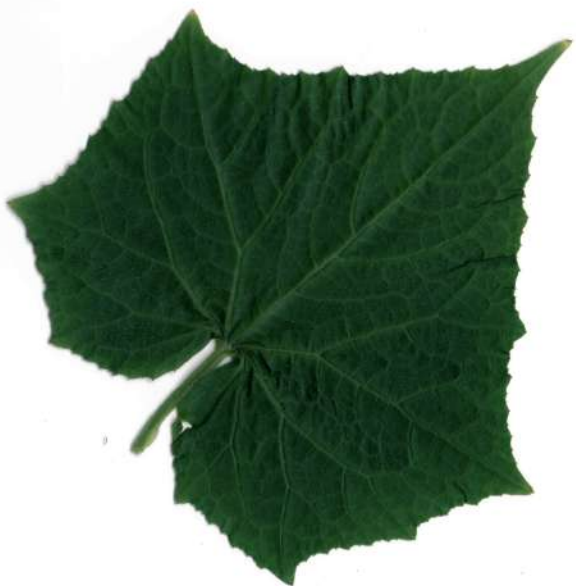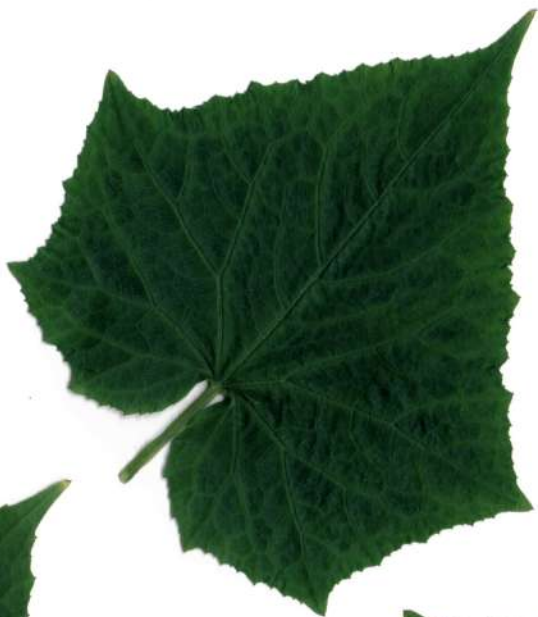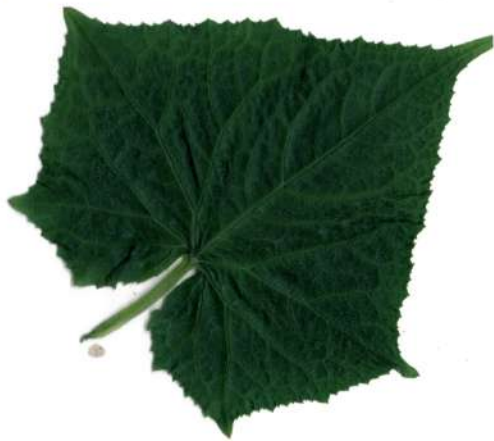

11-3

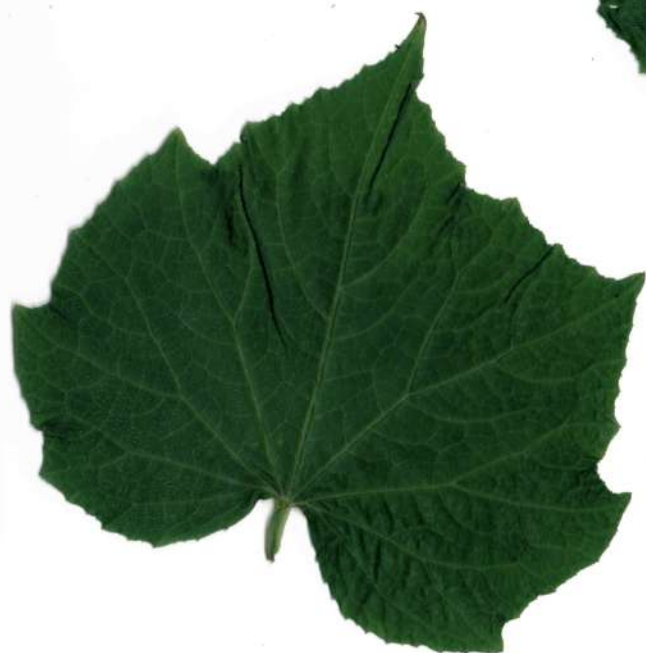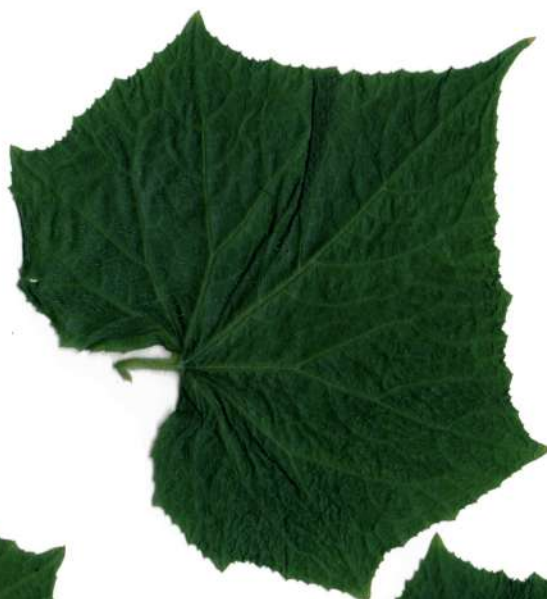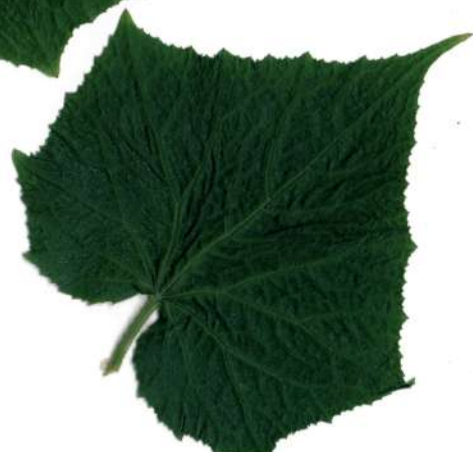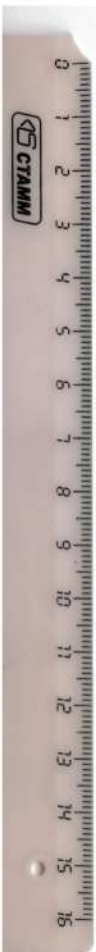

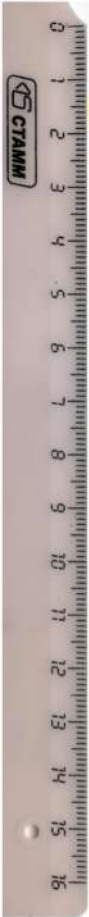

22-3

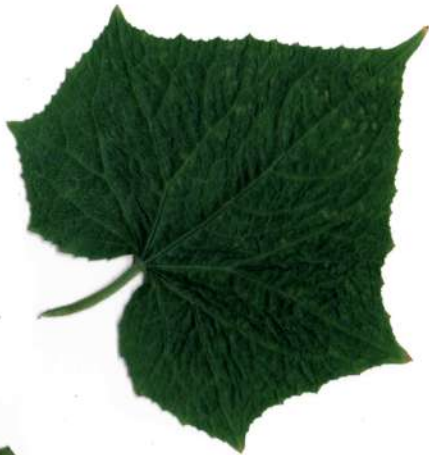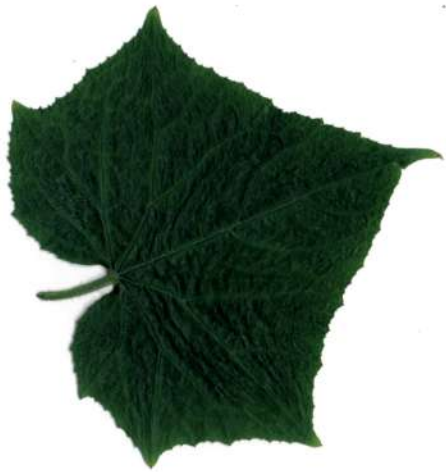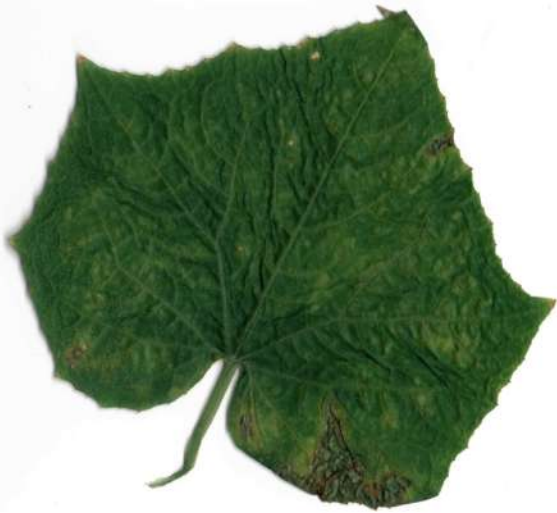

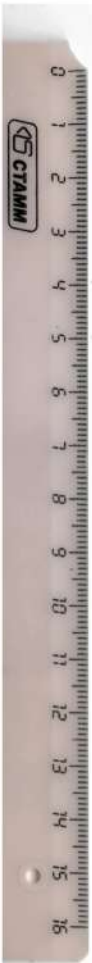

33-3

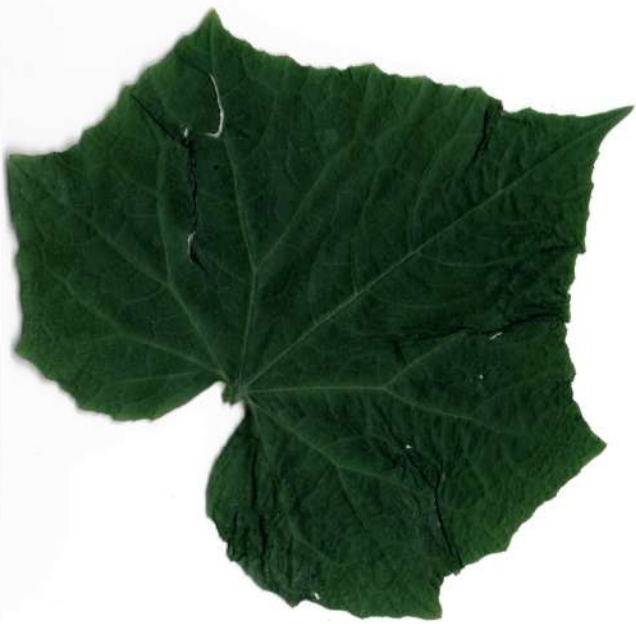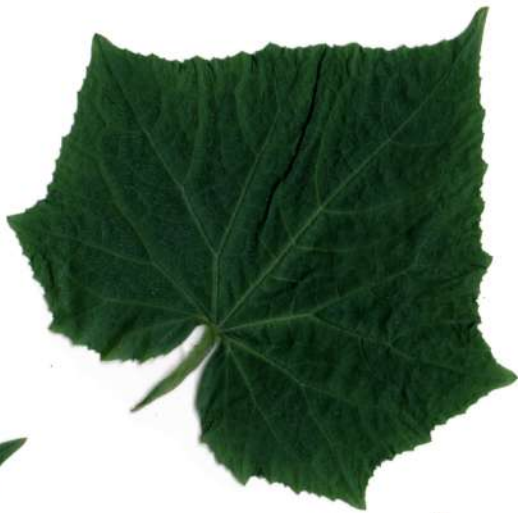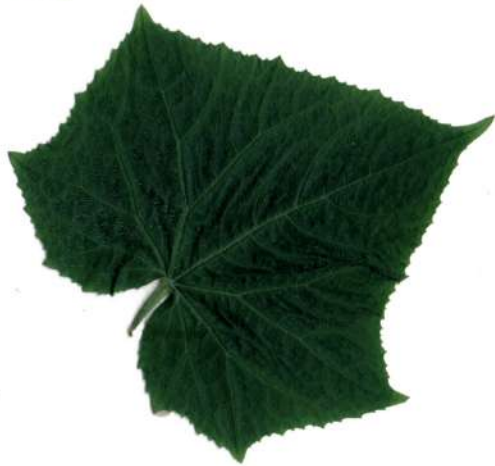



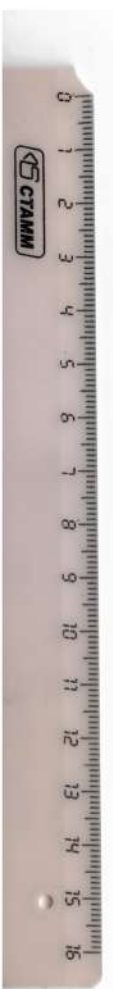

014

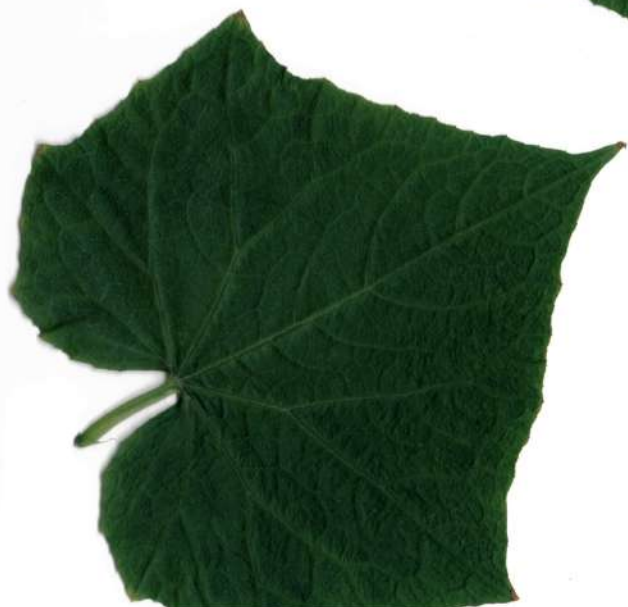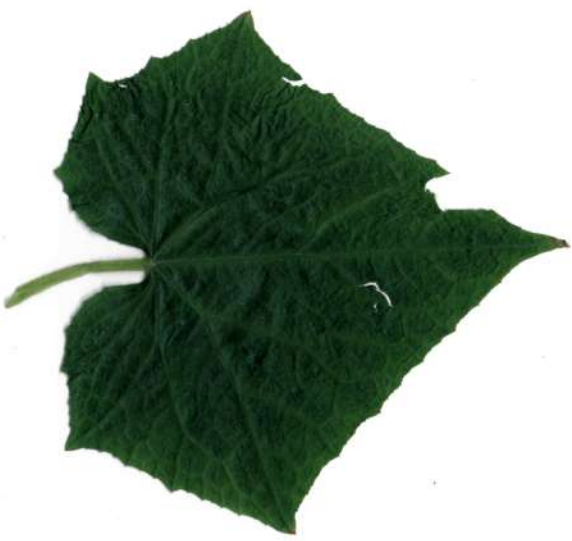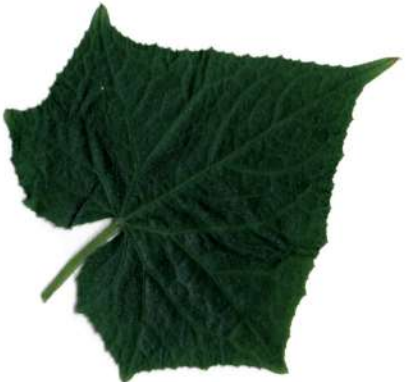

11-4

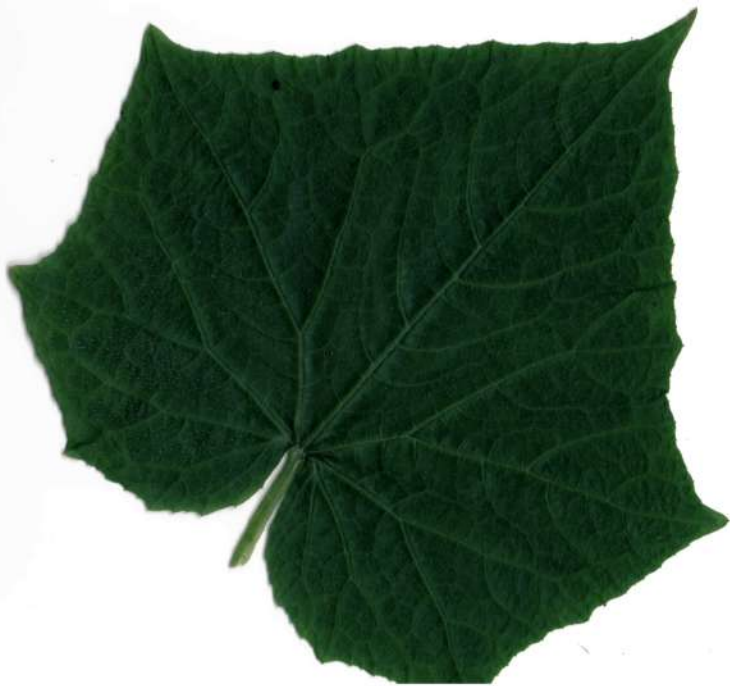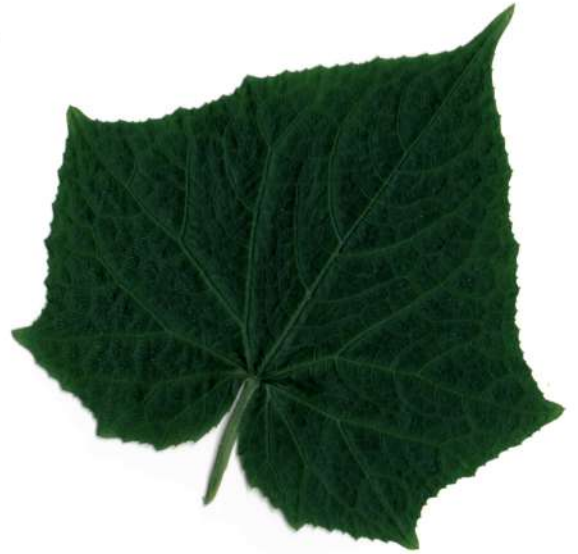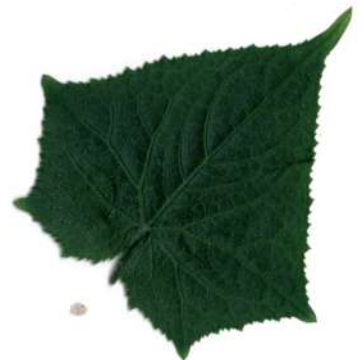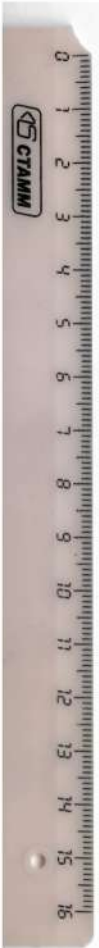

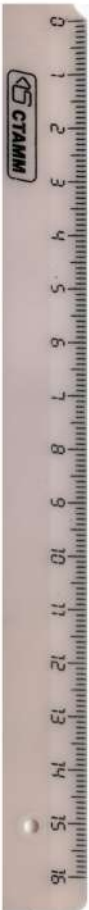

**22-4**

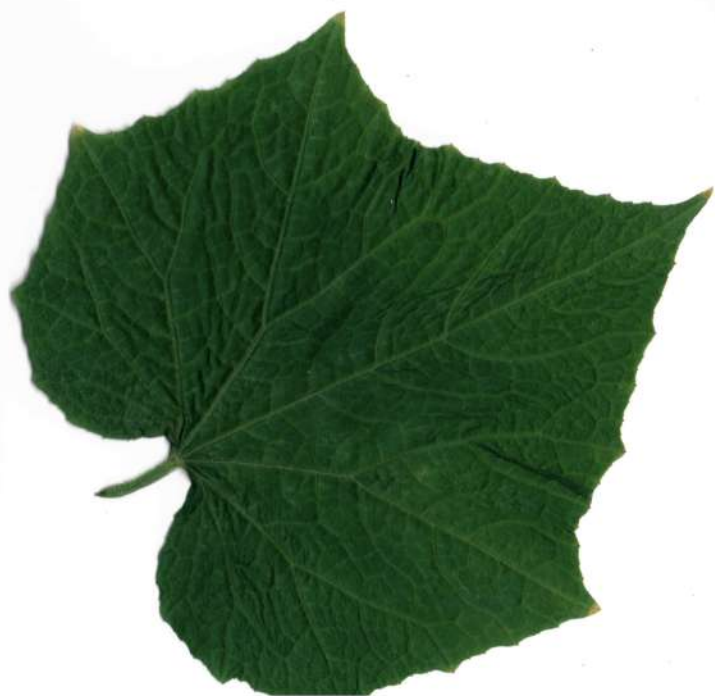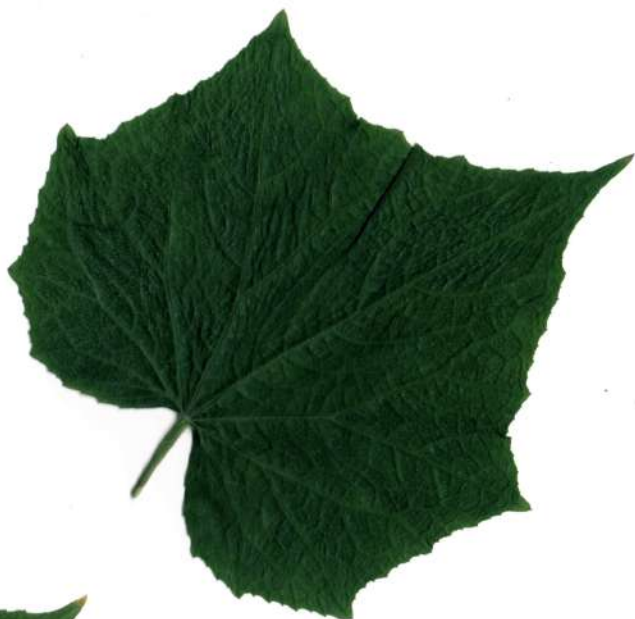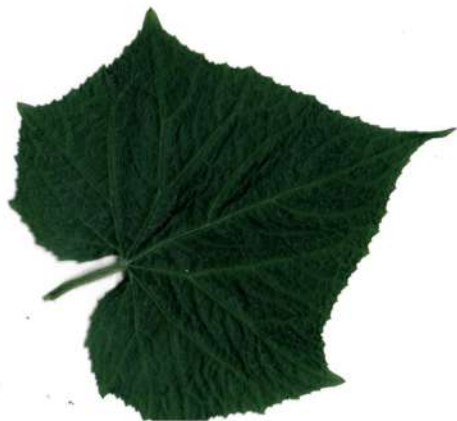

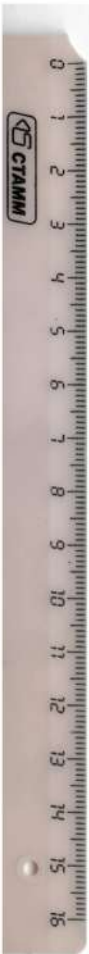

33-4

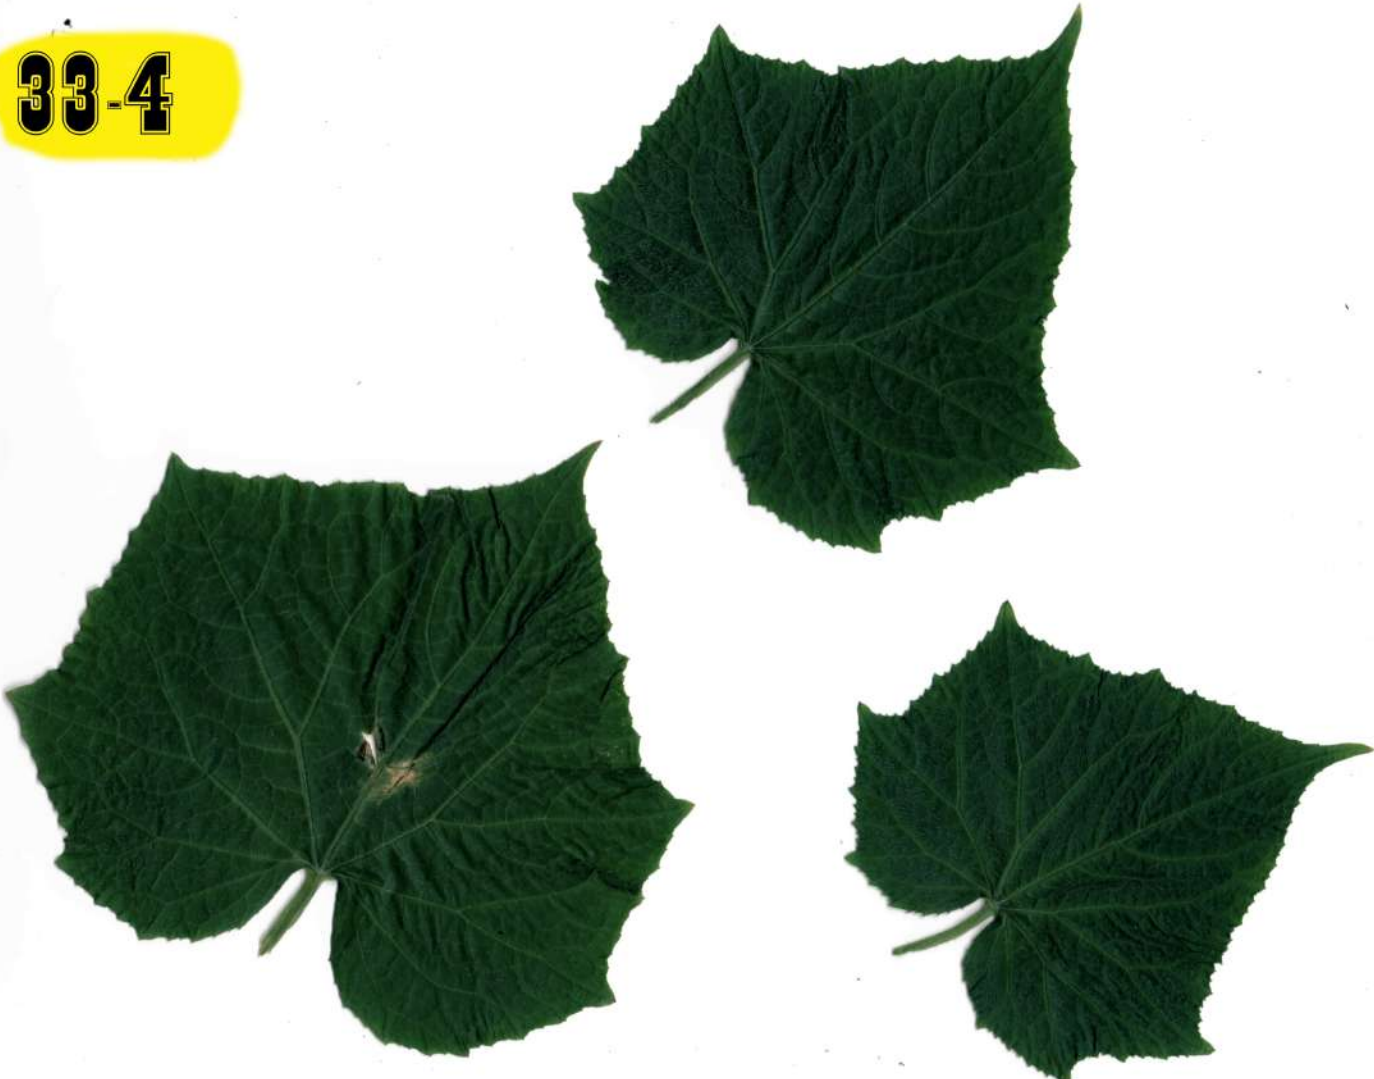



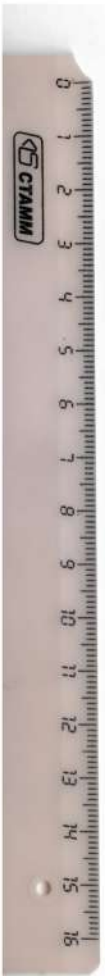

015

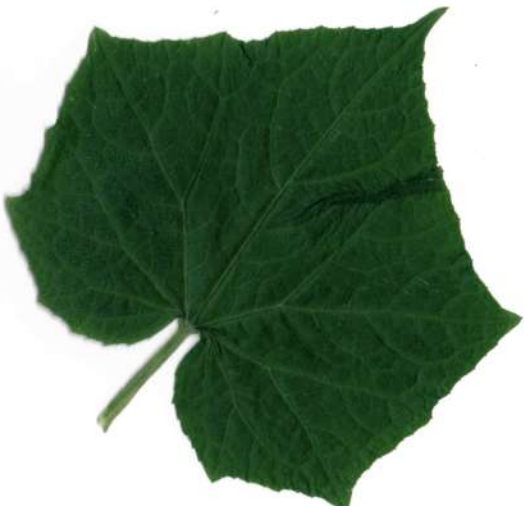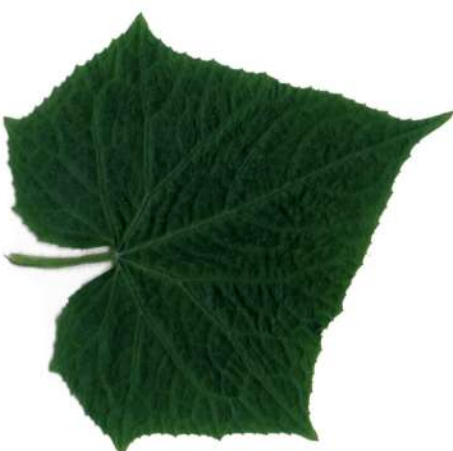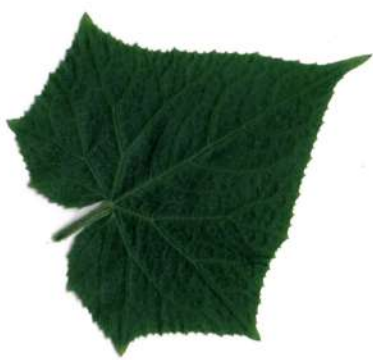

11-5

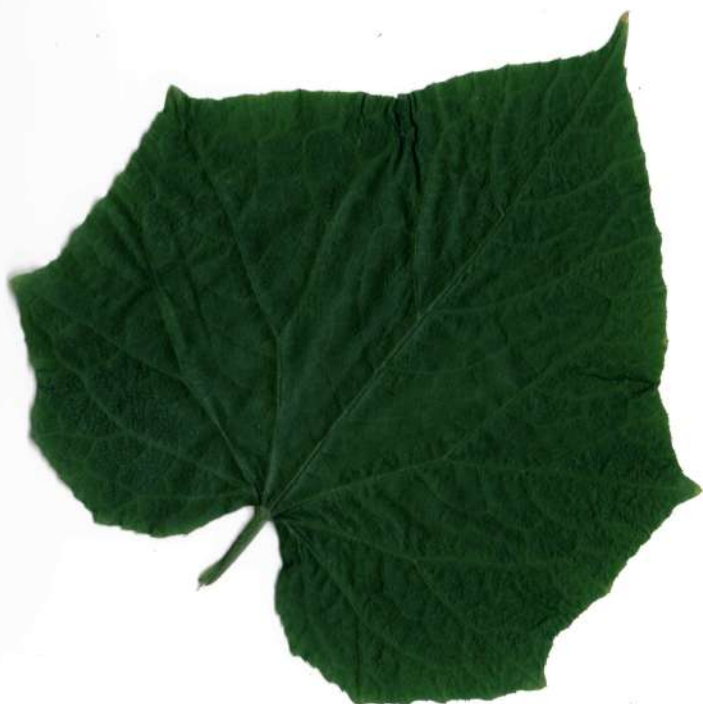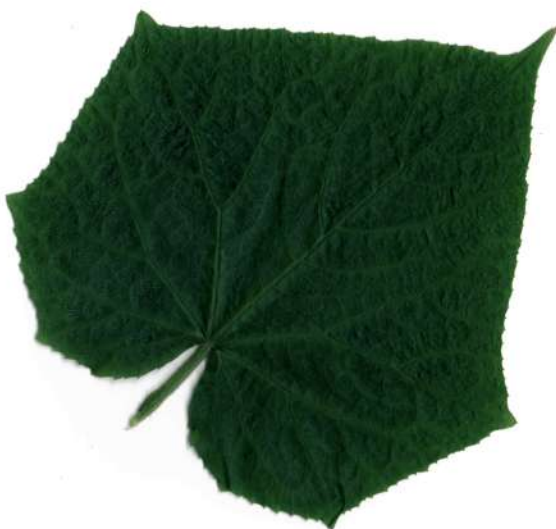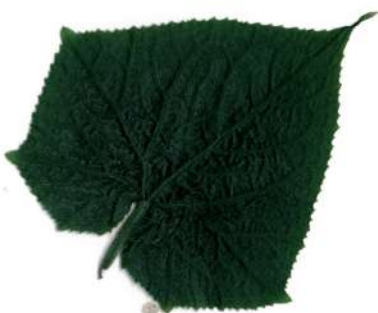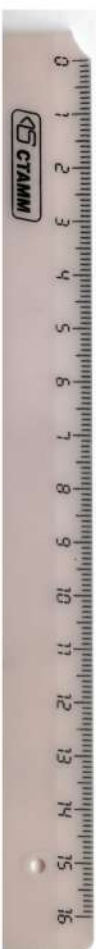

22-5

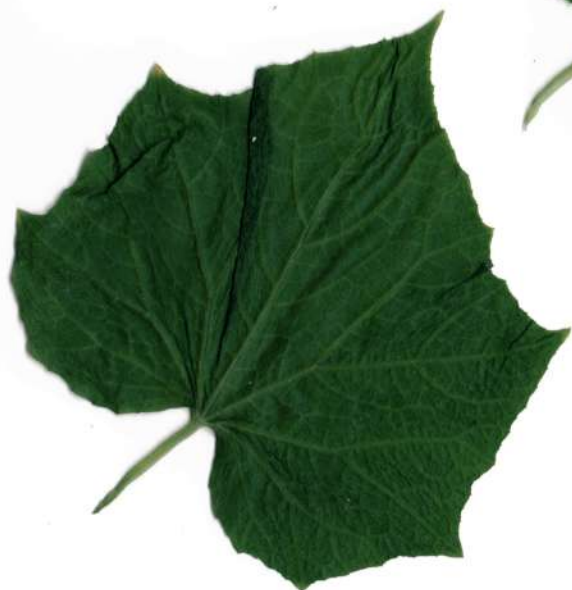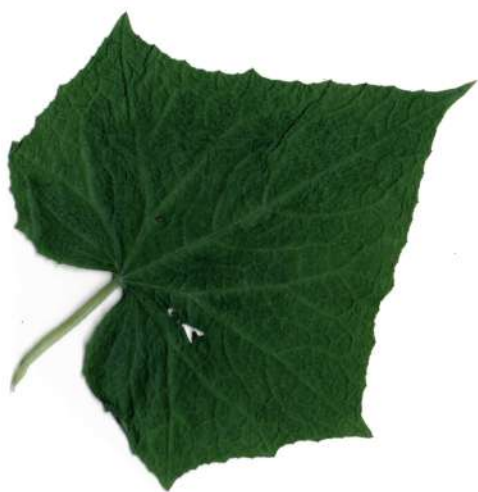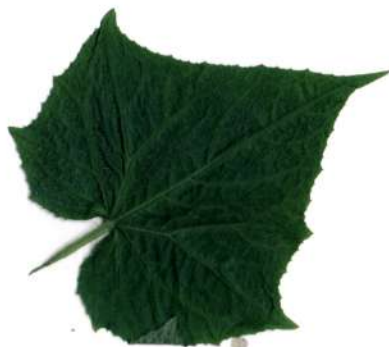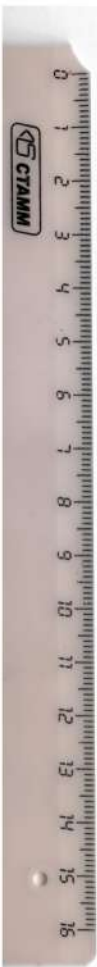

33-5

СТАНД

0 1 2 3 4 5 6 7 8 9 10 11 12 13 14 15 16

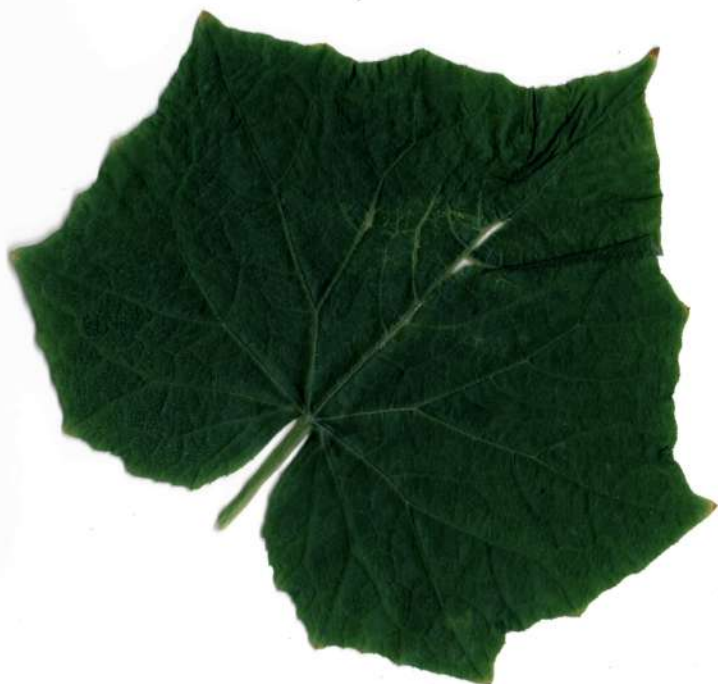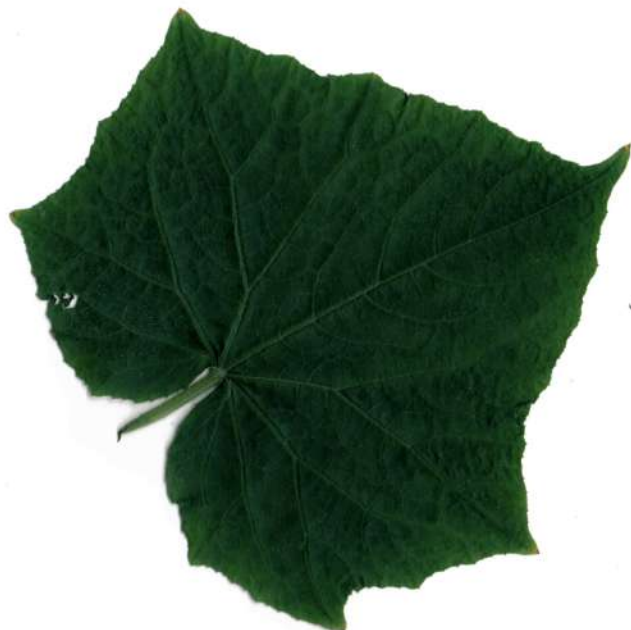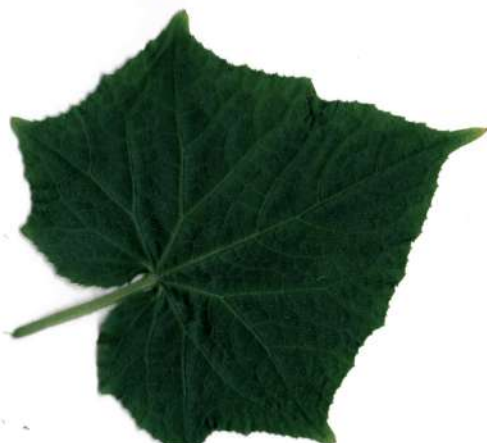



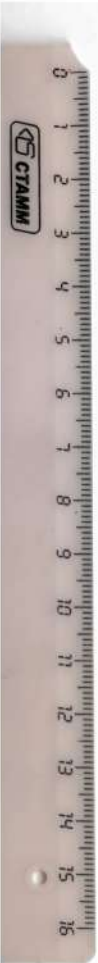

01

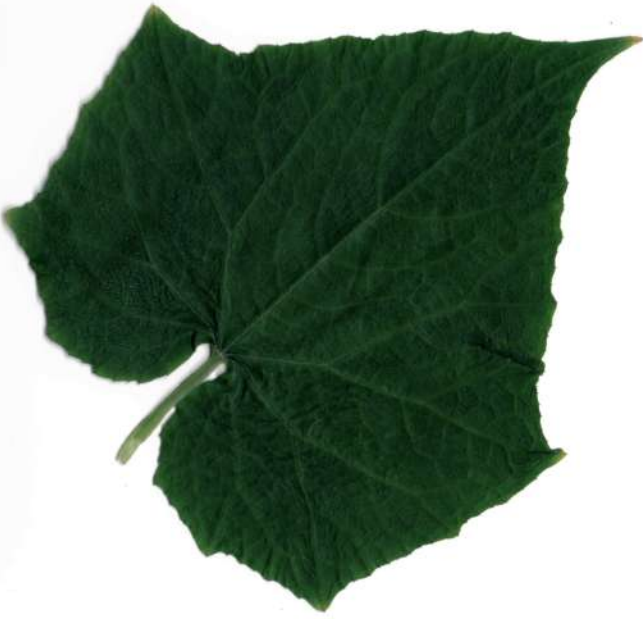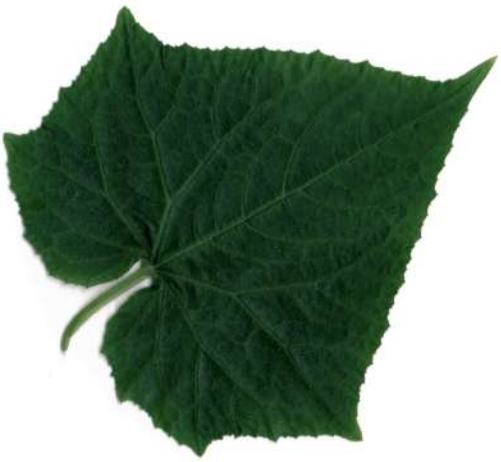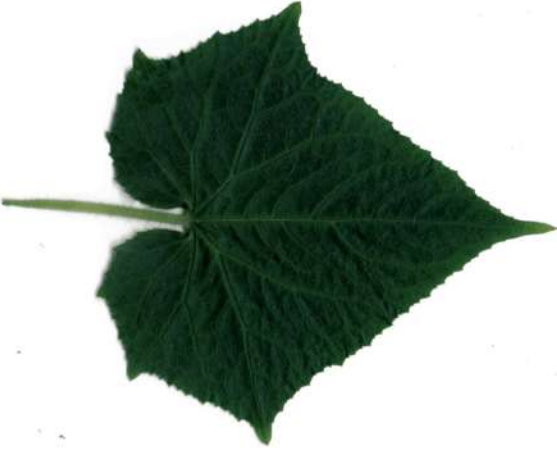

11-6

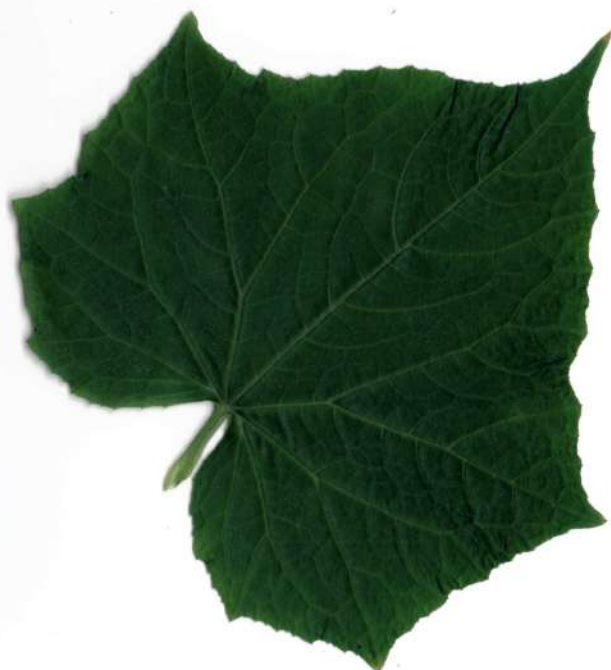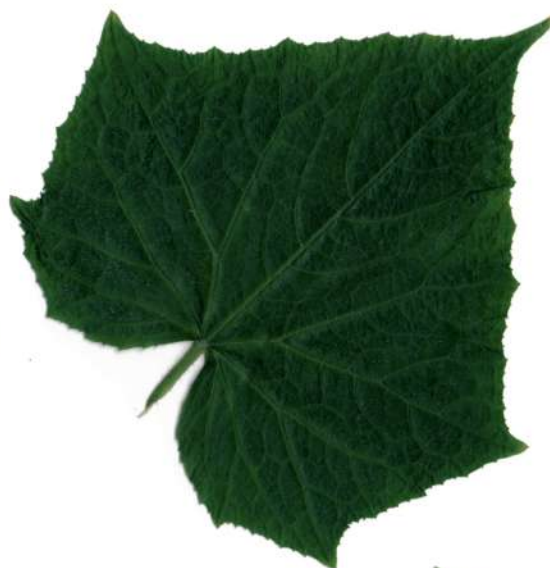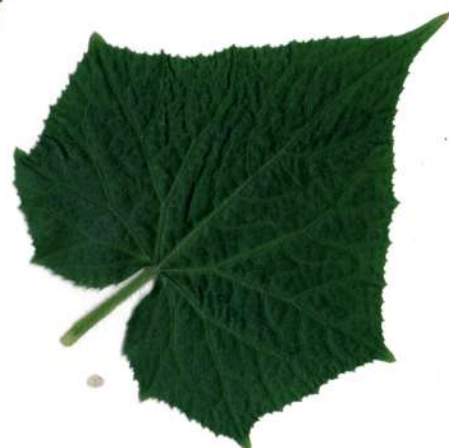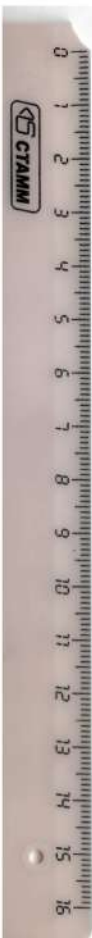

22-6

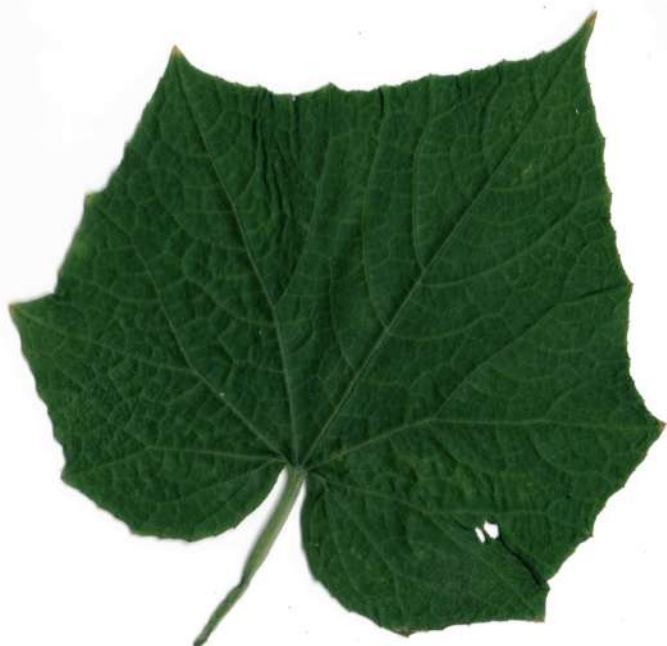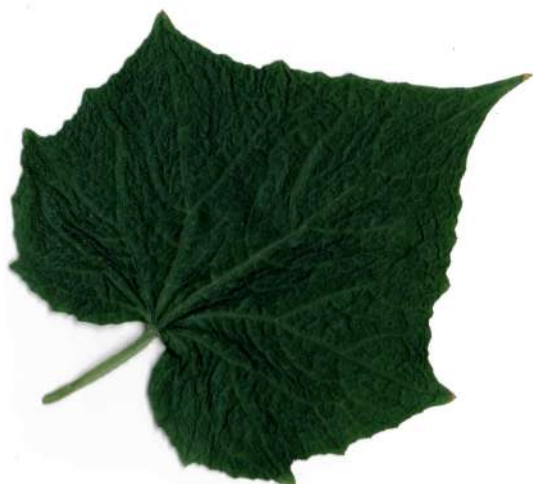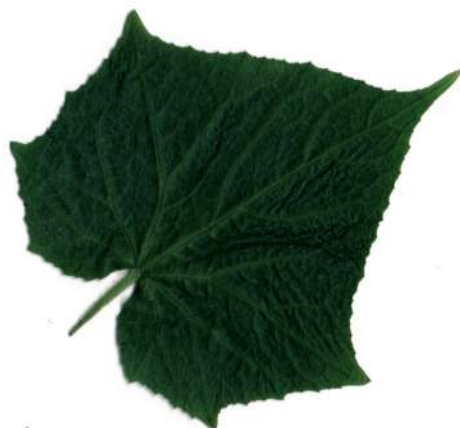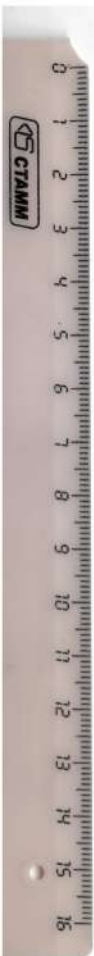

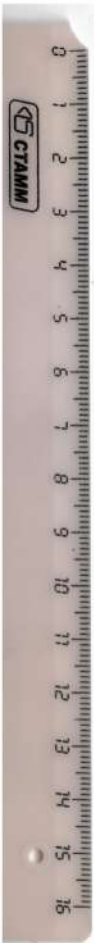

33-6

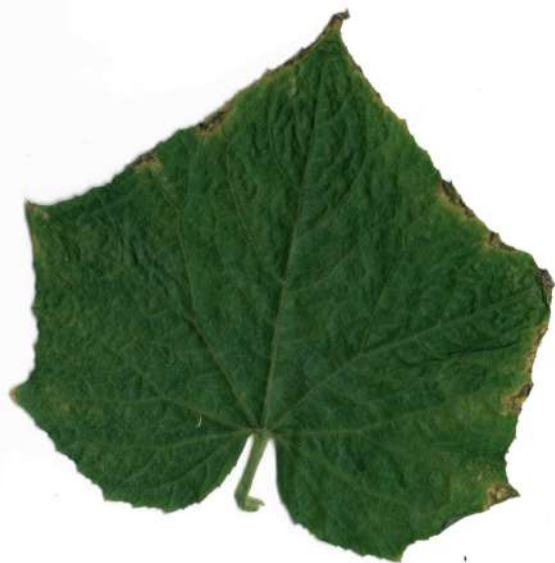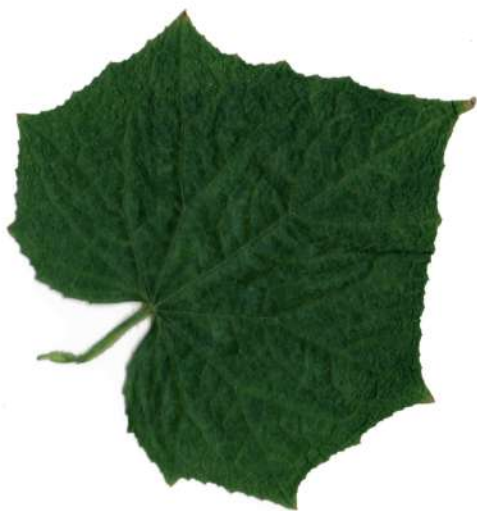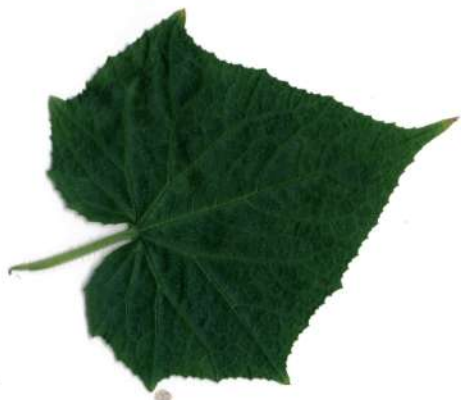



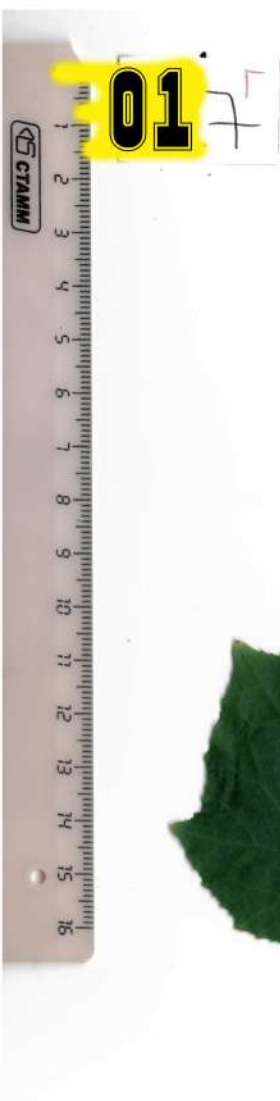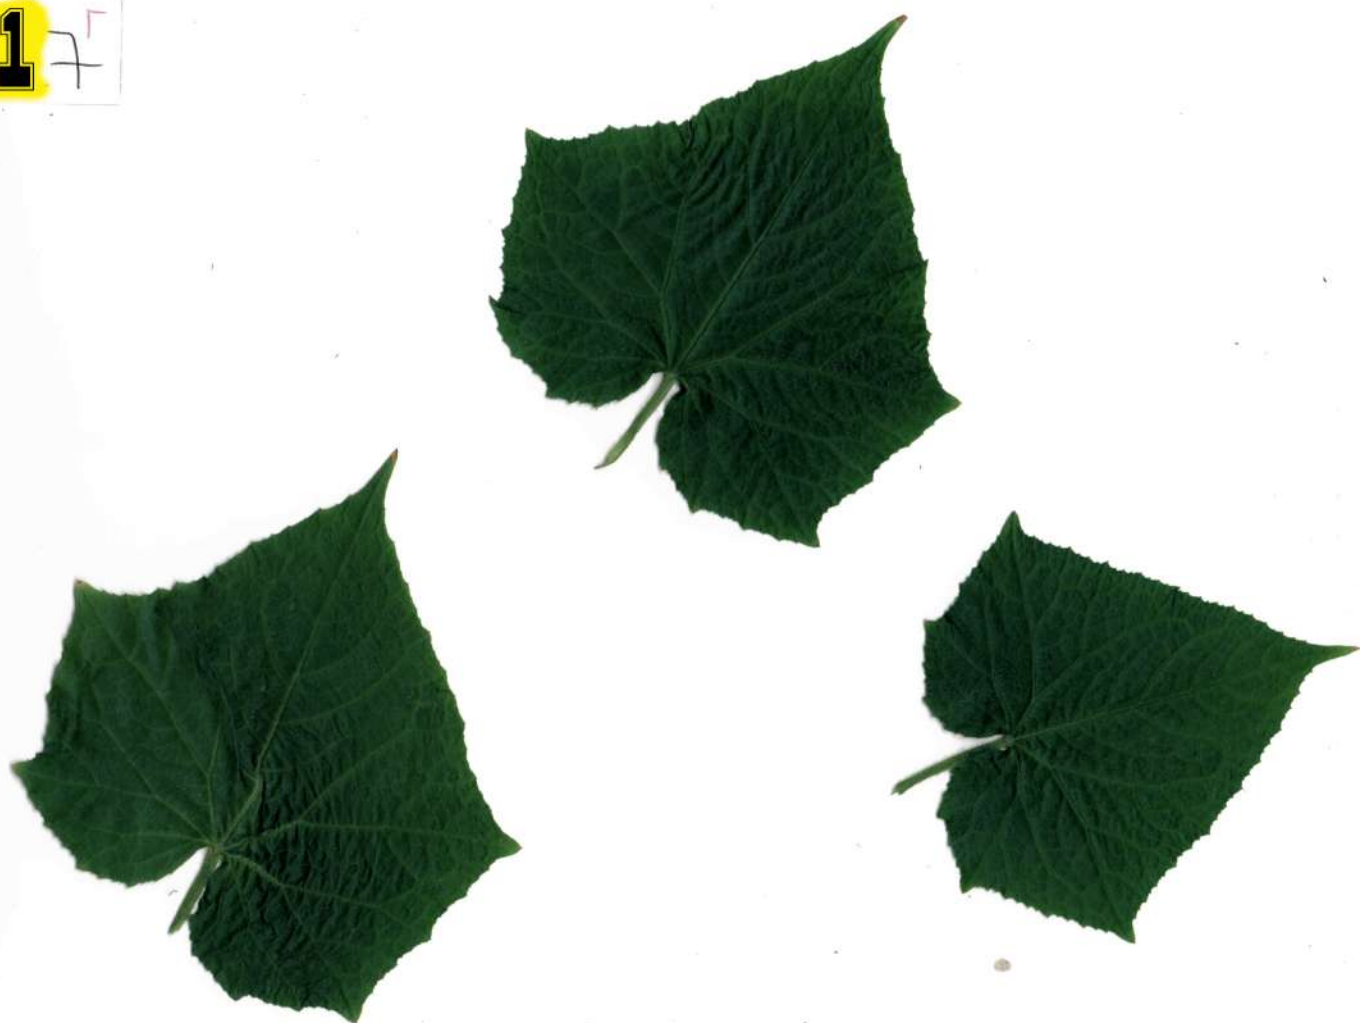

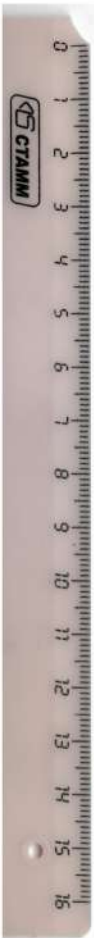

**11-7**

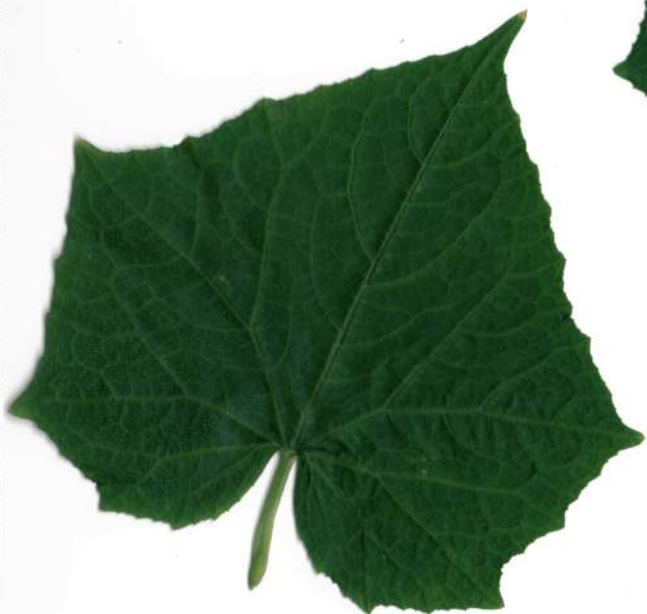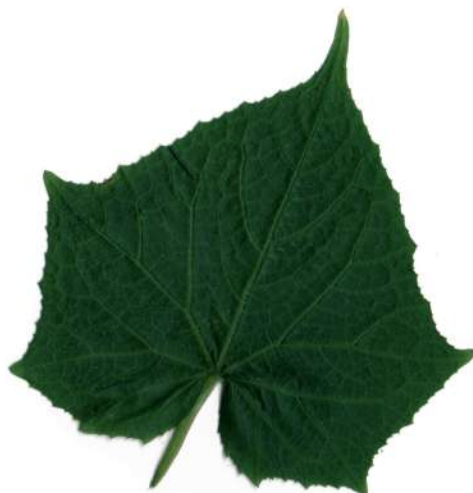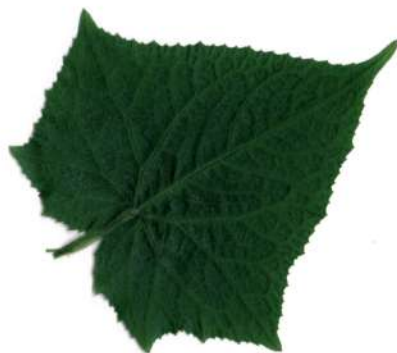

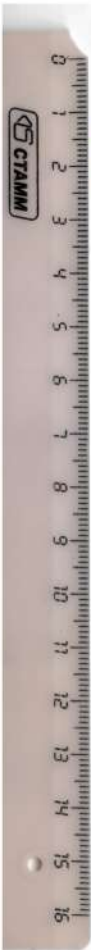

**22-7**

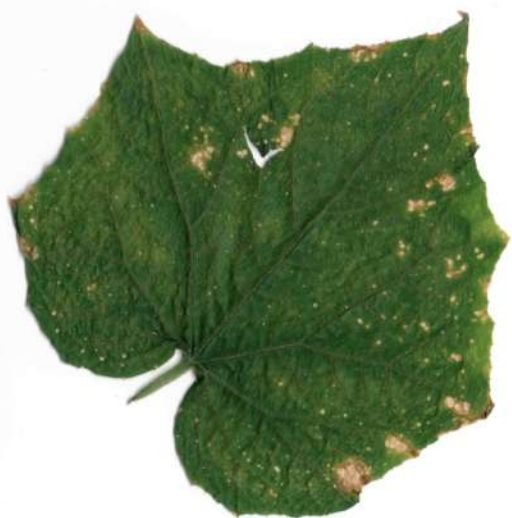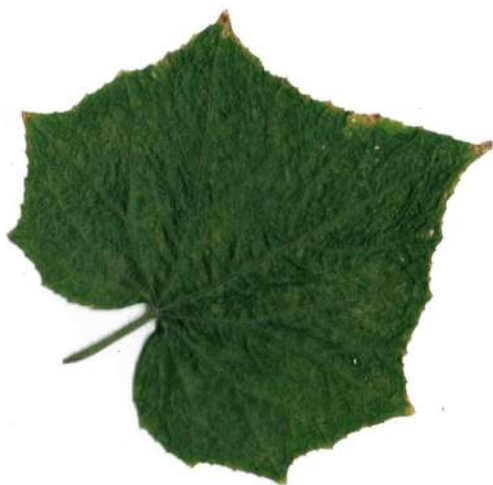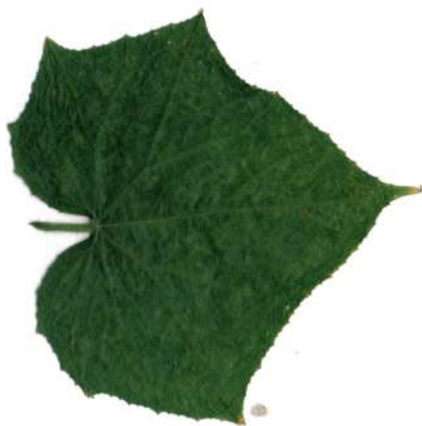

33-7

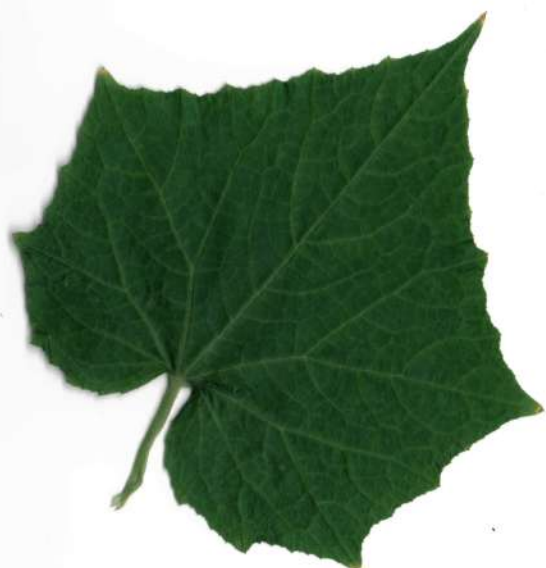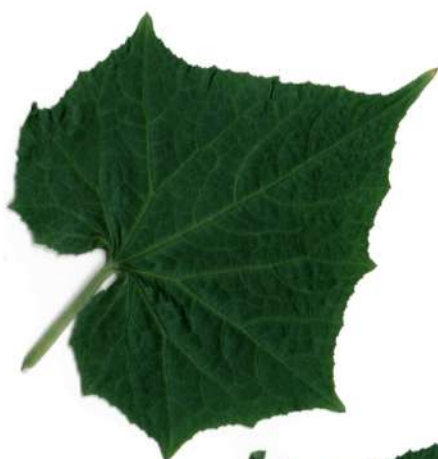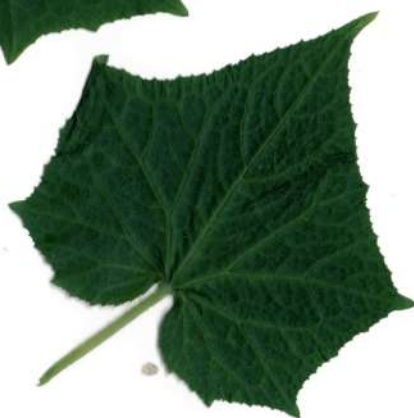



01

8

СТАНДАРТ

0 1 2 3 4 5 6 7 8 9 10 11 12 13 14 15 16

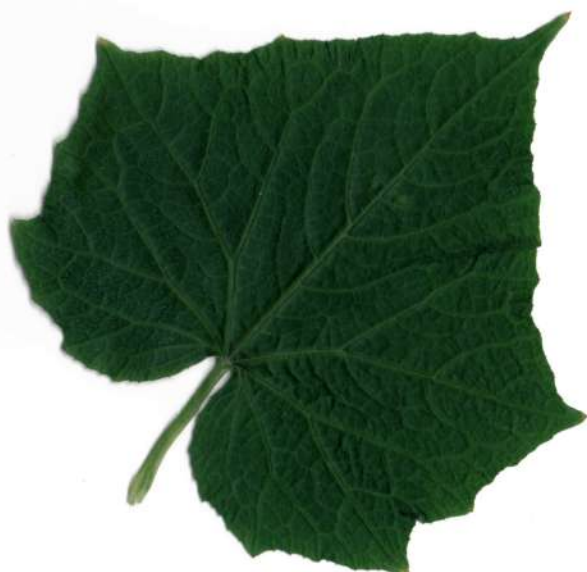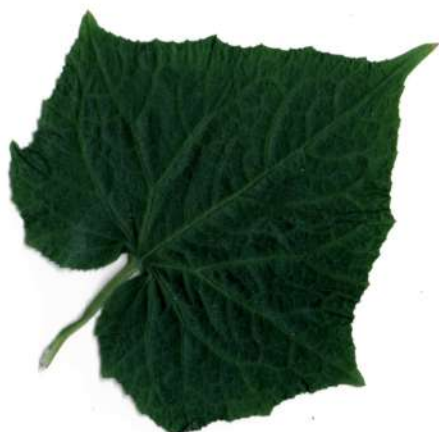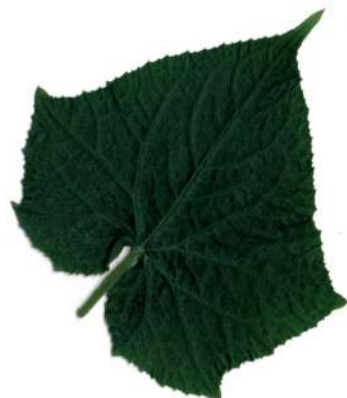

11-8

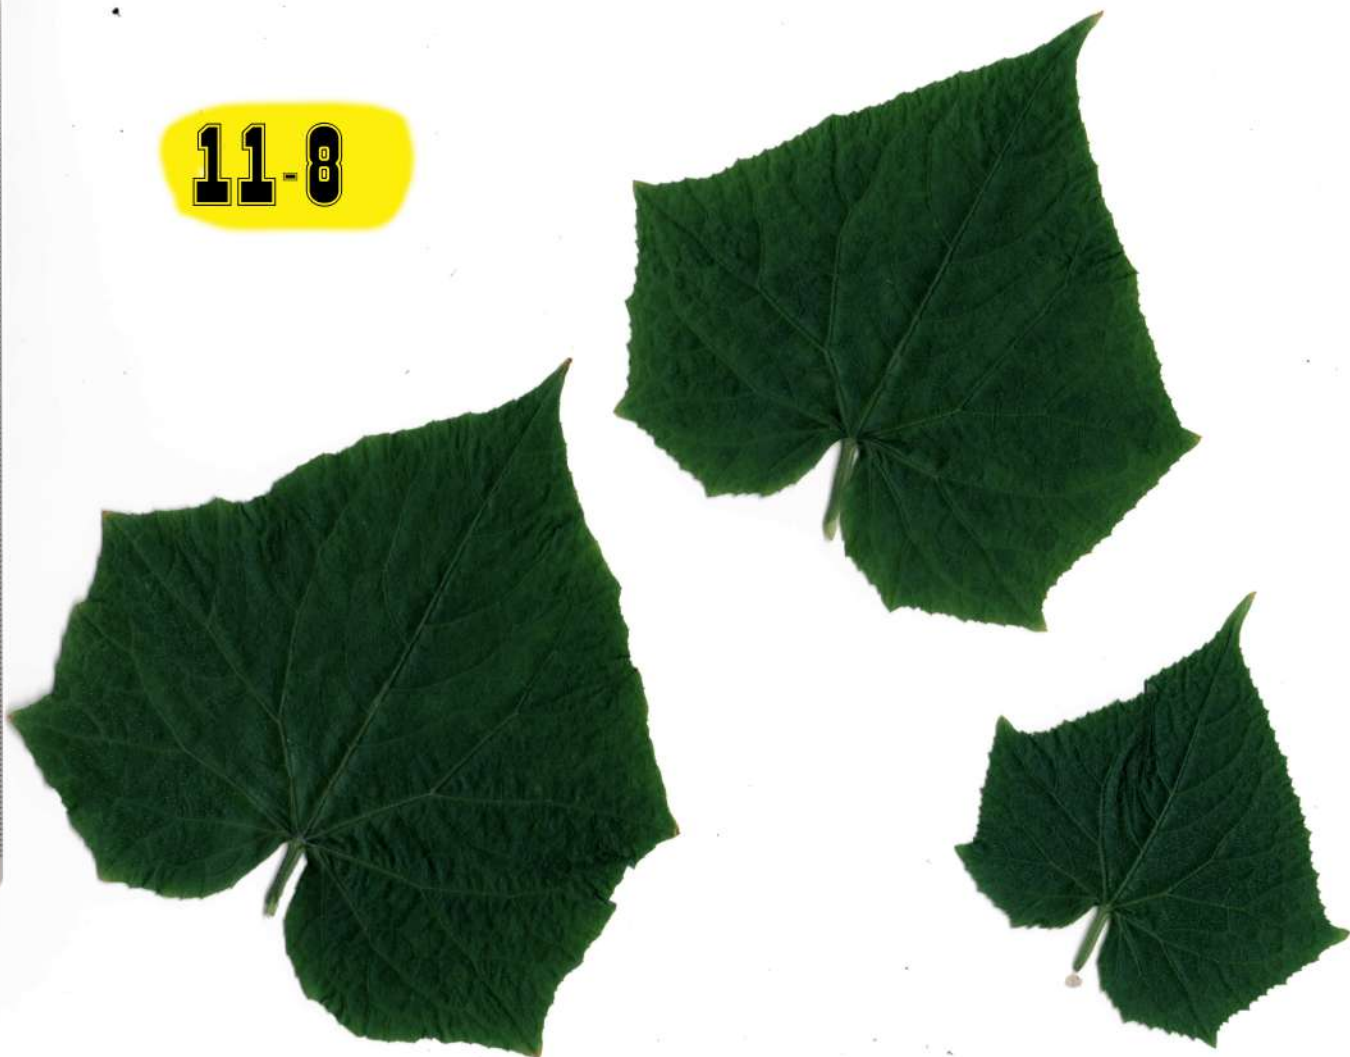

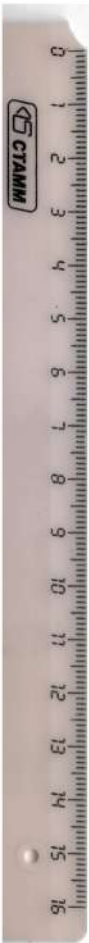

22-8

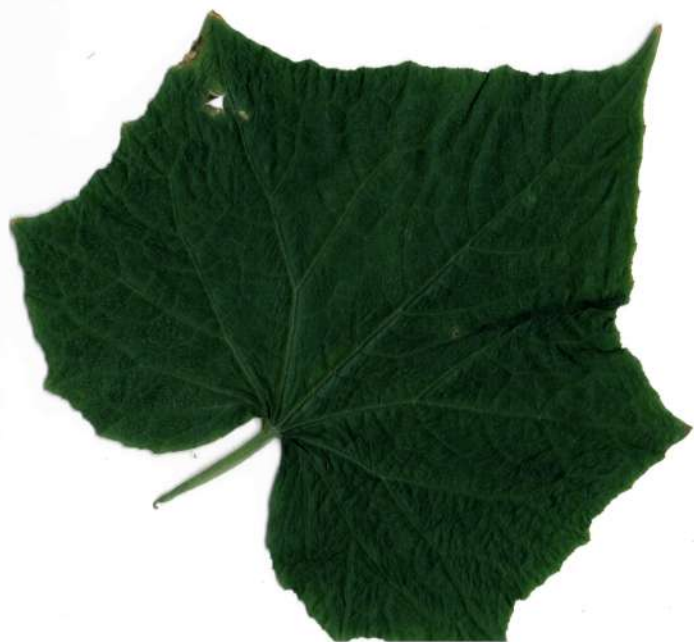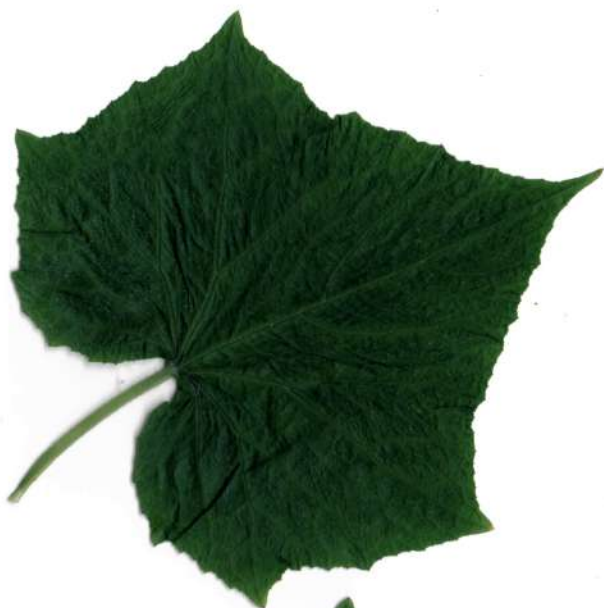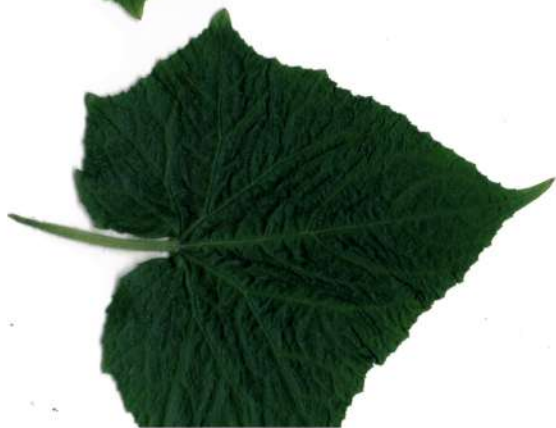

33-8

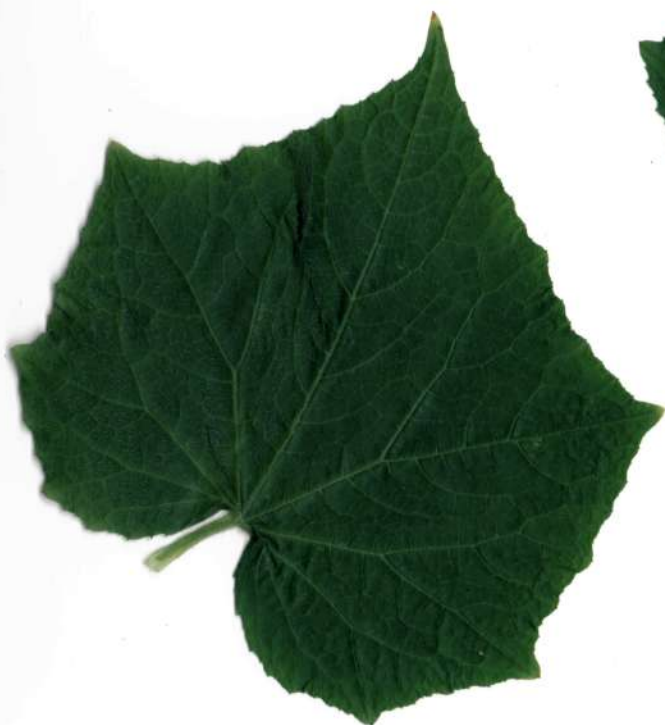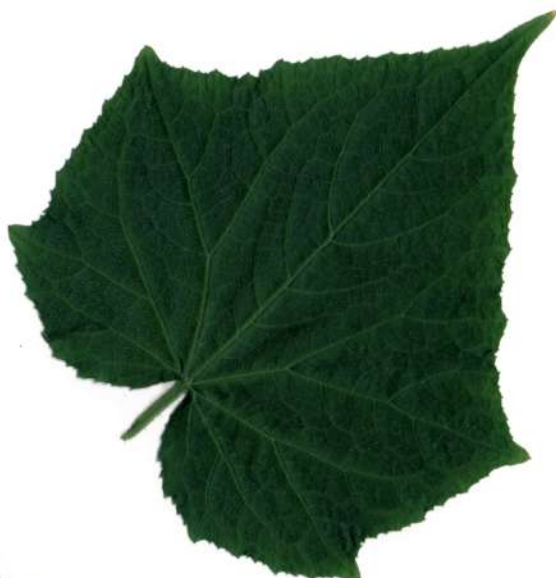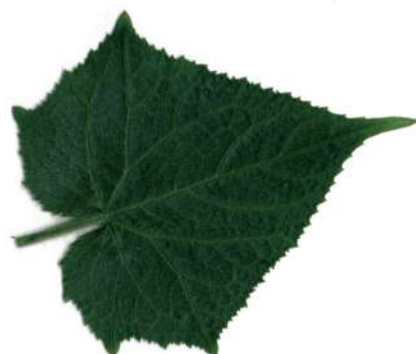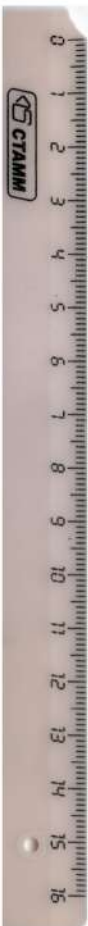

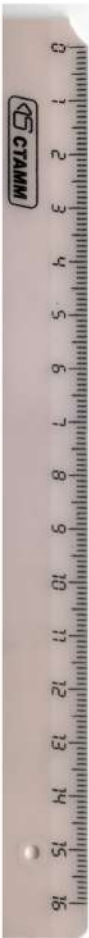

019

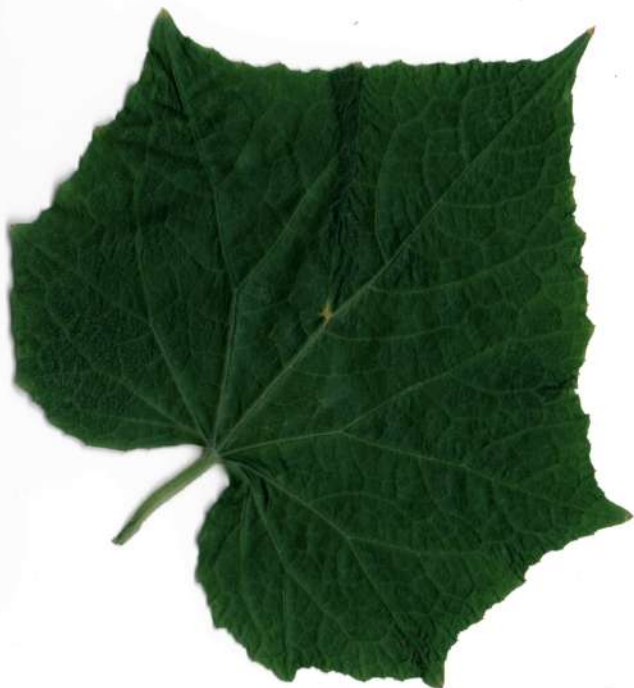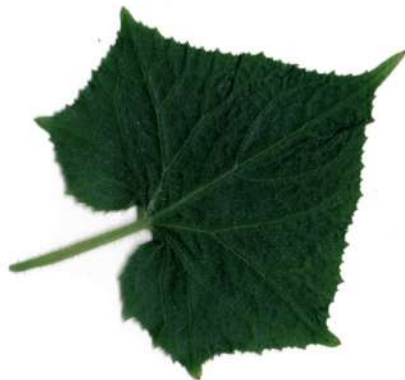



11-9

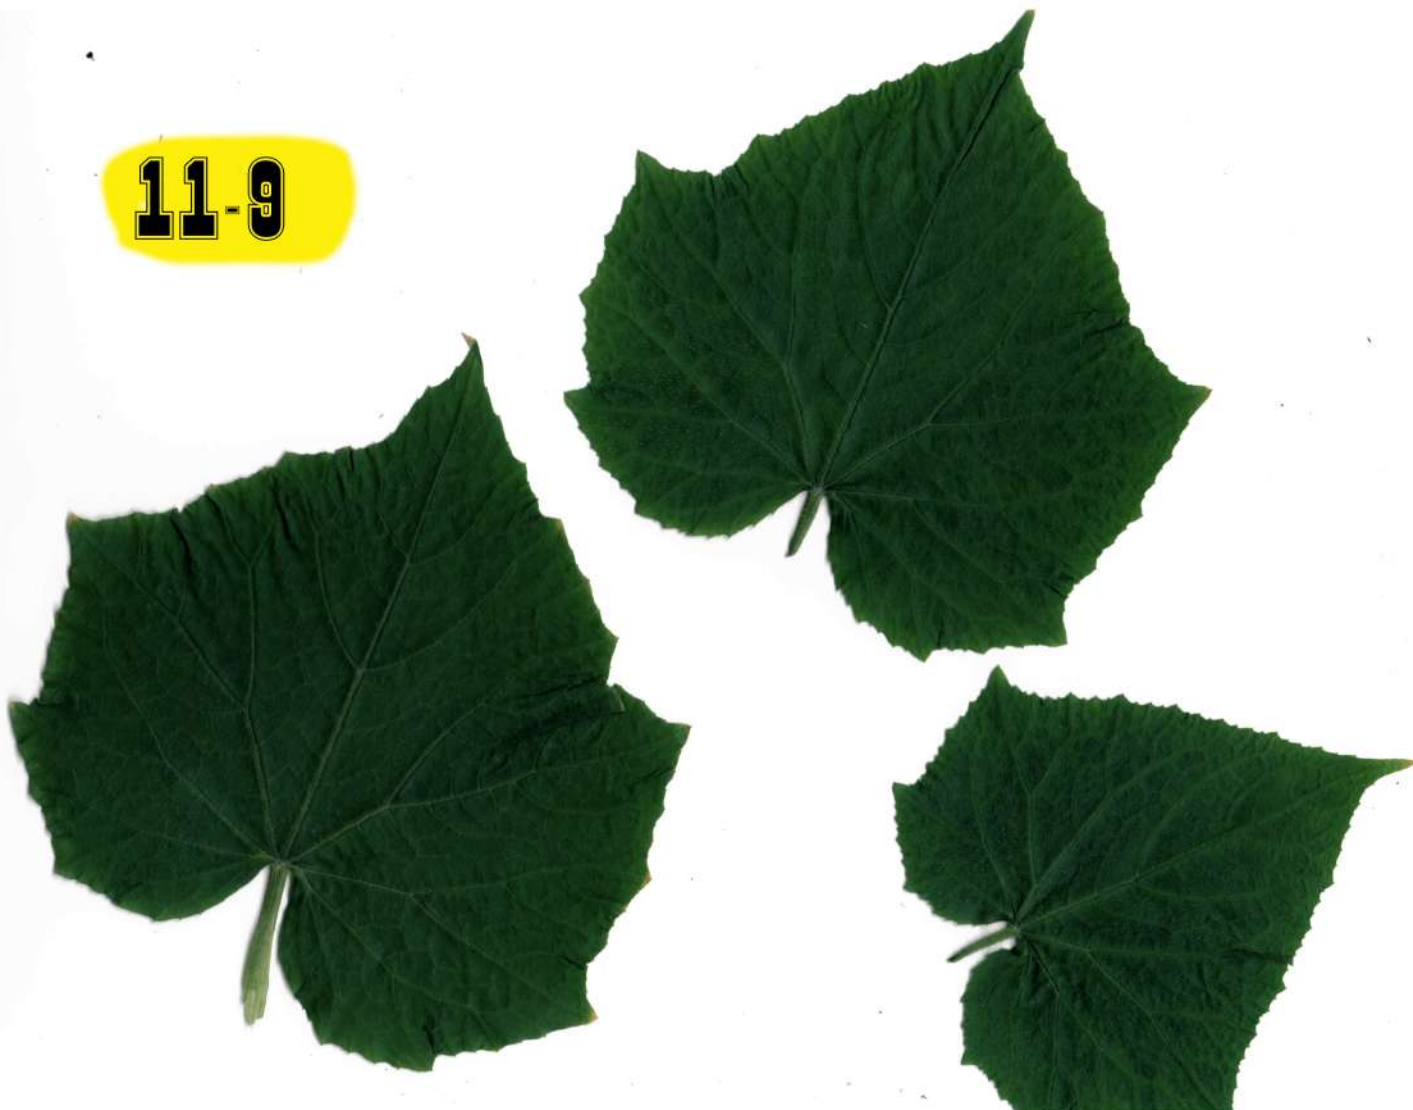

22-9

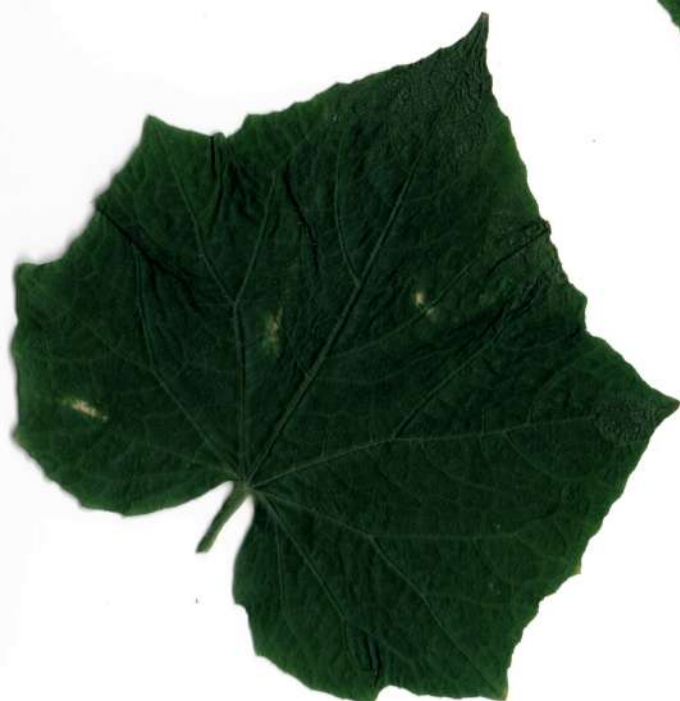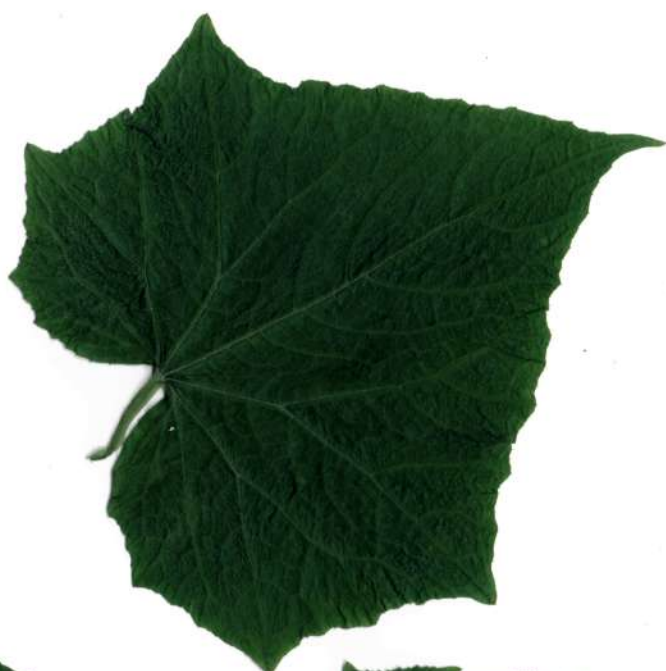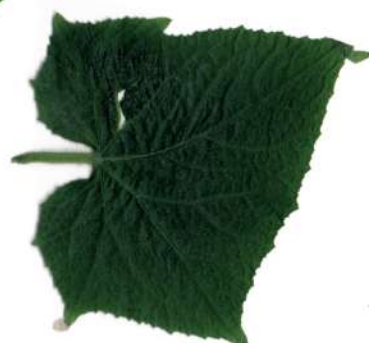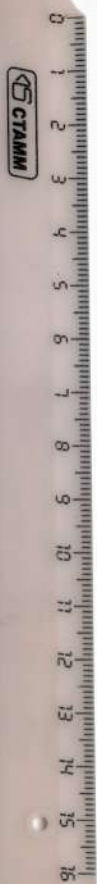

33-9

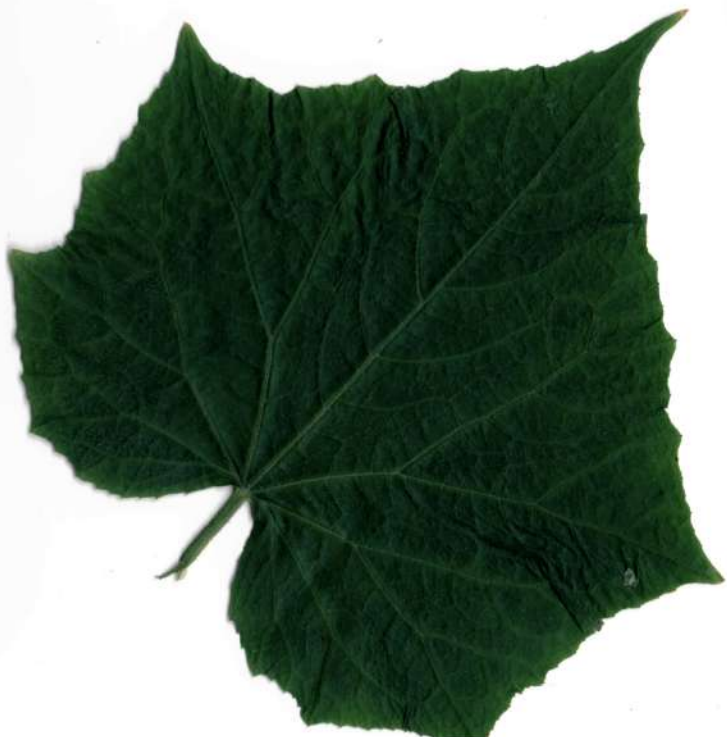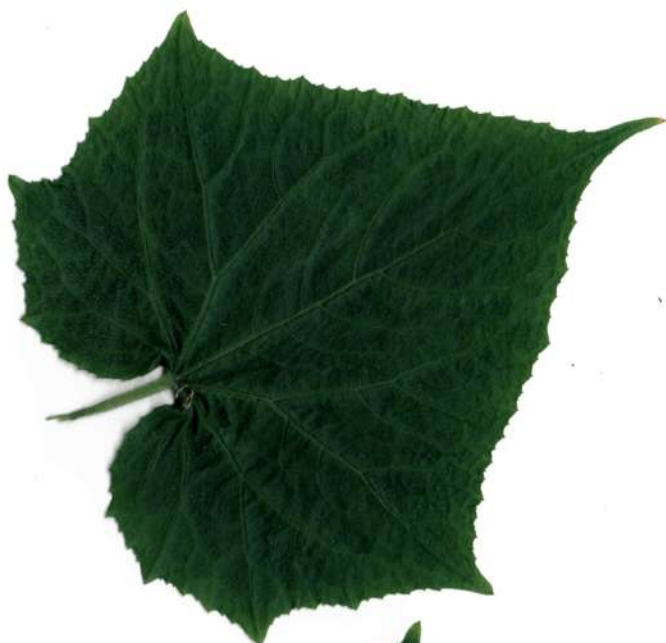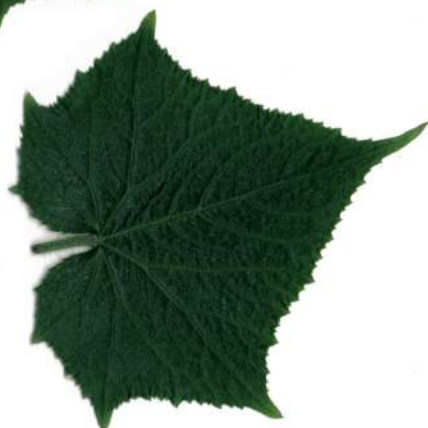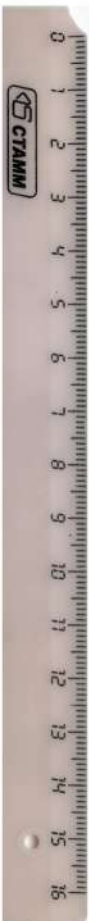

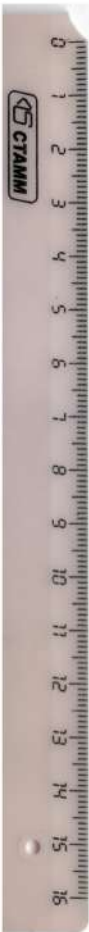

01

10

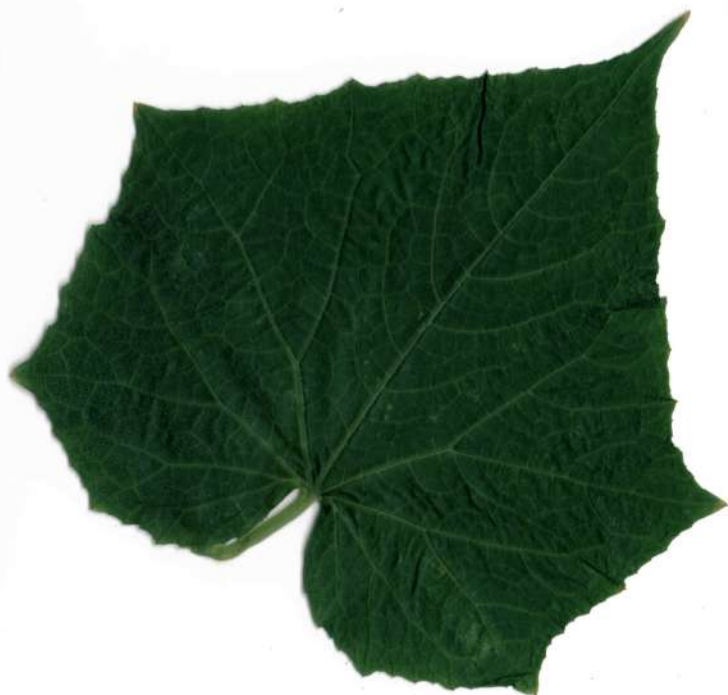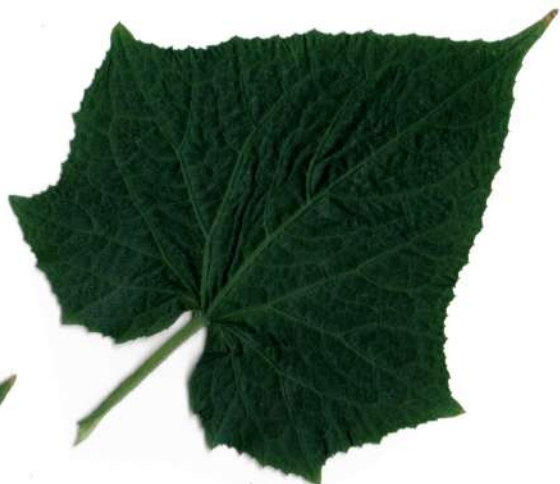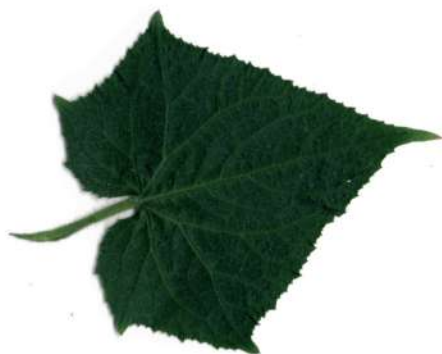



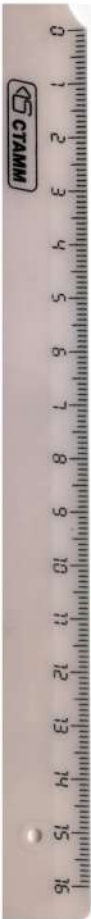

11-10

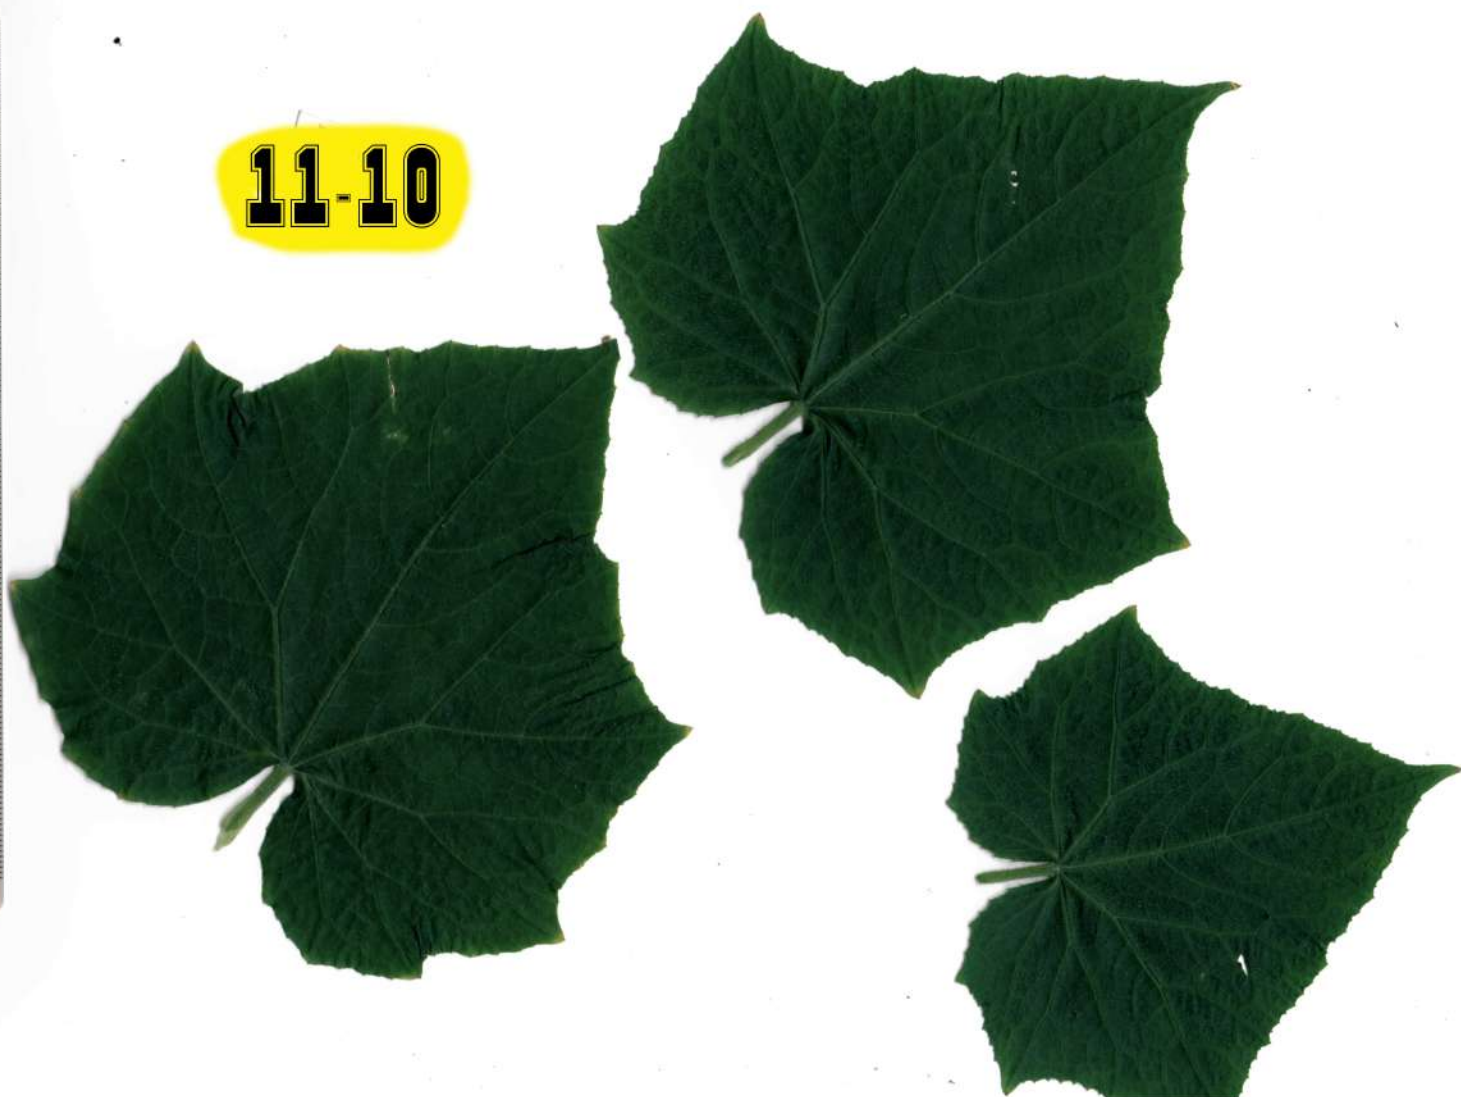



22-10

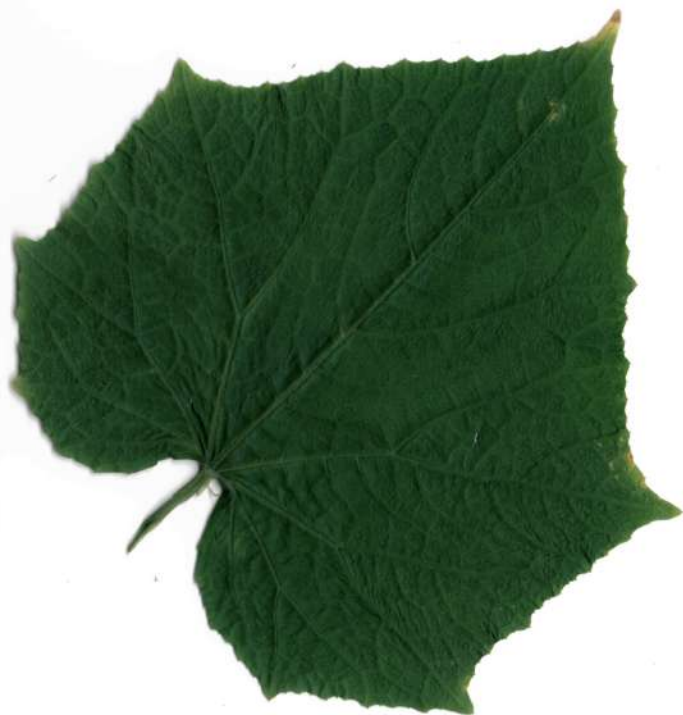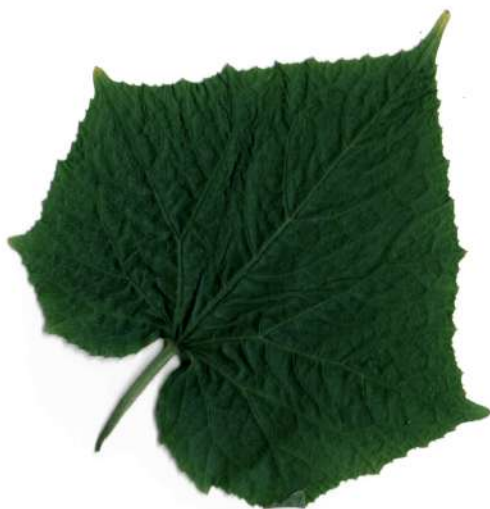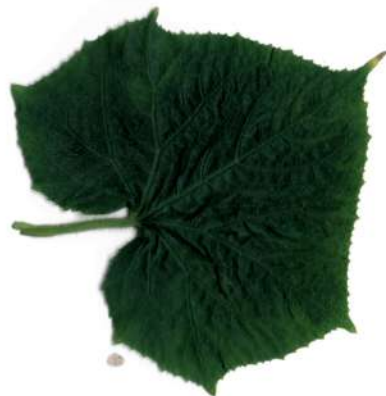

33-10

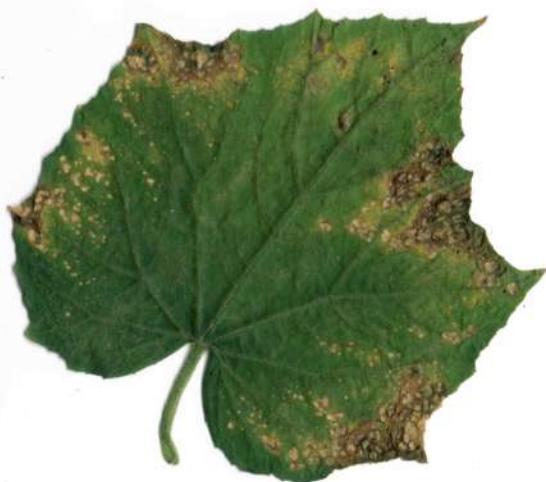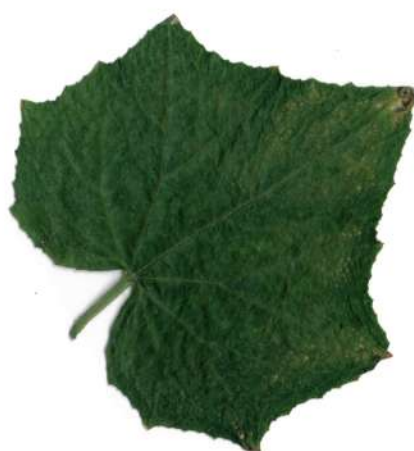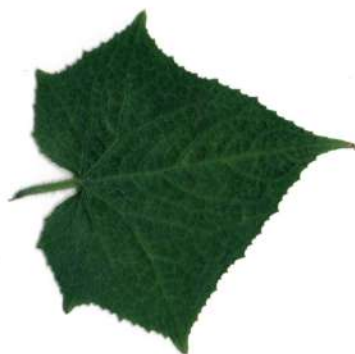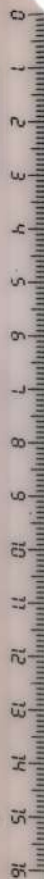

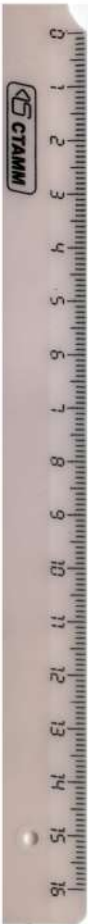

01

11

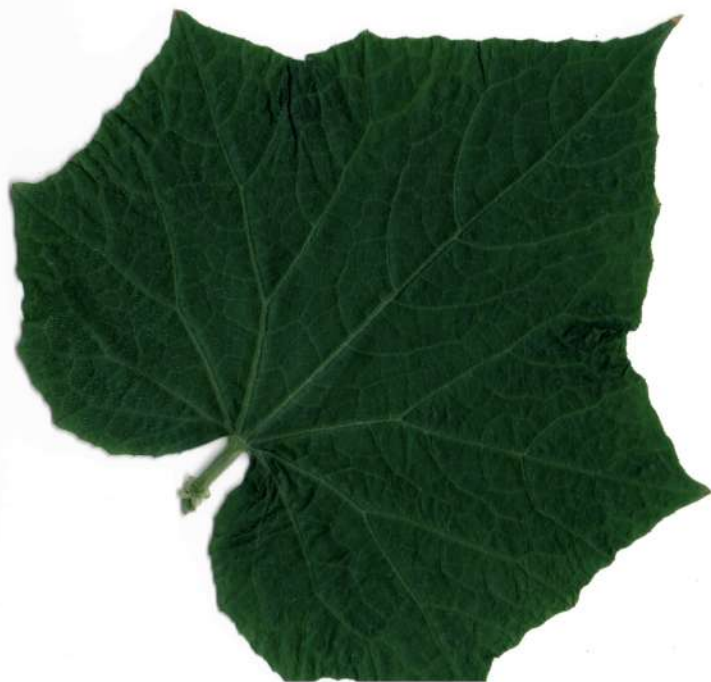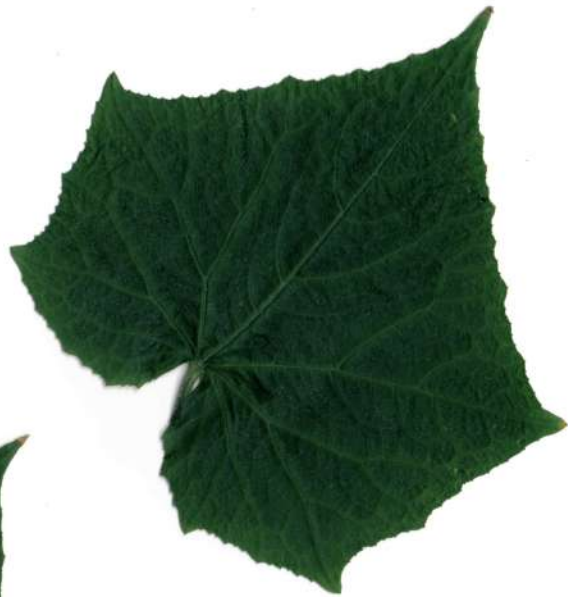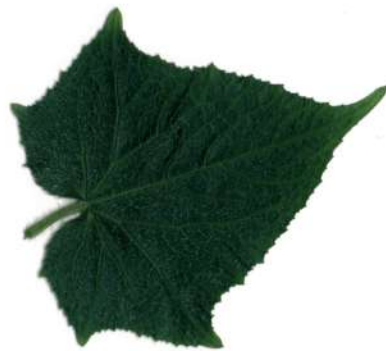

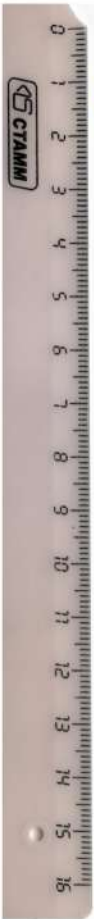

11-11

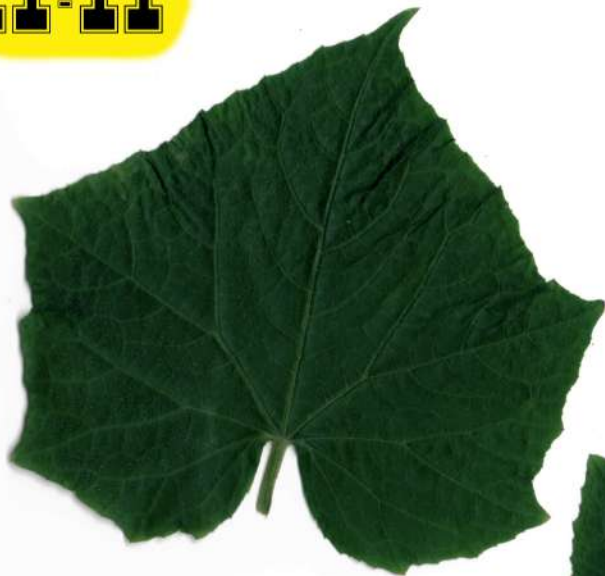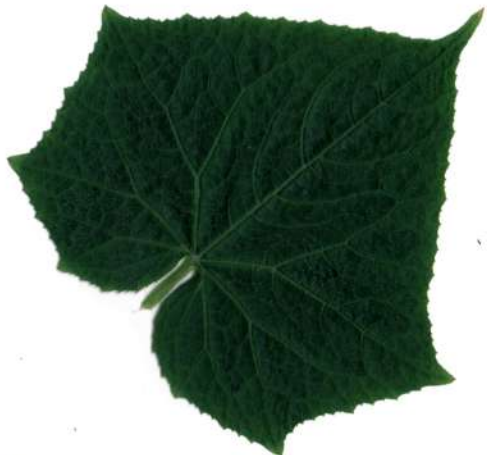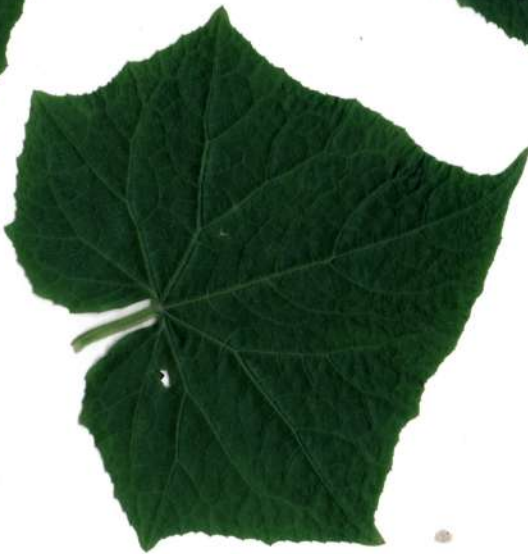

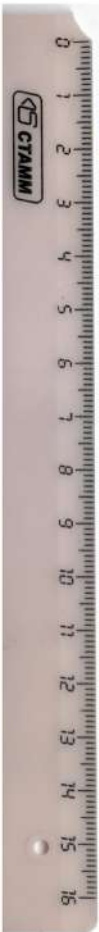

22-11

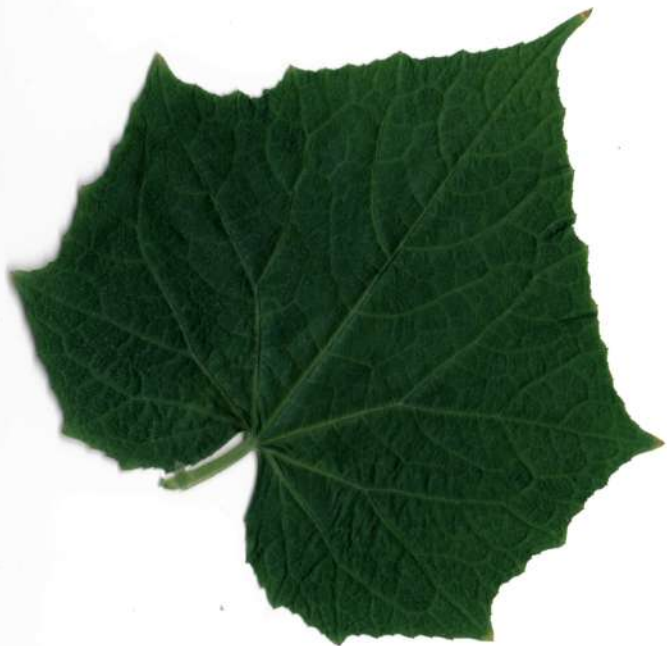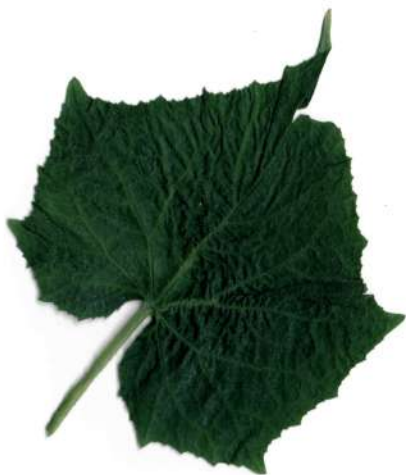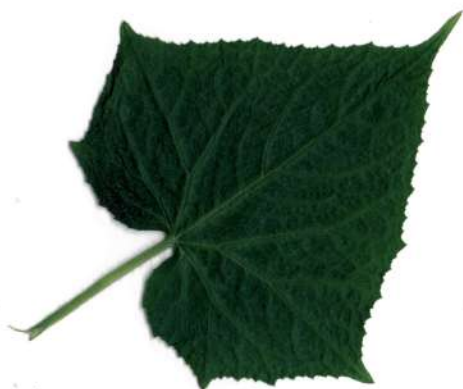



33-11

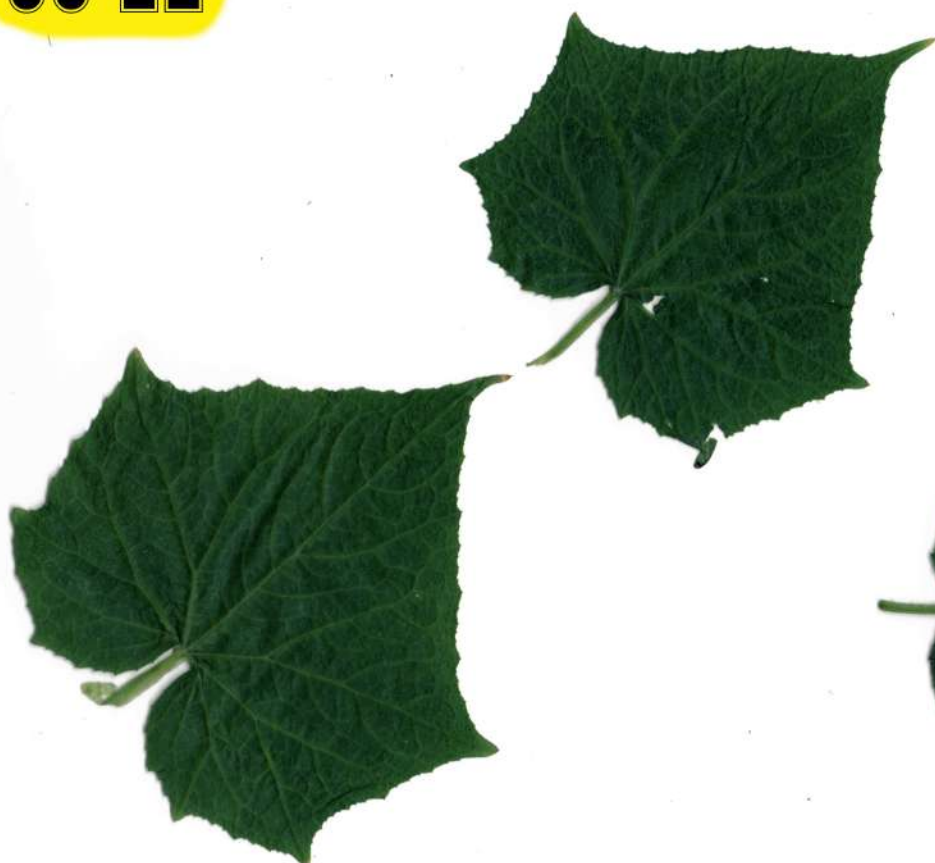

01

12

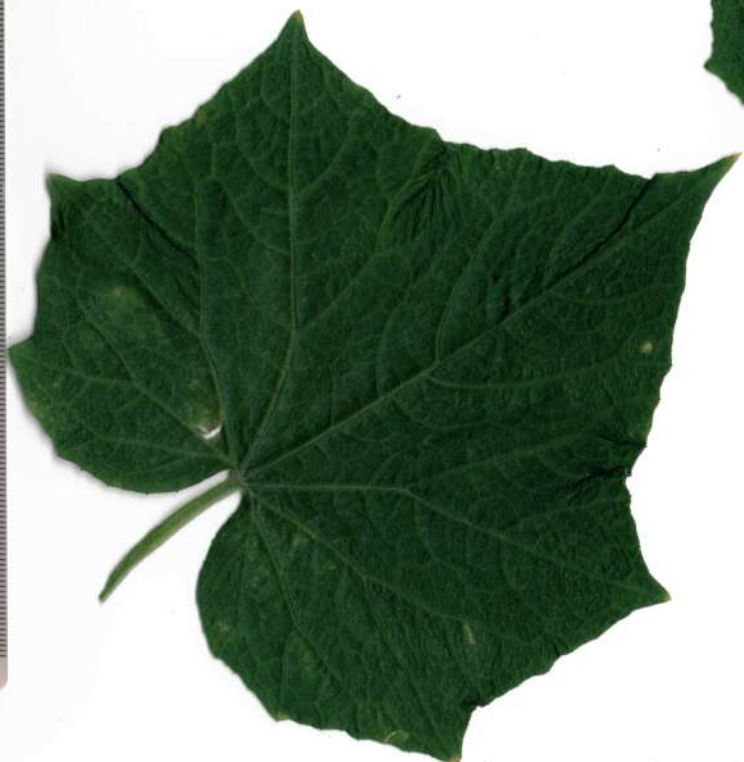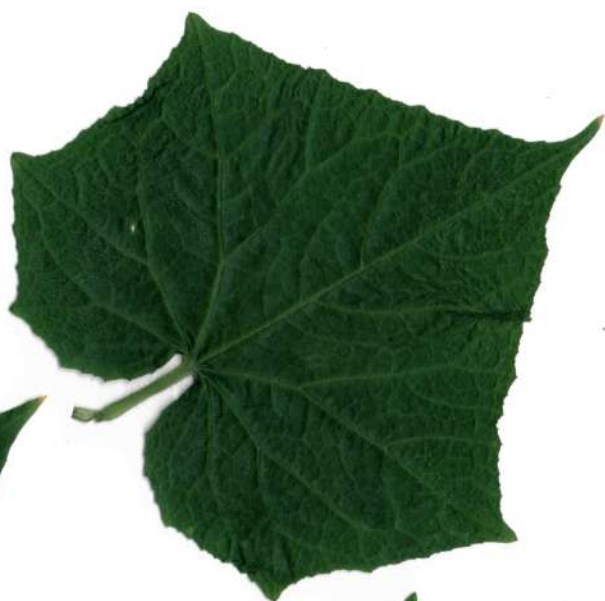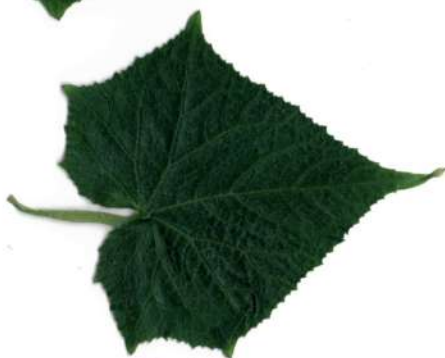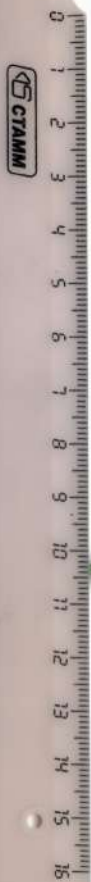

**11-12**

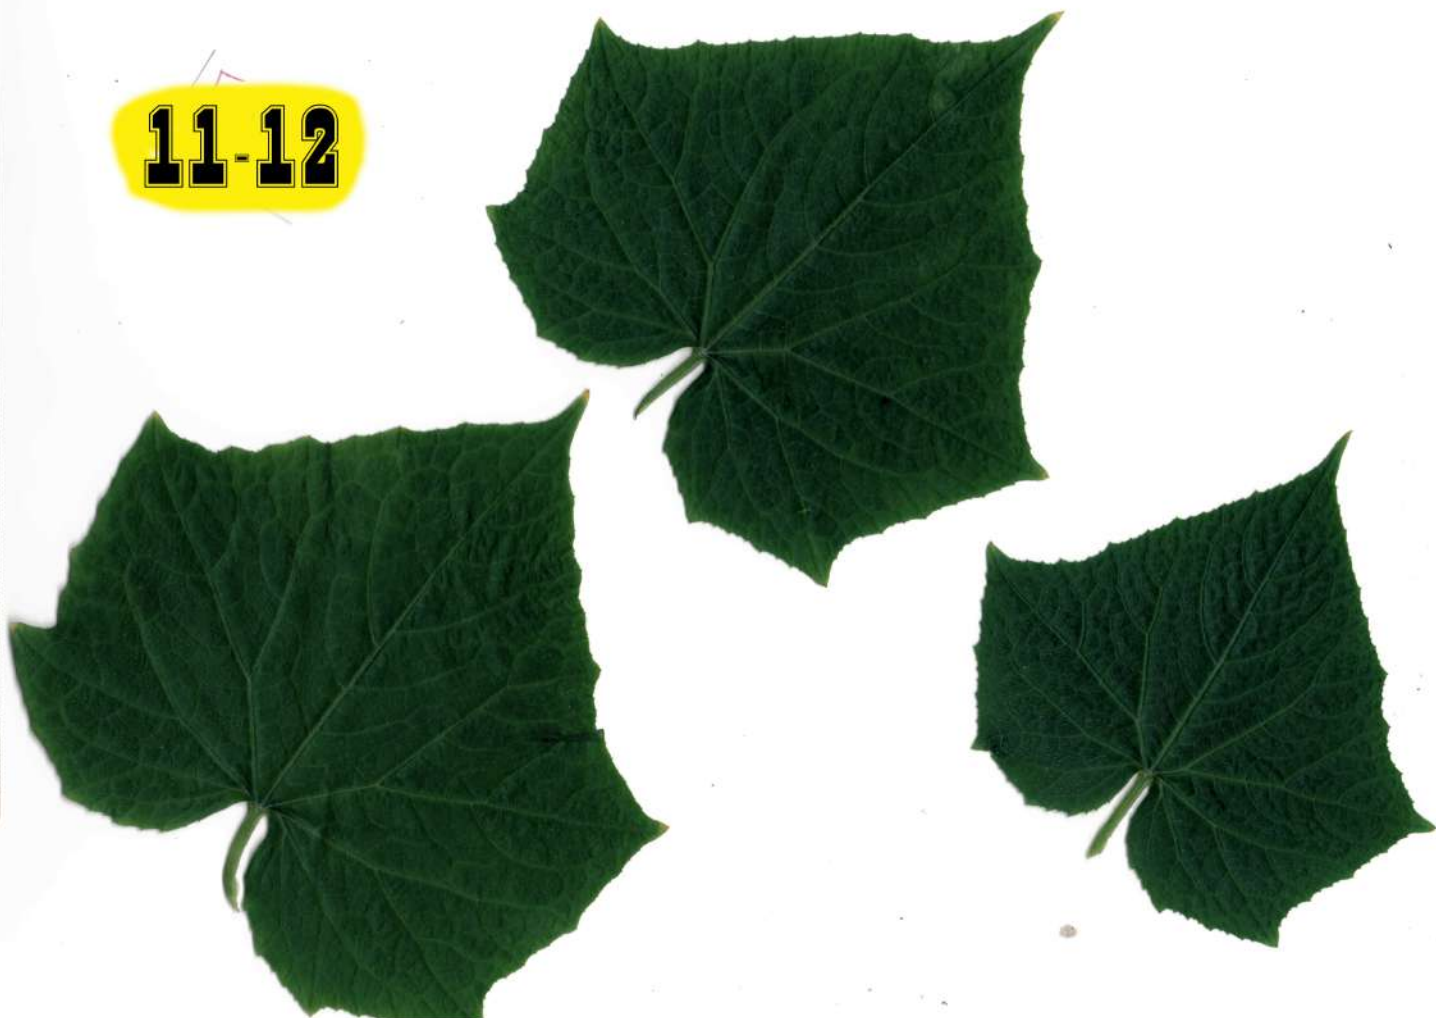

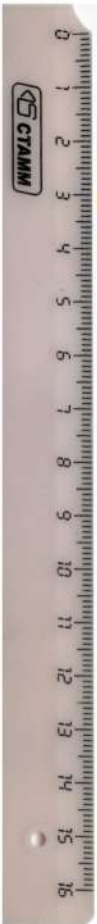

22-12

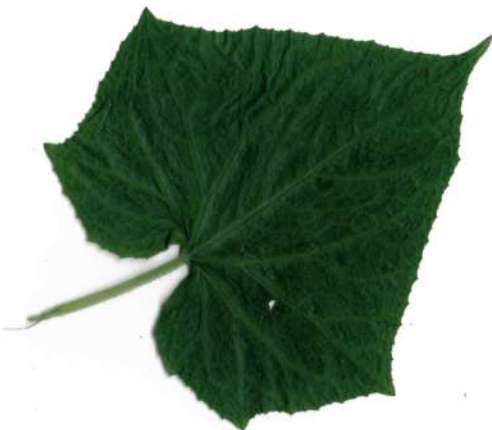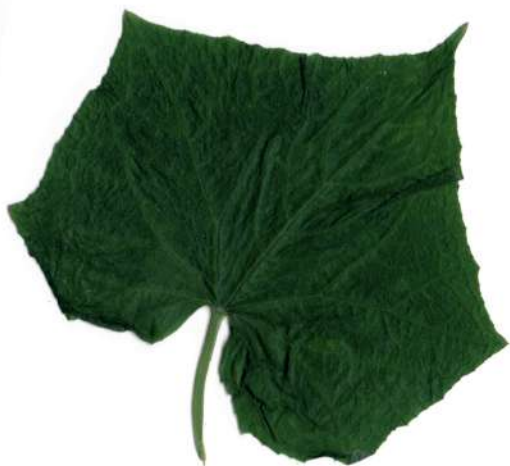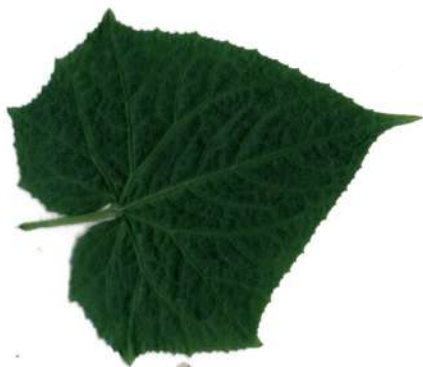

33-12

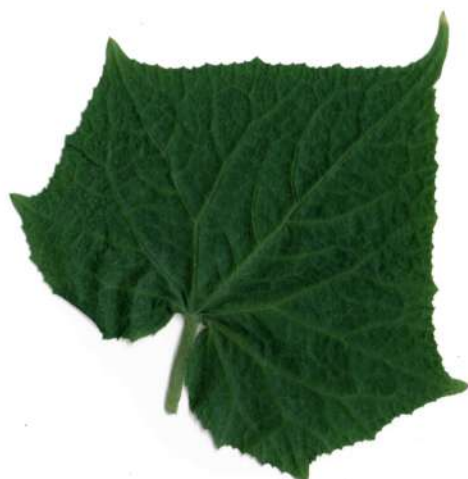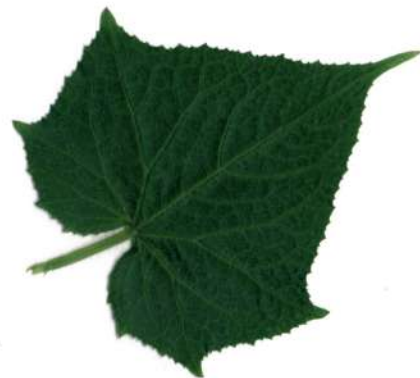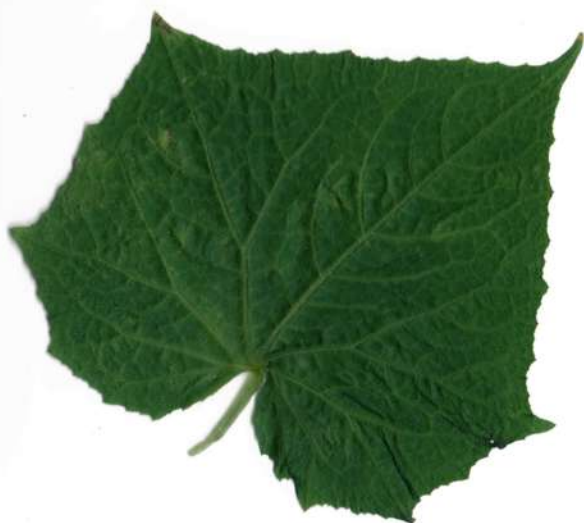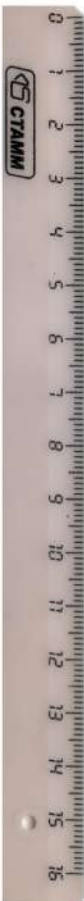



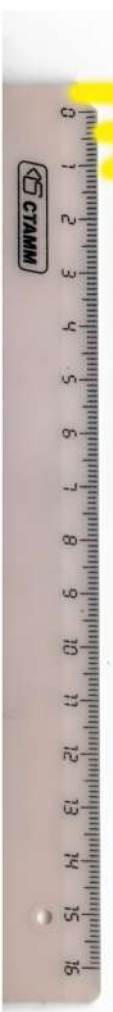

01

13

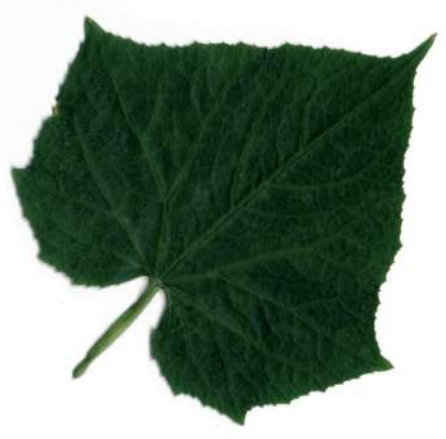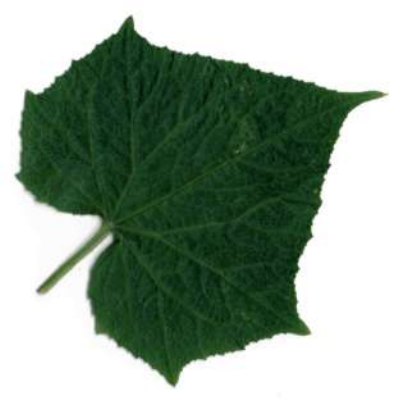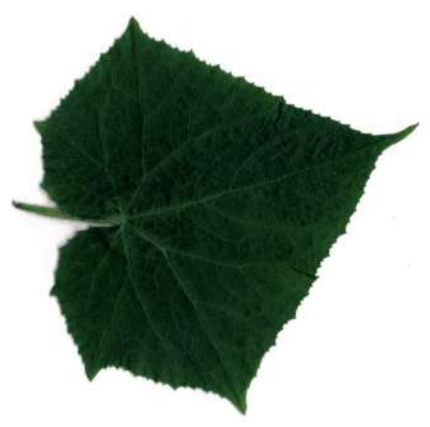

**11-13**

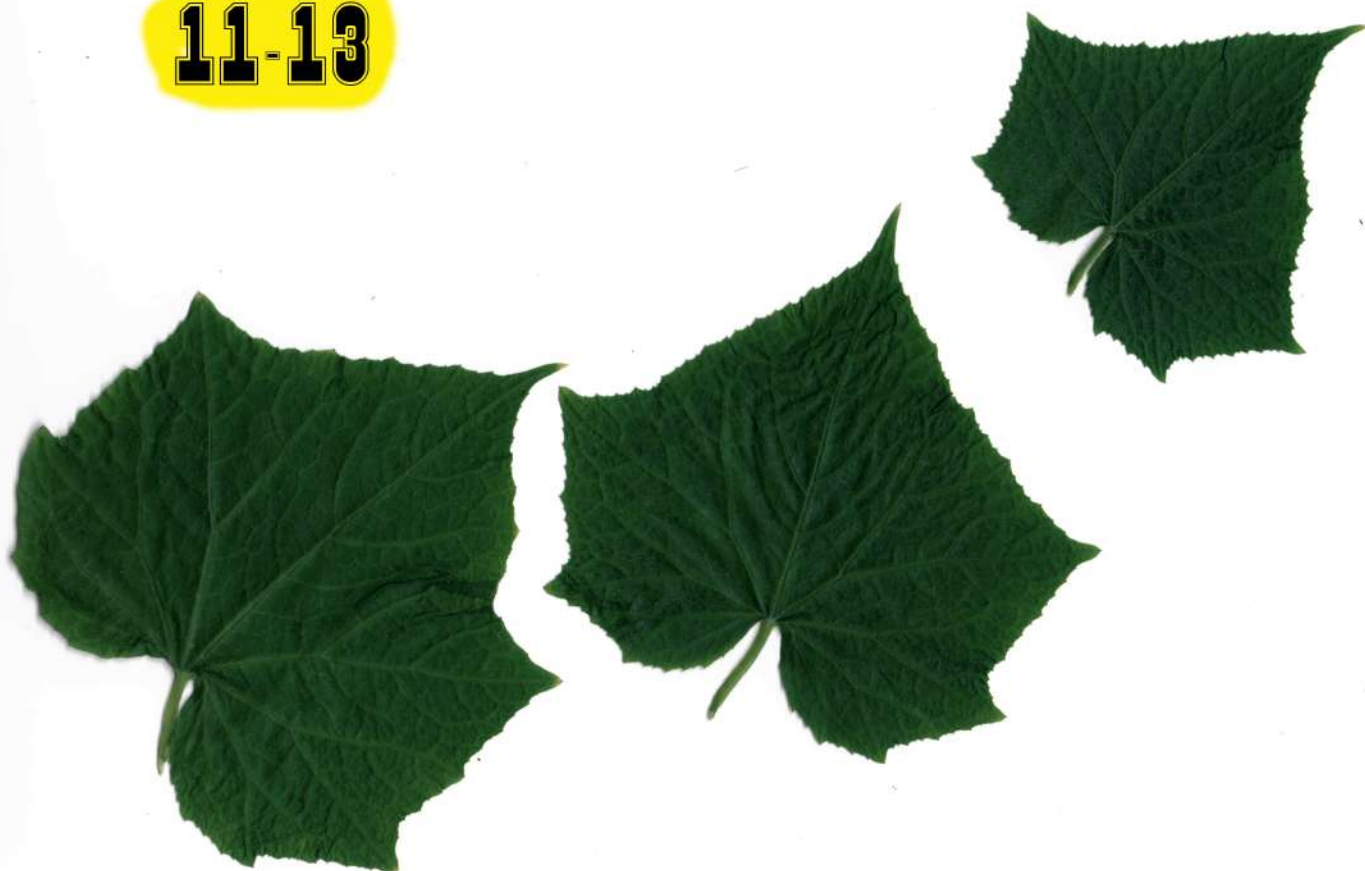

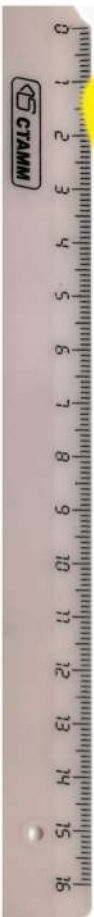

22-13

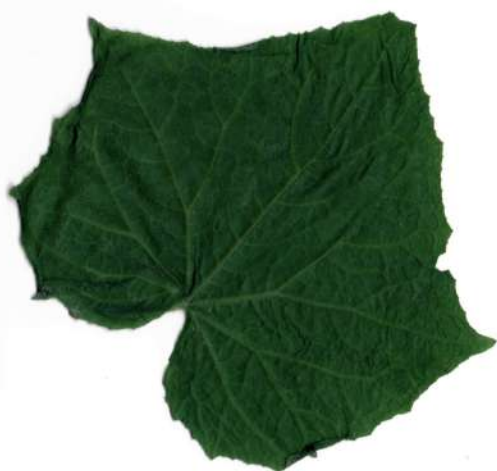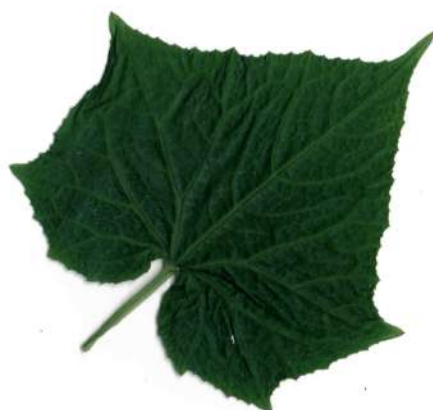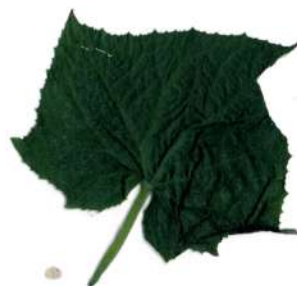

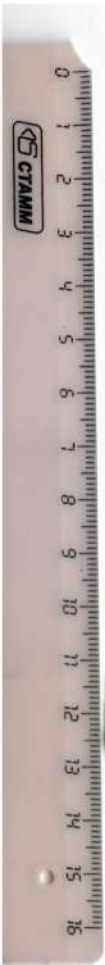

33-13

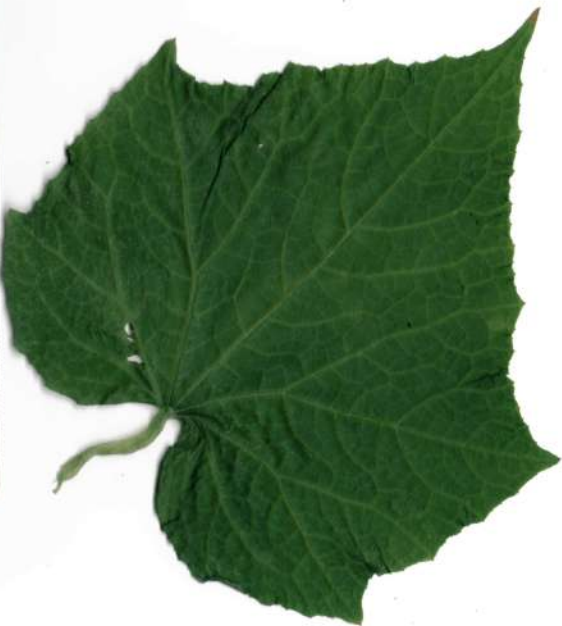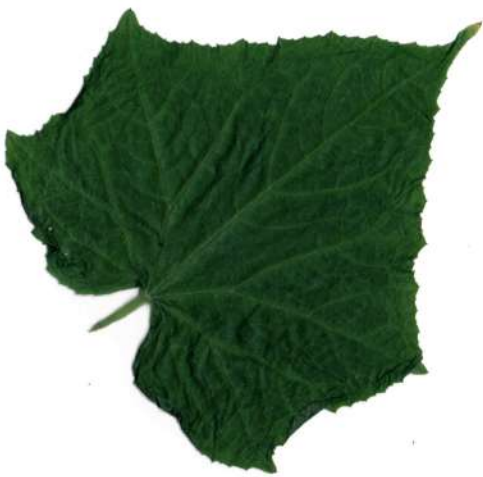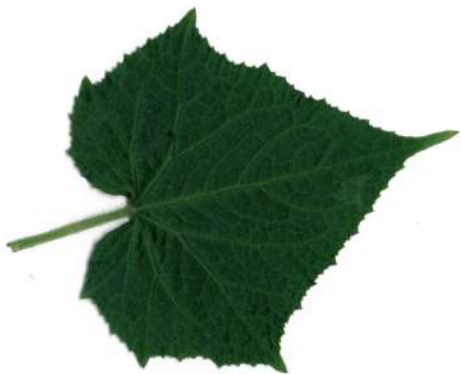

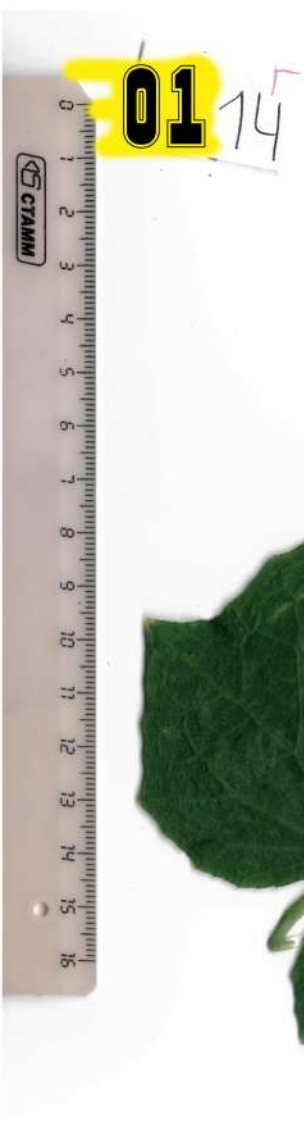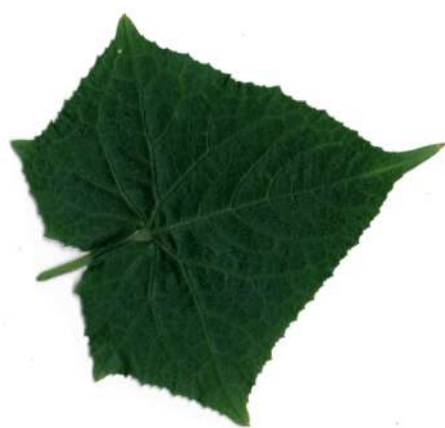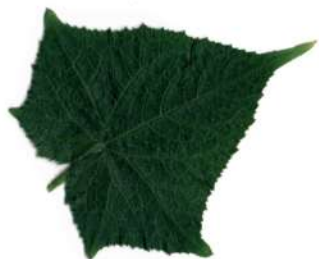



11-14

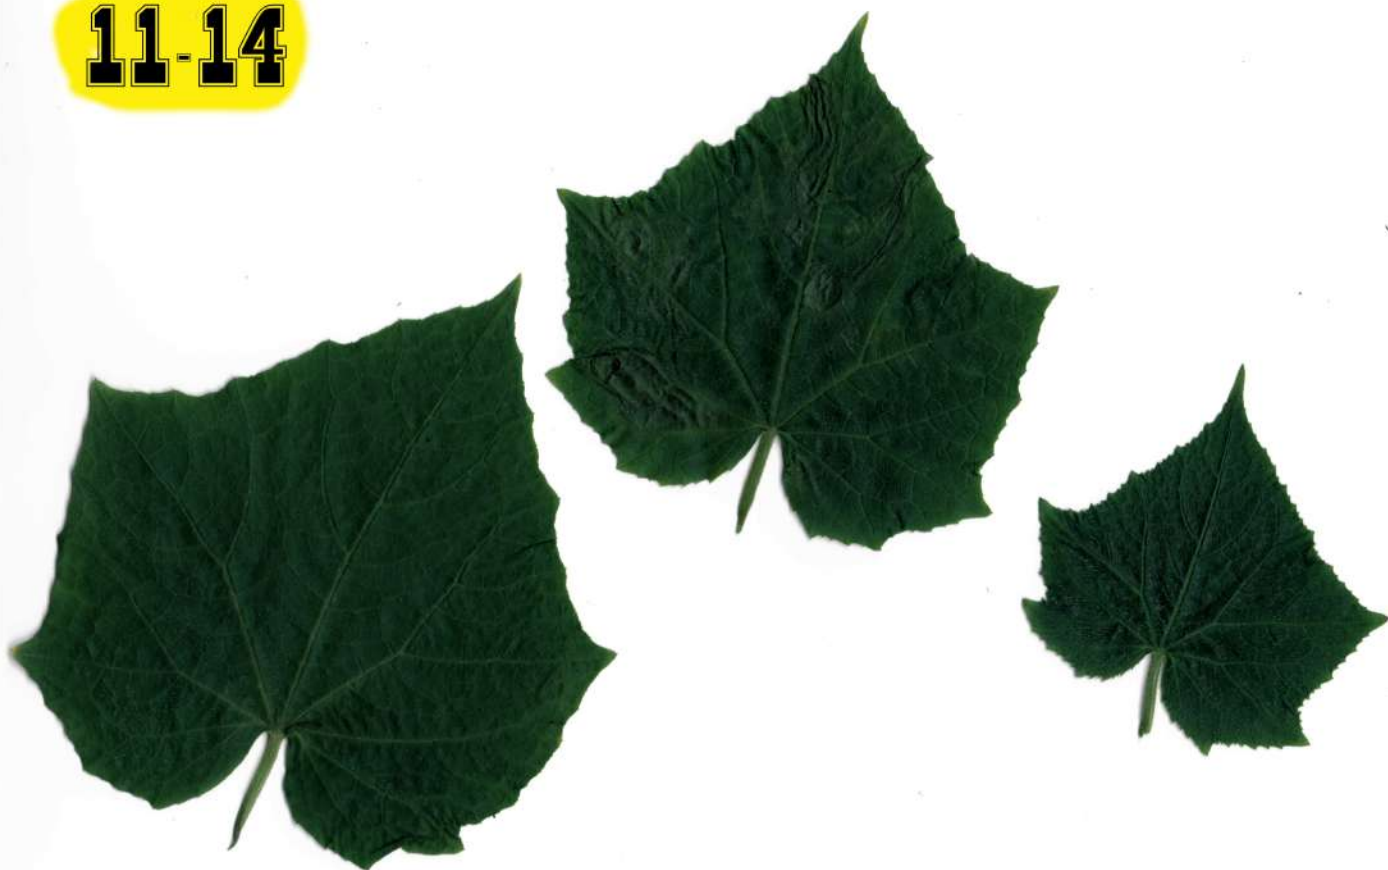

22-14

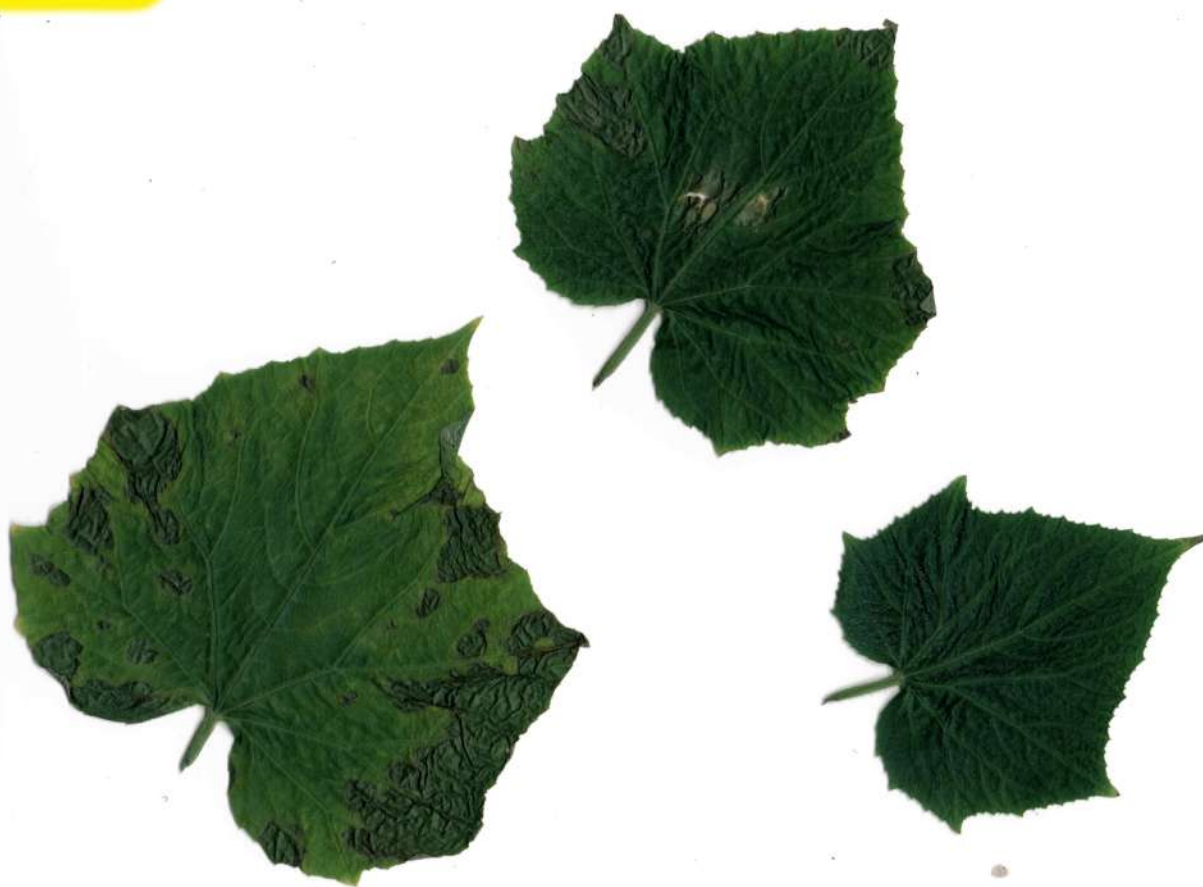

33-14

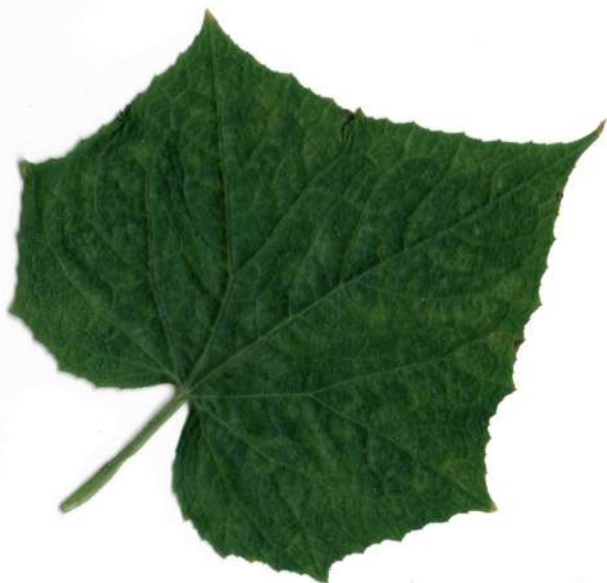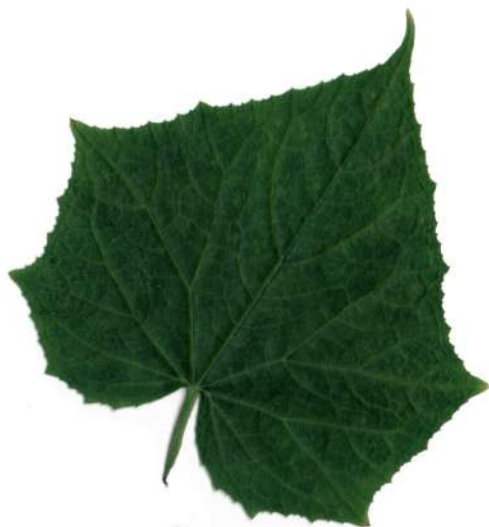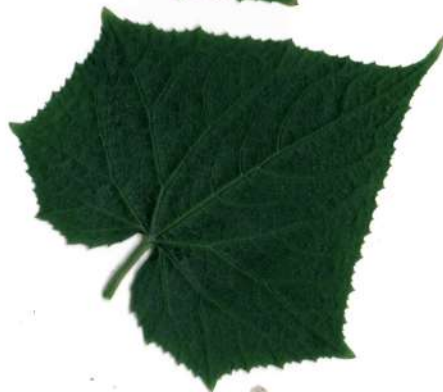

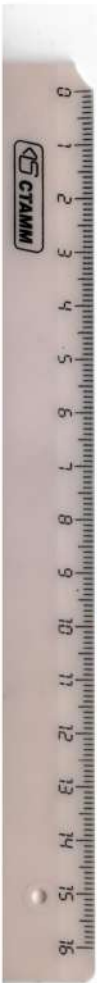

01/5

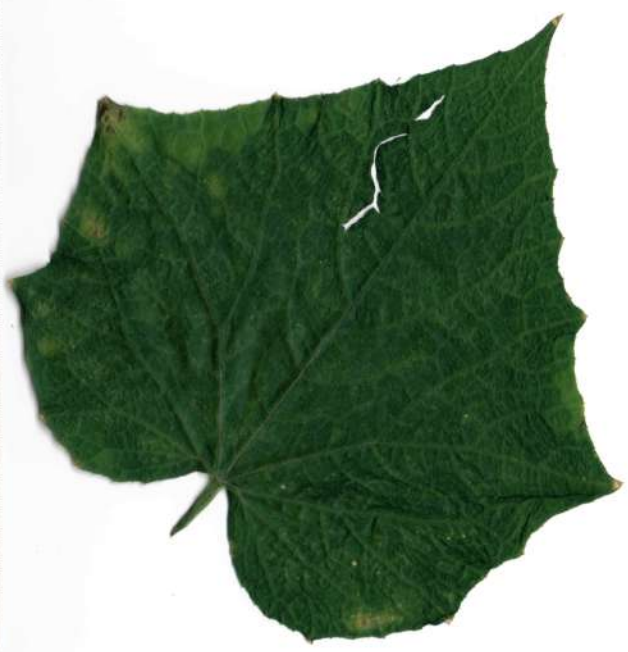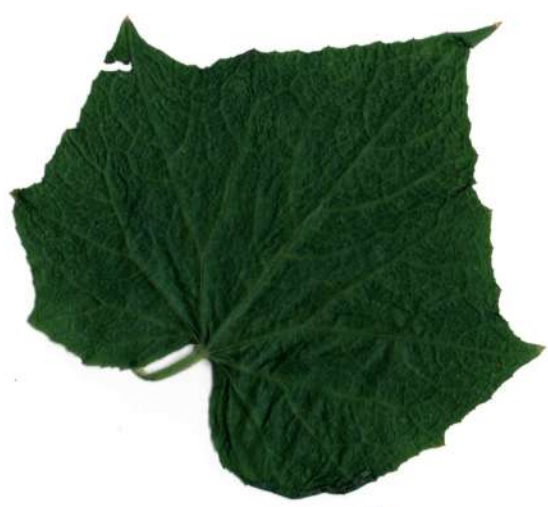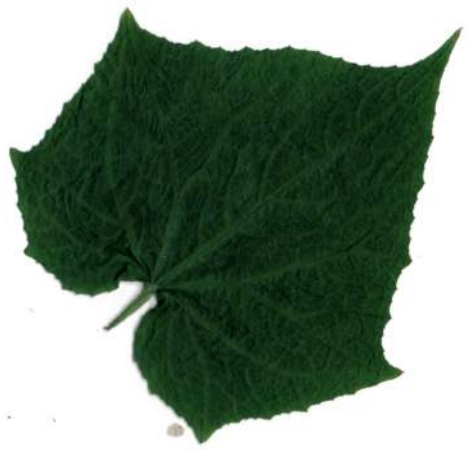

11-15

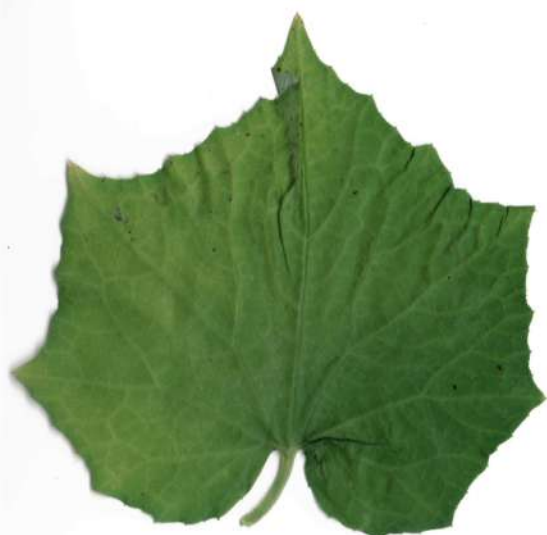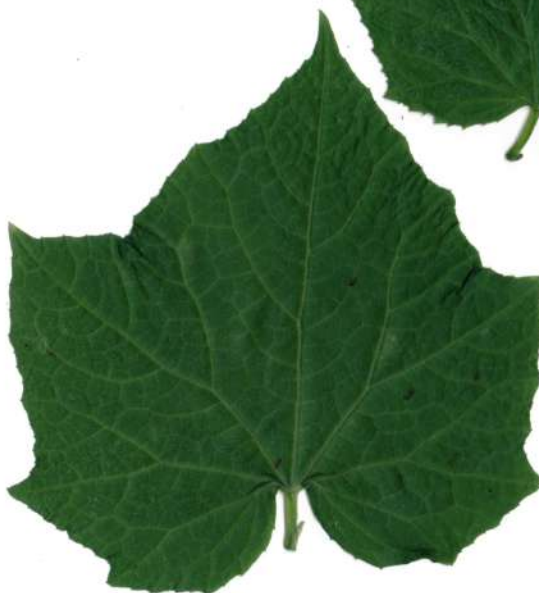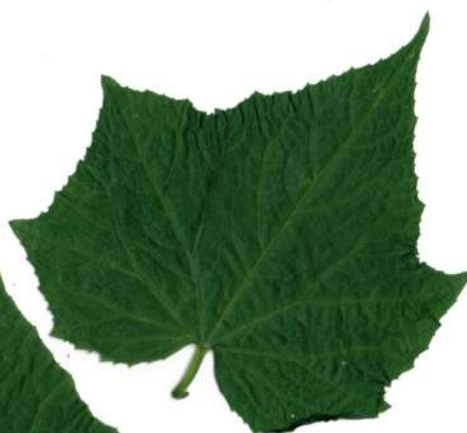



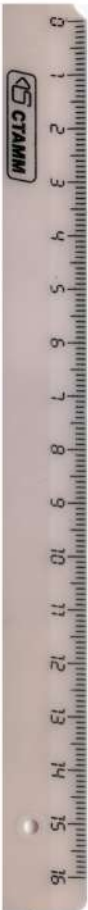

**22-15**

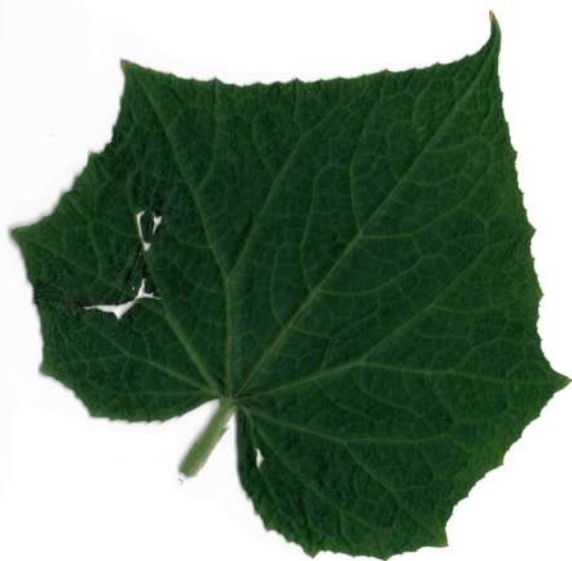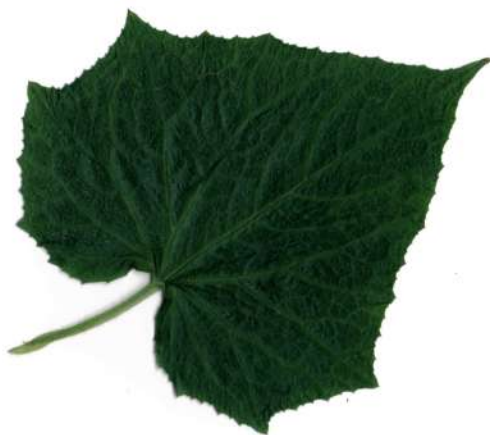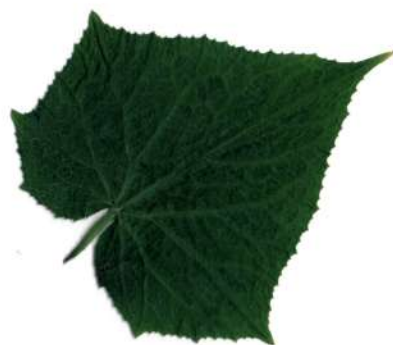

33-15

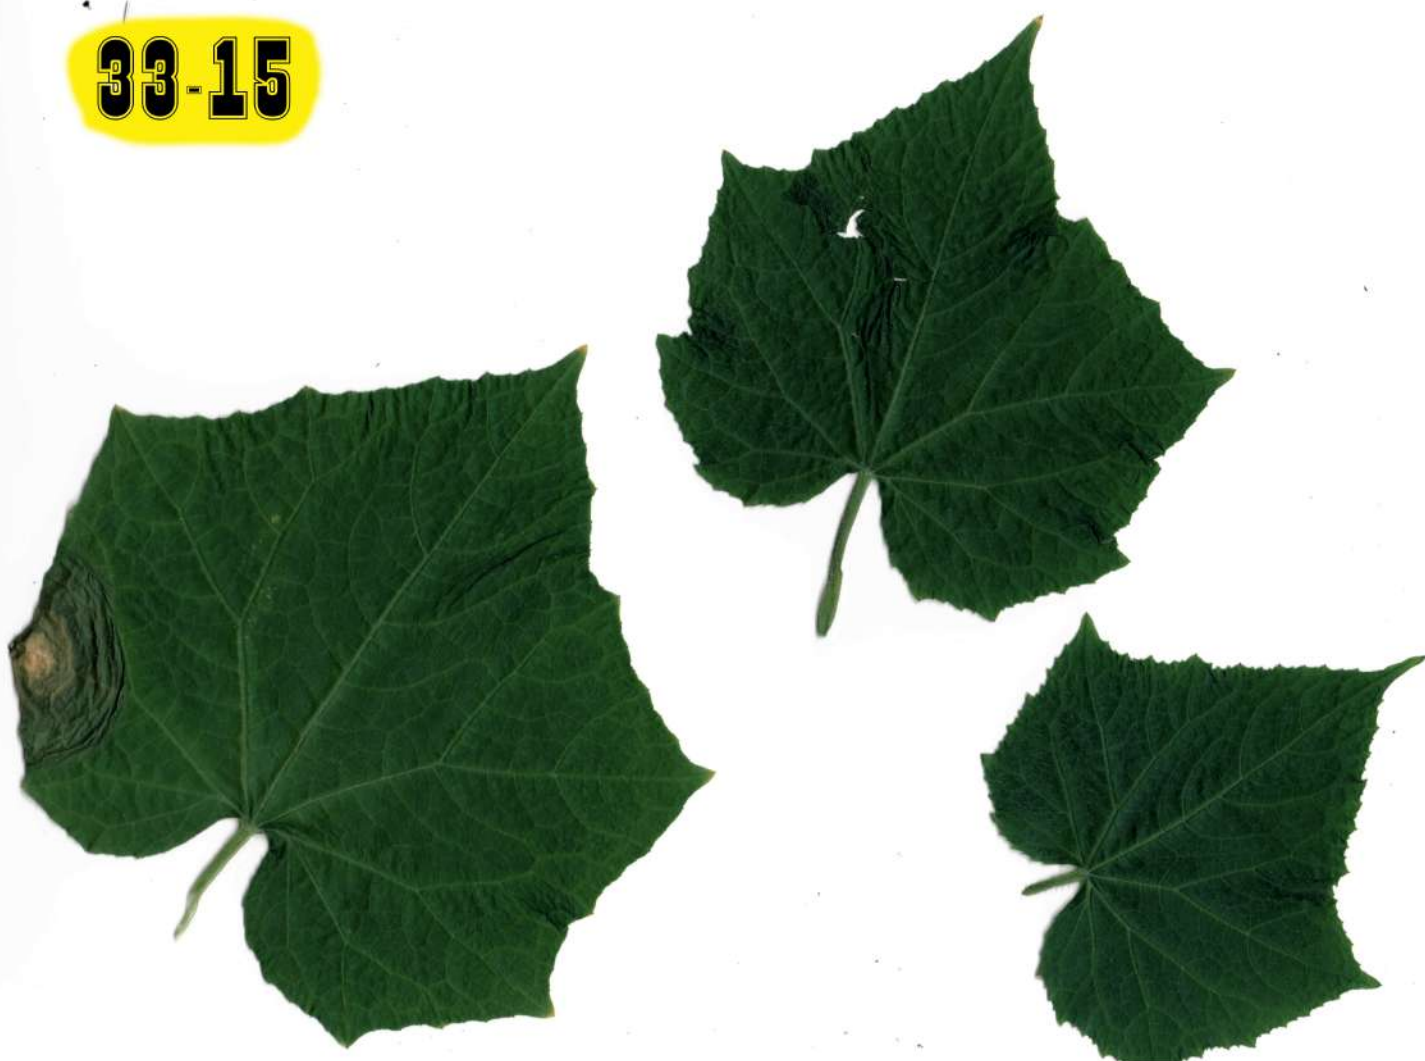

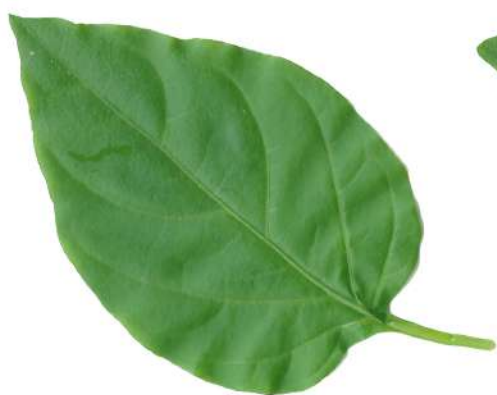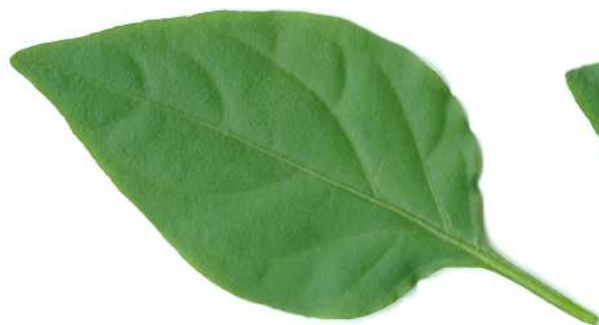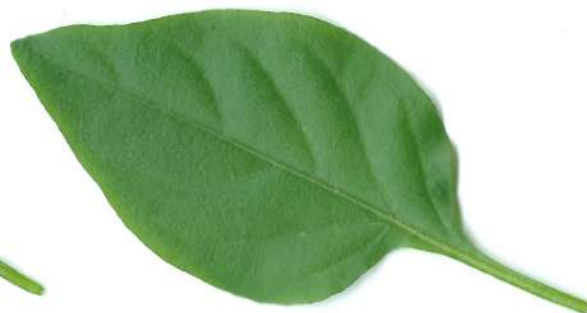

**11-1**

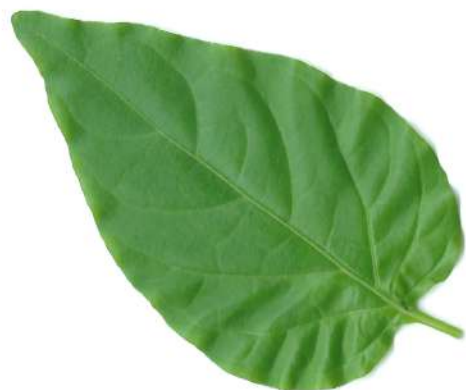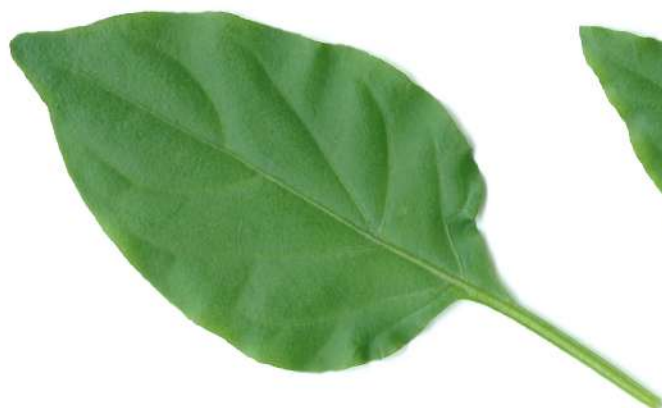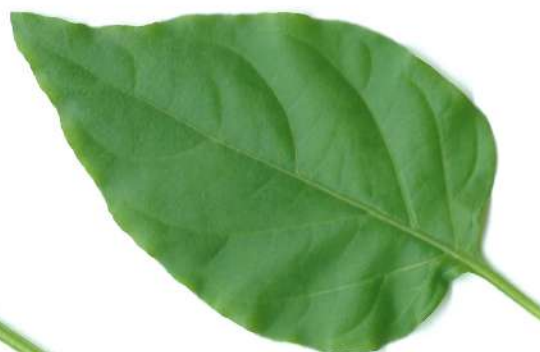

**11-2**

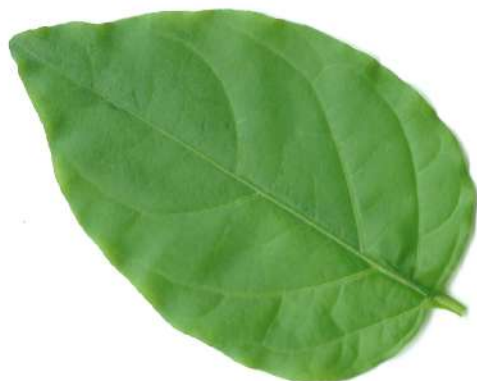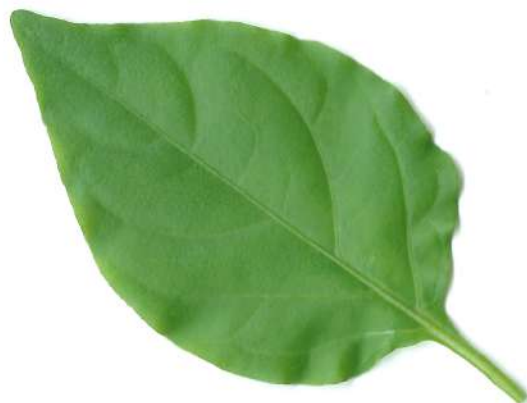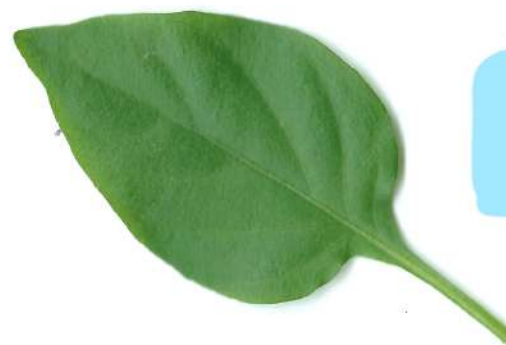

**11-3**

СТАНДАРТ

0 1 2 3 4 5 6 7 8 9 10 11 12 13 14 15



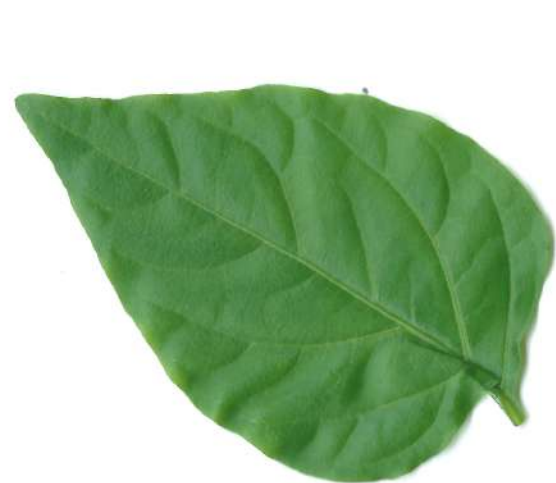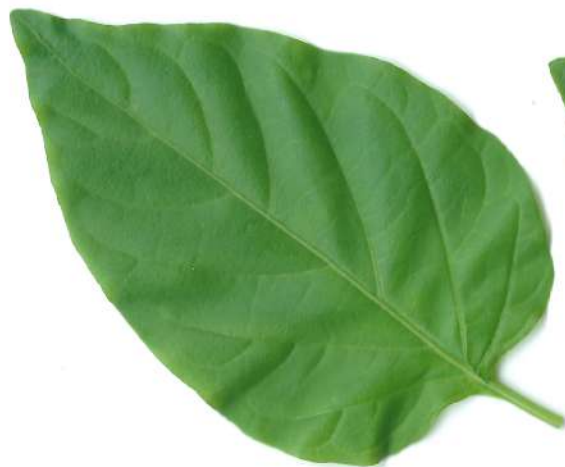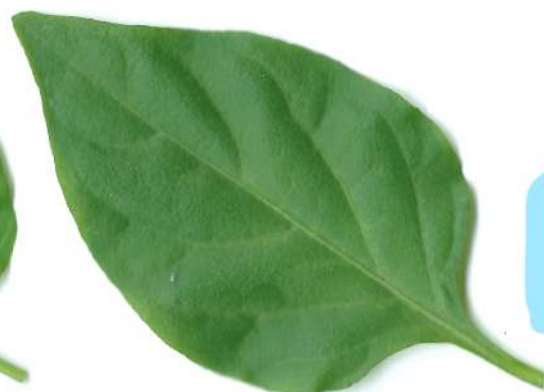

**11-4**

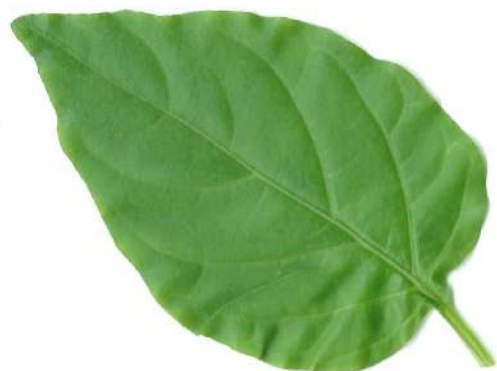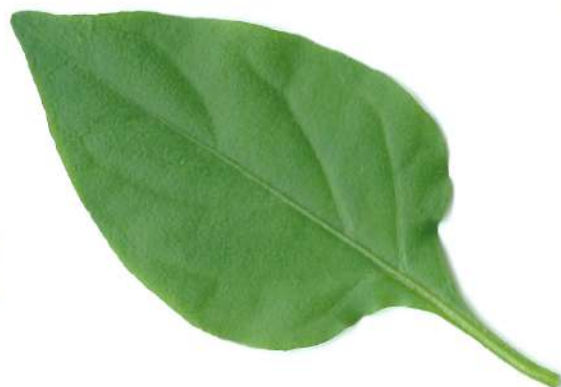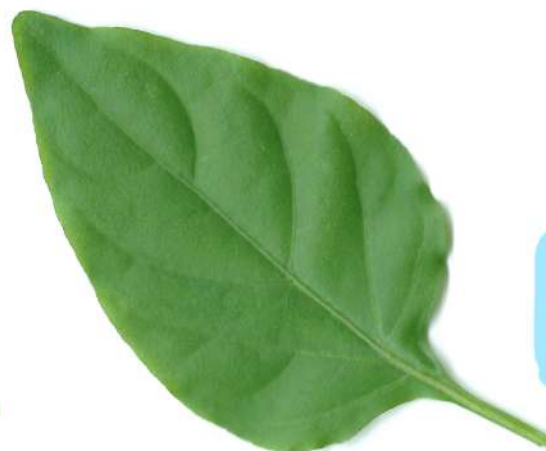

**11-5**

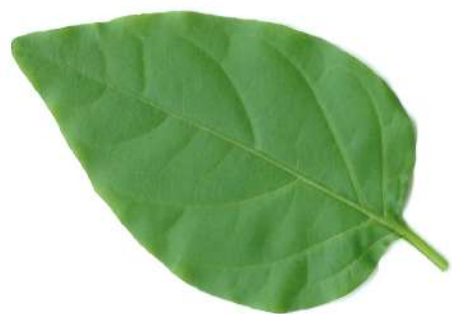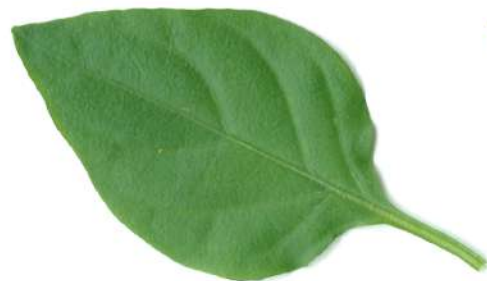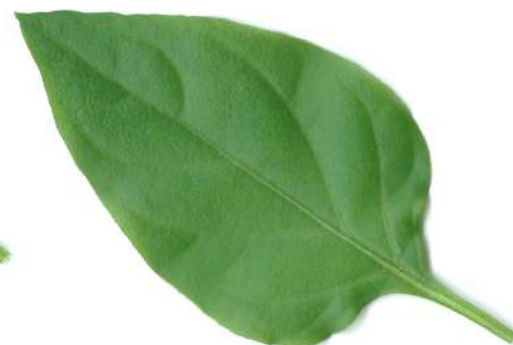

**11-6**

CTAMM

0 1 2 3 4 5 6 7 8 9 10 11 12 13 14 15

**11-9**

**11-8**

**11-7**

СТАНДАРТ

0 1 2 3 4 5 6 7 8 9 10 11 12 13 14 15



**11-12**

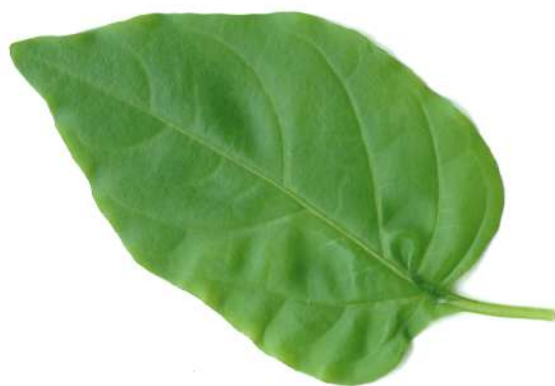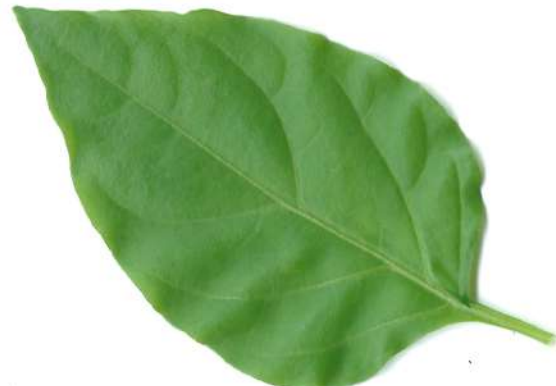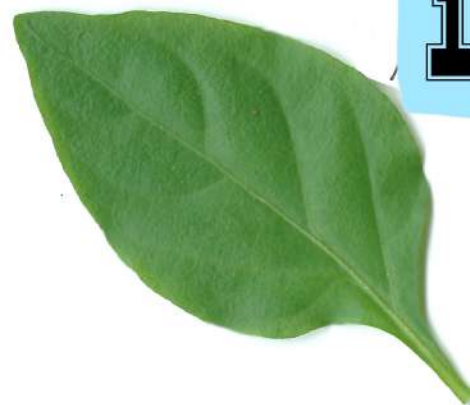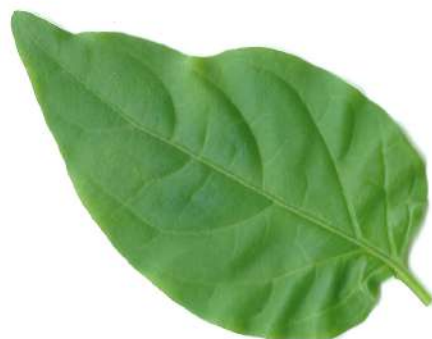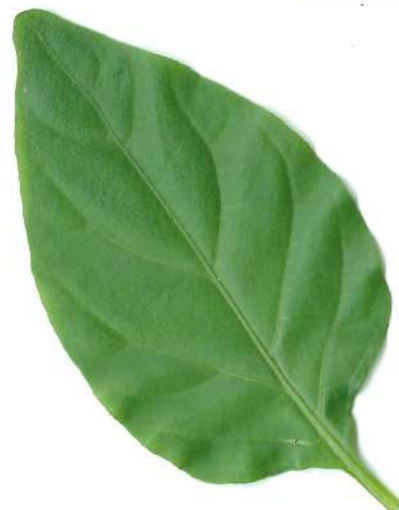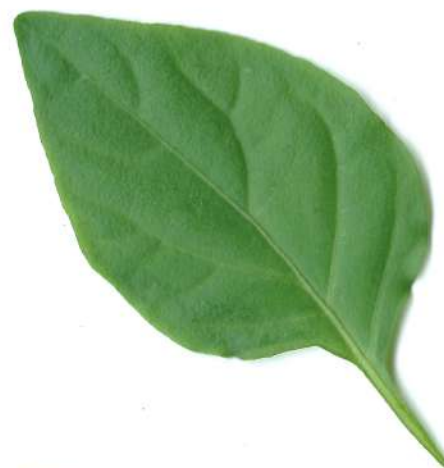

**11-11**

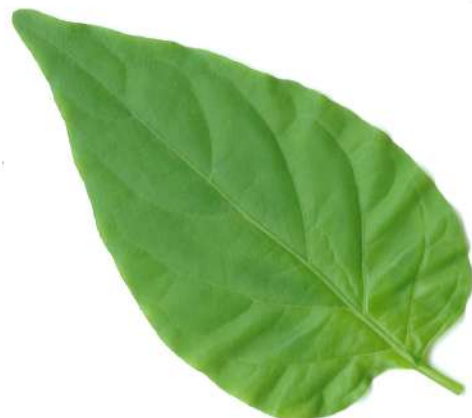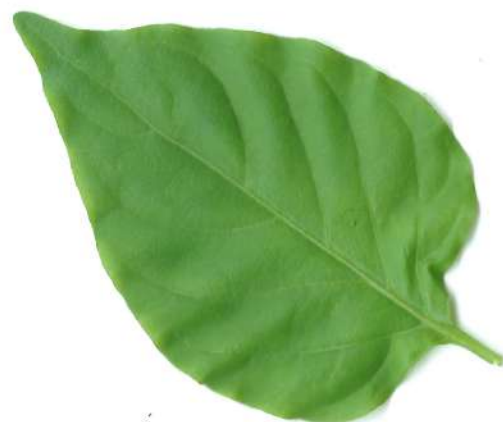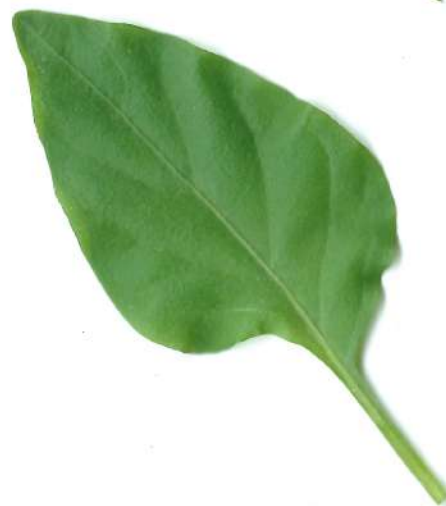

**11-10**

СТАН

0 1 2 3 4 5 6 7 8 9 10 11 12 13 14 15

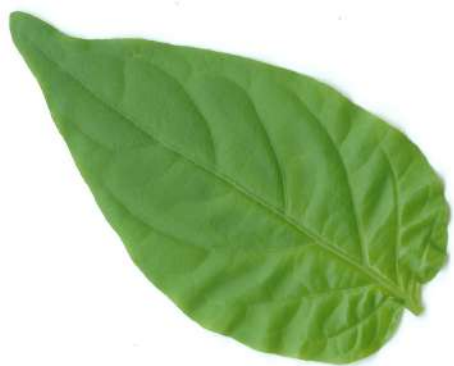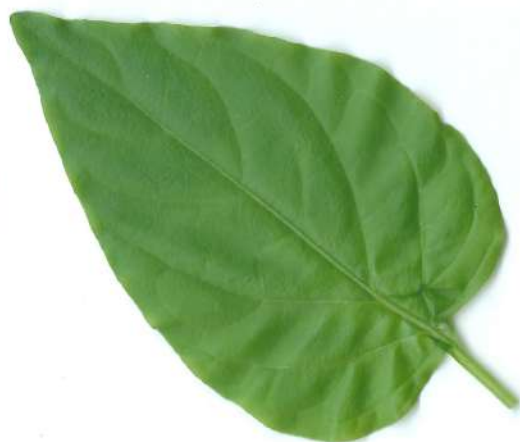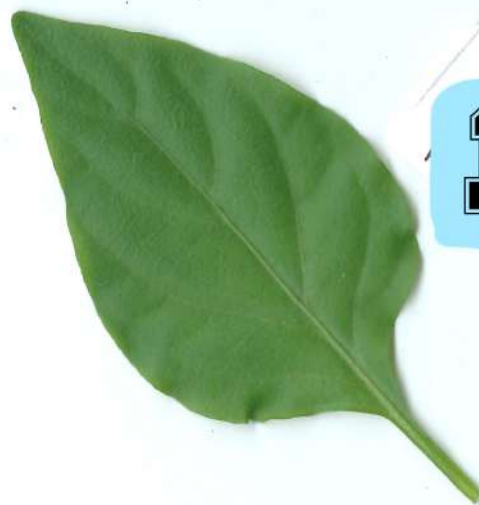

**11-14**

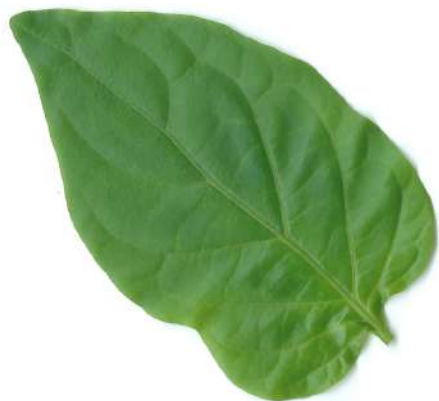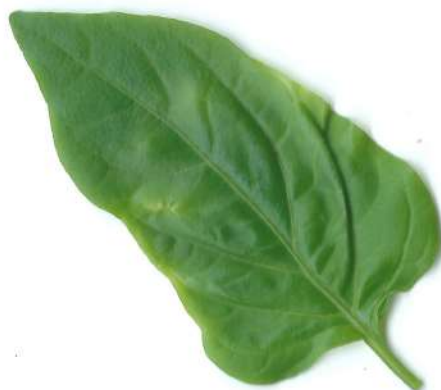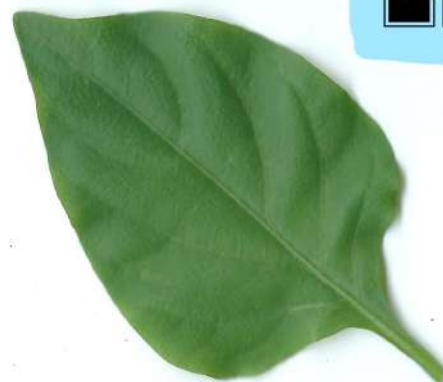

**11-13**

CTAMM

0 1 2 3 4 5 6 7 8 9 10 11 12 13 14 15

0 1 2 3 4 5 6 7 8 9 10 11 12 13 14 15

СТАНДАРТ

12-1

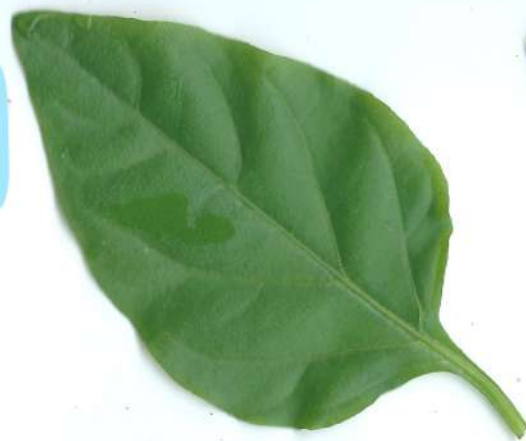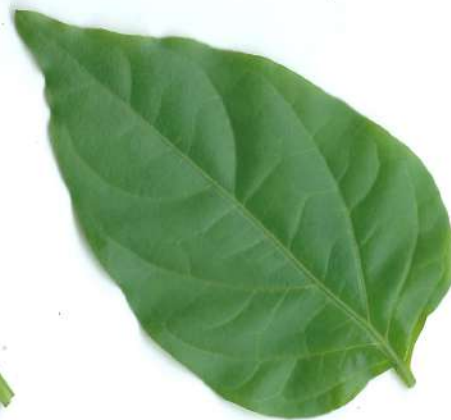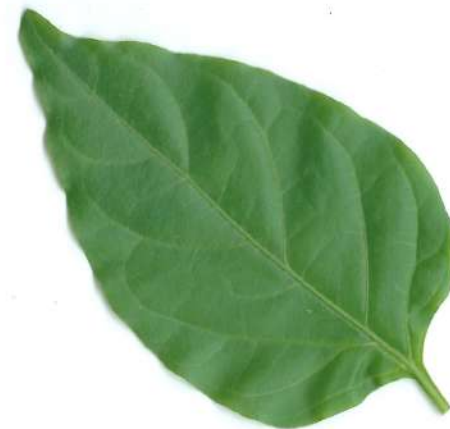

12-2

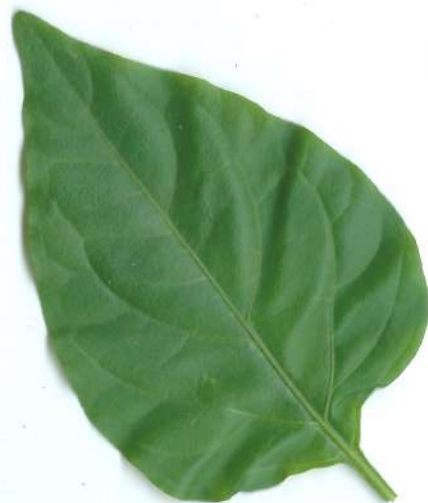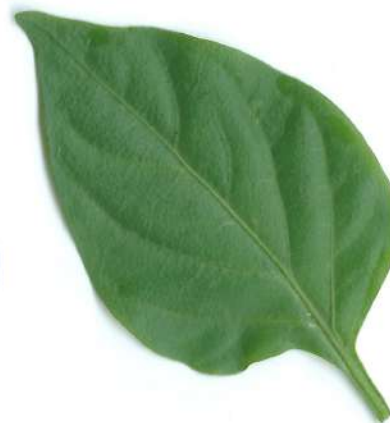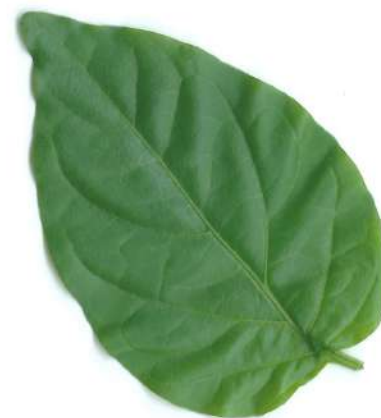

12-3

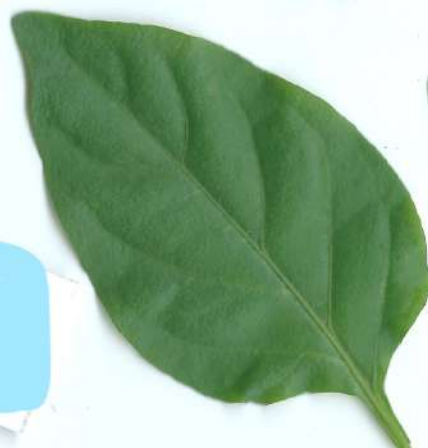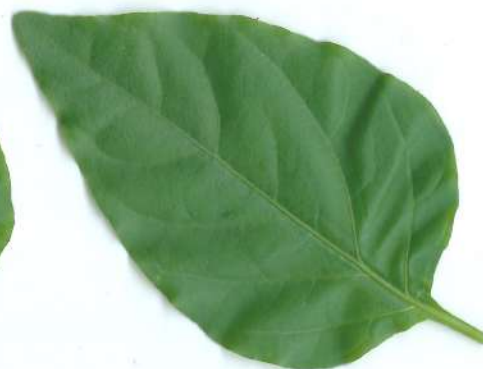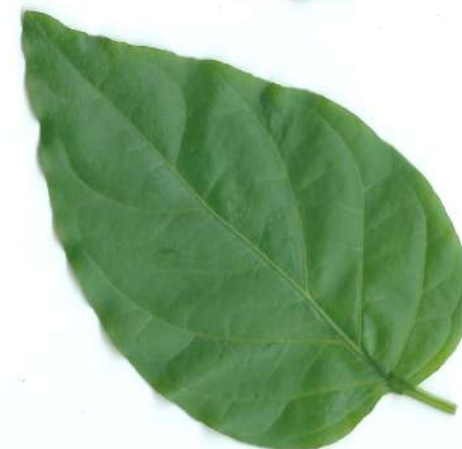



**12-4**

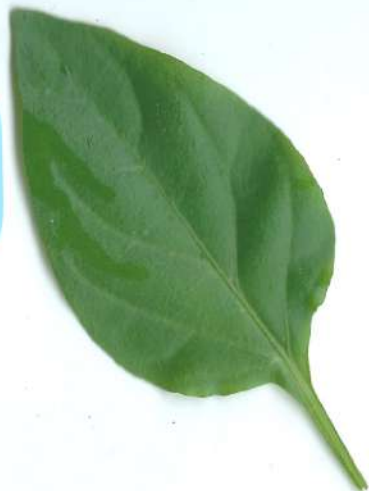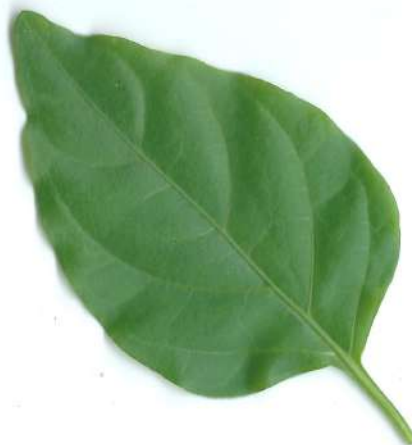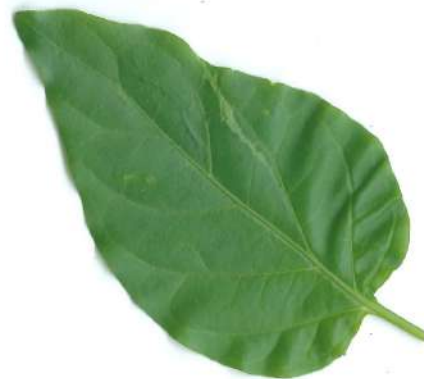

**12-5**

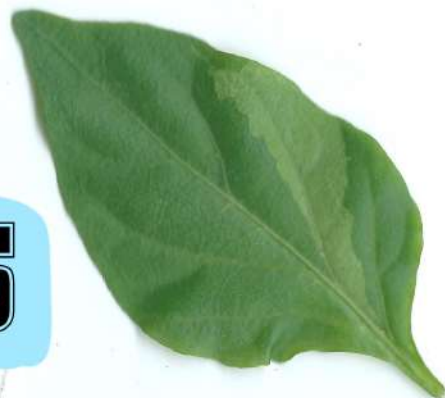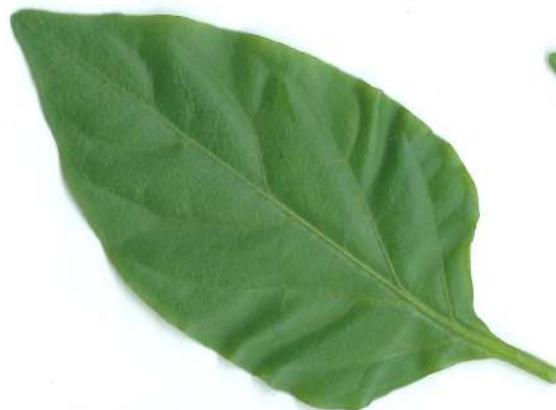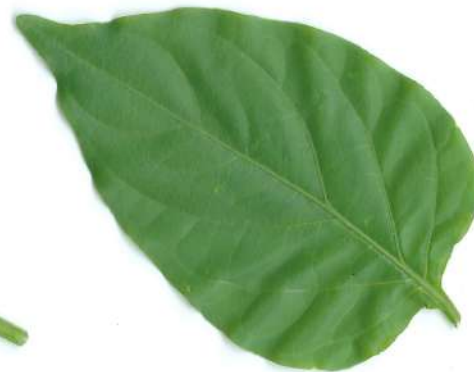

**12-6**

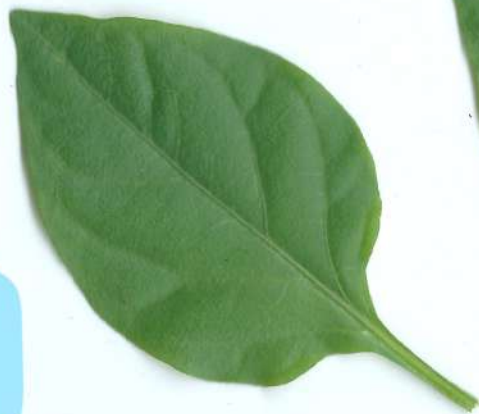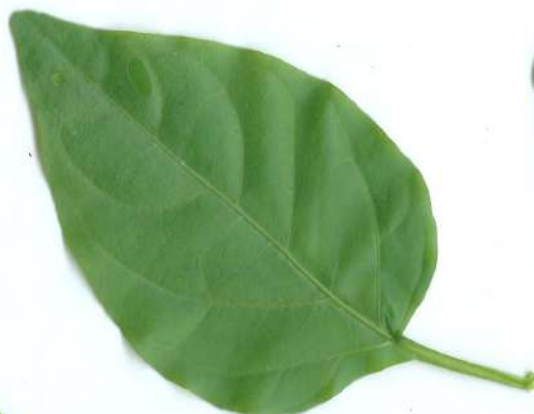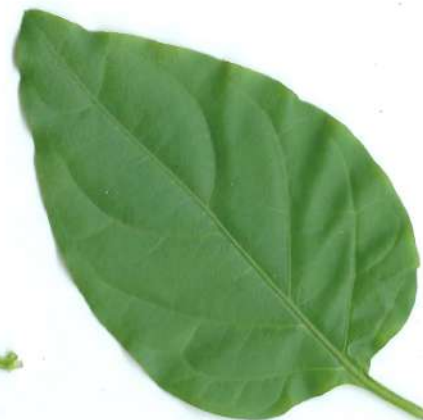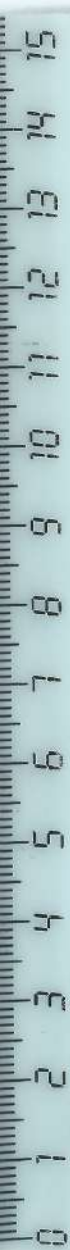

СТАНД

**12-7**

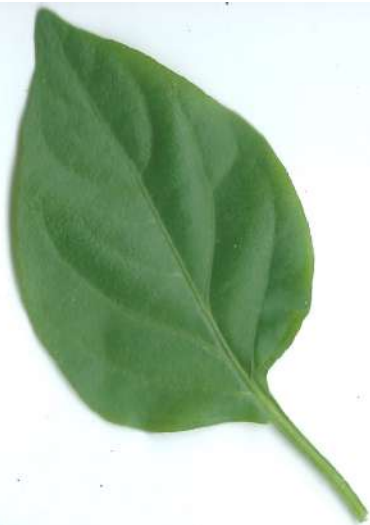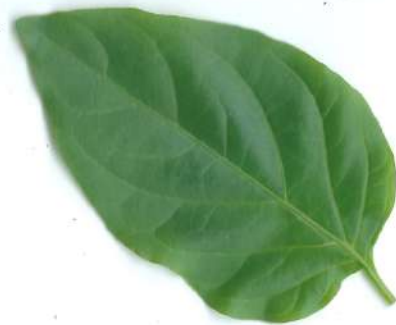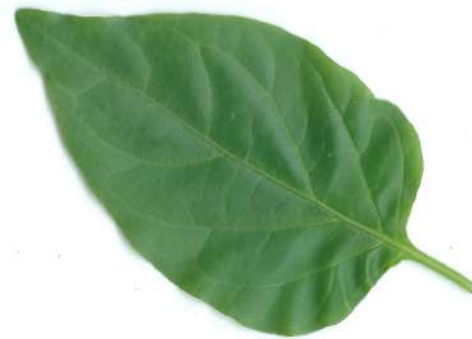

**12-8**

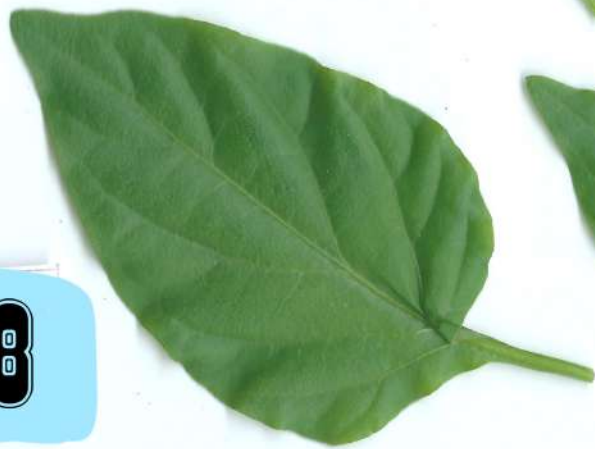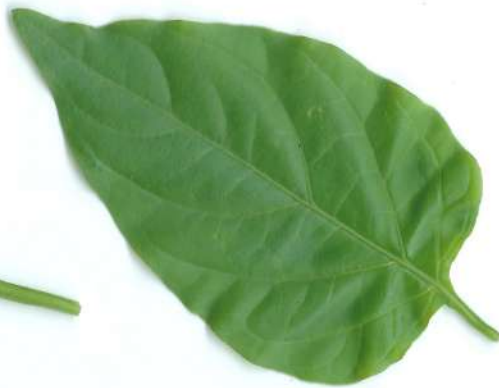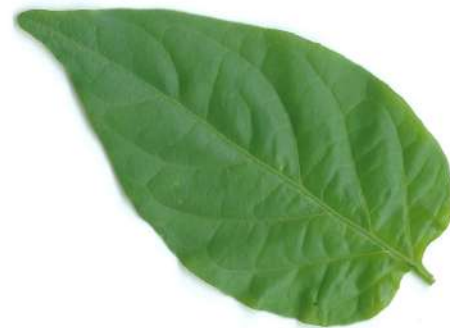

**12-9**

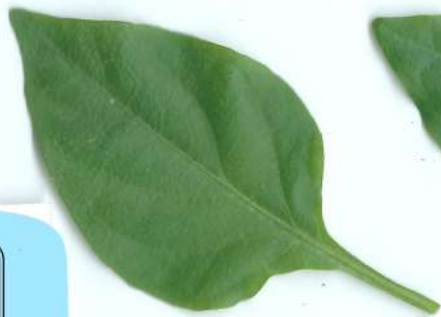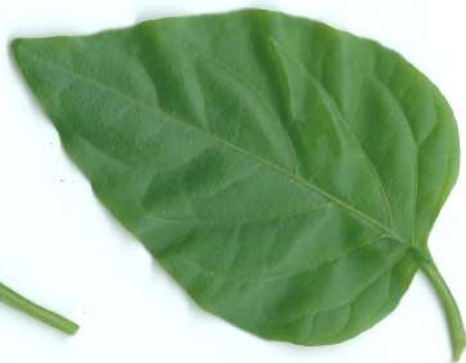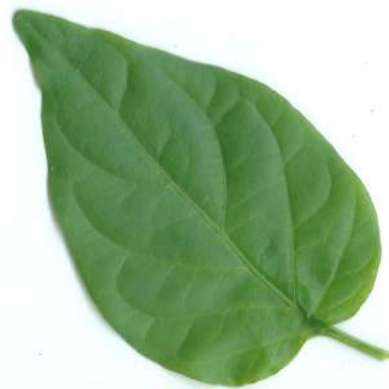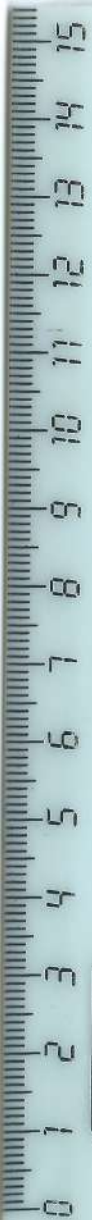

СТАНД



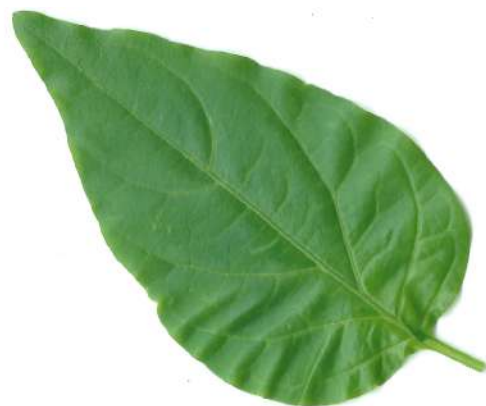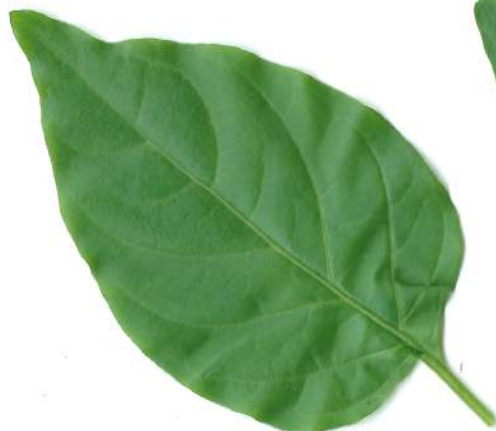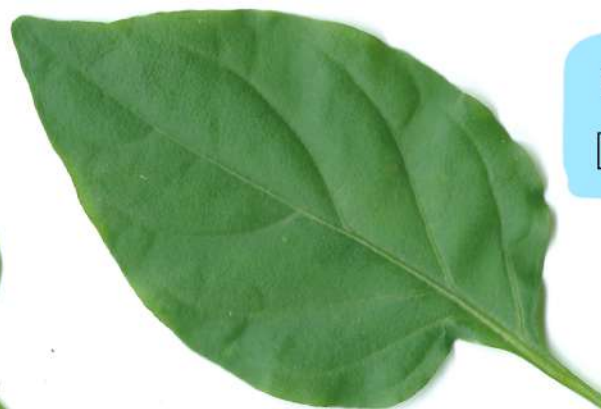

**12-12**

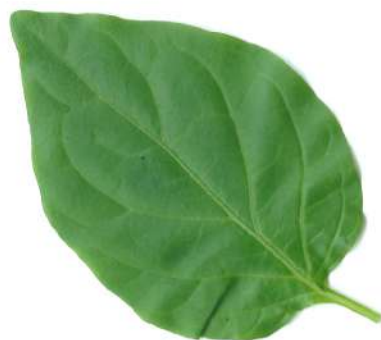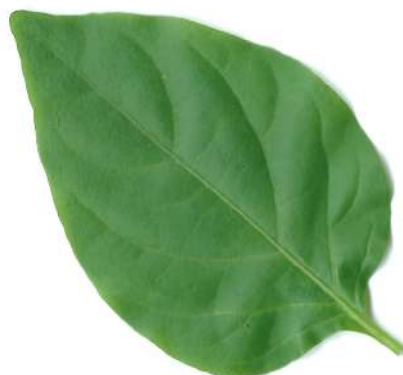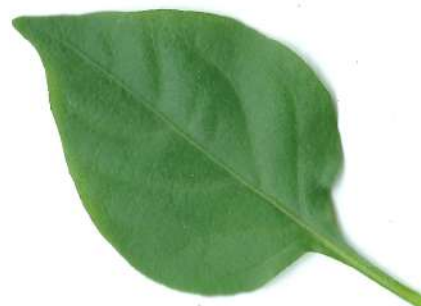

**12-11**

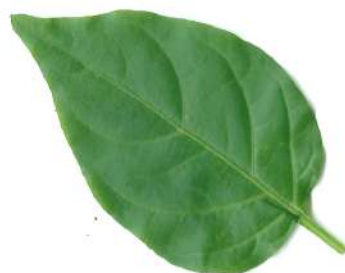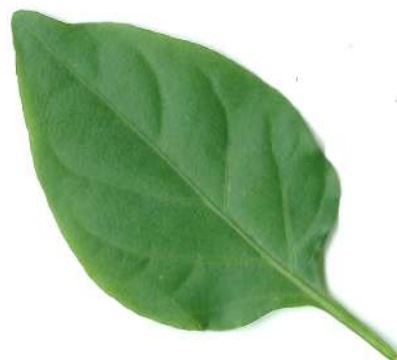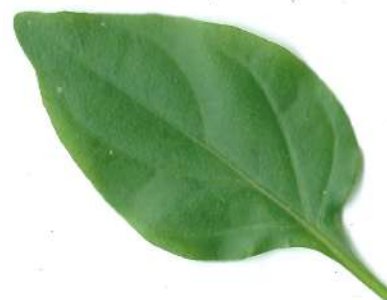

**12-10**

СТАНДАРТ

0 1 2 3 4 5 6 7 8 9 10 11 12 13 14 15

**12-15**

**12-14**

**12-13**

СТАНДАРТ

0 1 2 3 4 5 6 7 8 9 10 11 12 13 14 15



0 1 2 3 4 5 6 7 8 9 10 11 12 13 14 15

15 CM

14-15

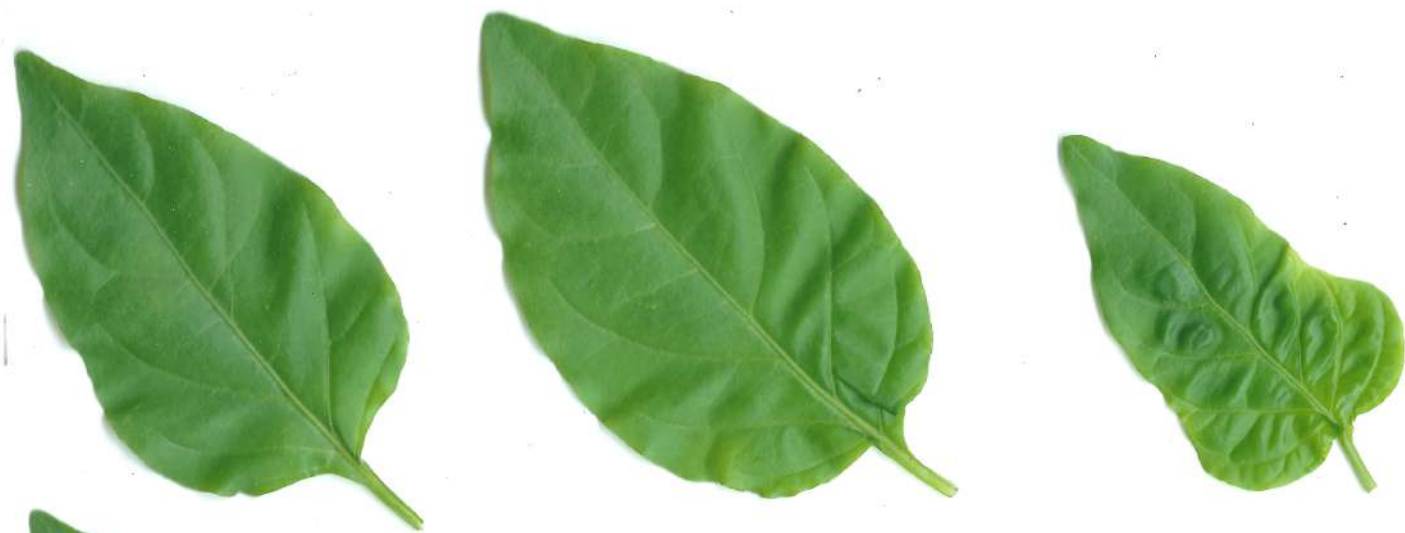

14-14

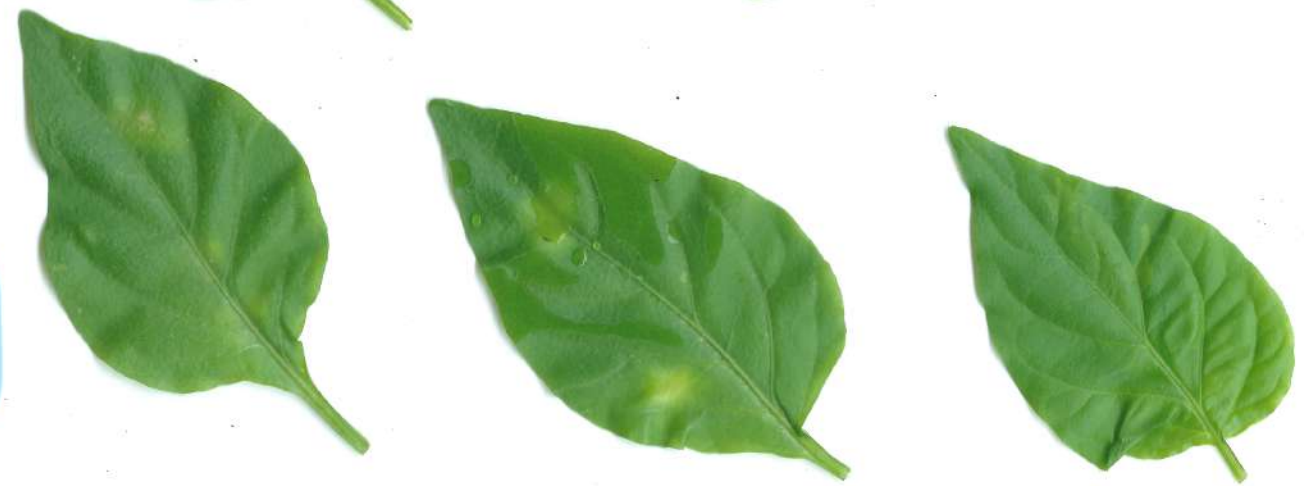

14-13

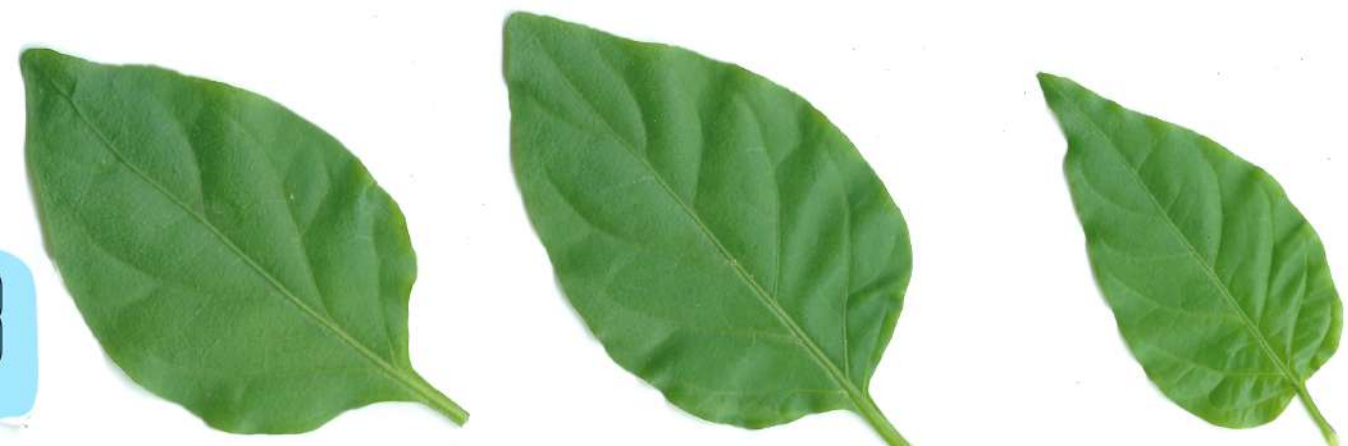

**13-4**

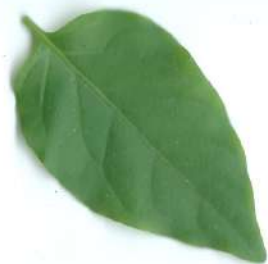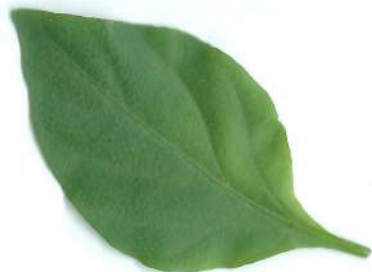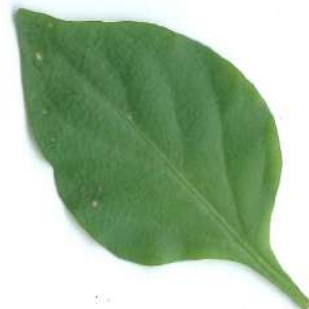

**13-5**

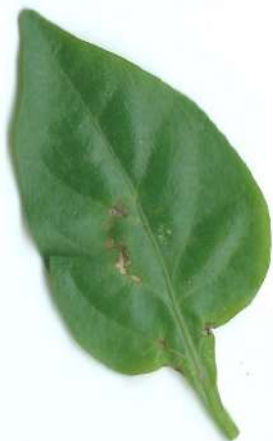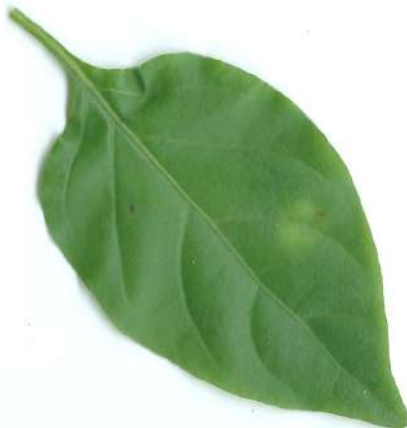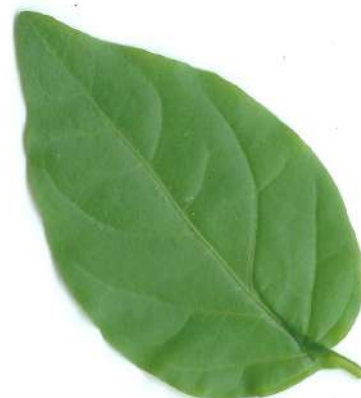

**13-6**

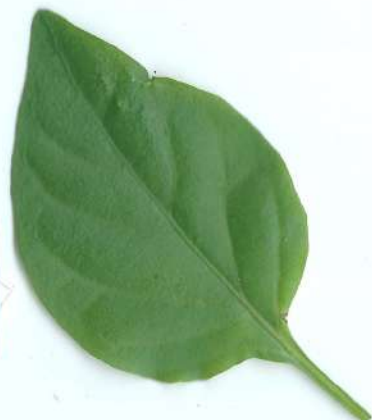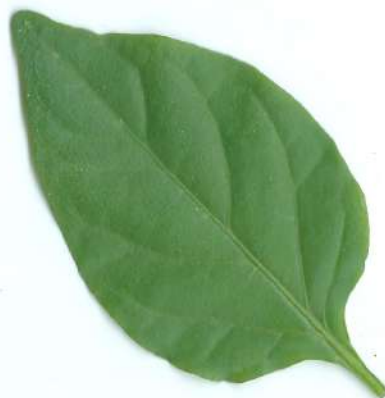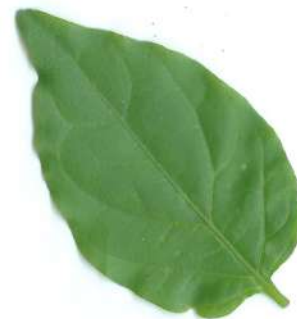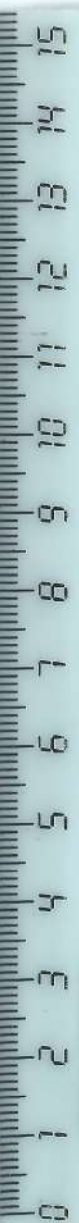

CTAMM

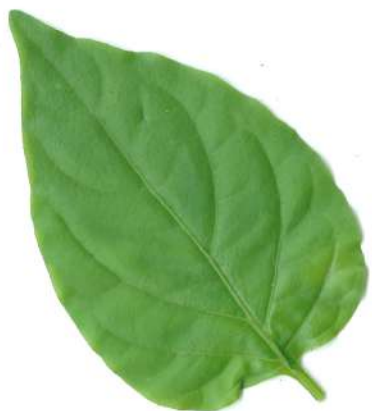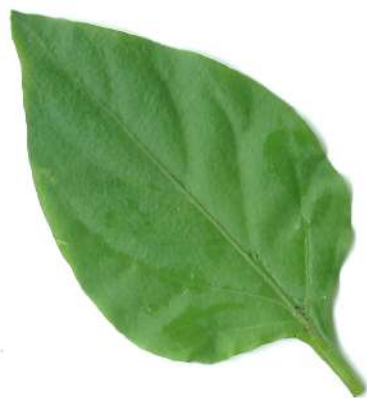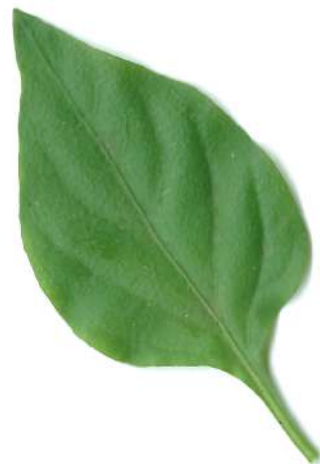

**13-9**

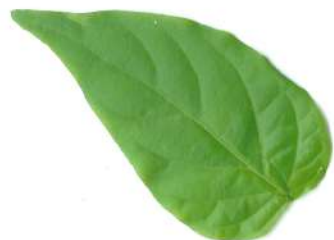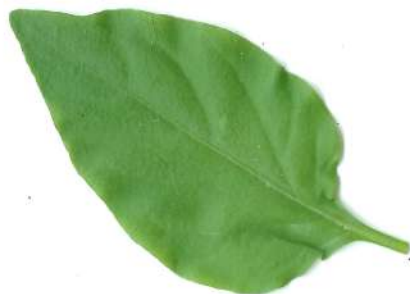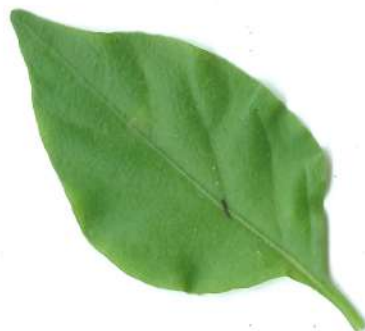

**13-8**

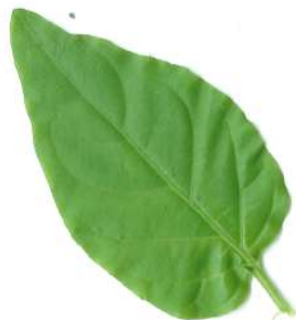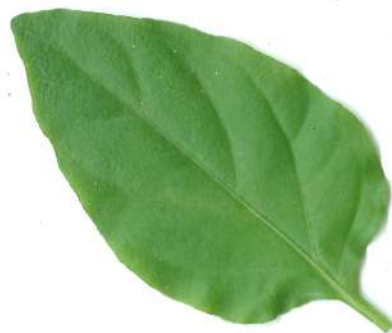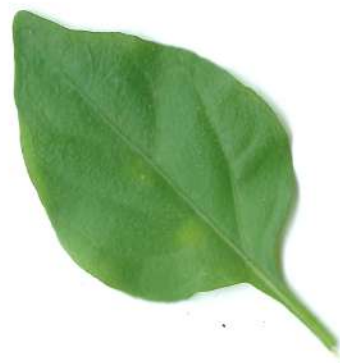

**13-7**

СТАНДАРТ

0 1 2 3 4 5 6 7 8 9 10 11 12 13 14 15



**13-10**

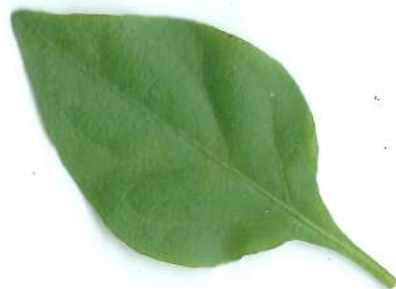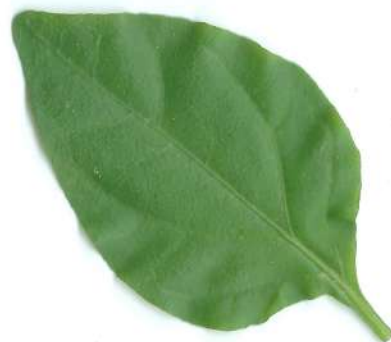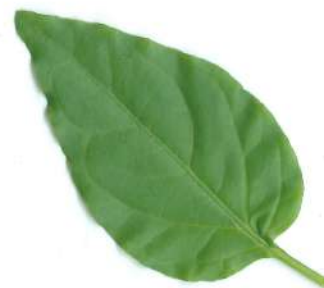

**13-11**

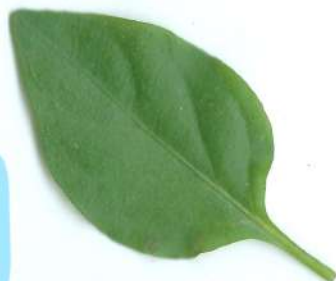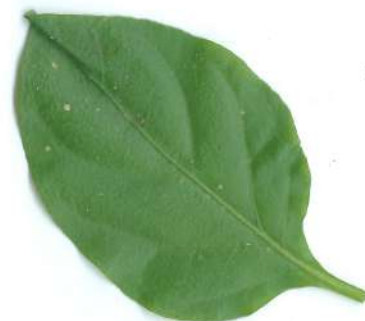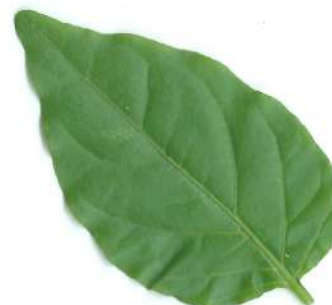

**13-12**

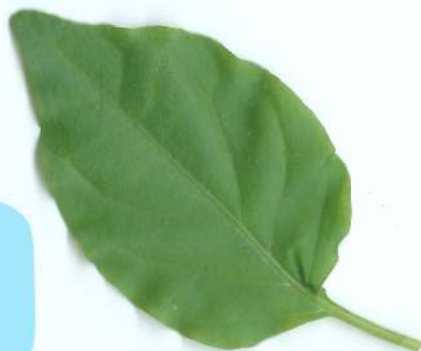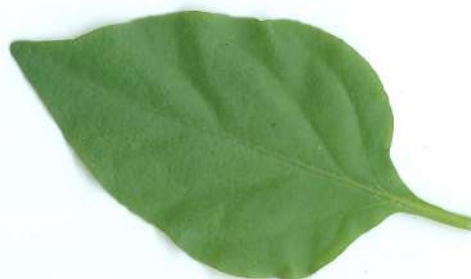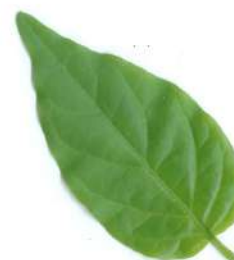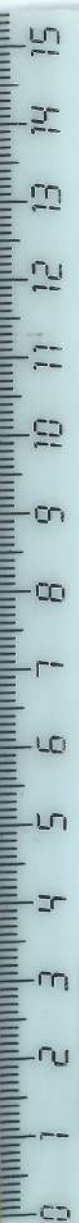

СТАНД

0 1 2 3 4 5 6 7 8 9 10 11 12 13 14 15

СТАНД

13-13

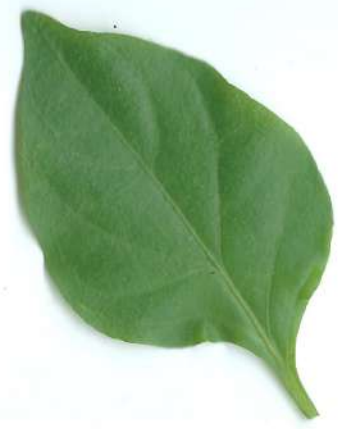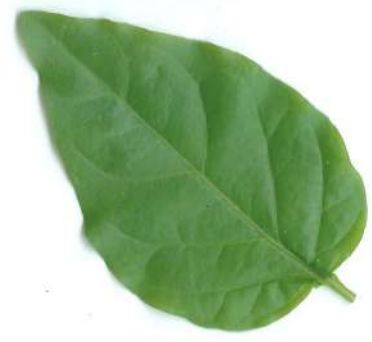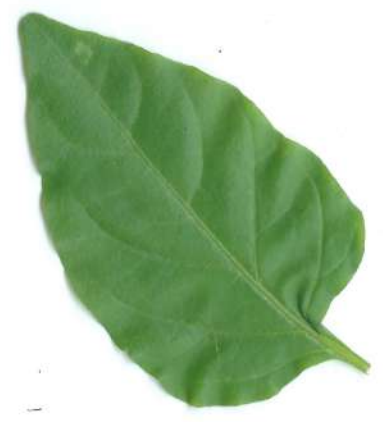

13-14

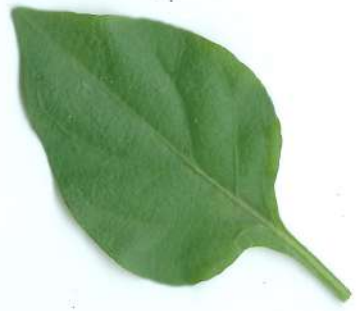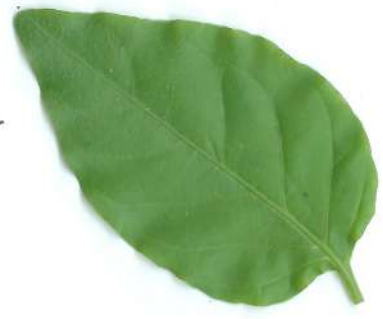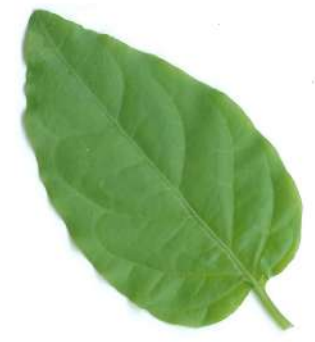

13-15

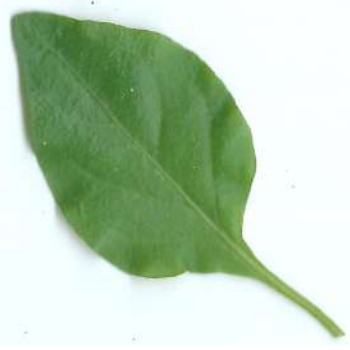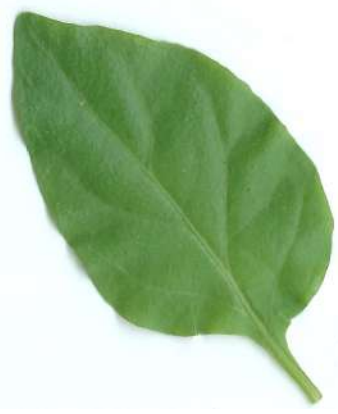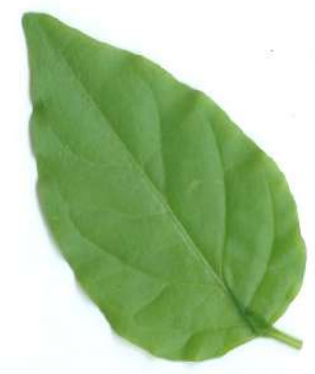

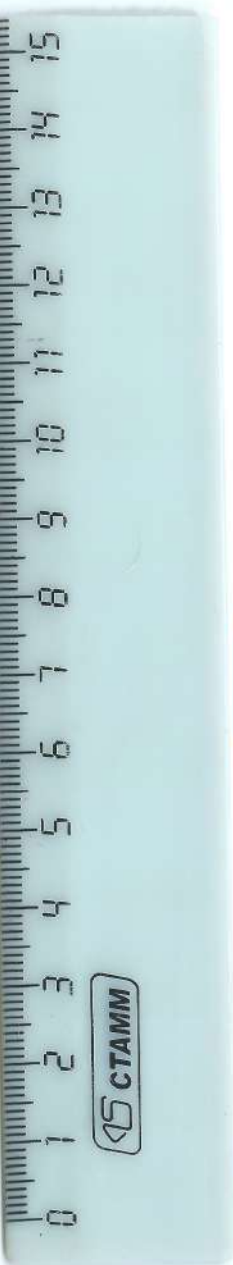

**14-12**

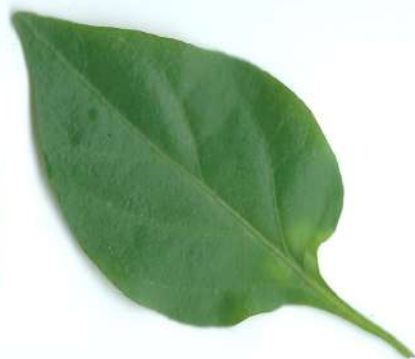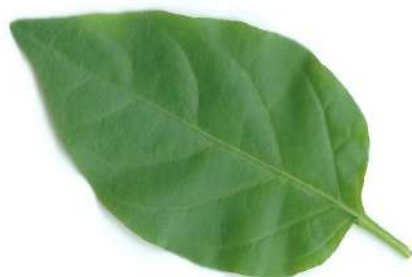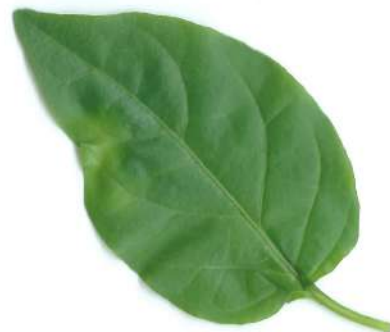

**14-11**

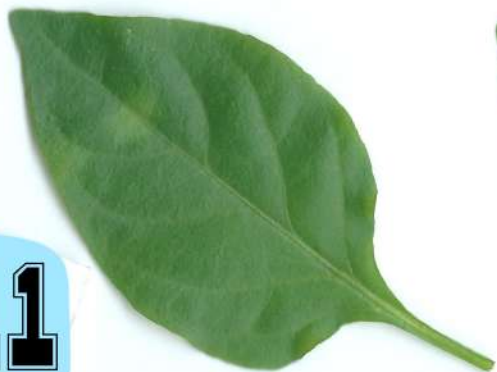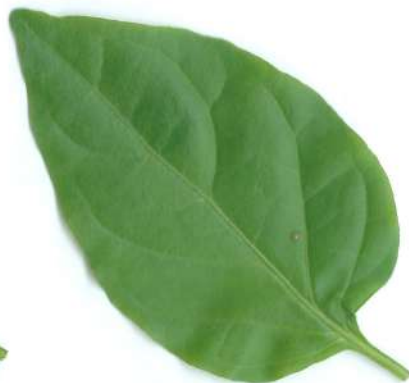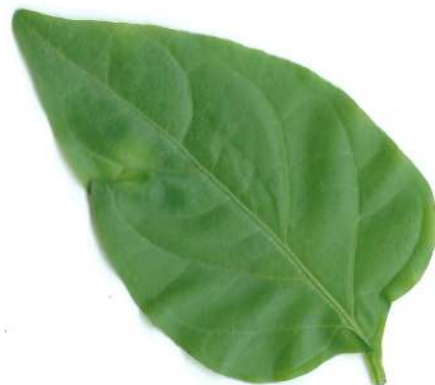

**14-10**

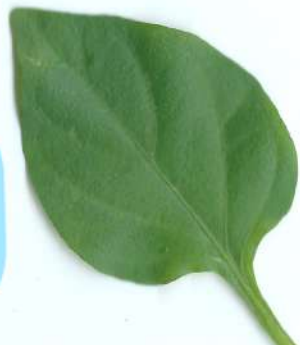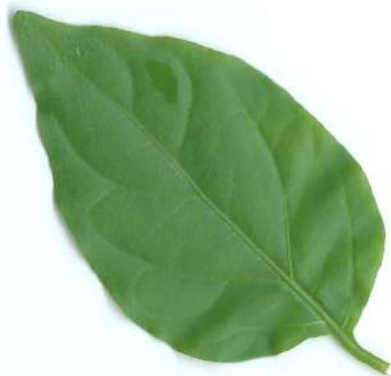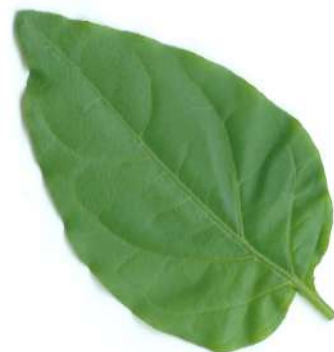



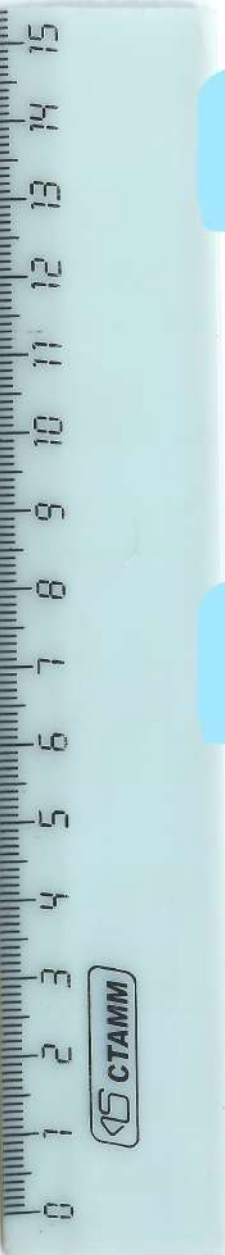

**14-9**

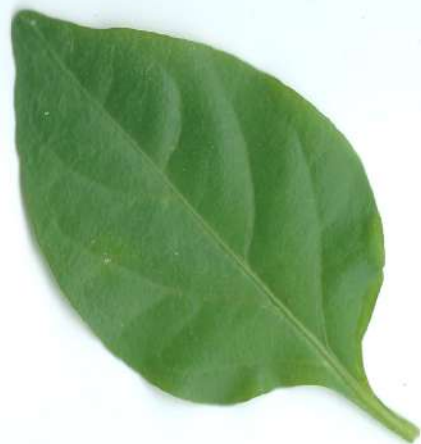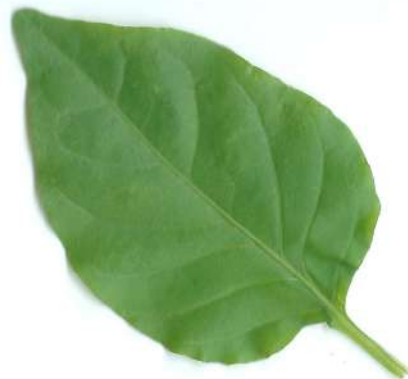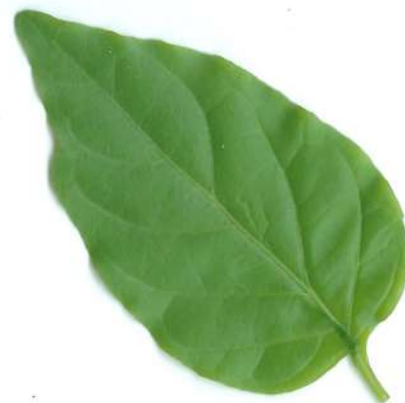

**14-8**

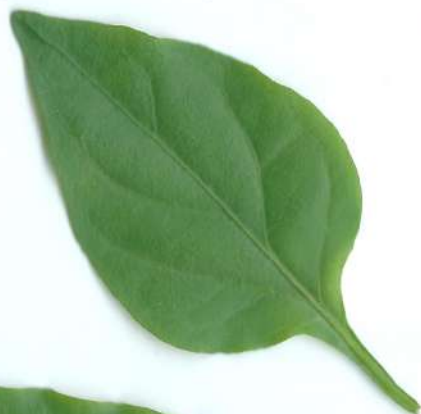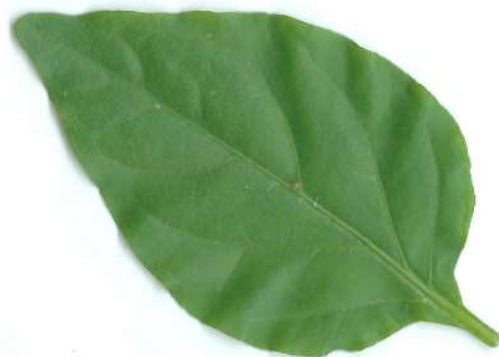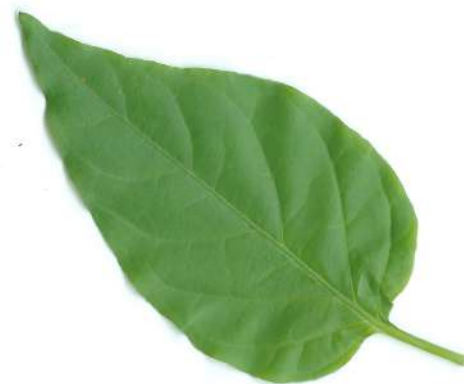

**14-7**

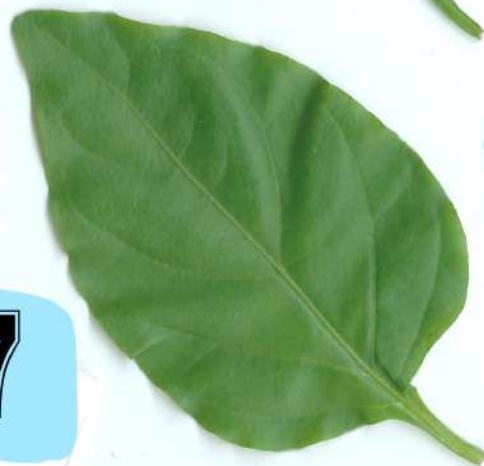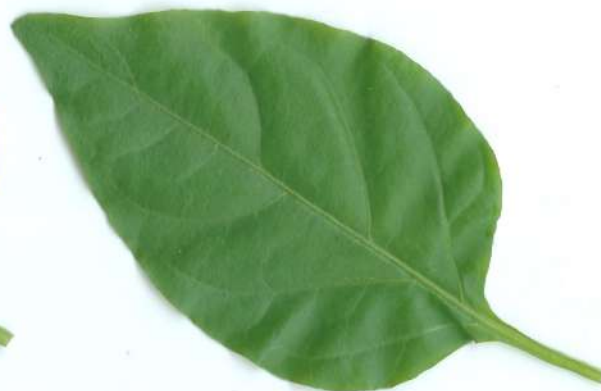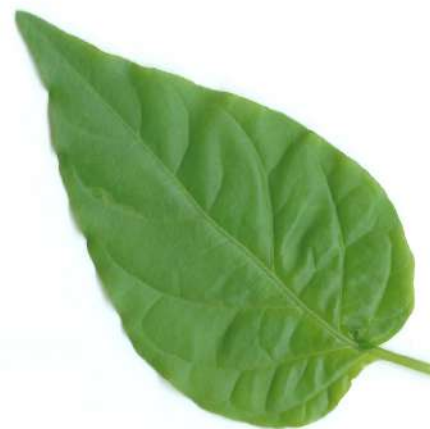

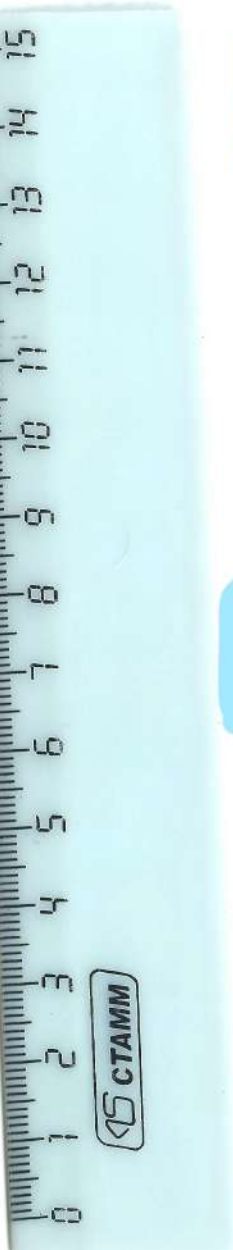

**14-6**

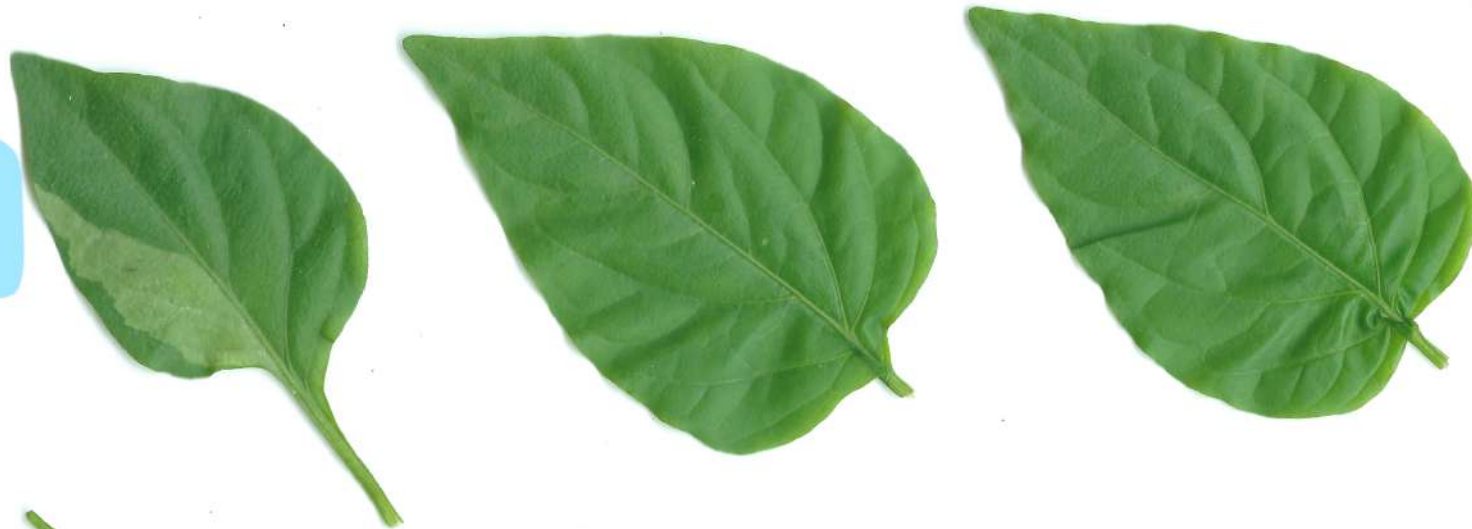

**14-5**

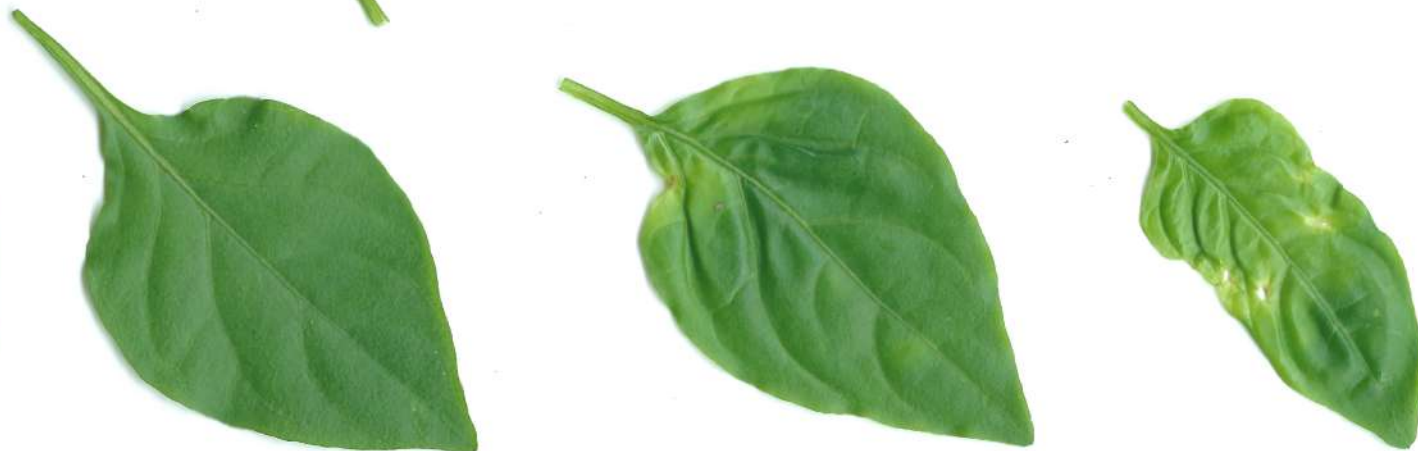

**14-4**

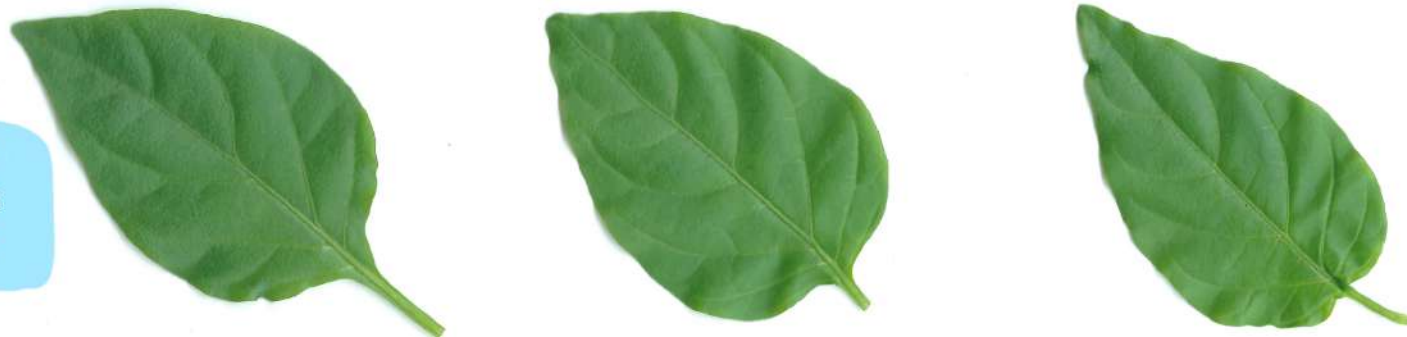



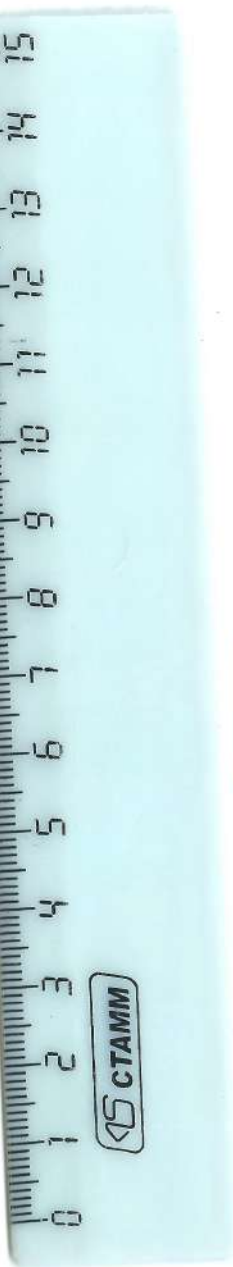

**14-3**

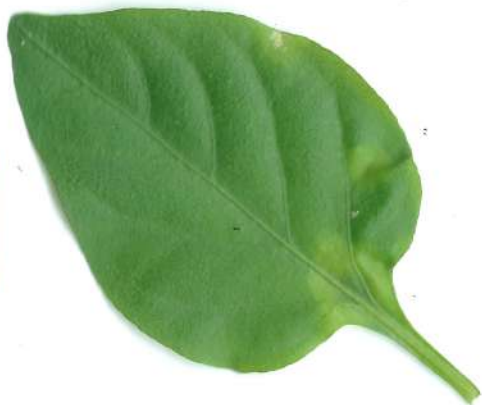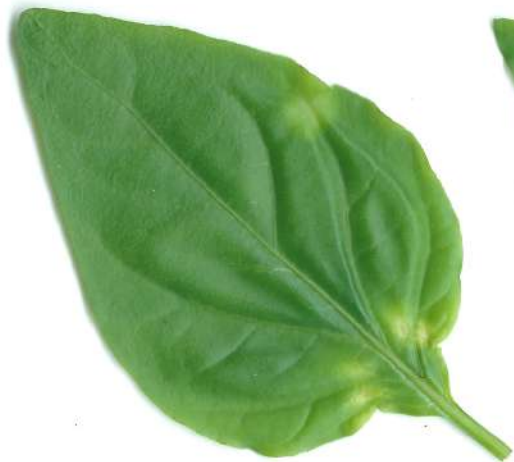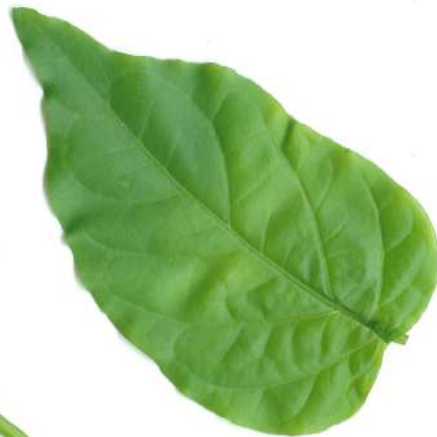

**14-2**

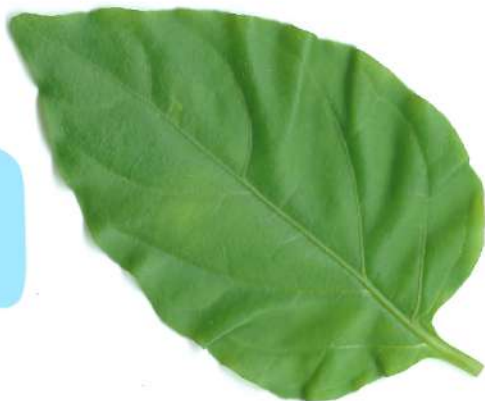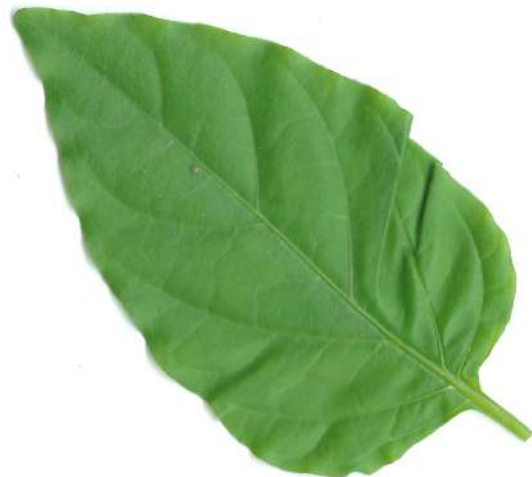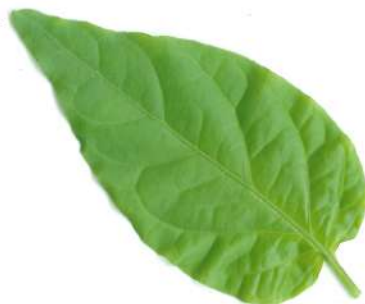

**14-1**

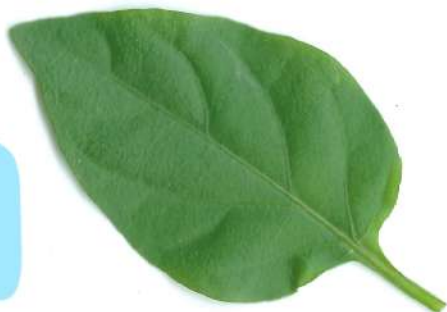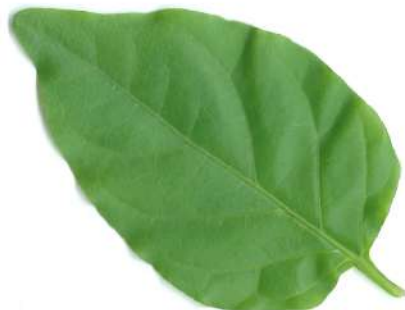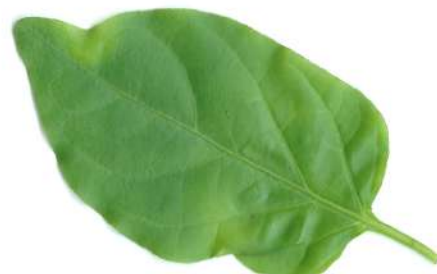

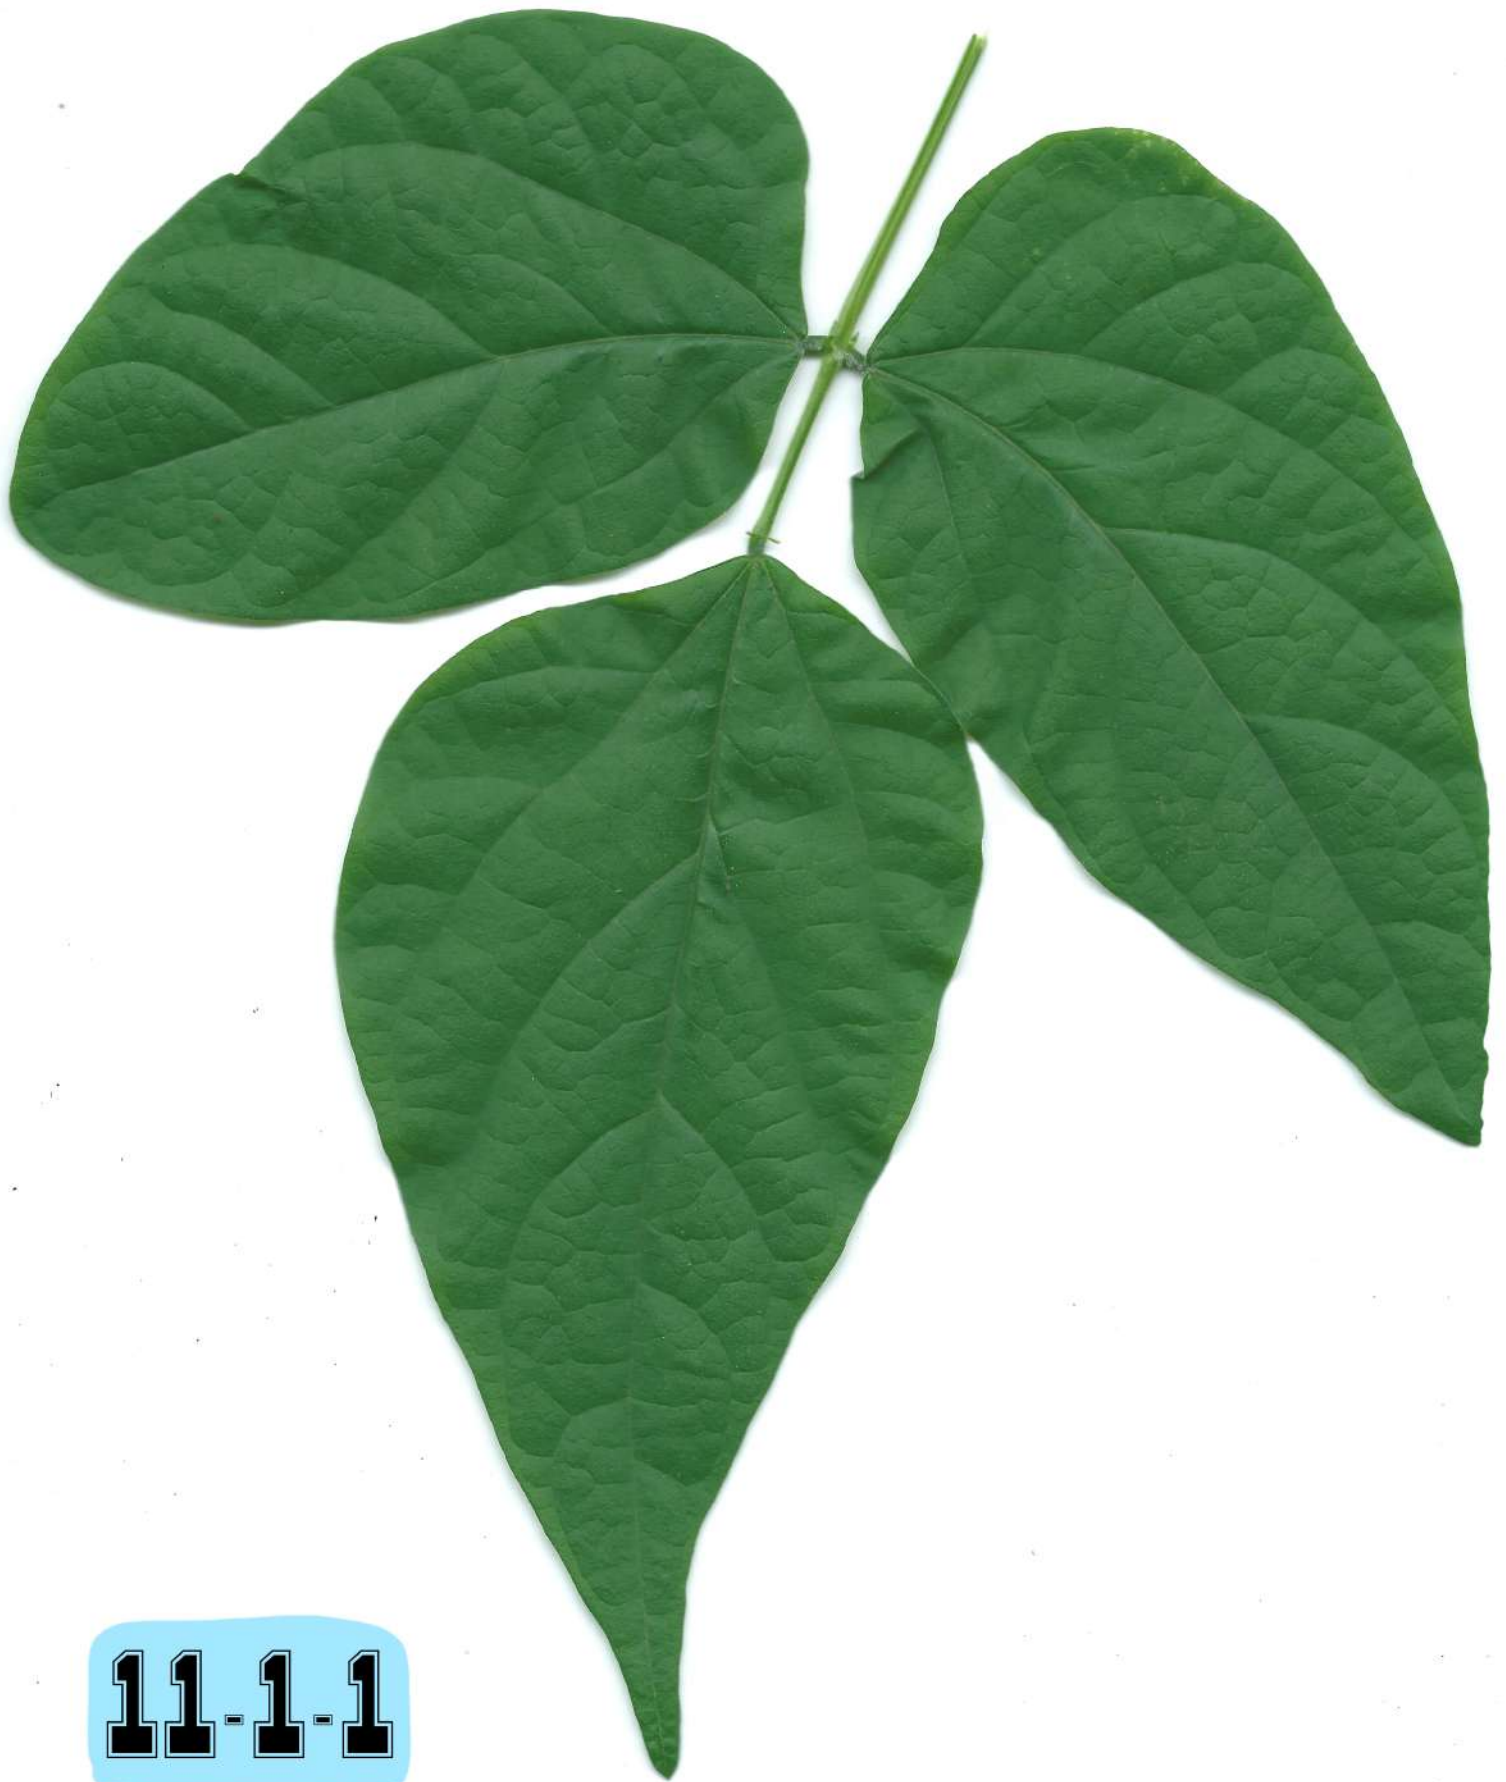

11-1-1

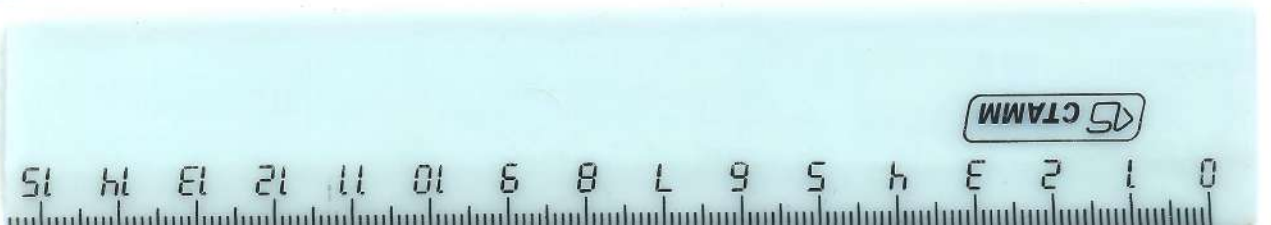



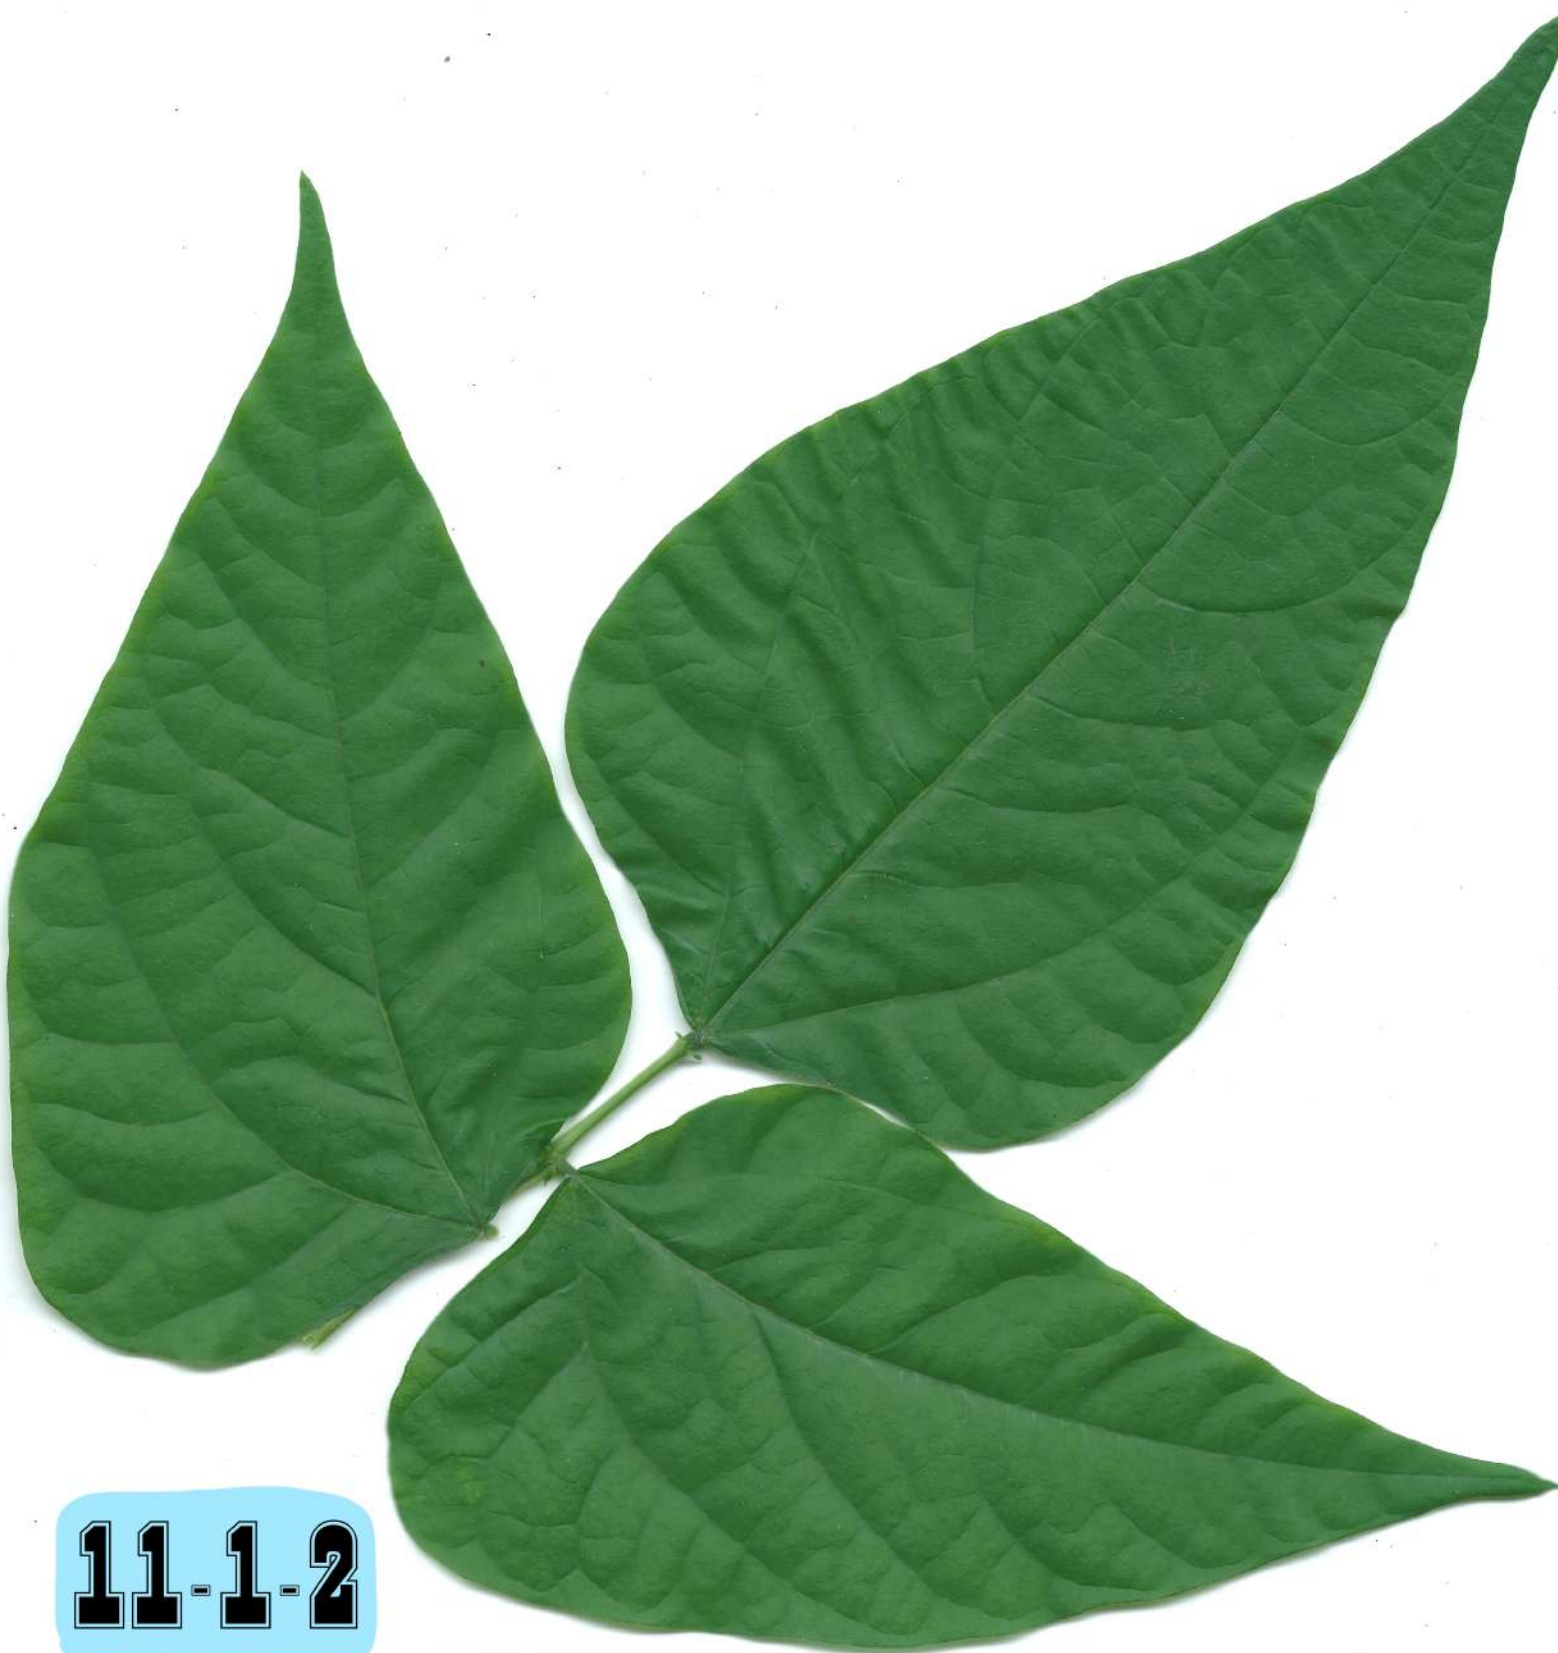

**11-1-2**

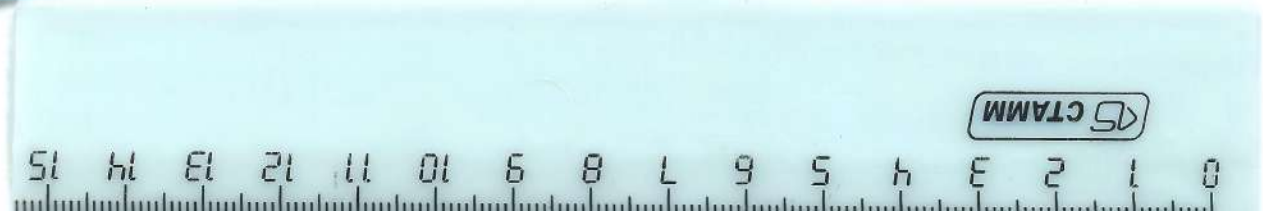

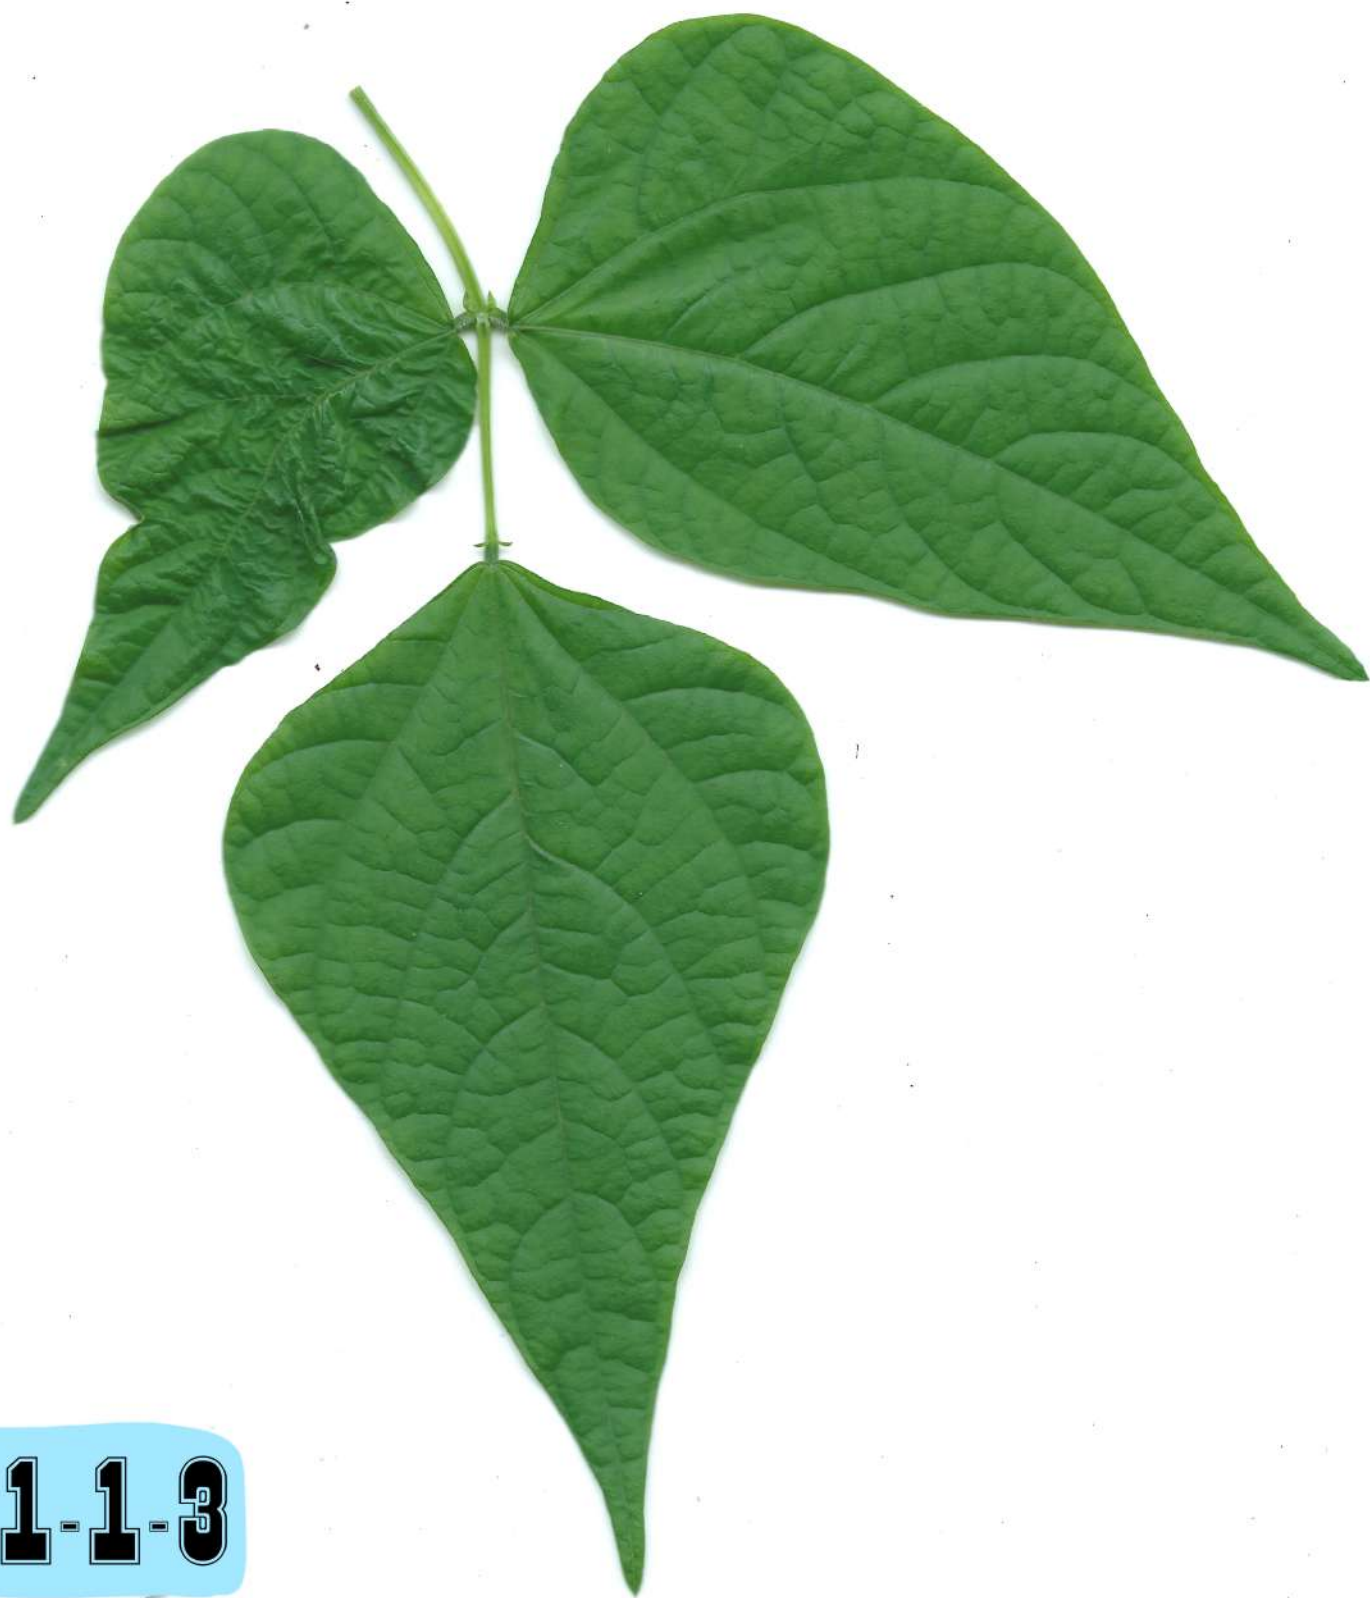

**11-1-3**

dp

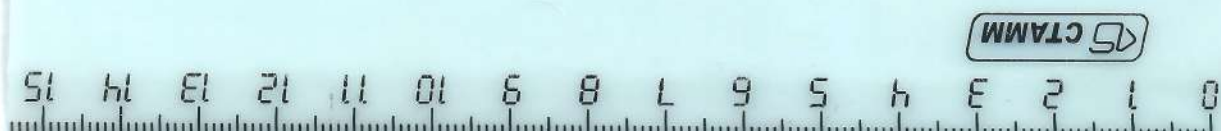



**11-2-1**

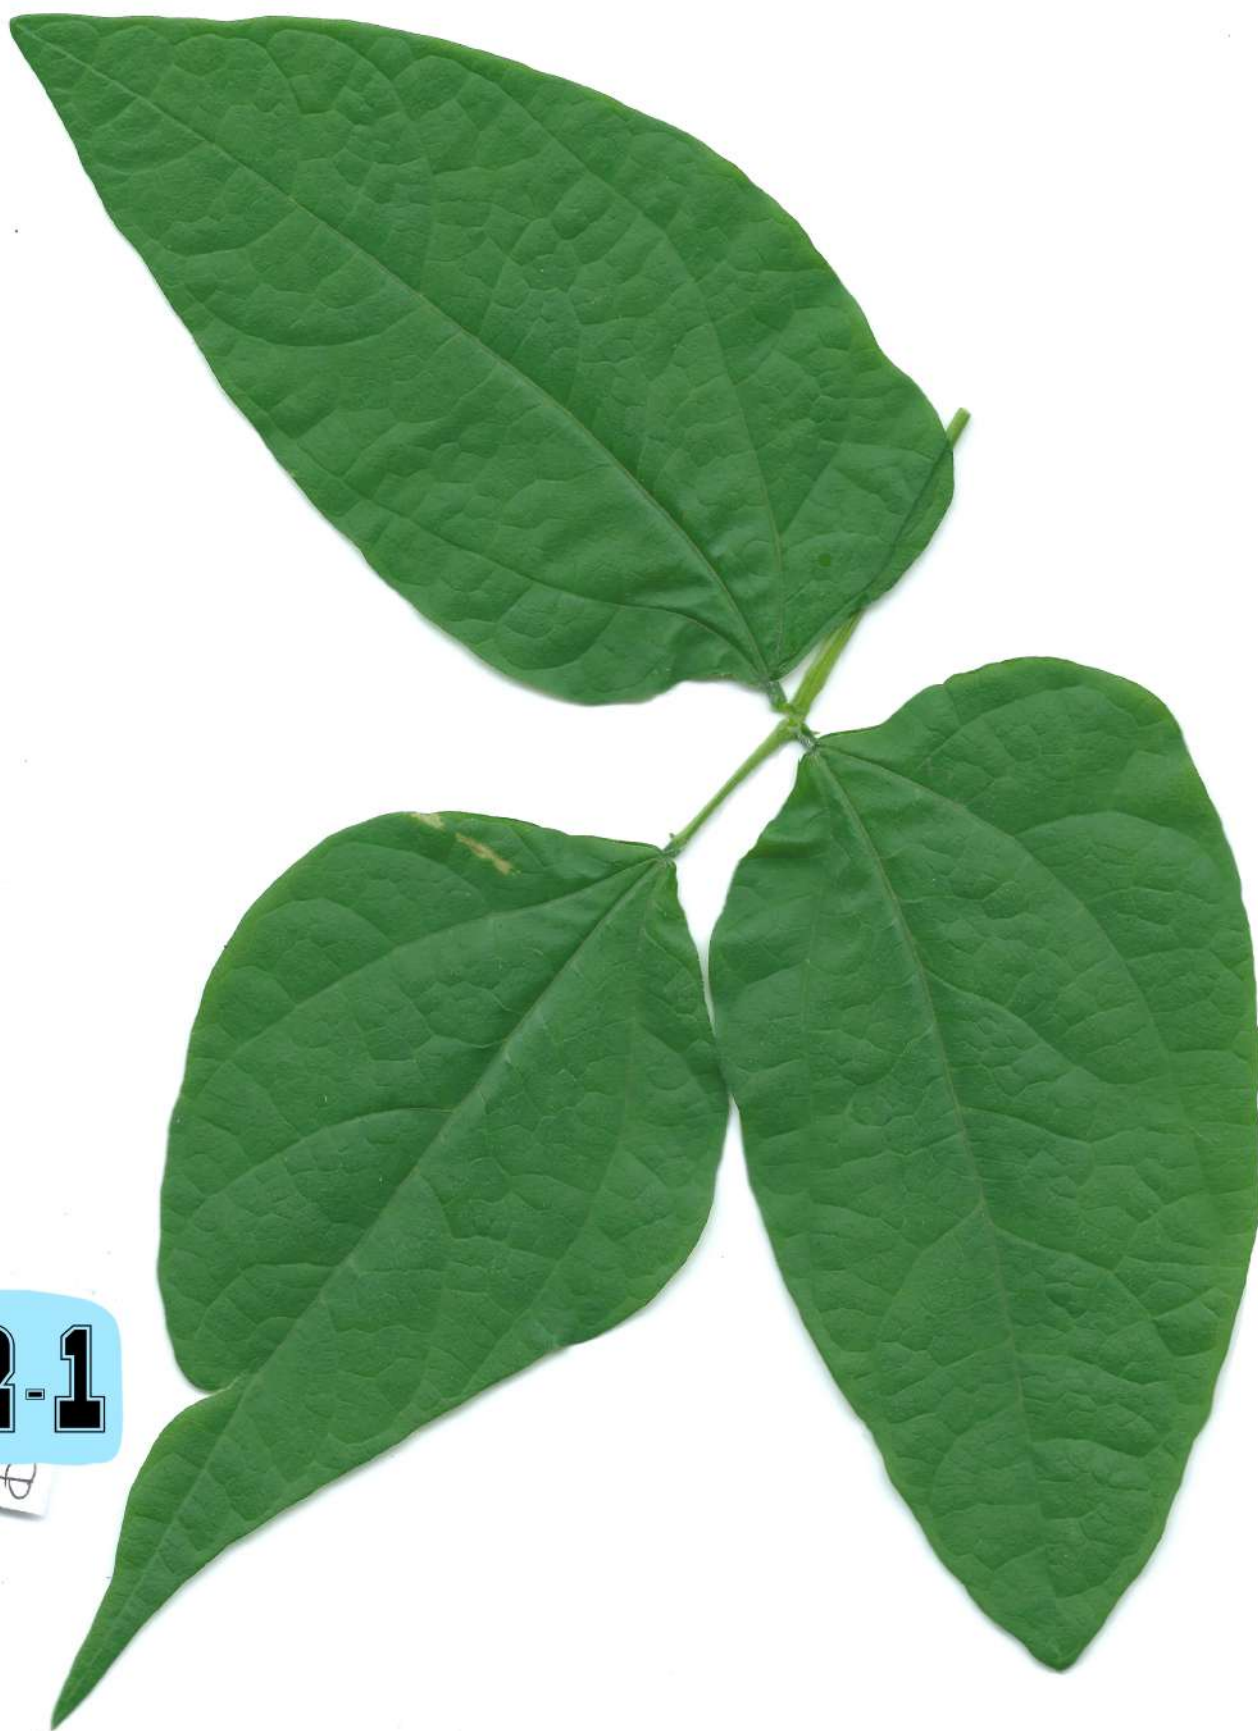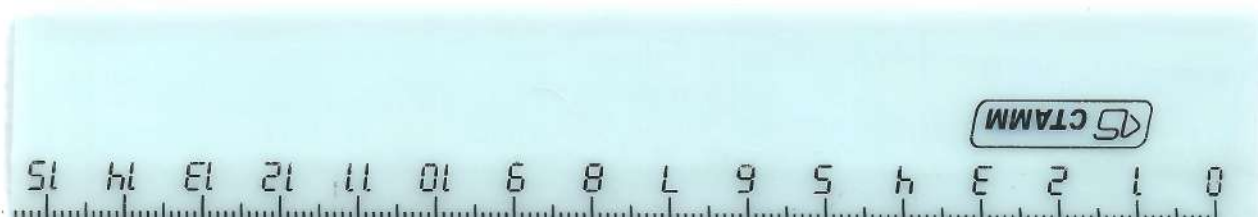

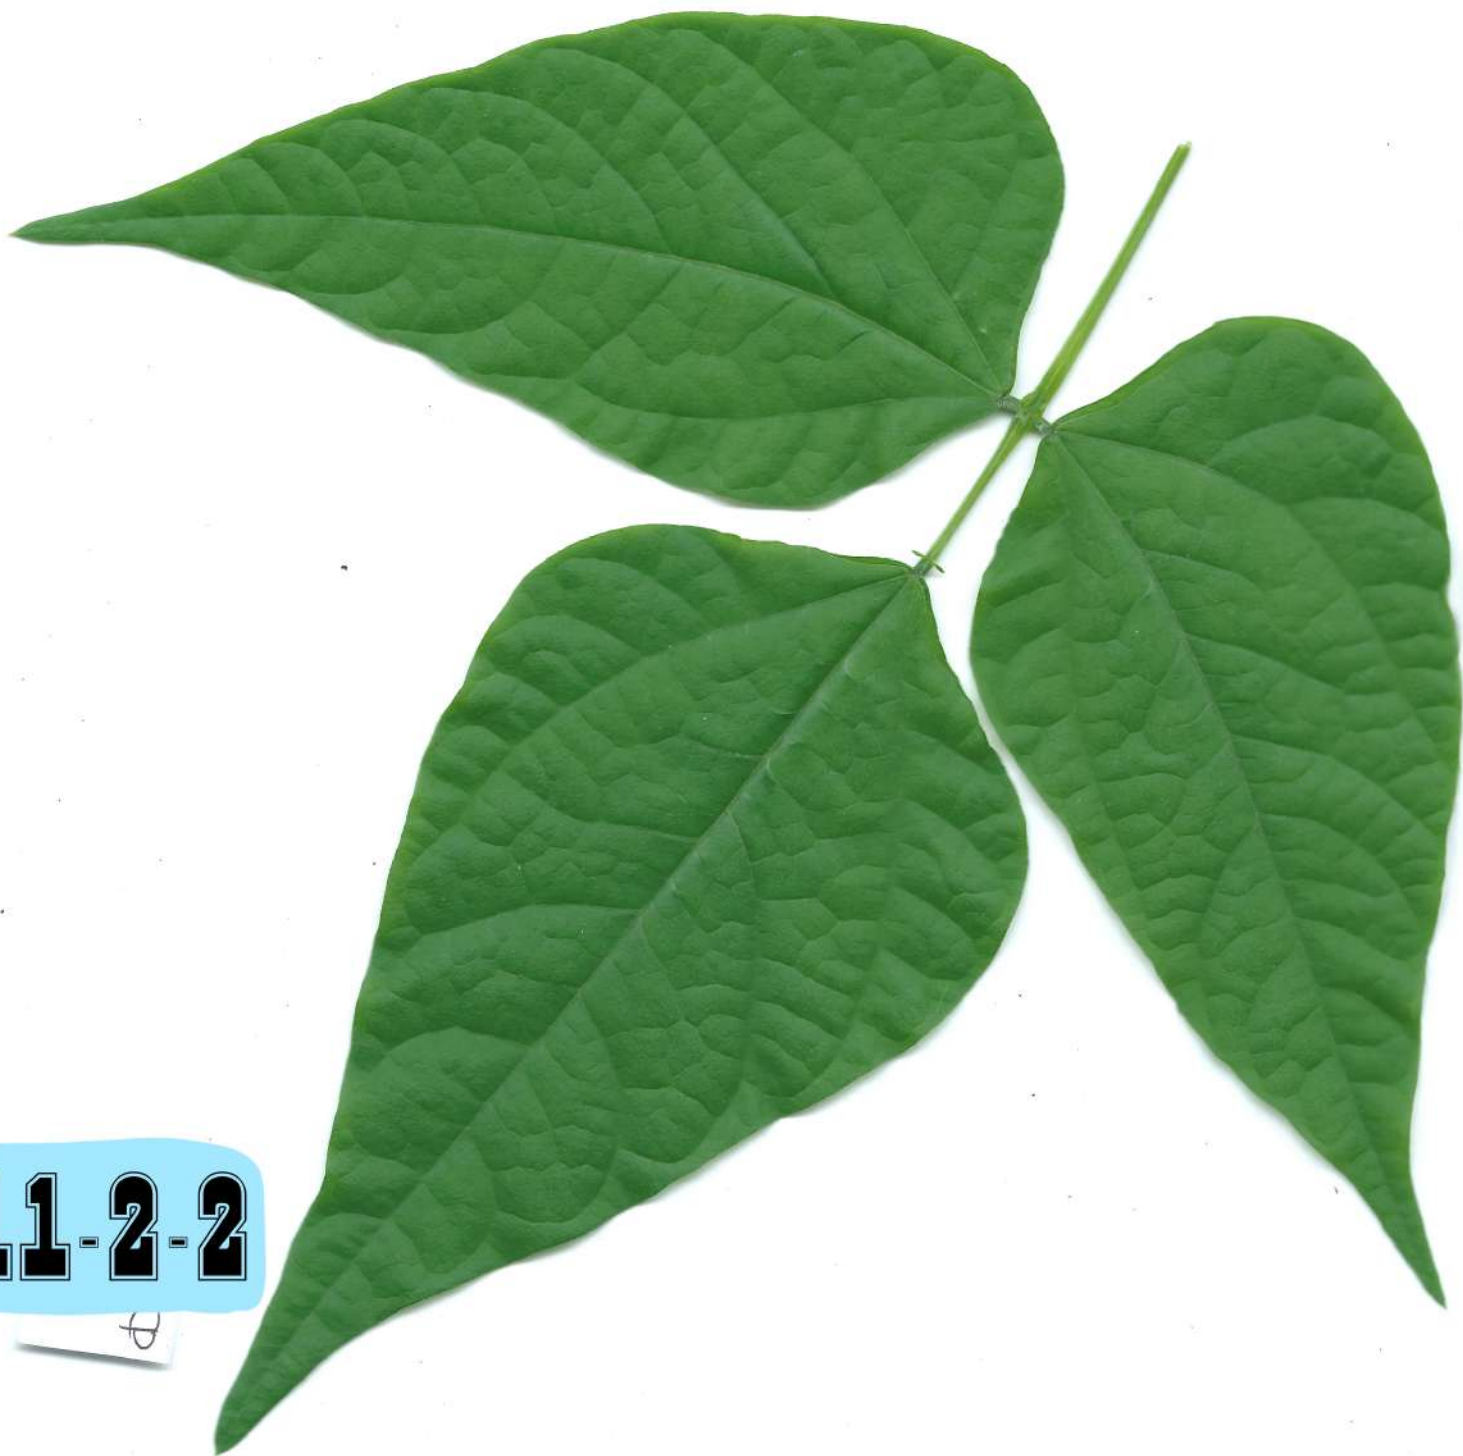

11-2-2

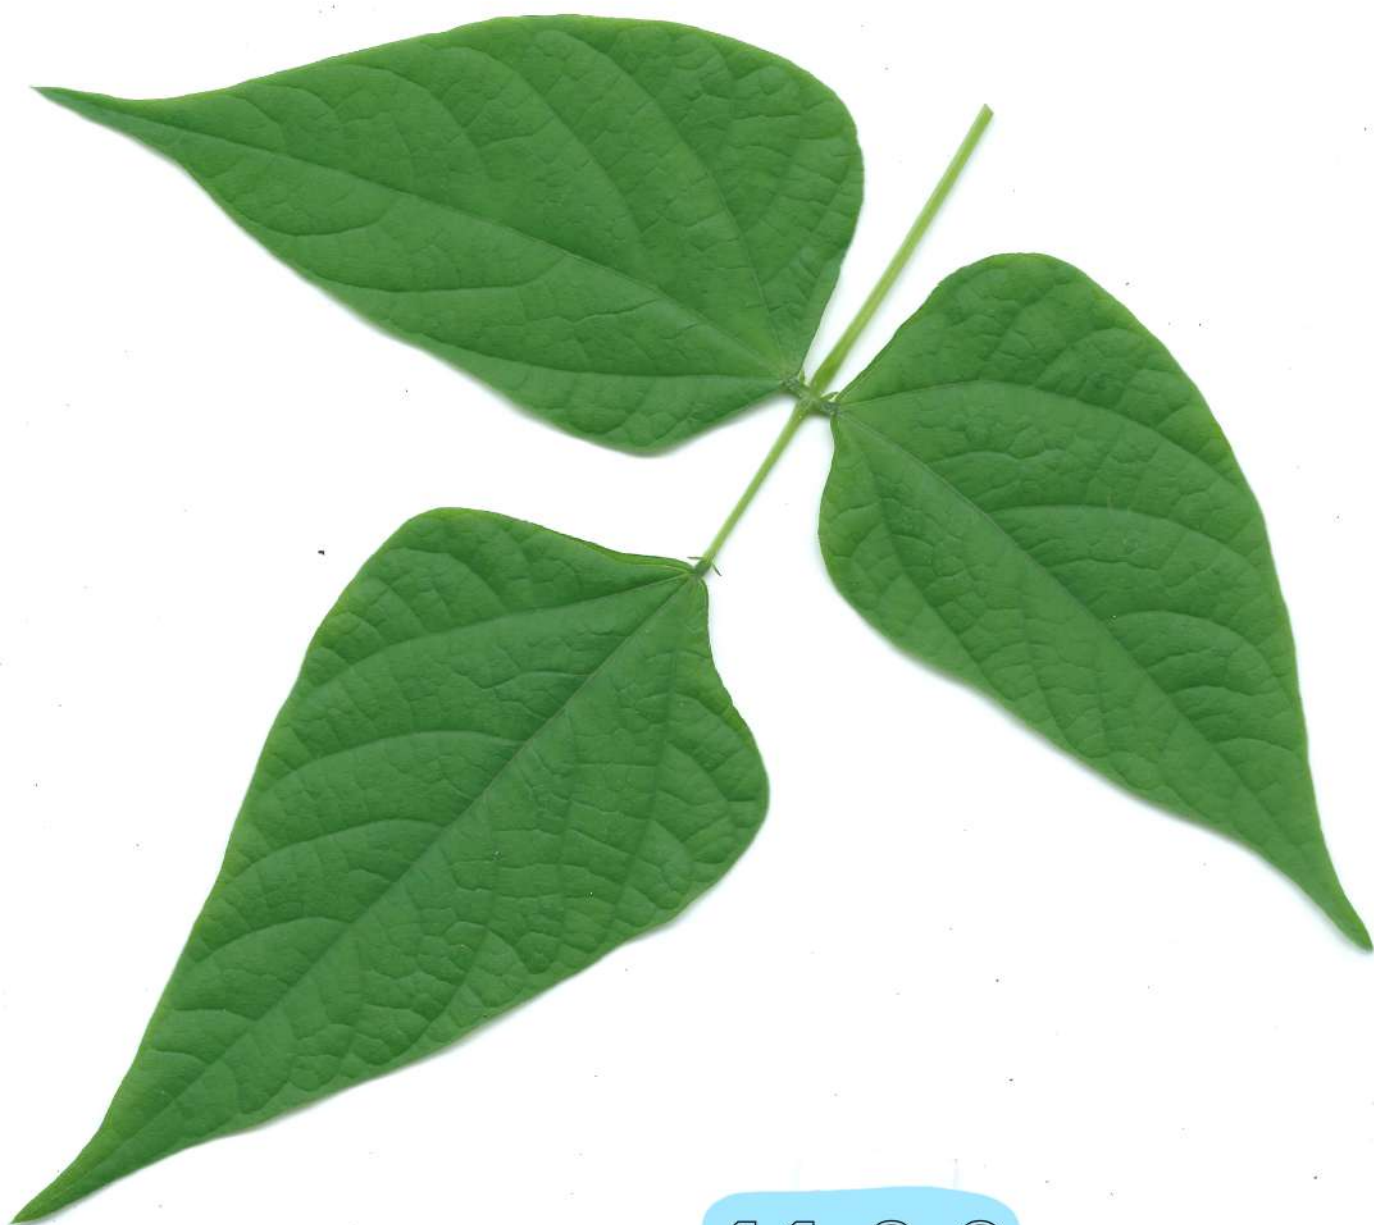

**11-2-3**

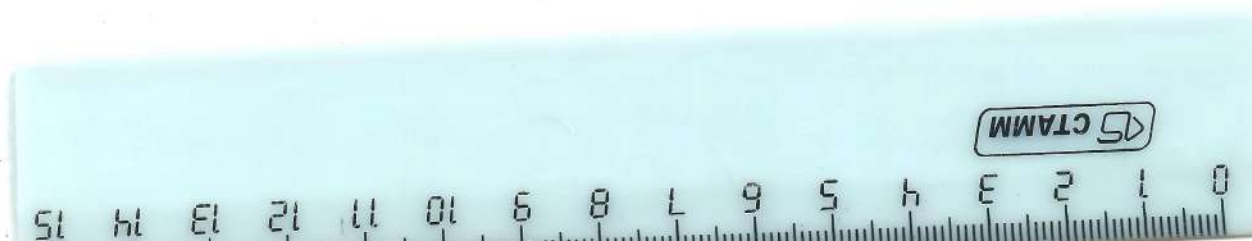



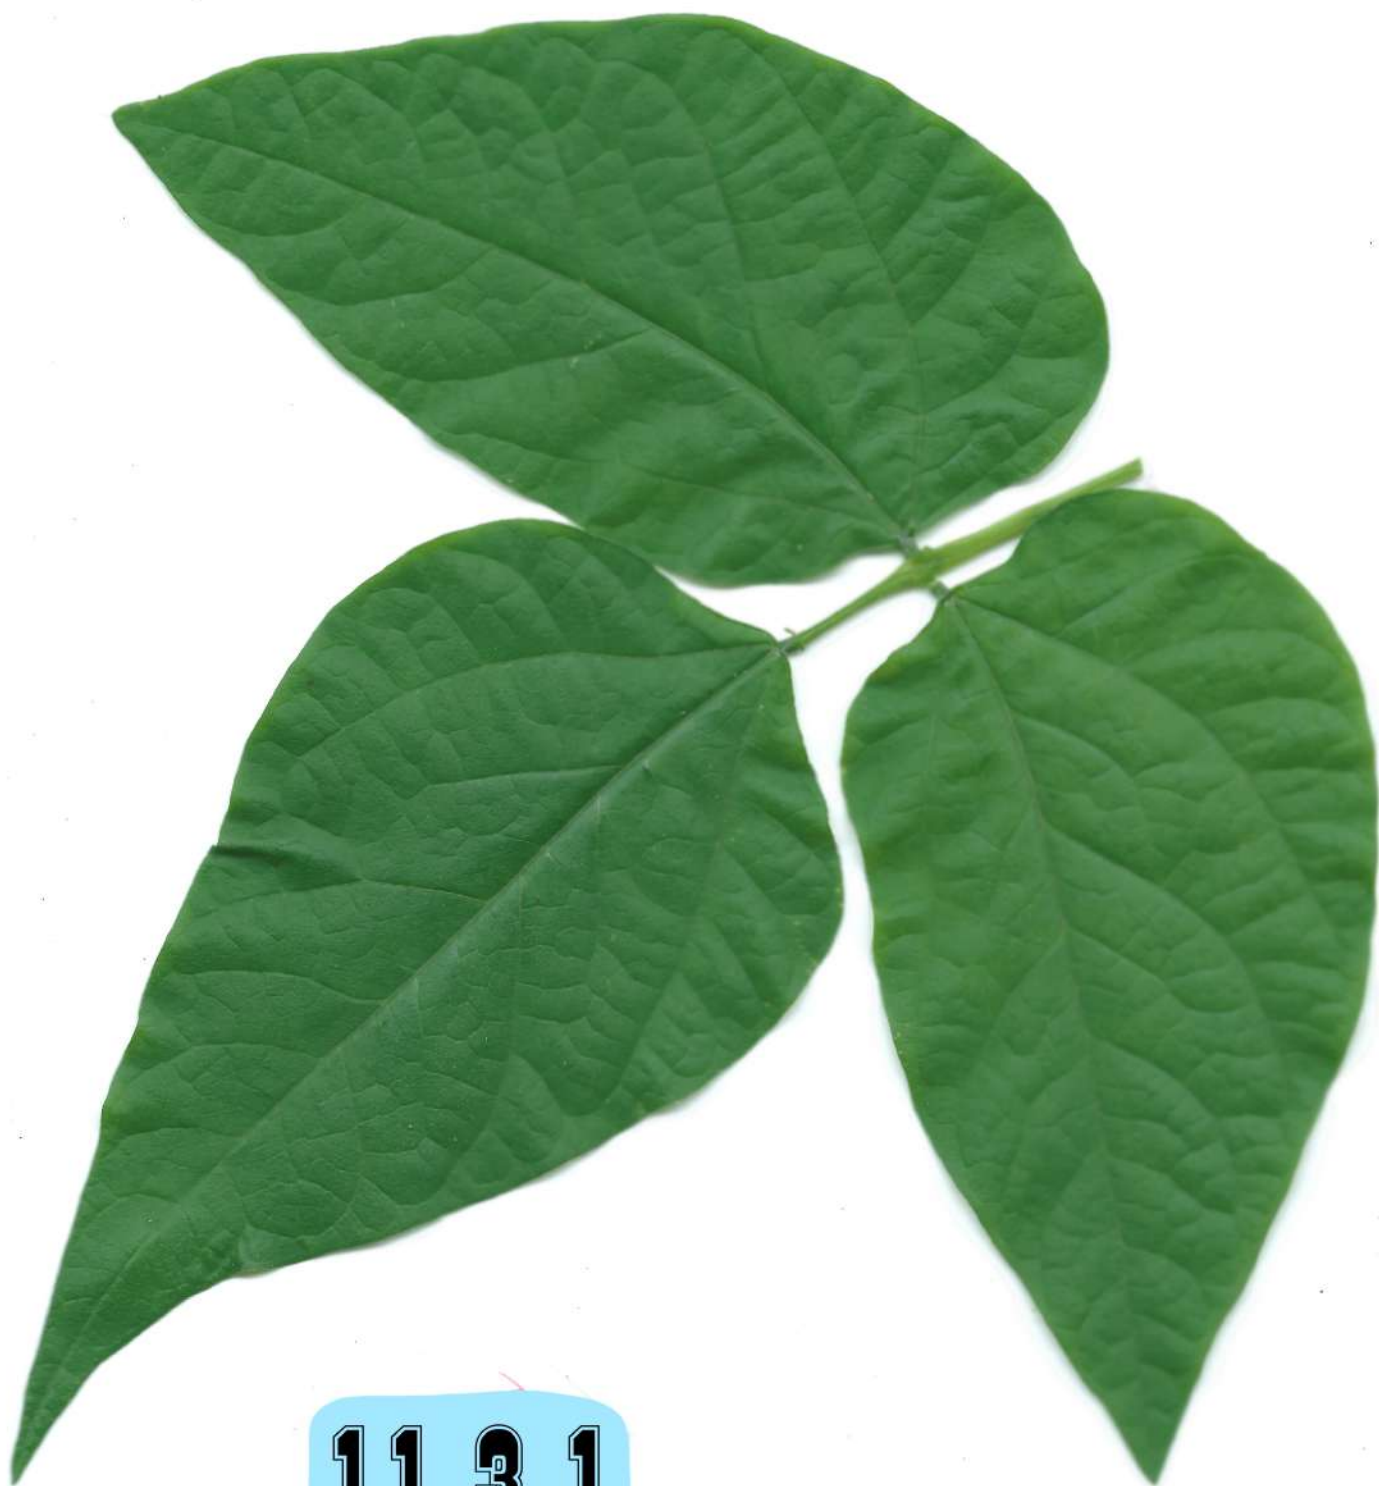

**11-3-1**

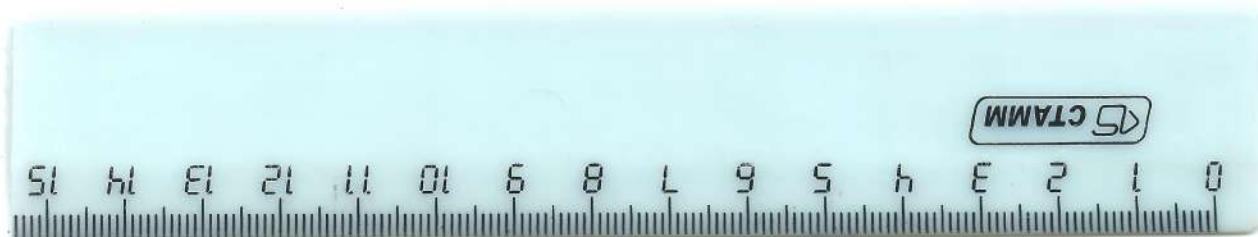



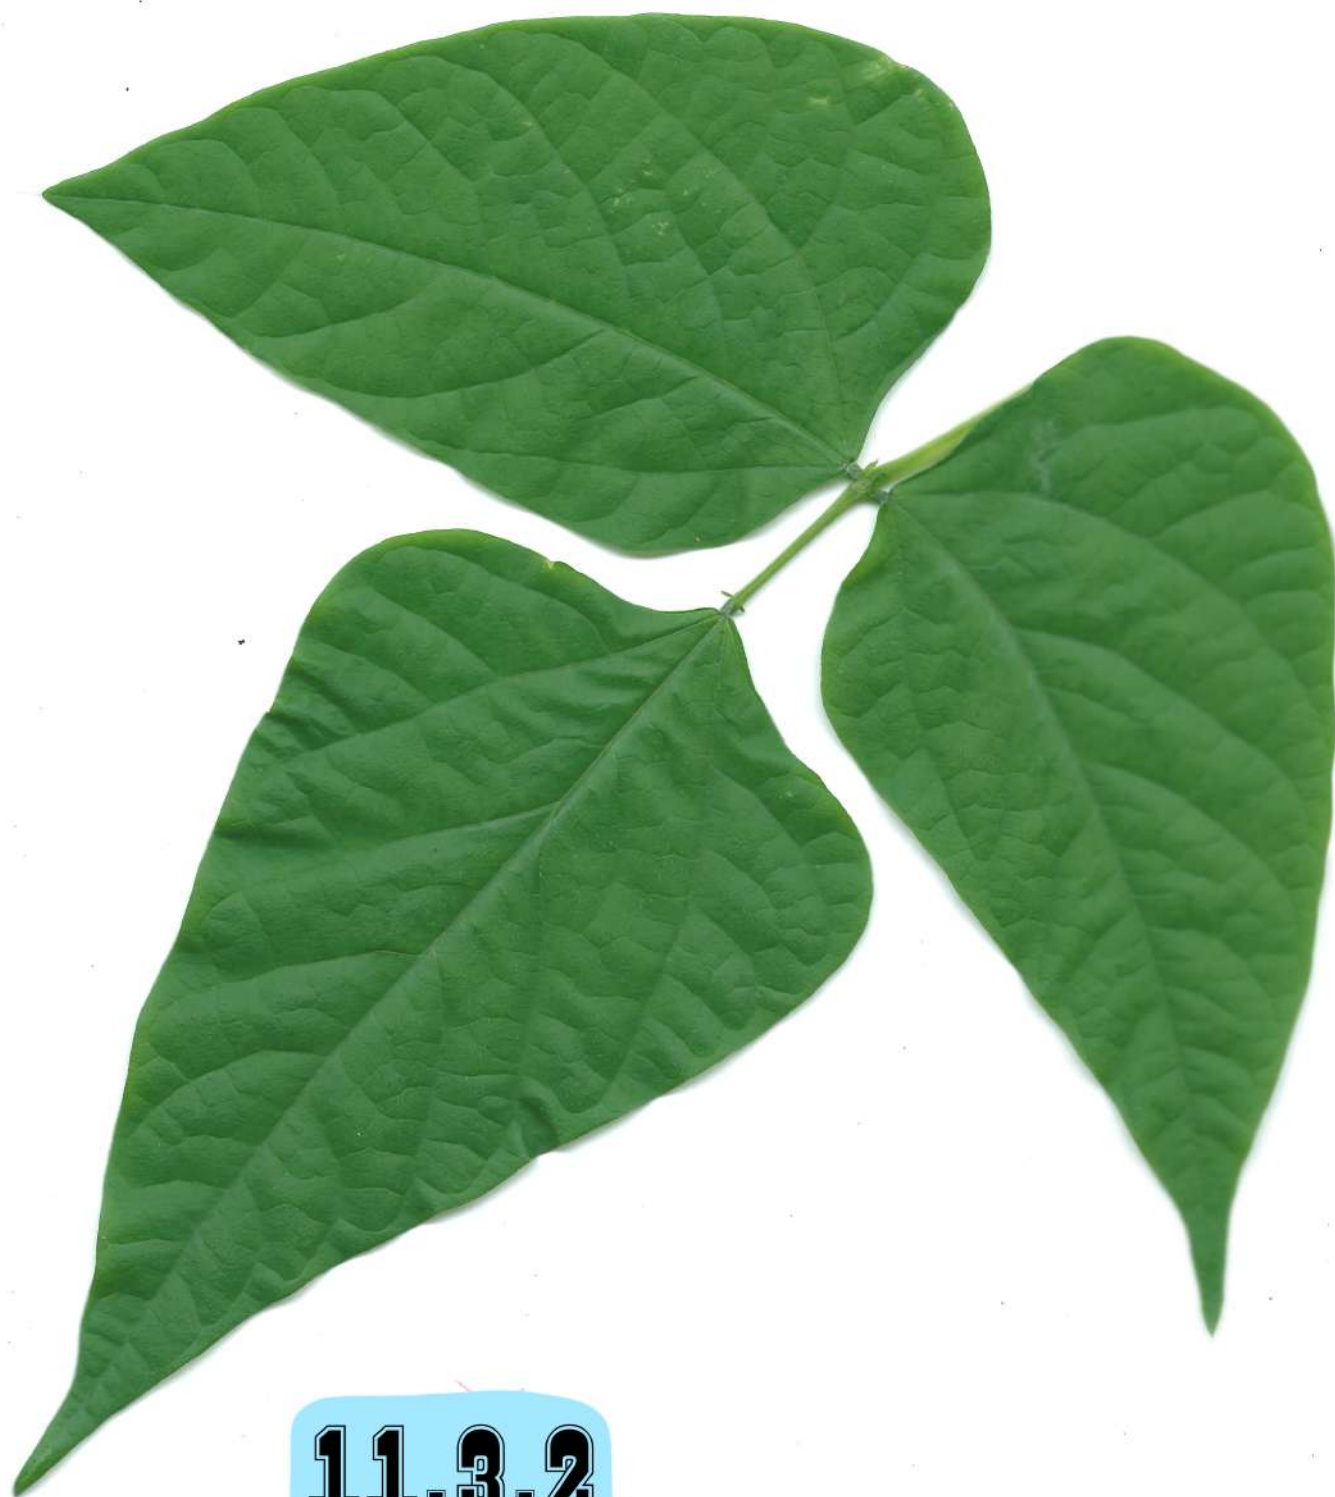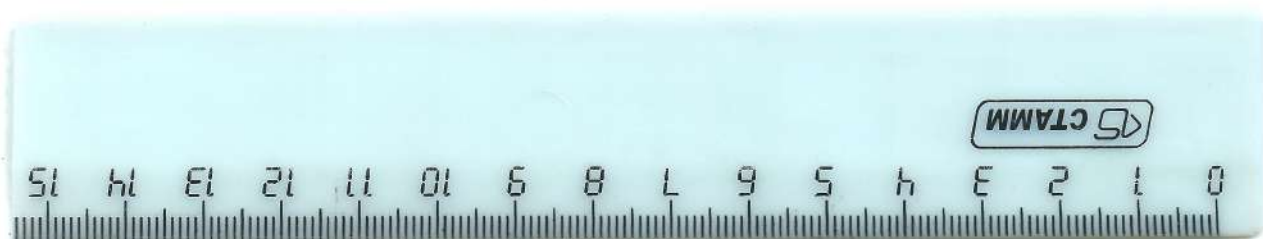

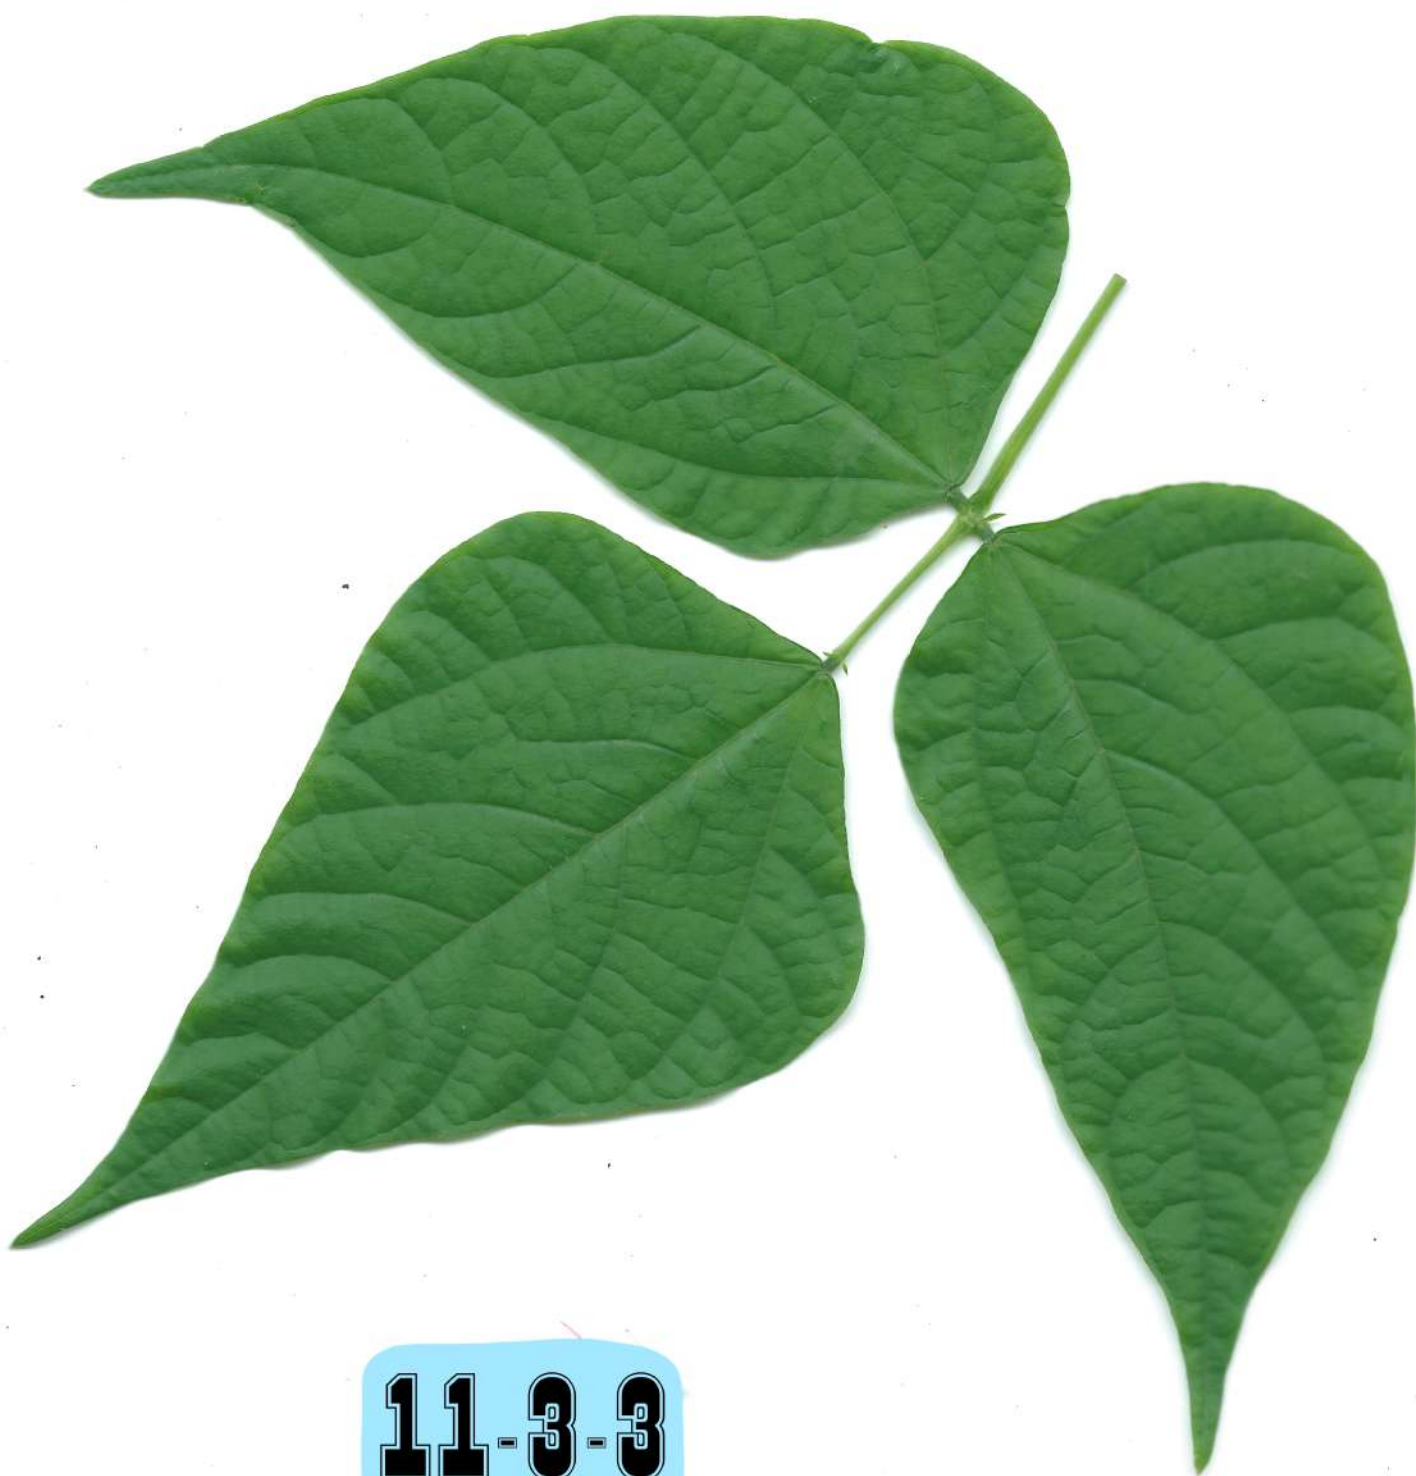

11-3-3

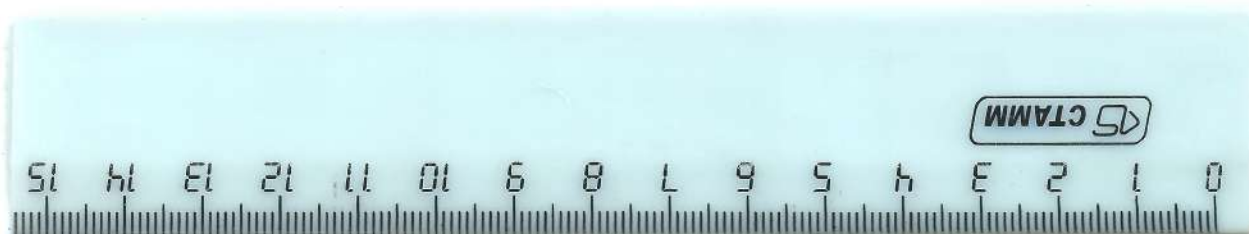

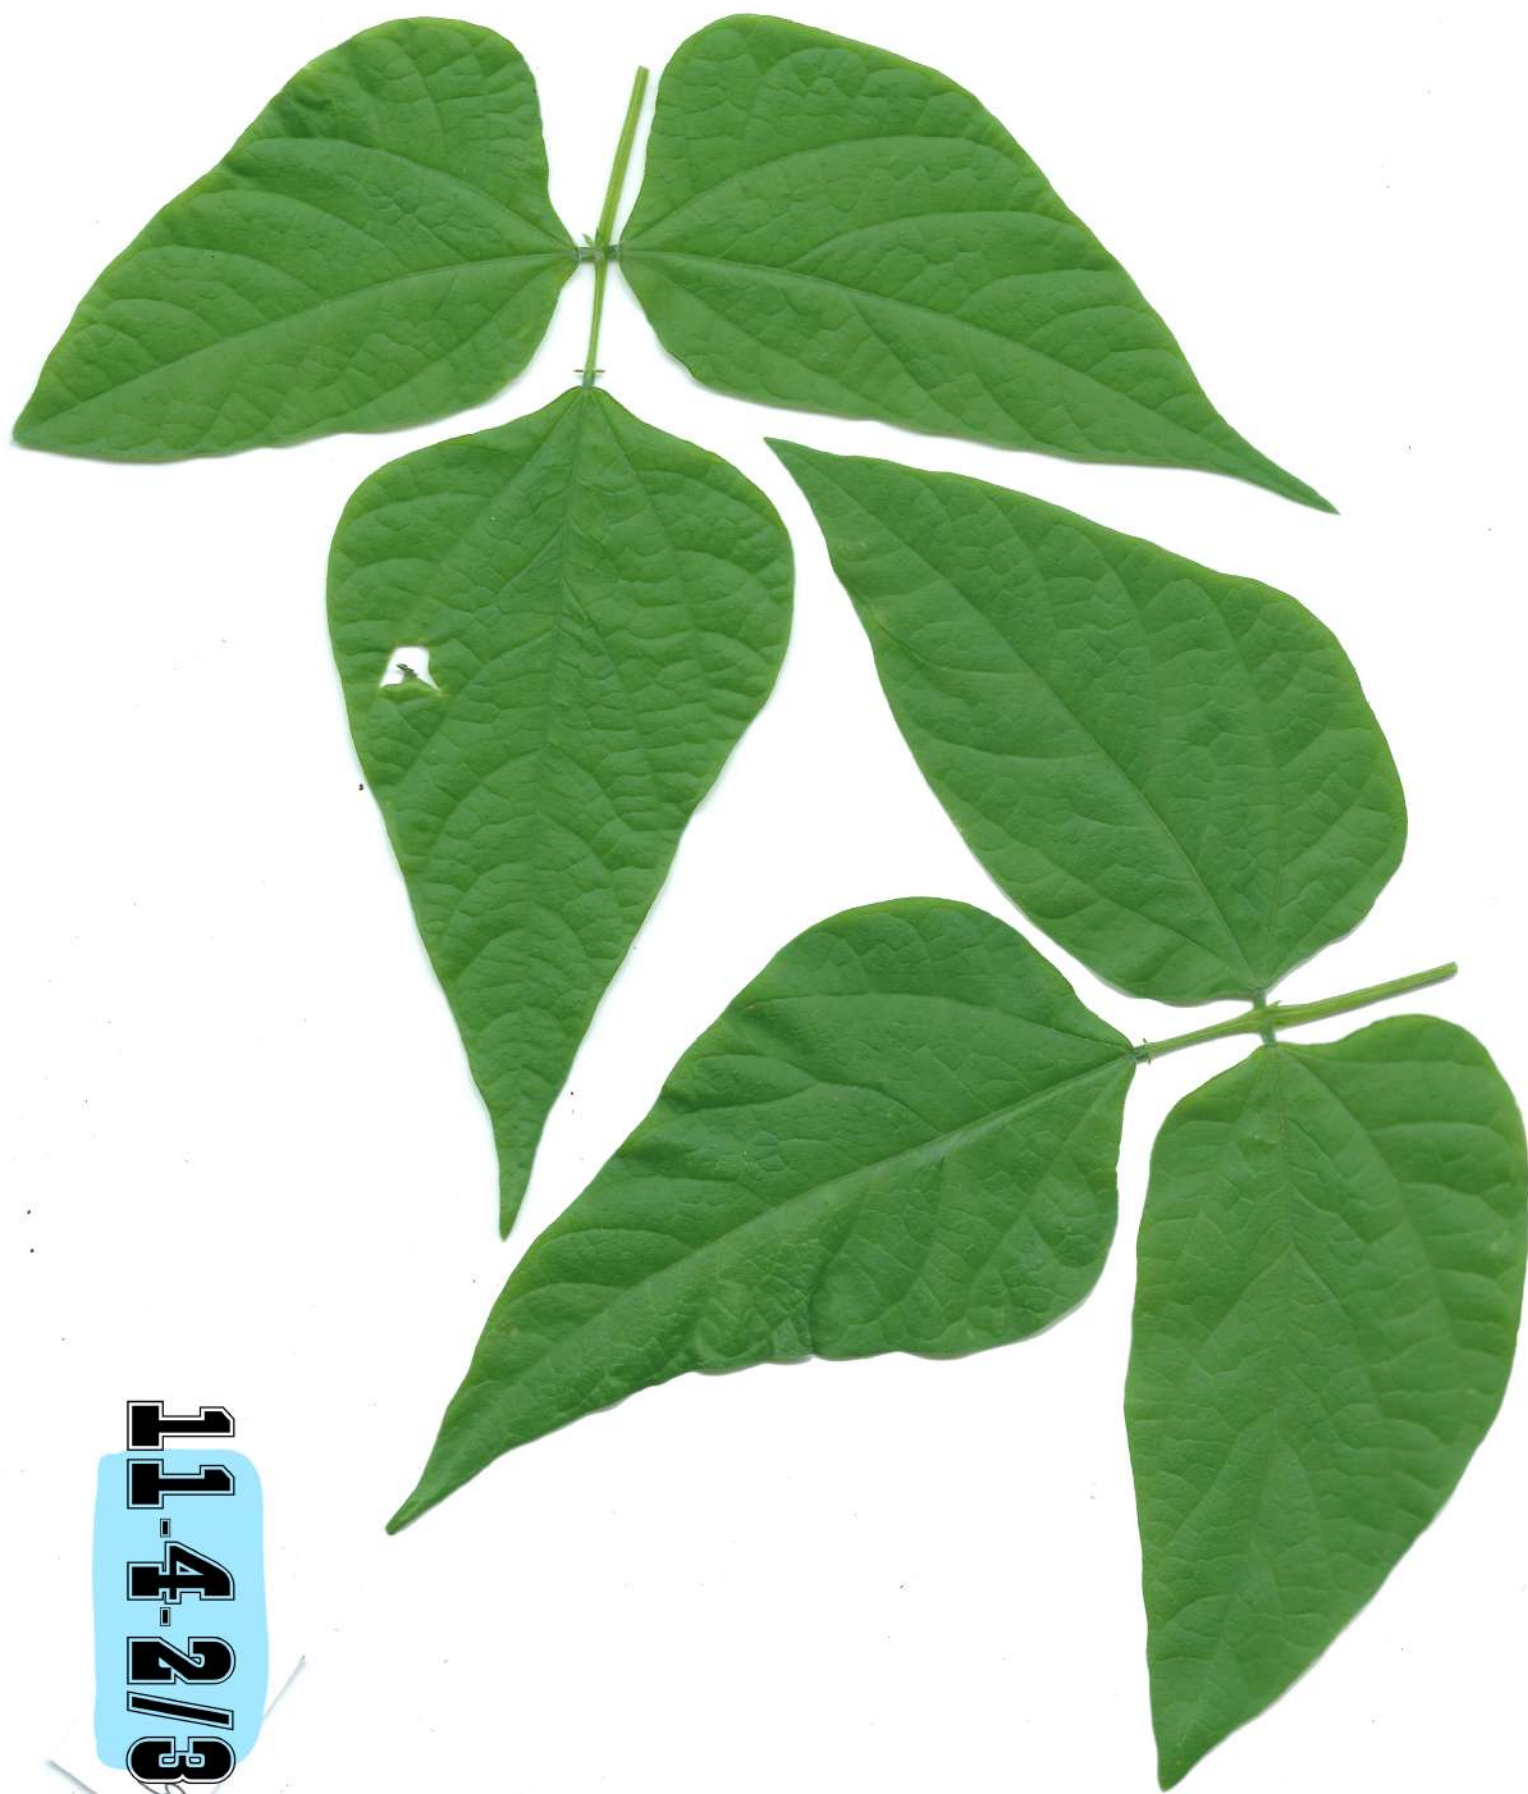

11-4-2/3



11-5-3

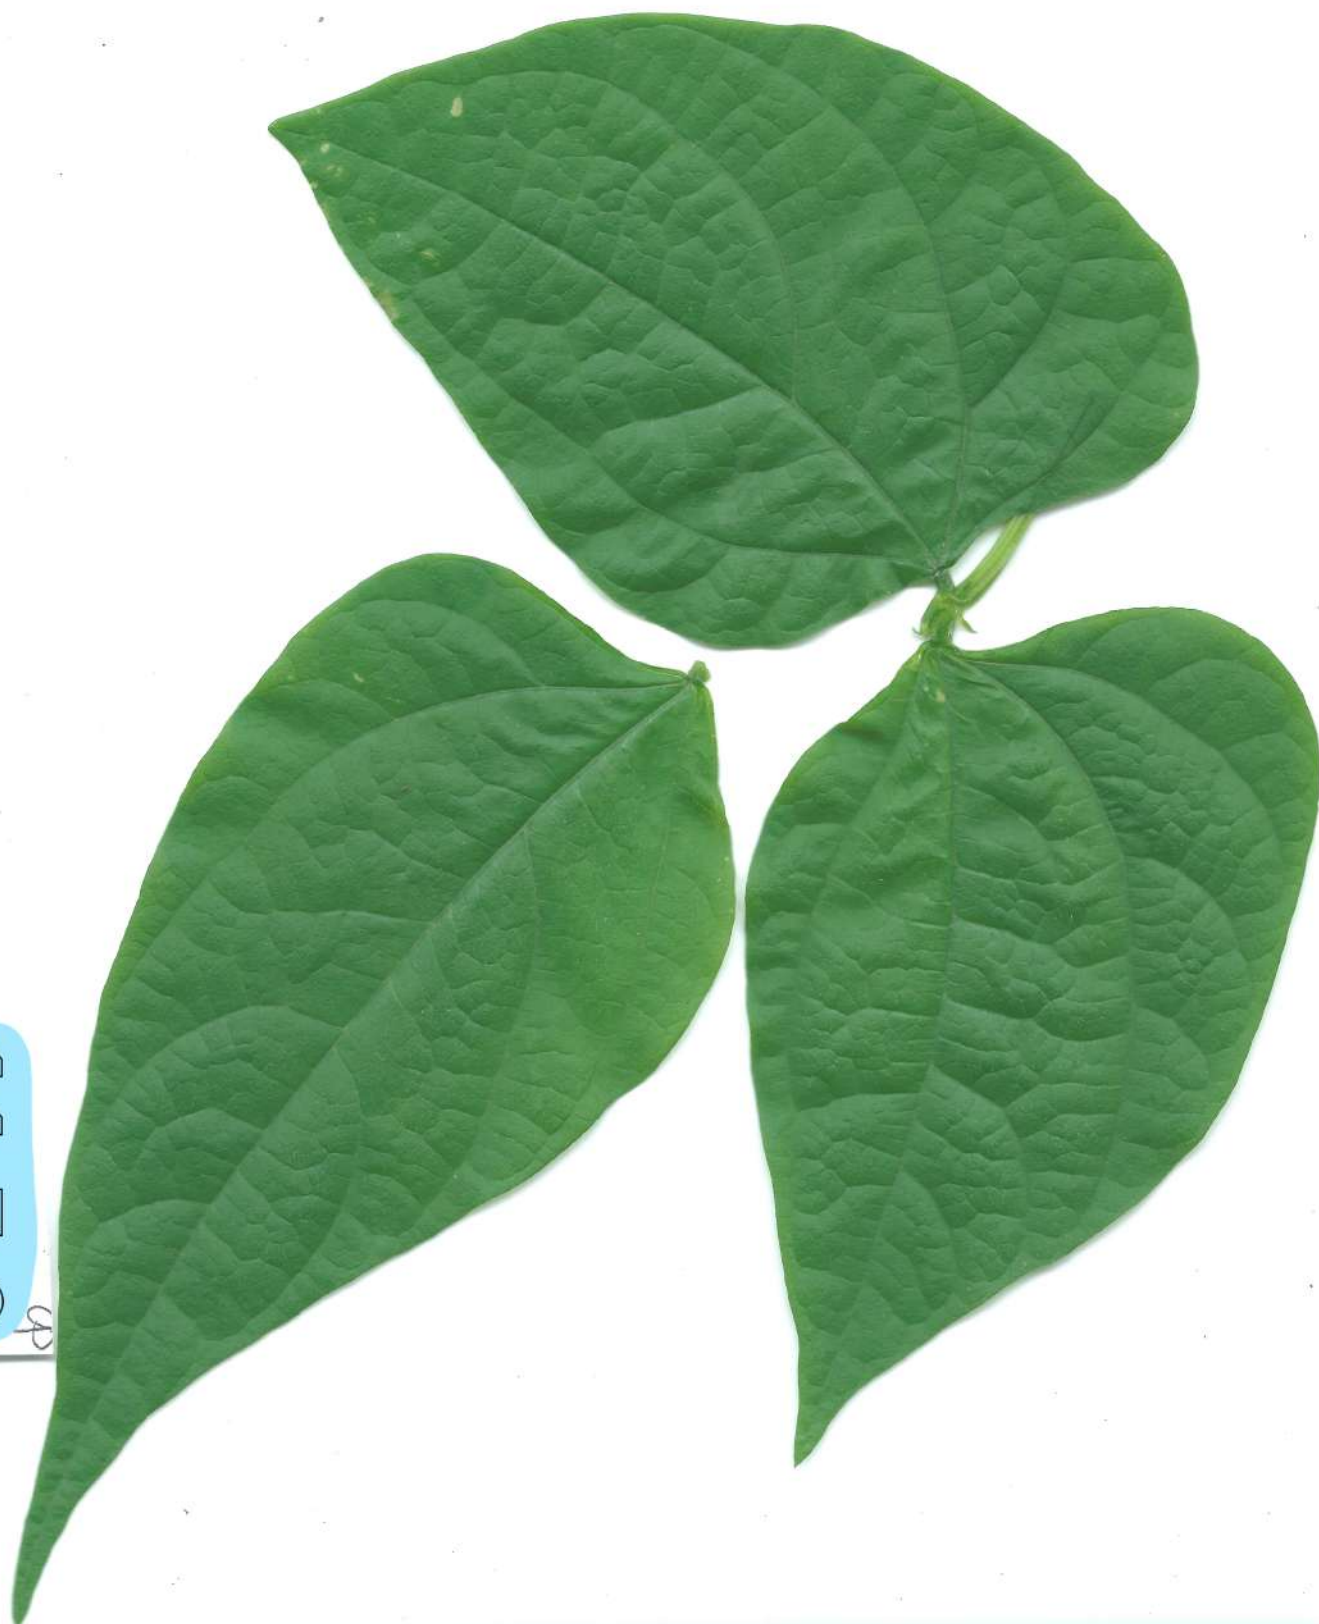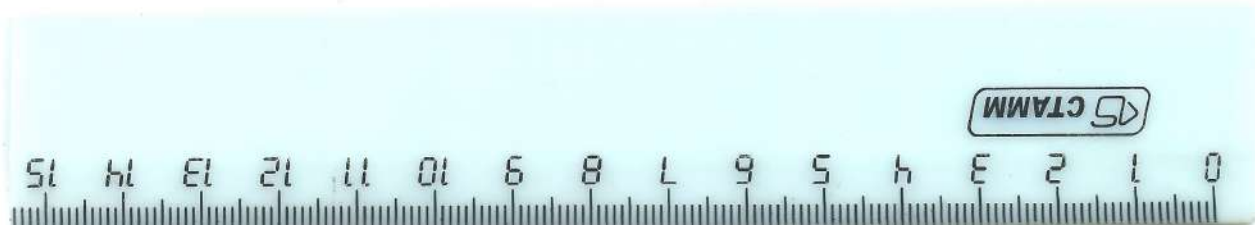



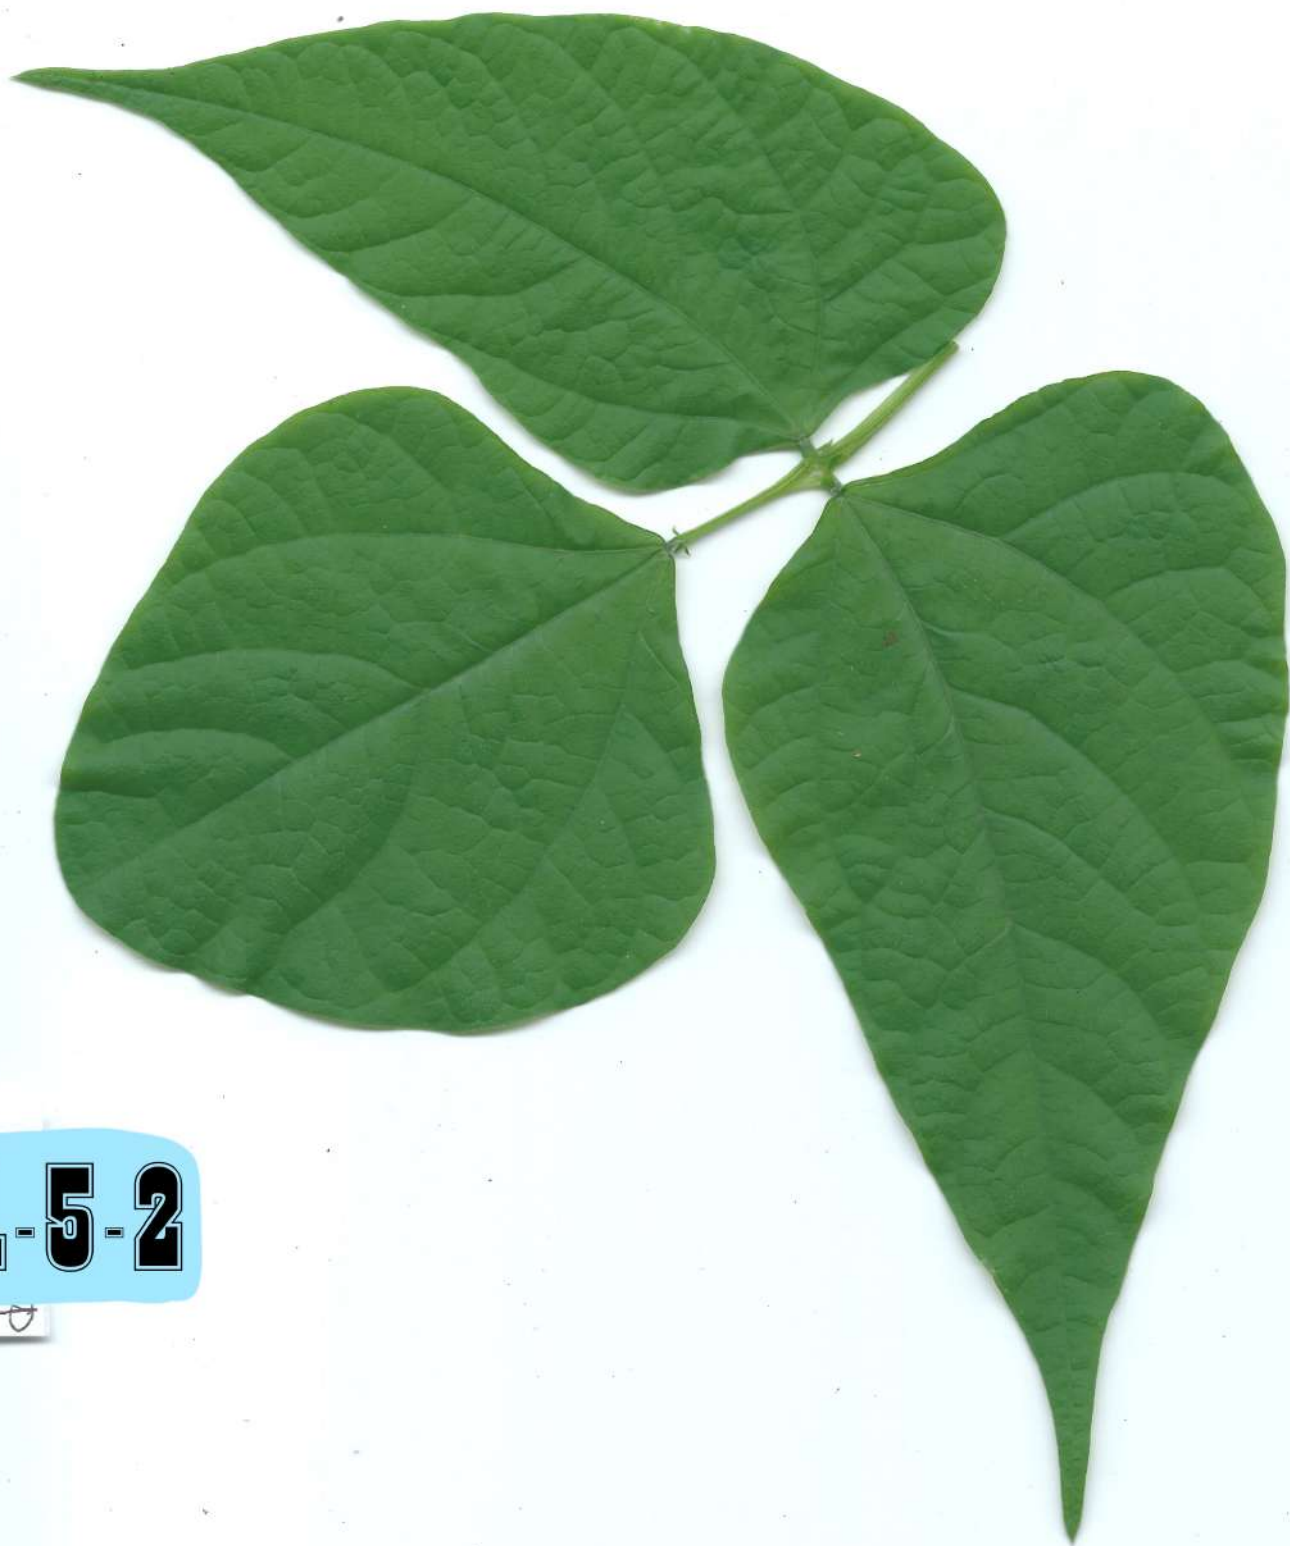

11-5-2

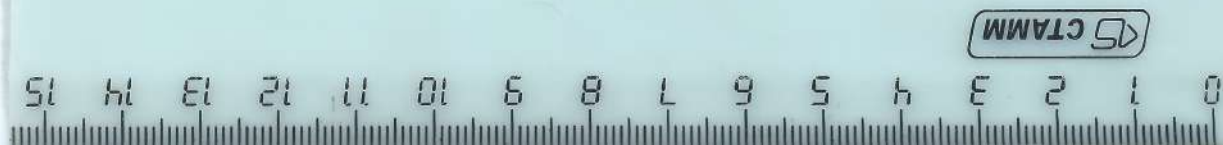

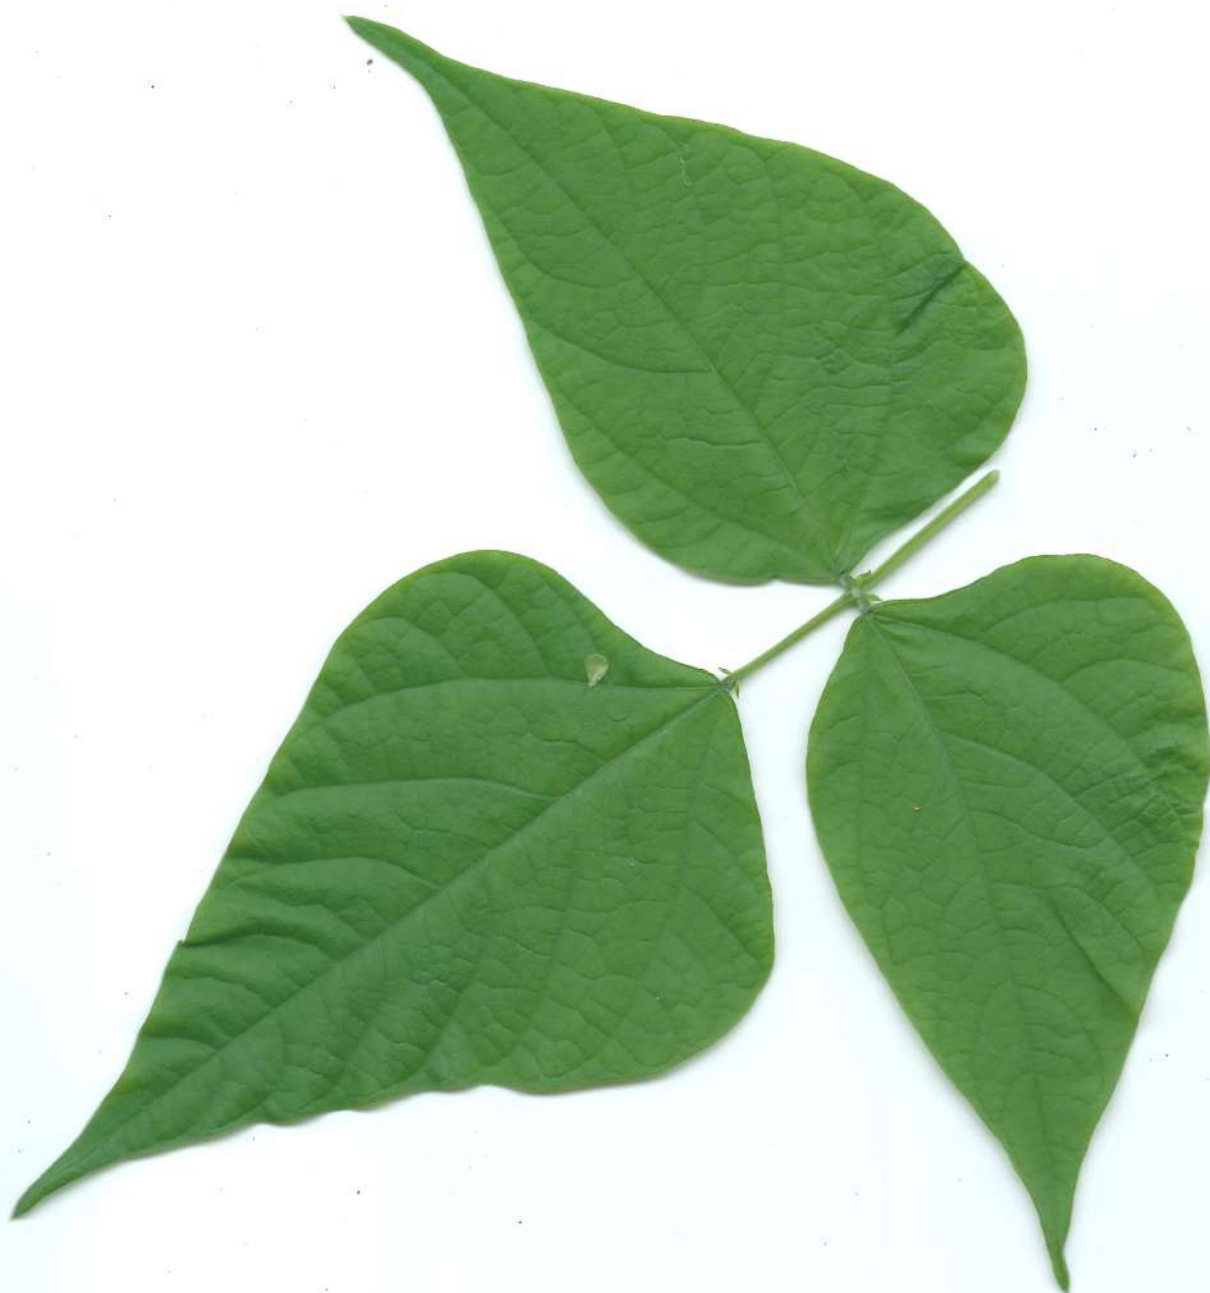

**11-5-1**

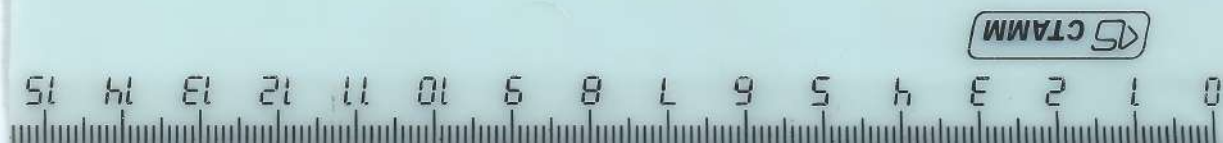

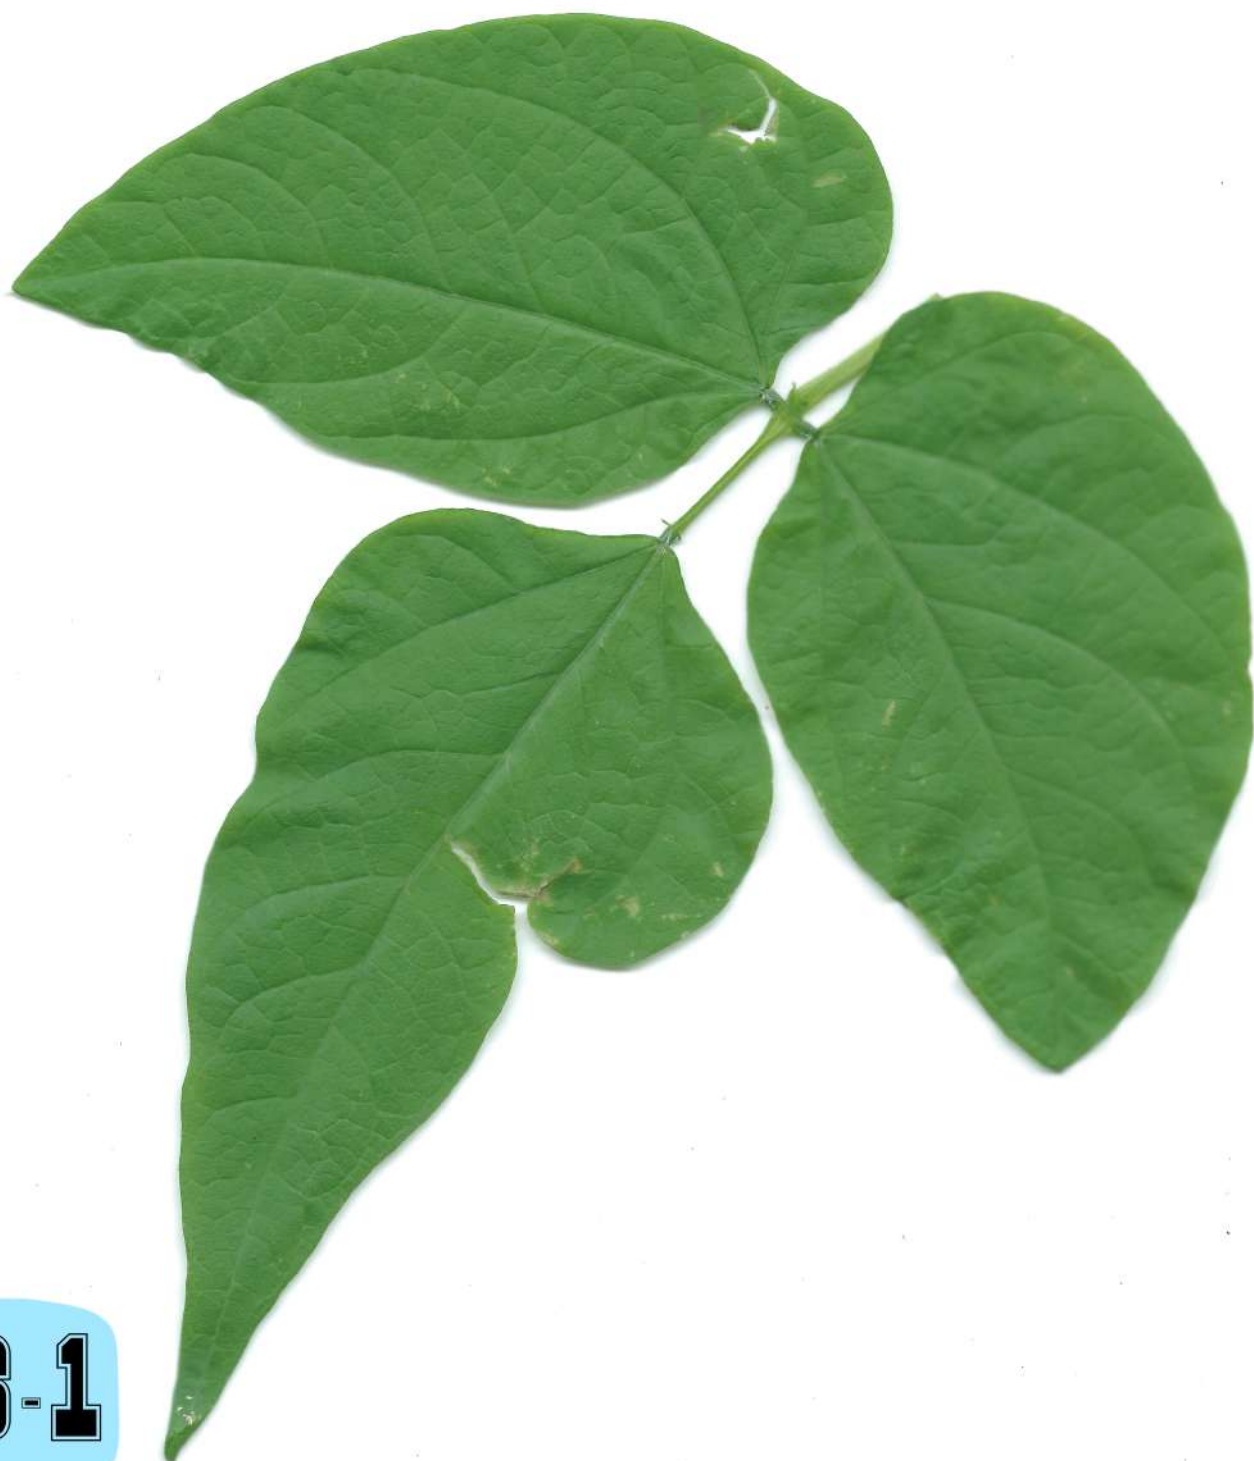

**11-6-1**

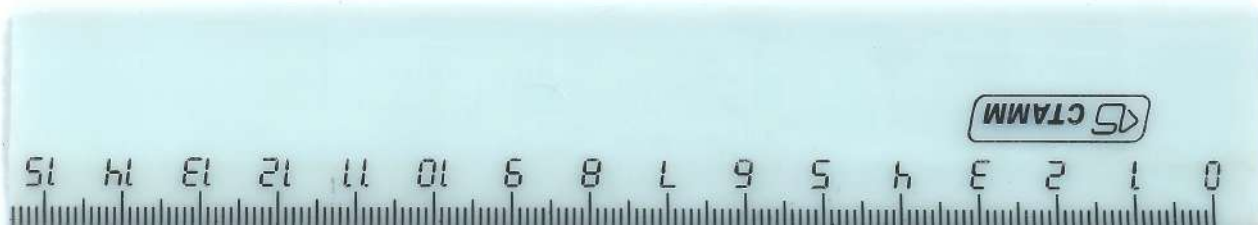



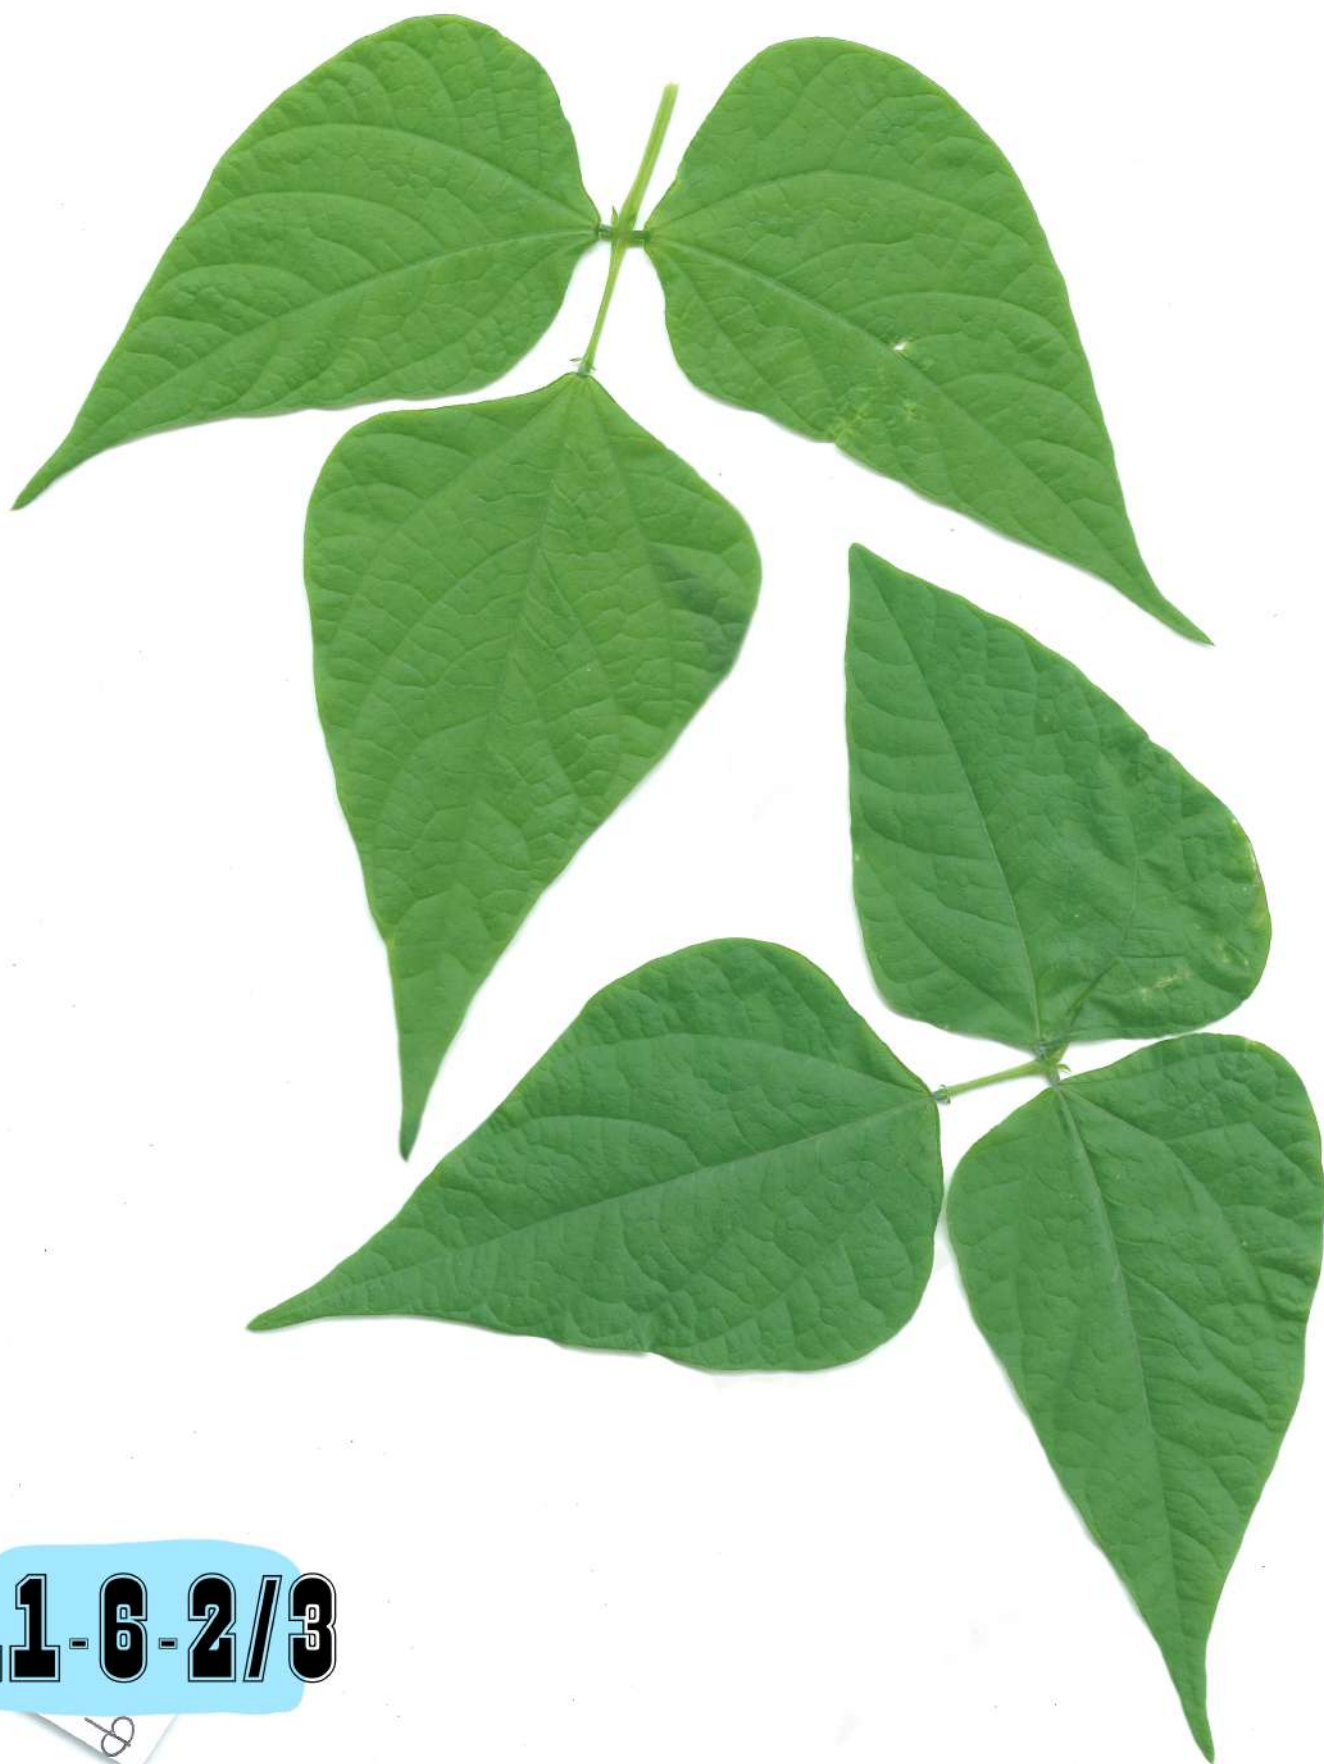

11-6-2/3

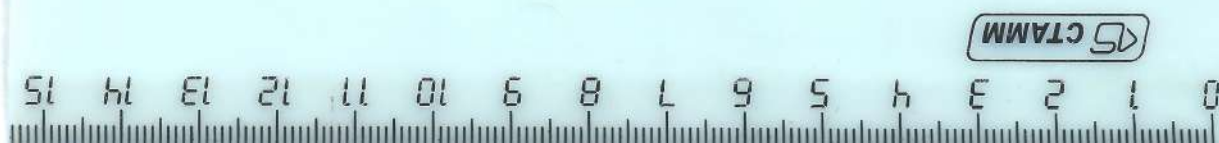



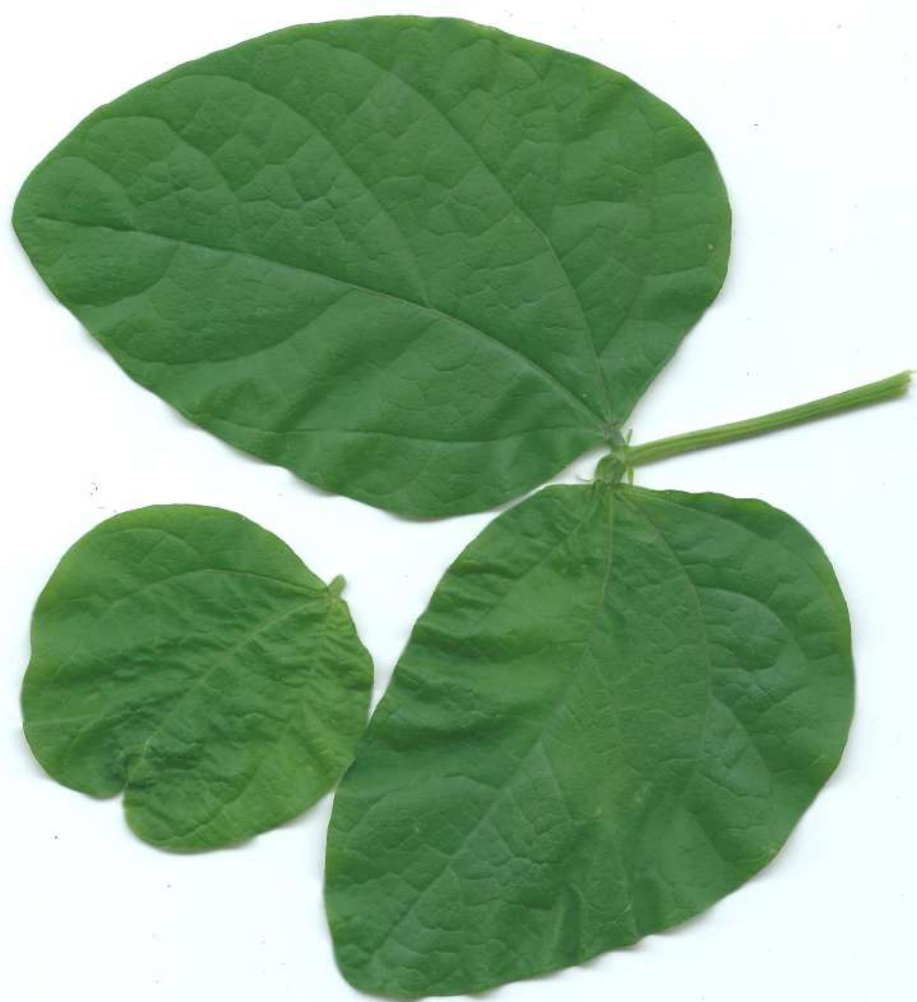

11-7-3

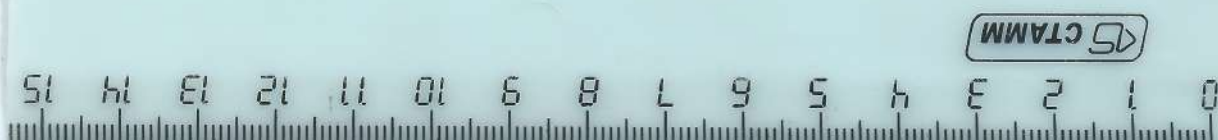

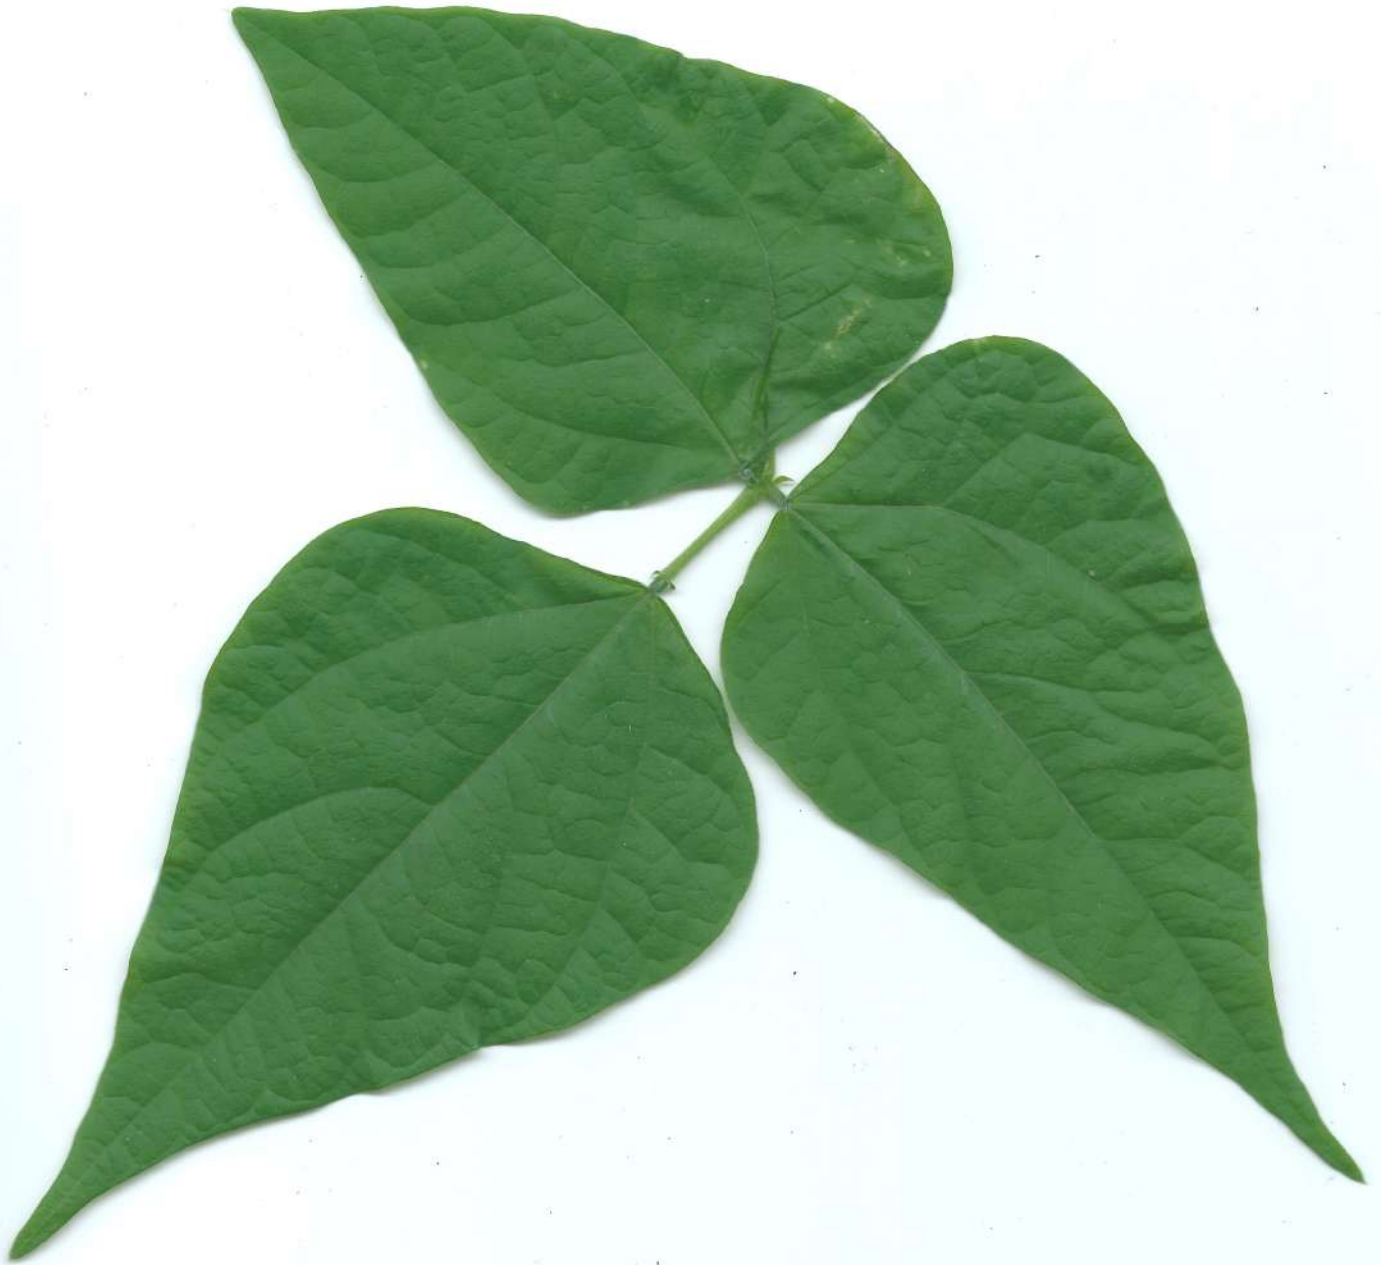

**11-7-1**

8

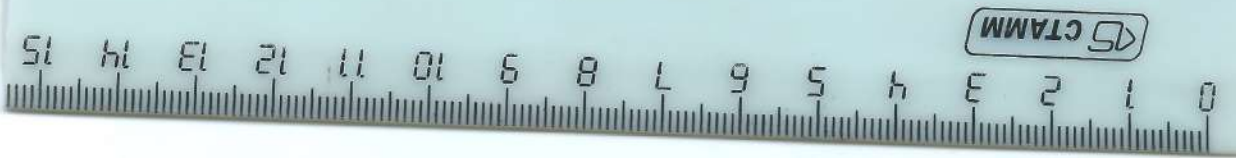

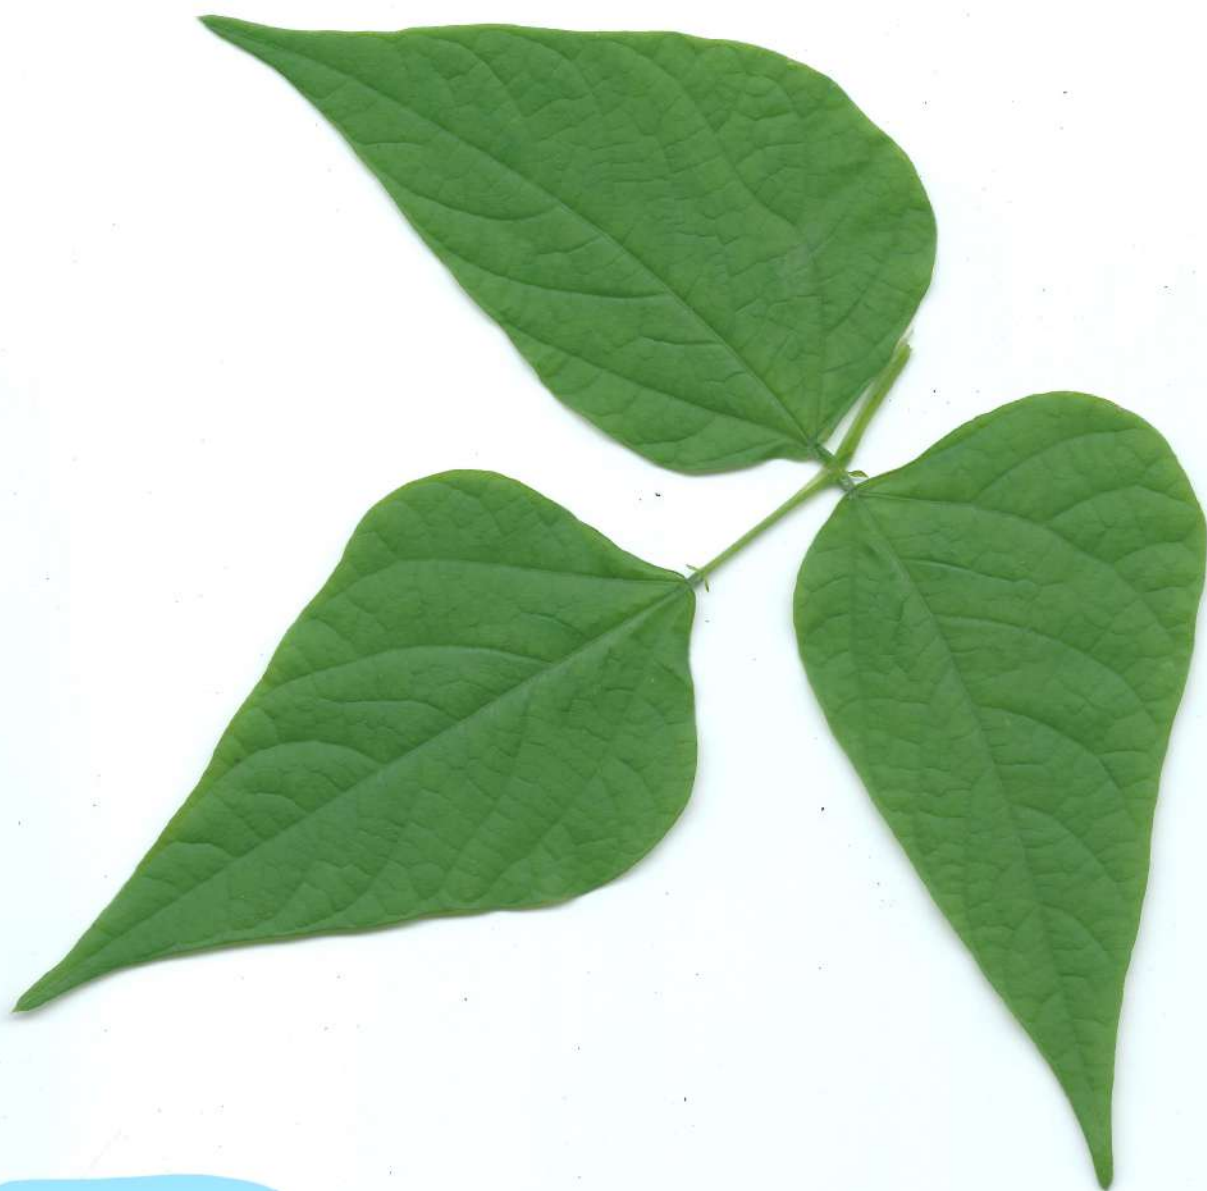

**11-7-2**

8

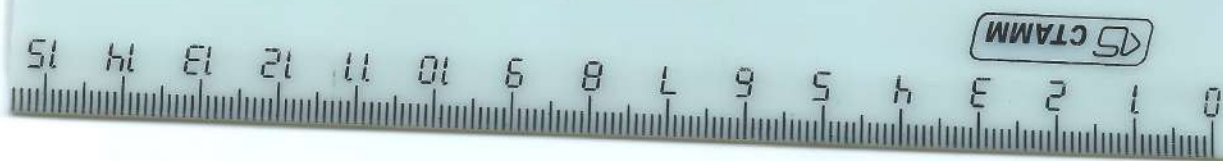

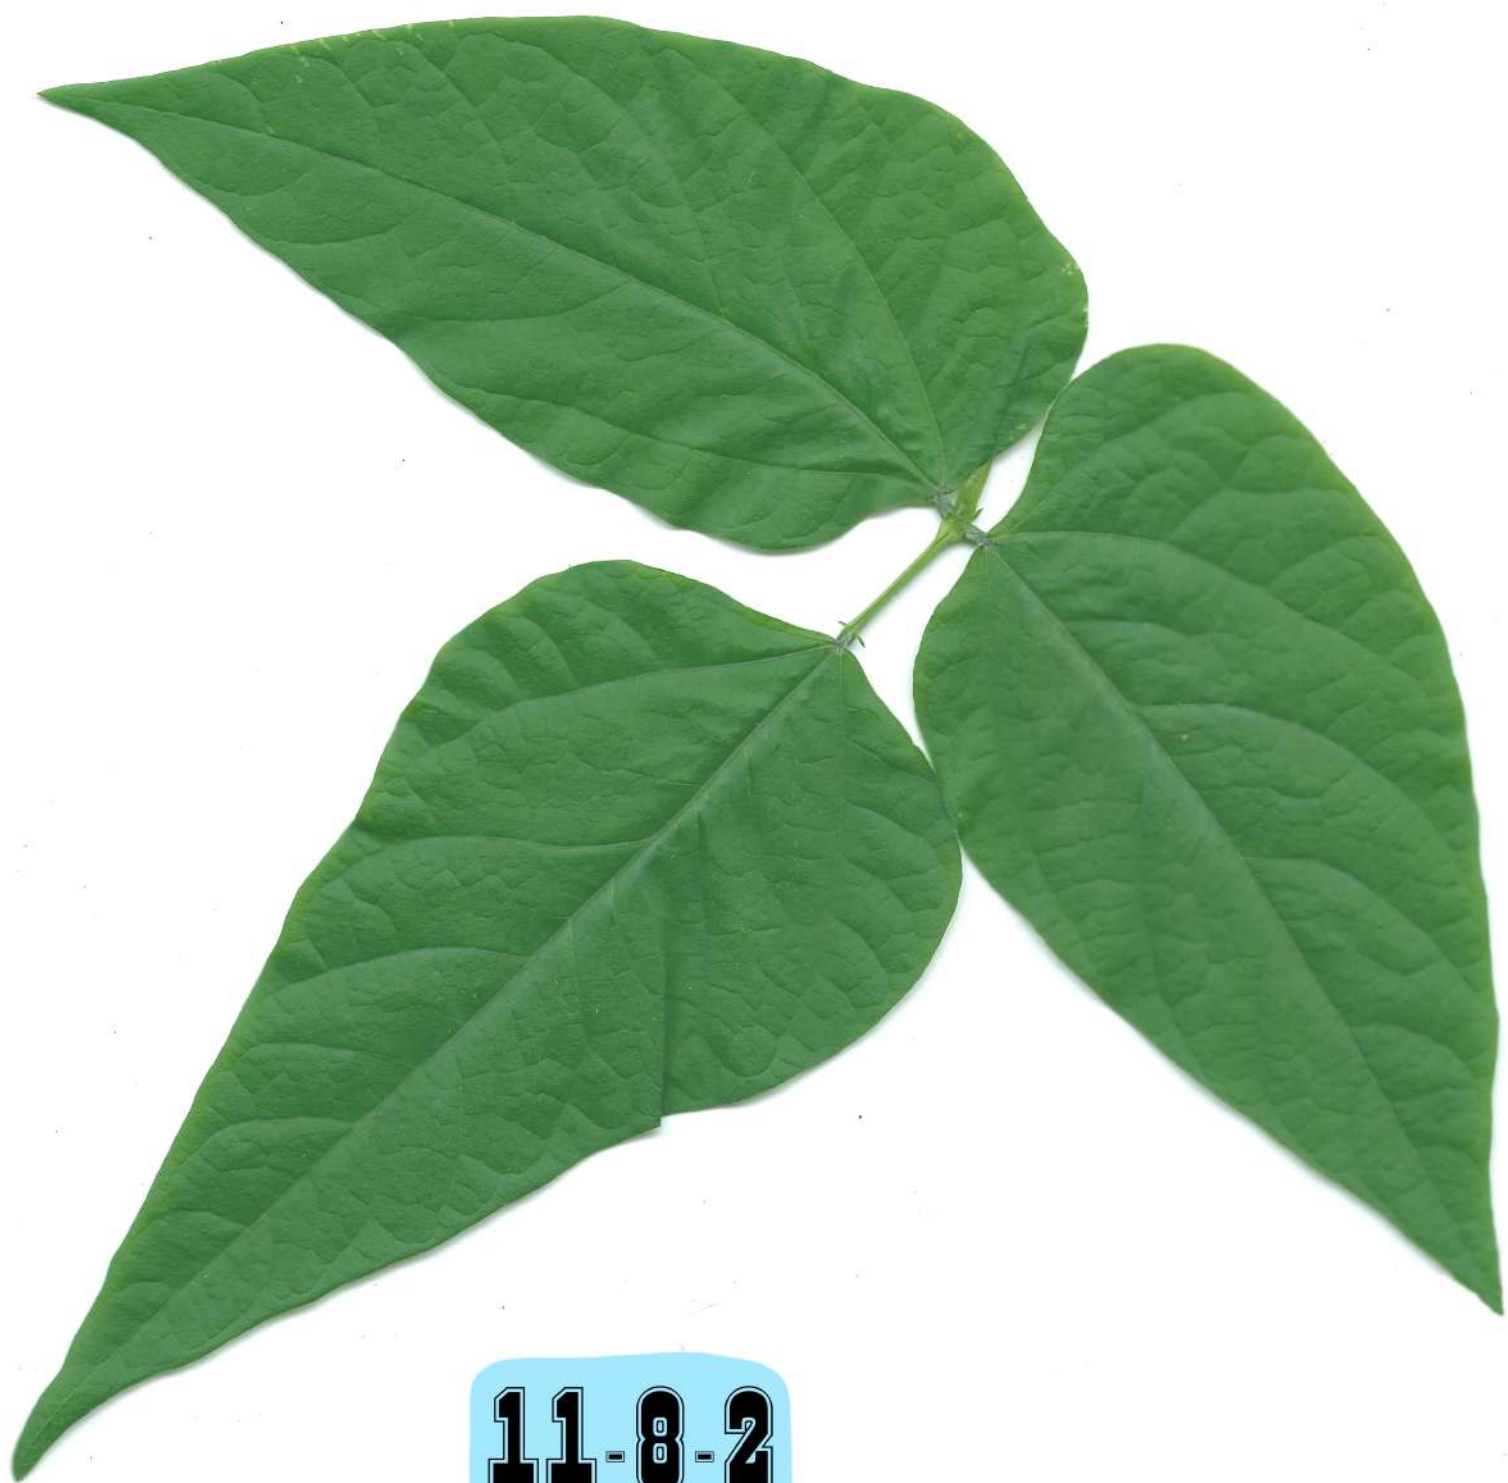

**11-8-2**

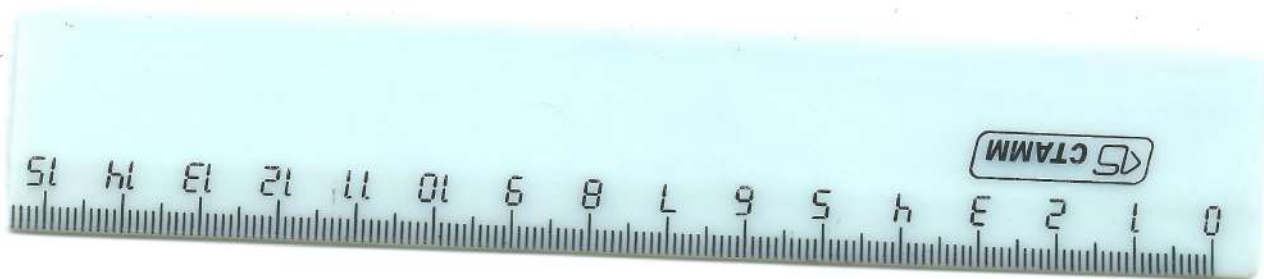



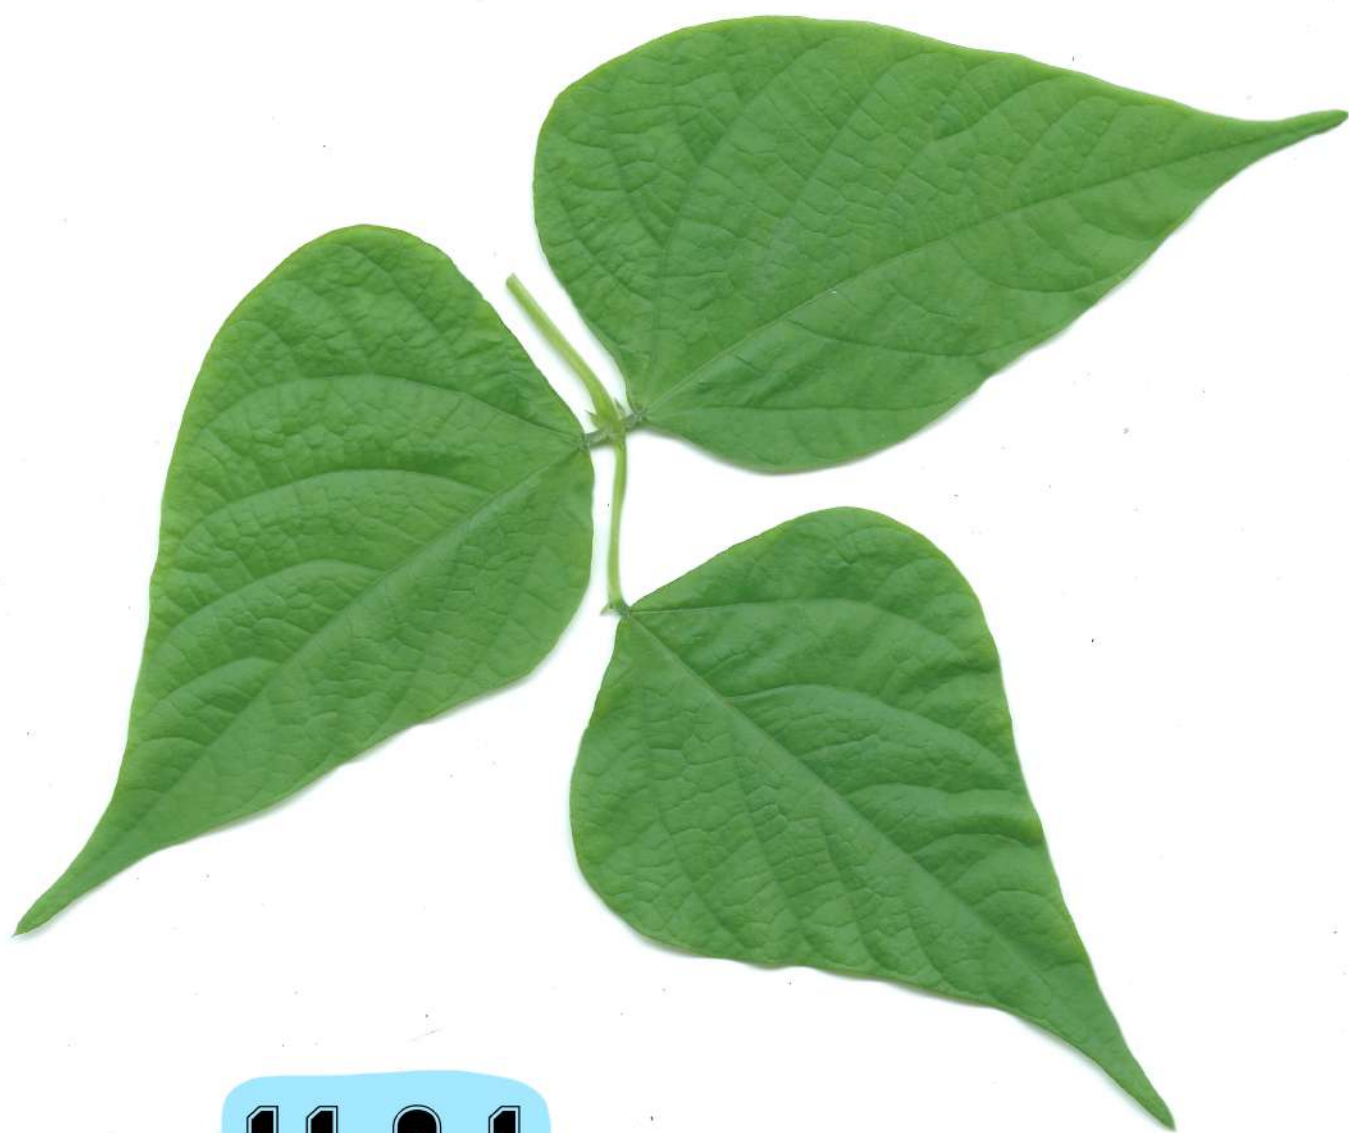

**11-8-1**

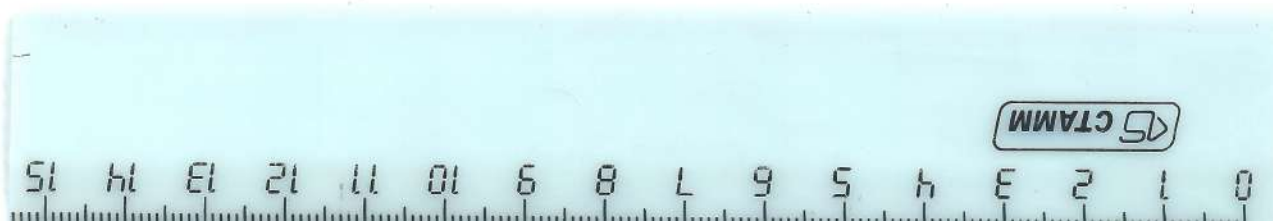

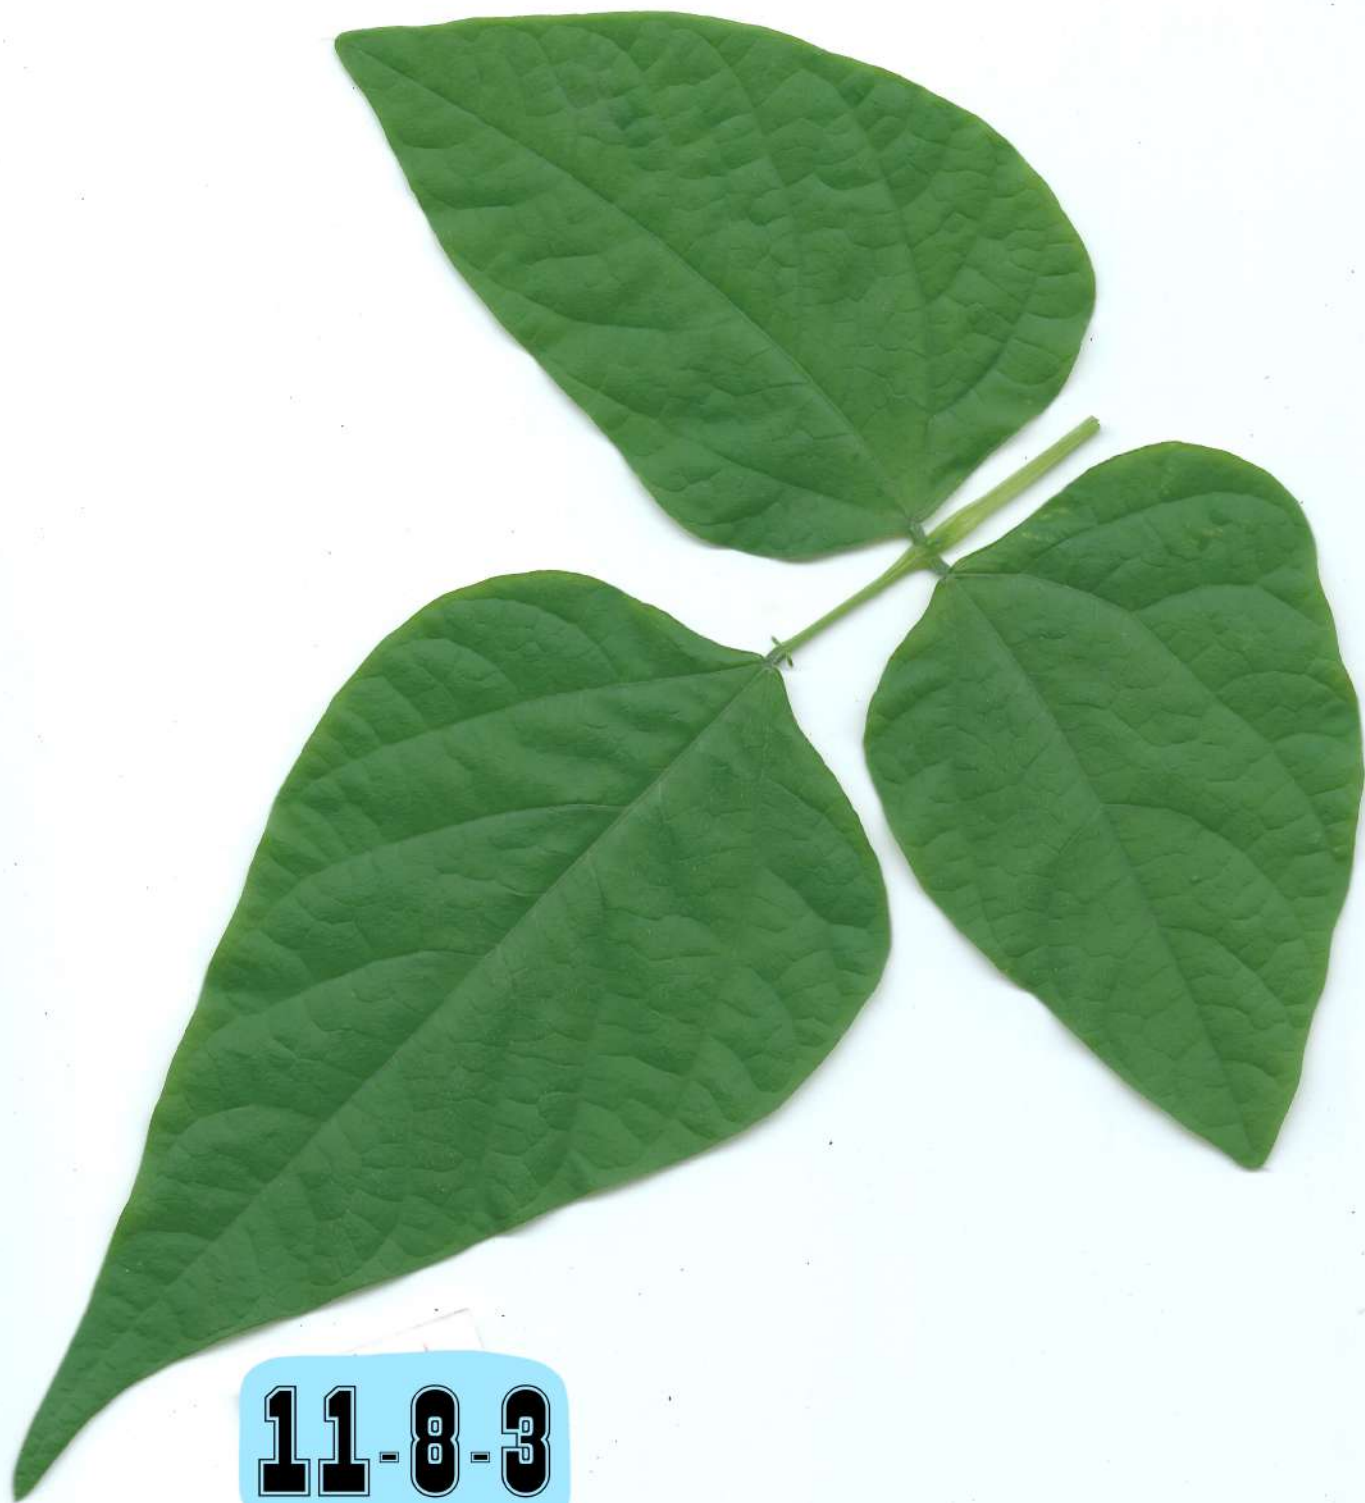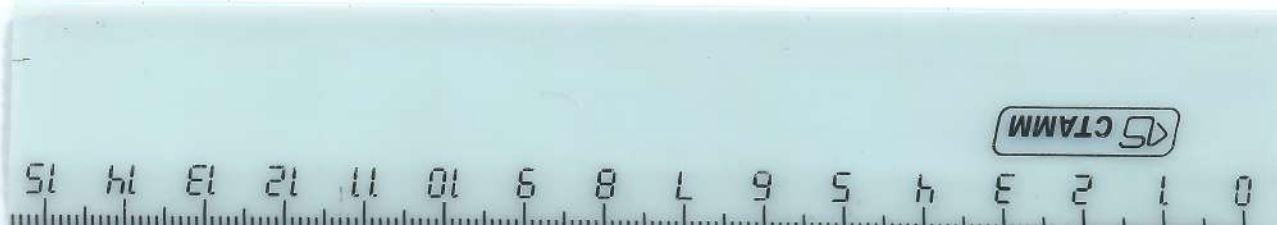



**11-7-2**

8



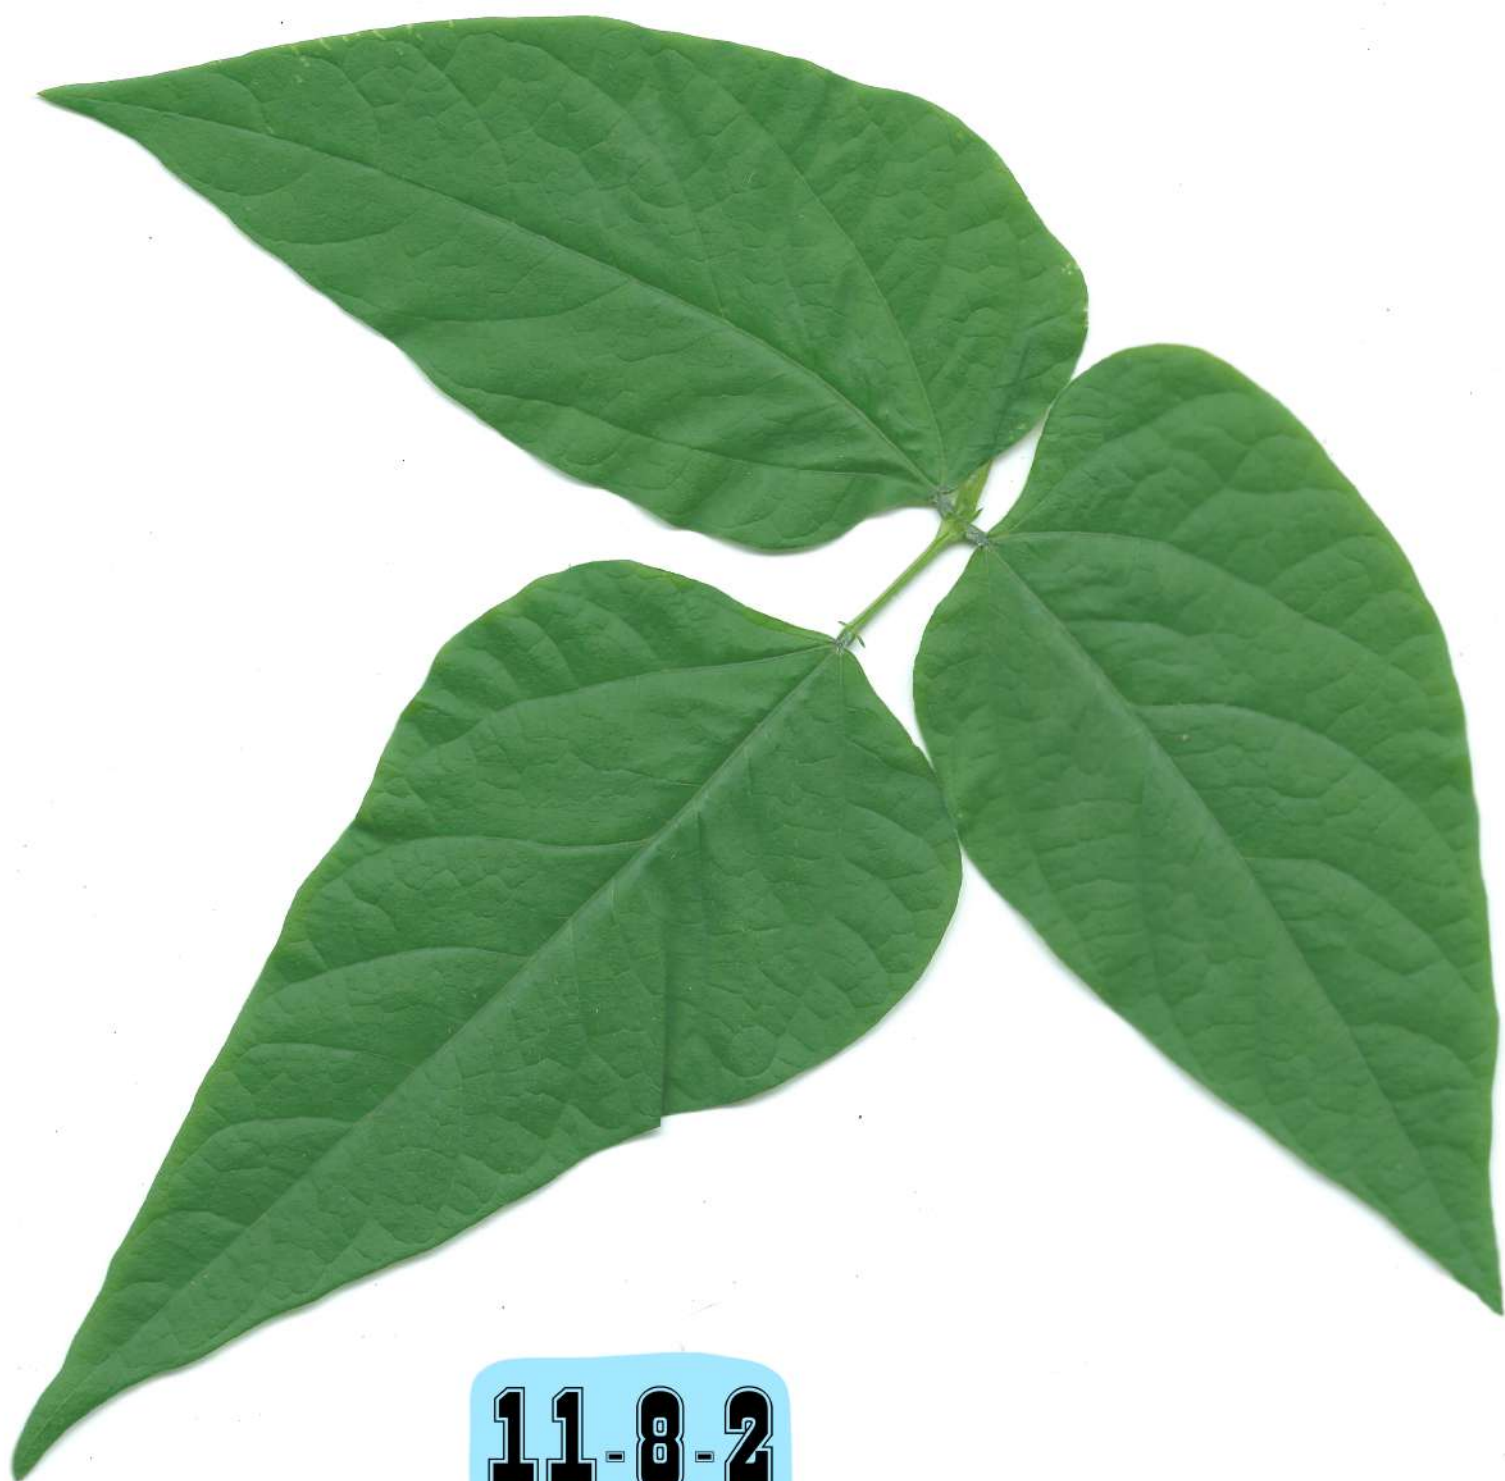

**11-8-2**







**11-8-1**





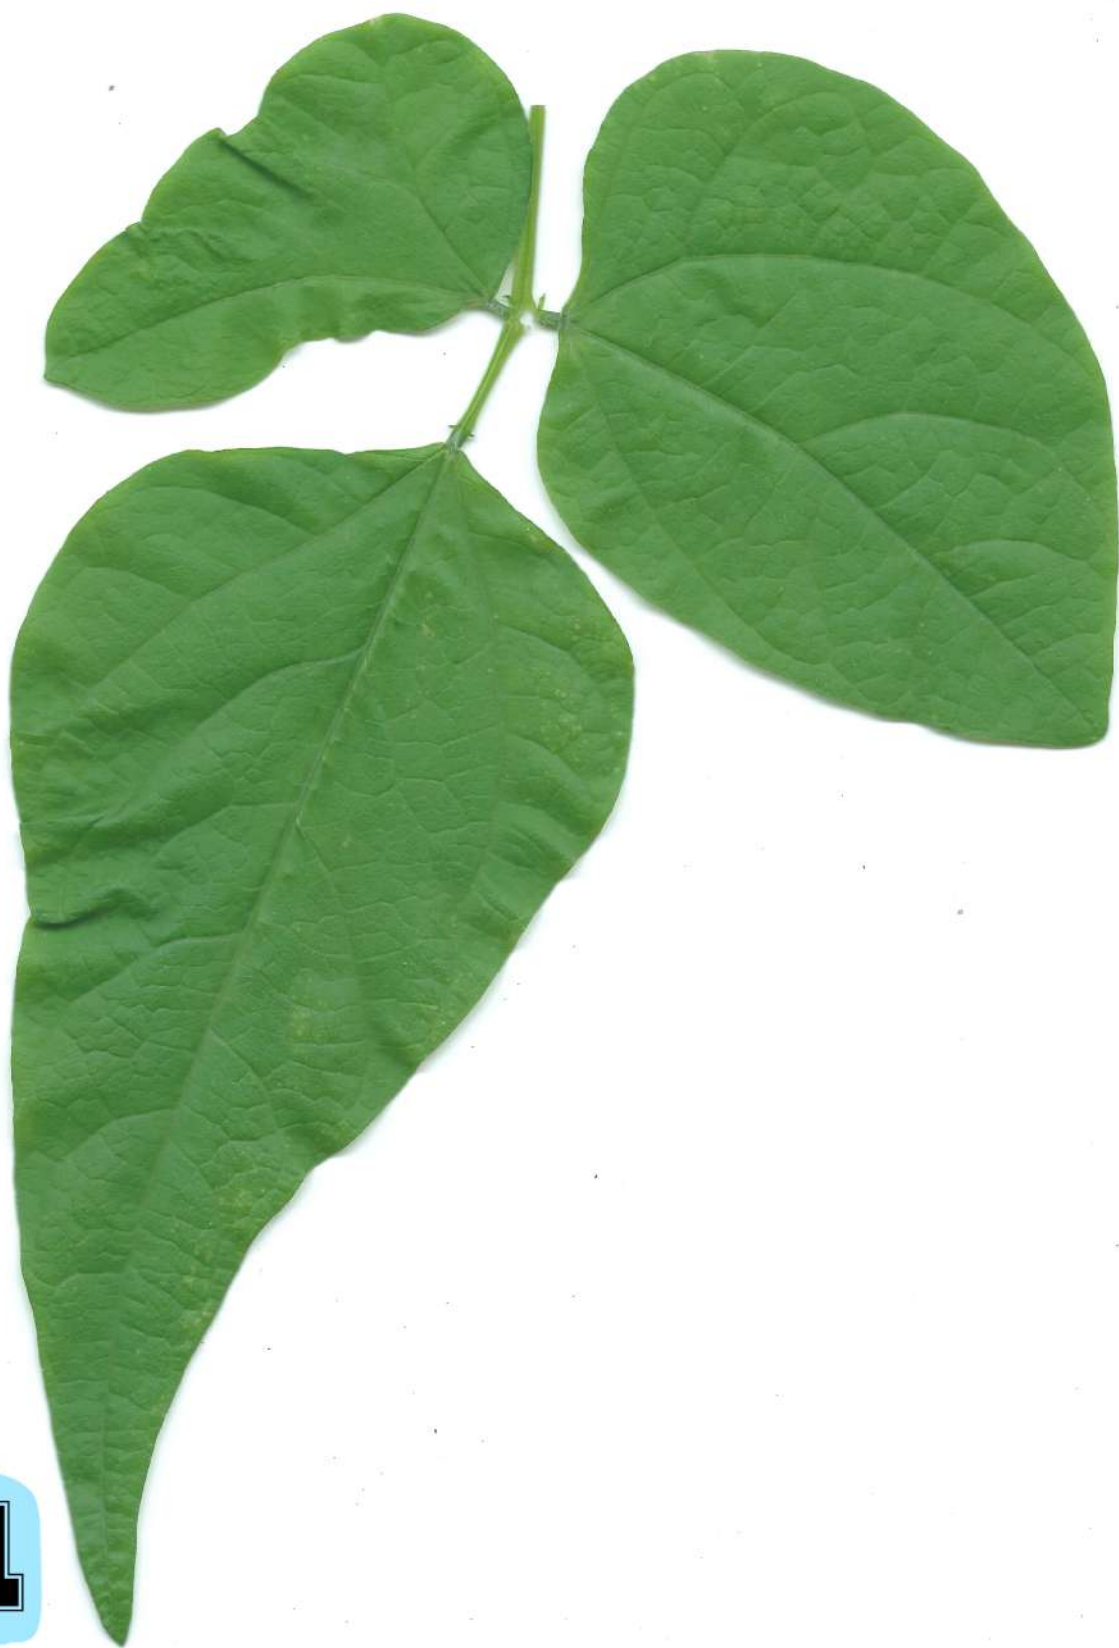

11-9-1

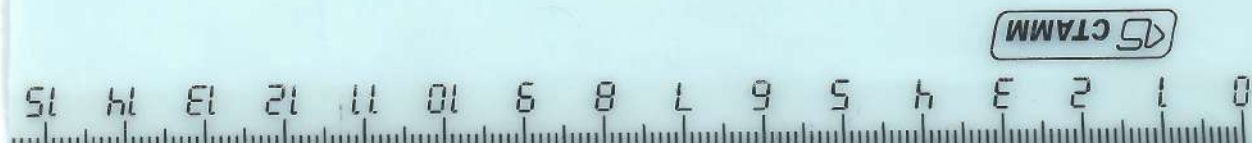

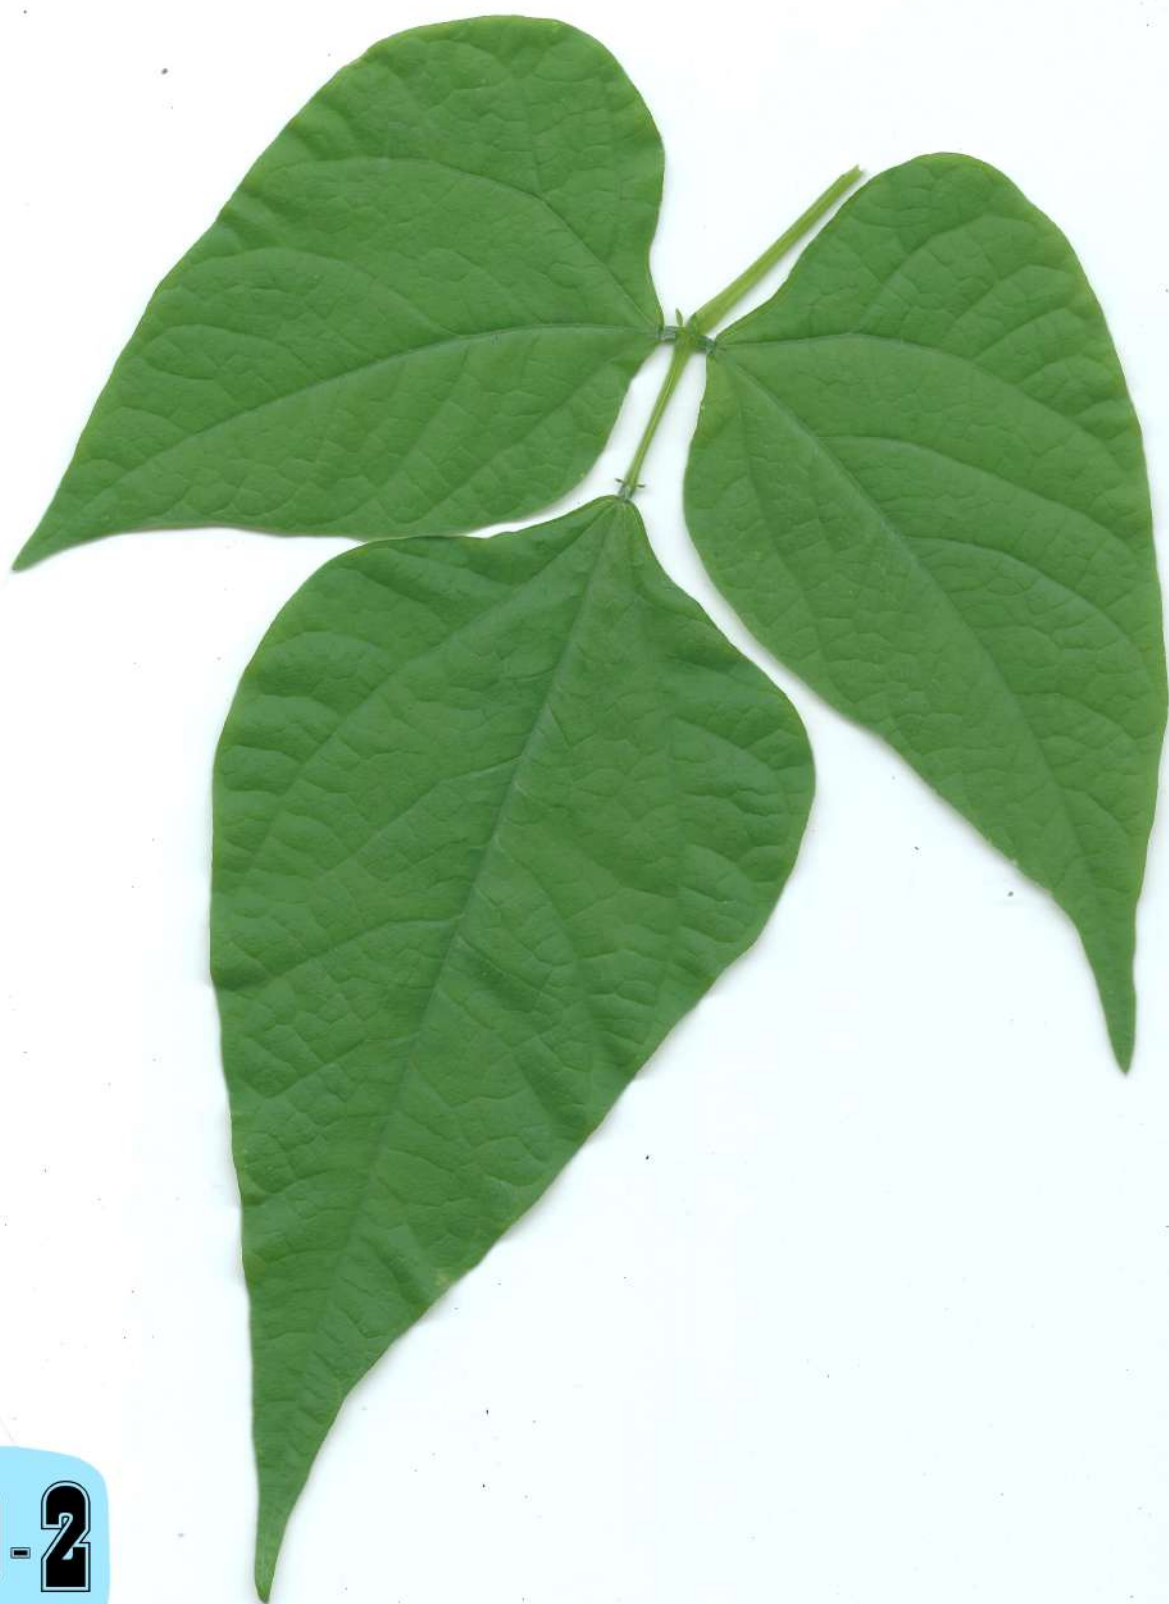

11-9-2

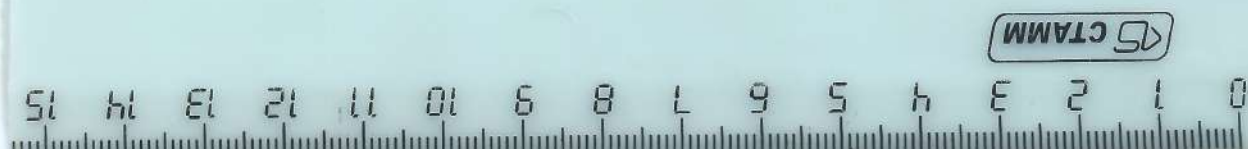



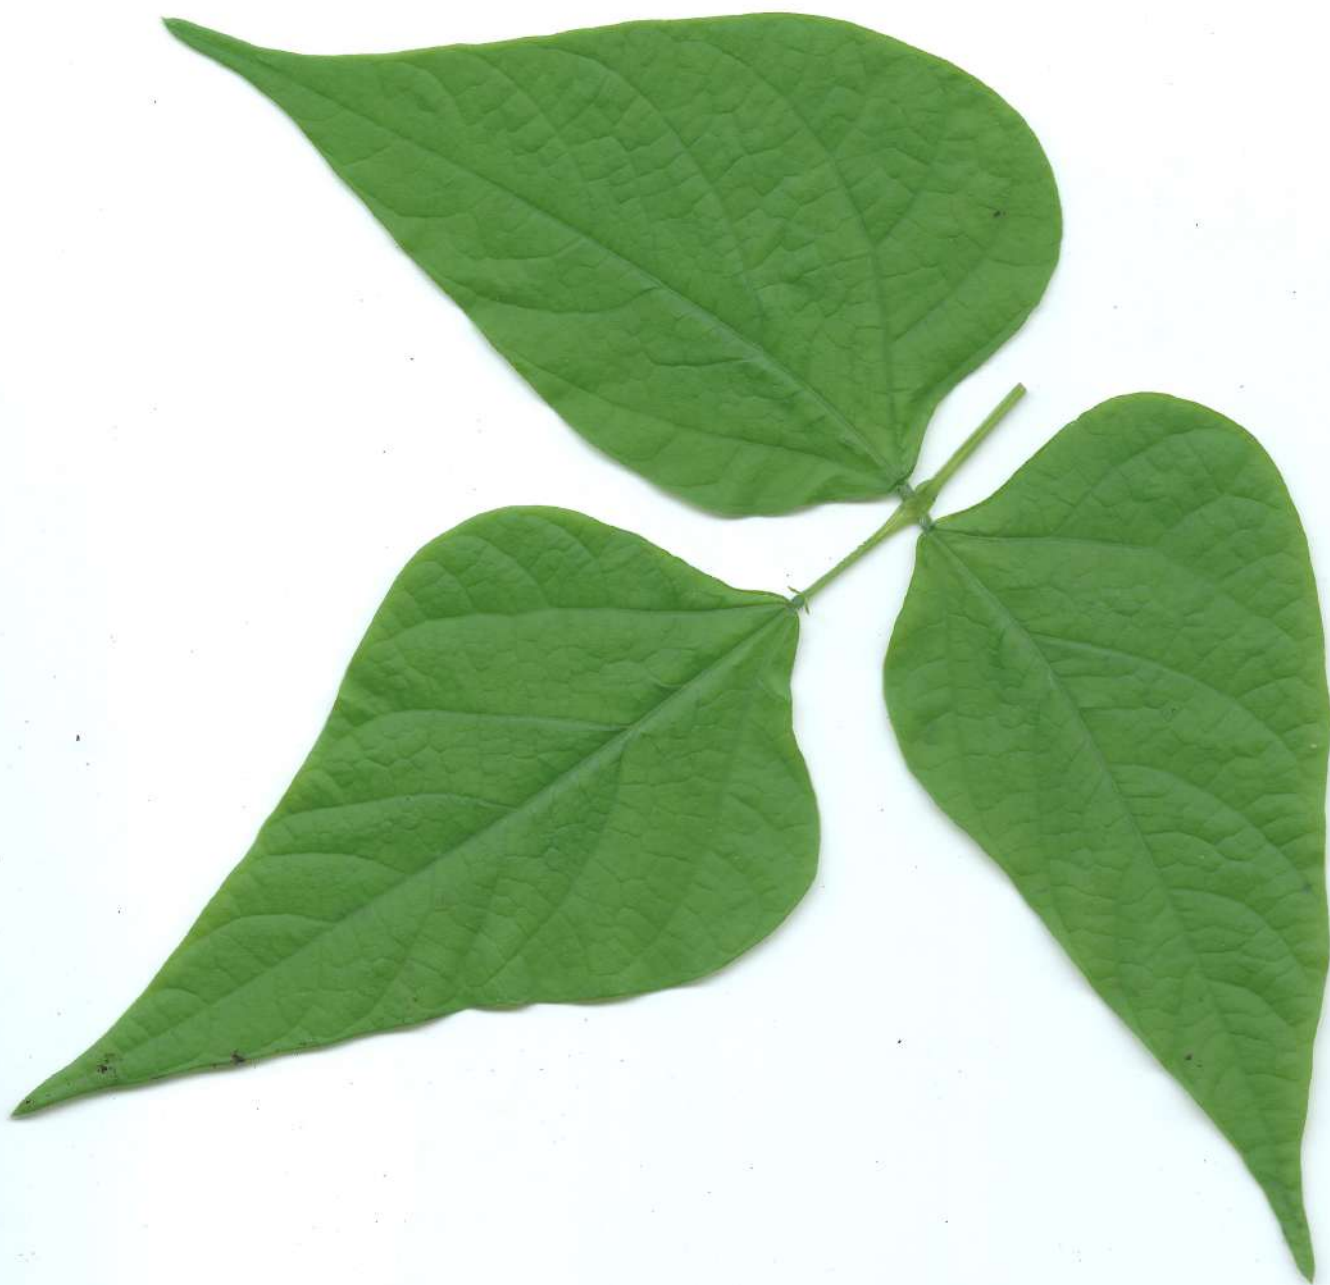

11-9-3

80

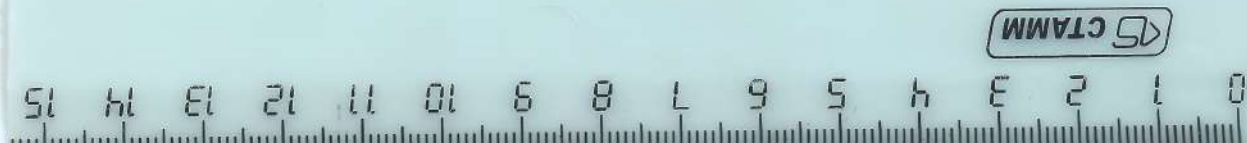

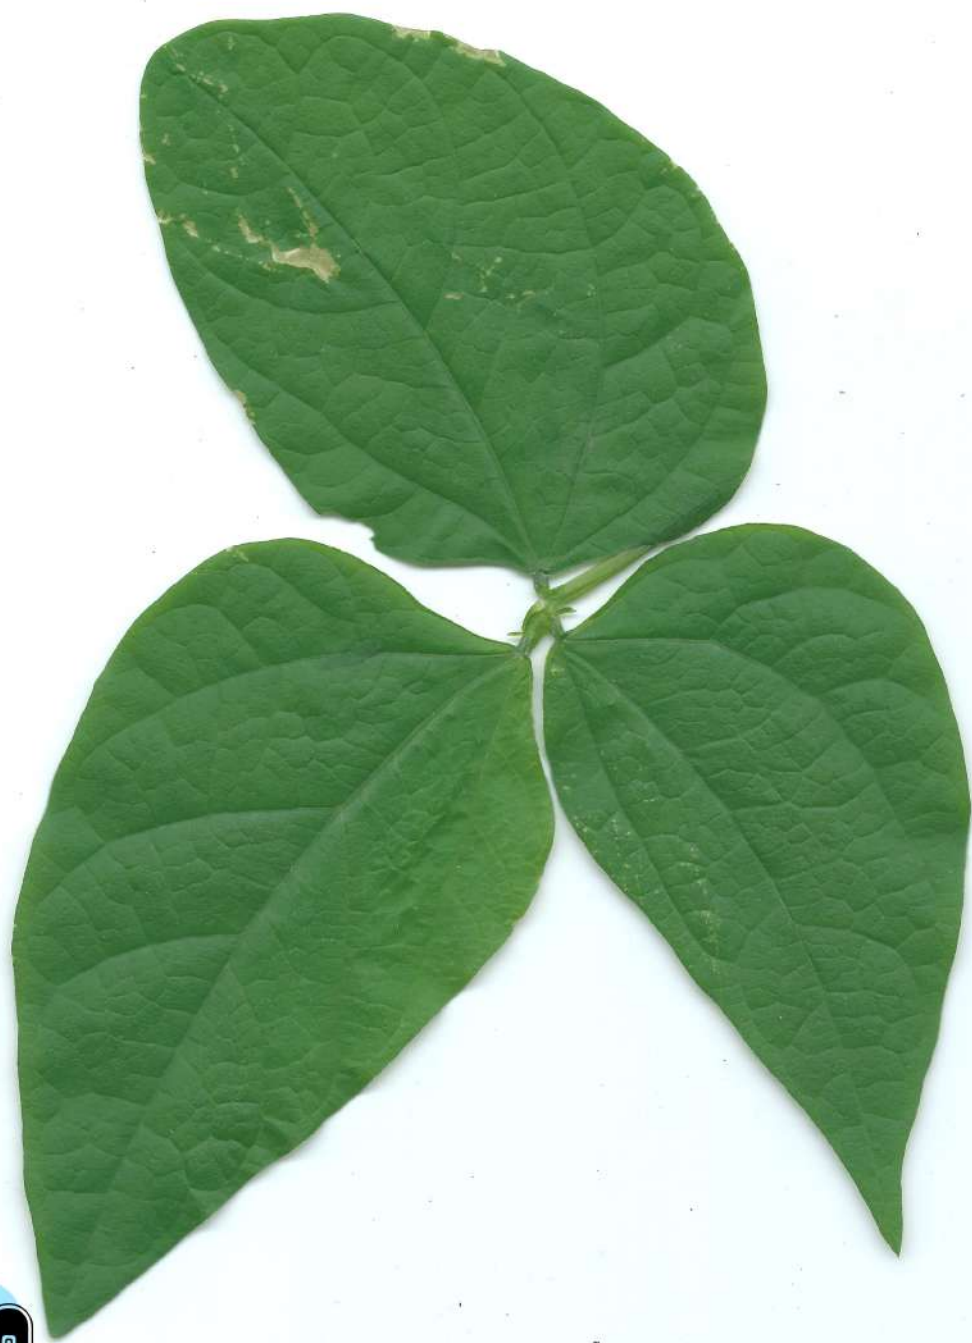

11-10-3

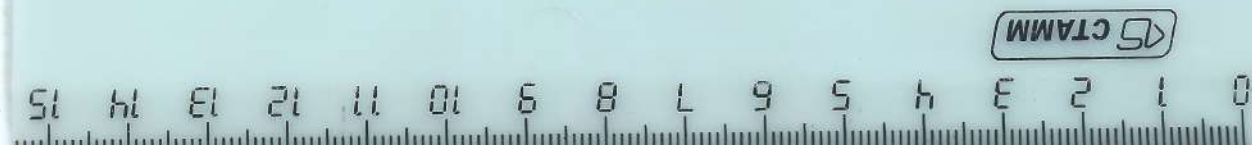

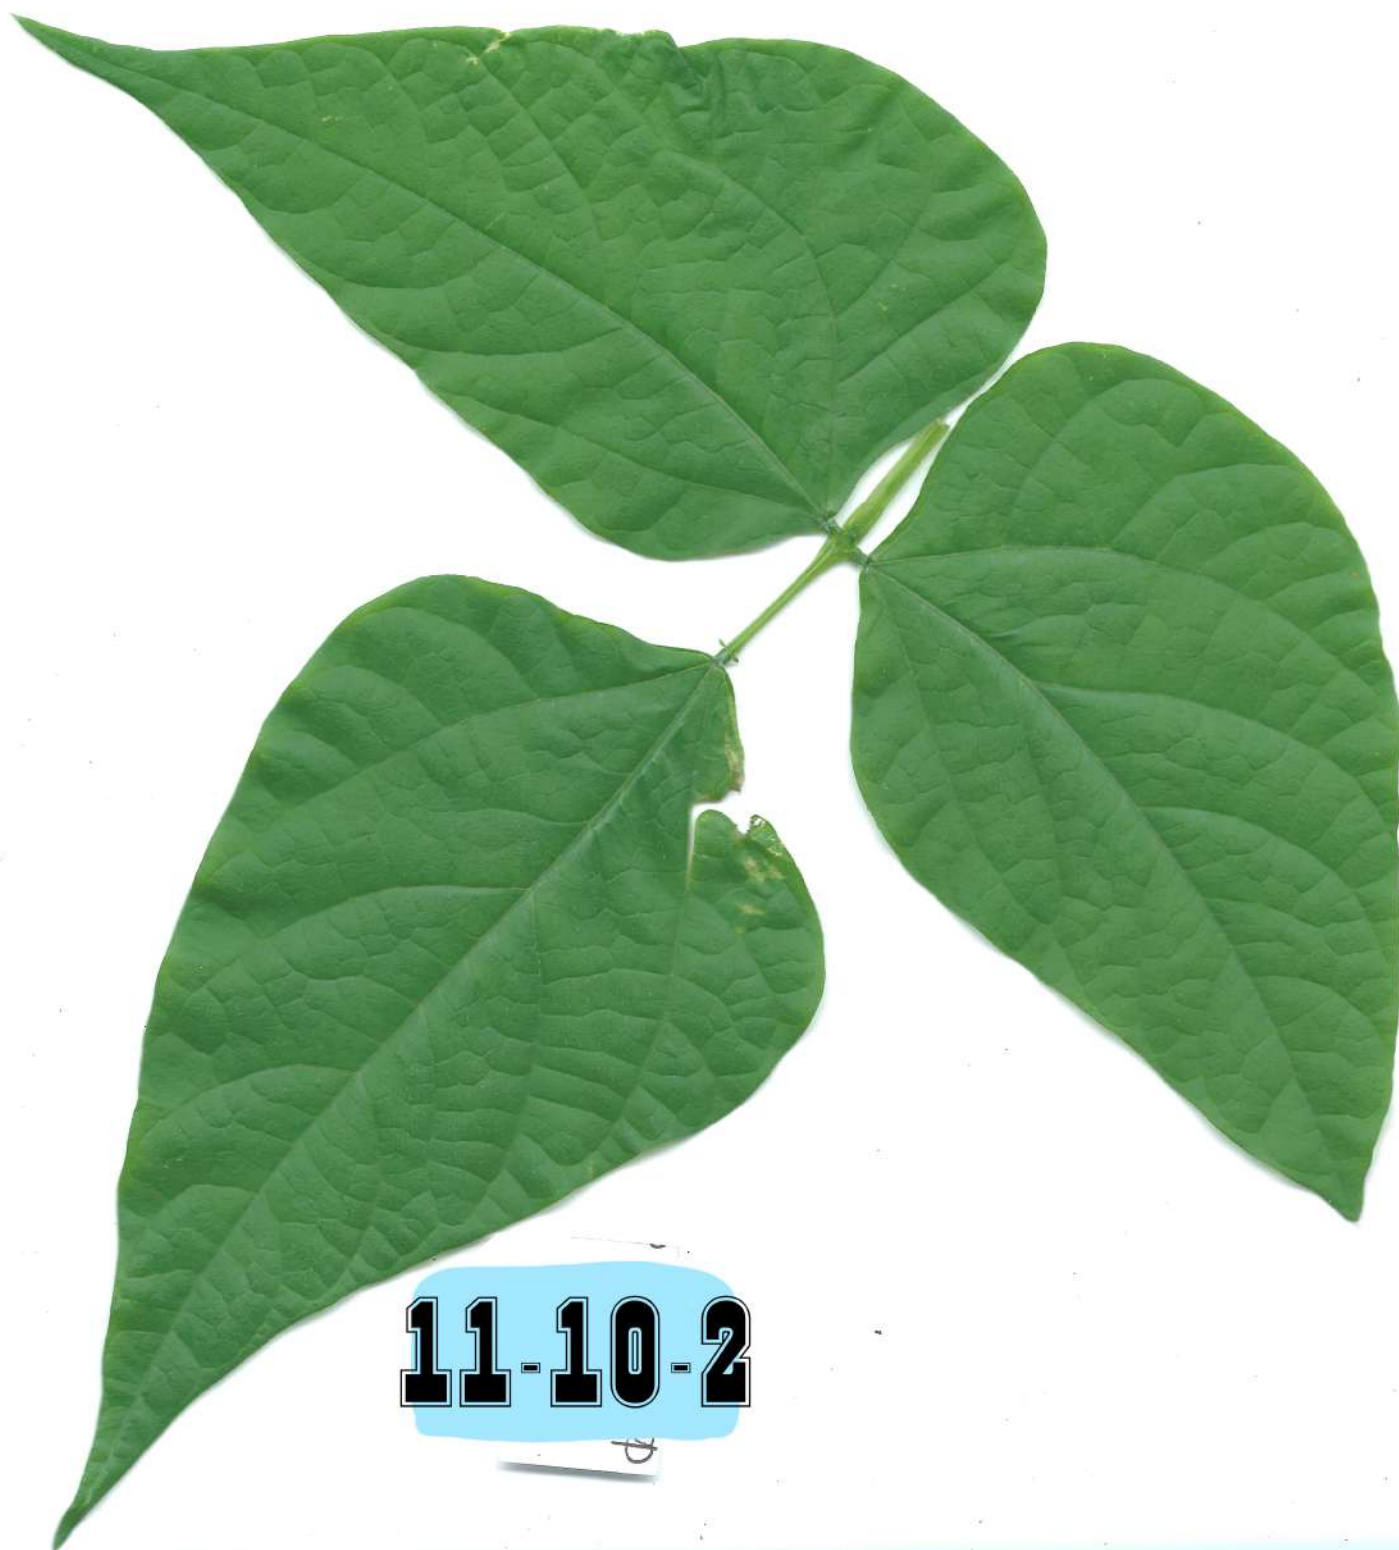

11-10-2

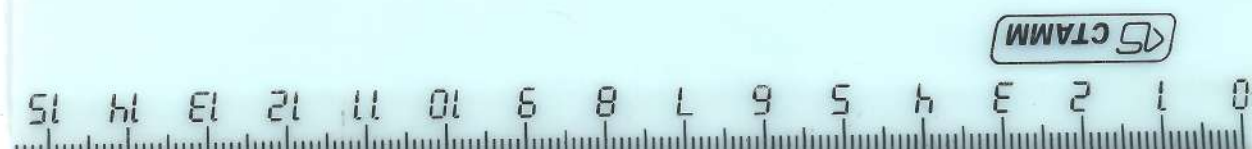



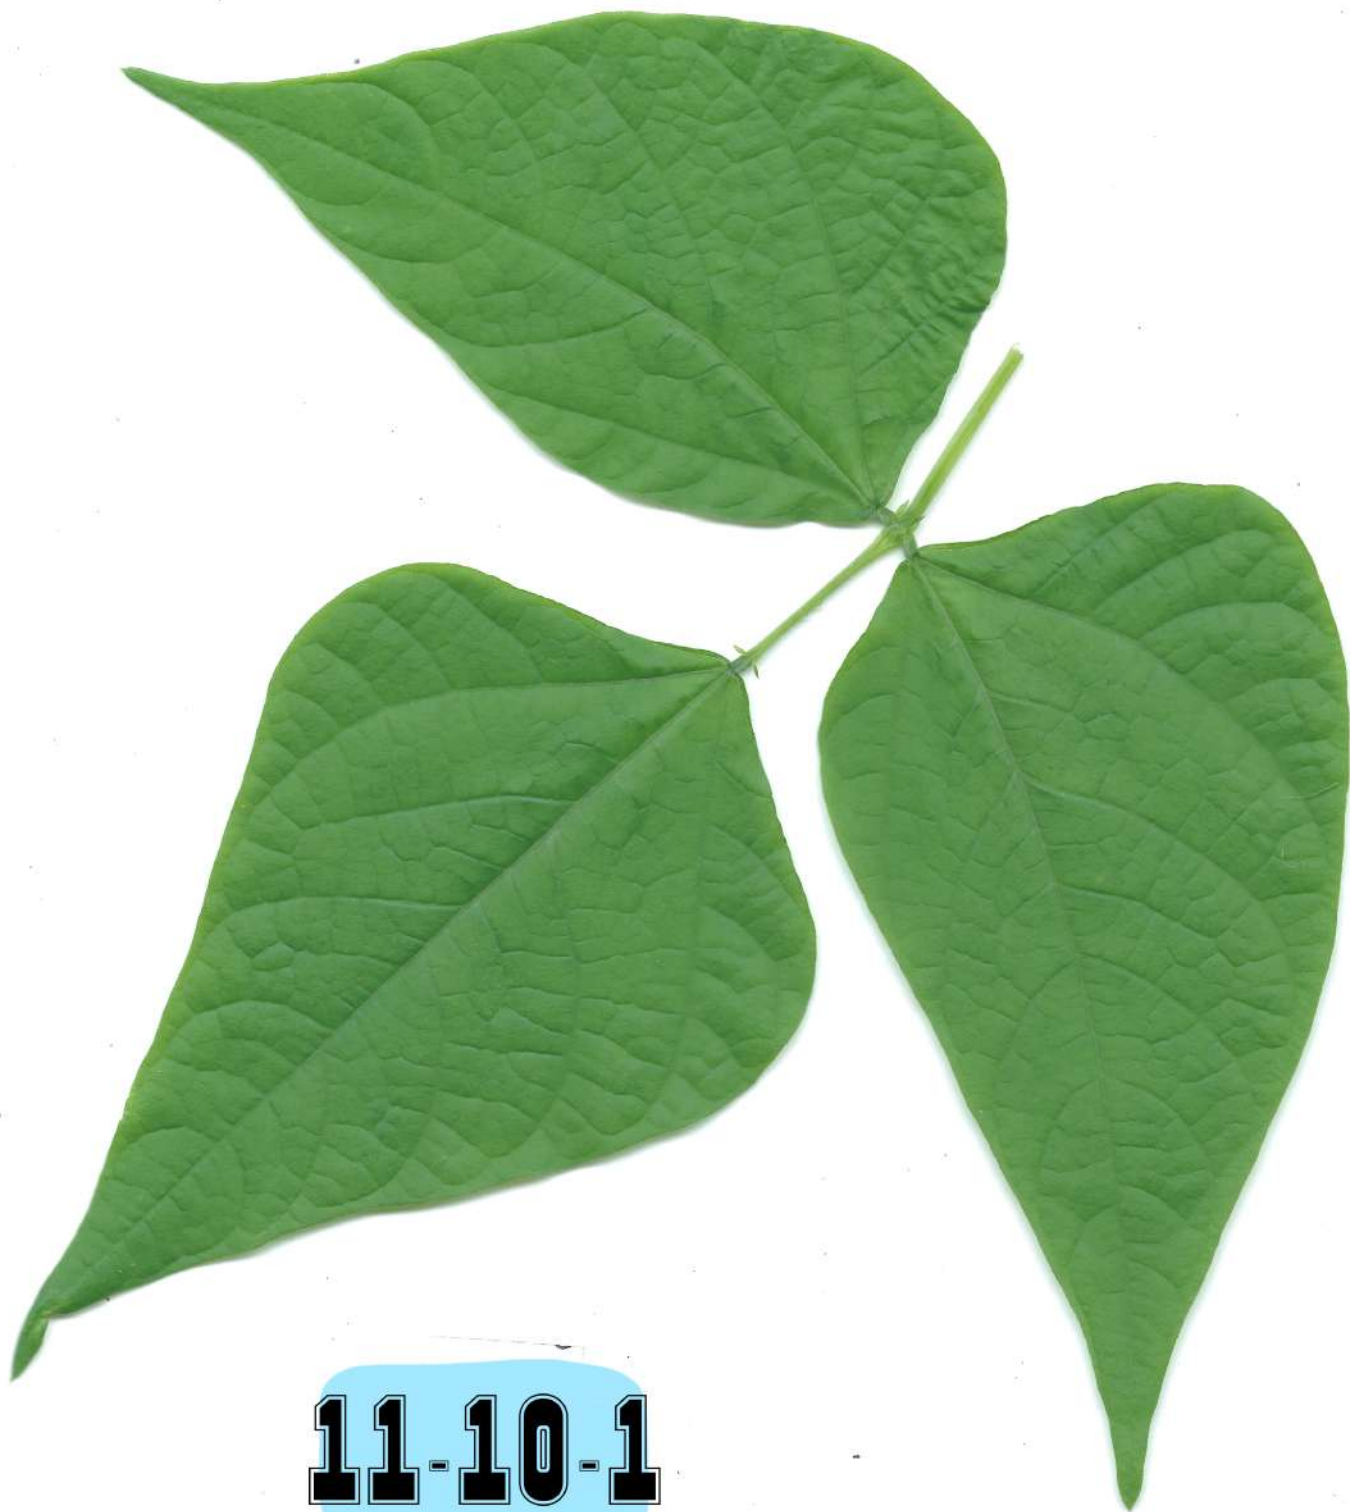

11-10-1

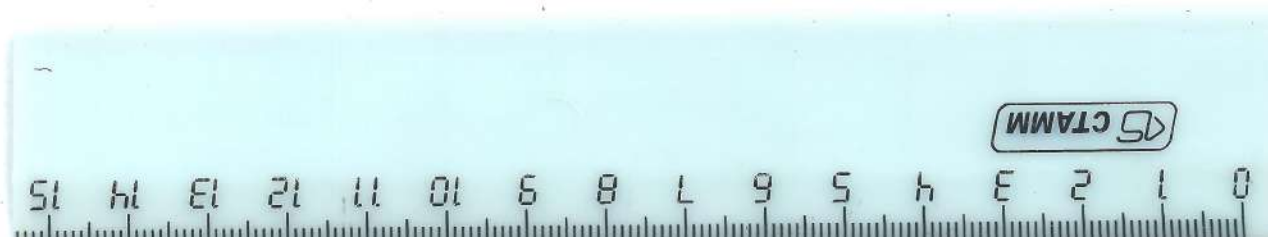



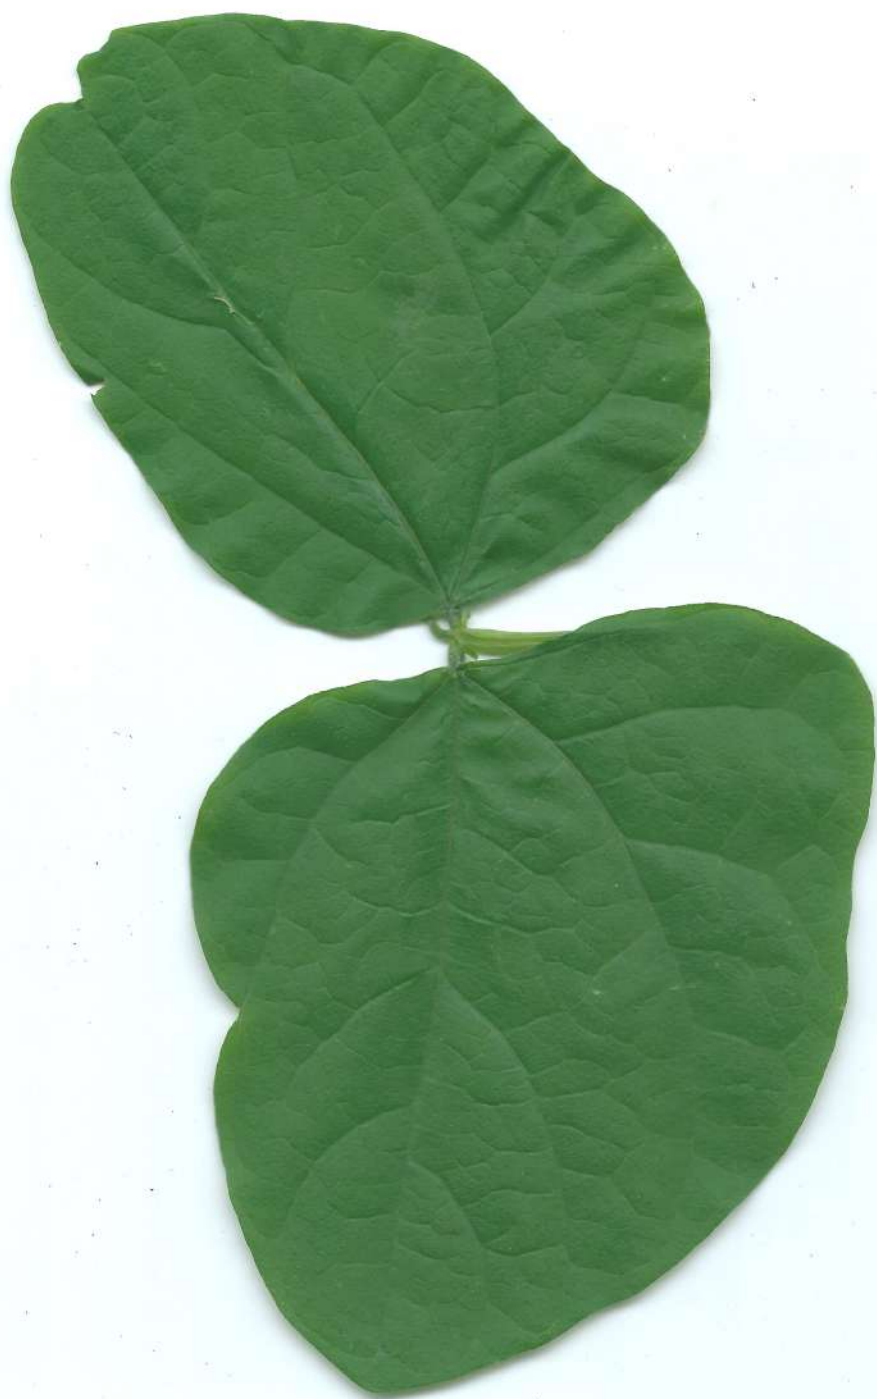

**11-11-3**

Ø

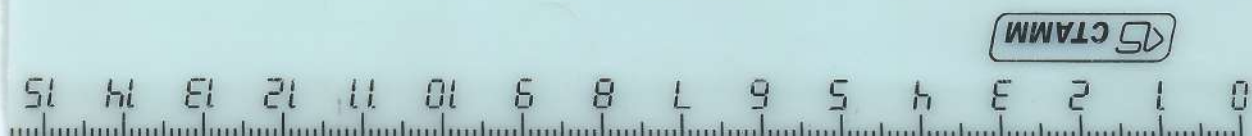

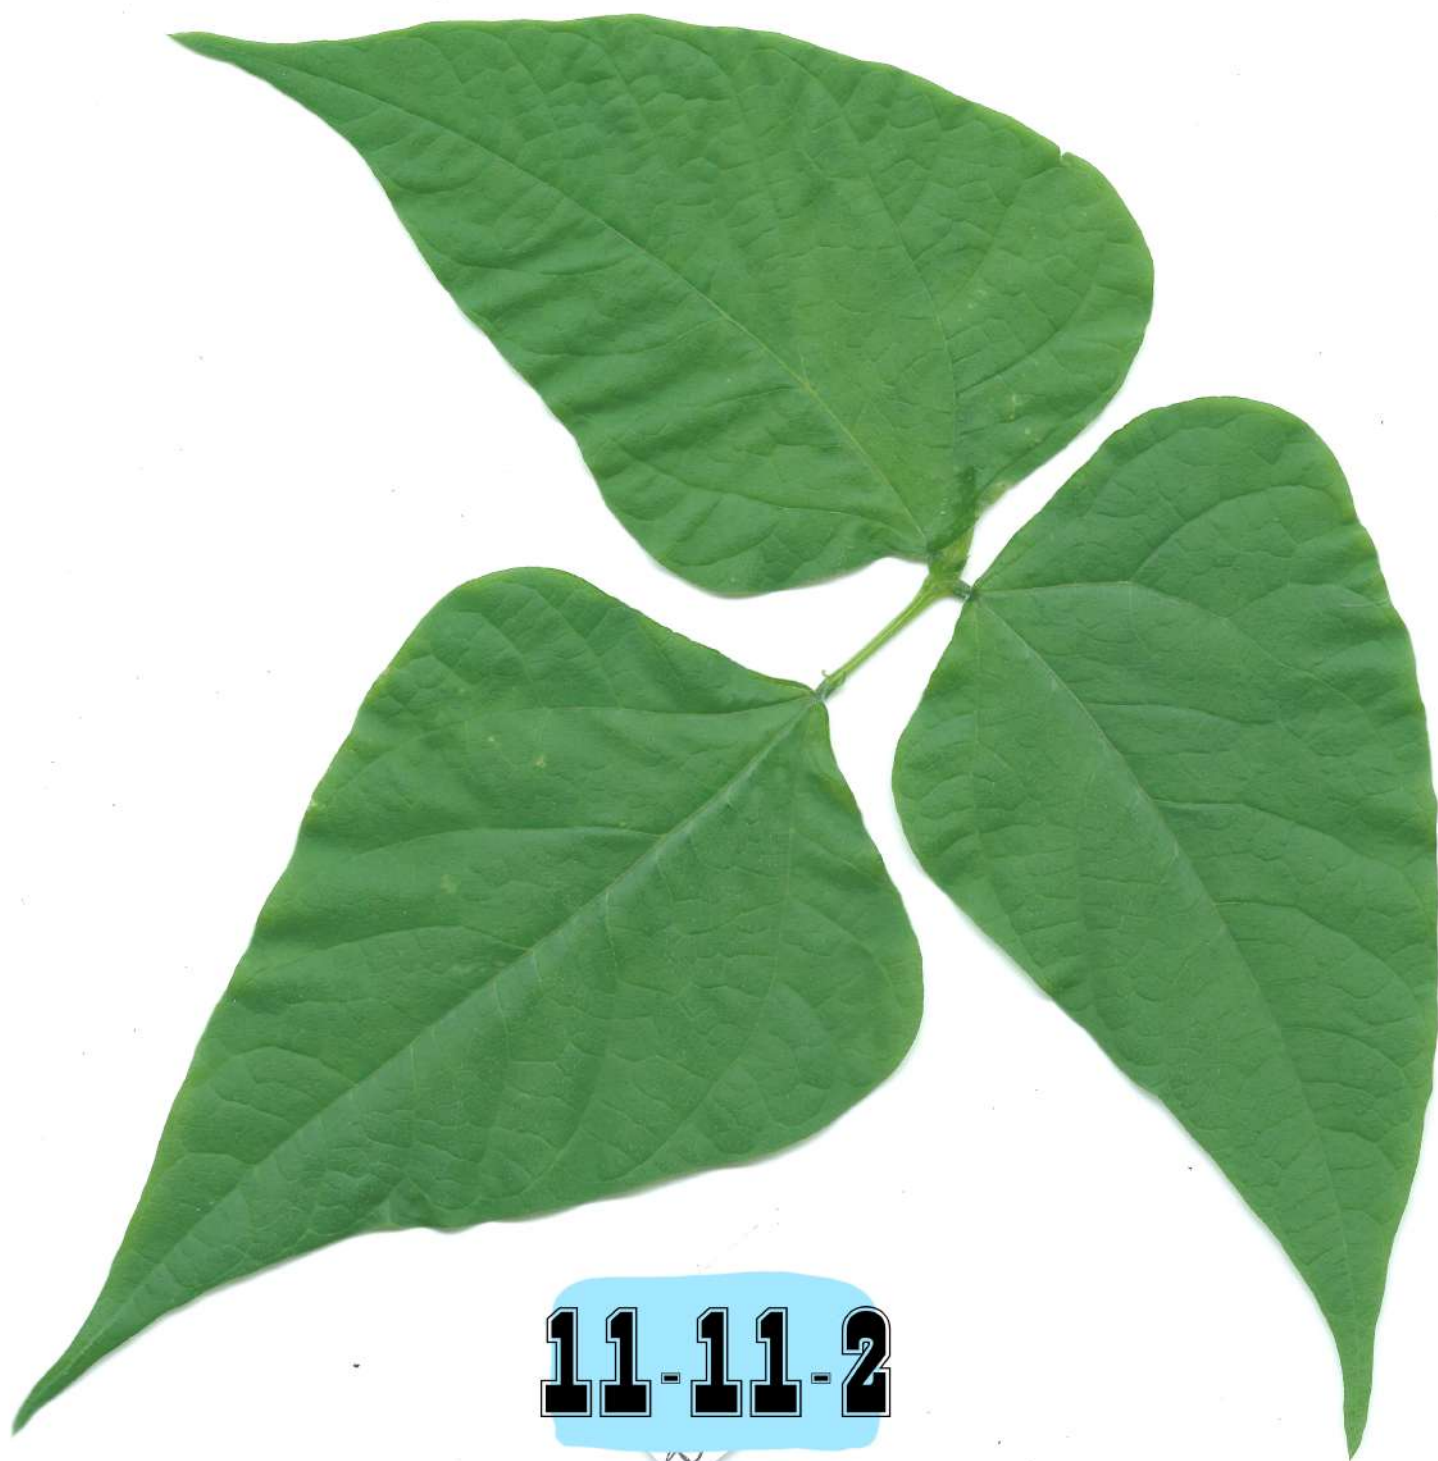

**11-11-2**

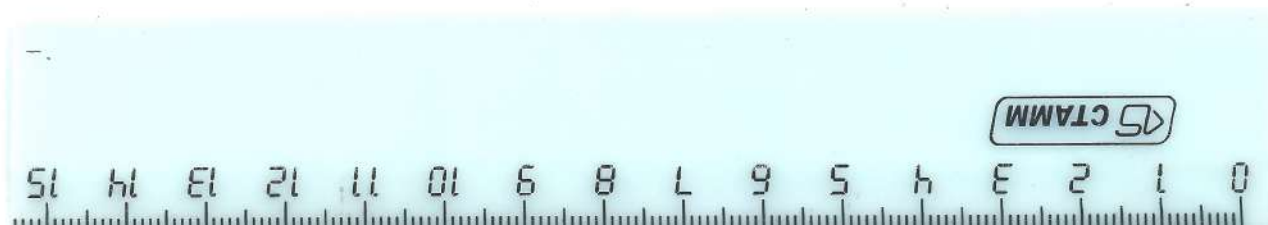

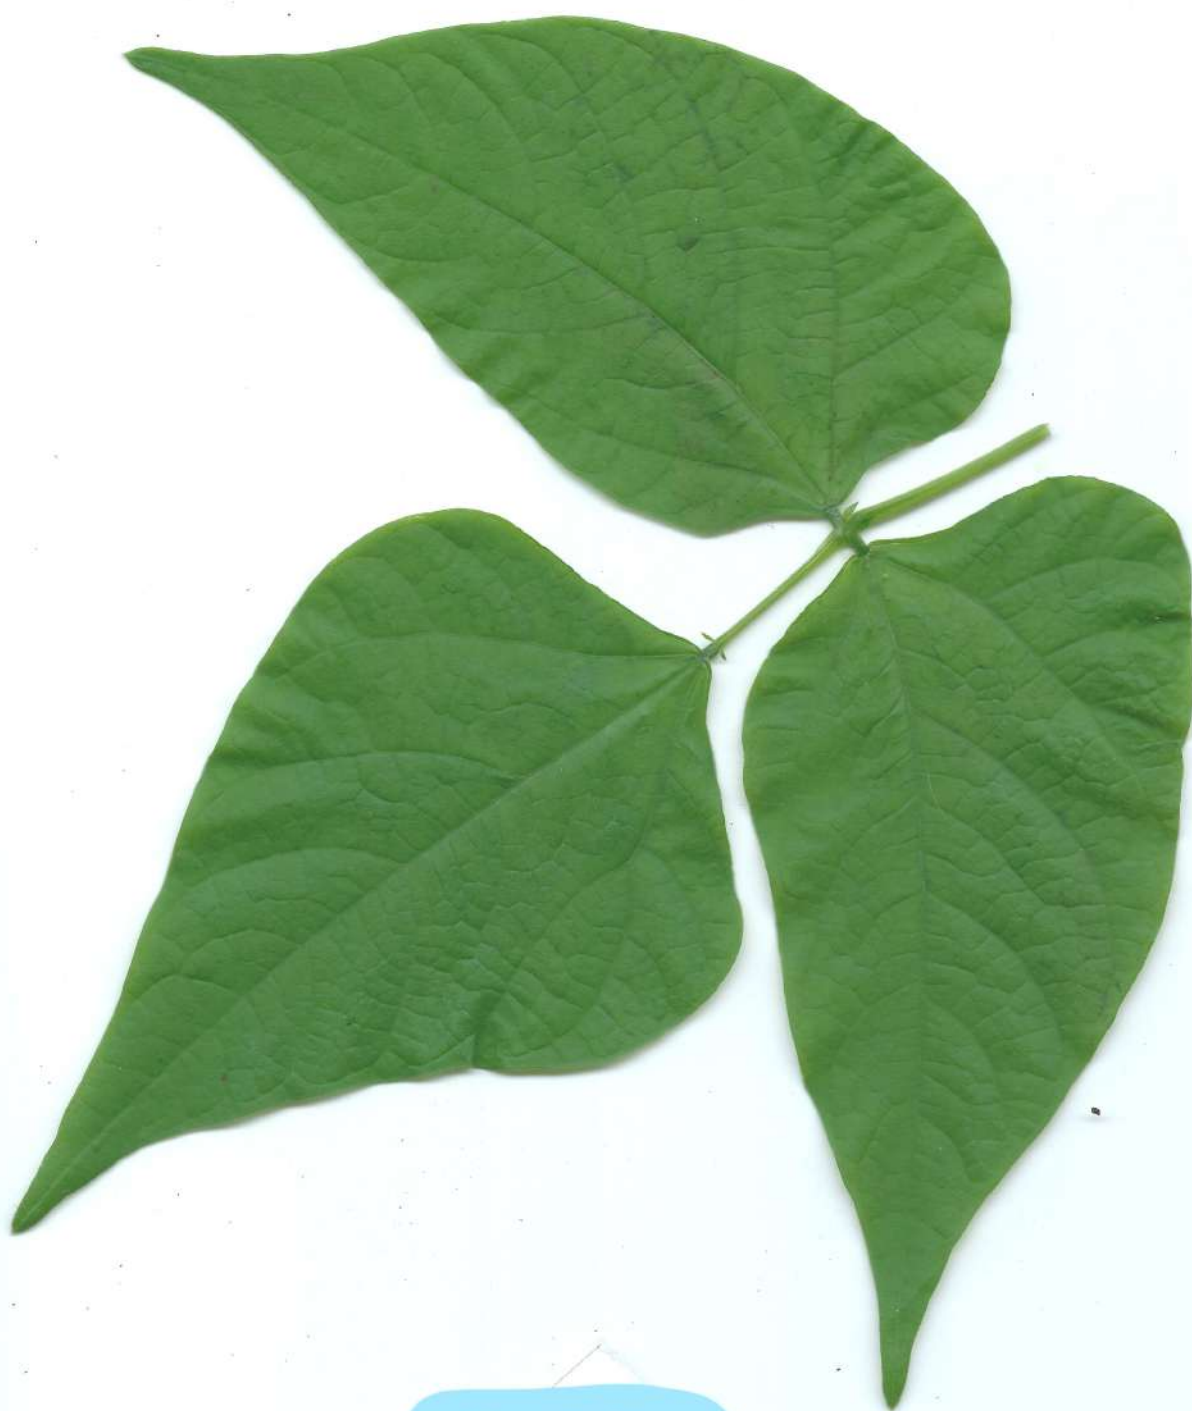

11-11-1

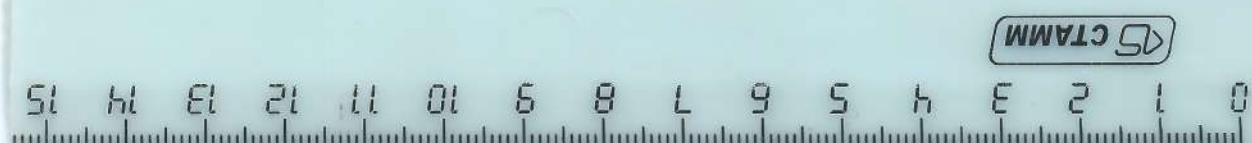



11-12-3

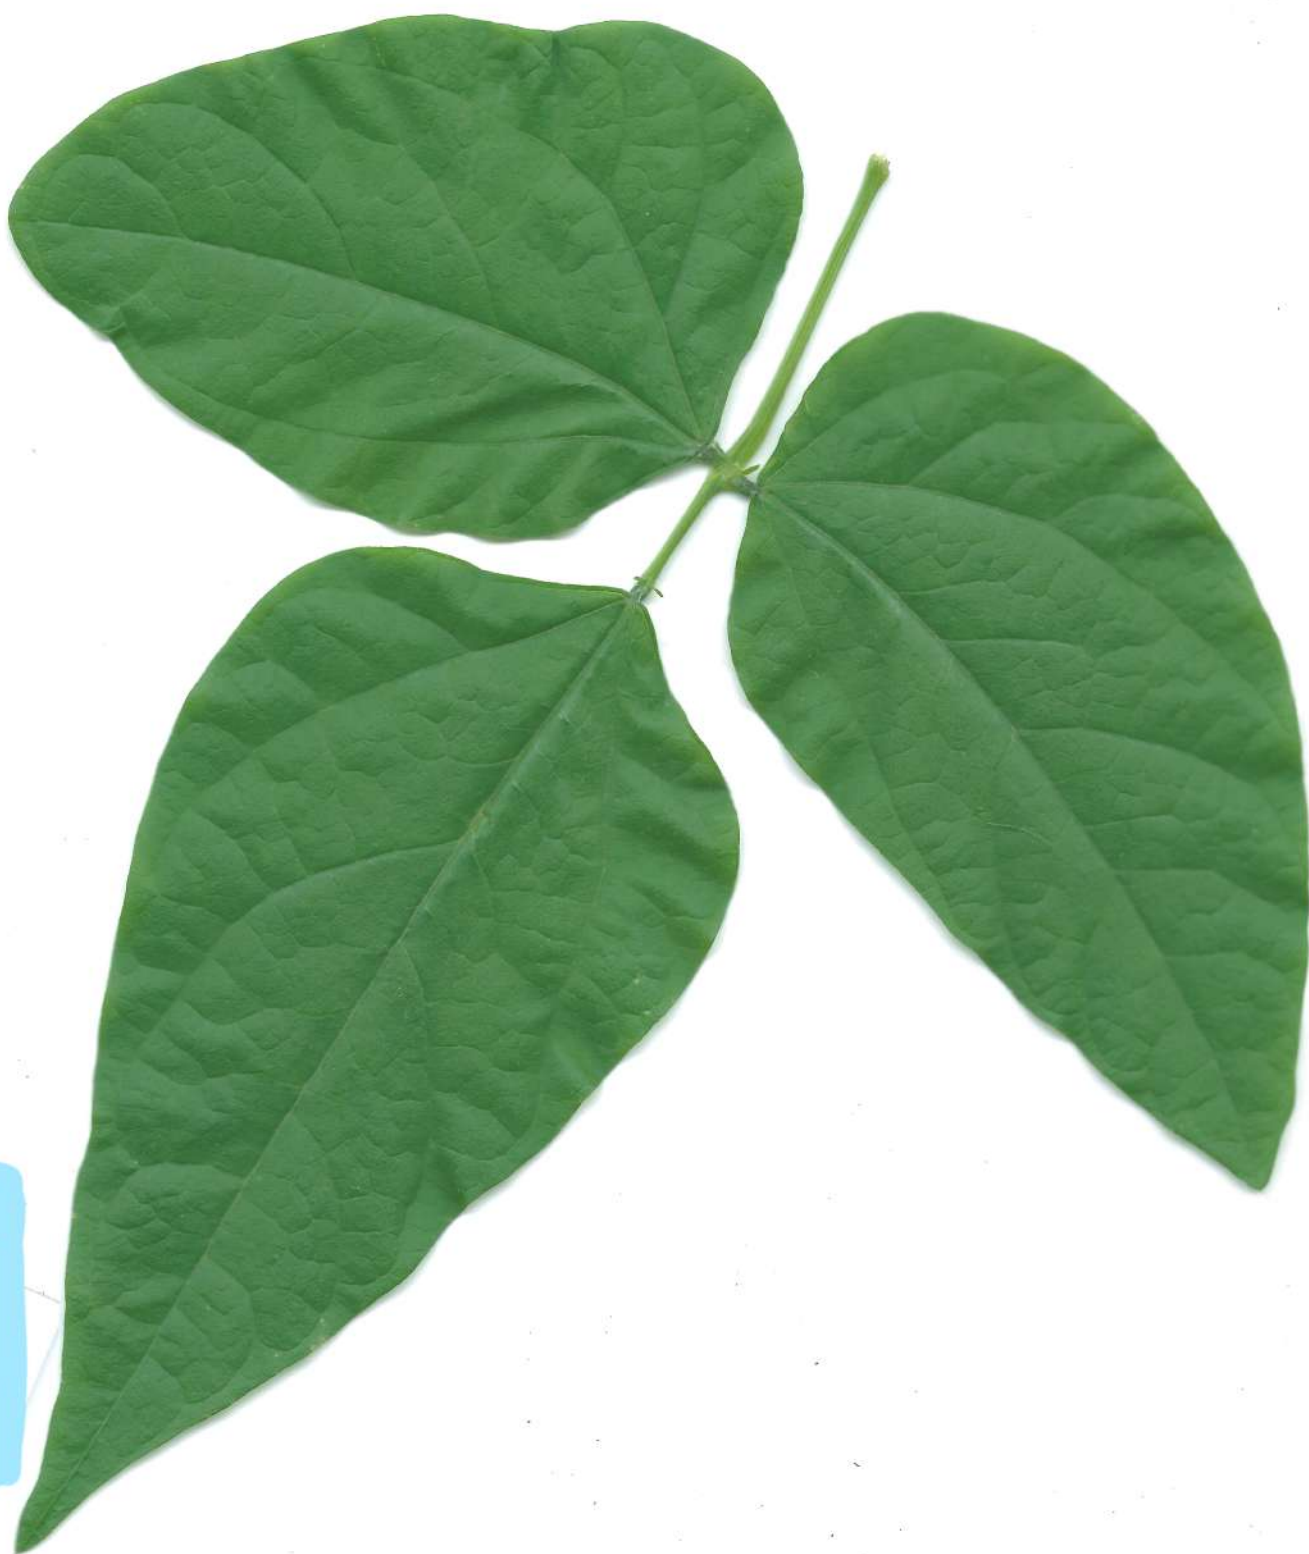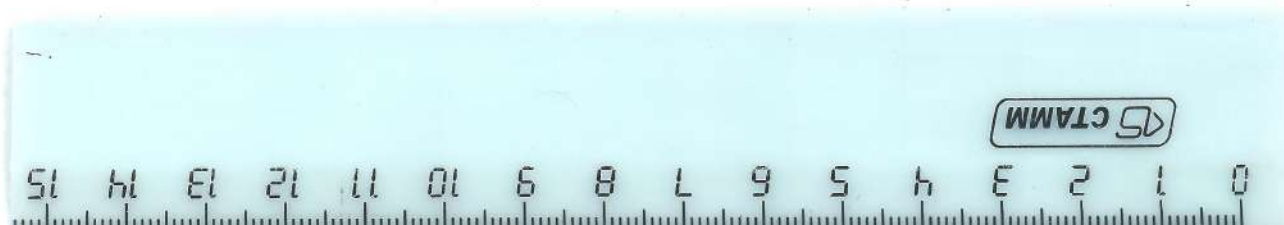



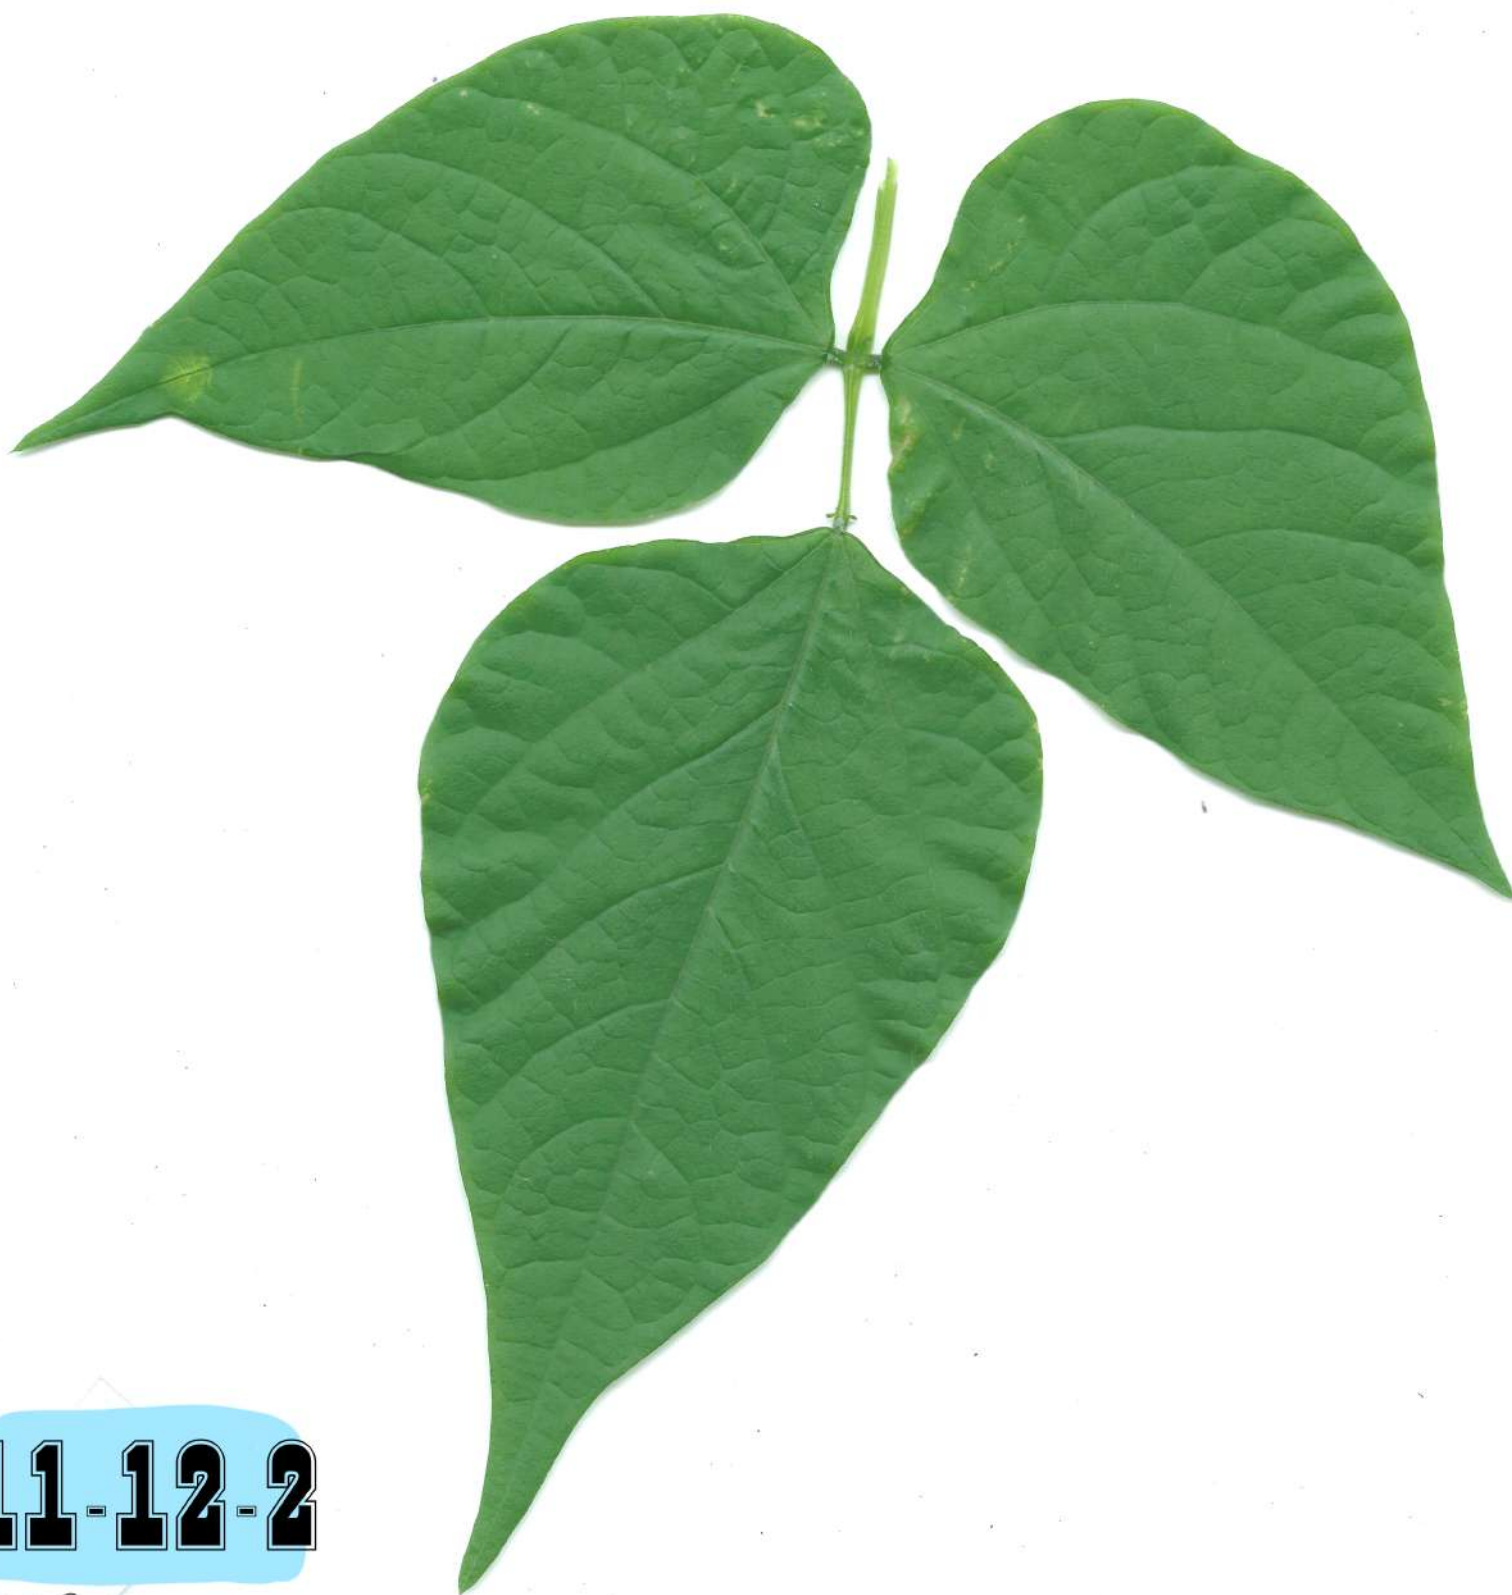

**11-12-2**

8

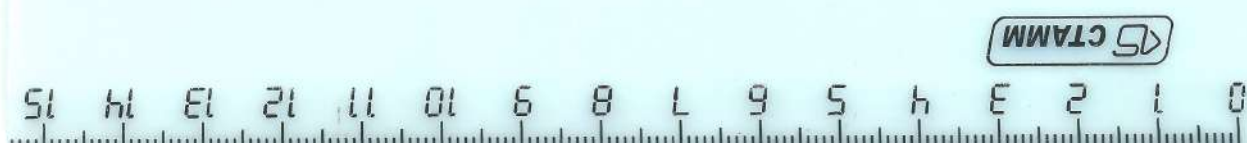

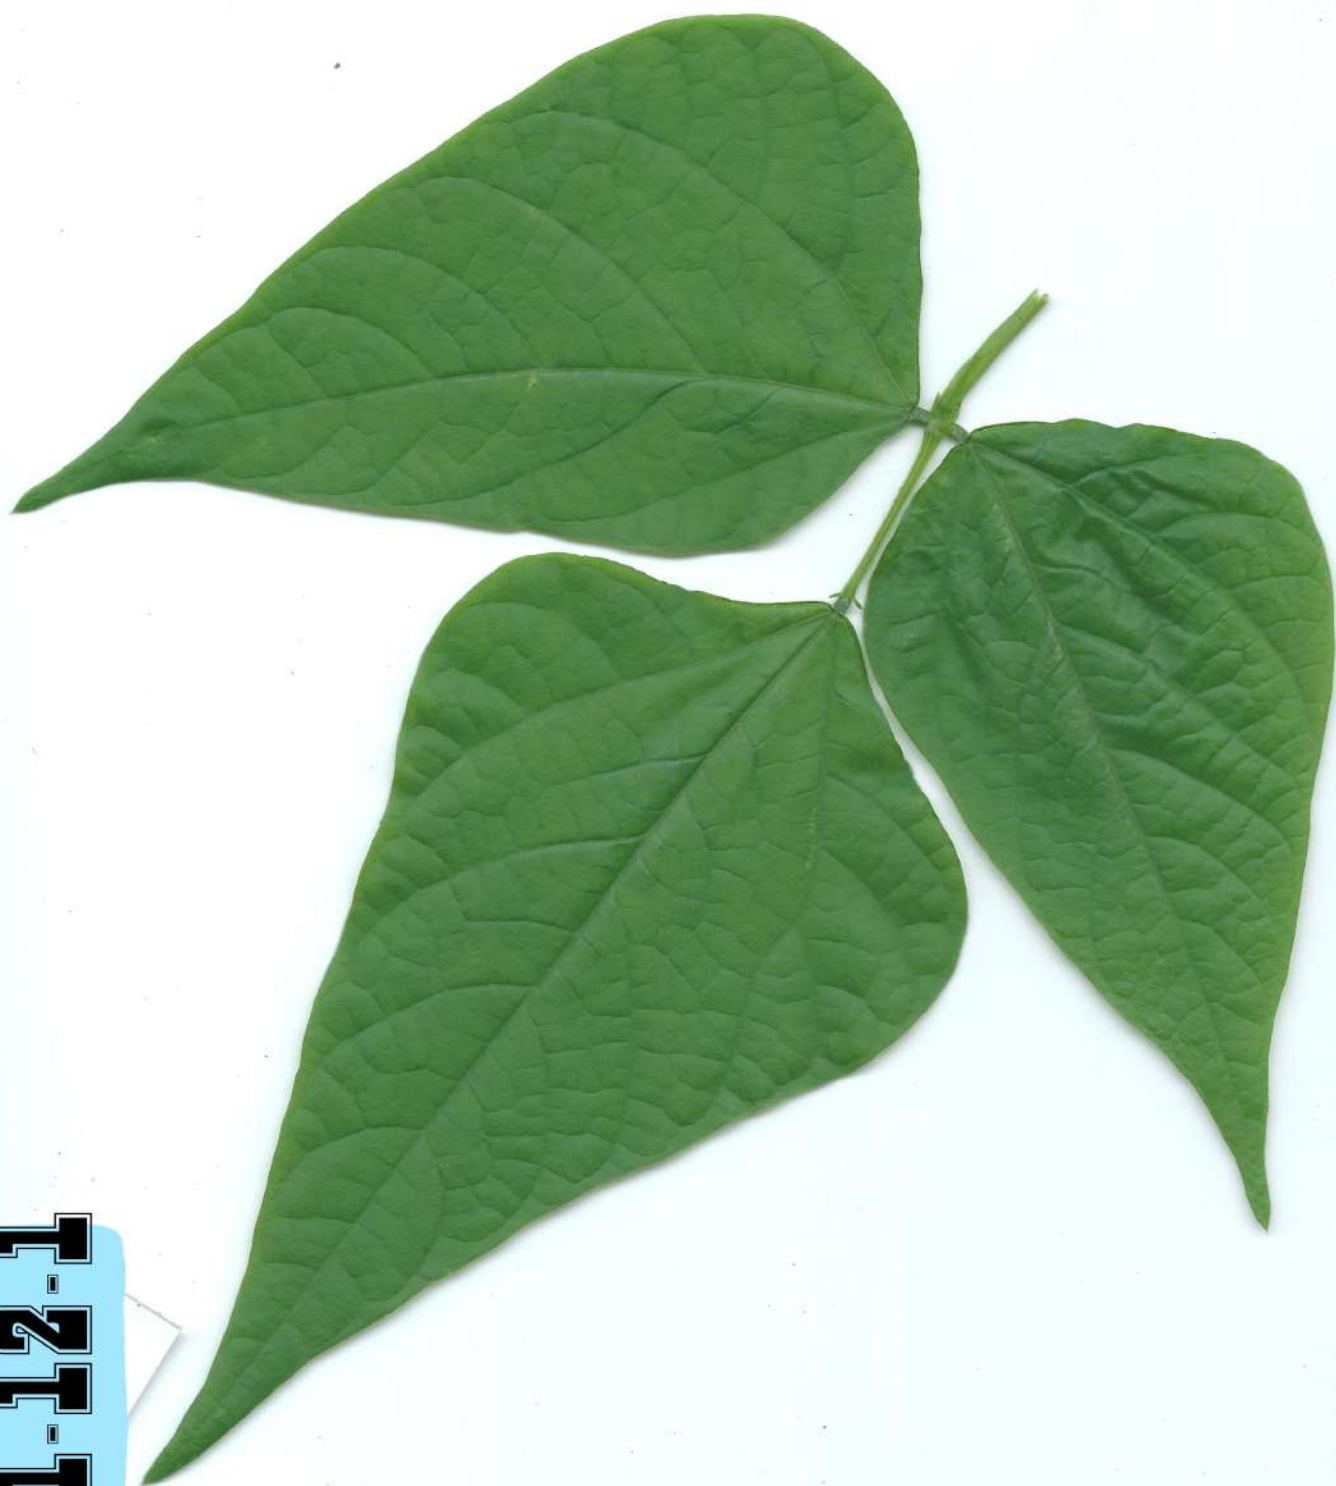

11-12-1

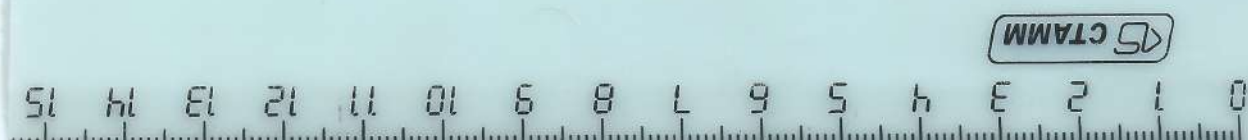

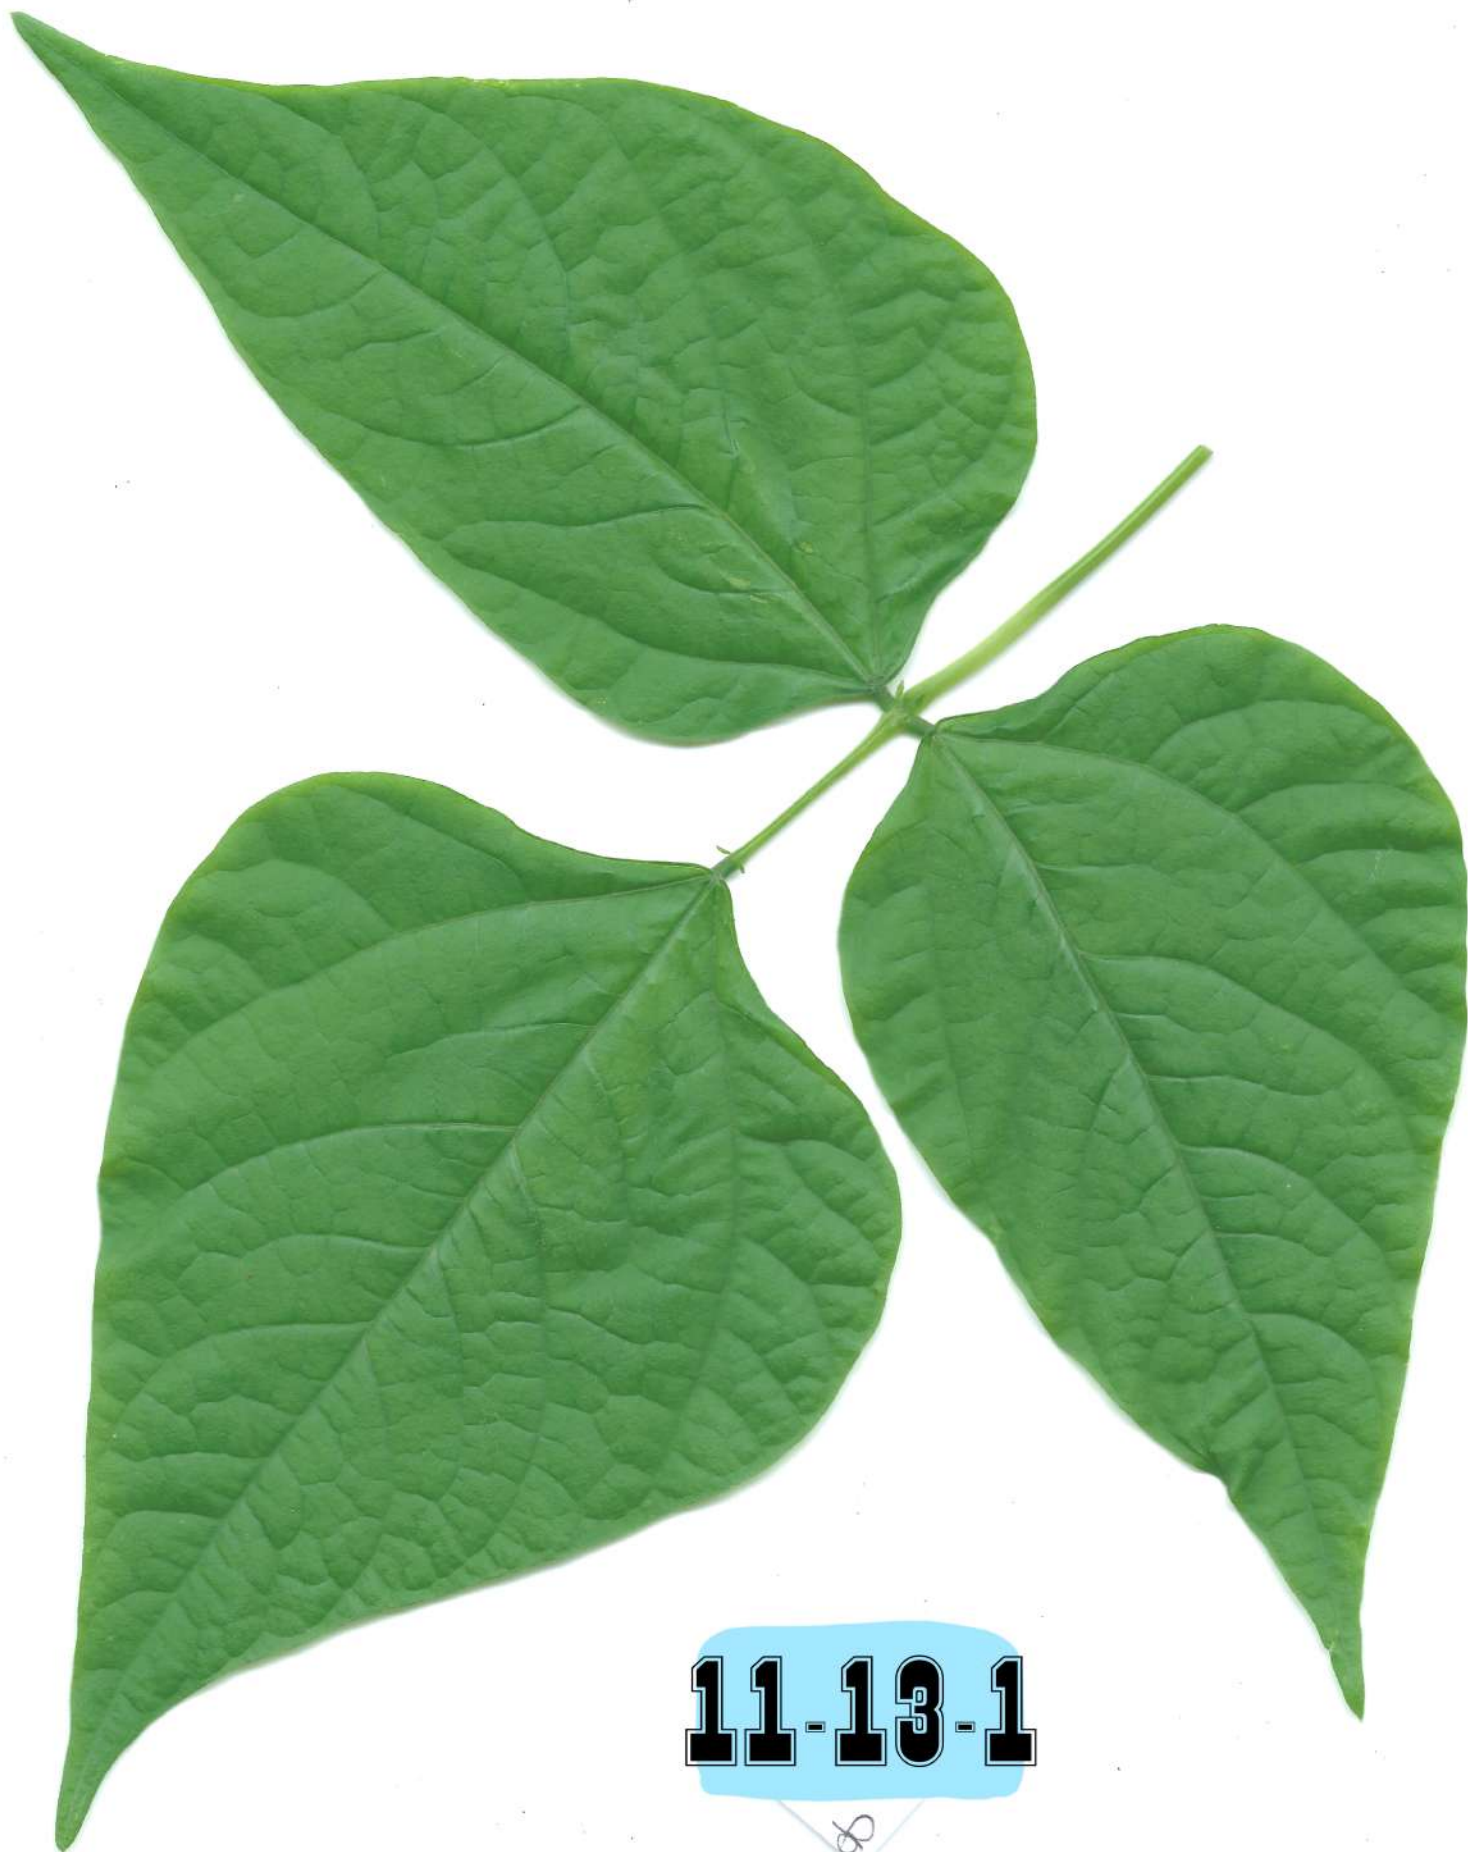

11-13-1

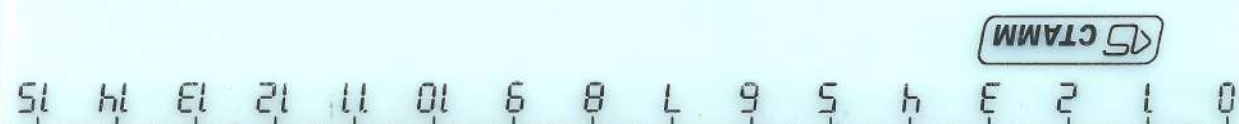



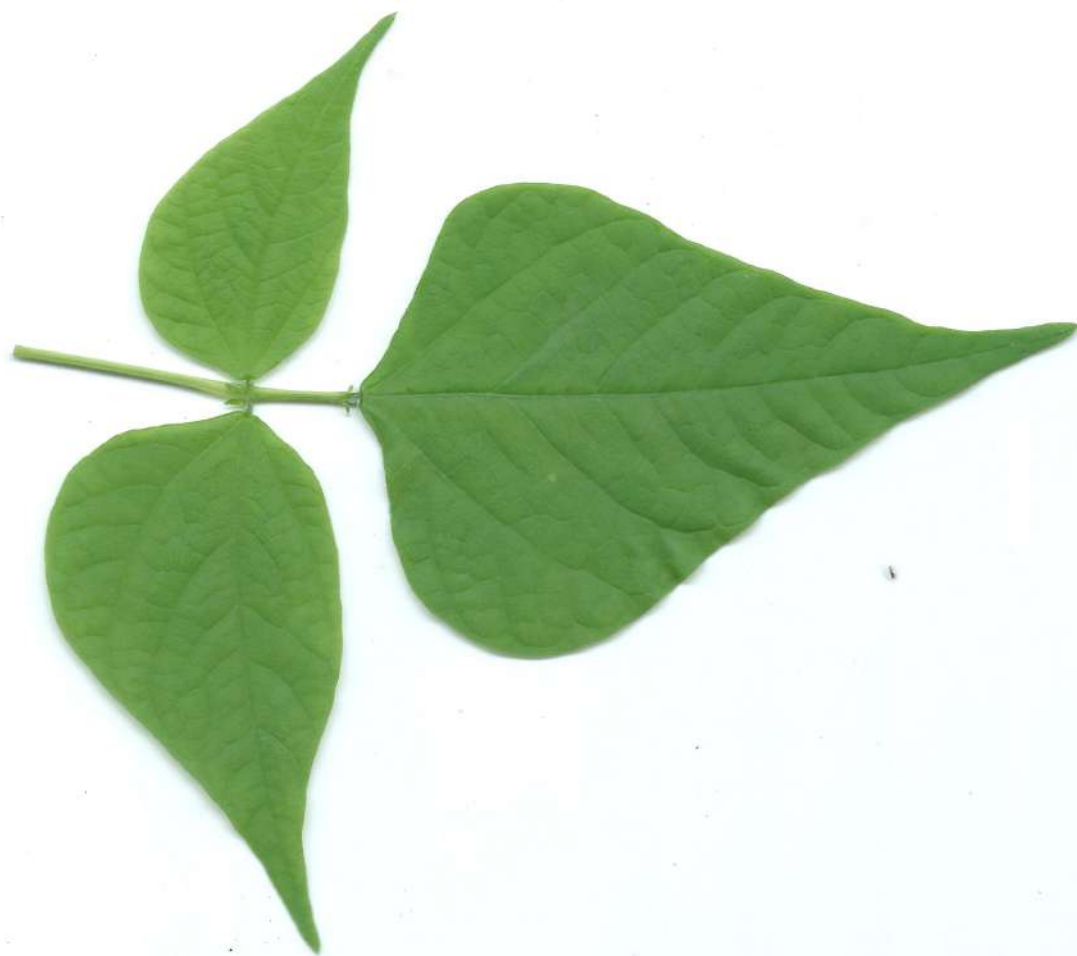

**11-13-2**

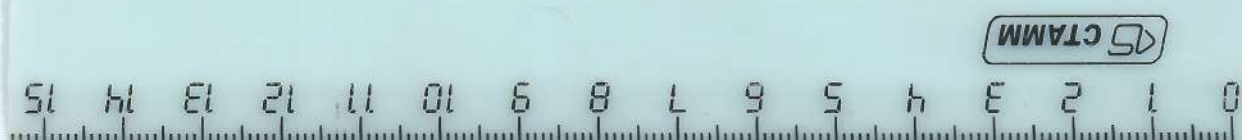



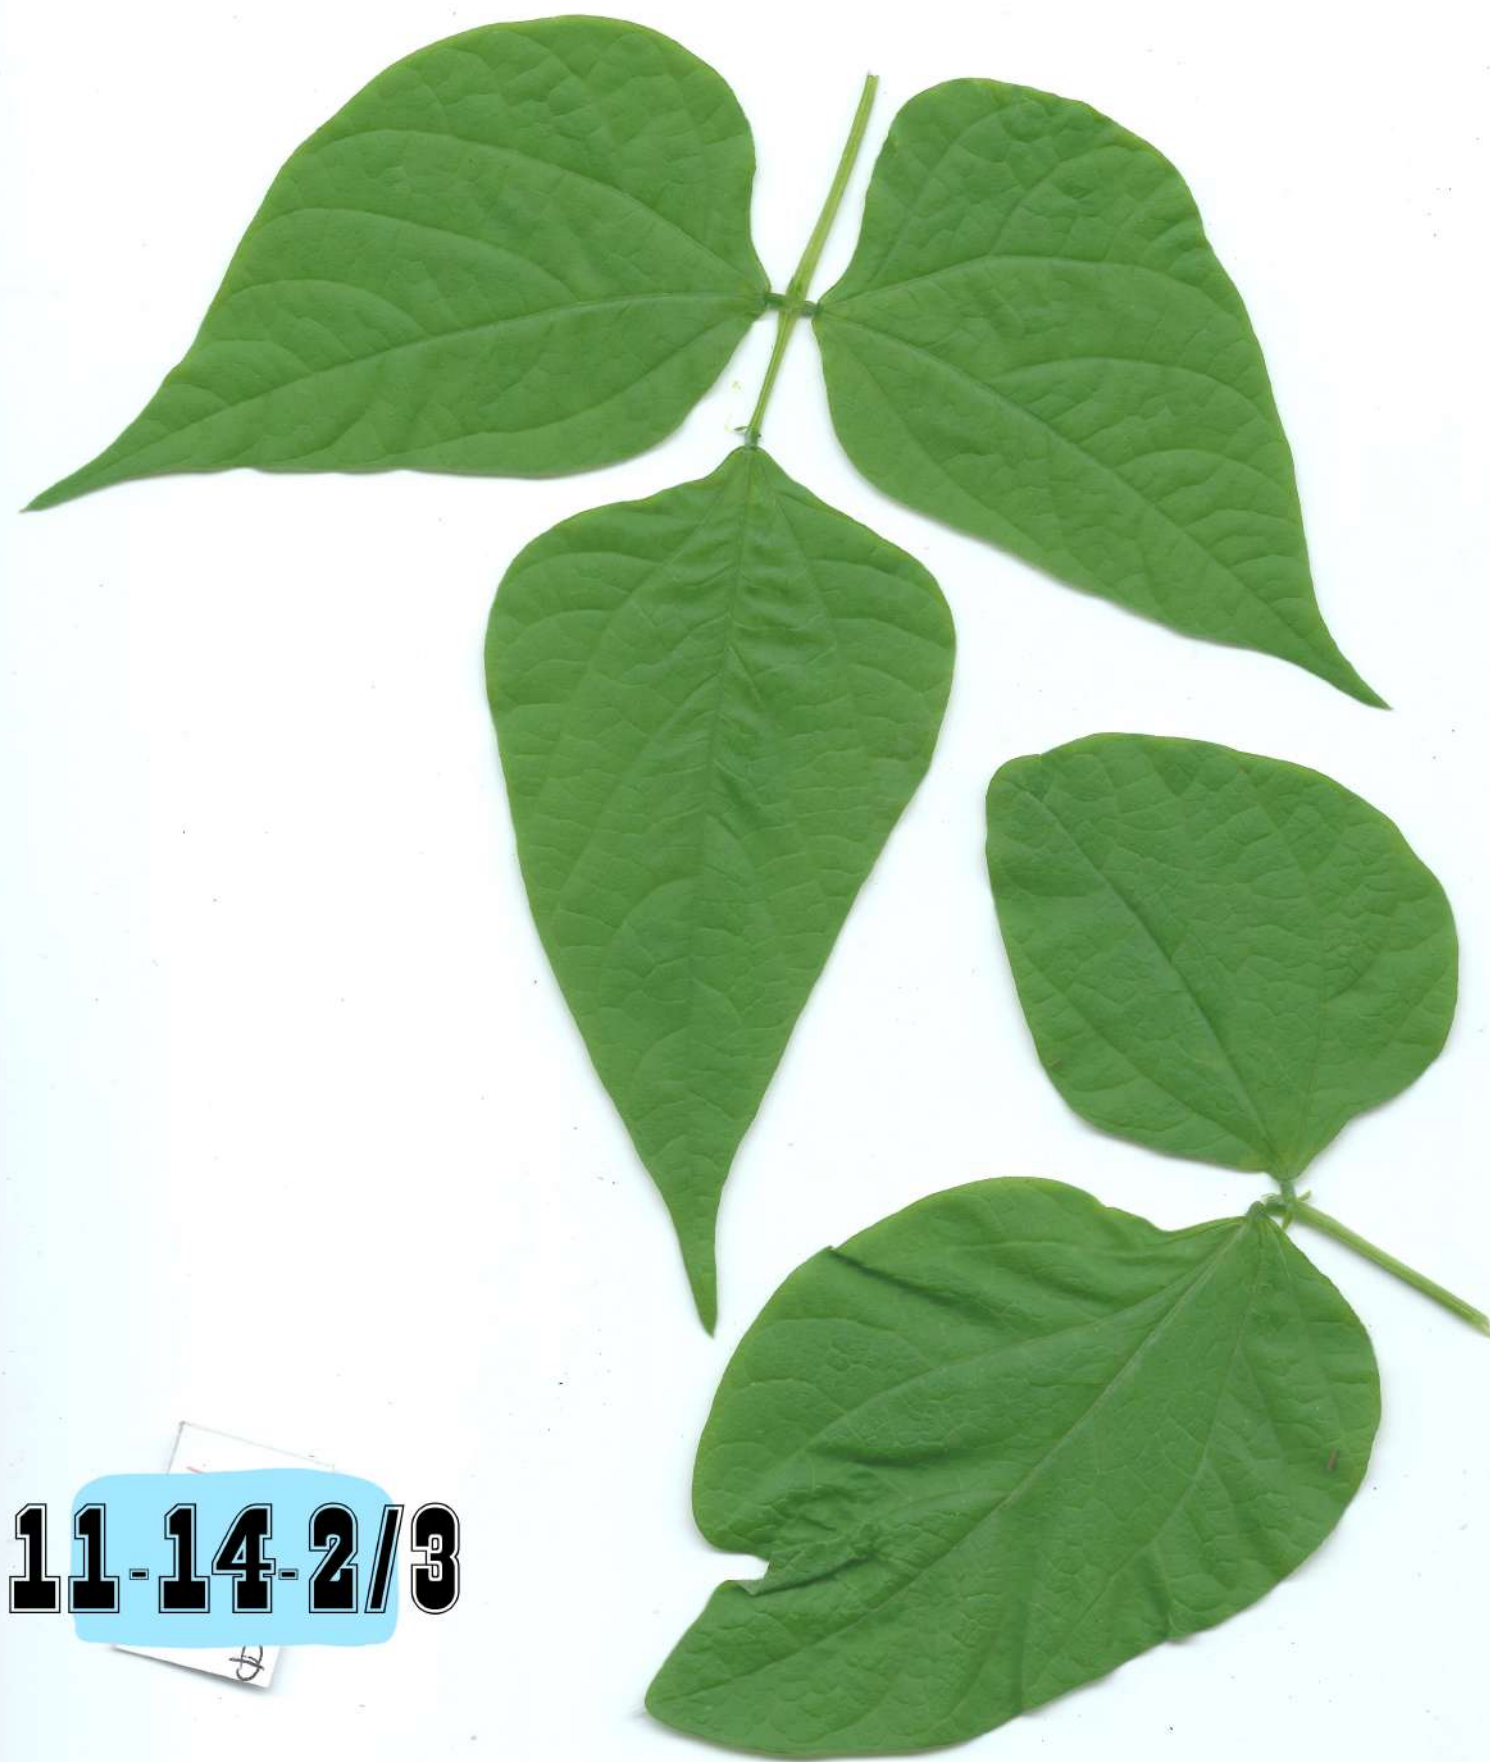

11-14-2/3

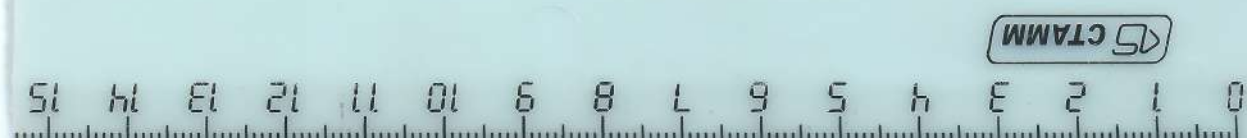

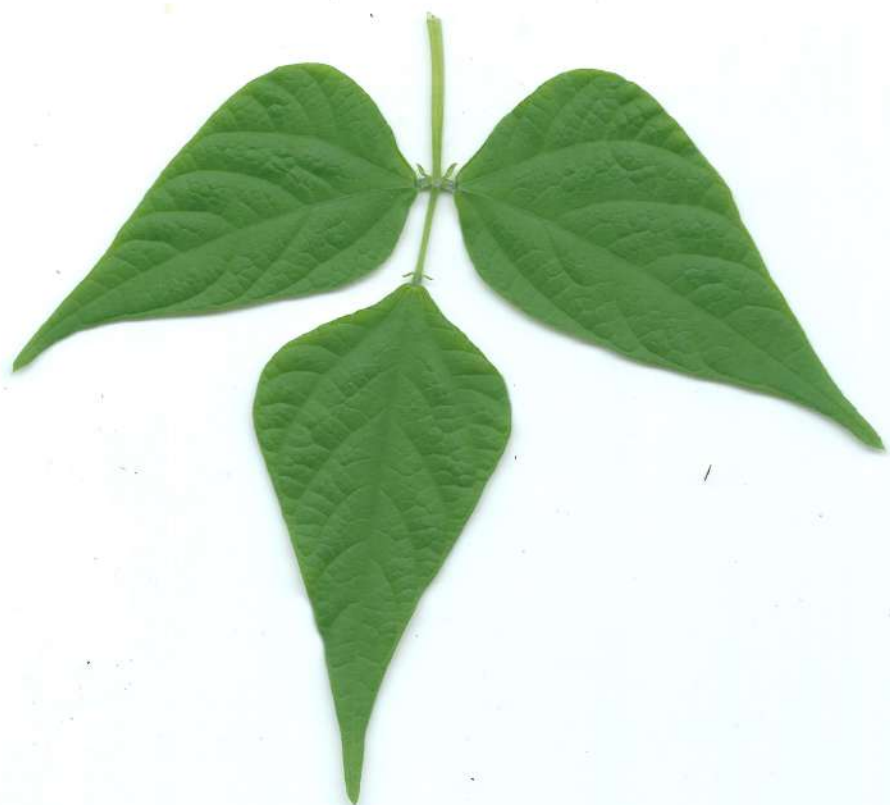

**11-14-1**

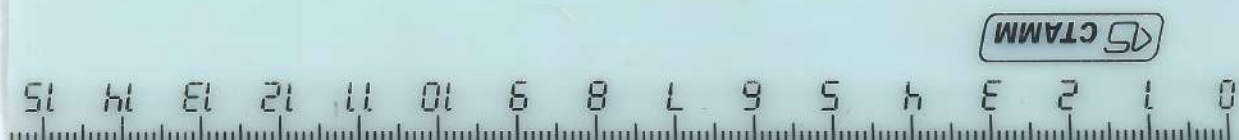

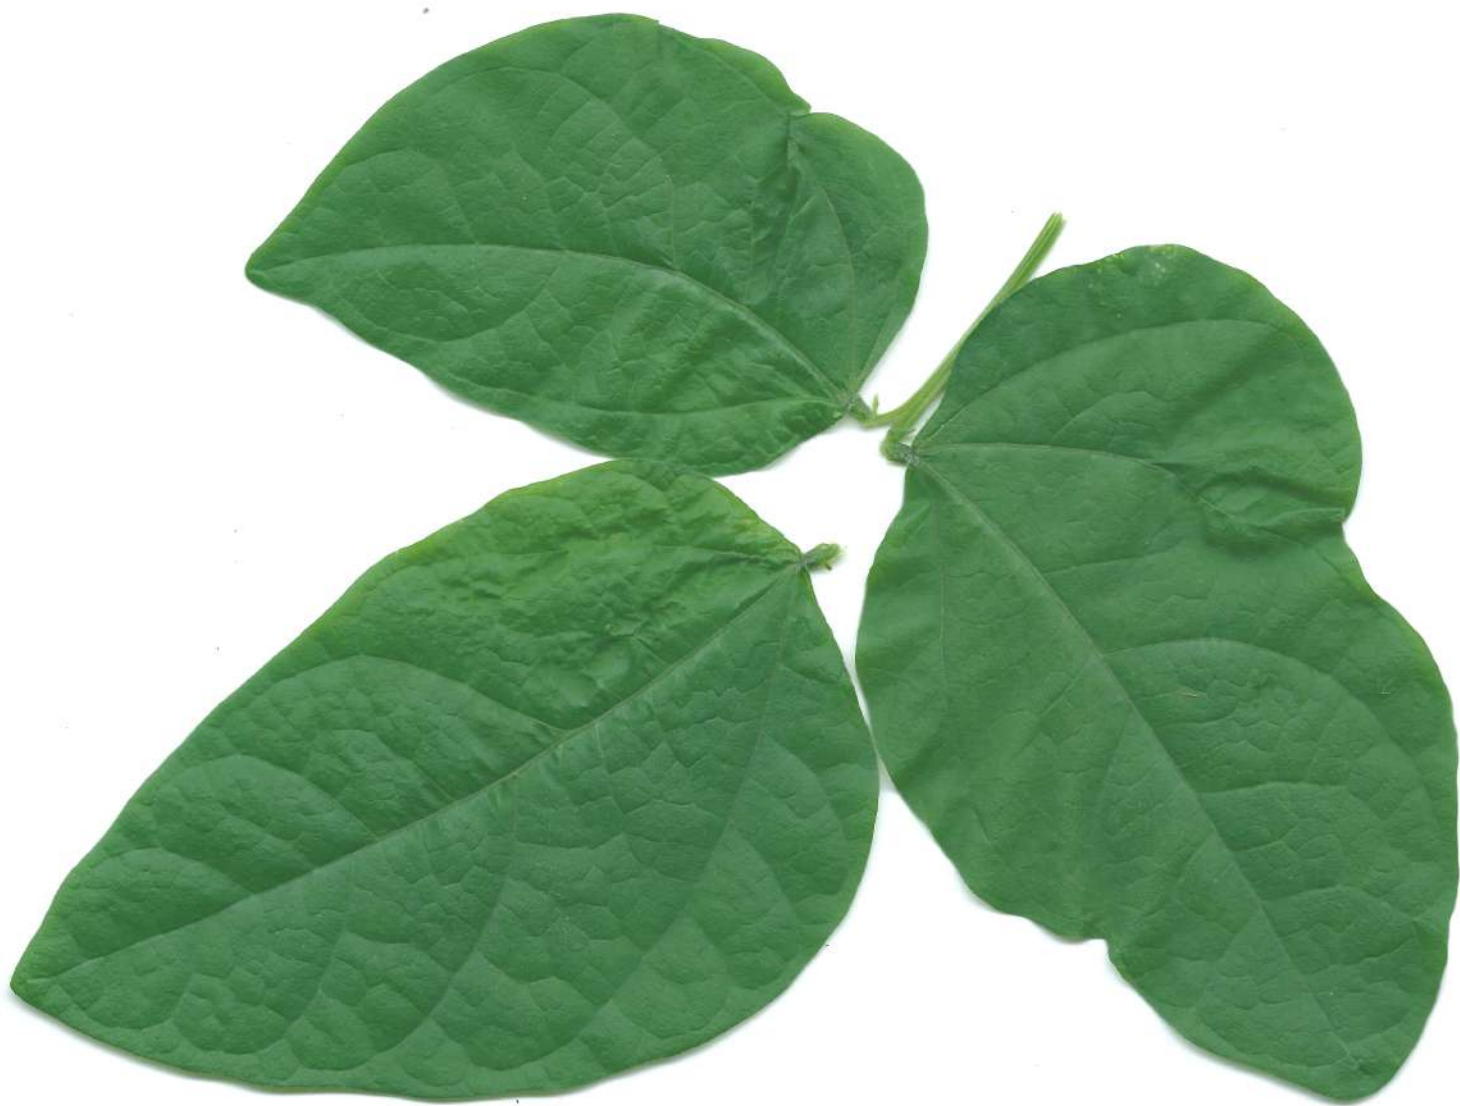

**11-15-1**

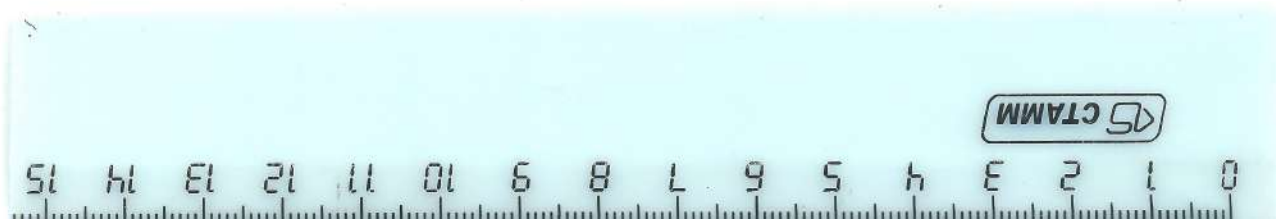



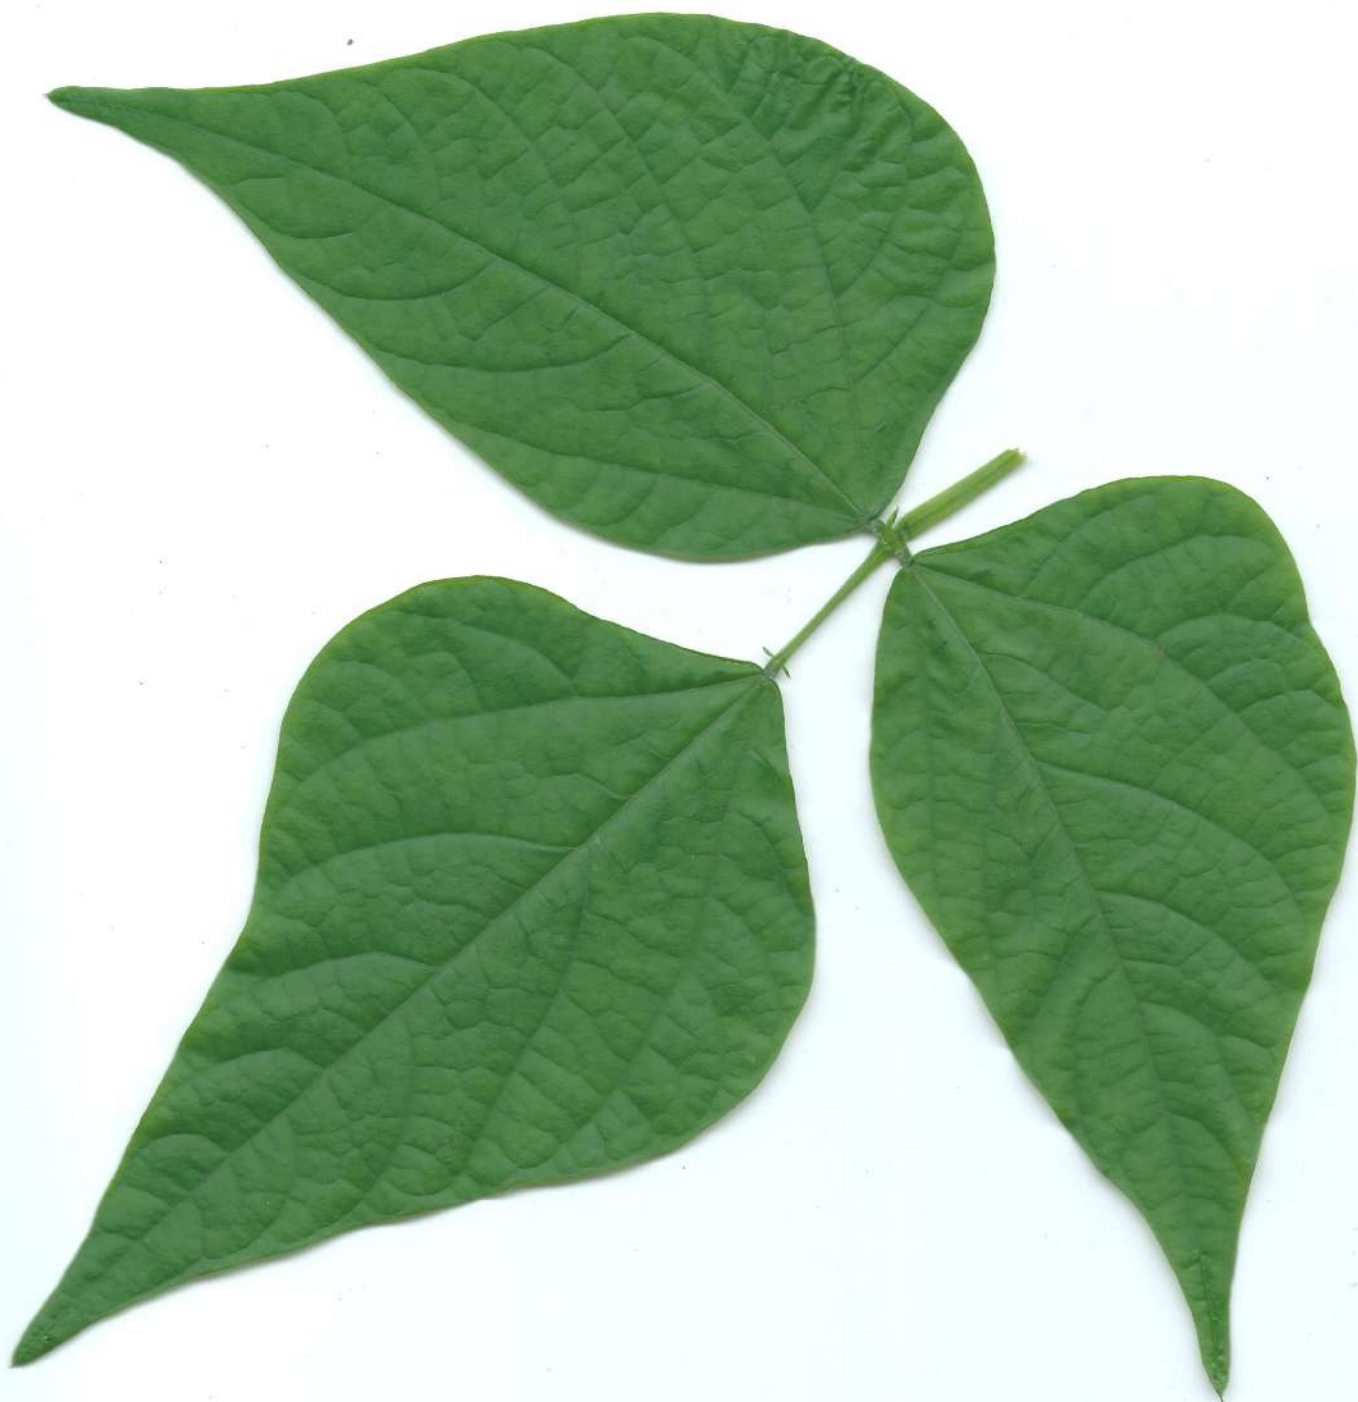

**11-15-2**

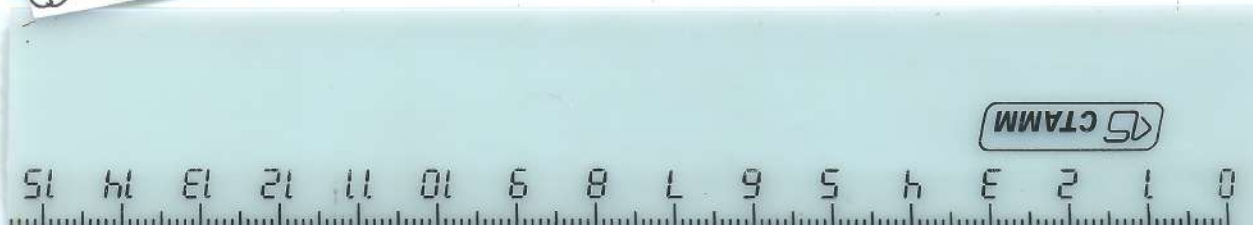



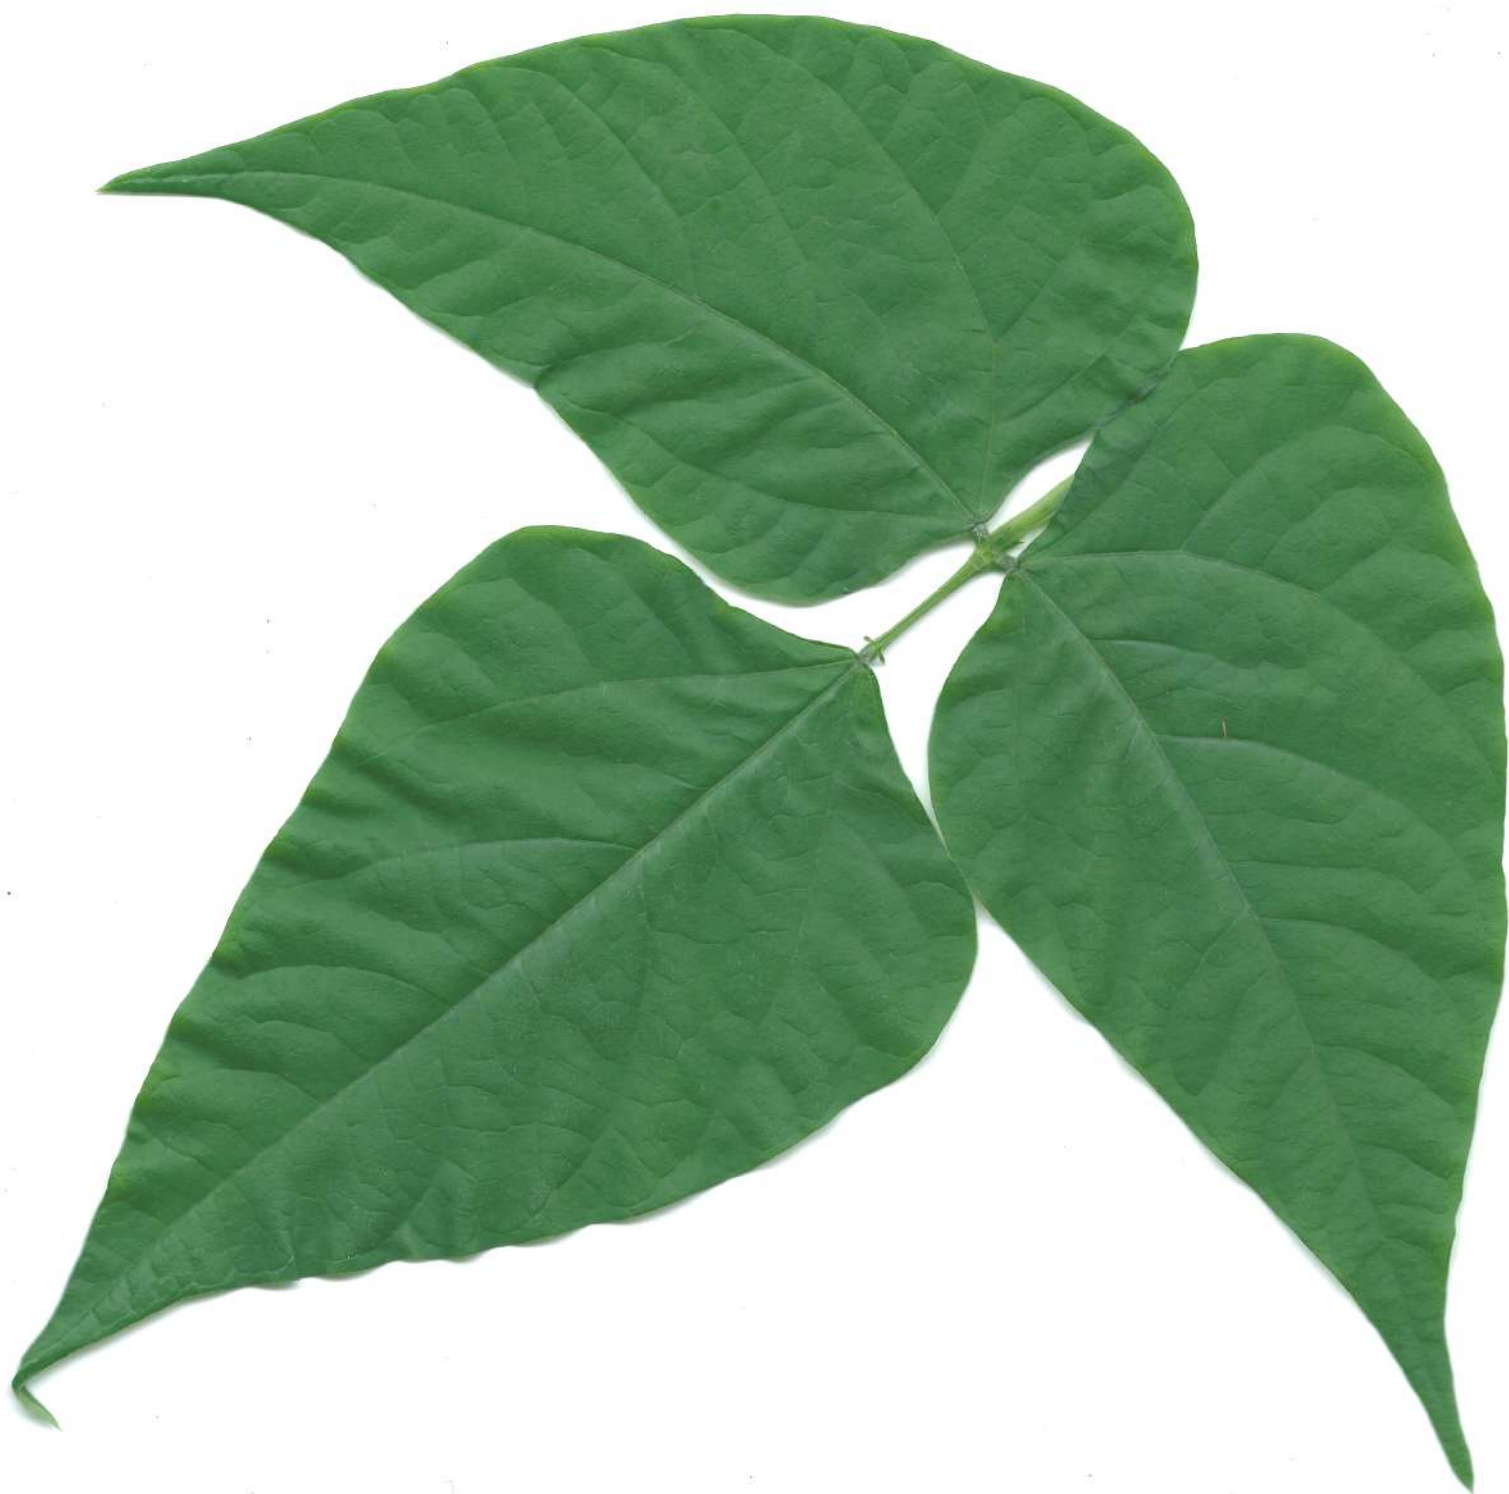

**11-15-3**

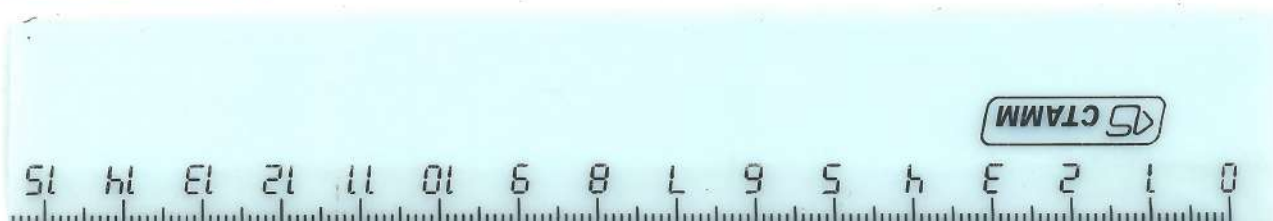

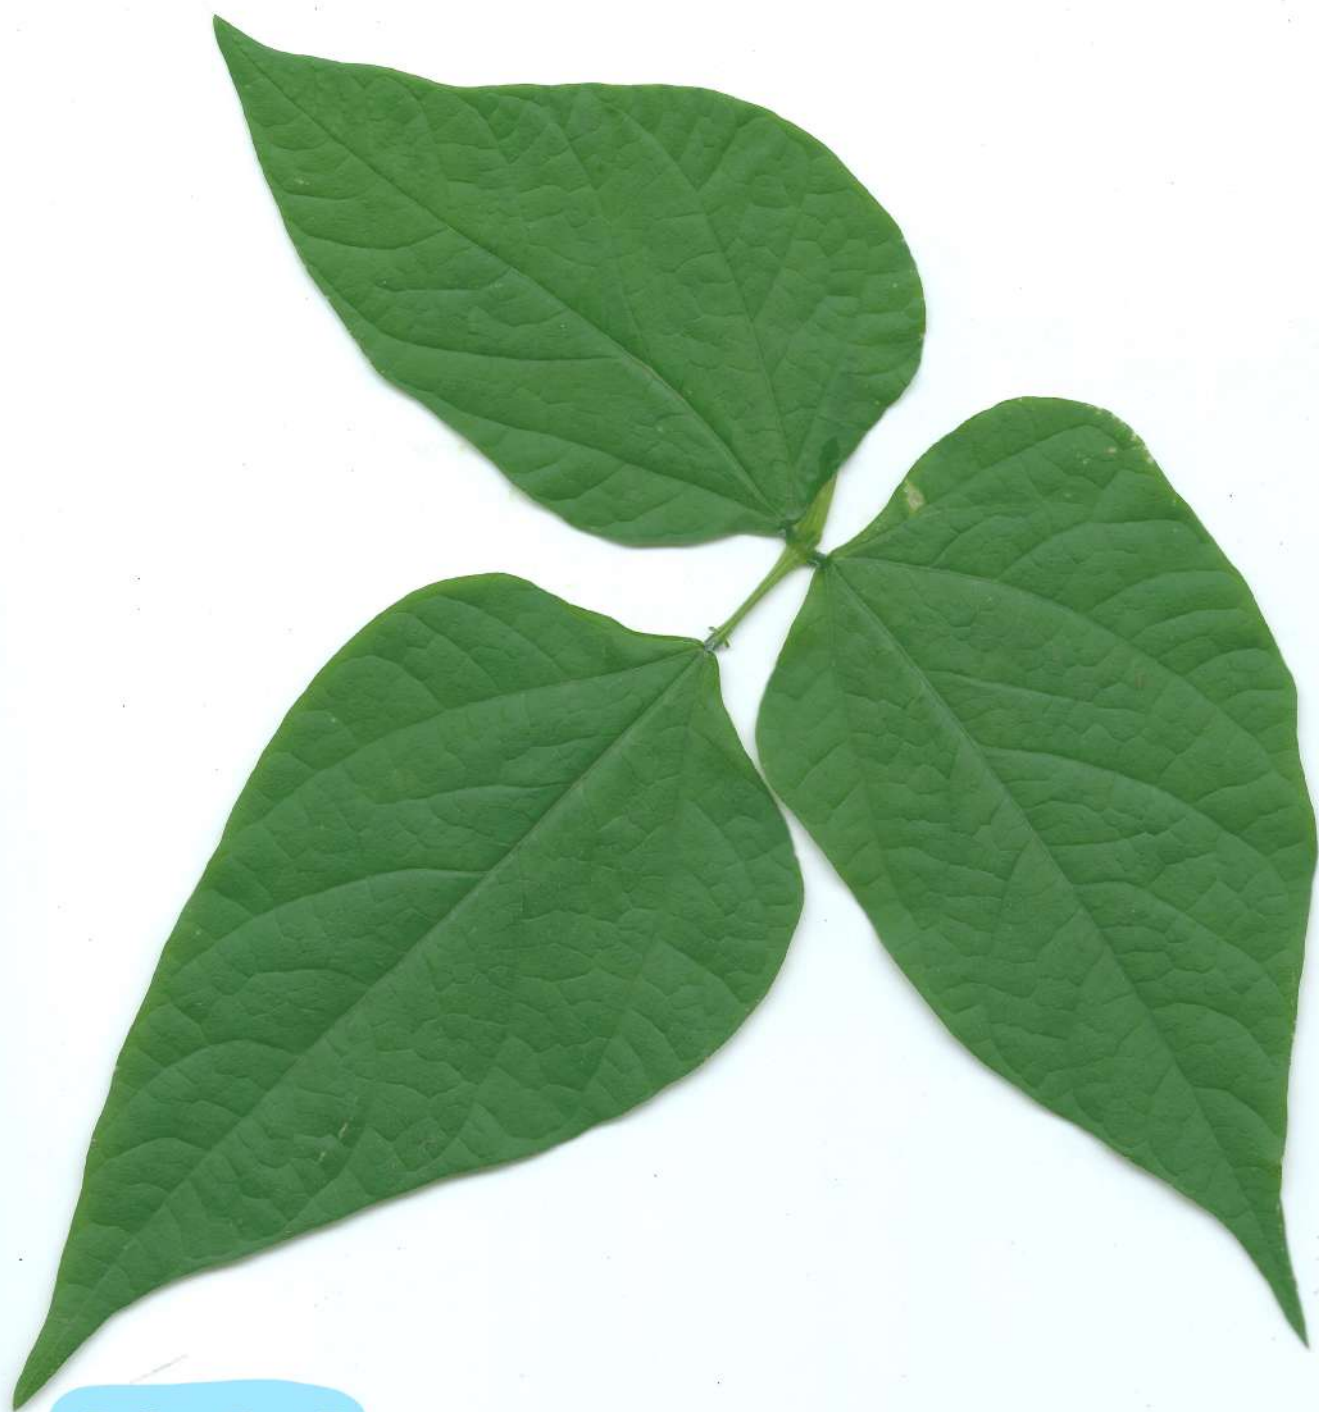

12-1-1

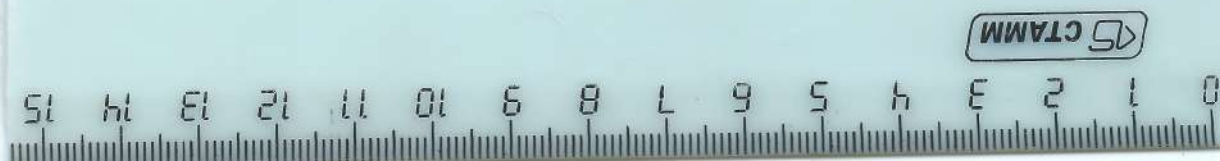

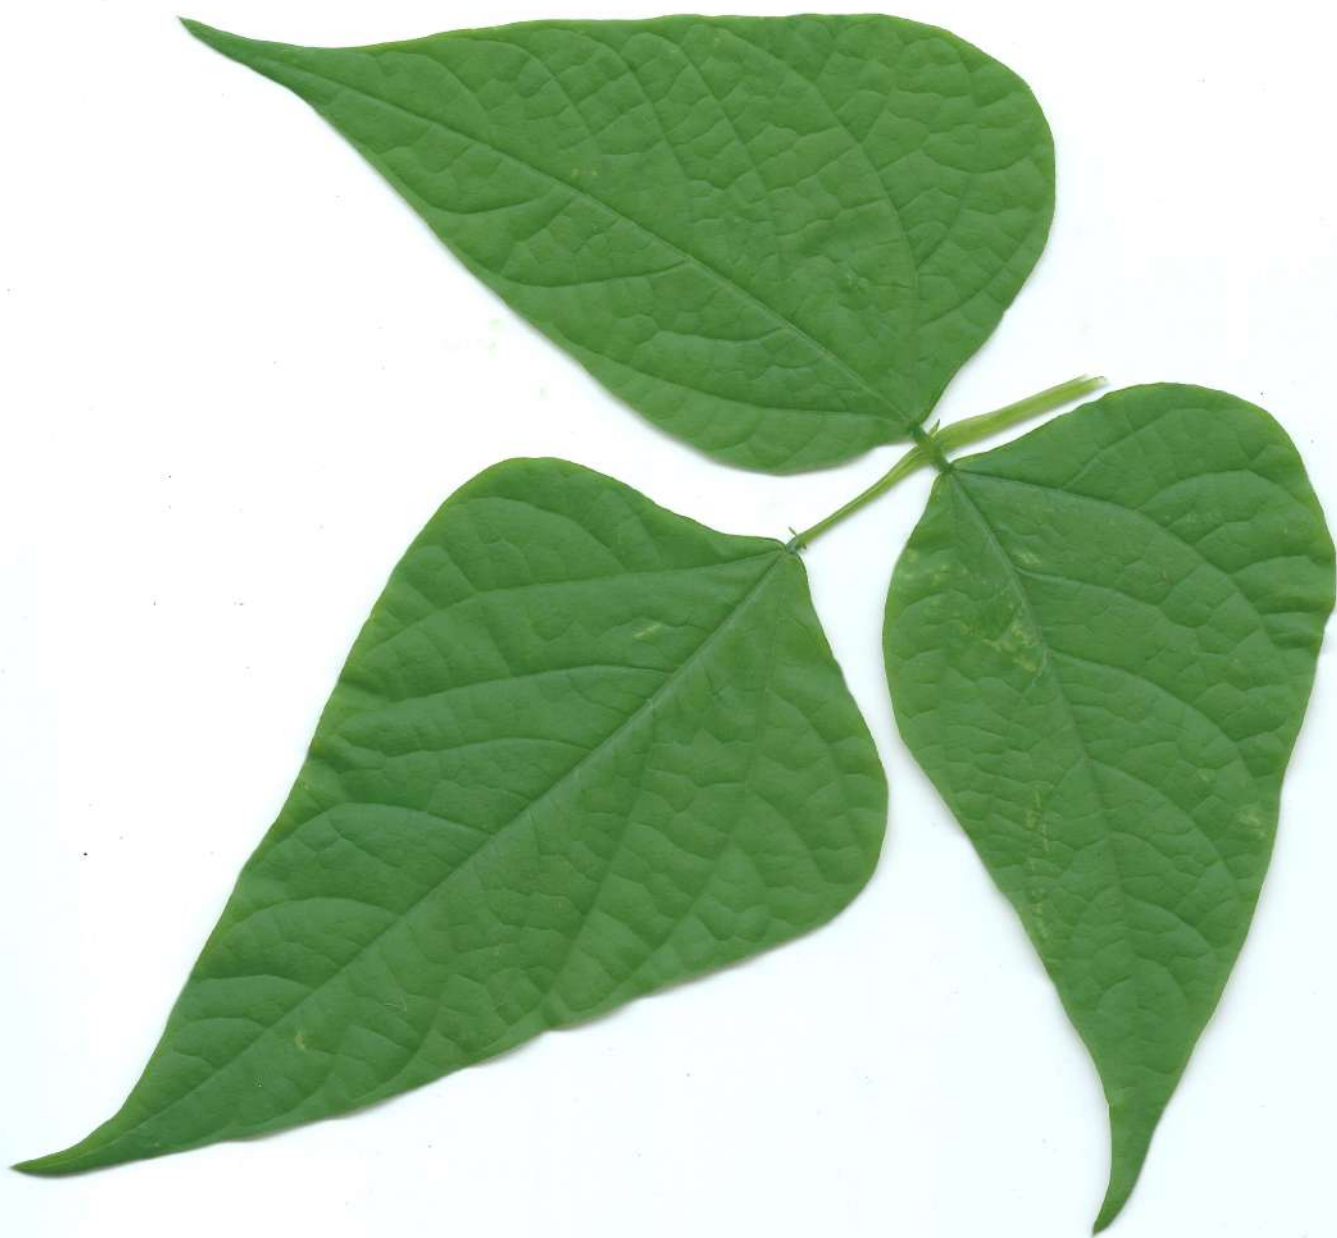

12-1-2

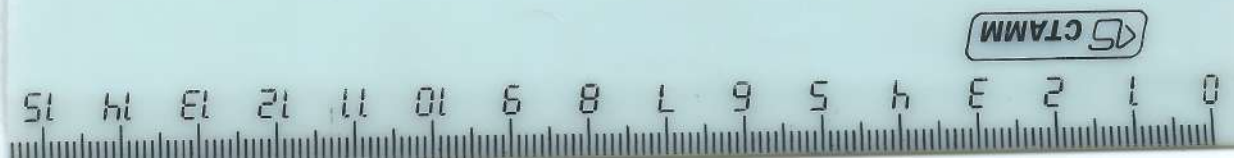



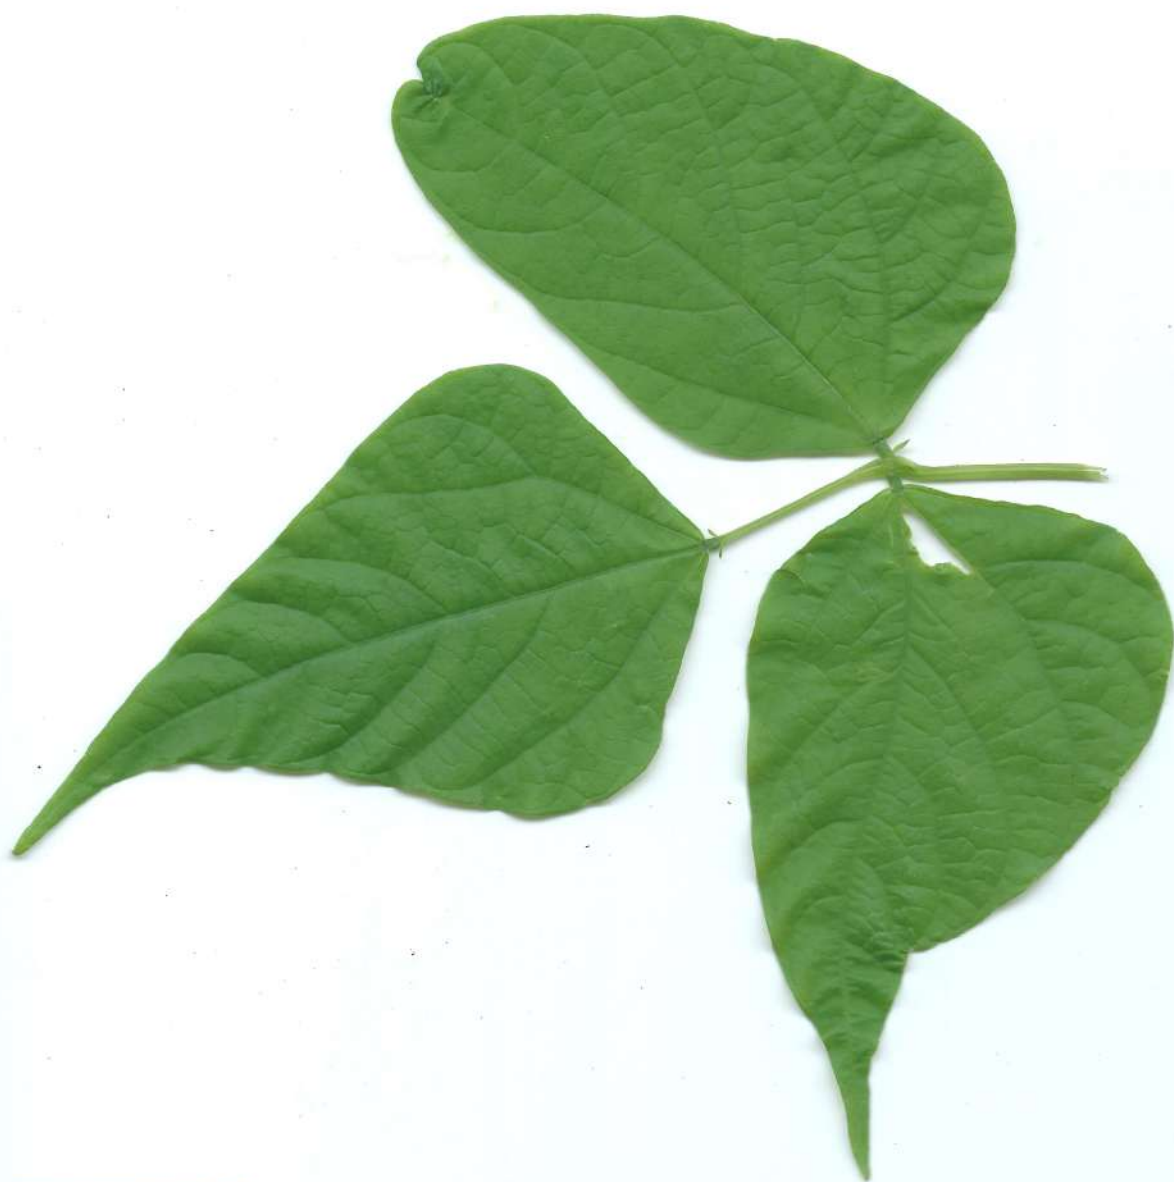

**12-1-3**

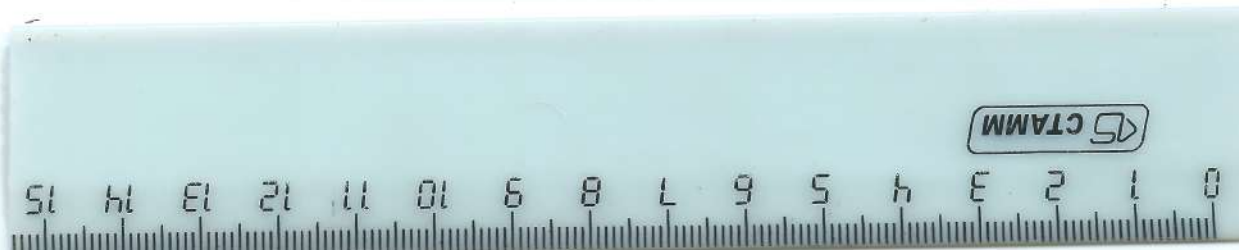



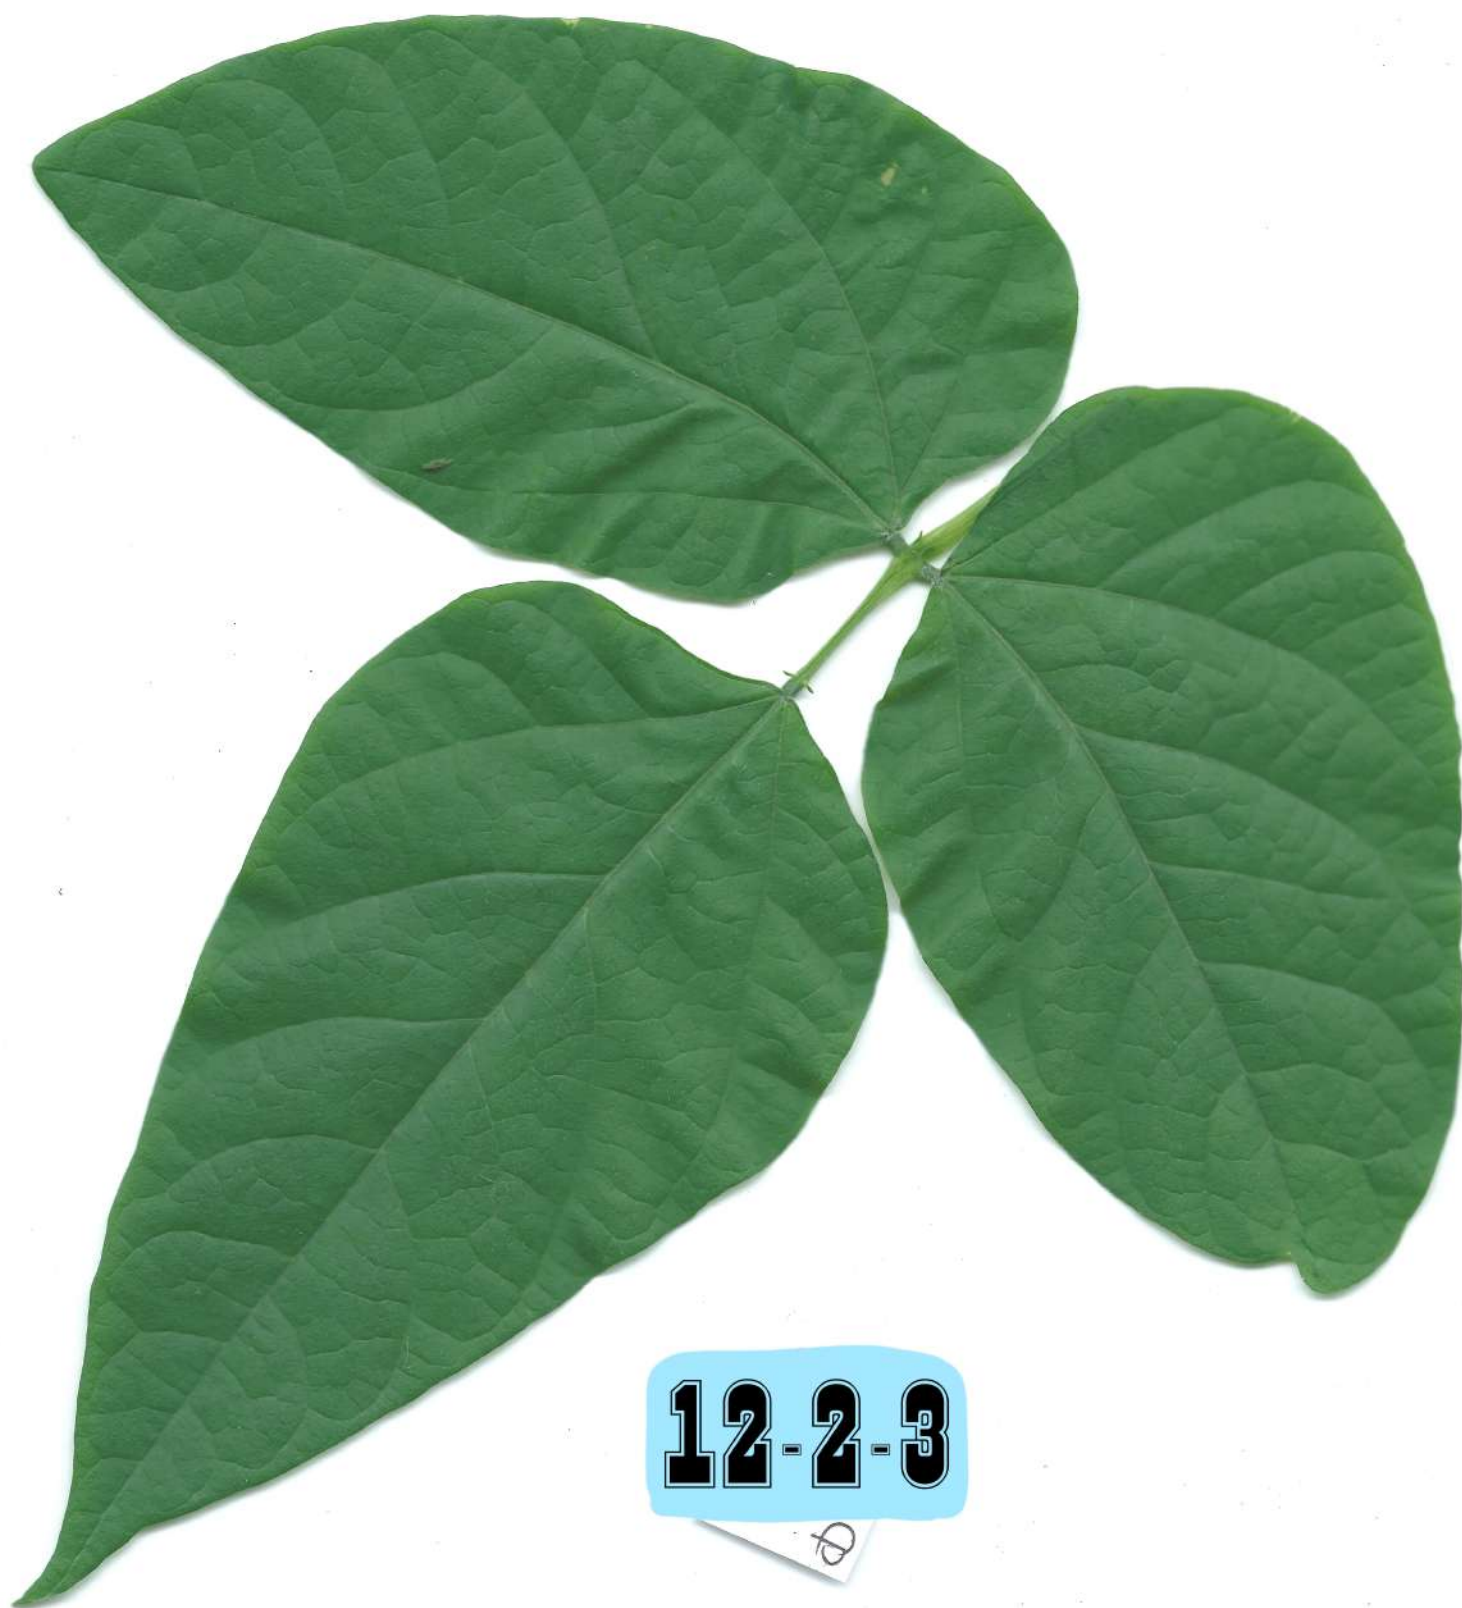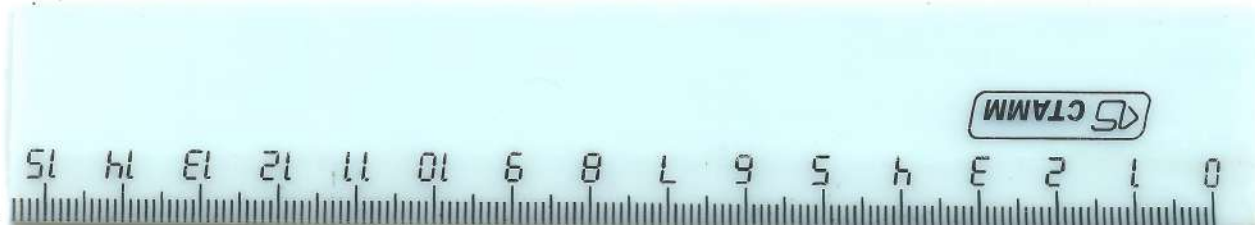

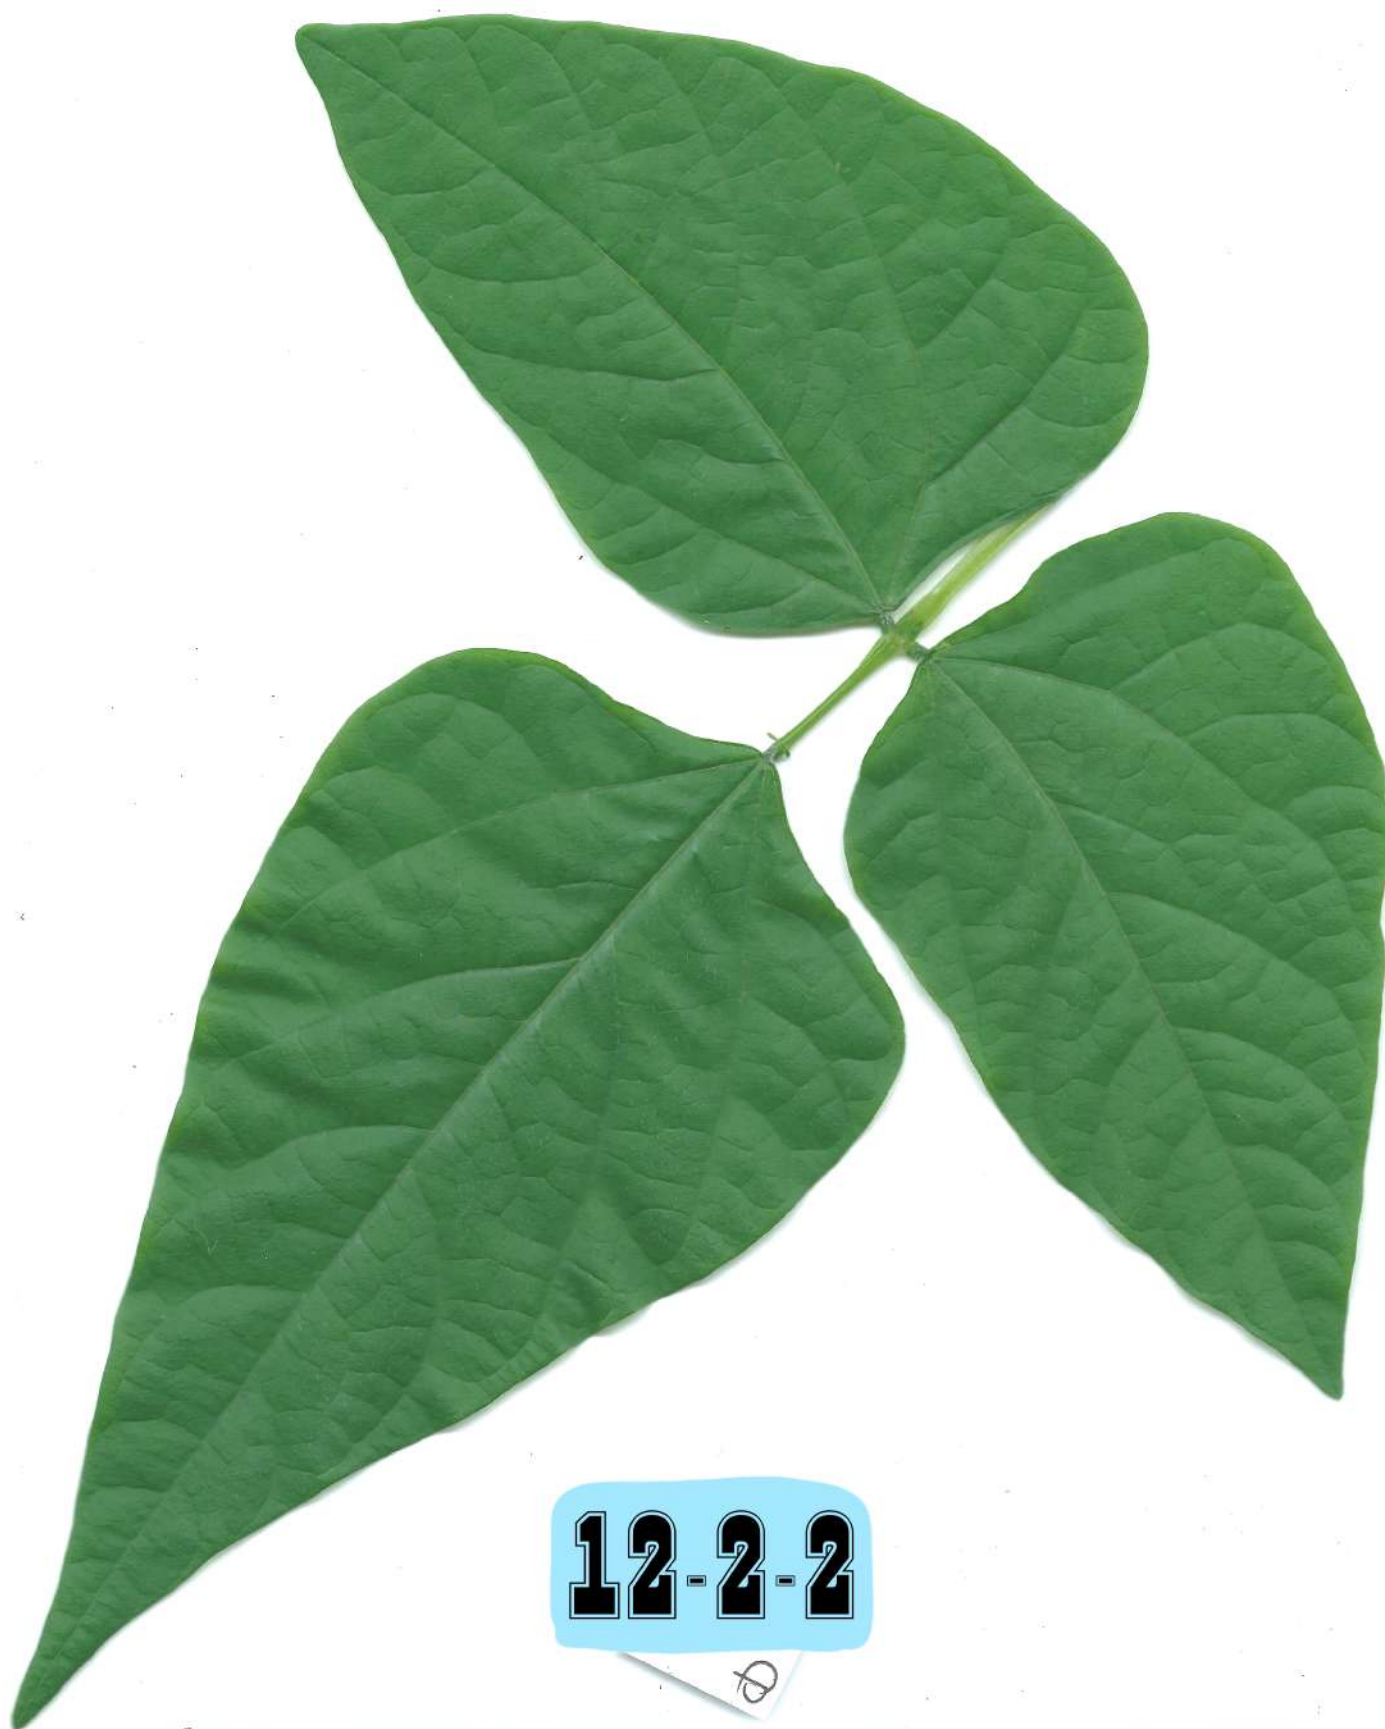

12-2-2

D

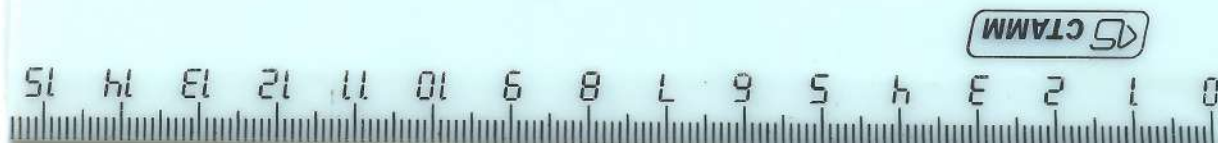

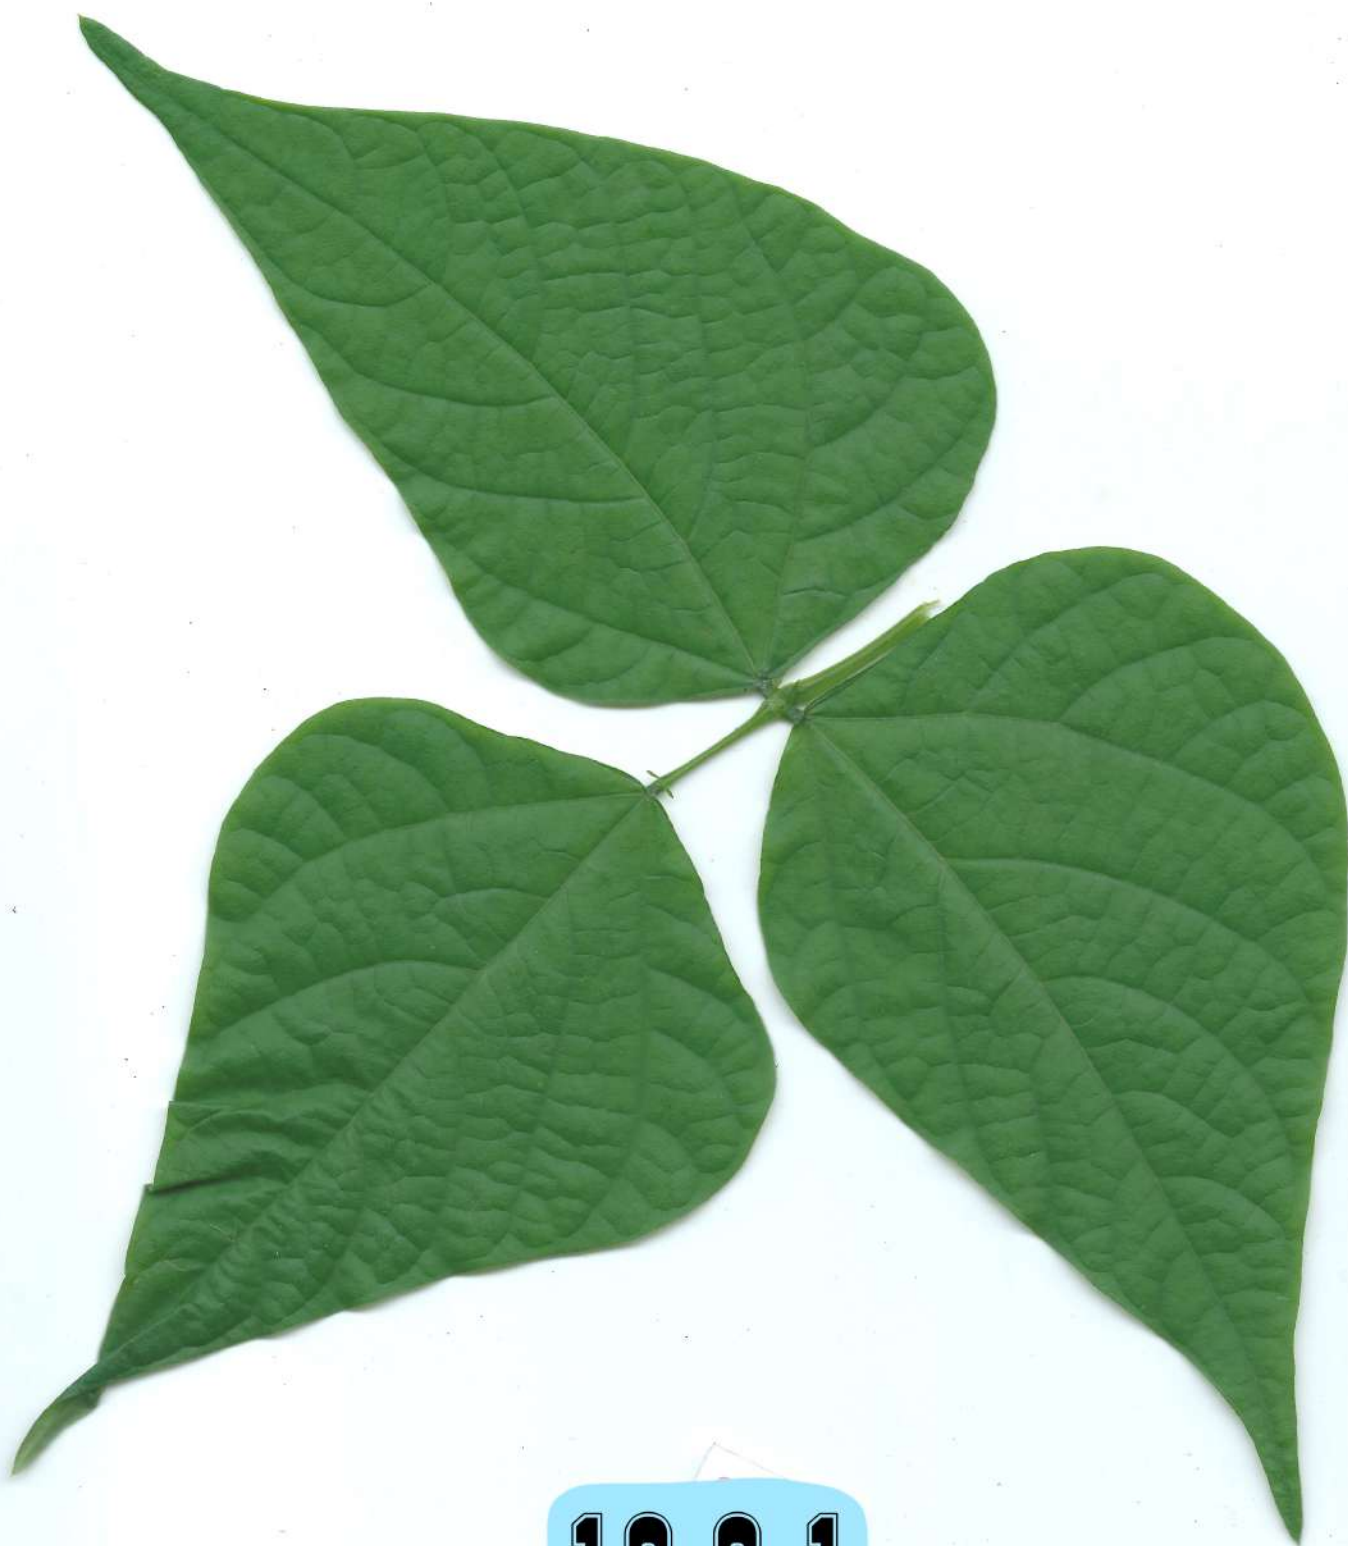

12-2-1

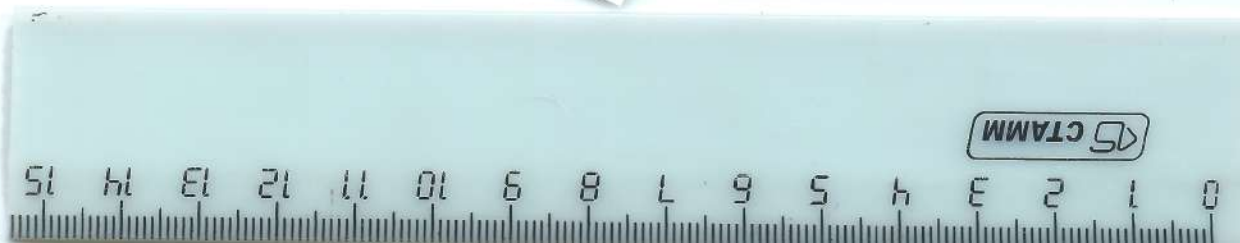



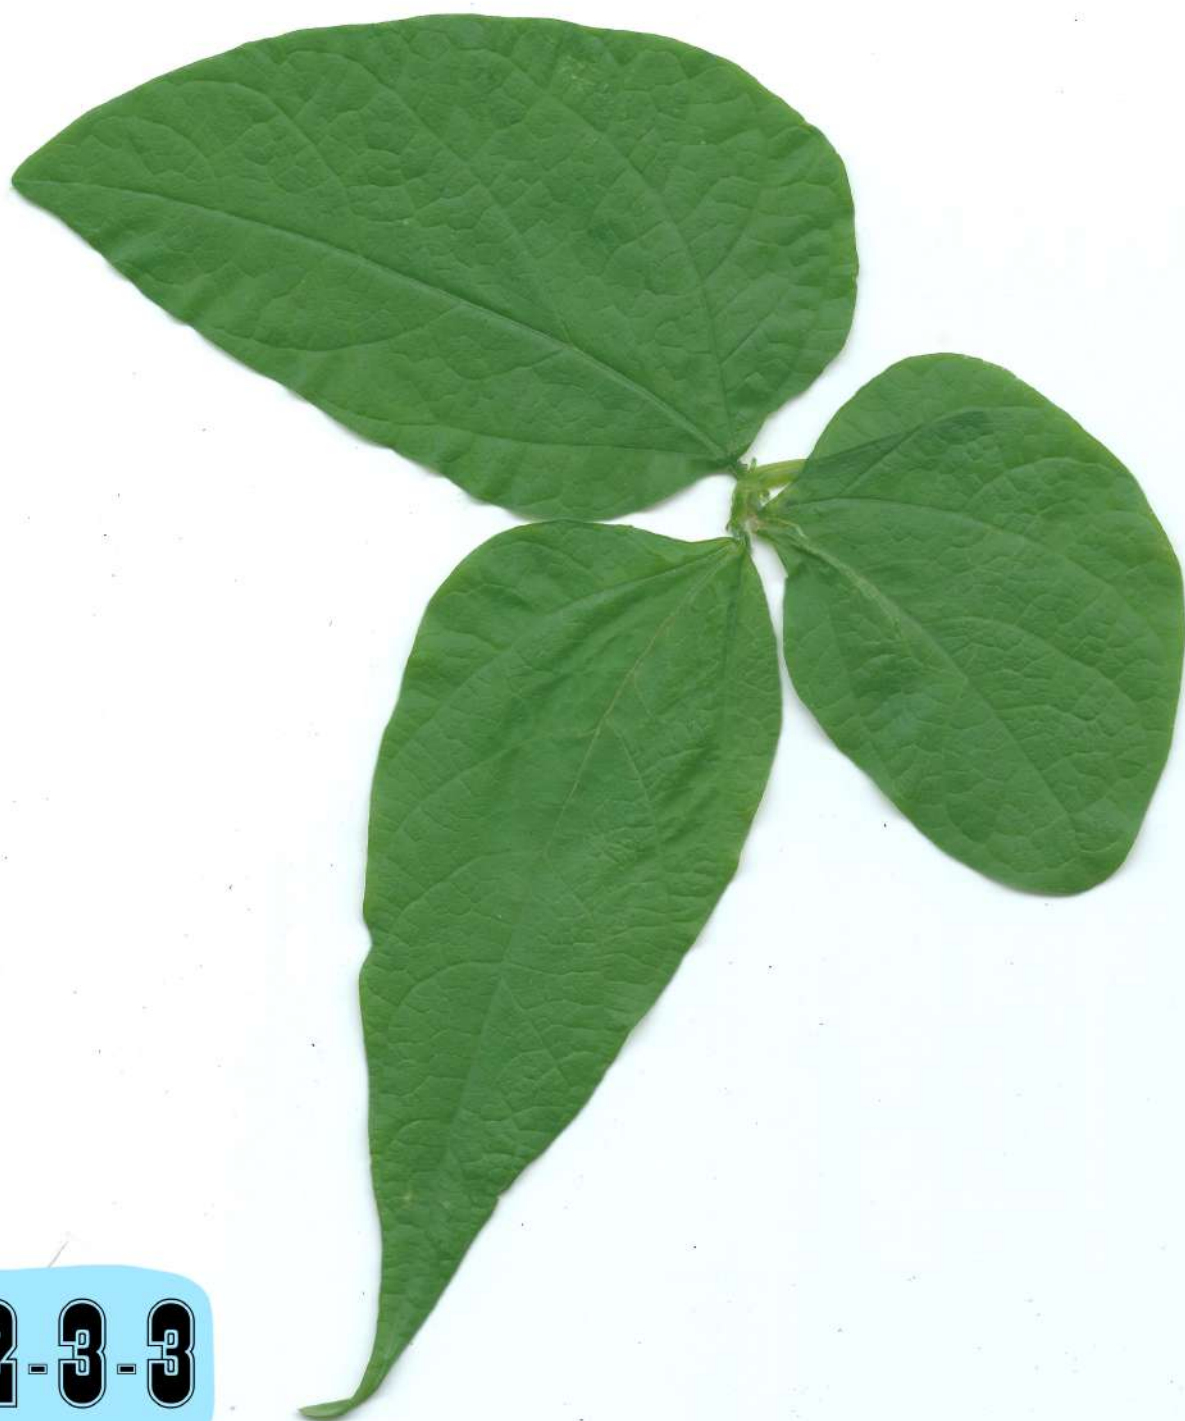

12-3-3

0

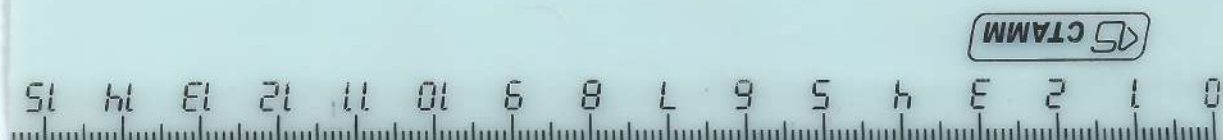



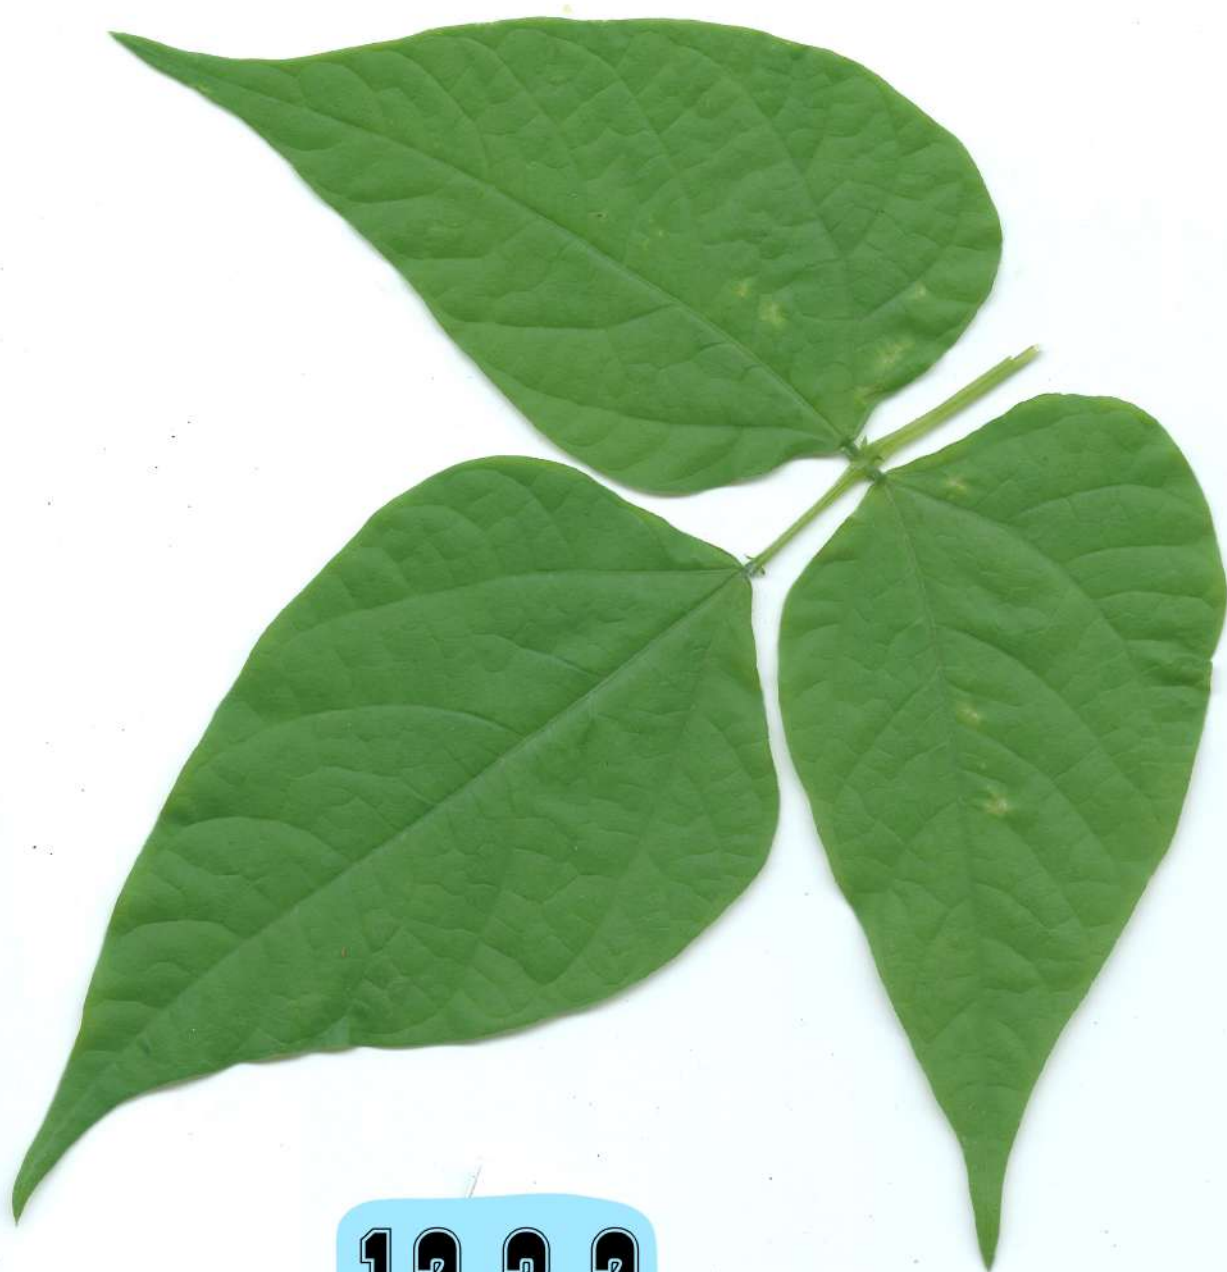

**12-3-2**

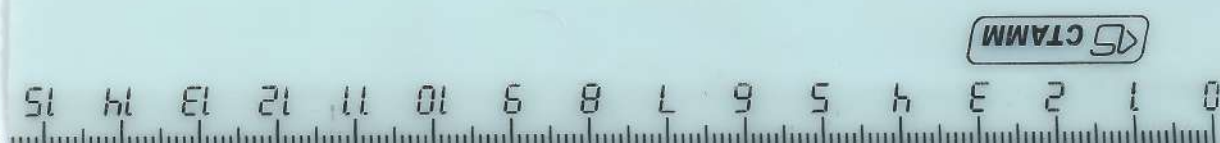

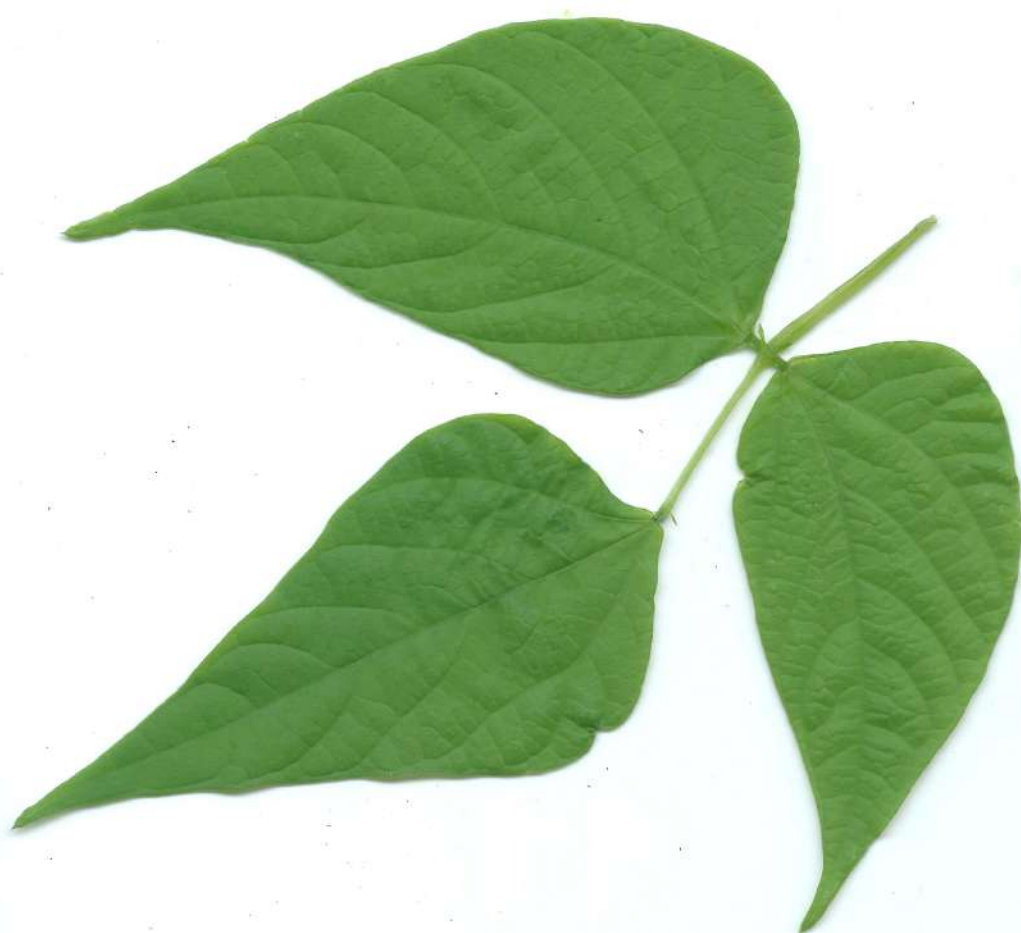

**12-3-1**

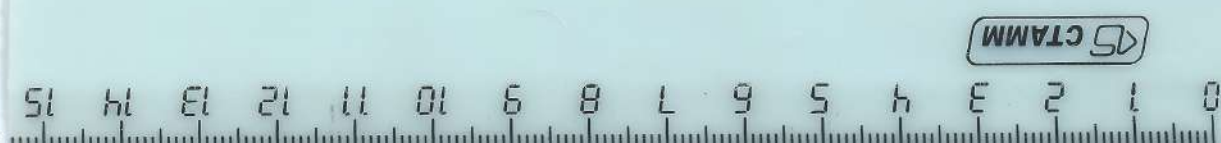

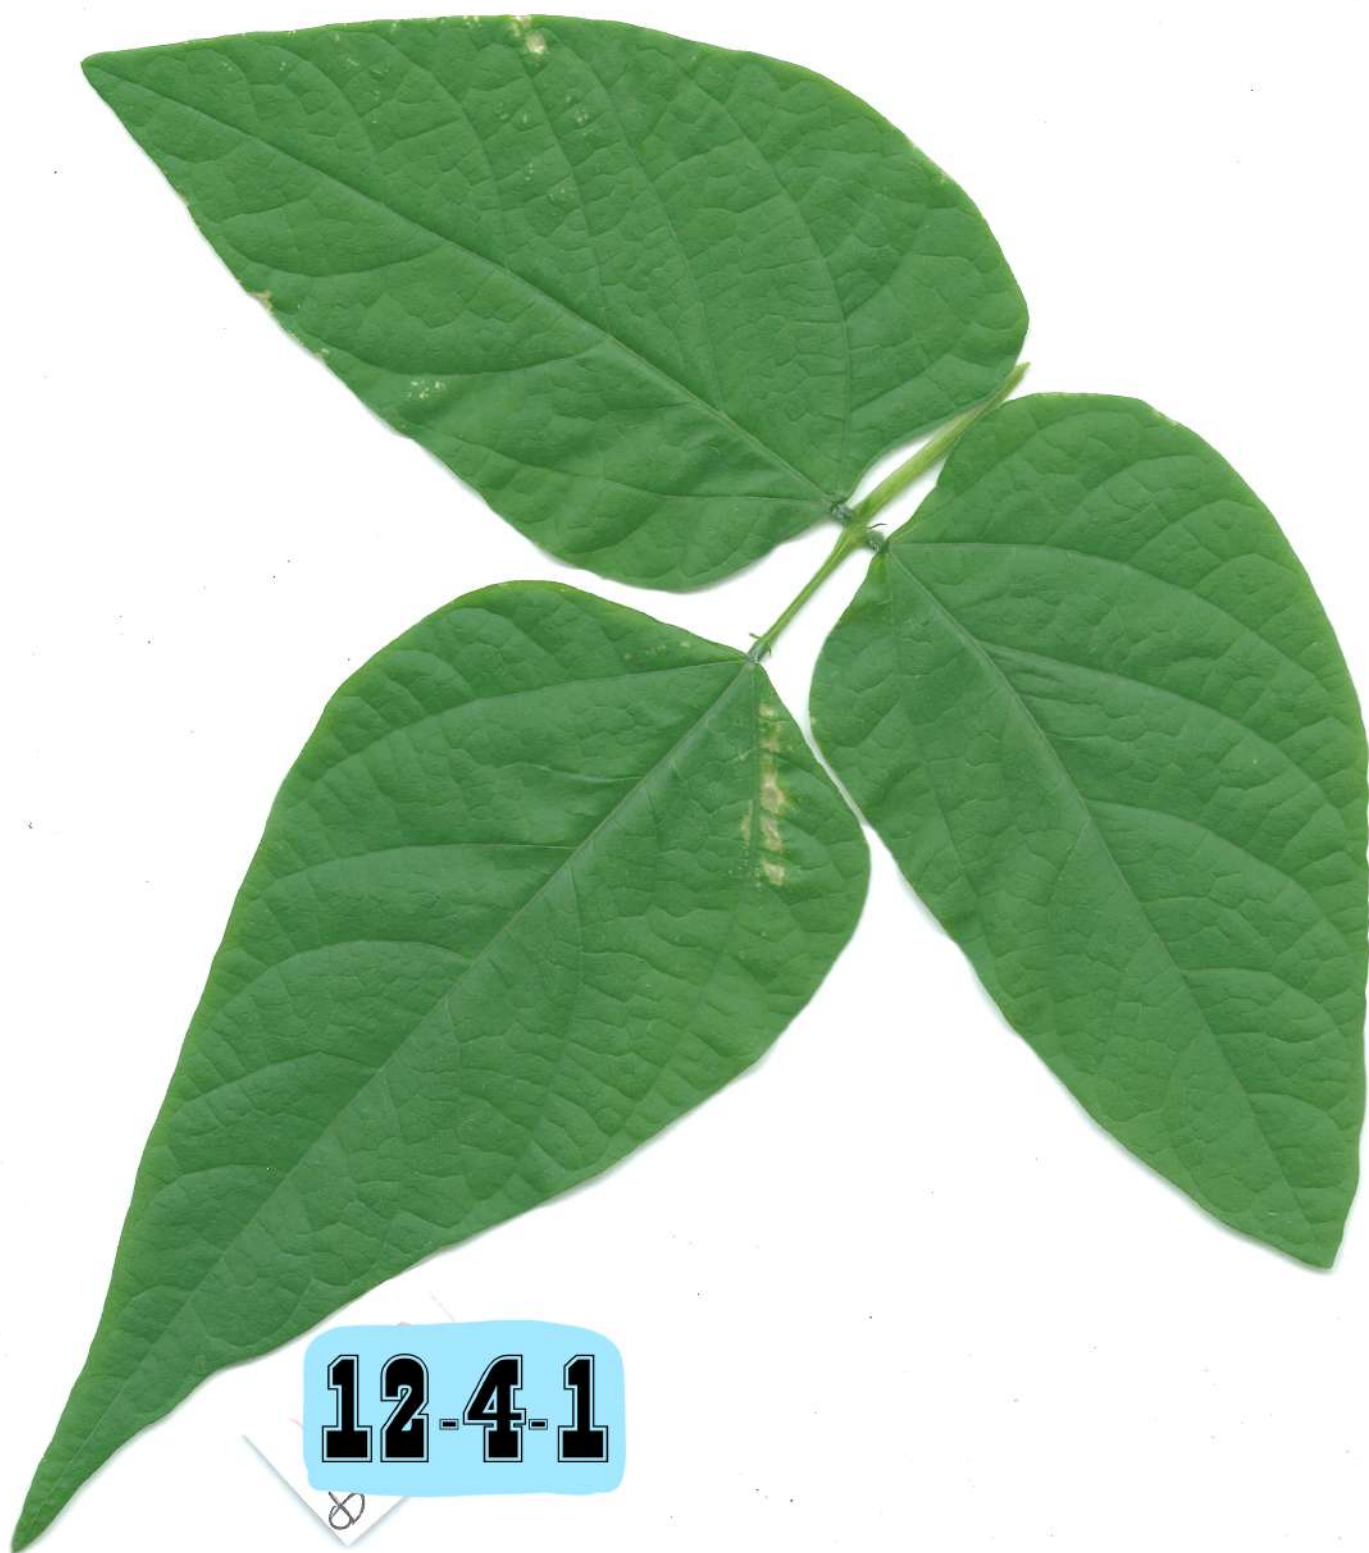

12-4-1

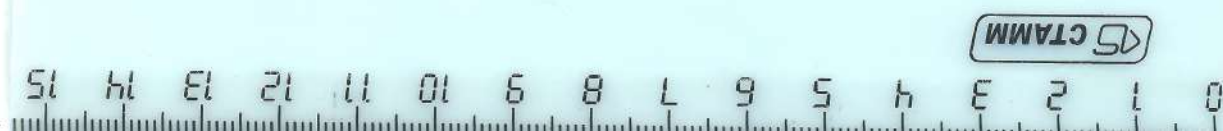

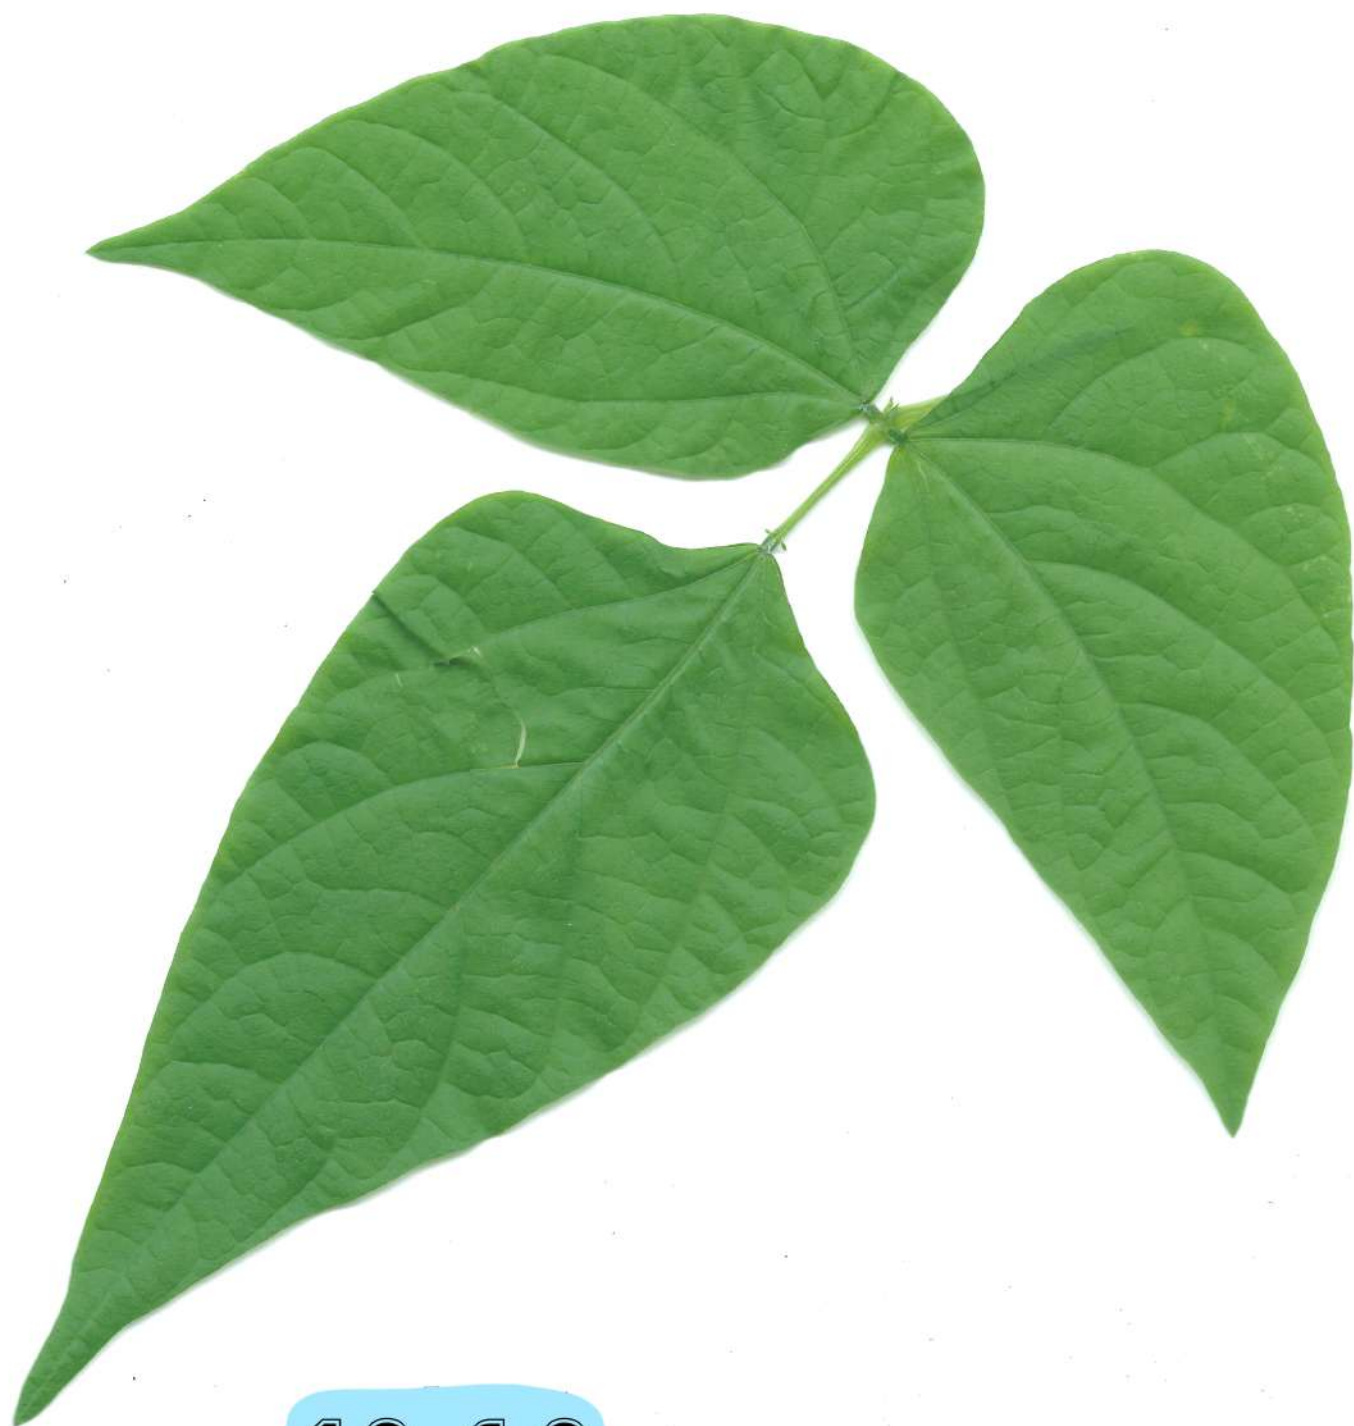

**12-4-2**

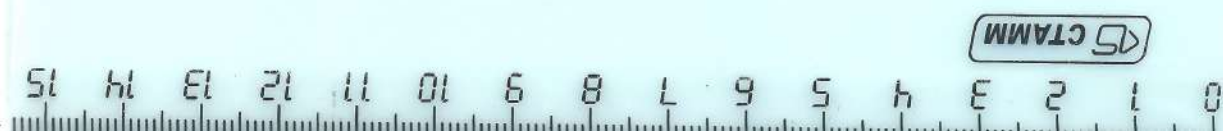



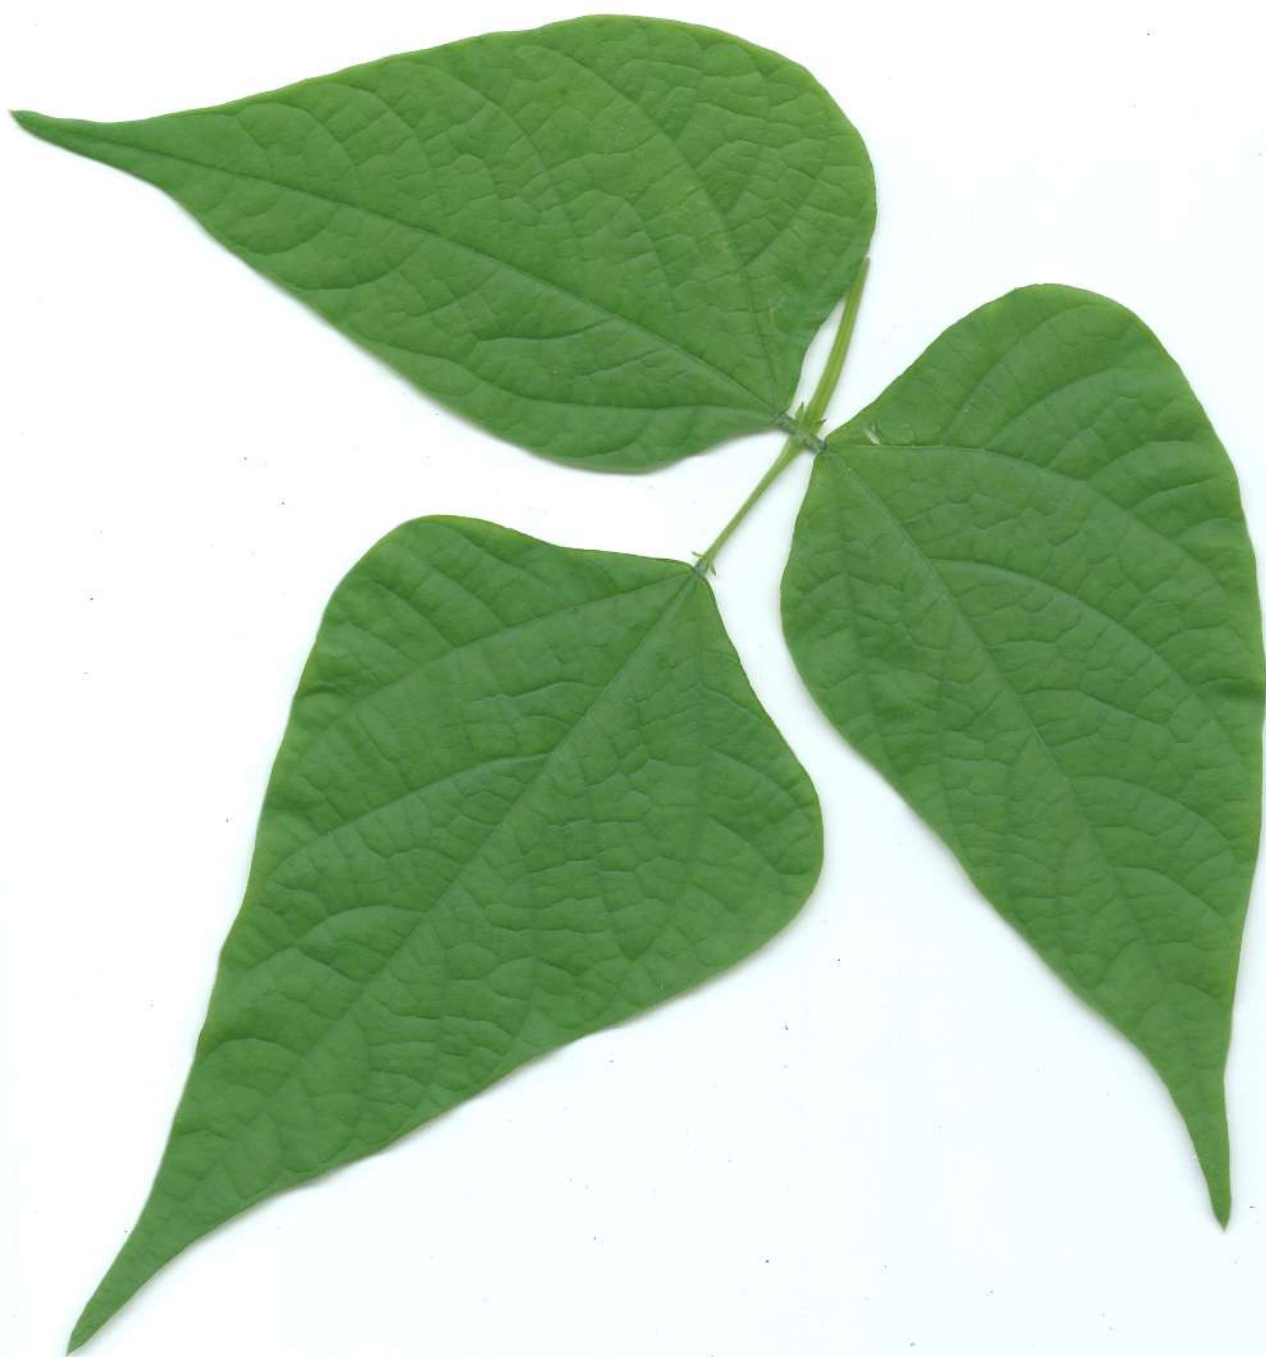

**12-4-3**

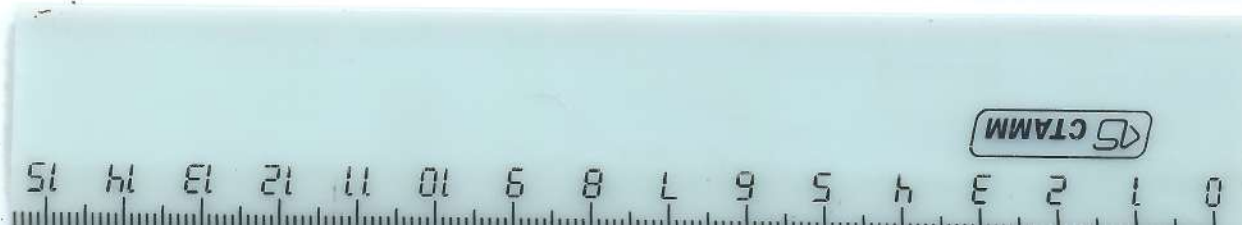

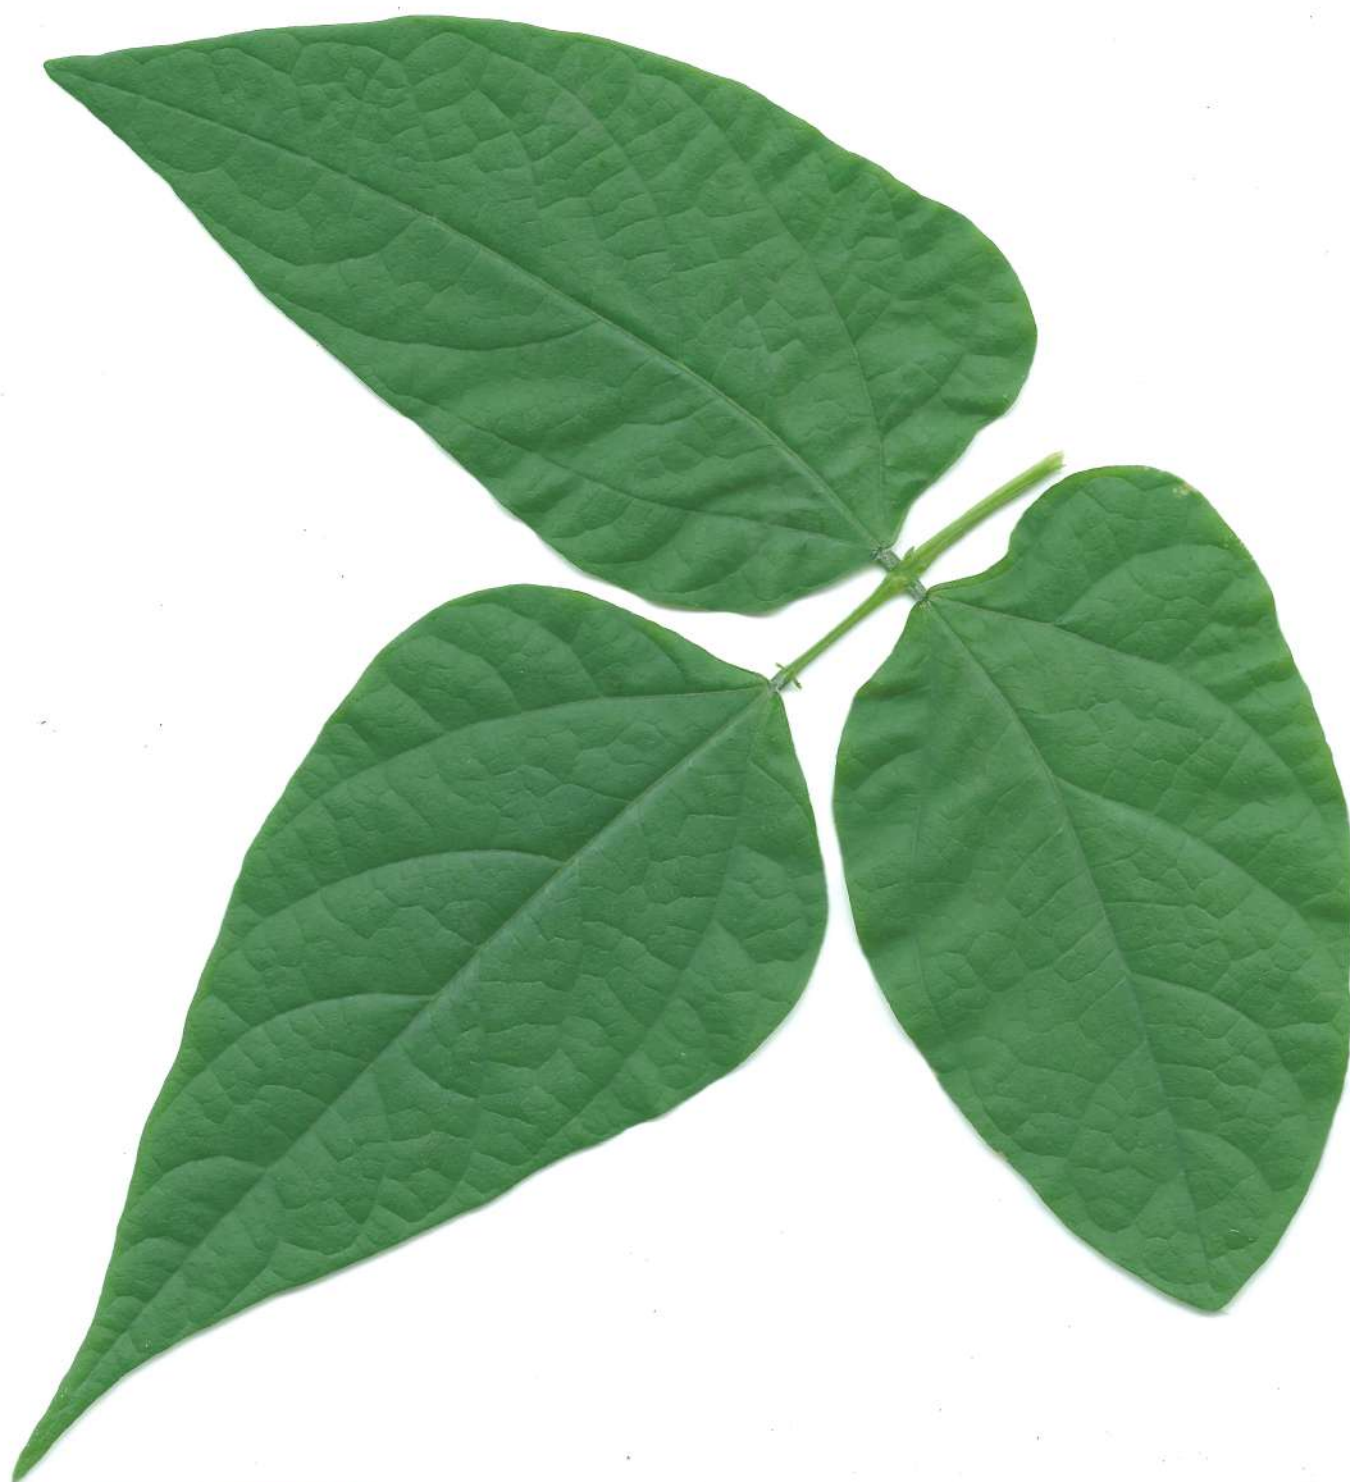

12-5-3

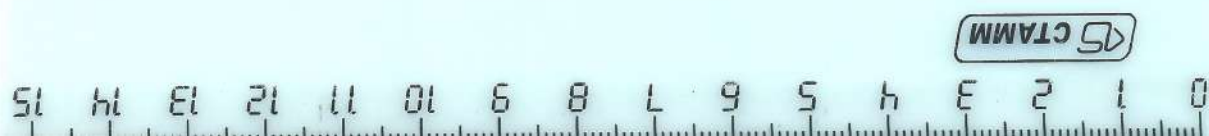

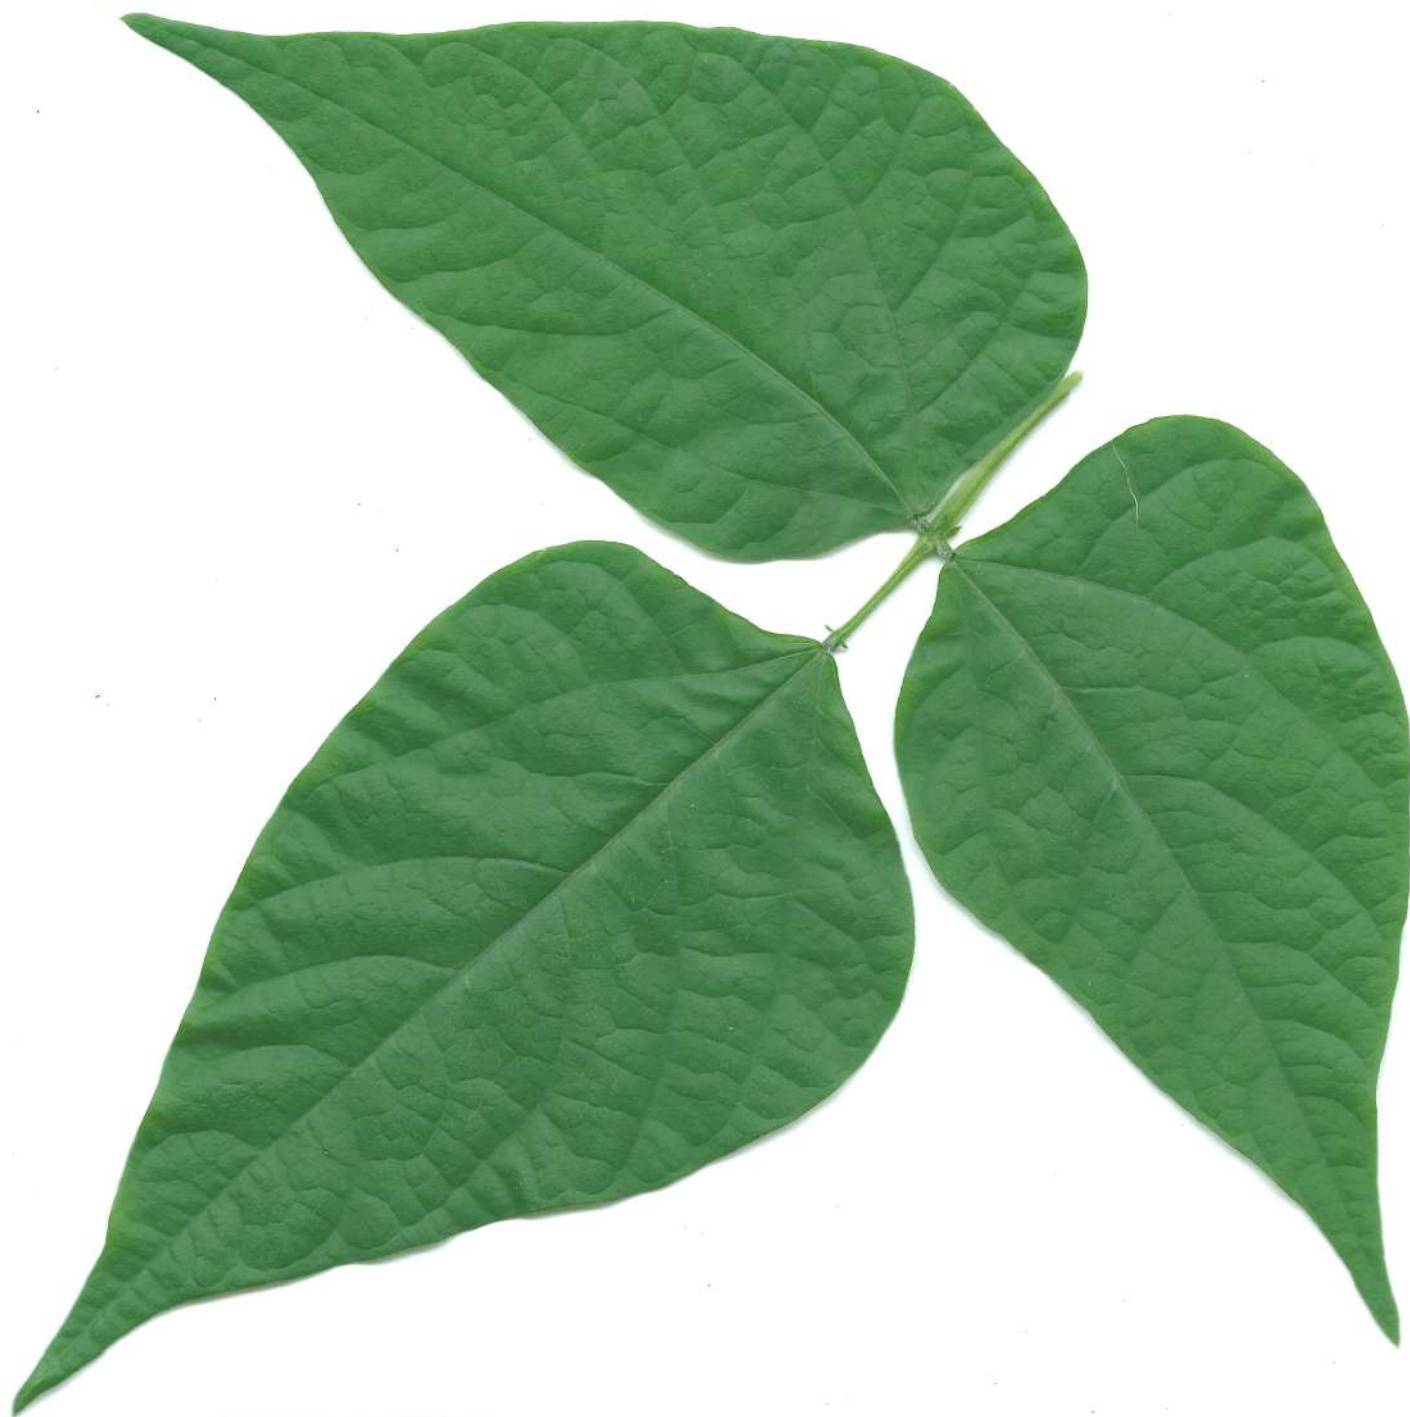

**12-5-2**

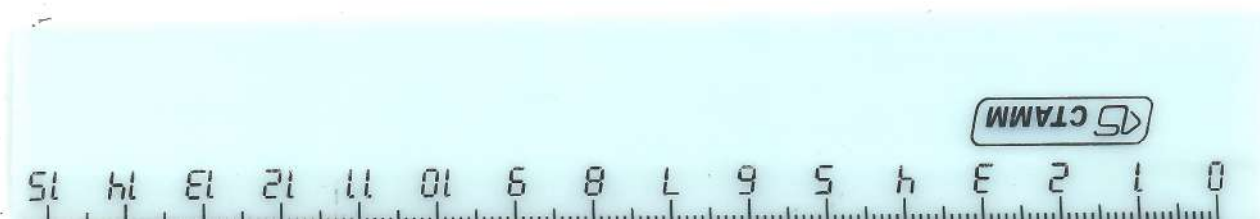



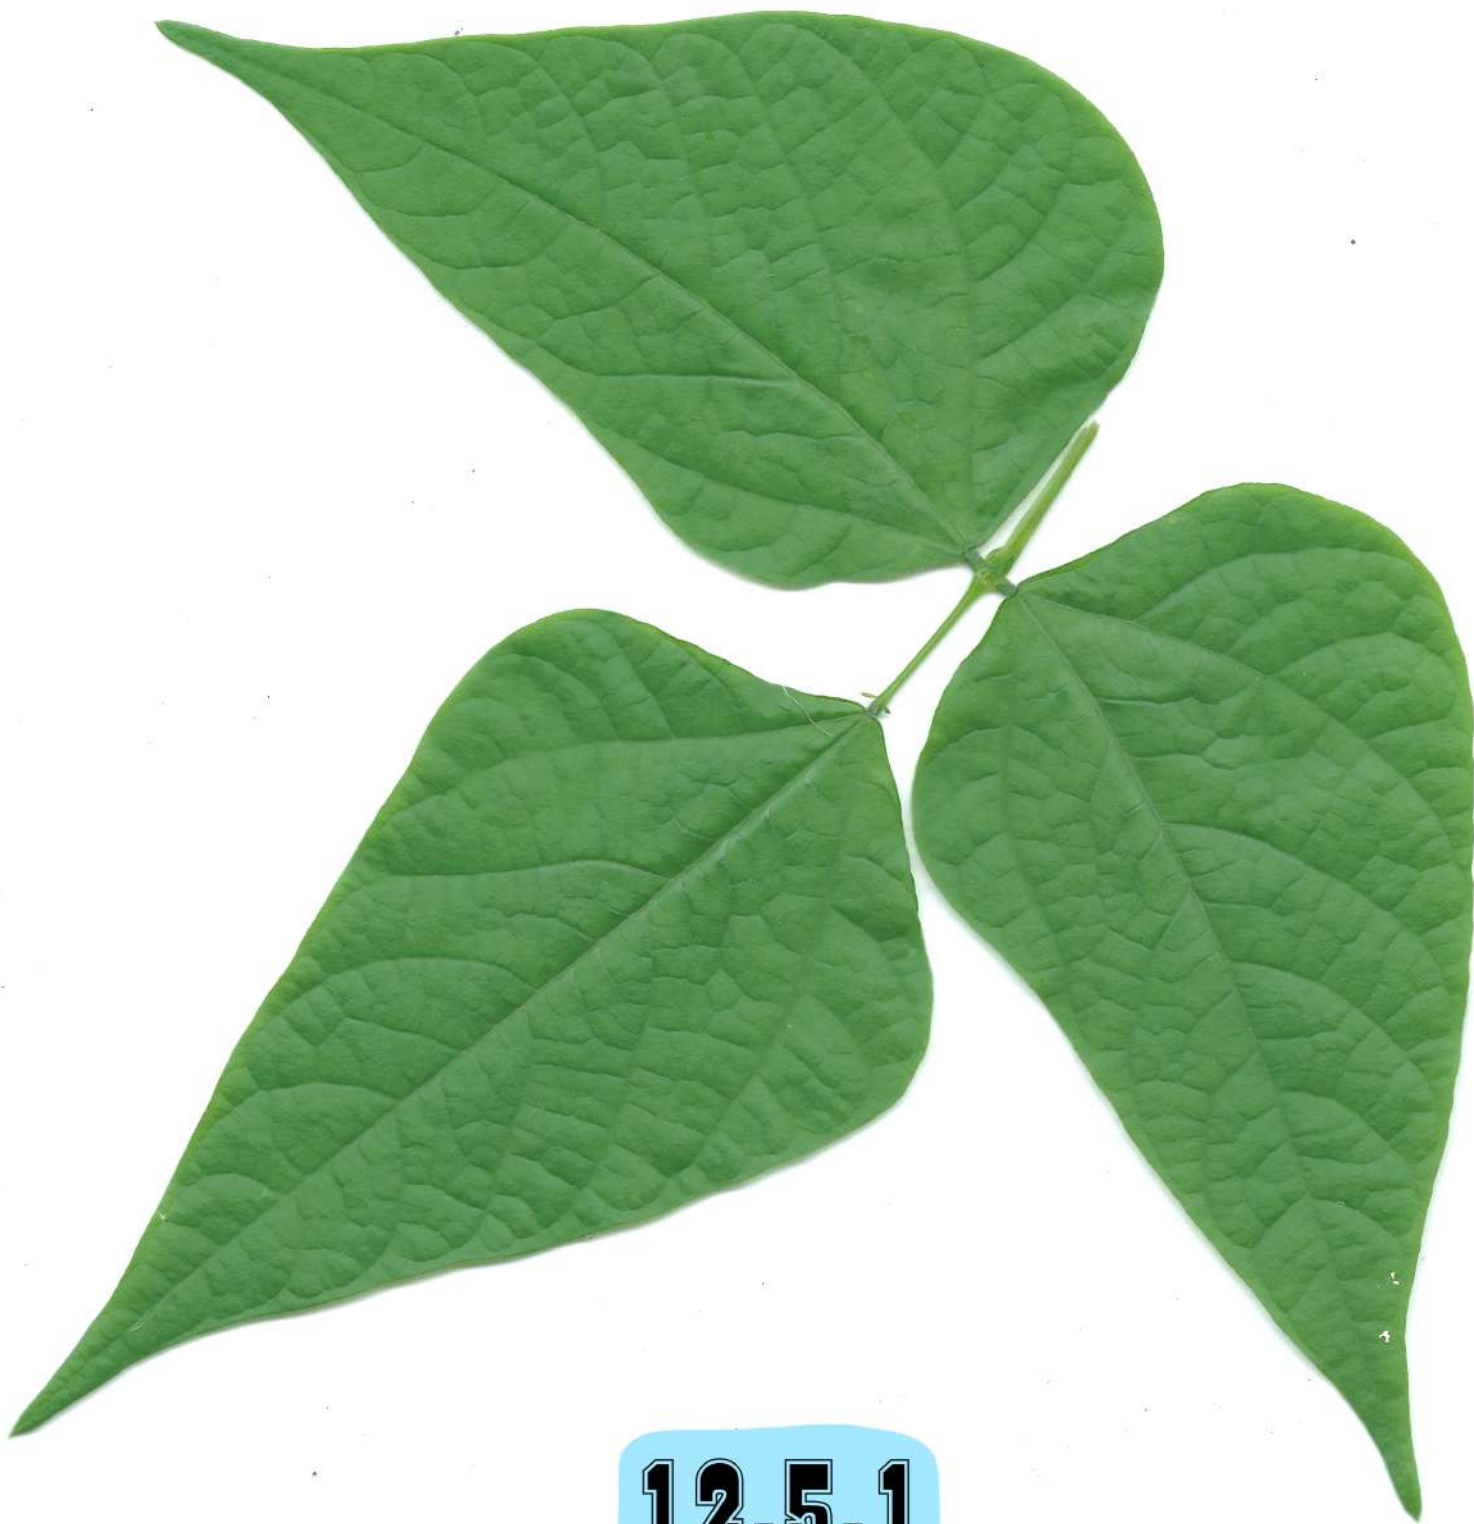

12-5-1

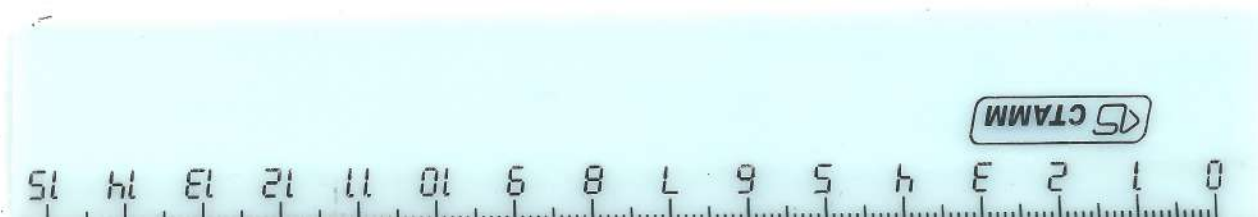



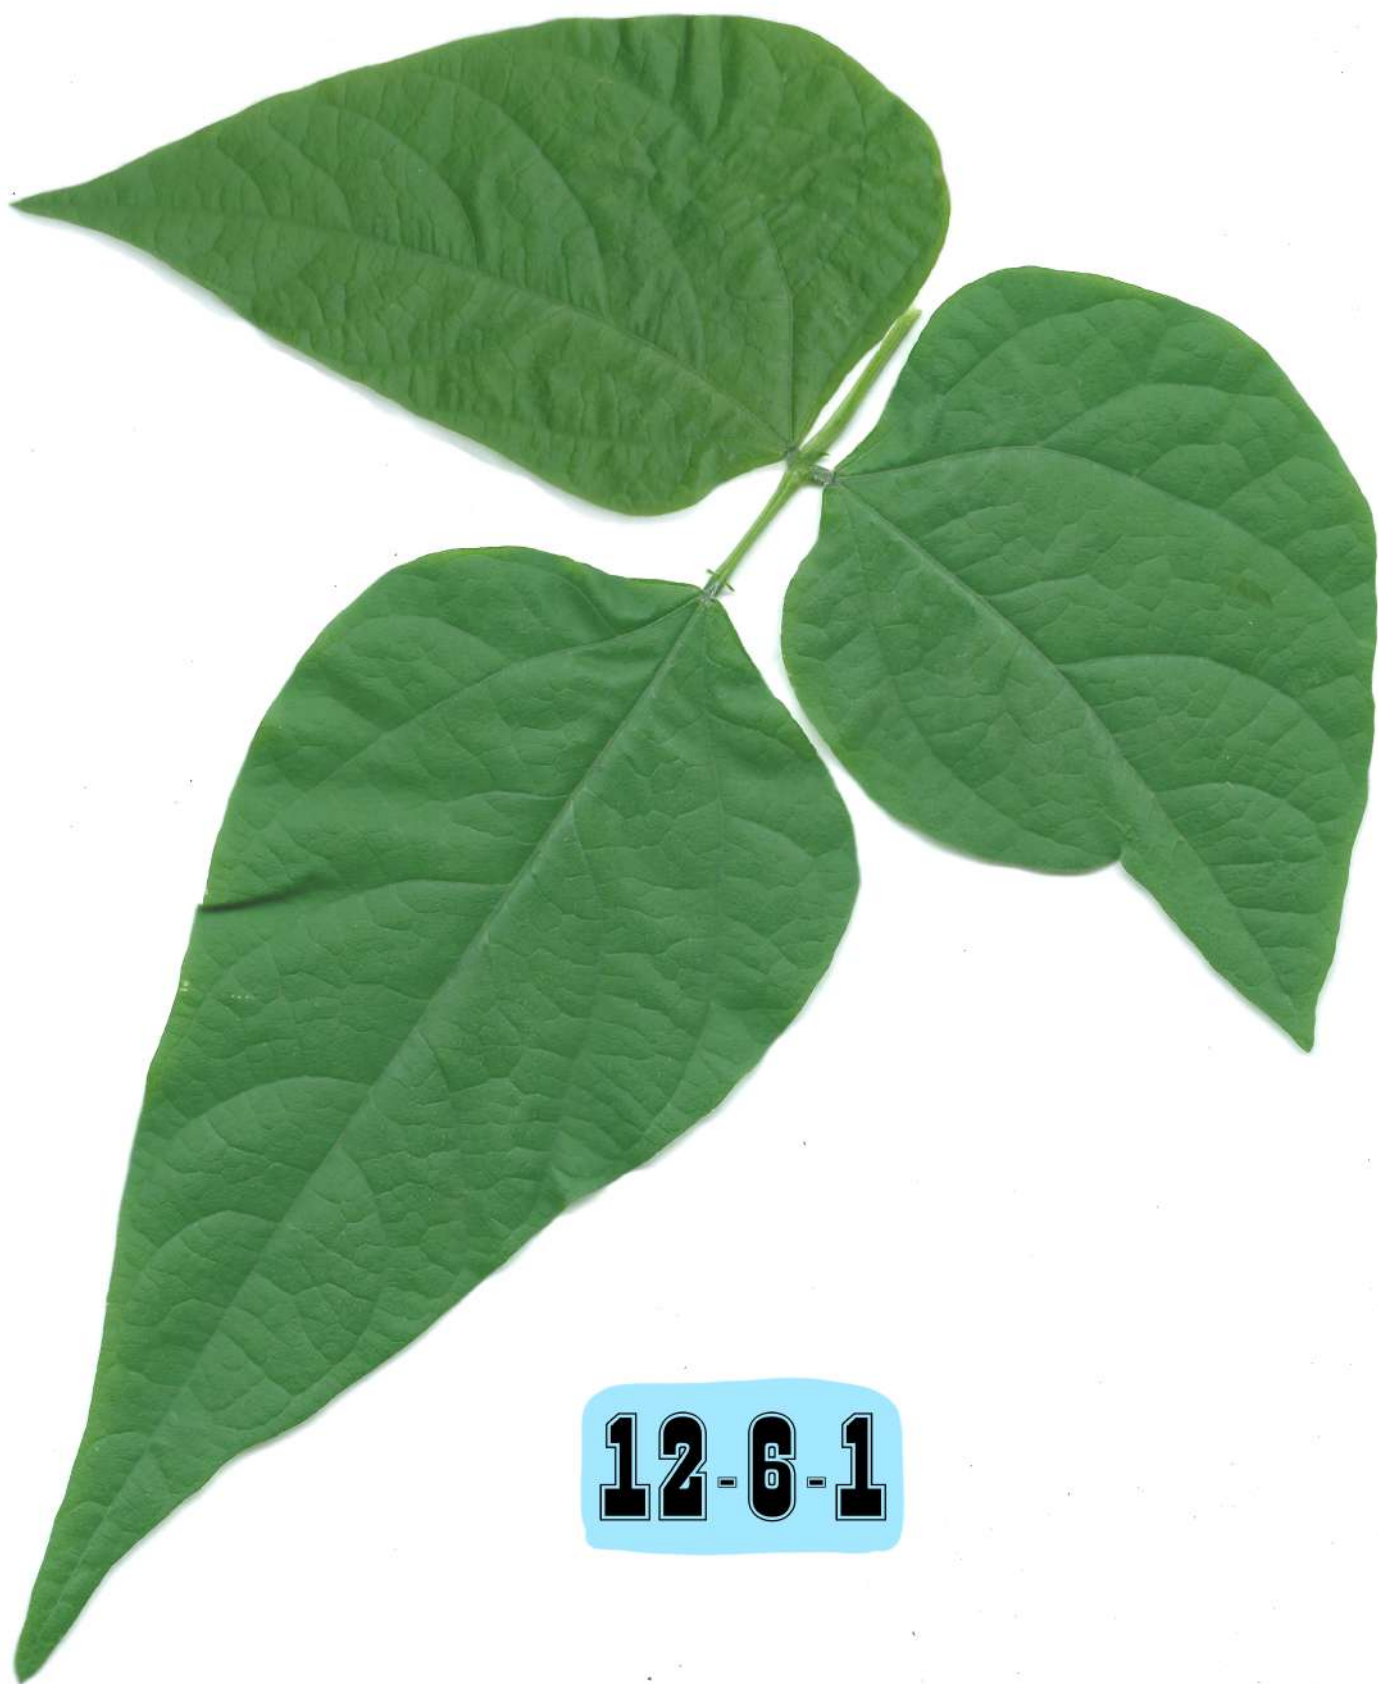

12-6-1

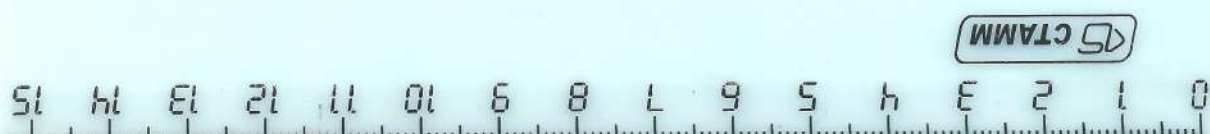

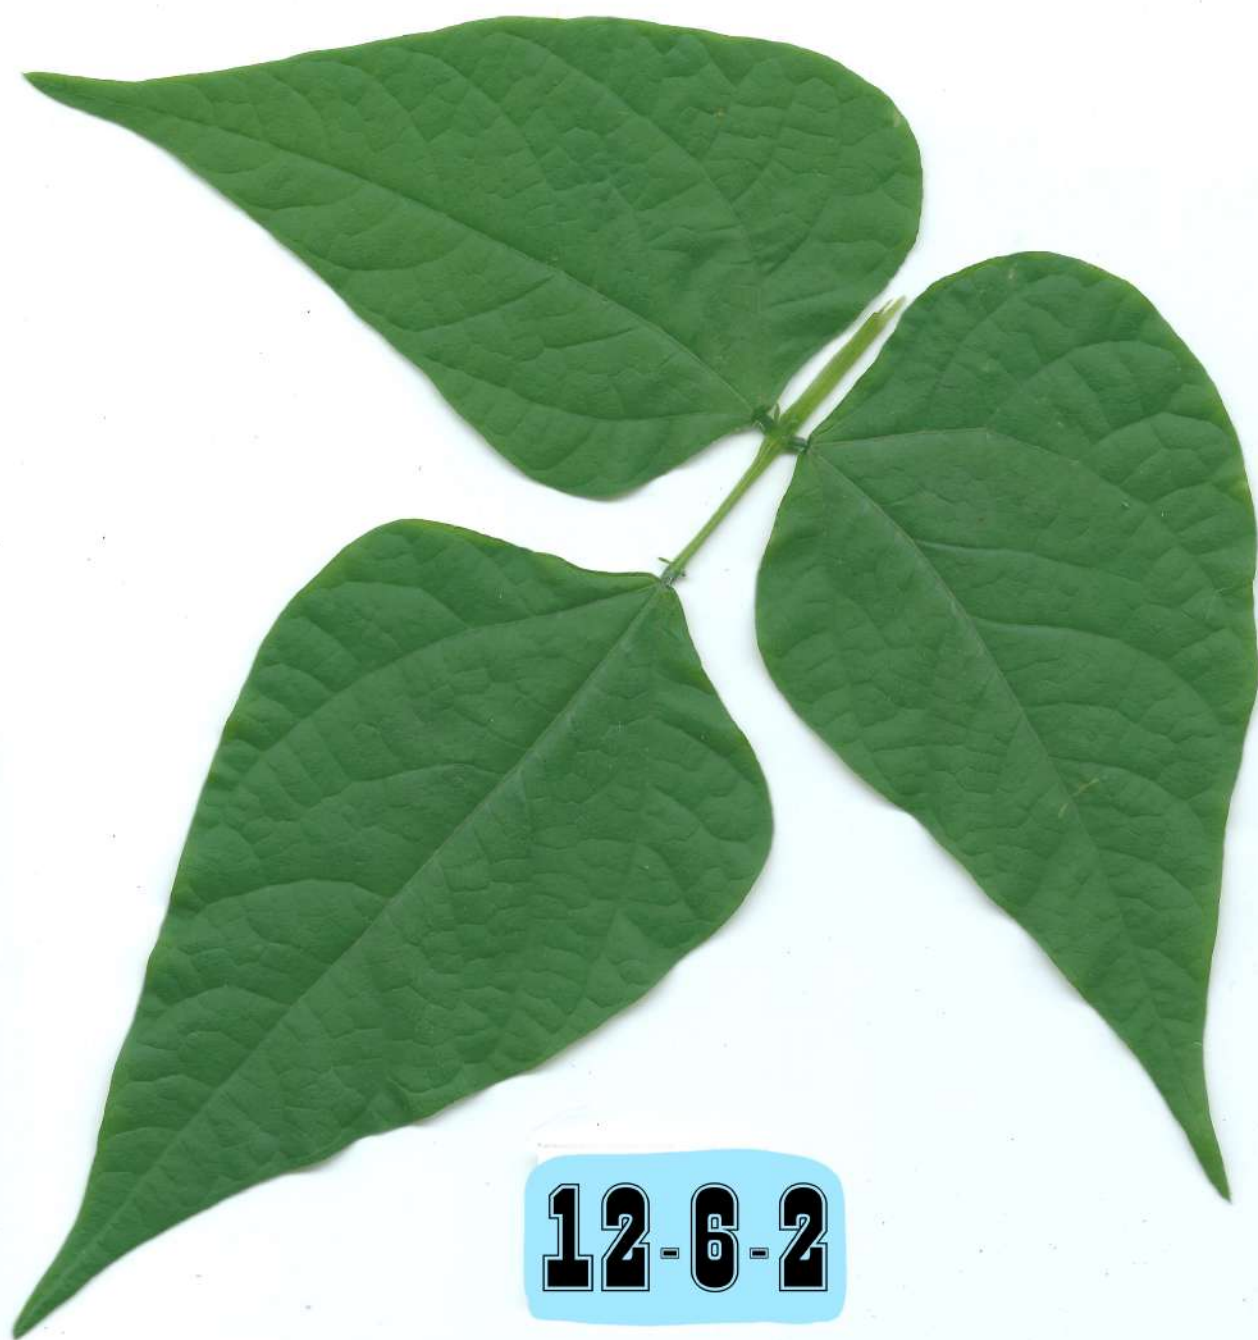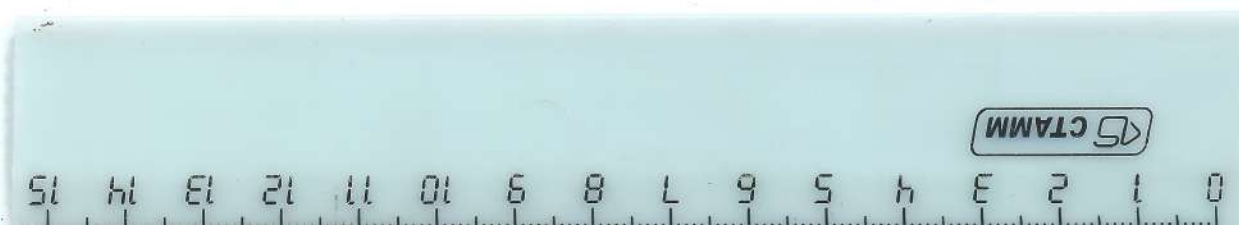

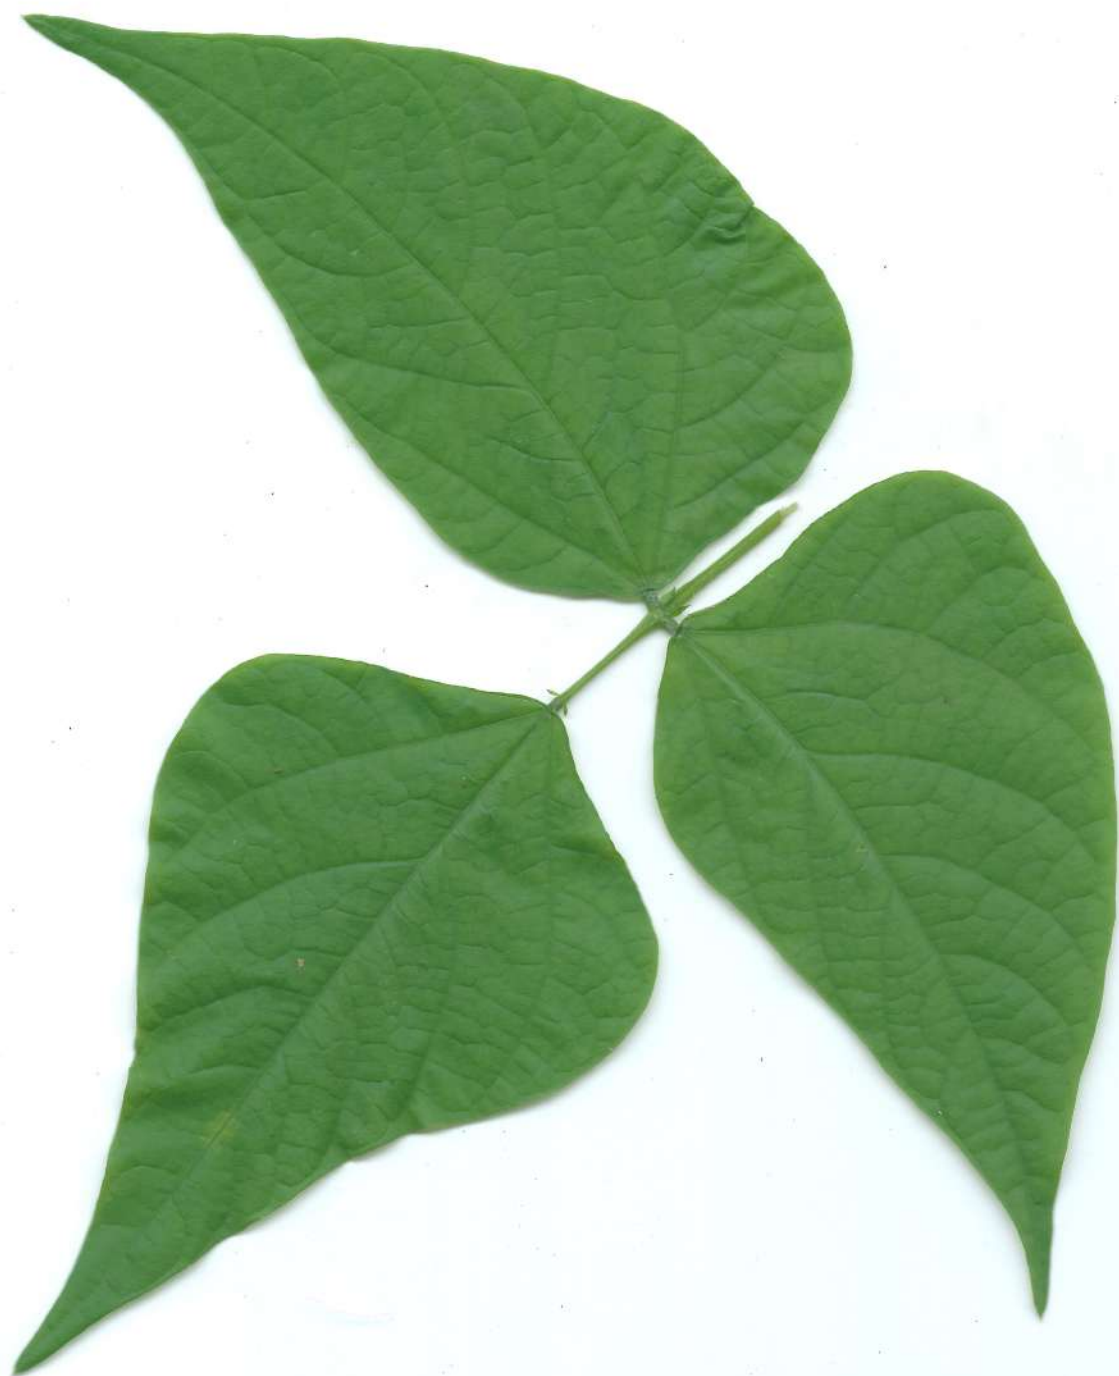

**12-6-3**

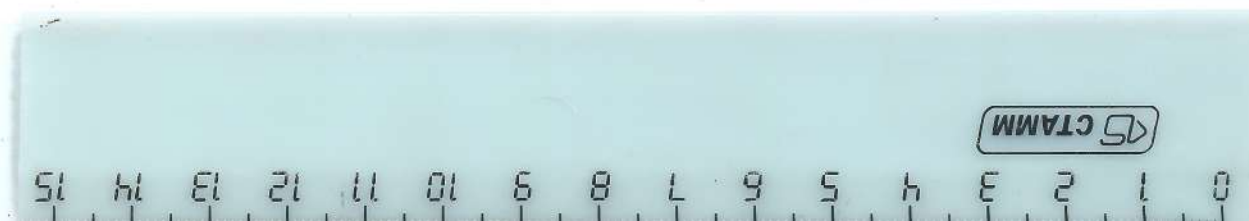



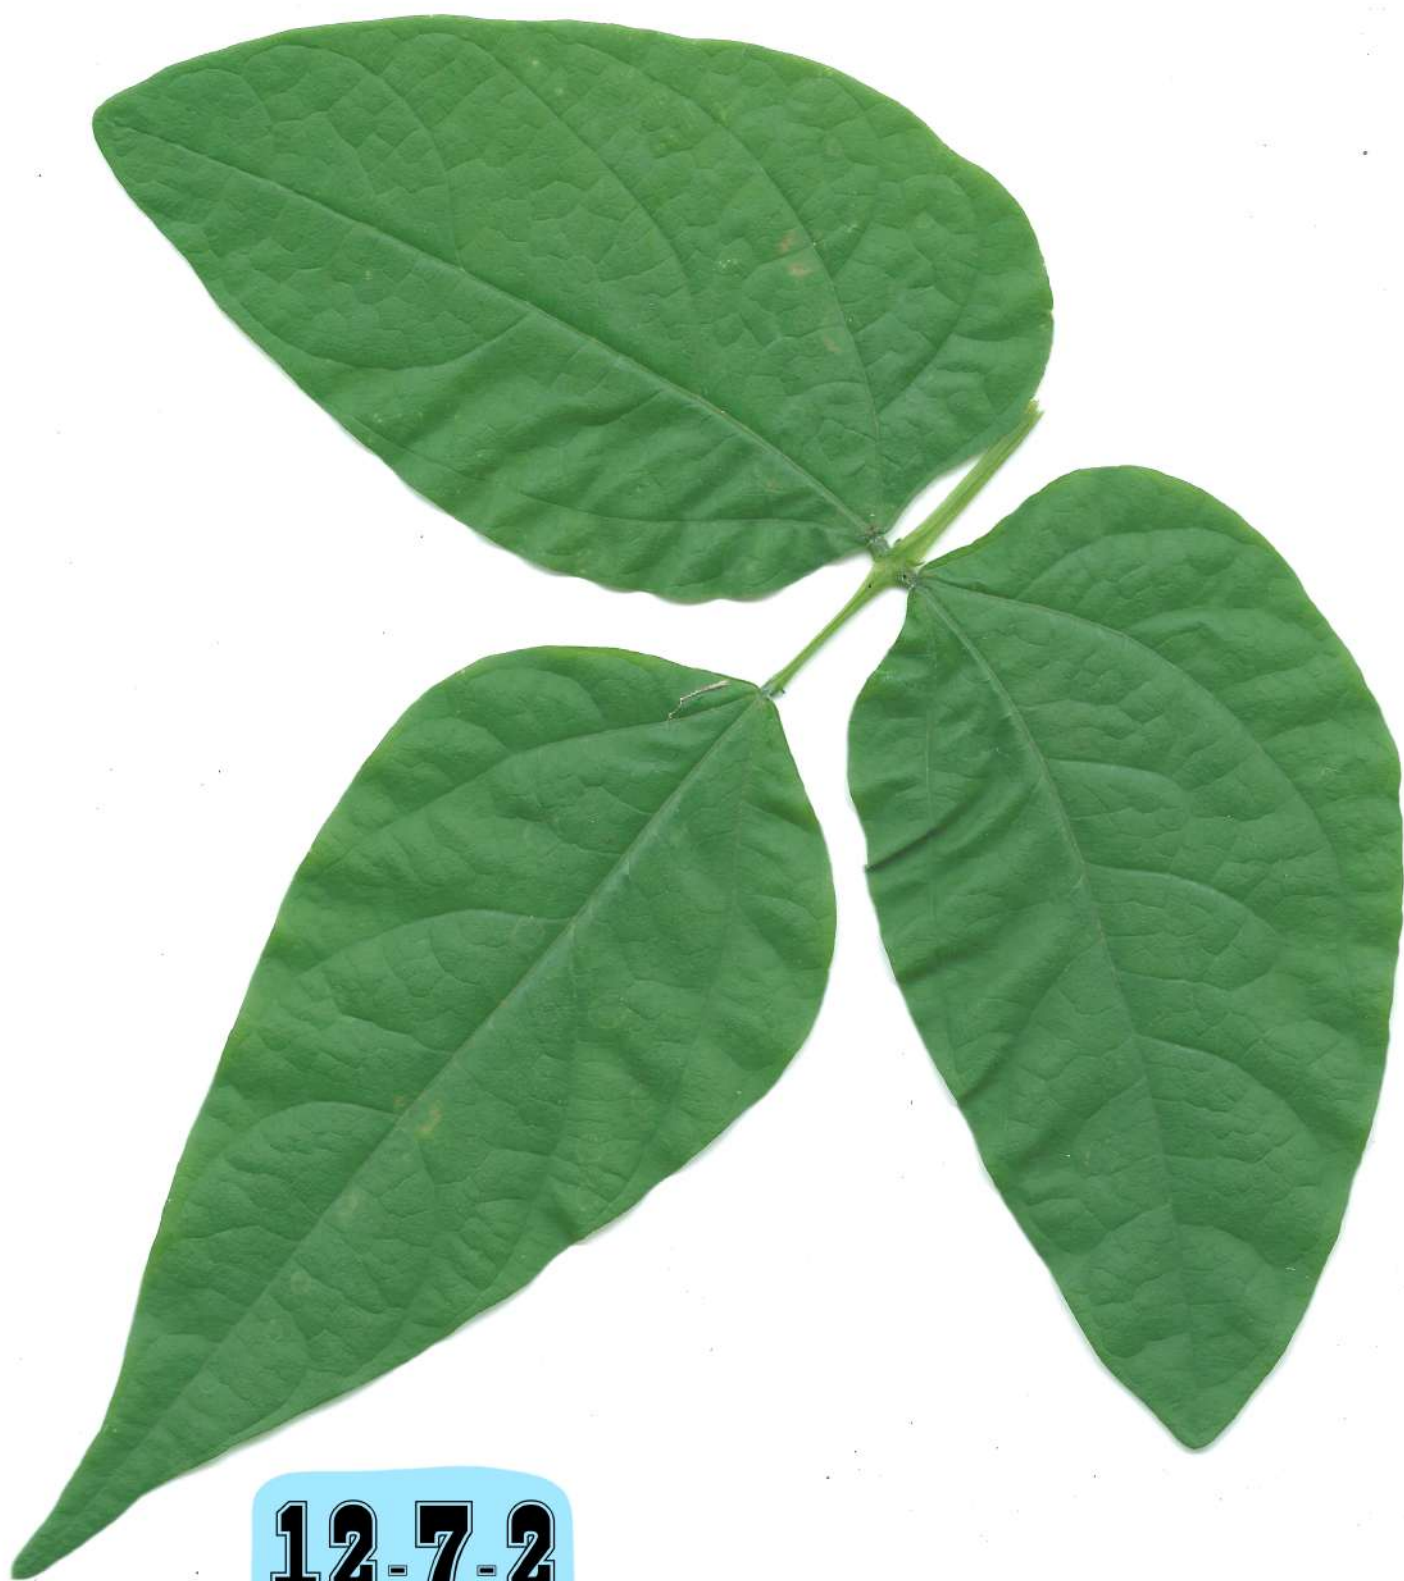

**12-7-2**

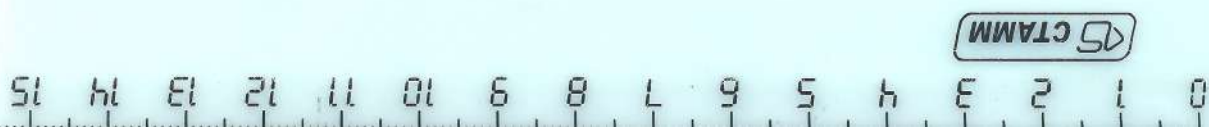



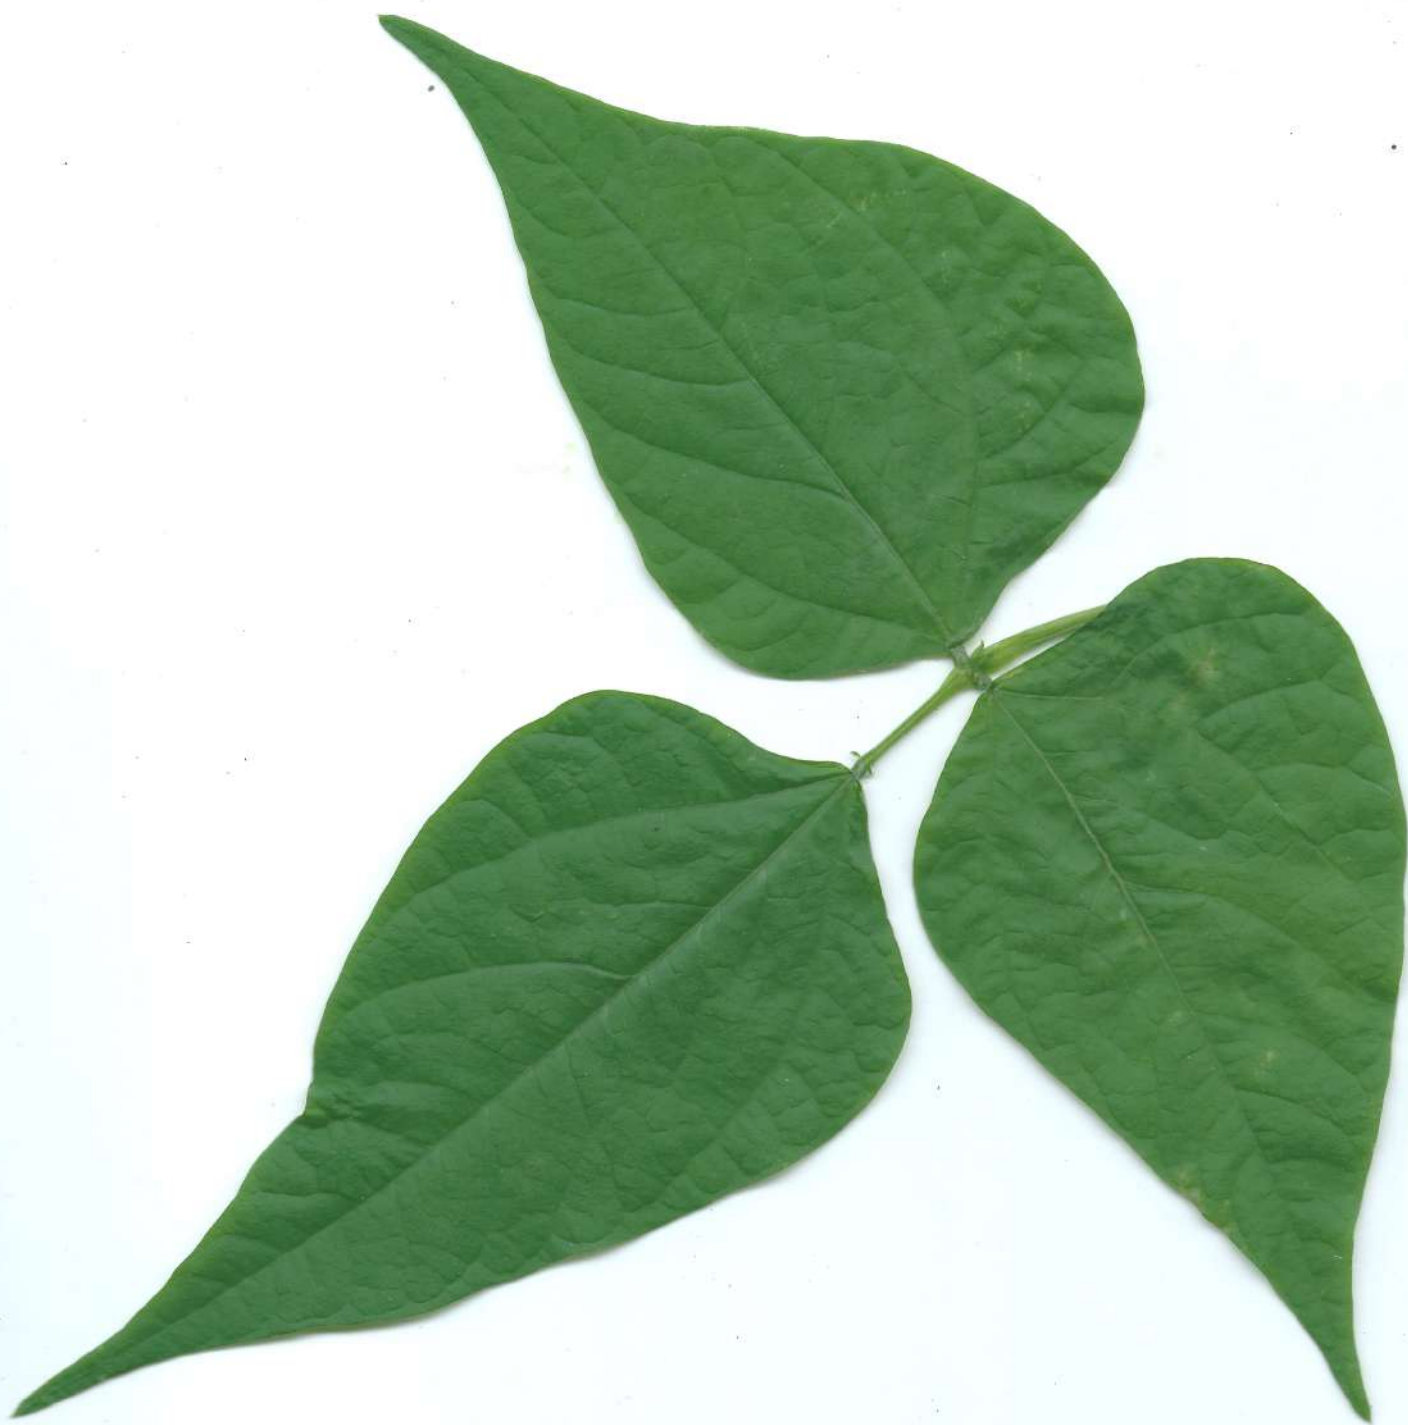

**12-7-1**

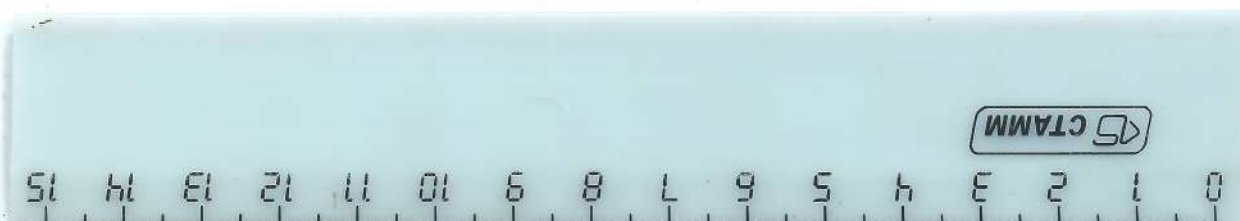

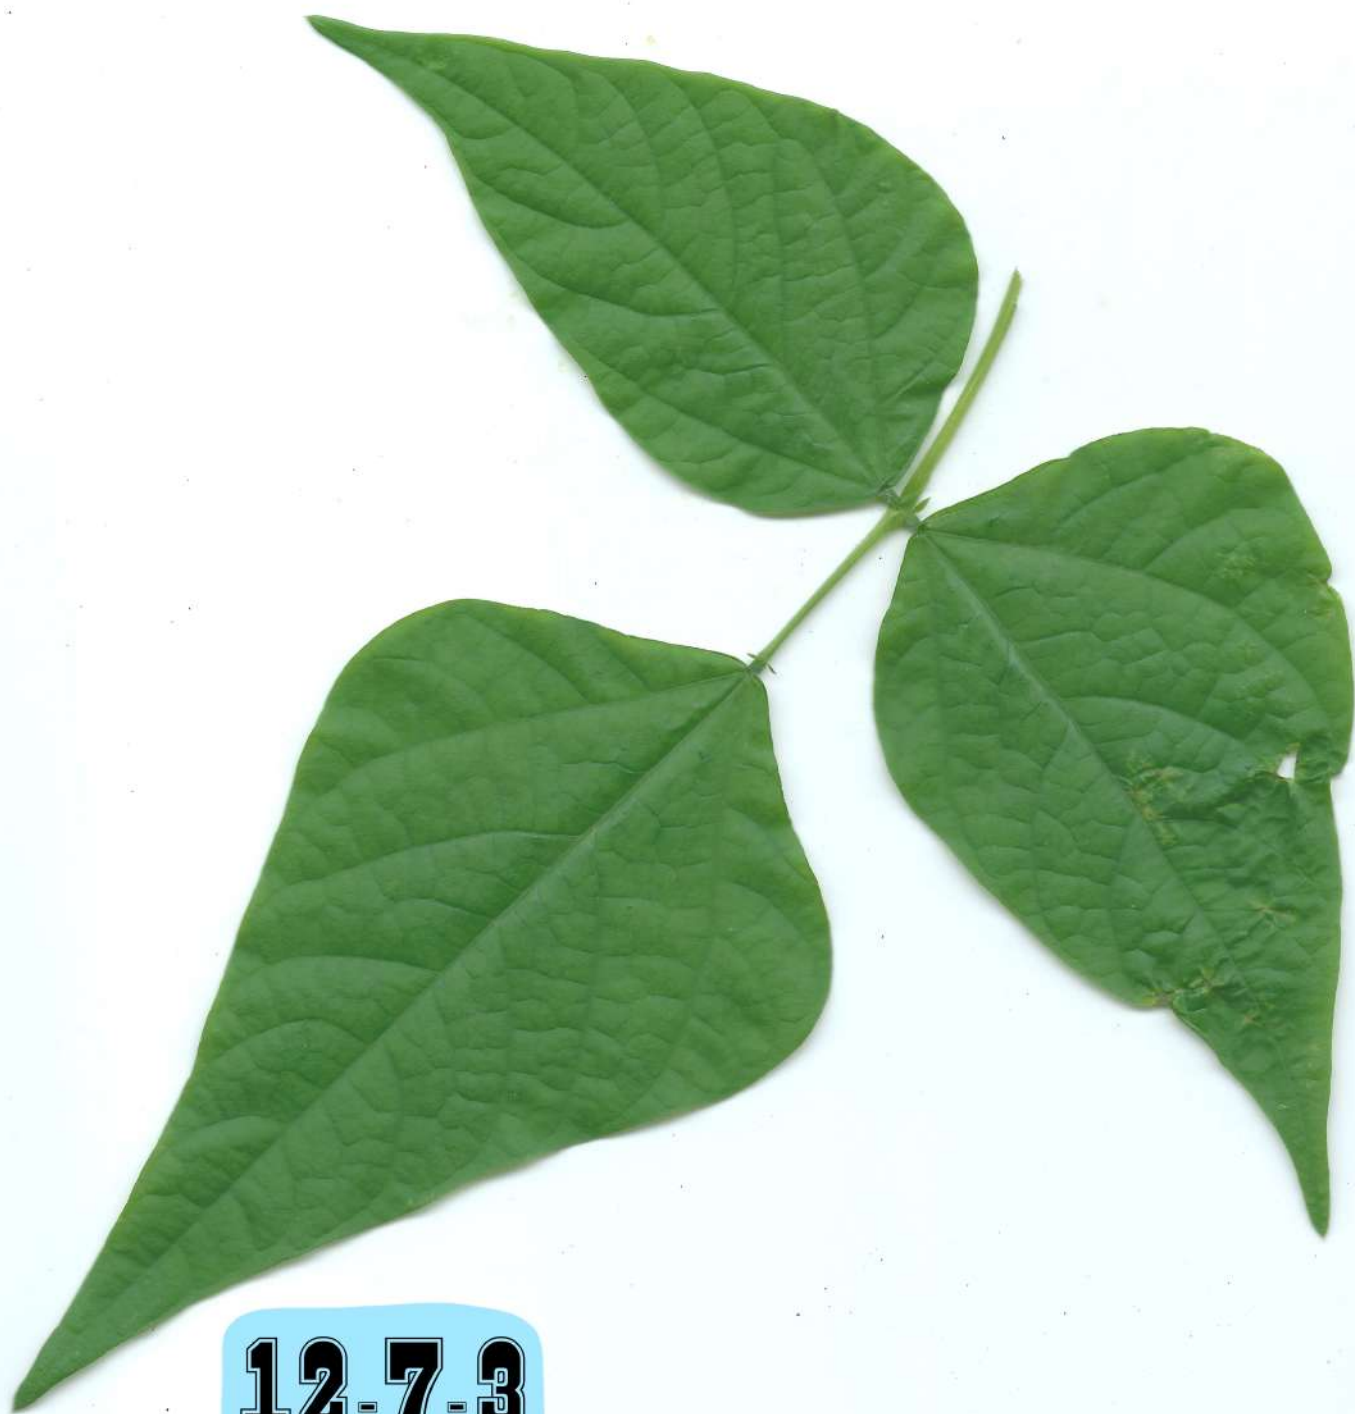

**12-7-3**

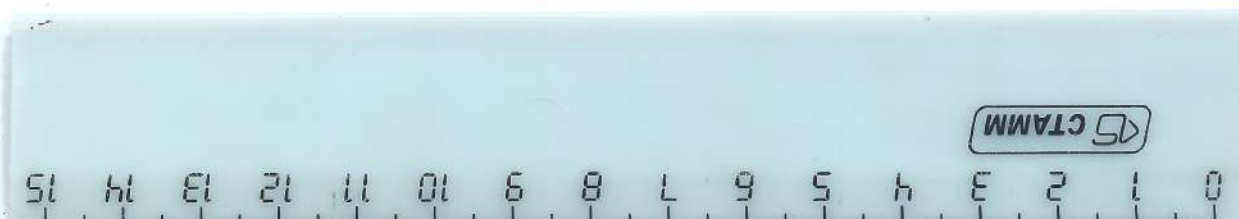

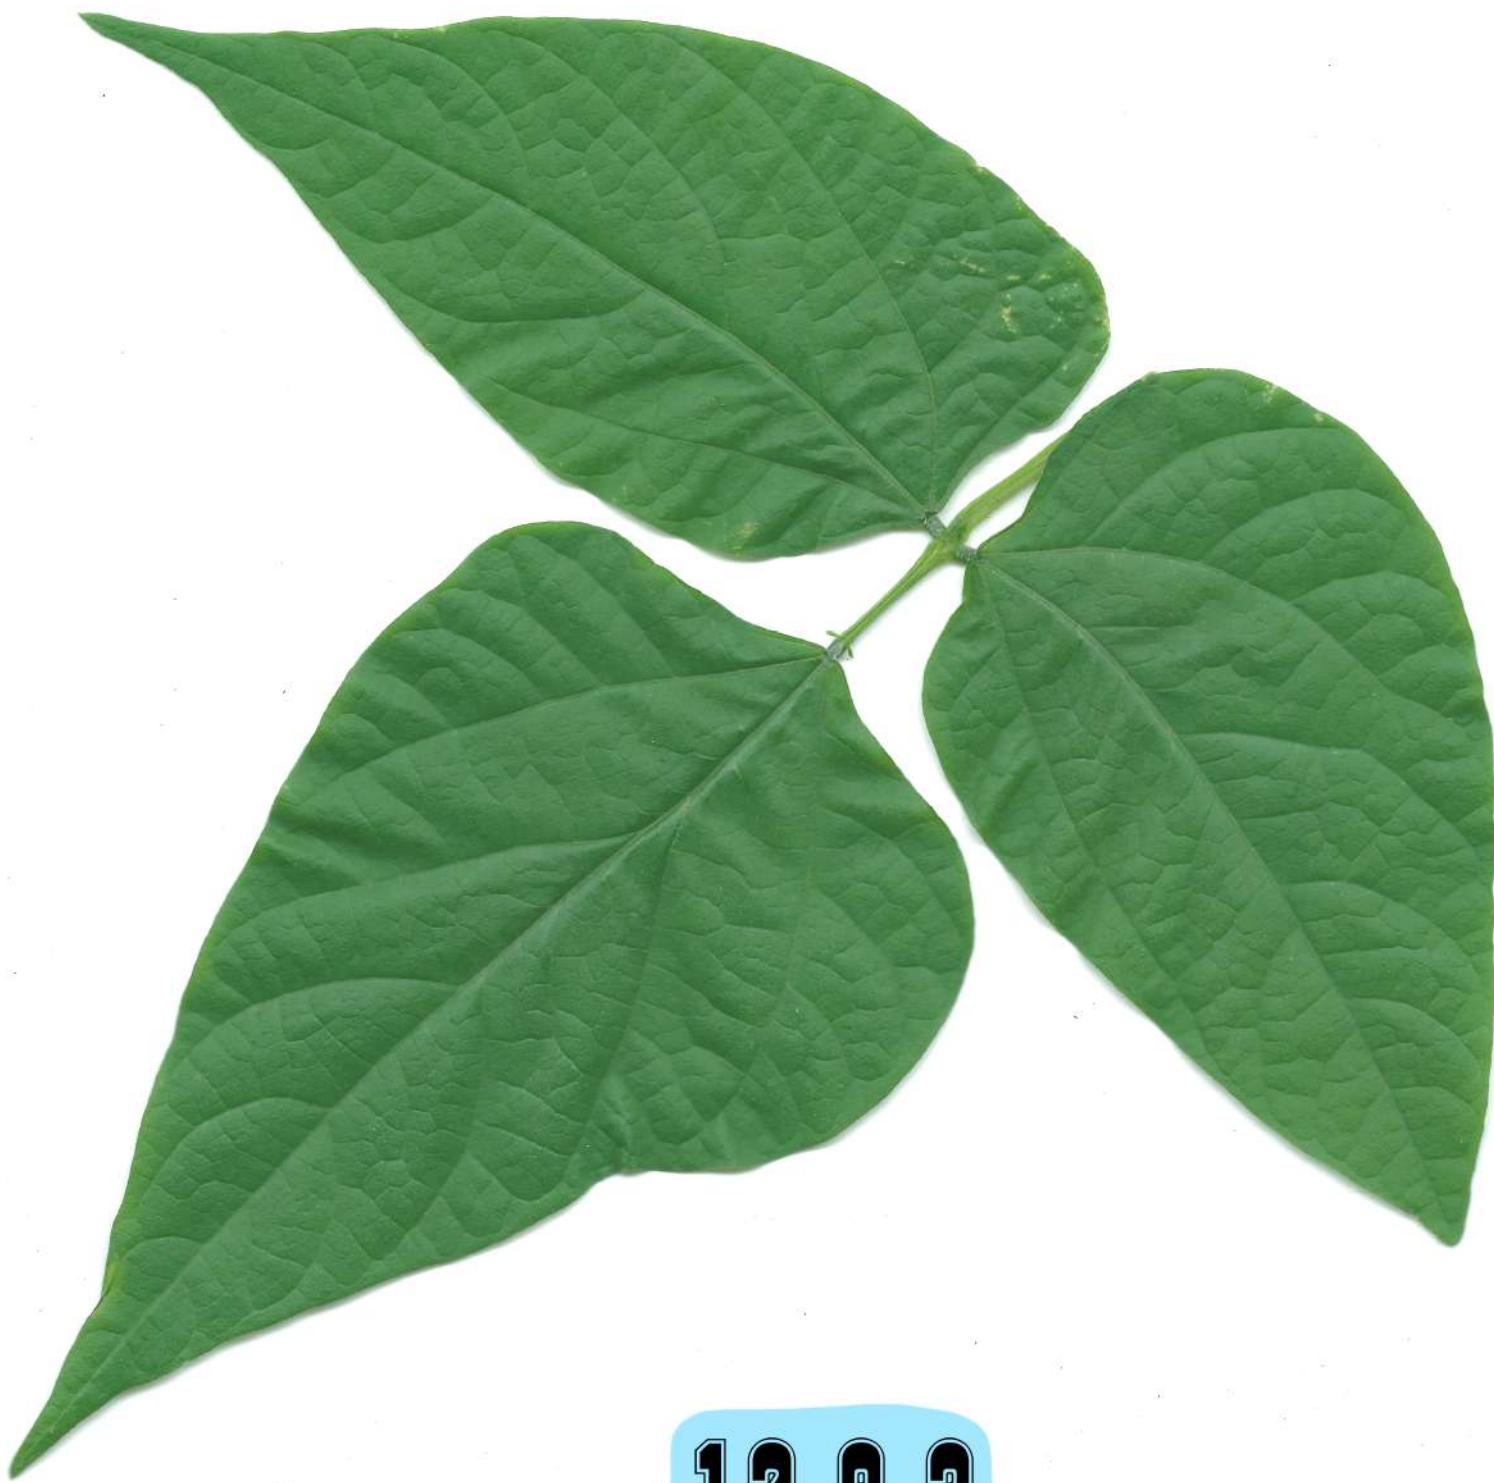

12-8-3

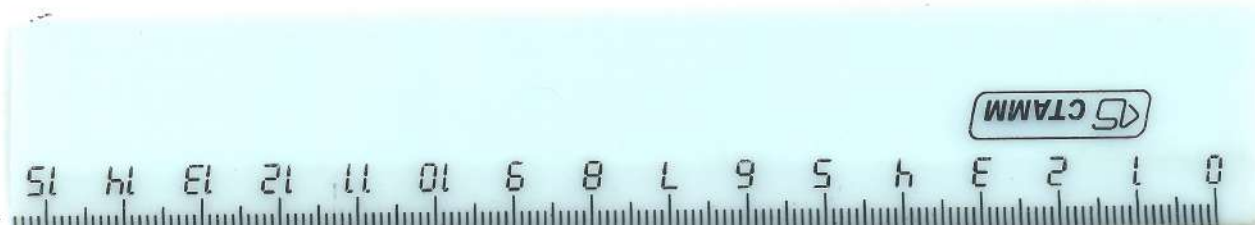



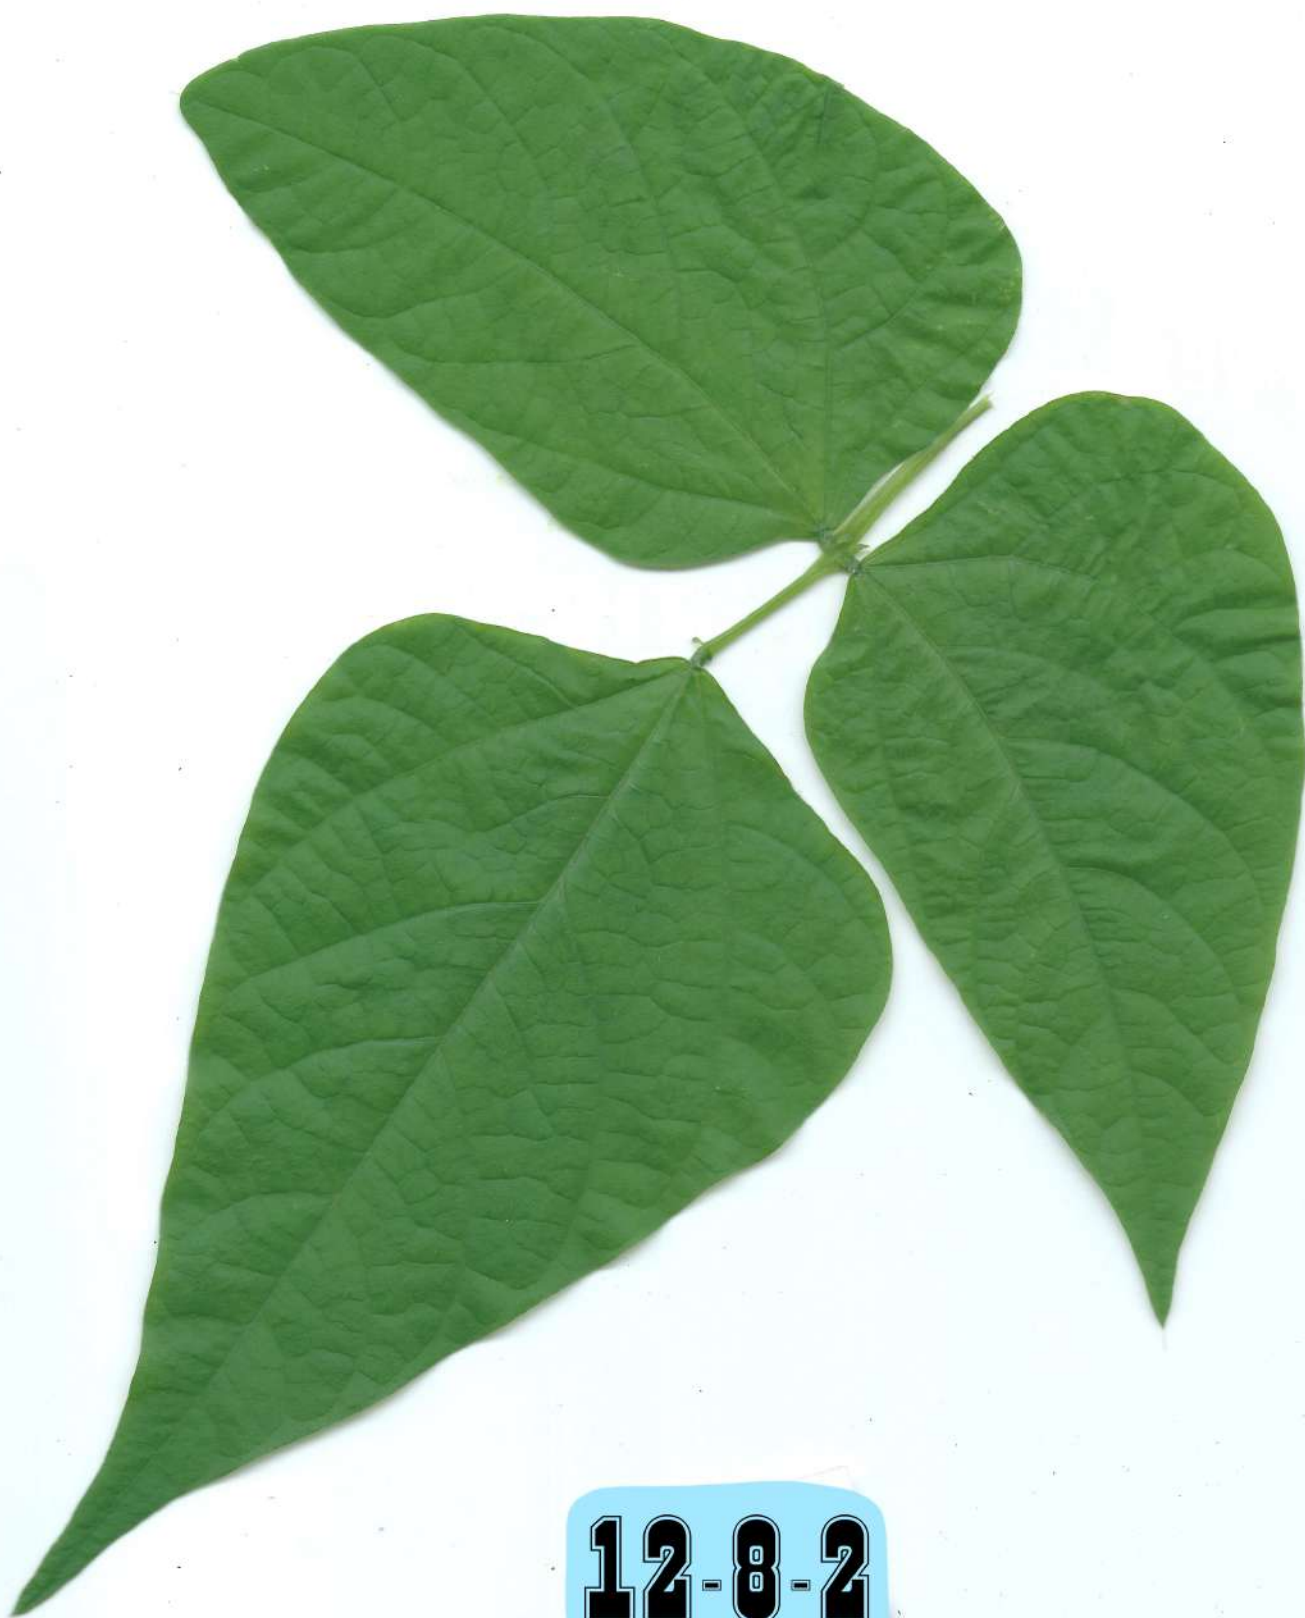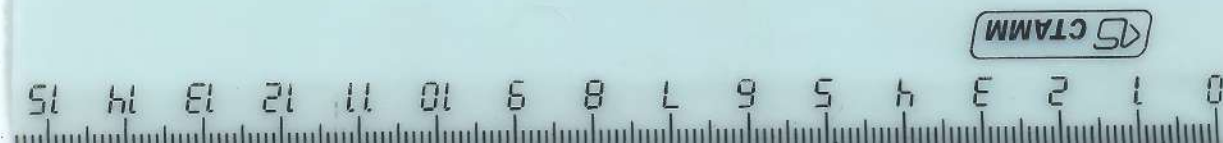



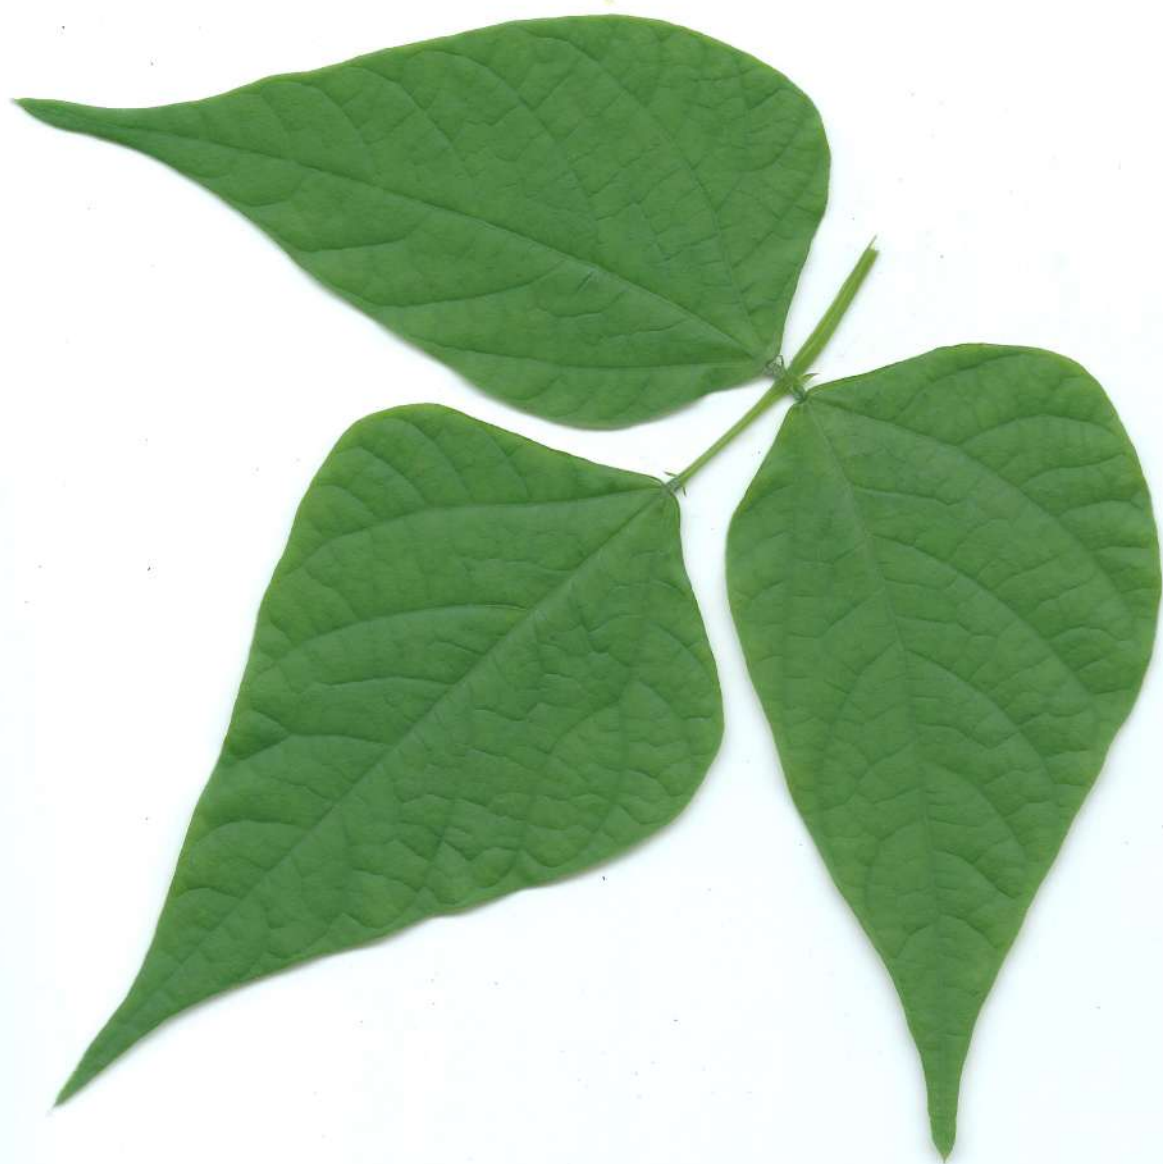

12-8-1

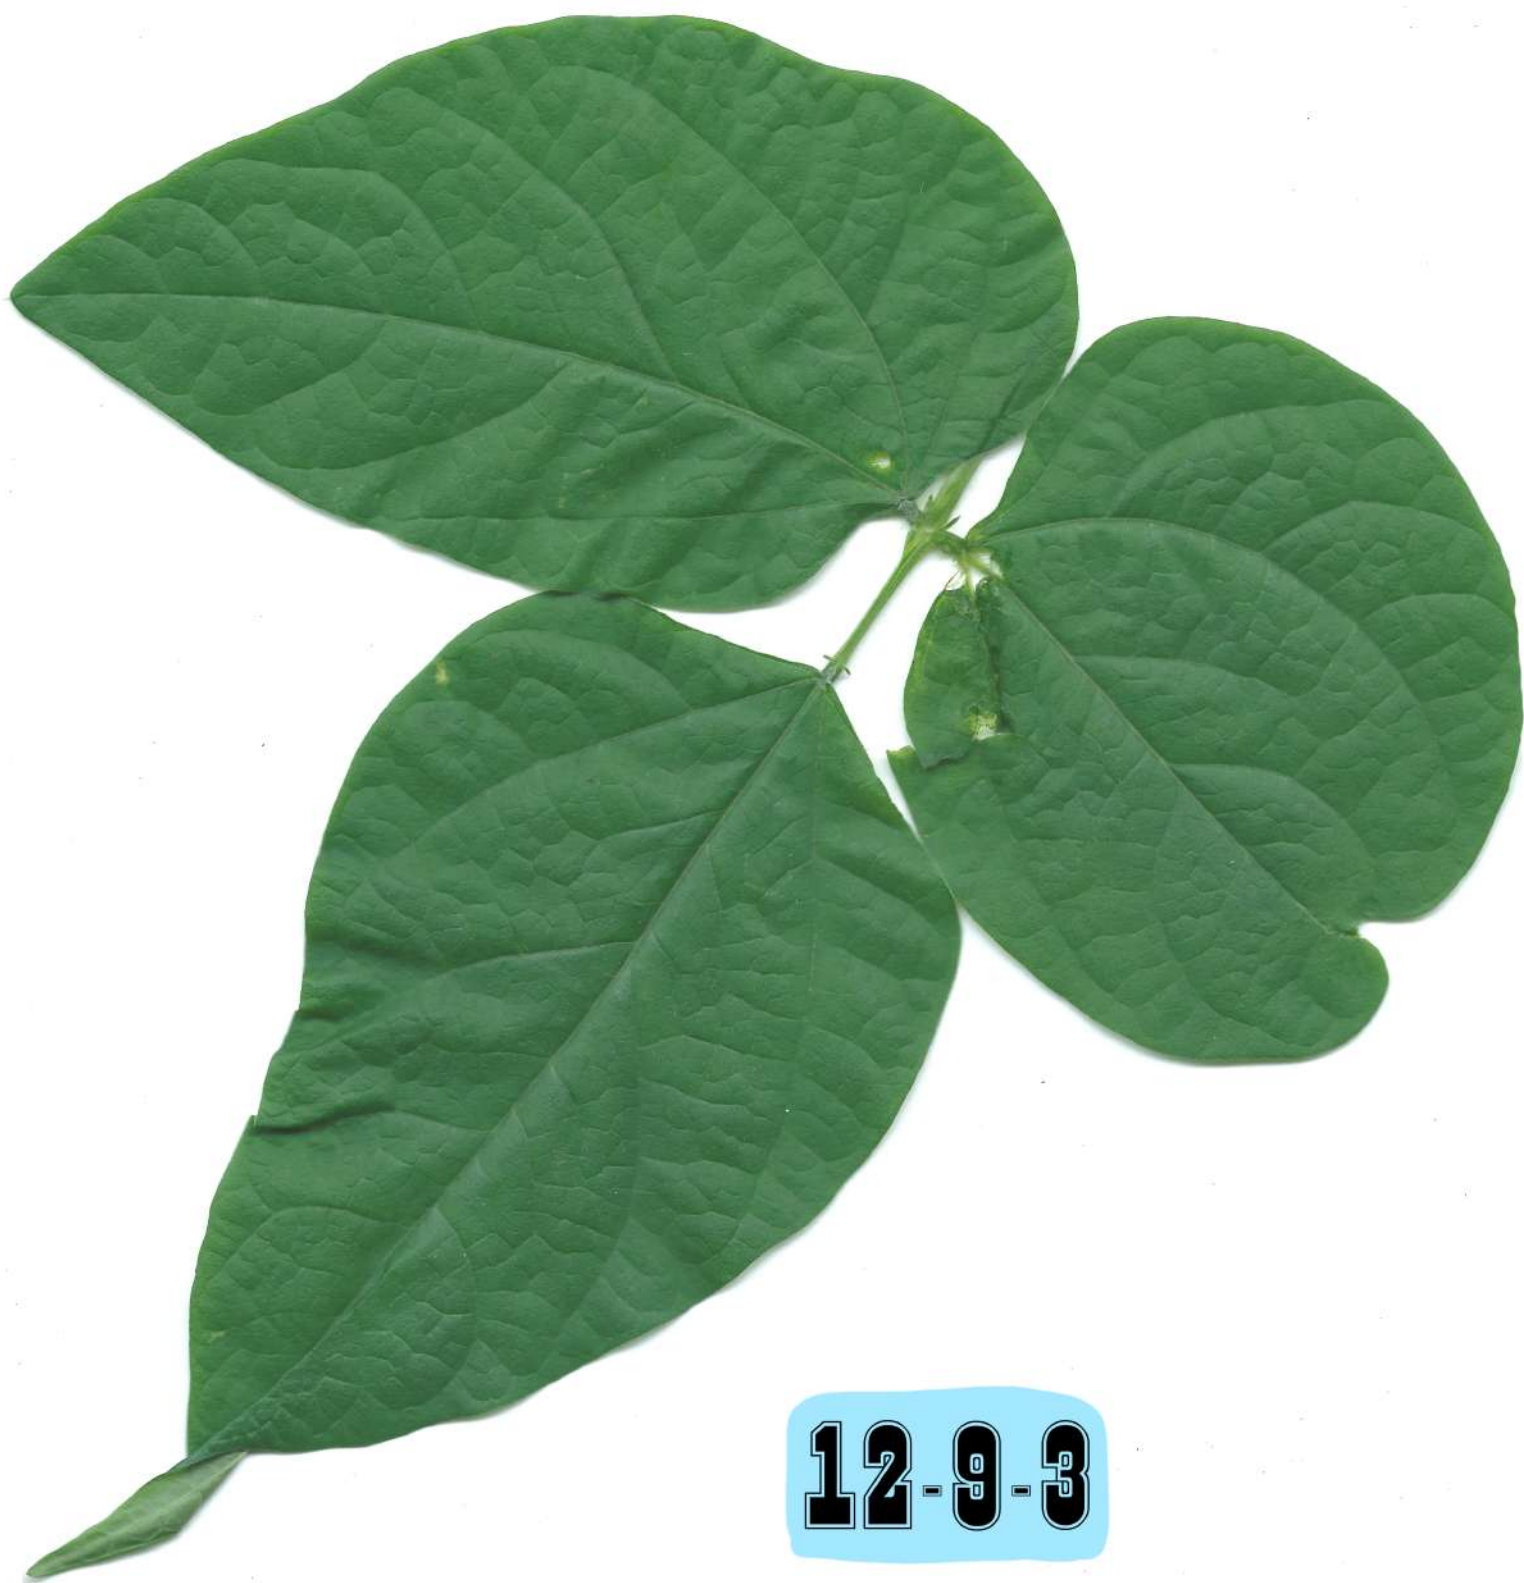

12-9-3

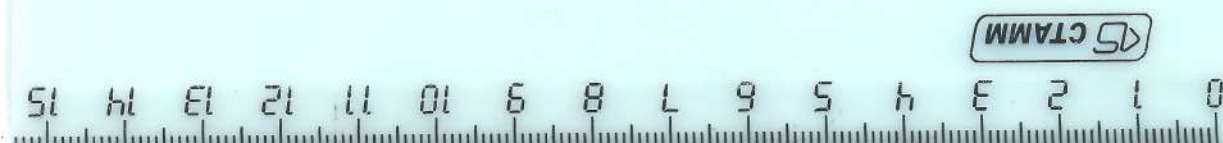

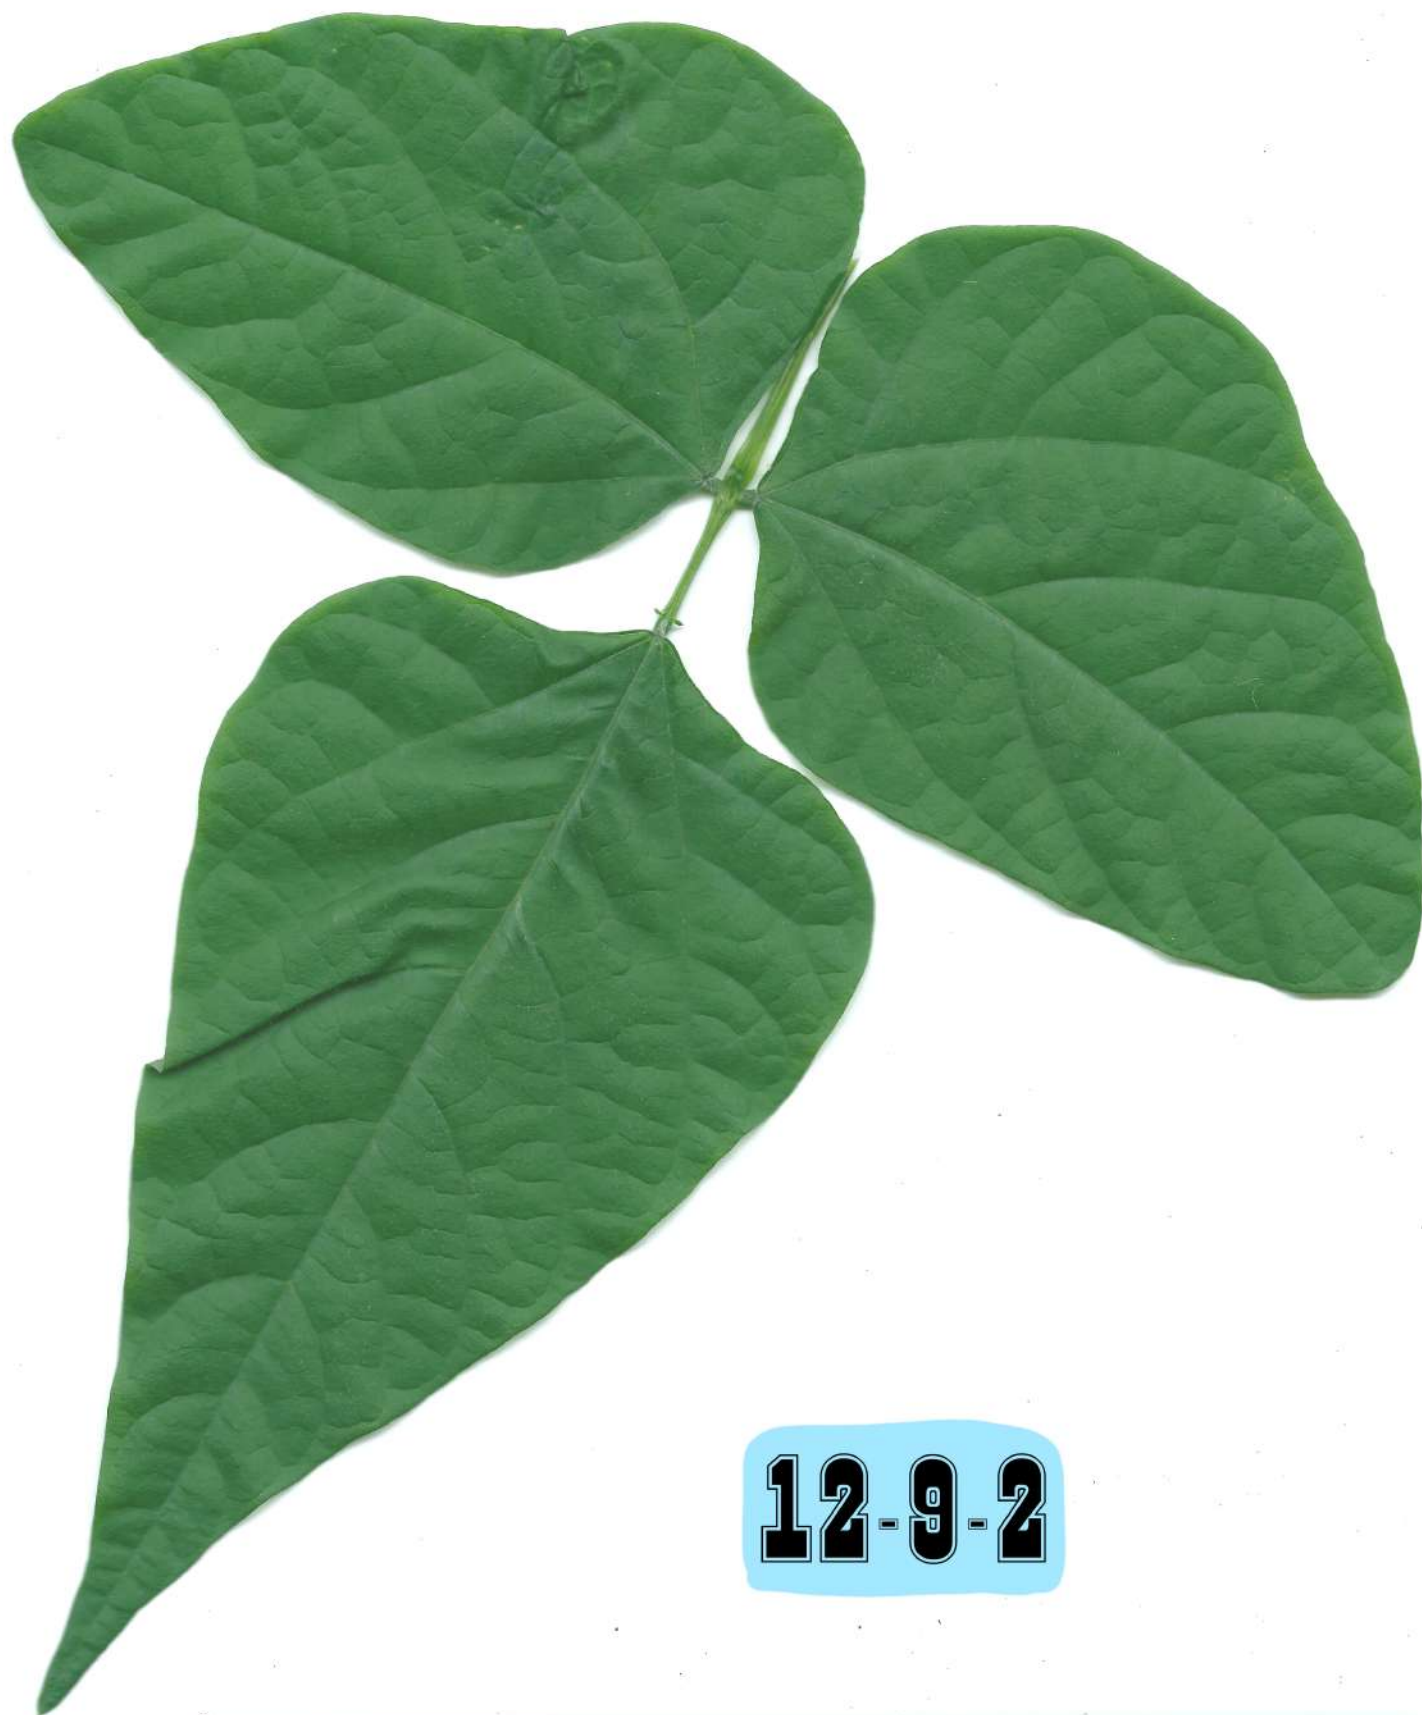

12-9-2

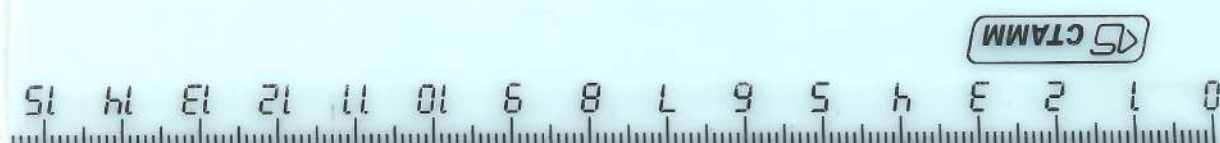



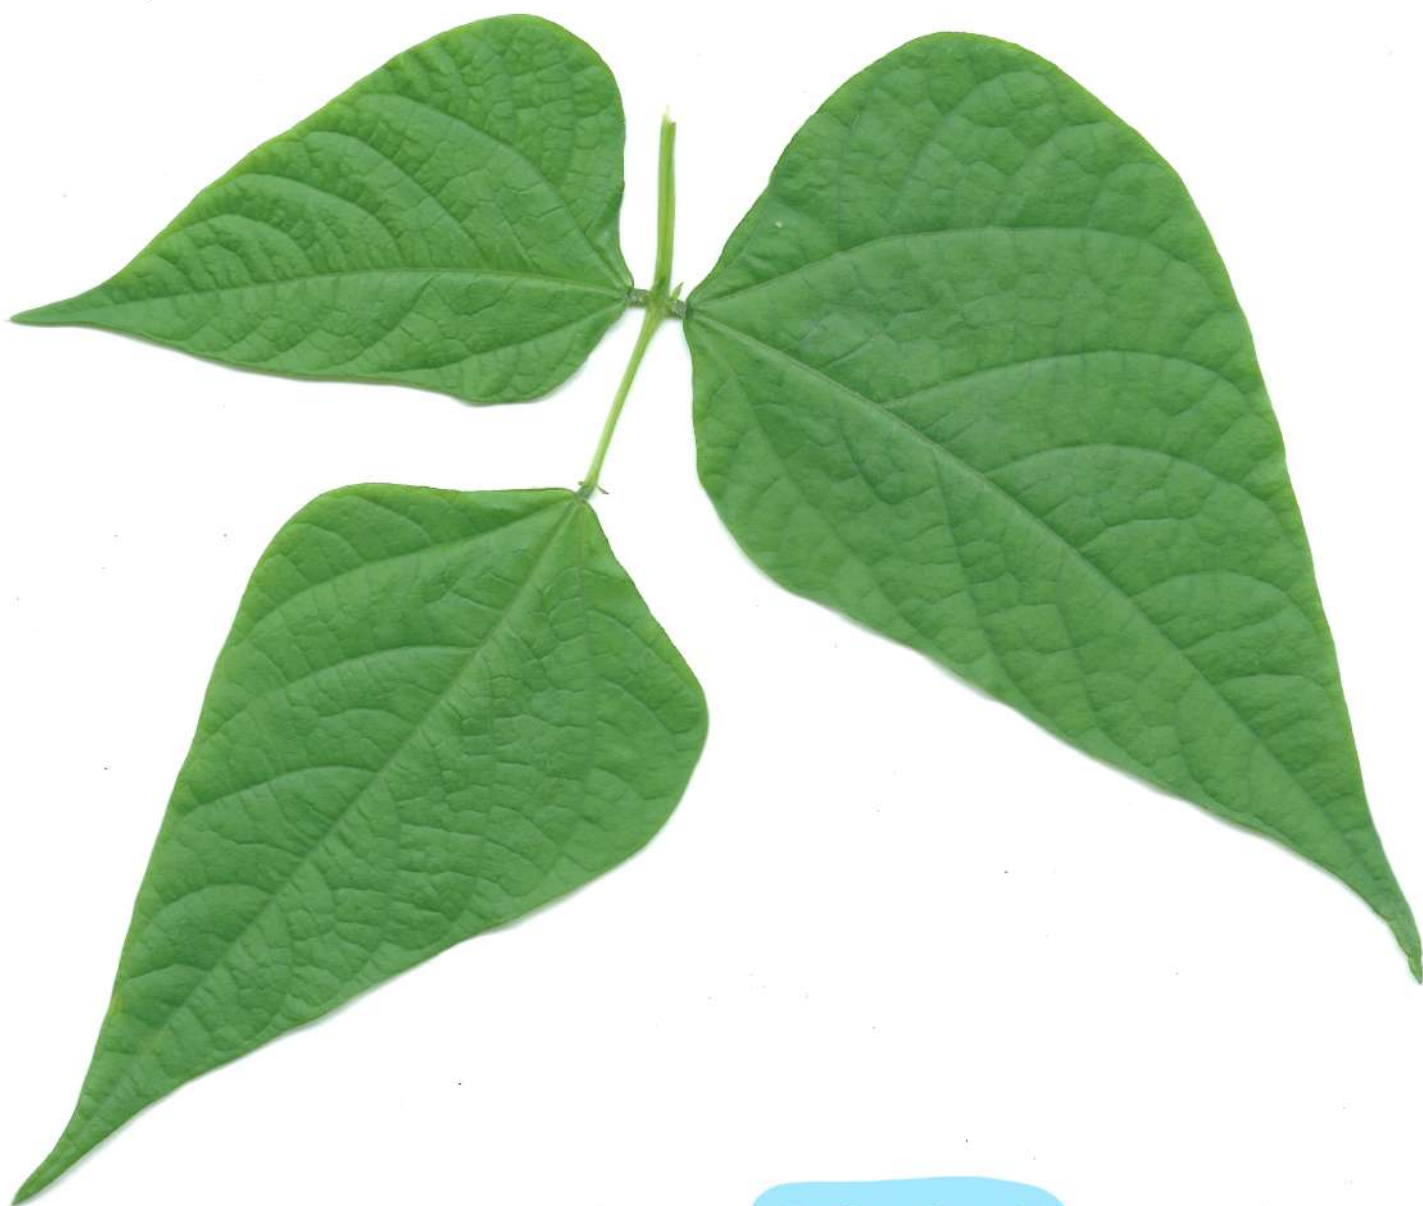

**12-9-1**

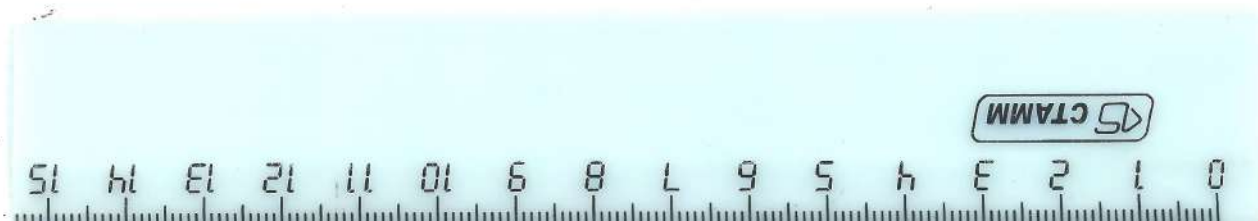



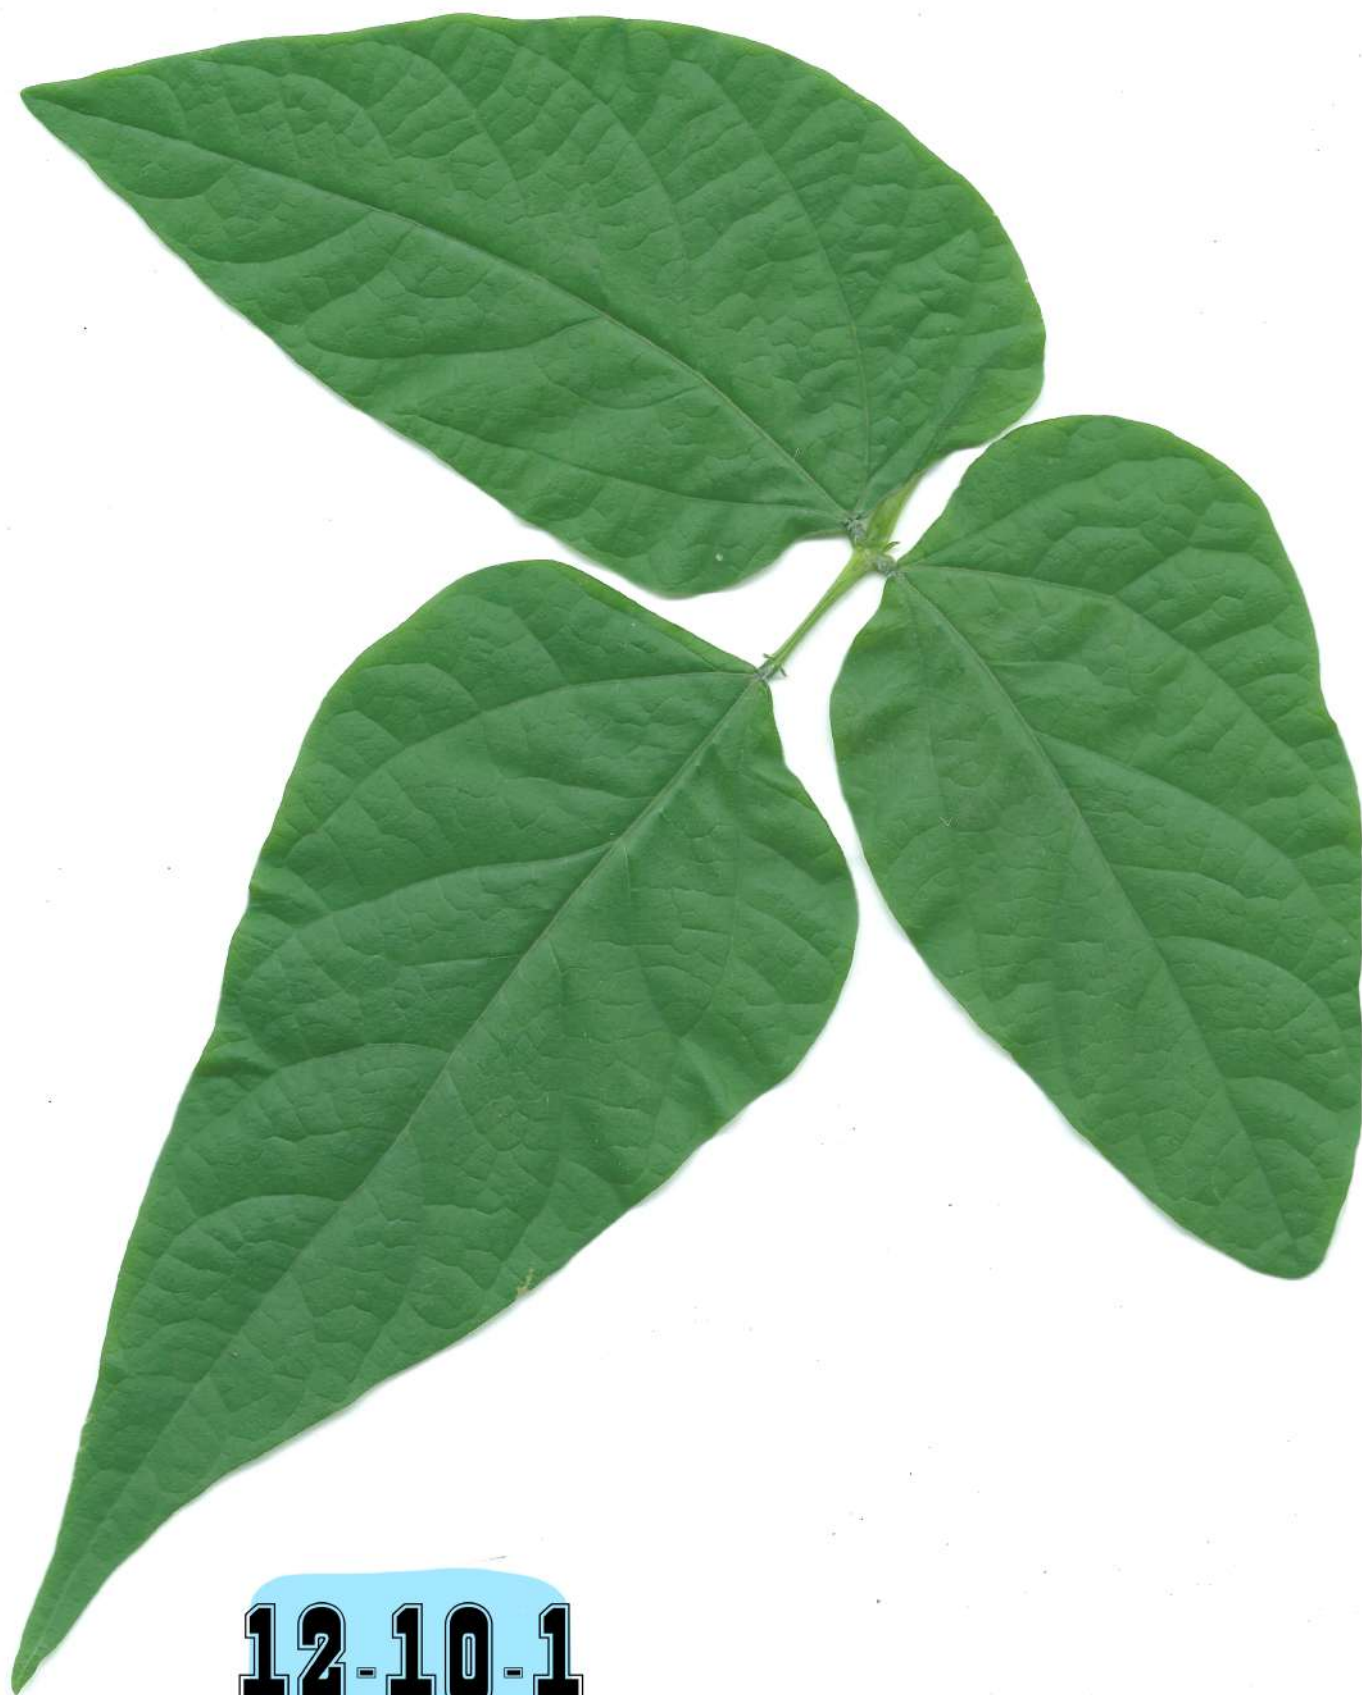

12-10-1

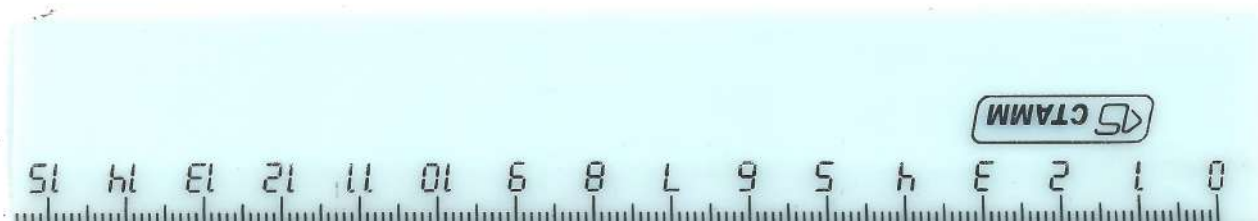

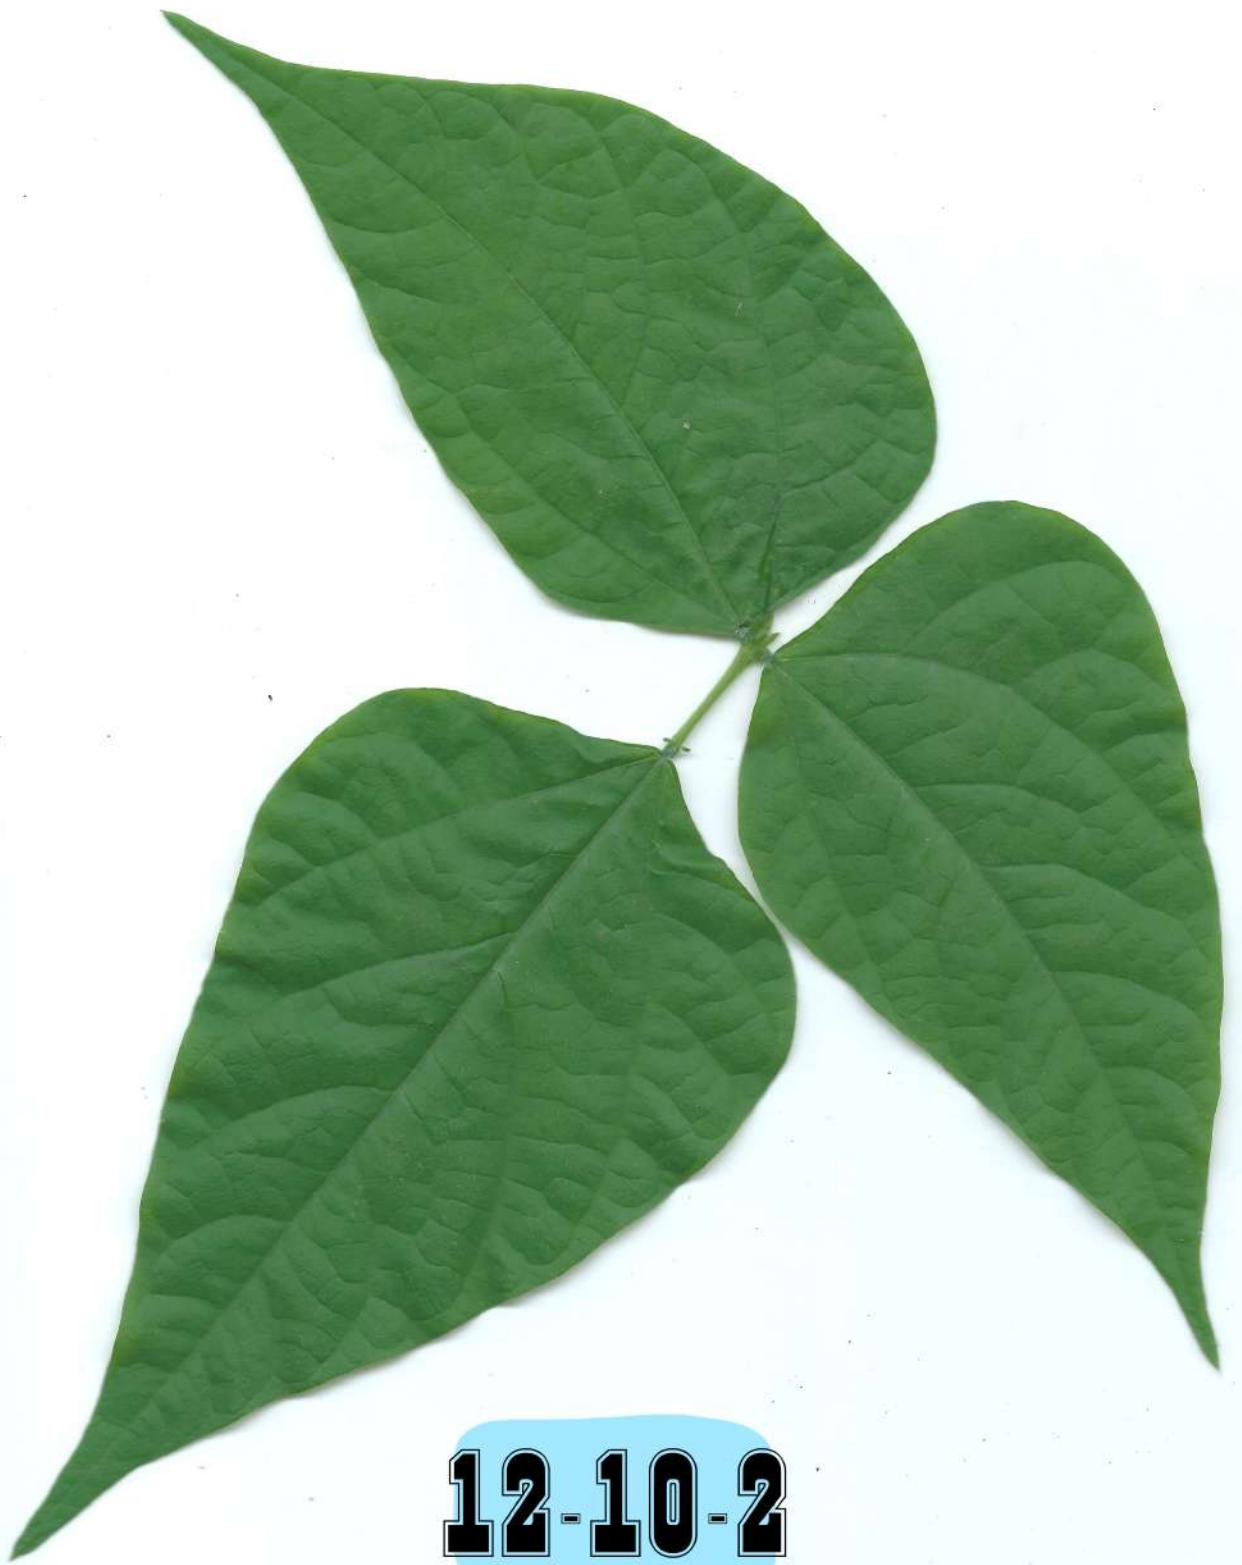

12-10-2

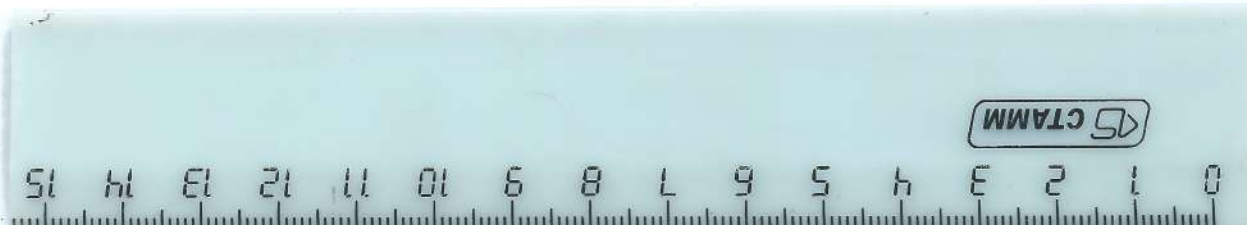

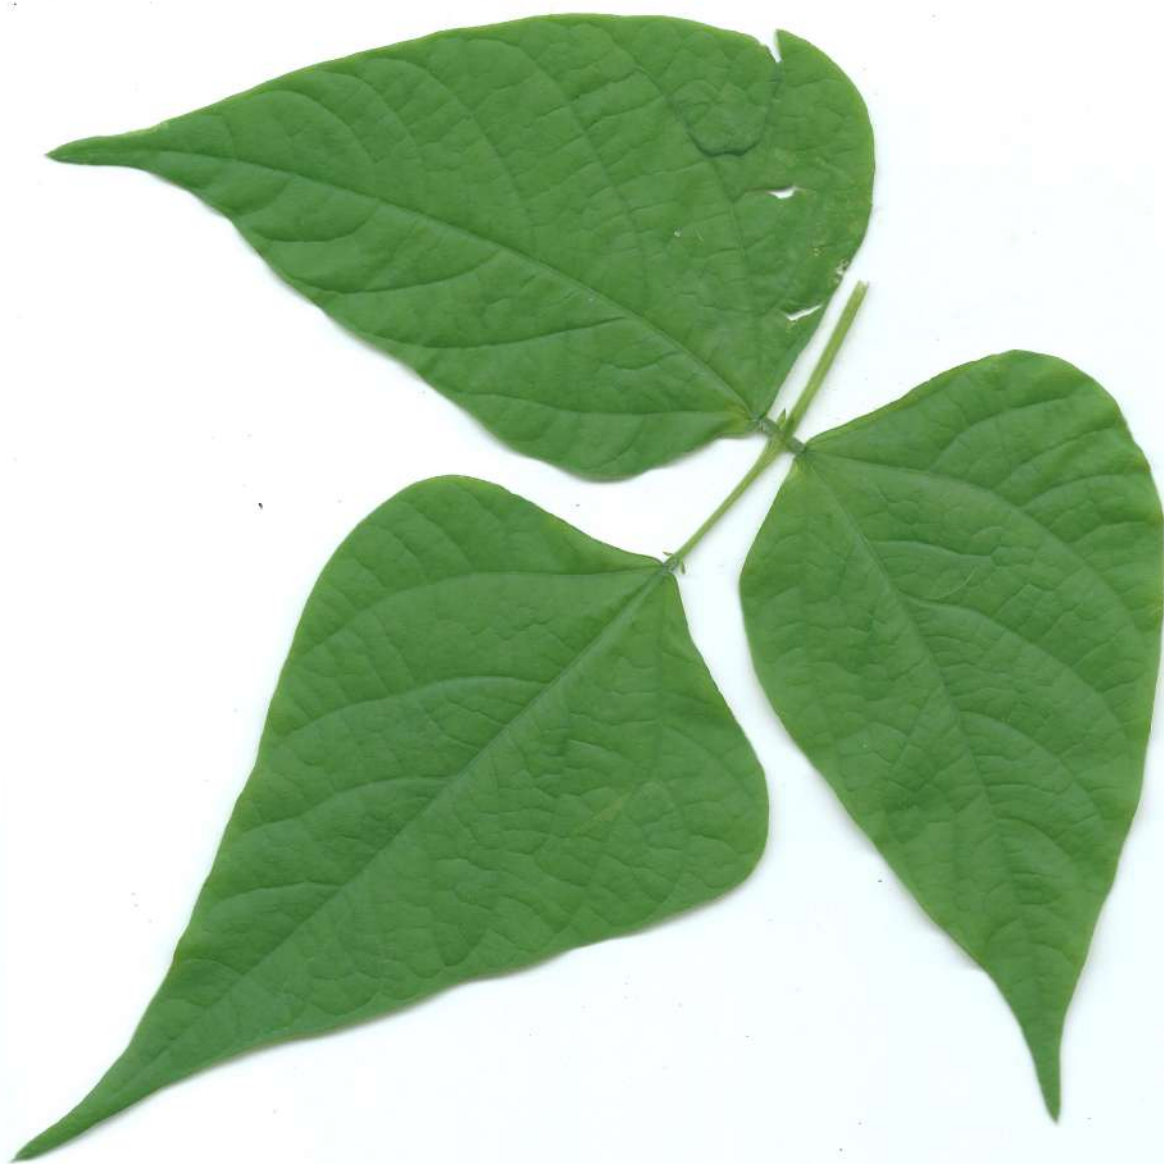

12-10-3

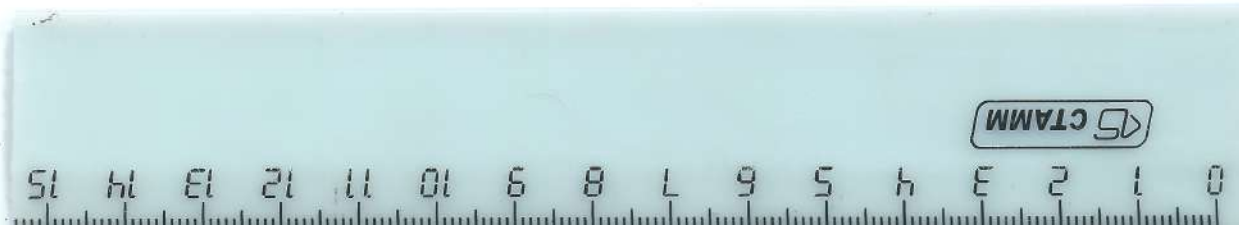



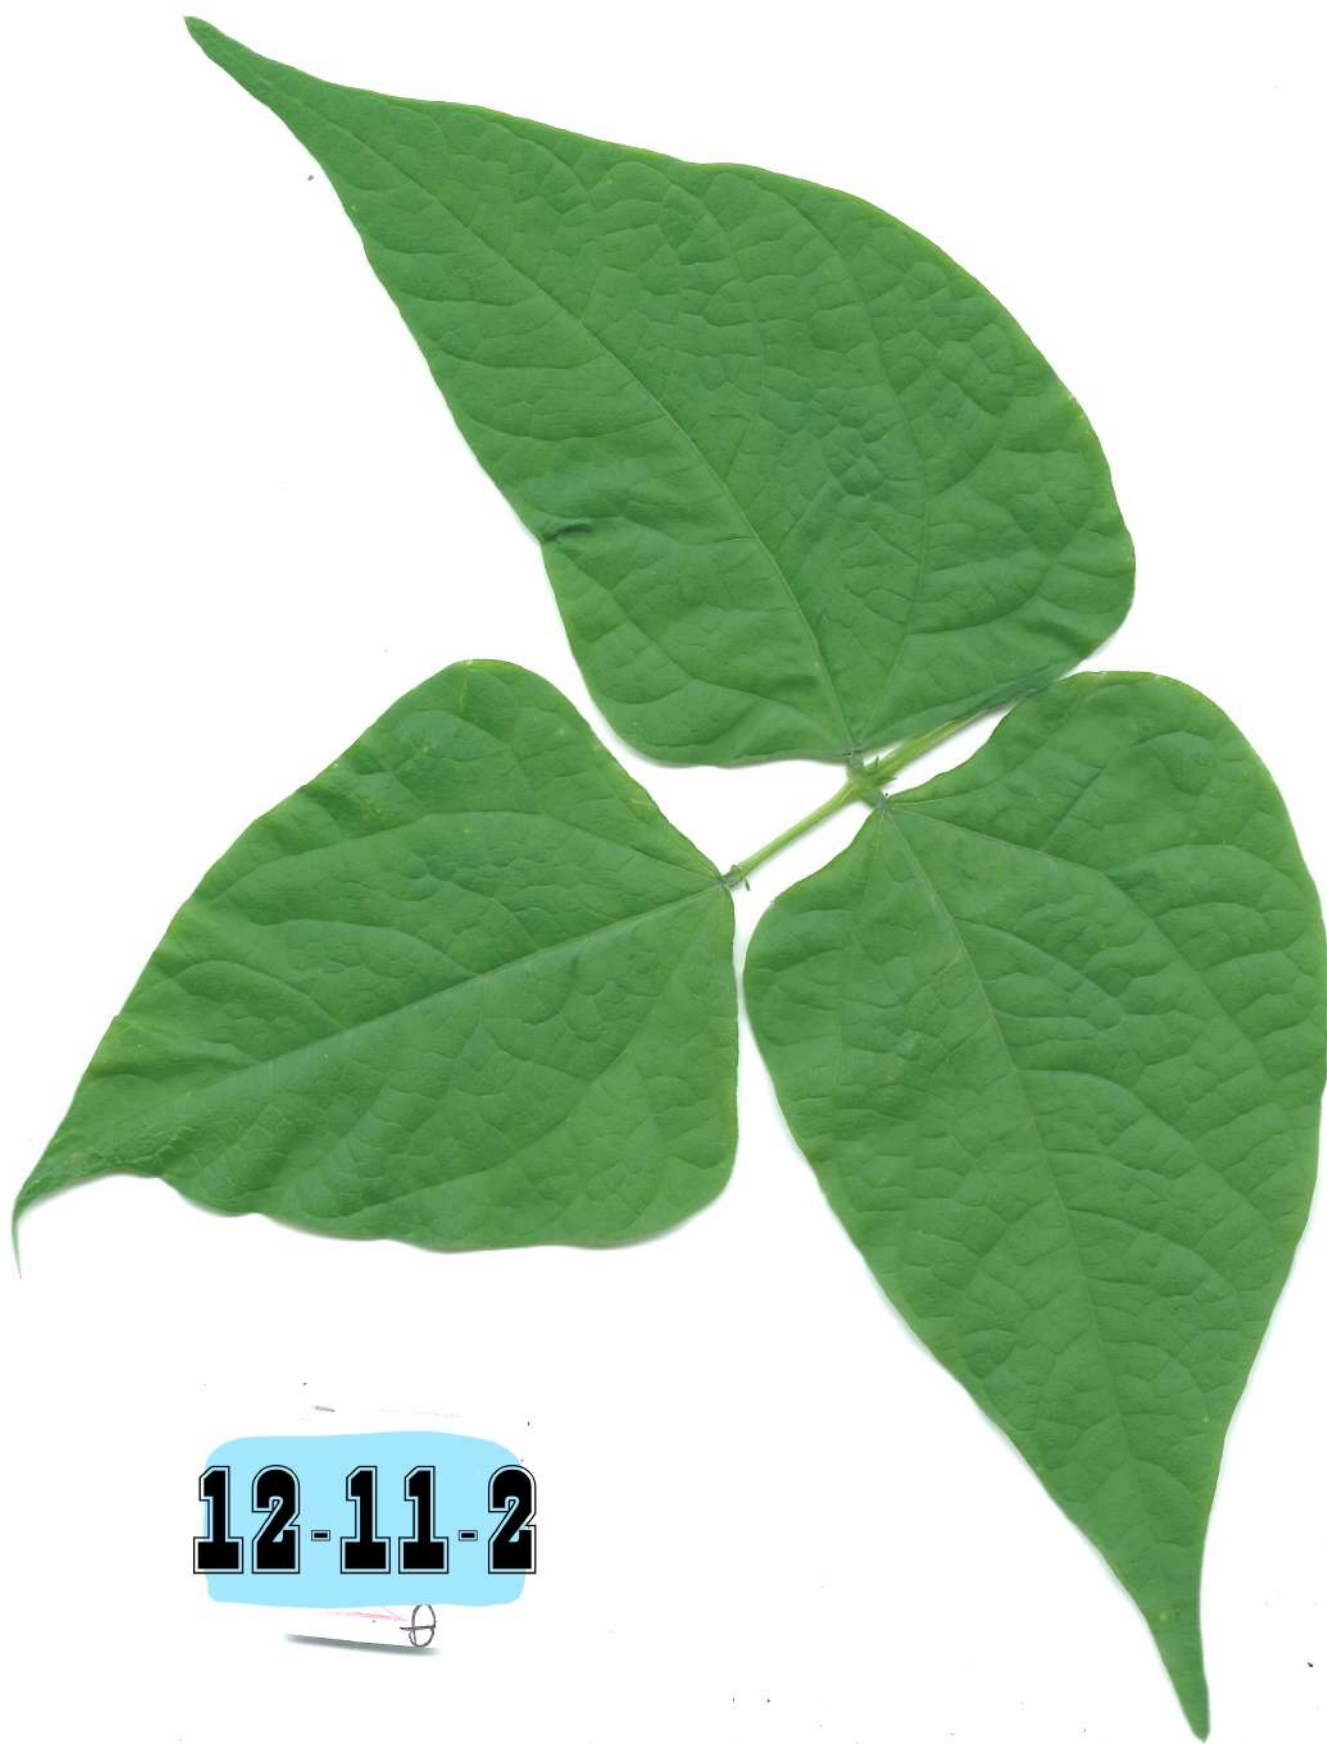

**12-11-2**

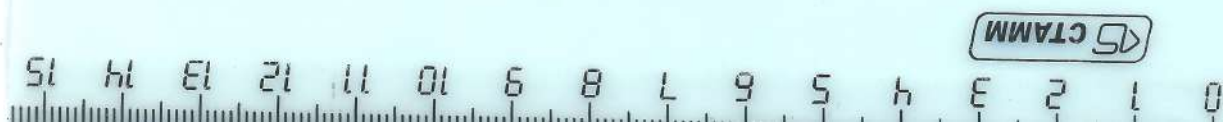



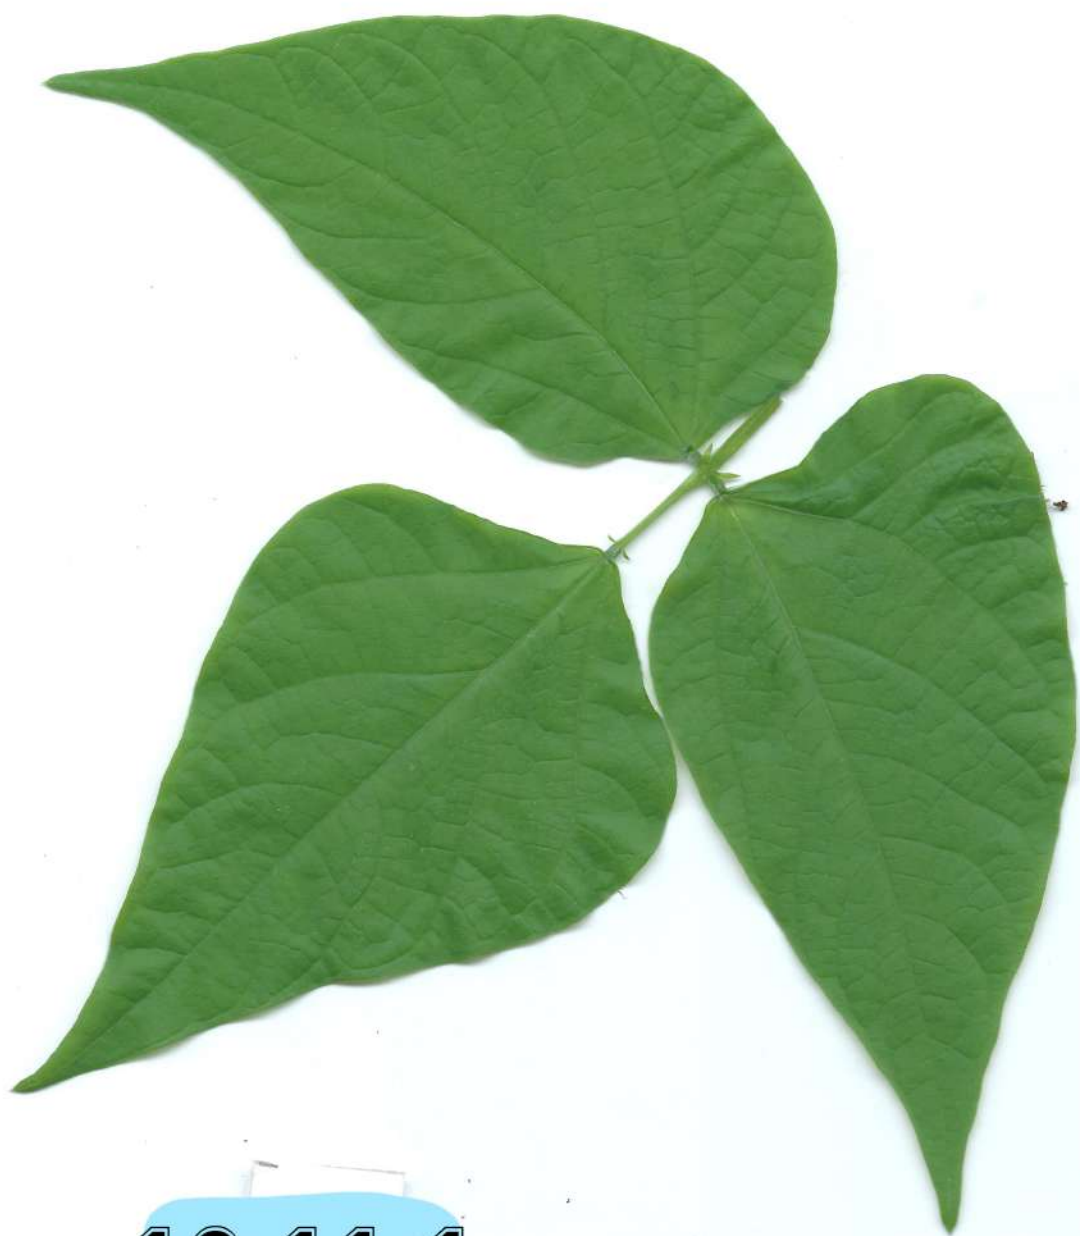

12-11-1

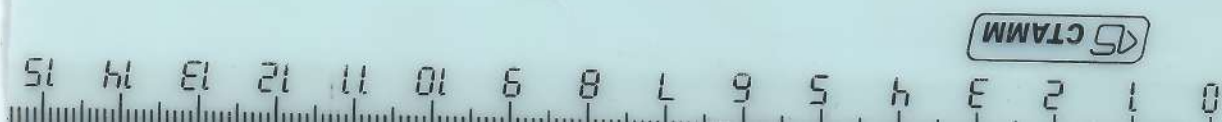

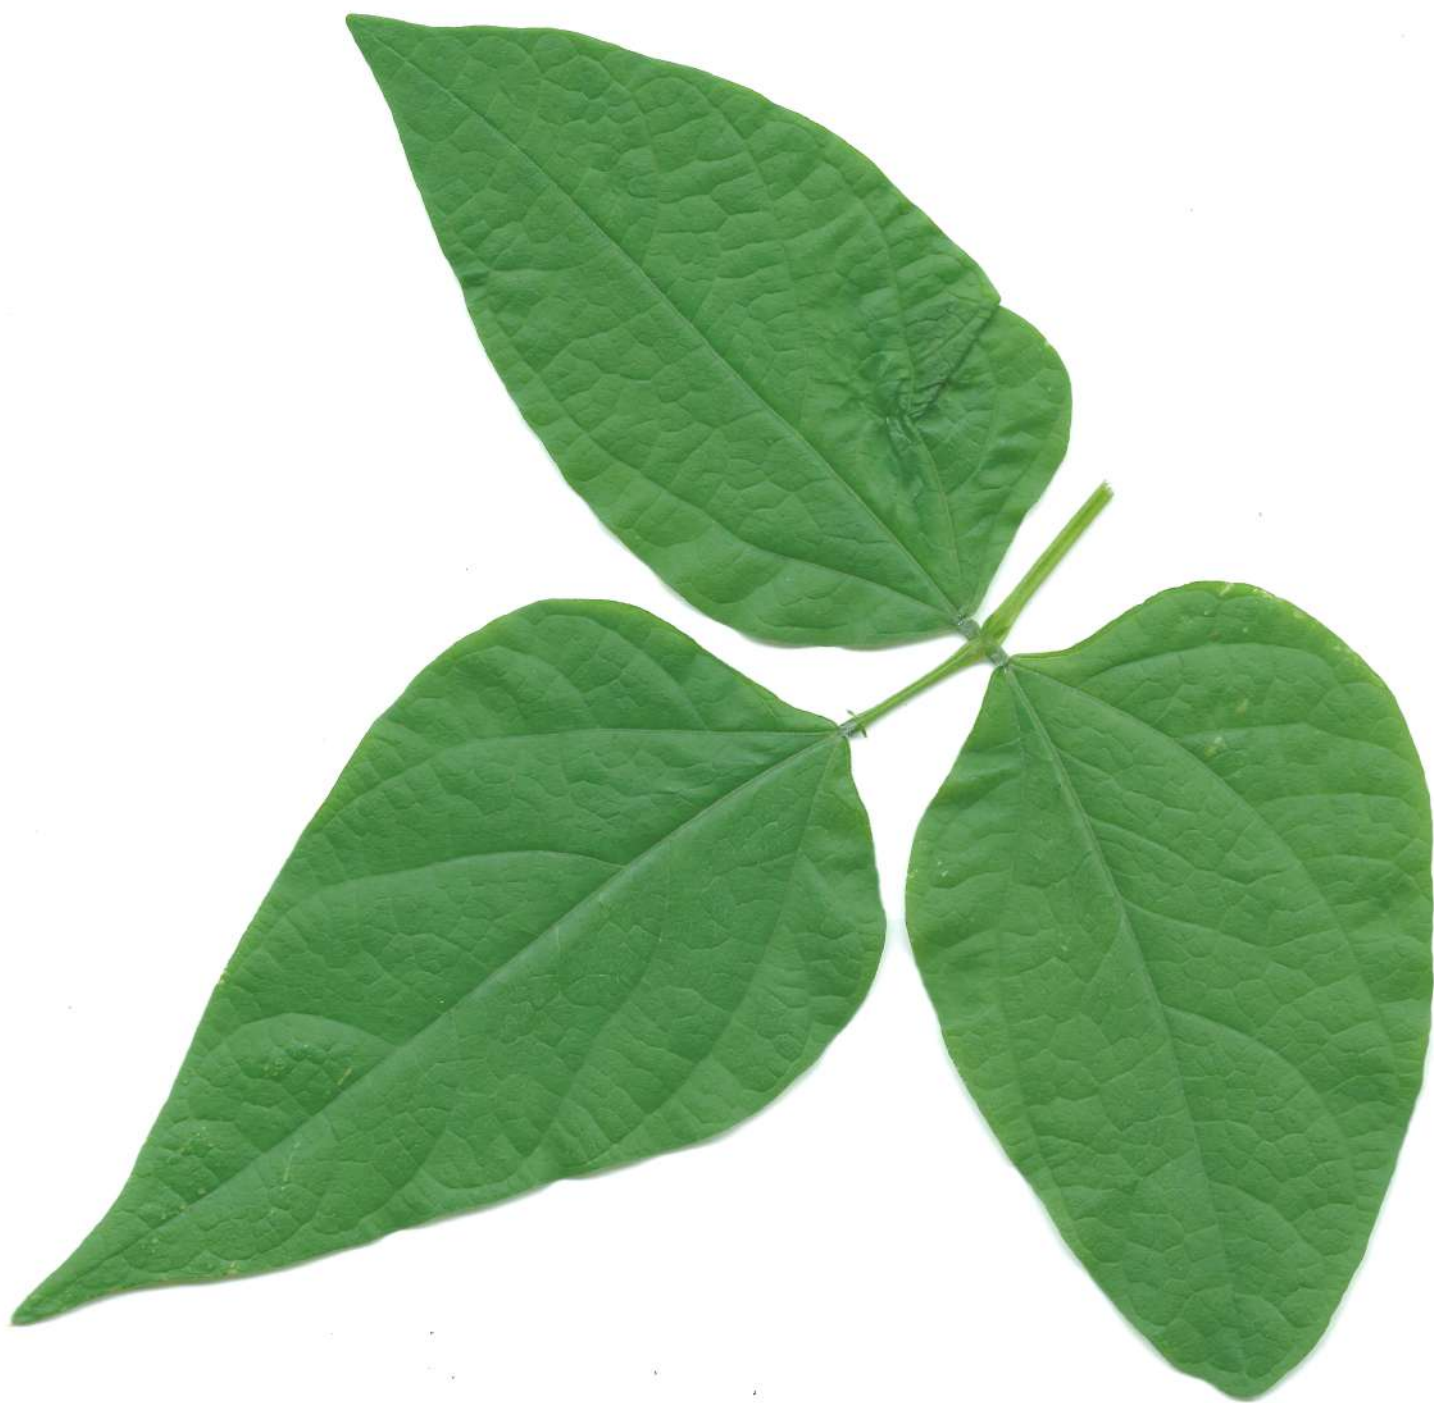

**12-12-3**

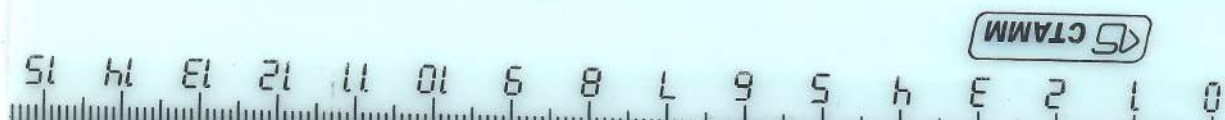

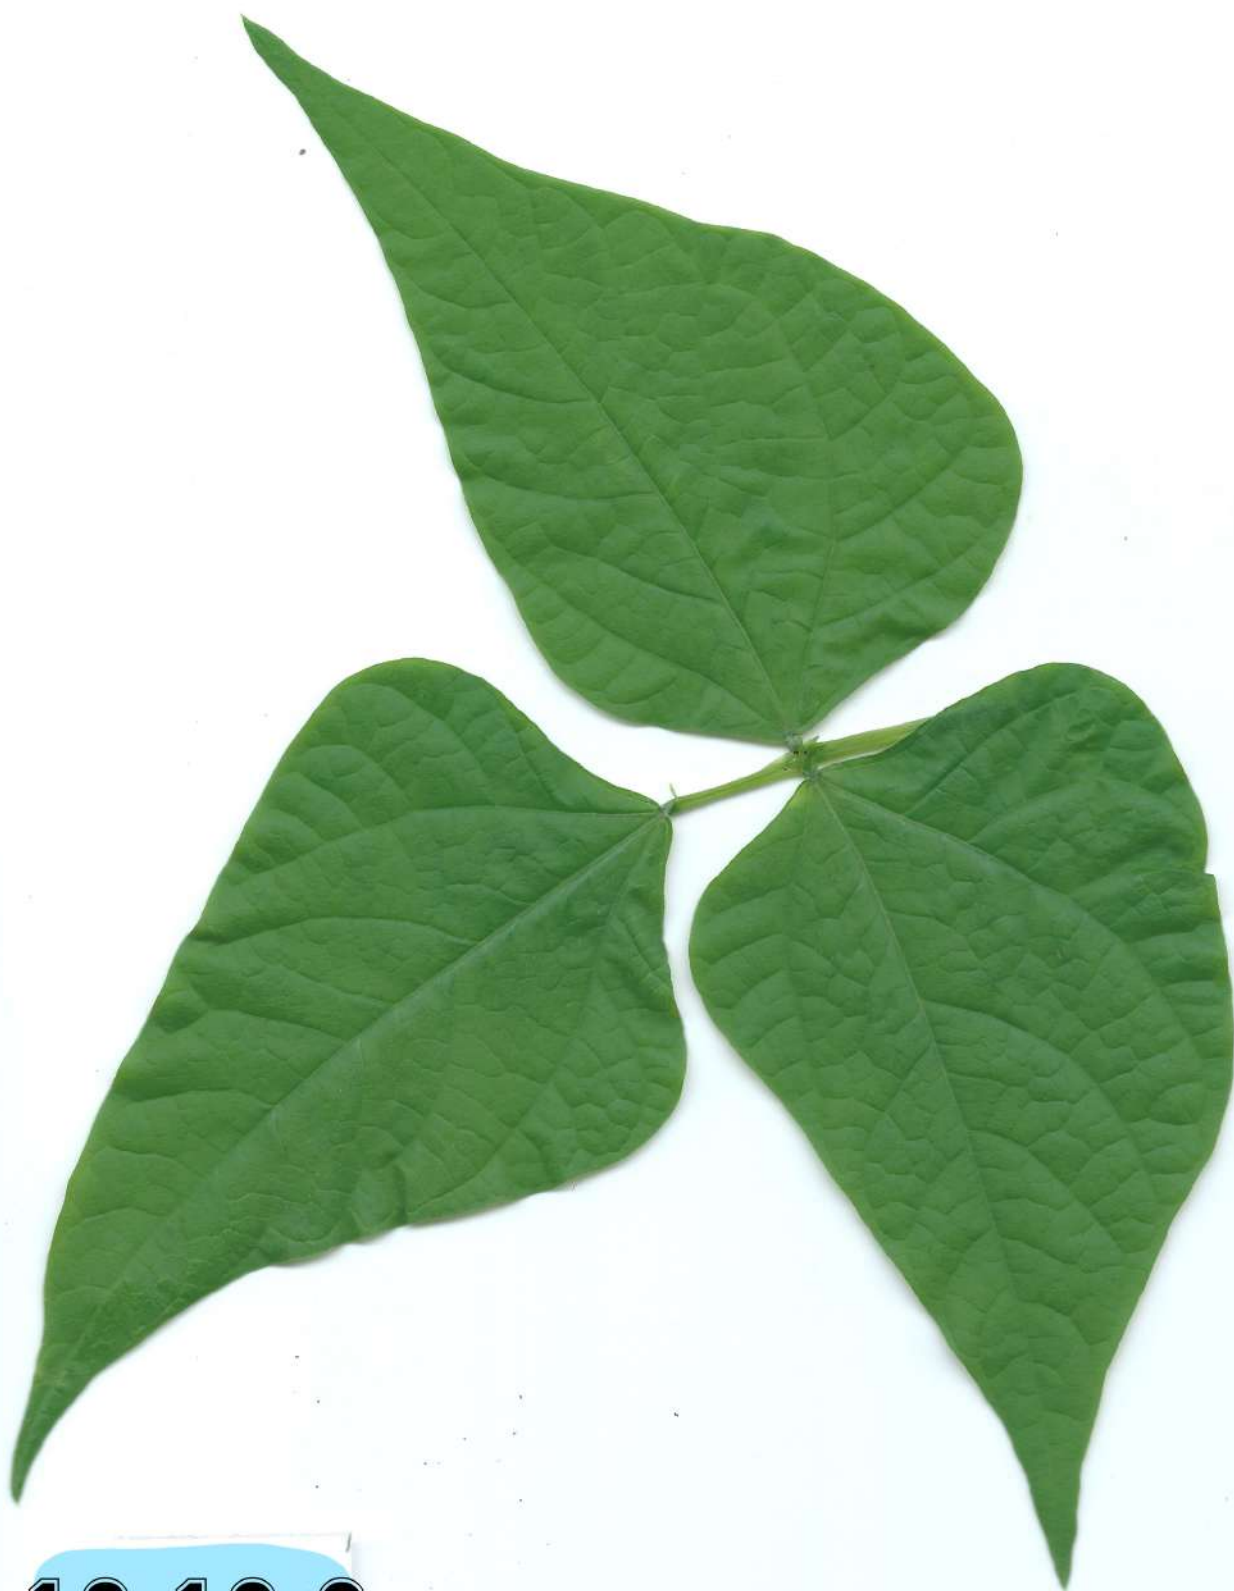

**12-12-2**

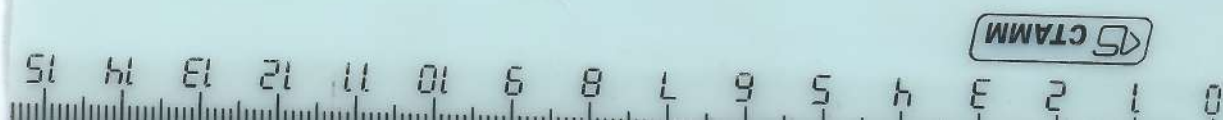

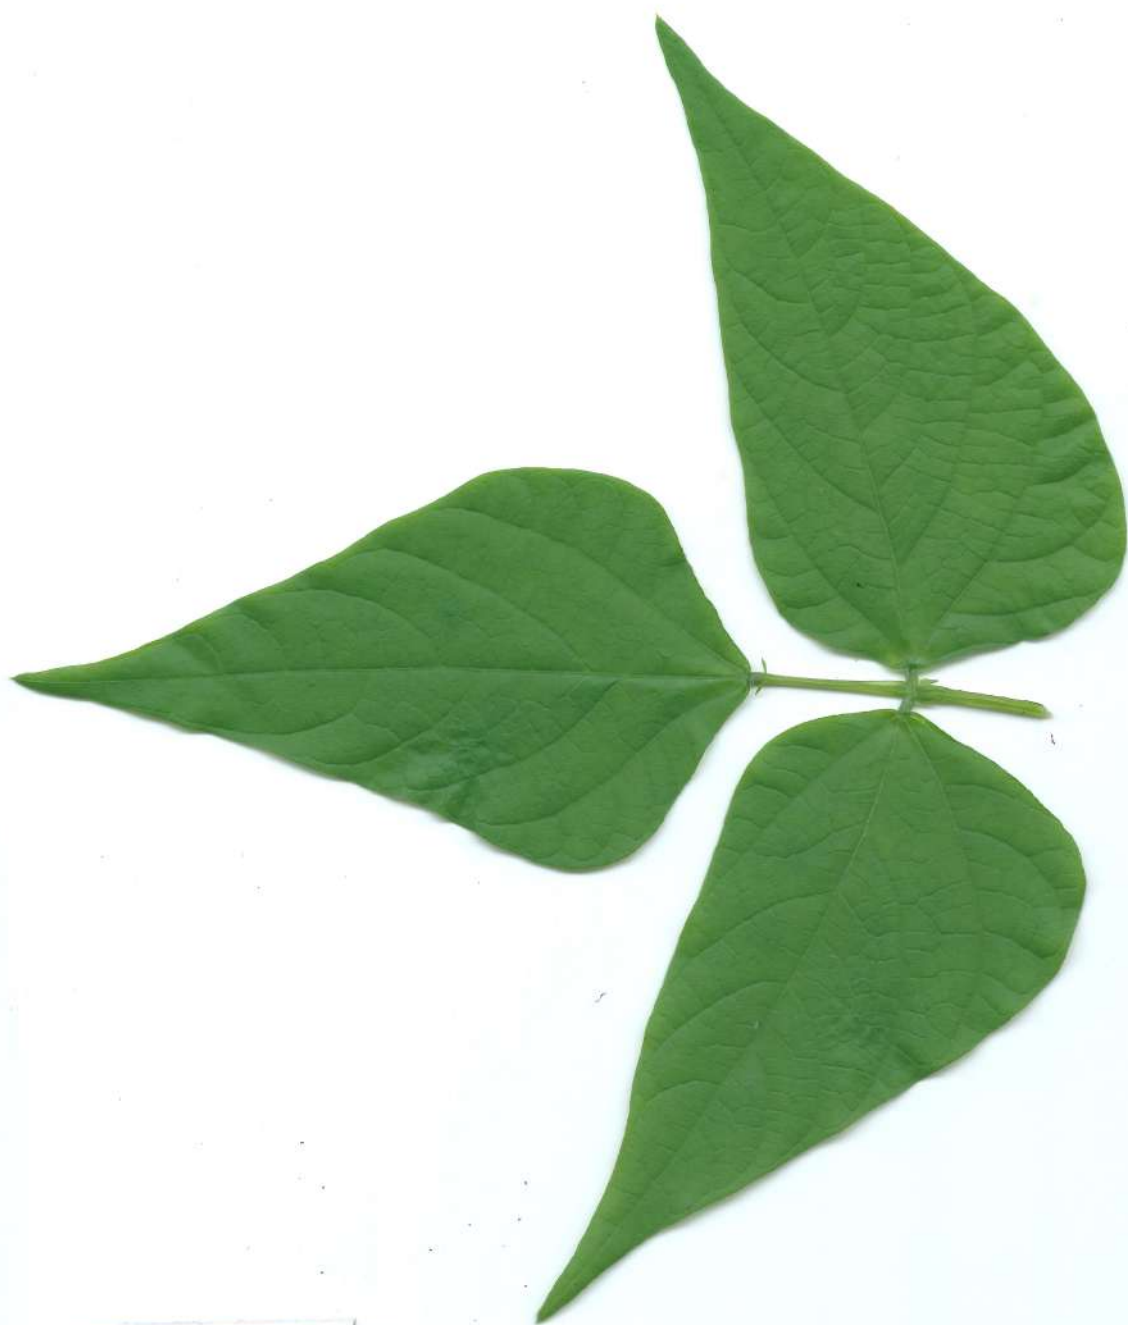

**12-12-1**

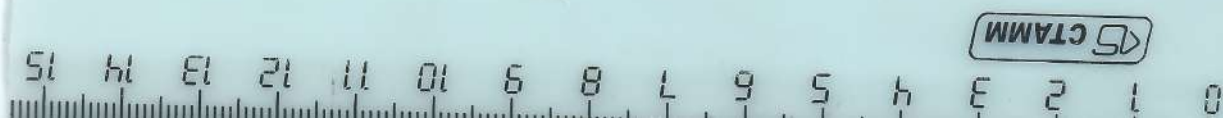



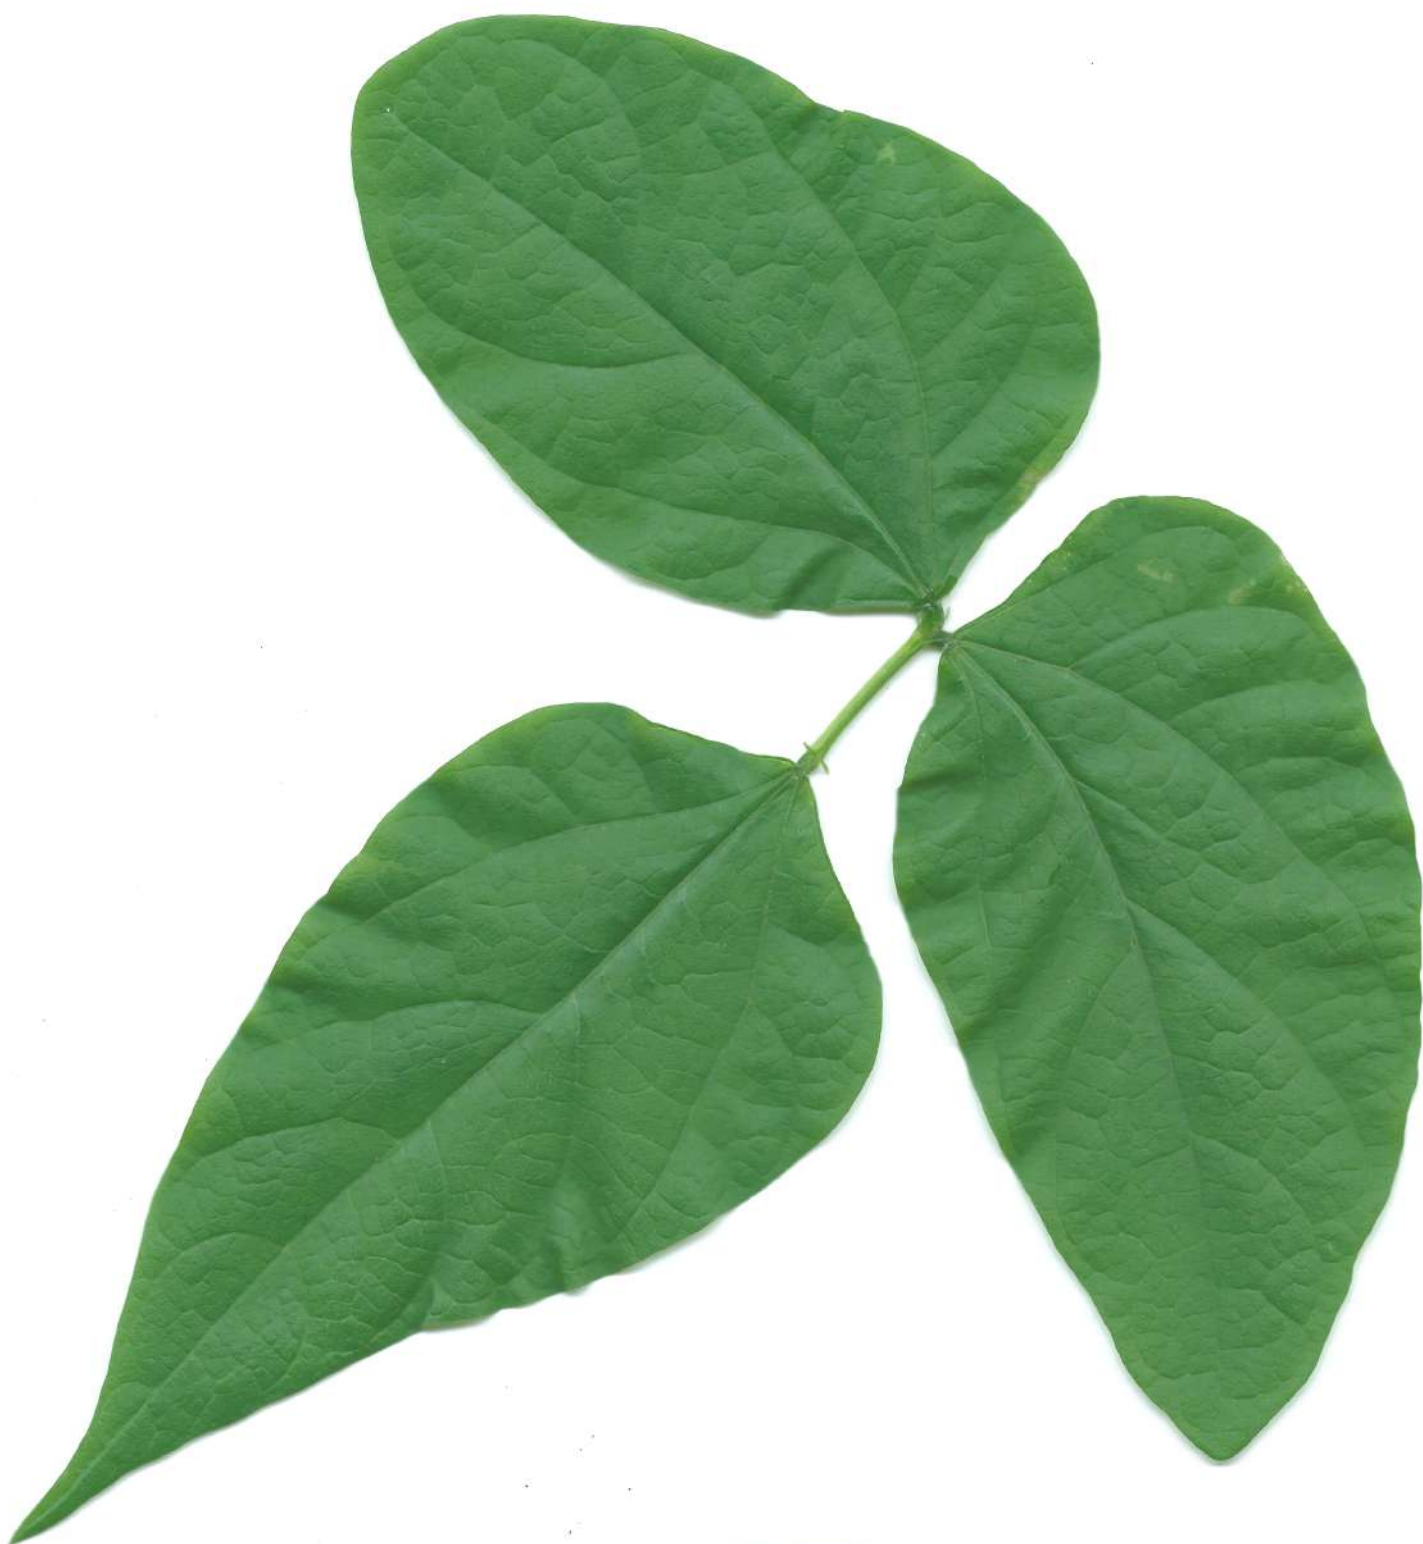

**12-13-3**

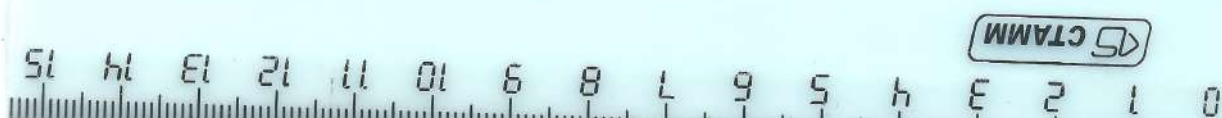

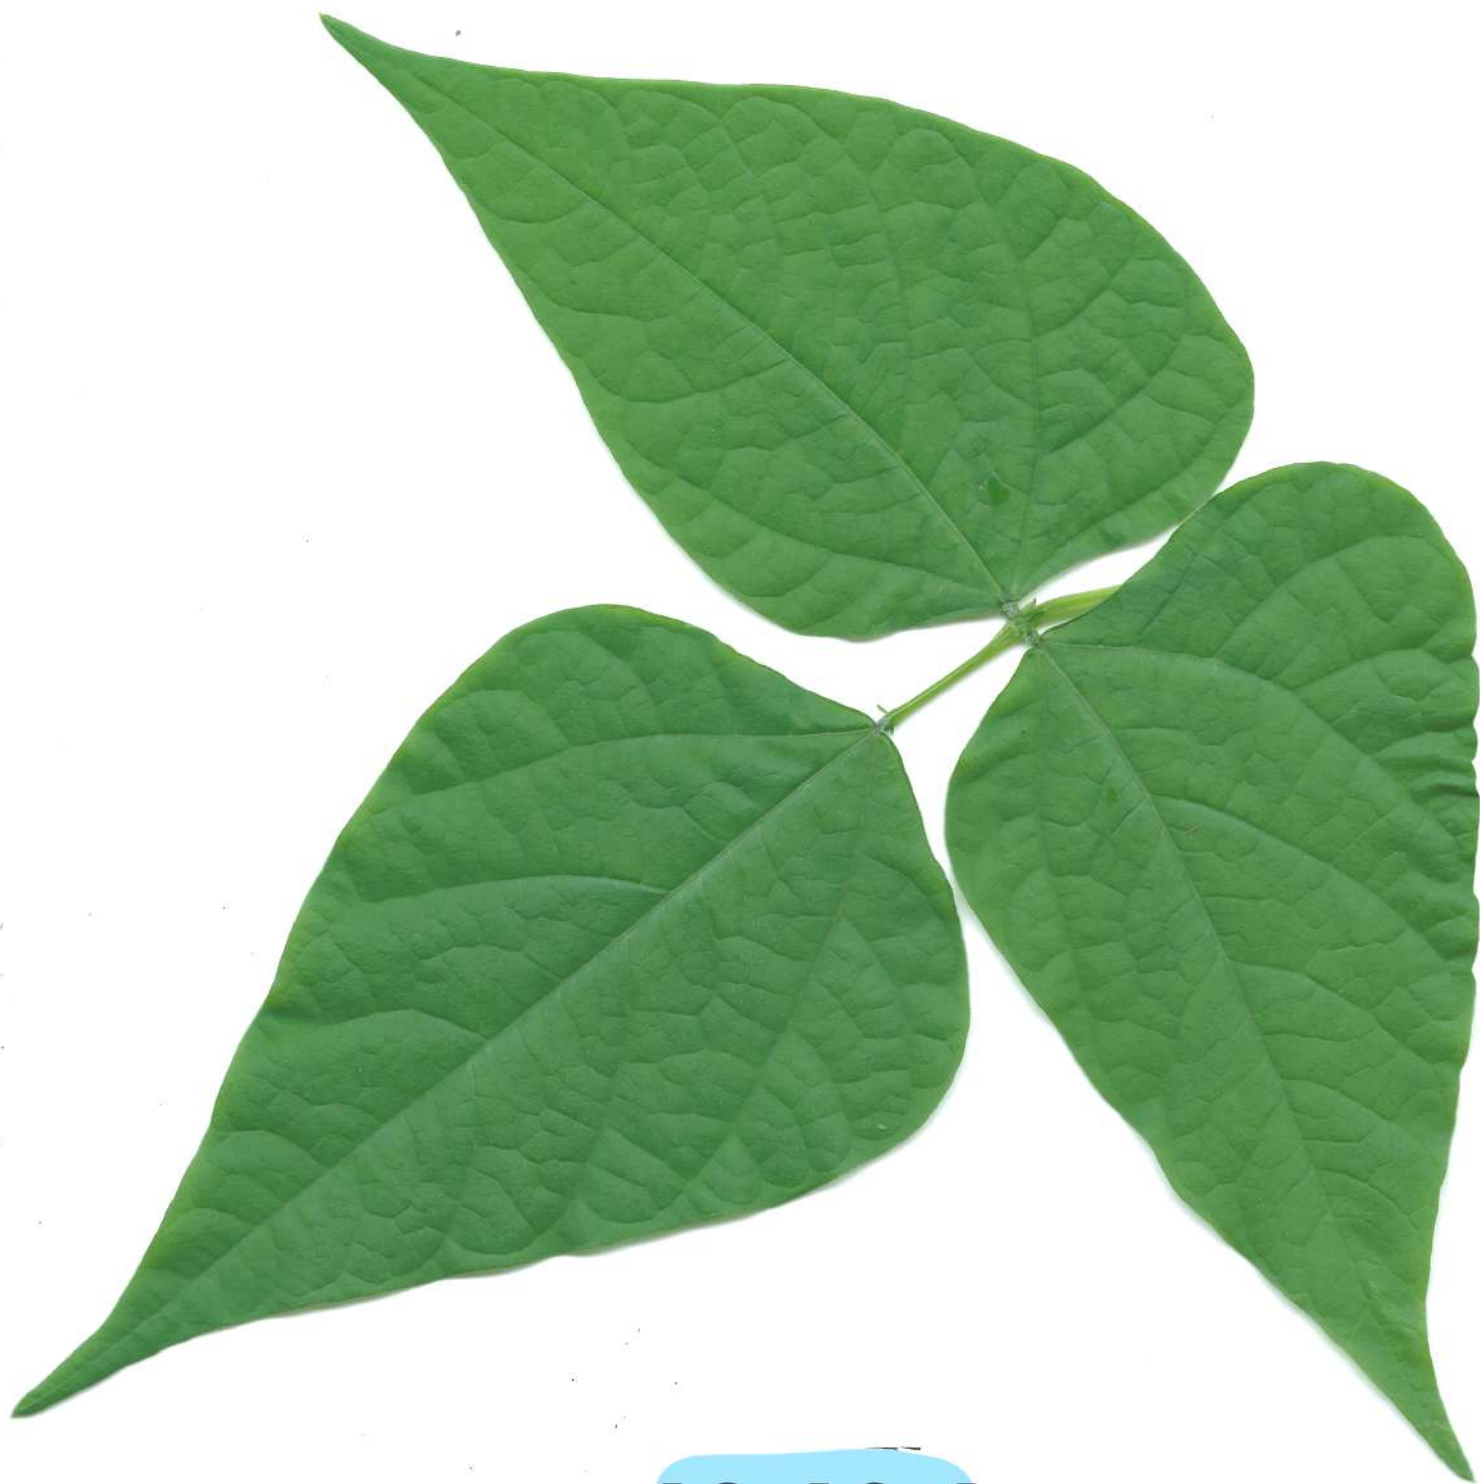

**12-13-1**

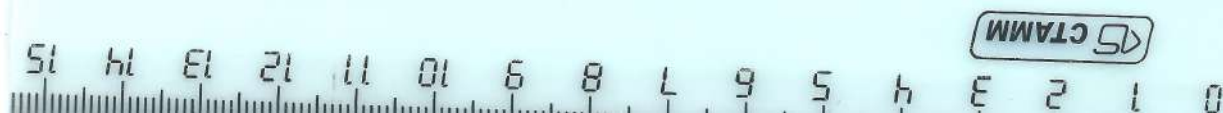

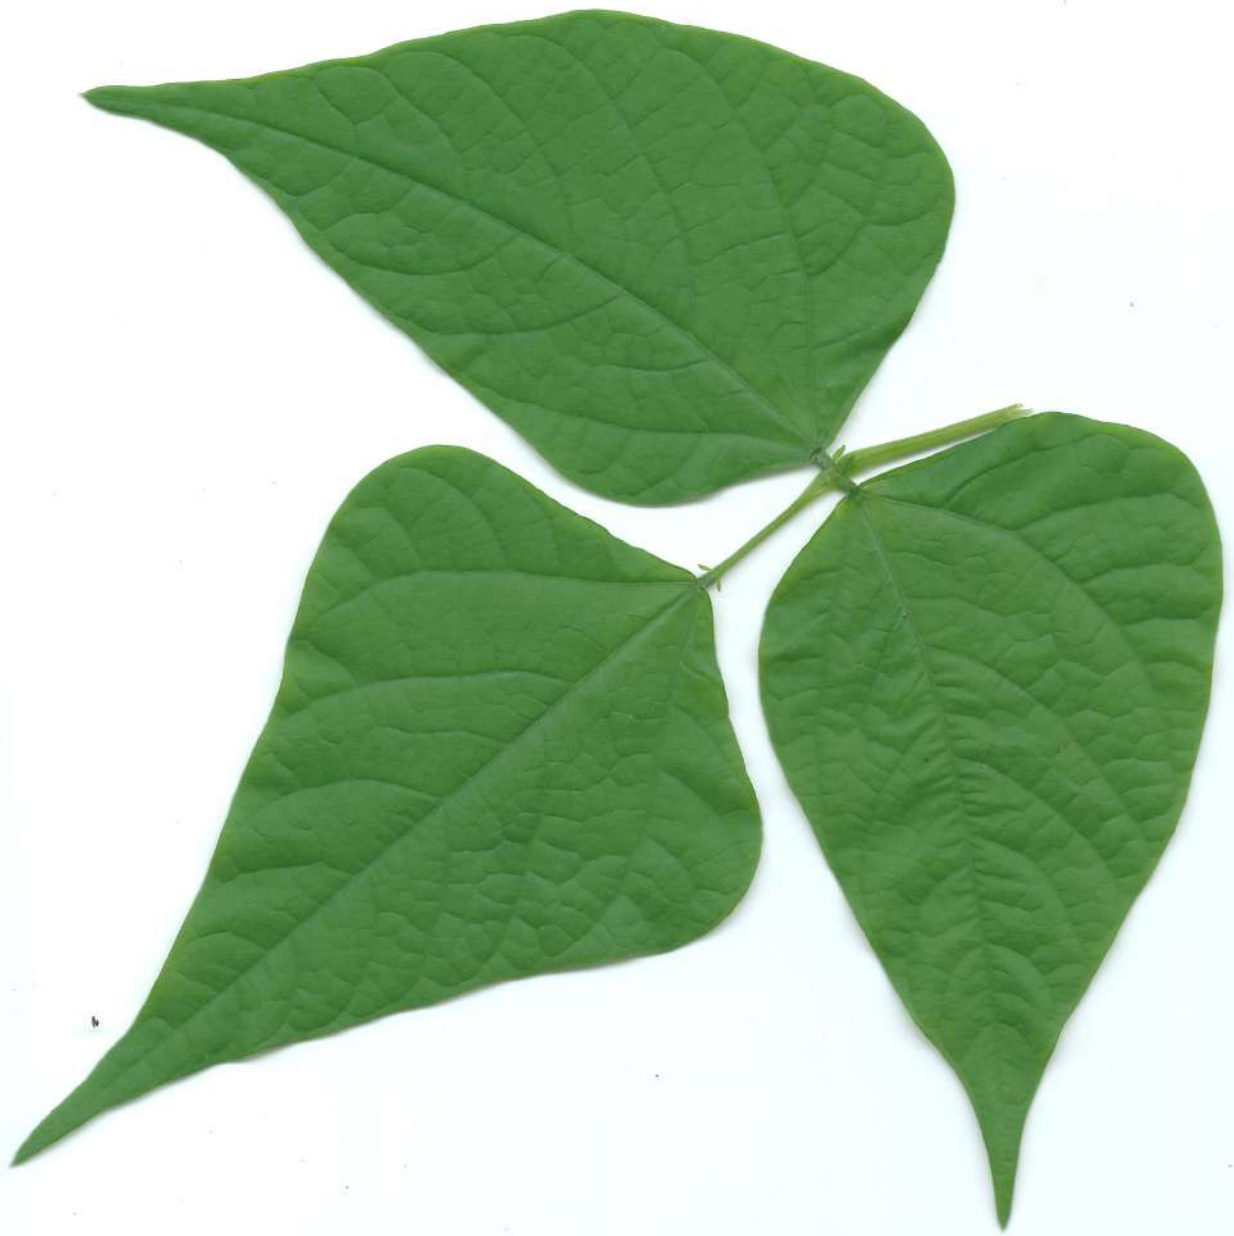

**12-13-2**

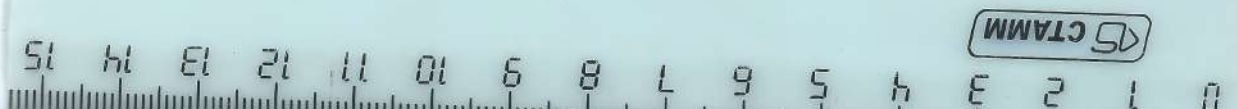



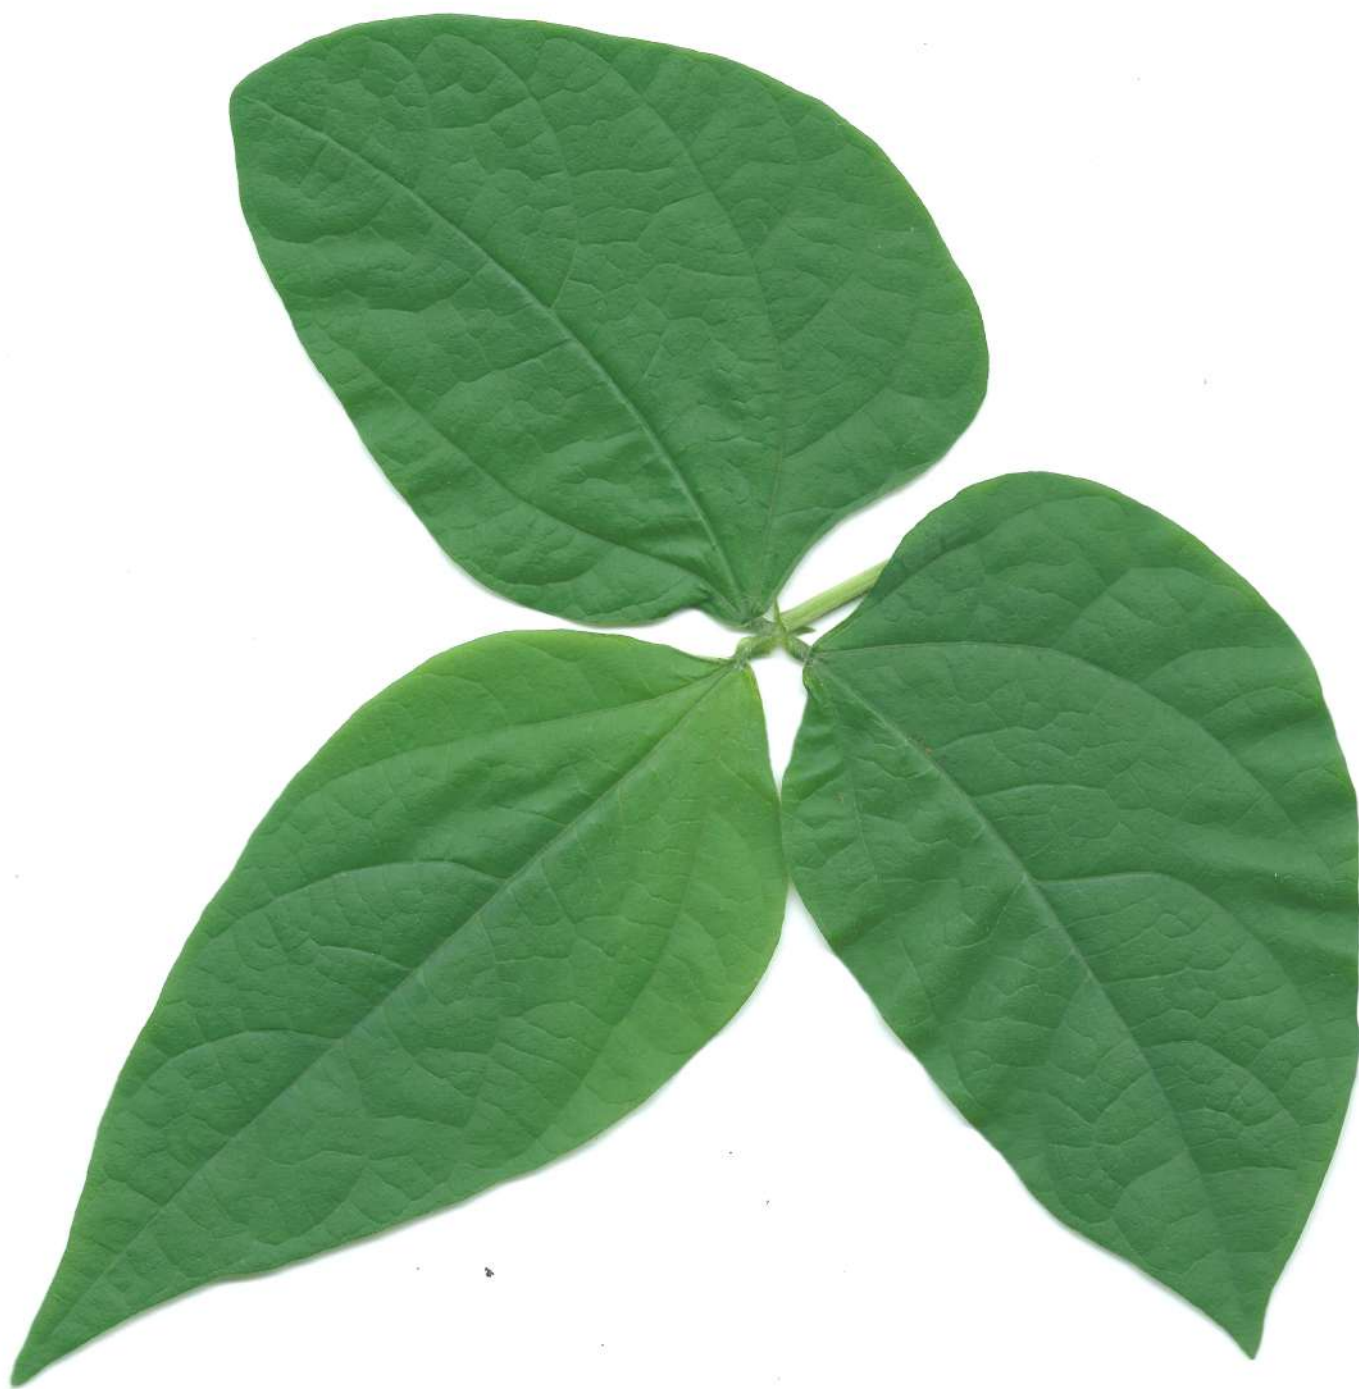

**12-14-1**

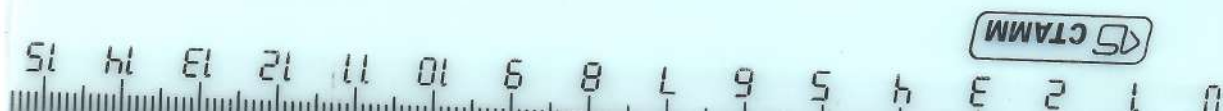



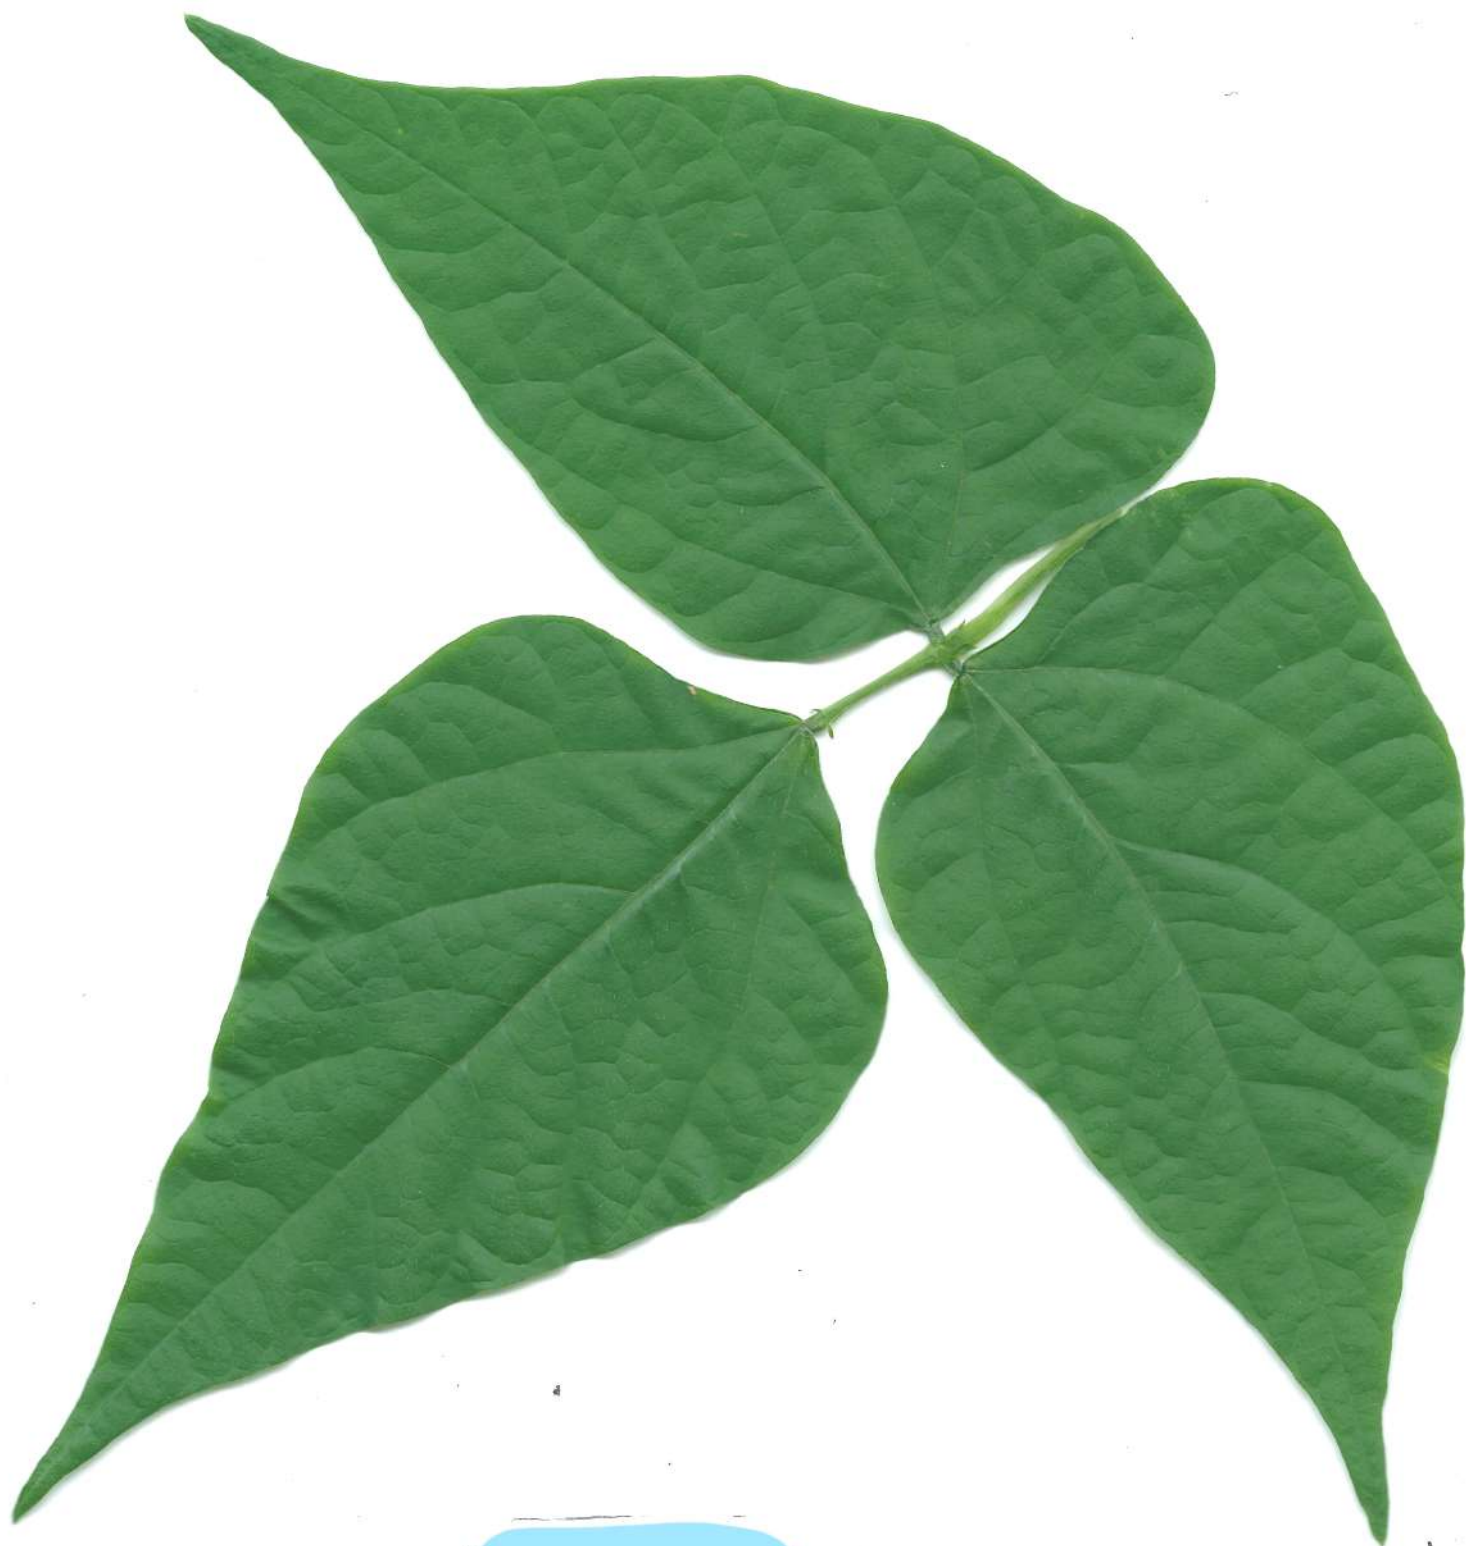

**12-14-2**

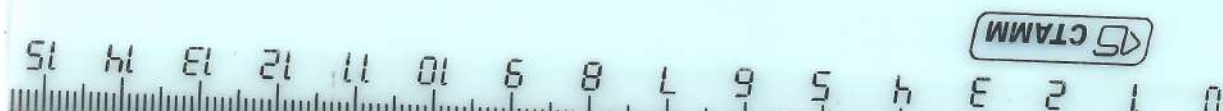

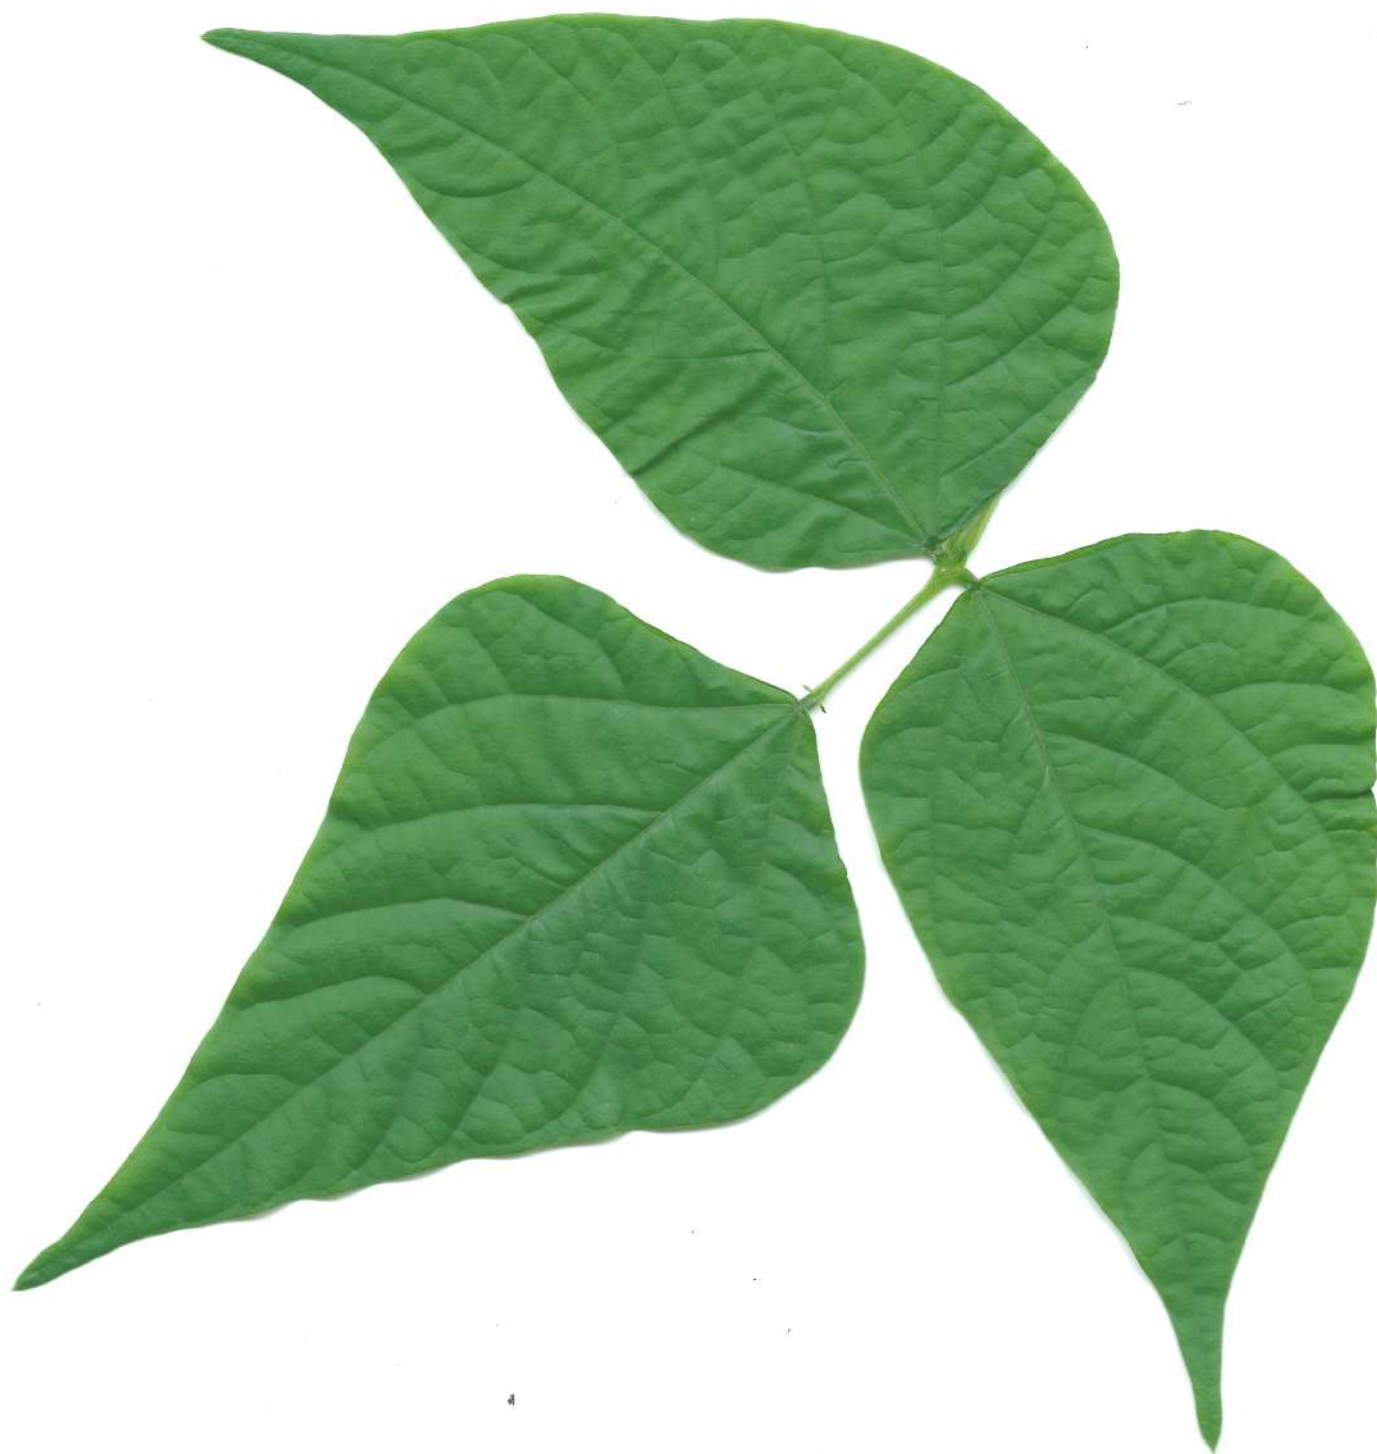

**12-14-3**

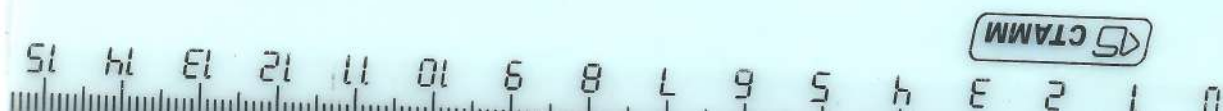

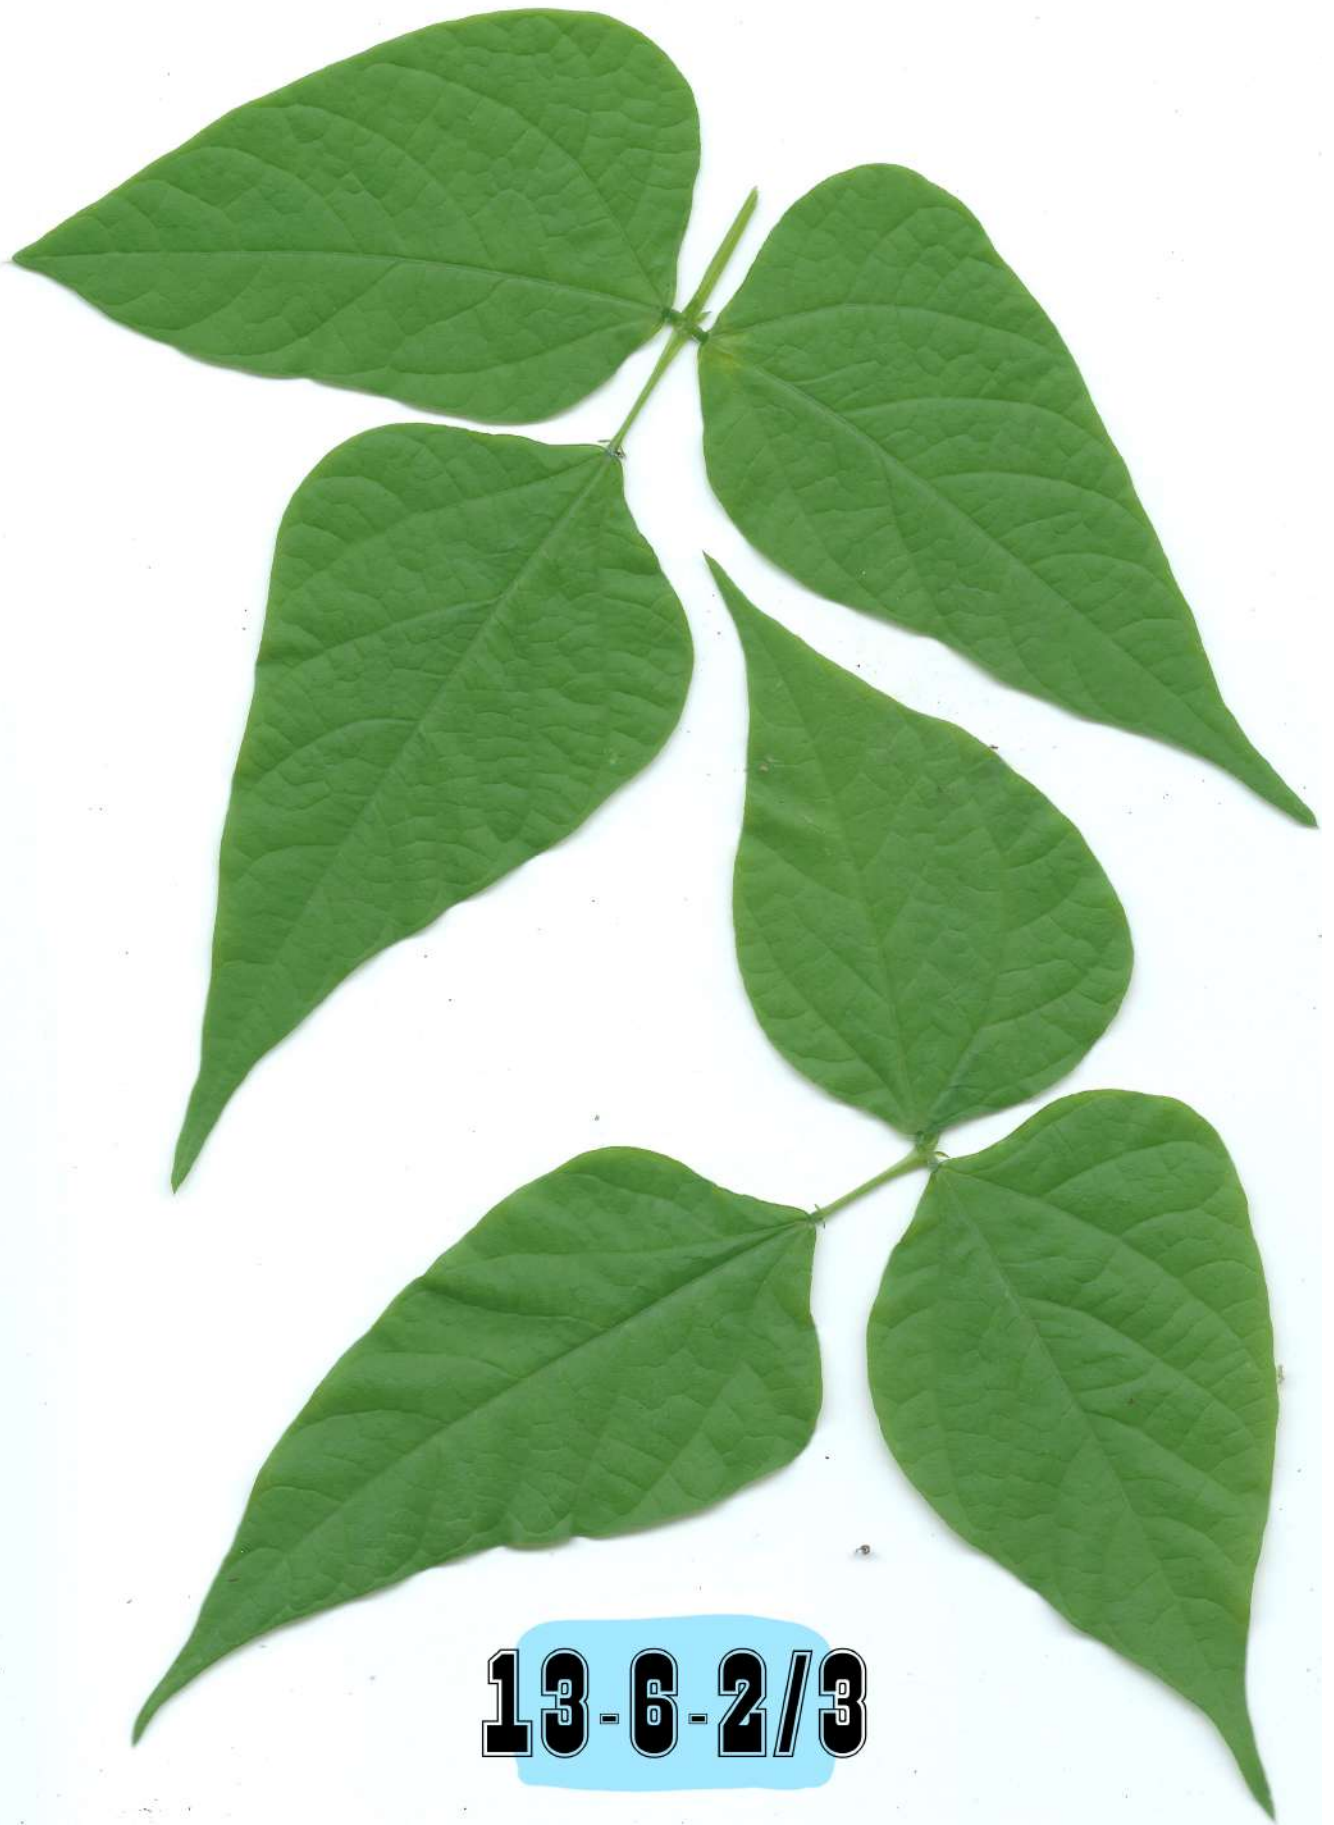

13-6-2/3

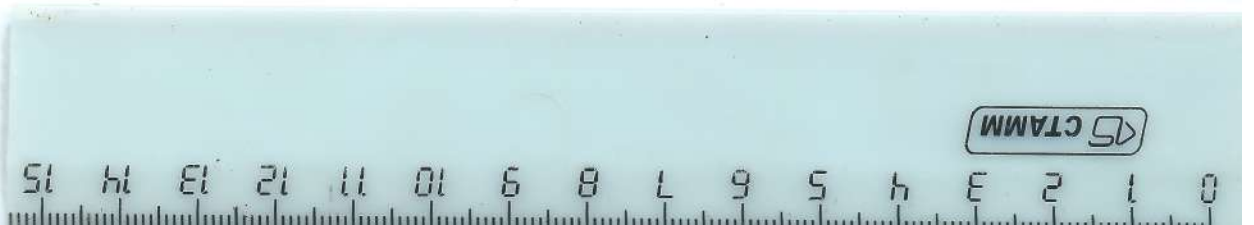



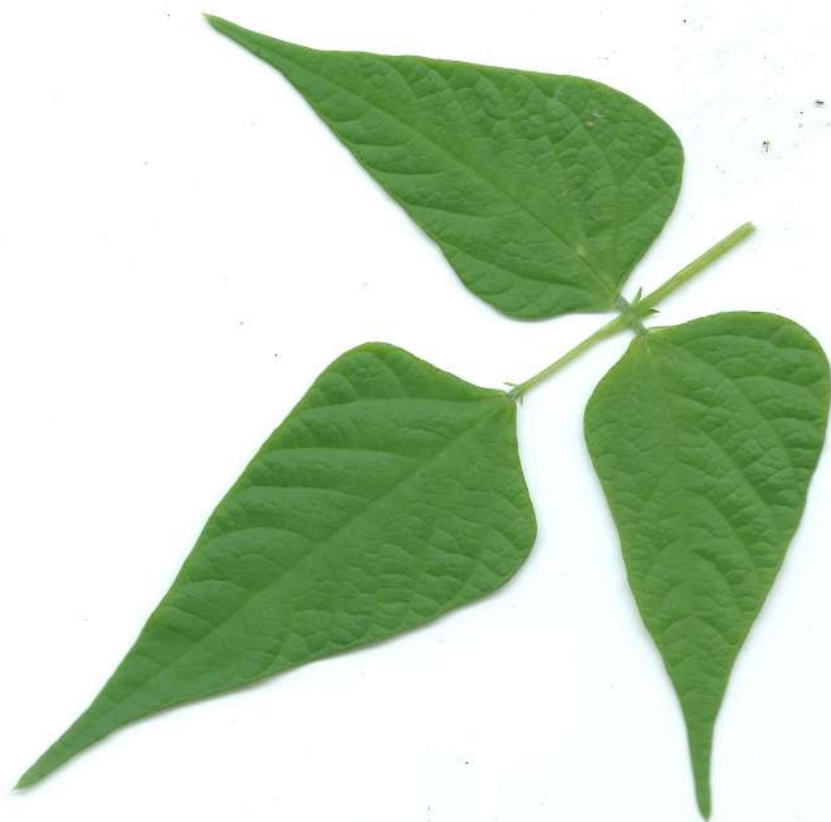

**13-6-1**

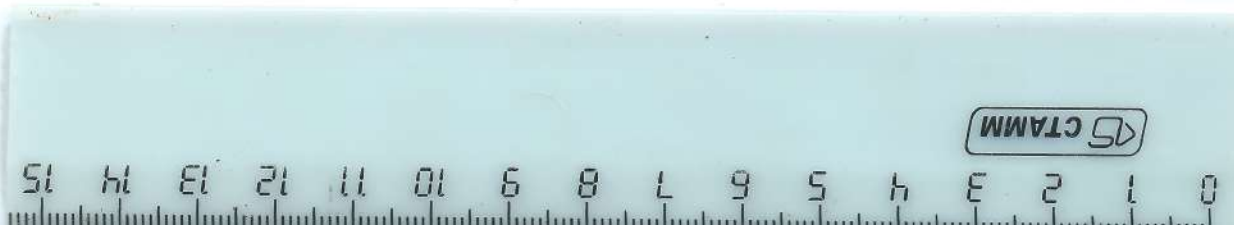



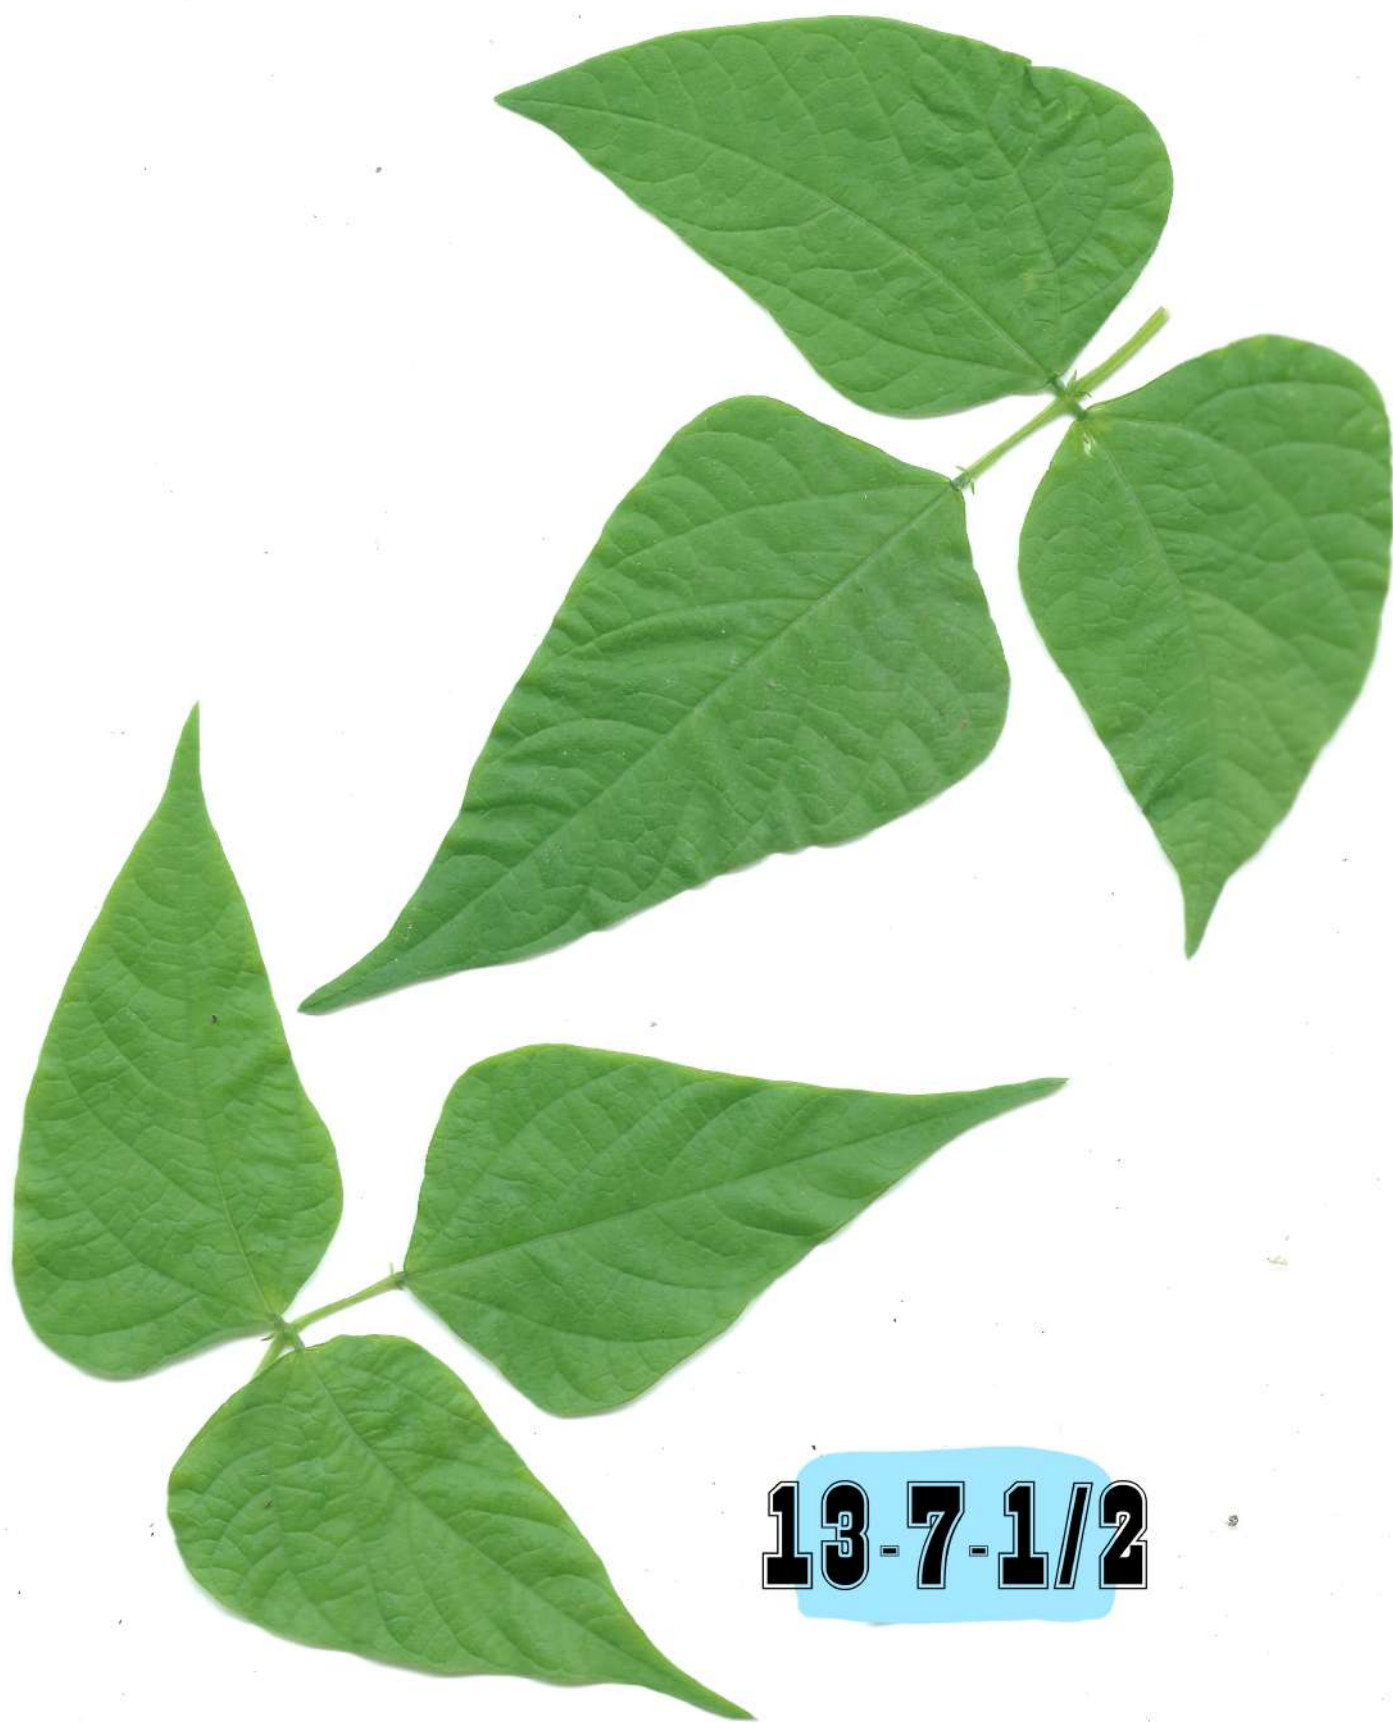

**13-7-1/2**

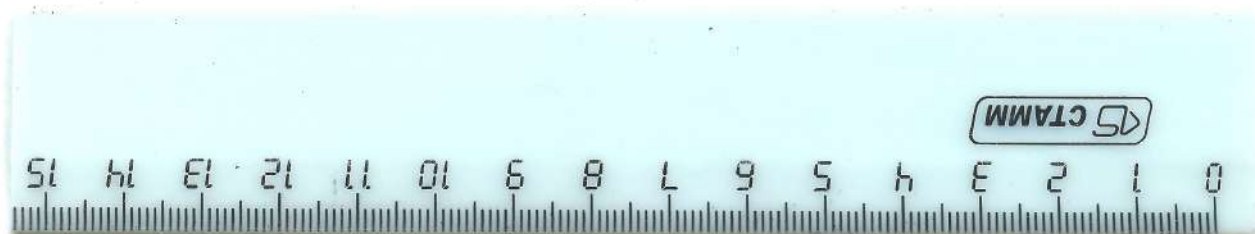

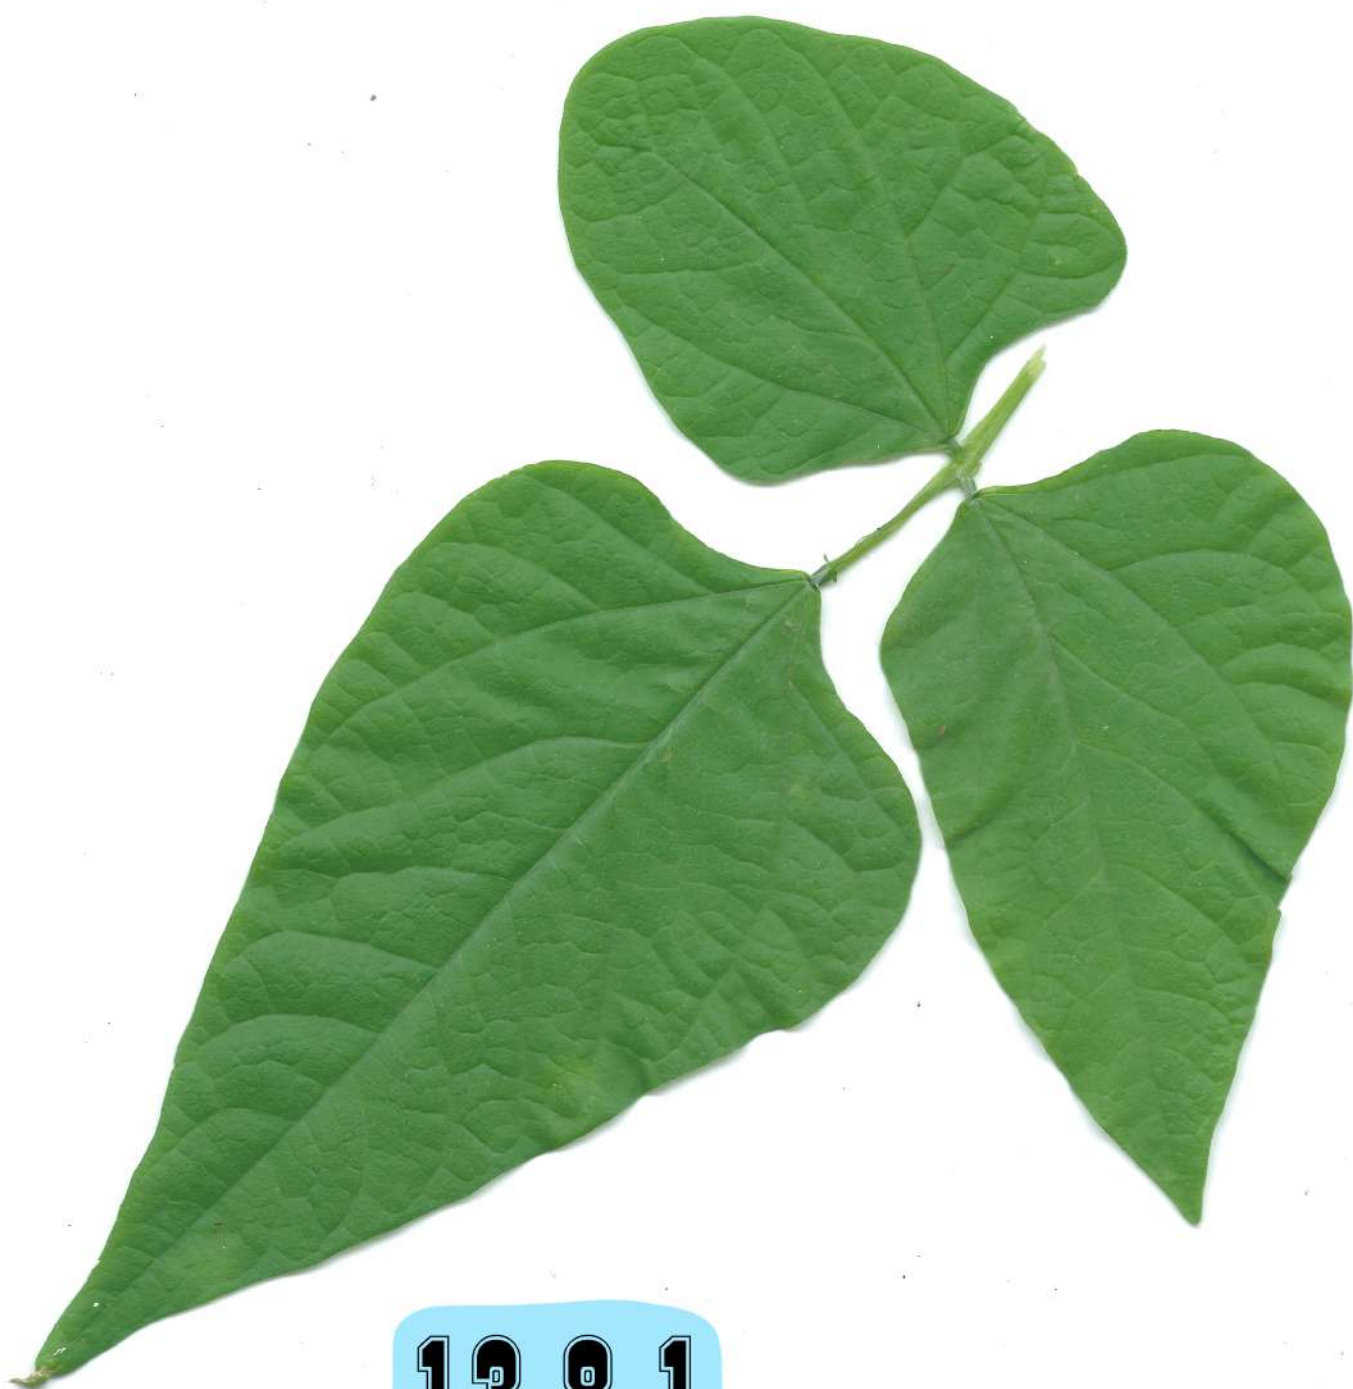

**13-8-1**

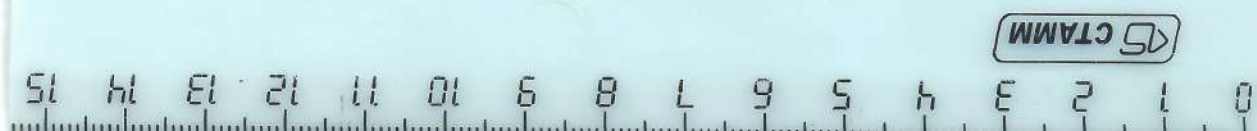

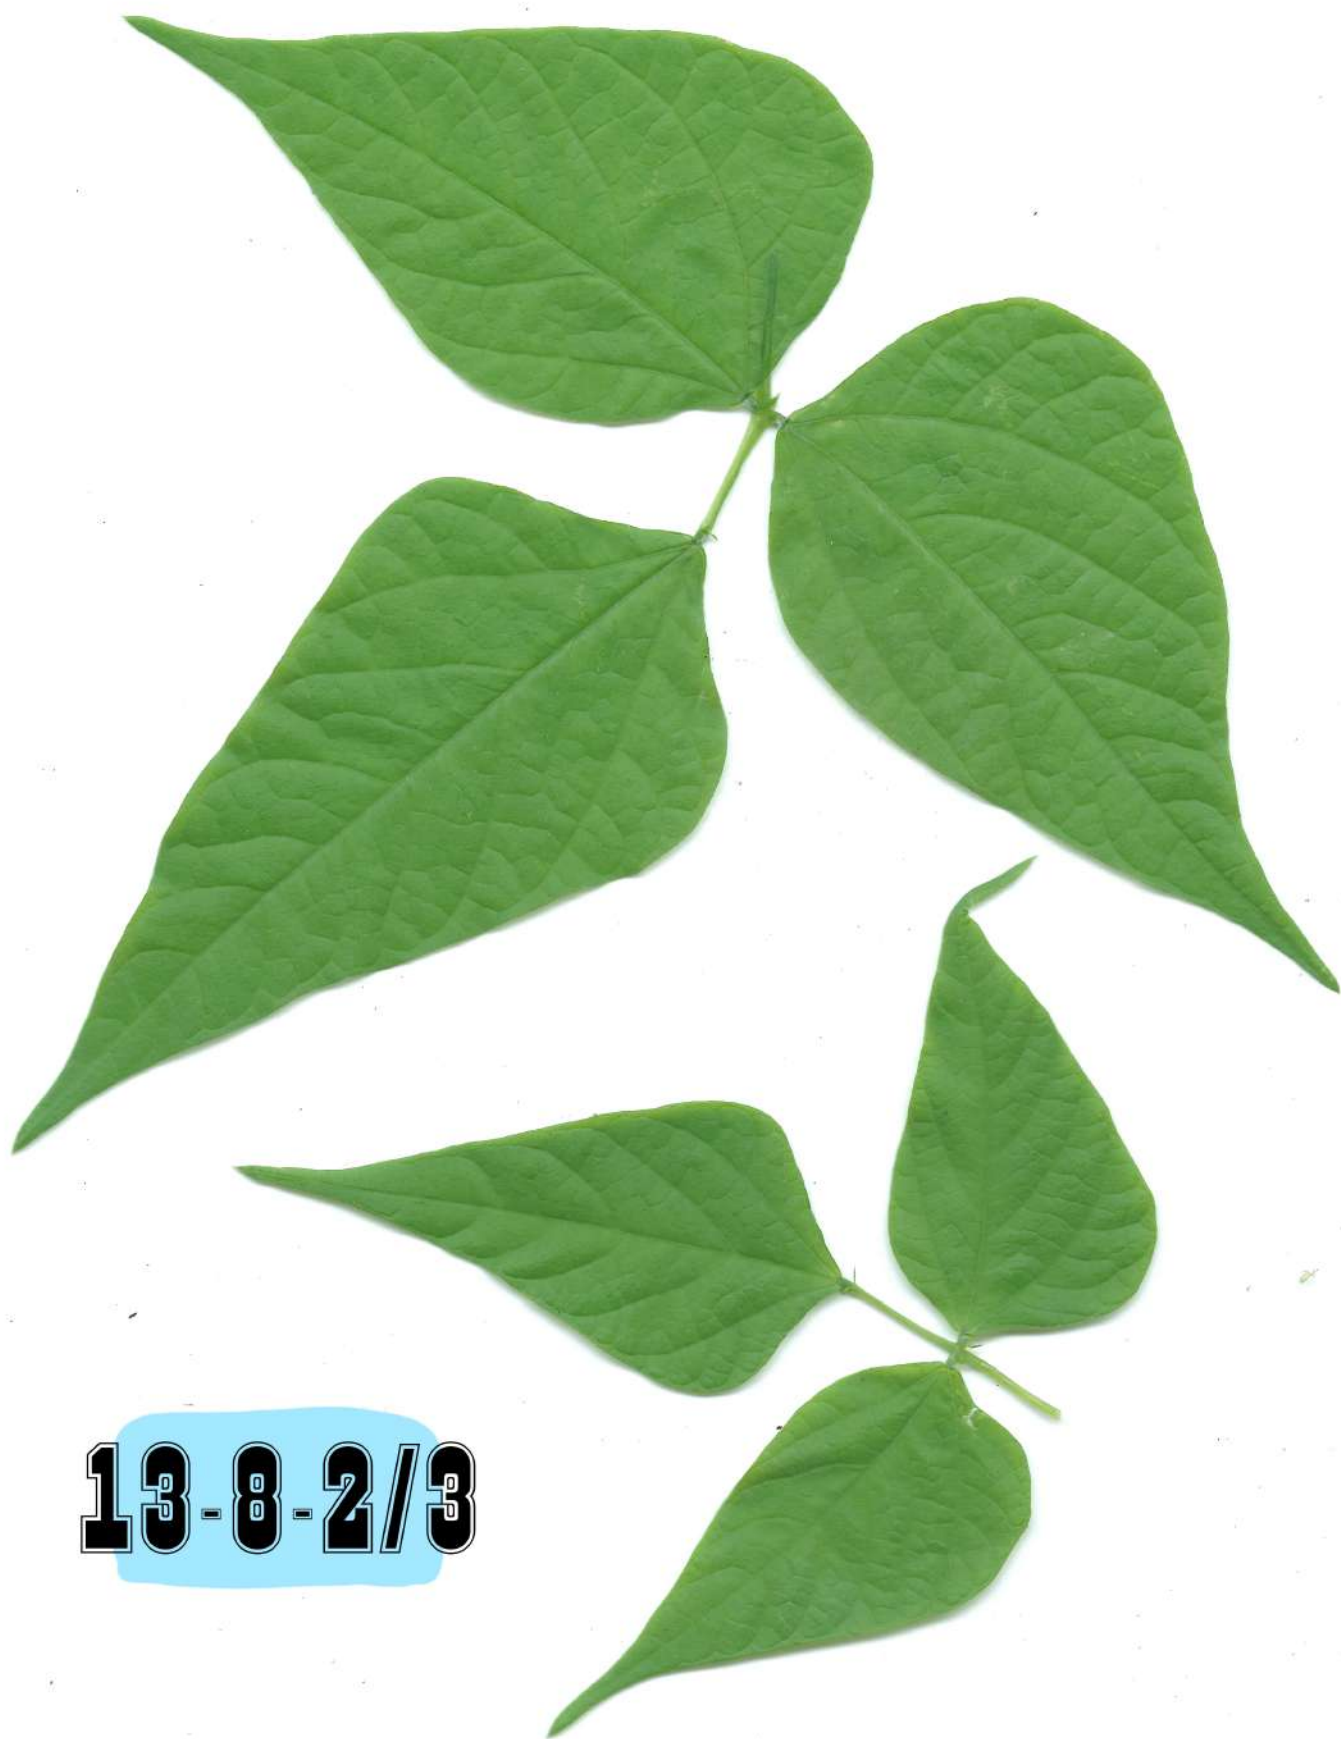

**13-8-2/3**

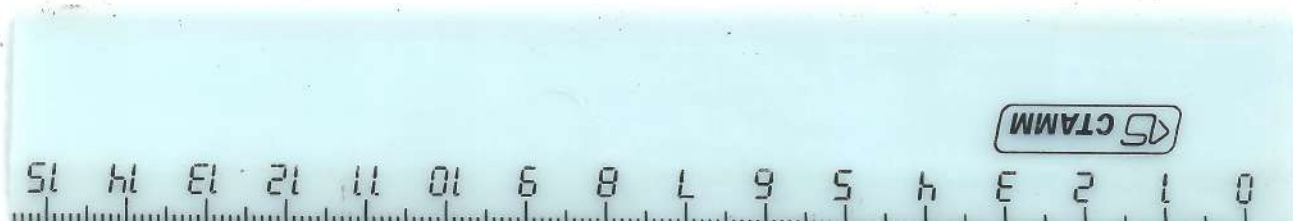



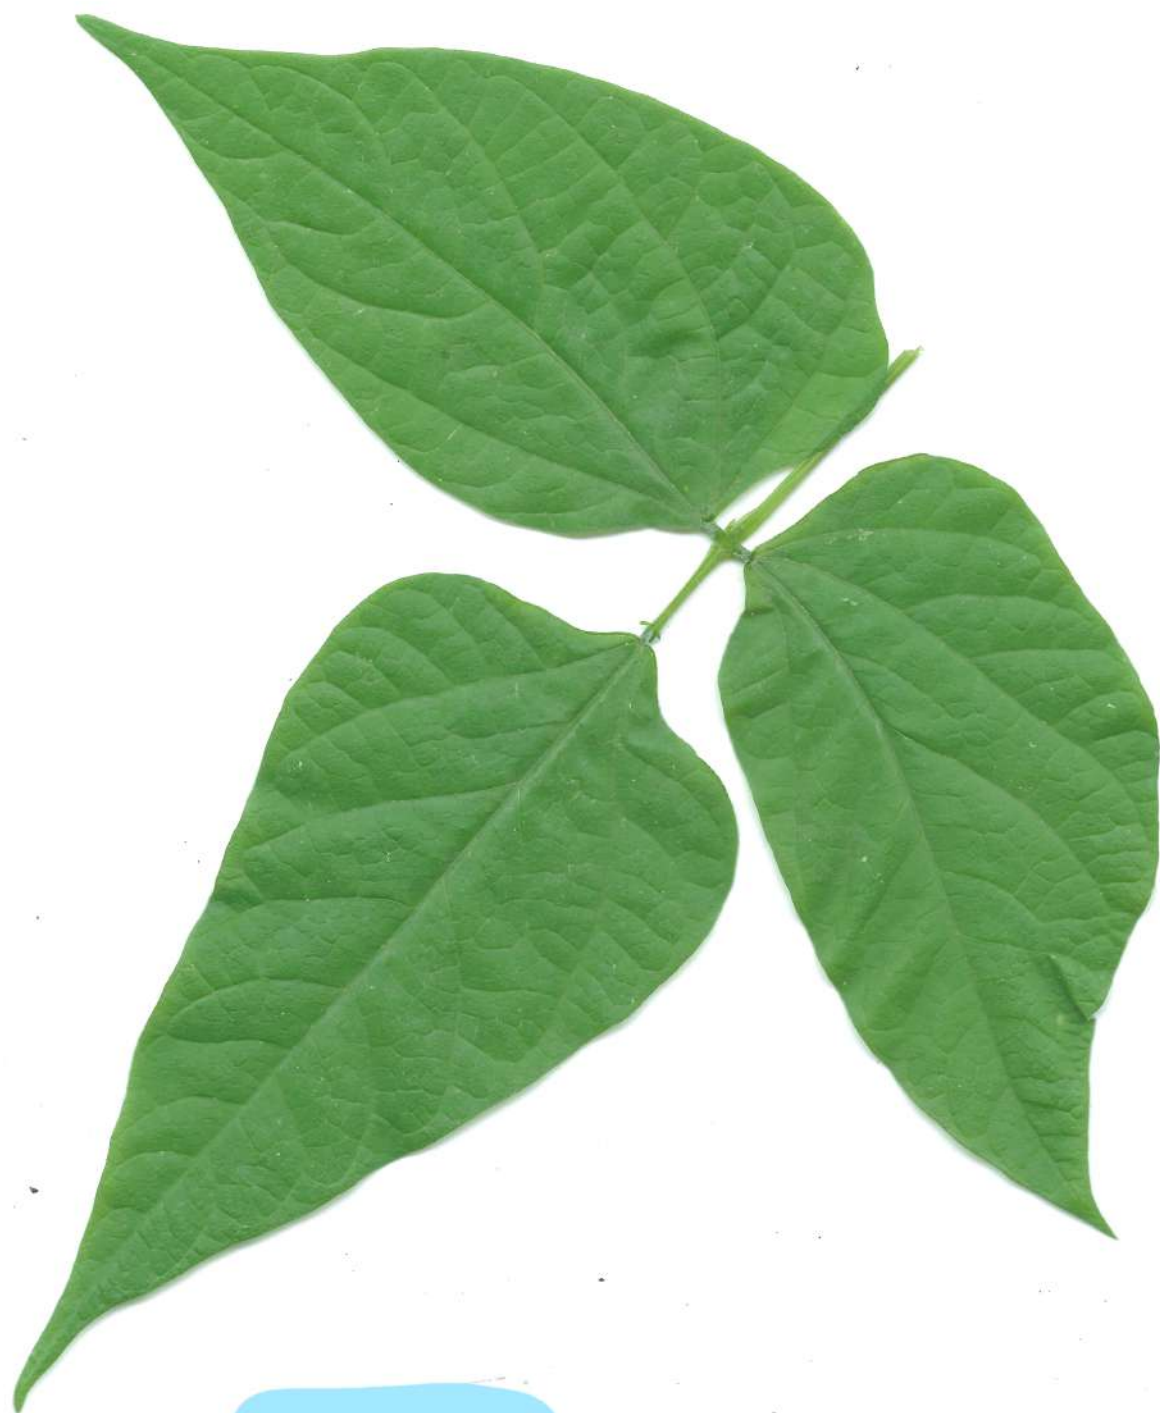

**13-9-1**

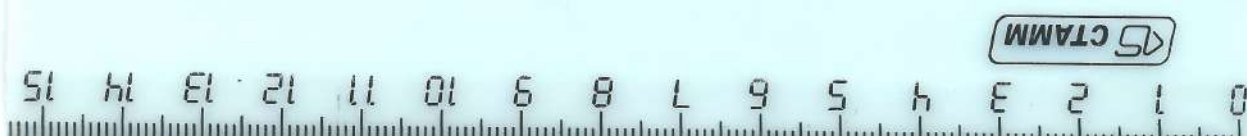



13-9-2/3

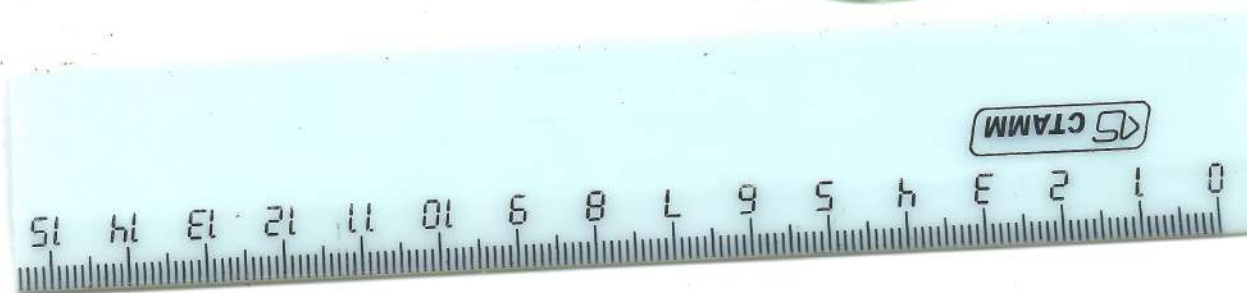

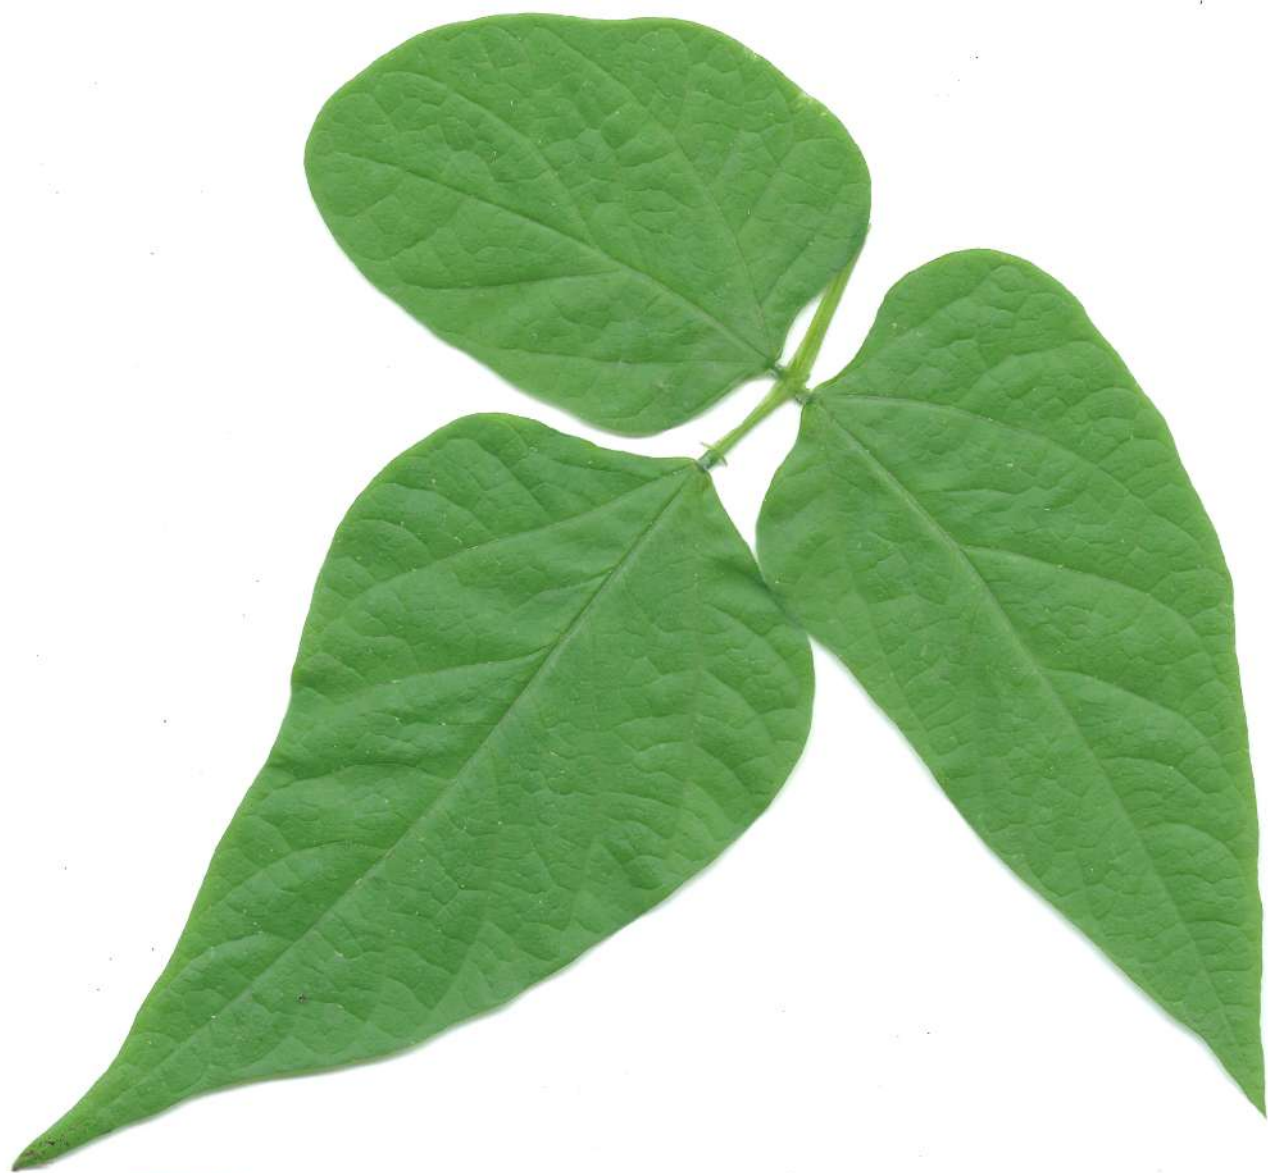

**13-10-3**

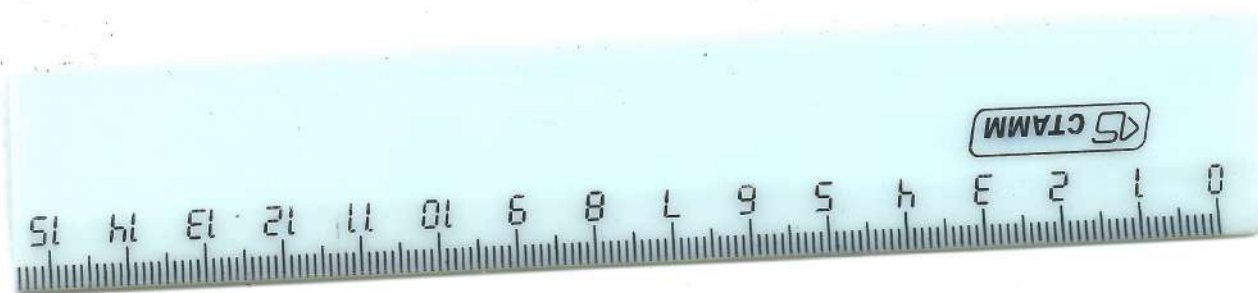

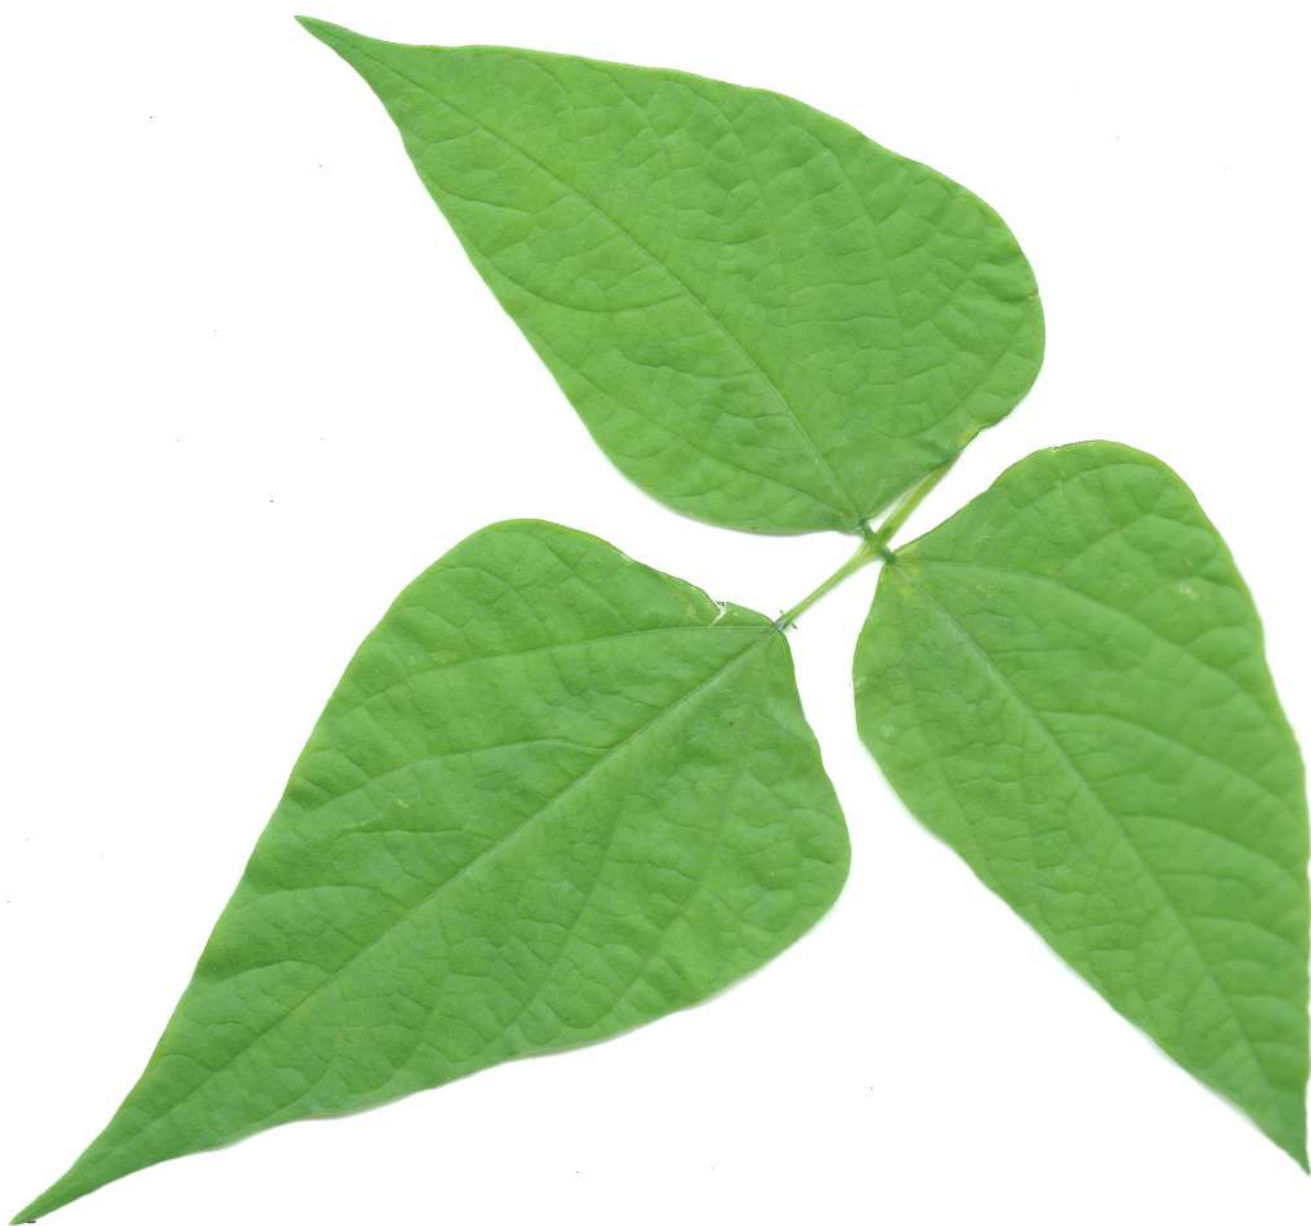

**13-10-2**

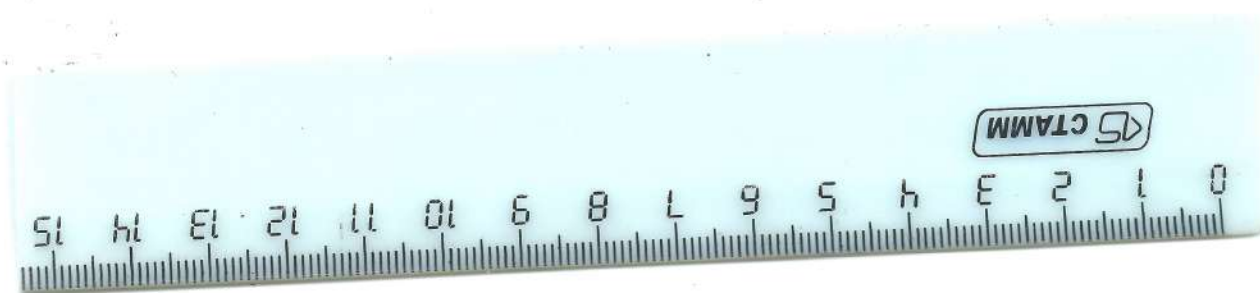



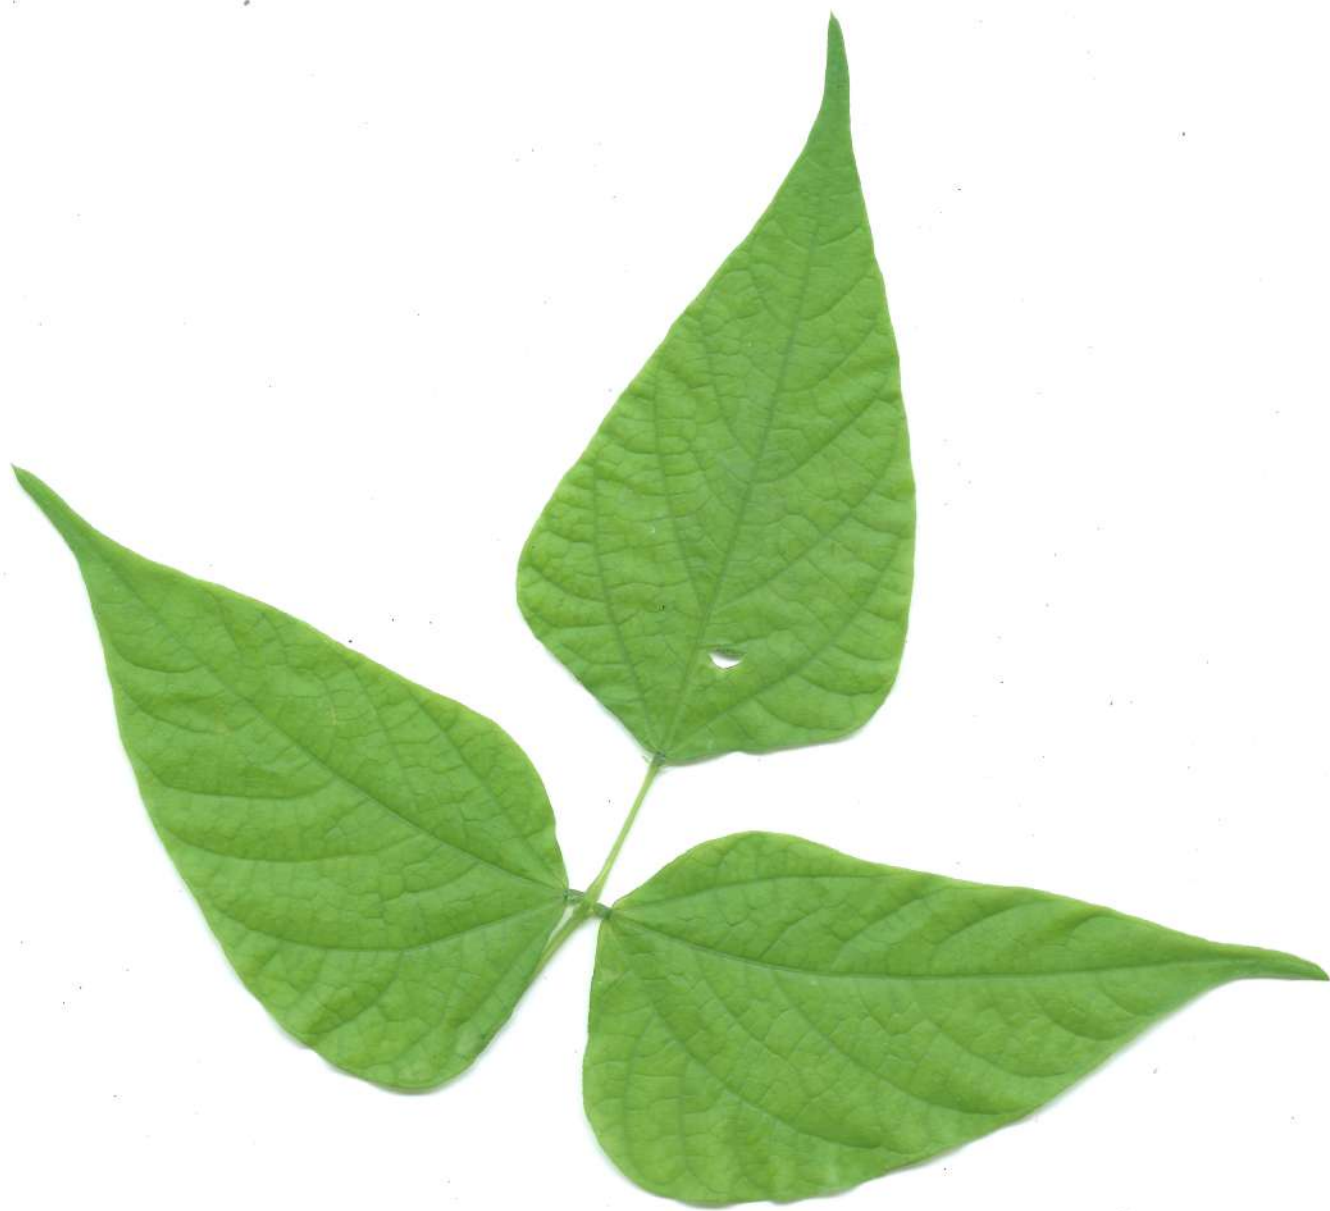

**13-10-1**



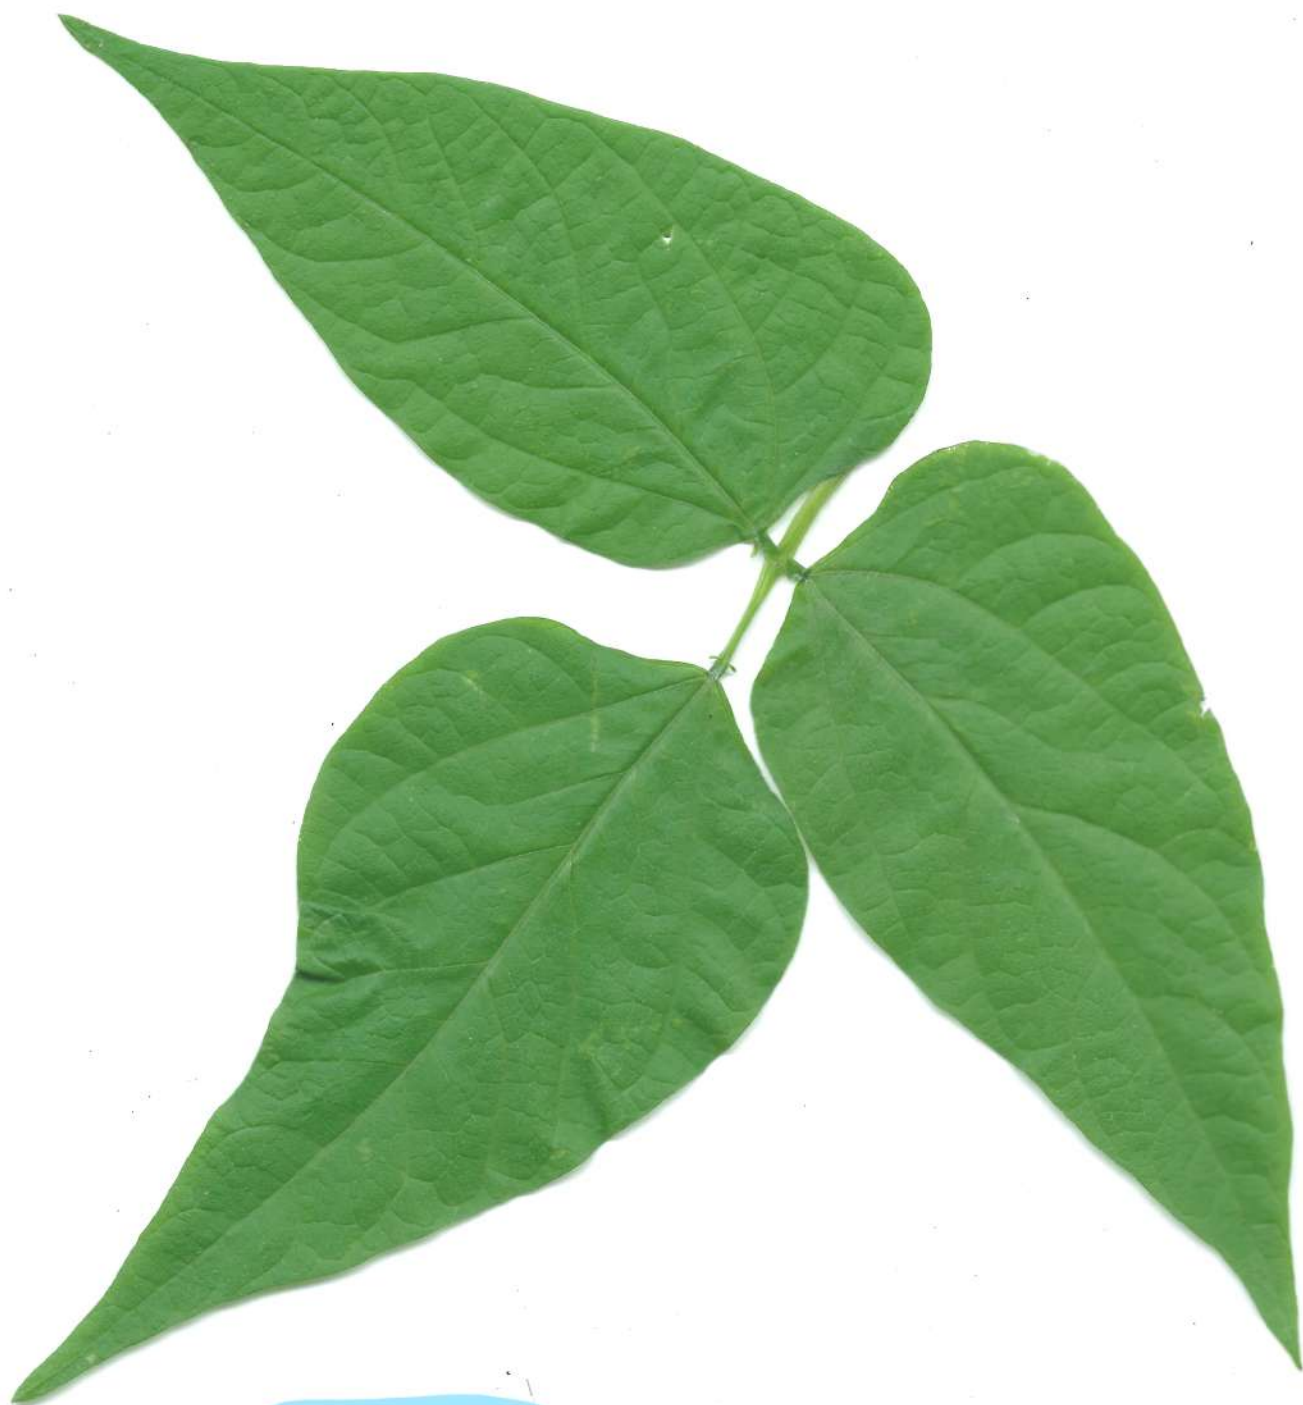

13-11-3

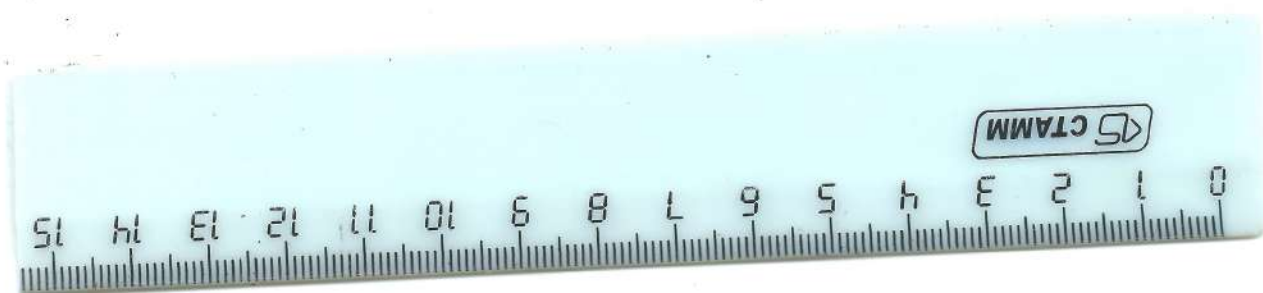

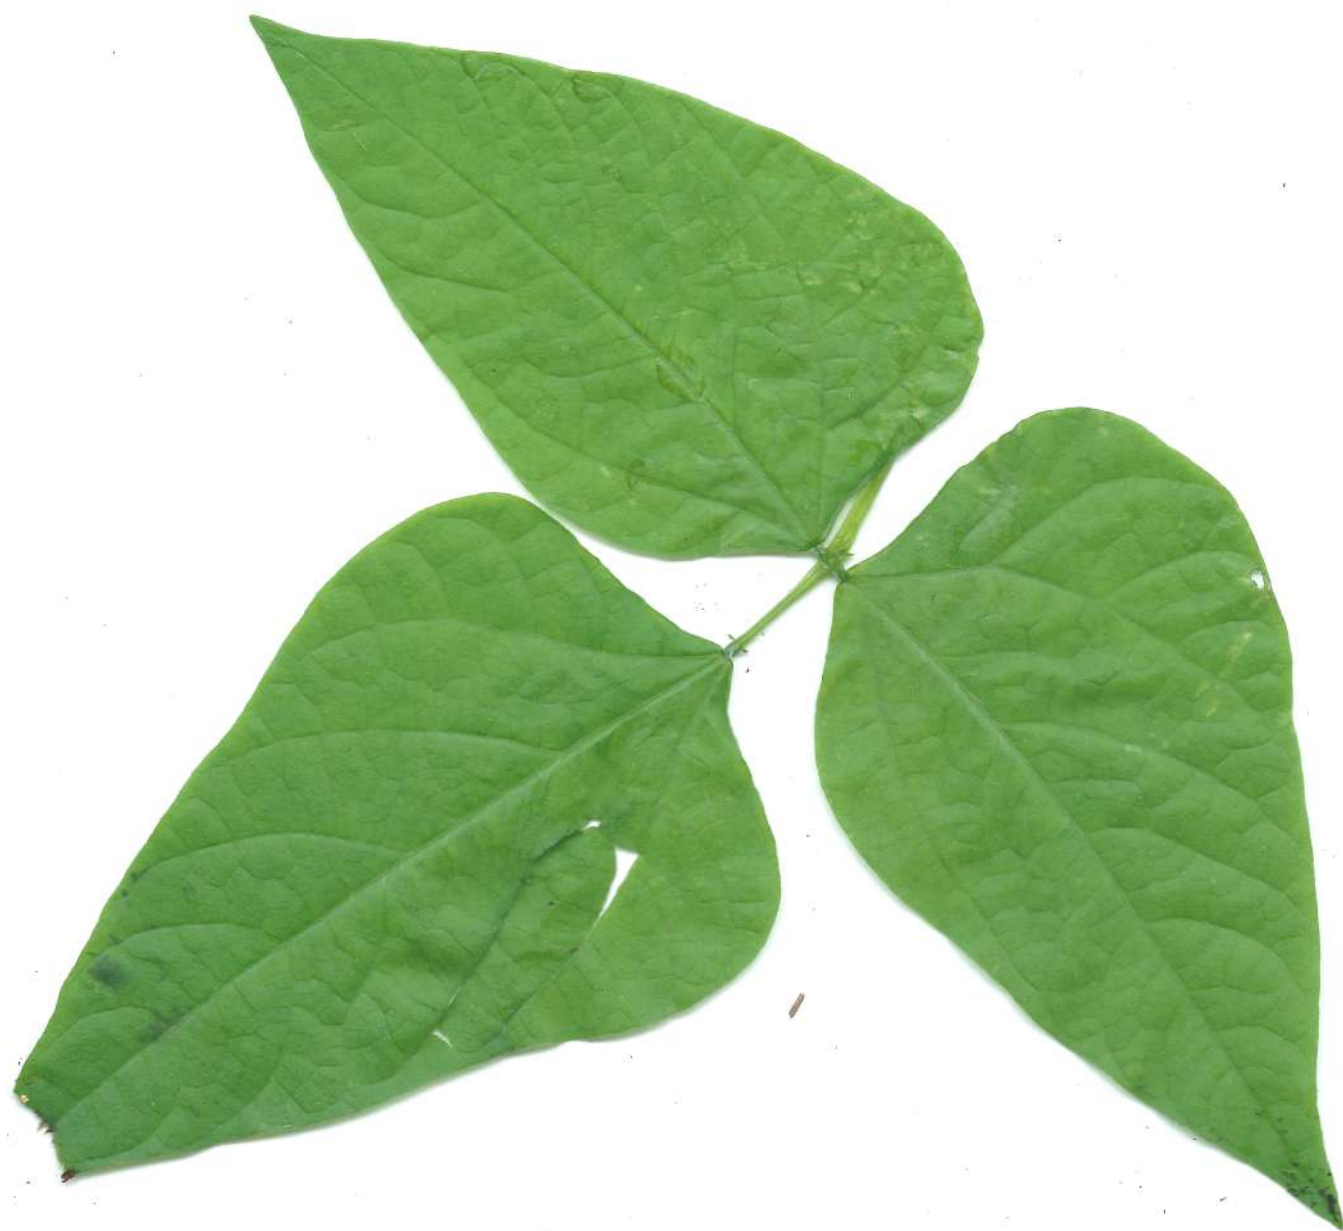

**13-11-2**

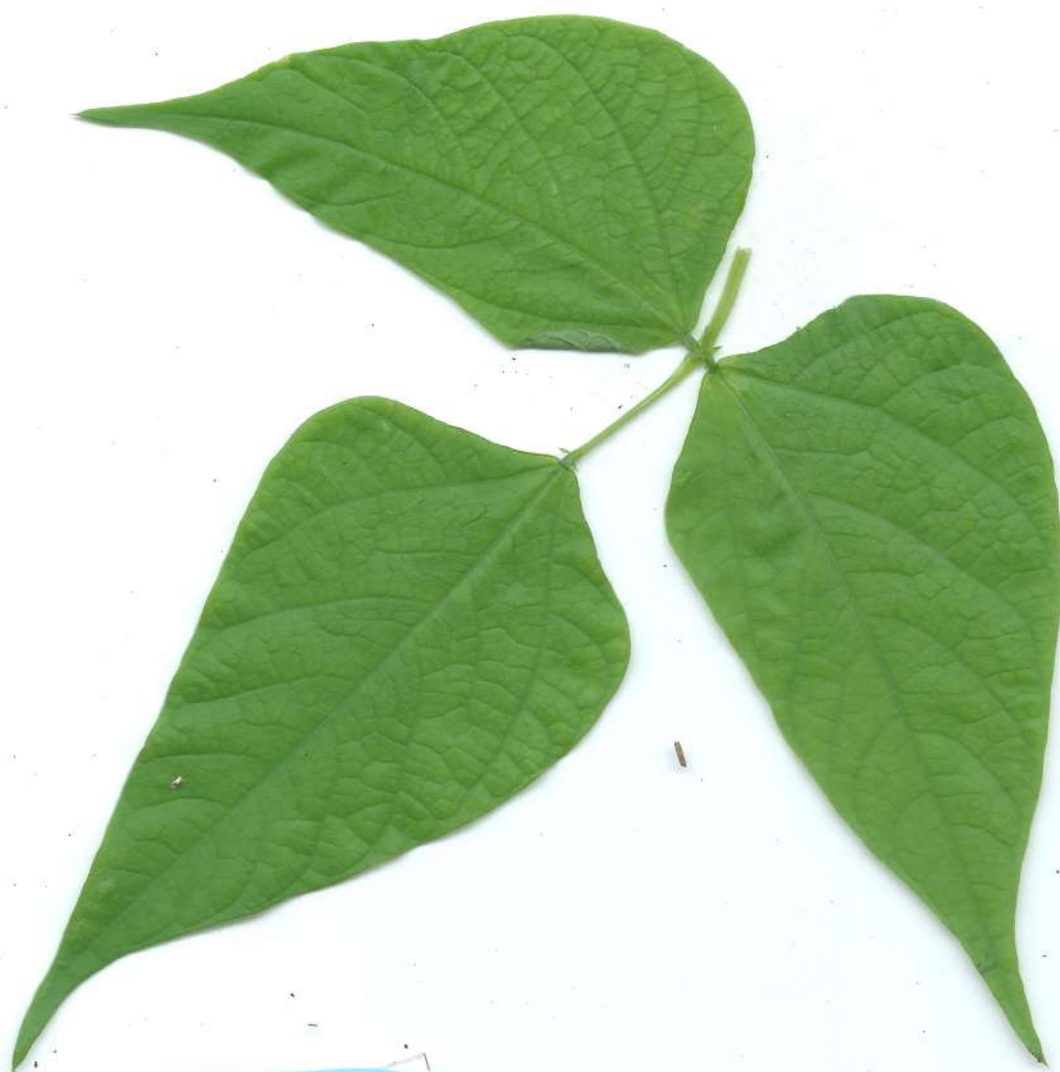

**13-11-1**

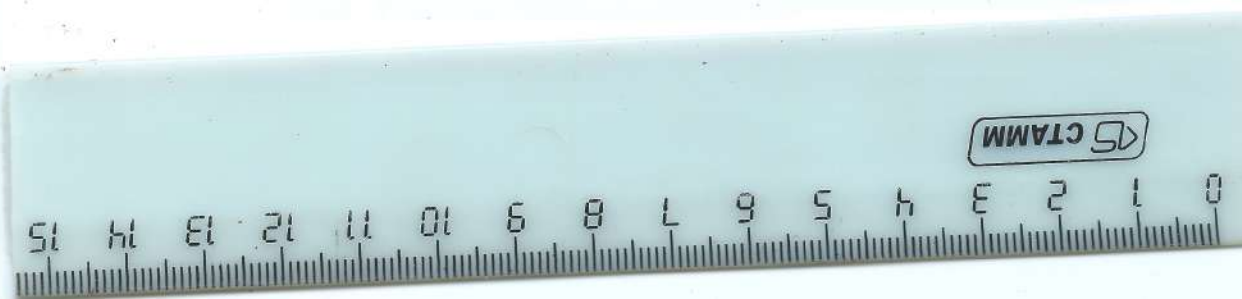



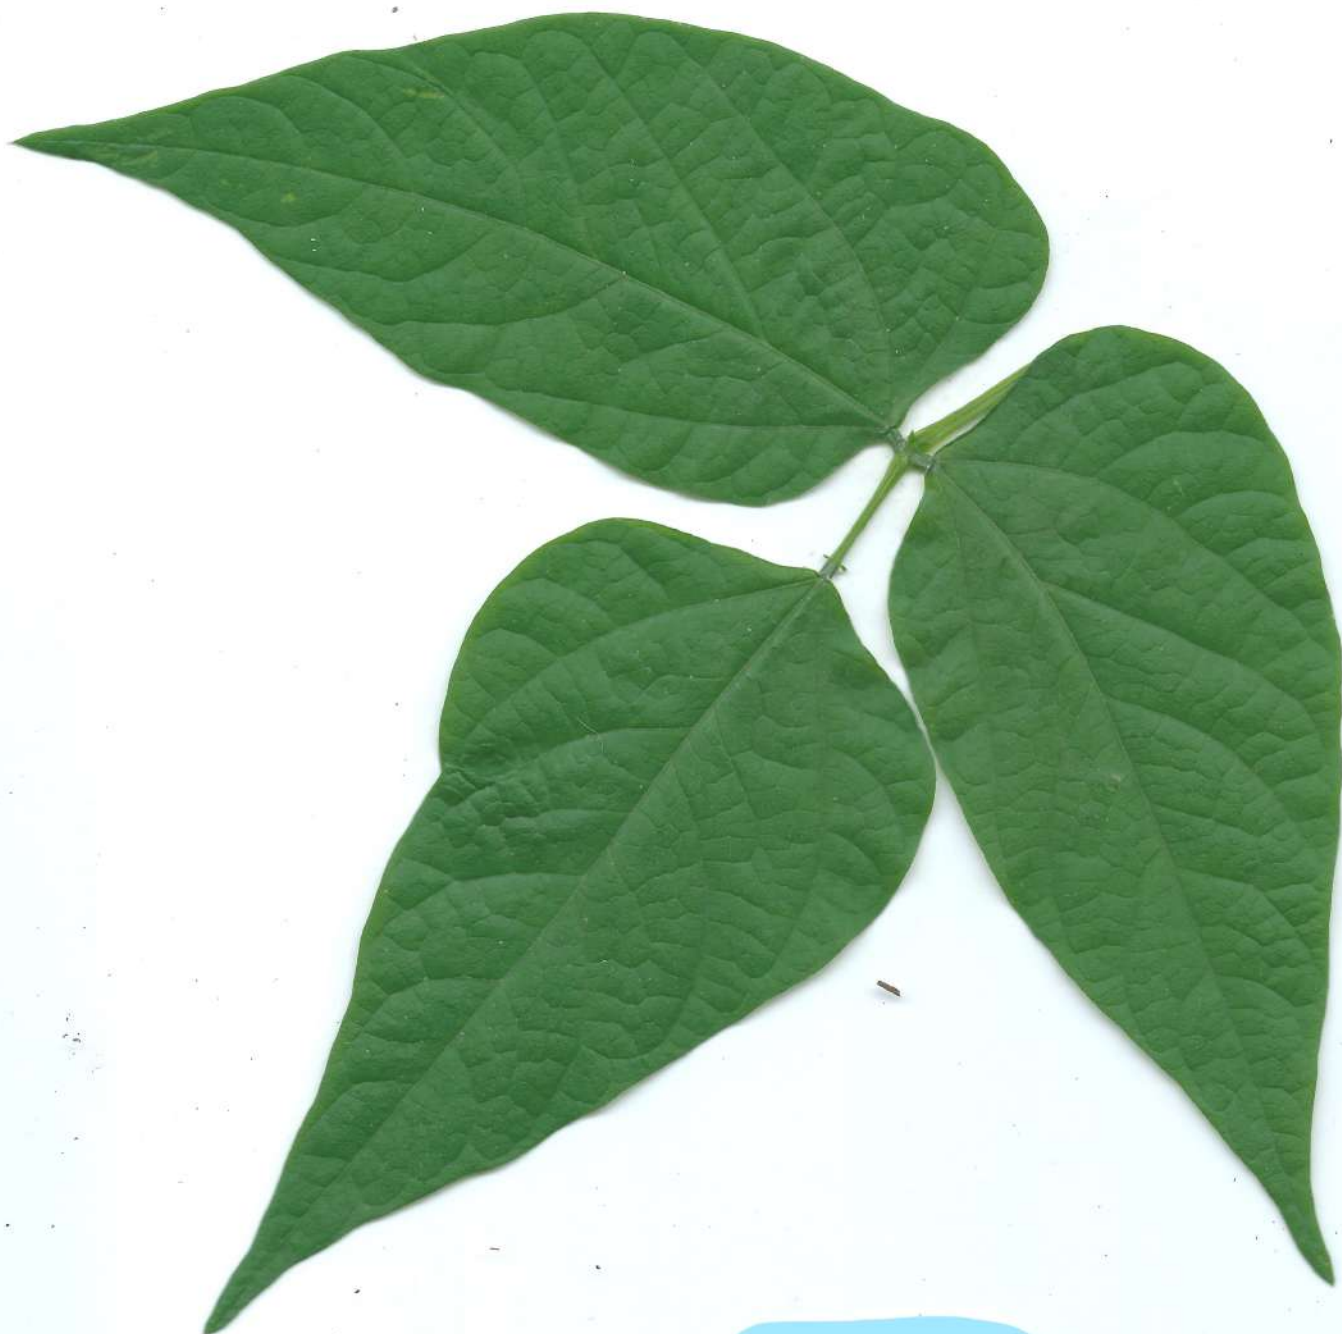

**13-12-3**

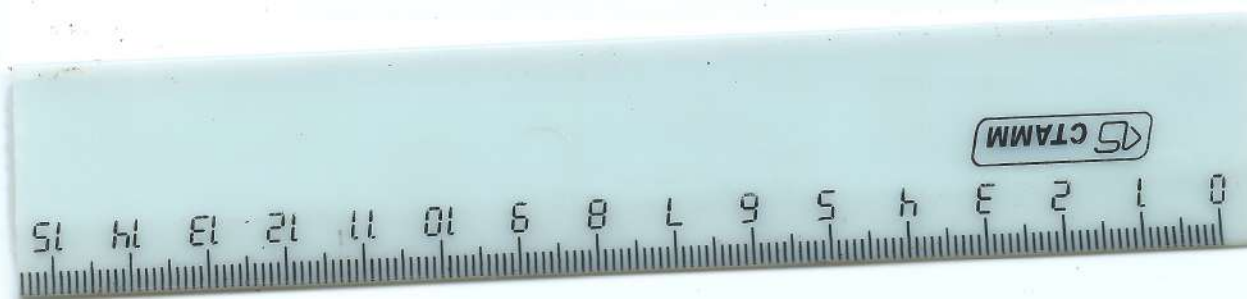



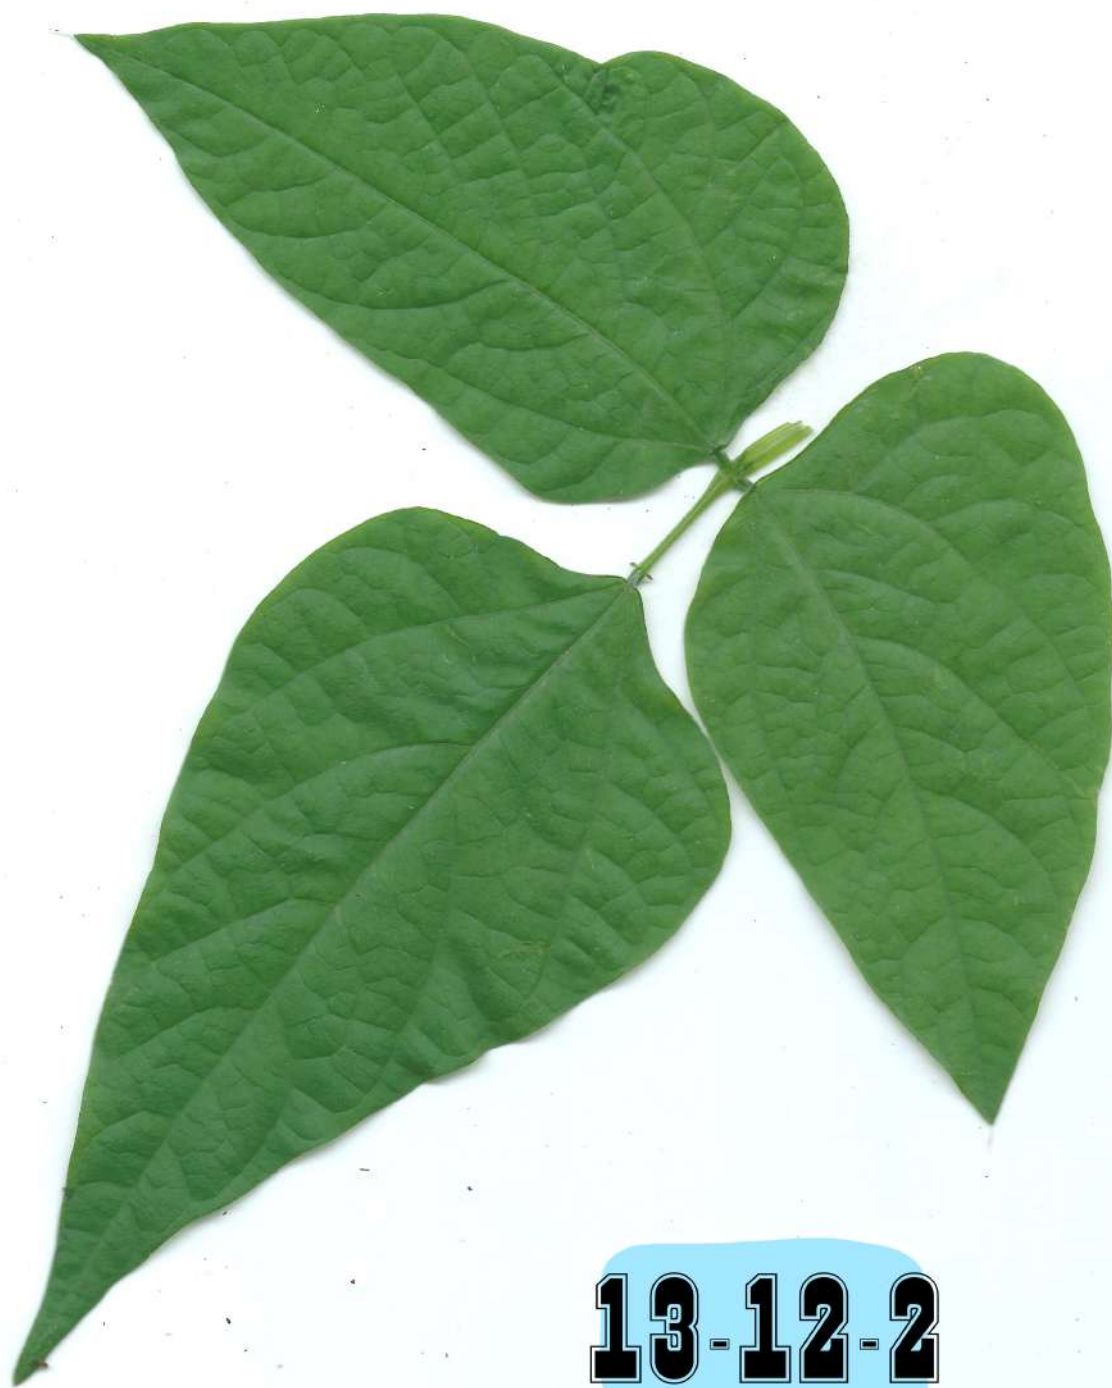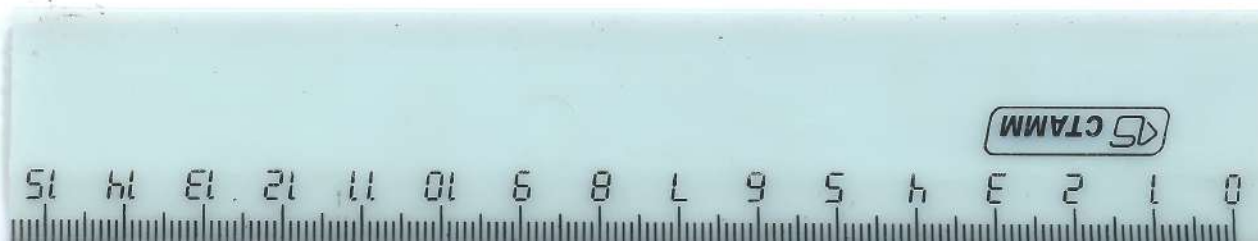

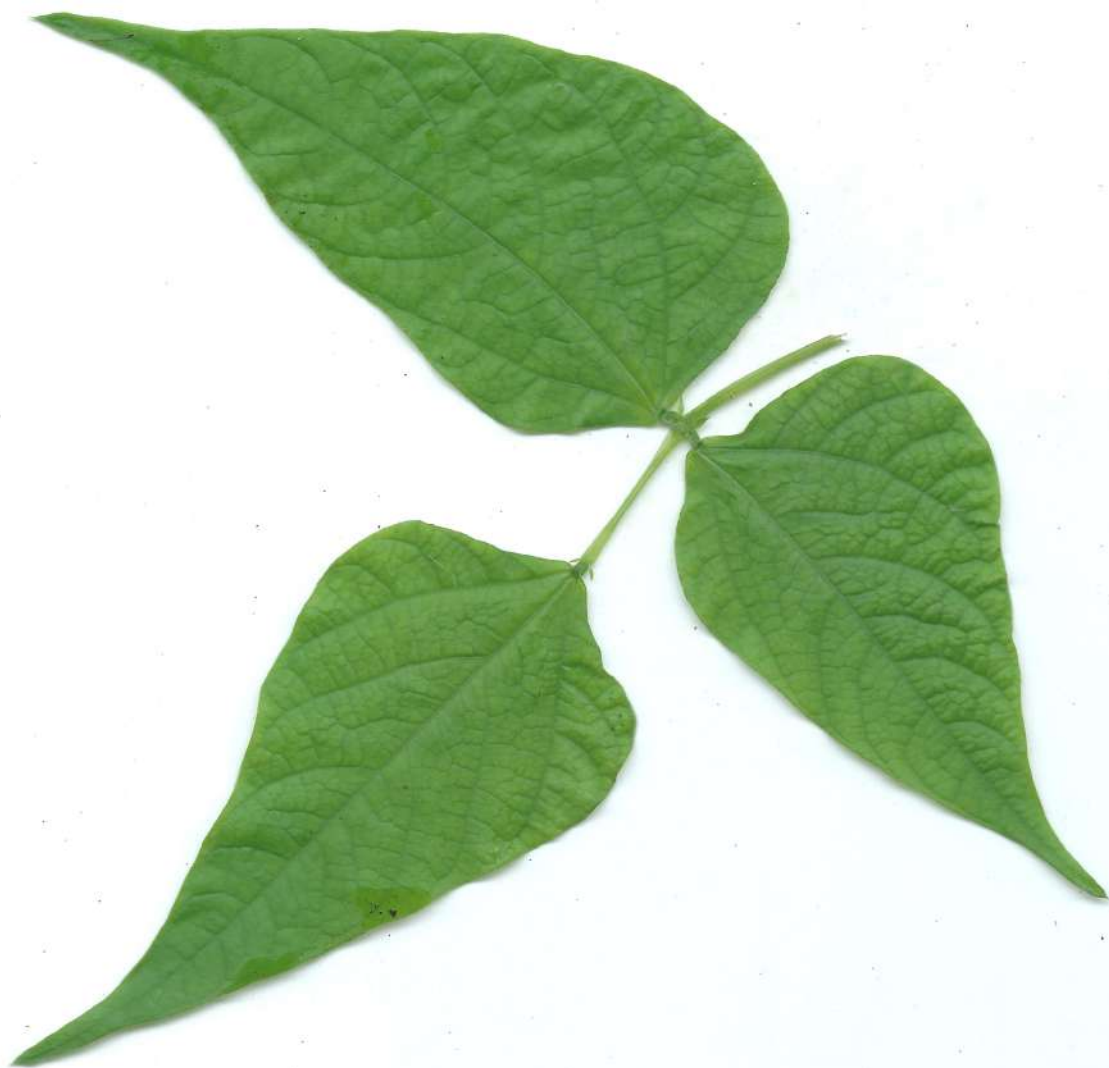

**13-12-1**

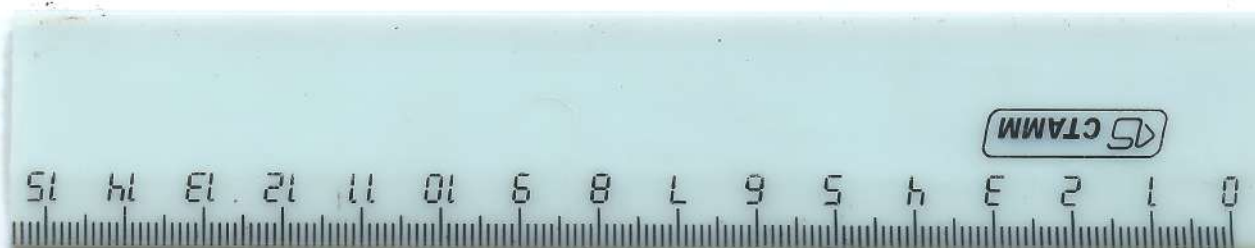

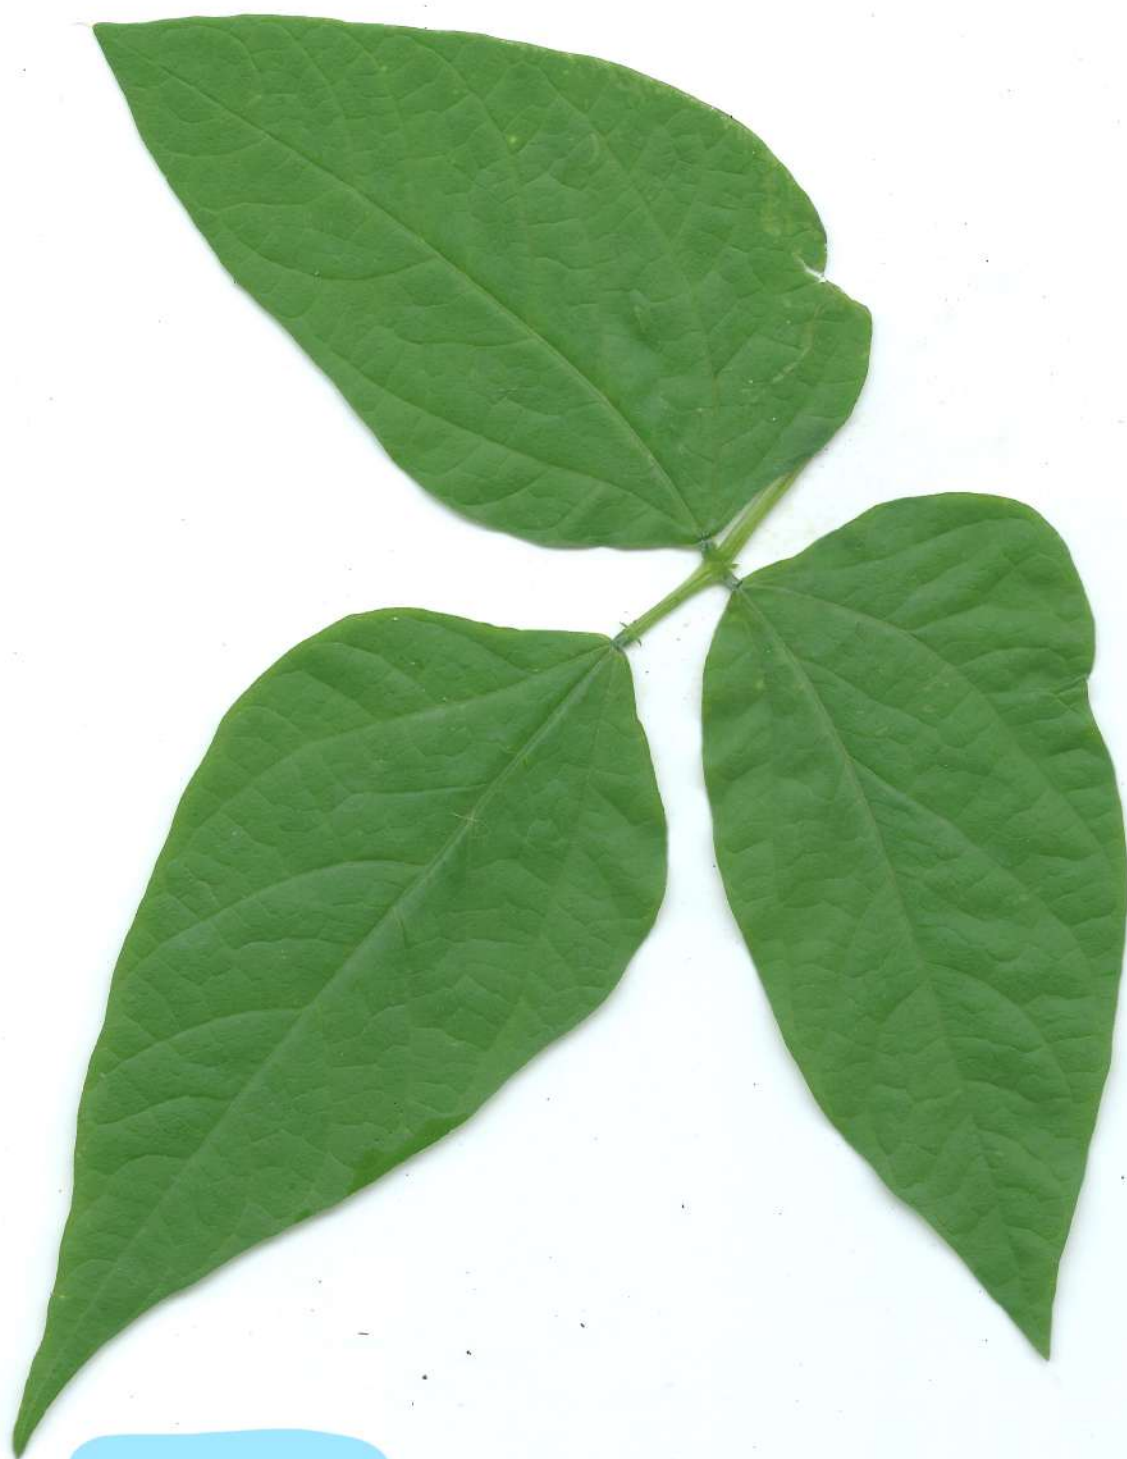

**13-13-3**

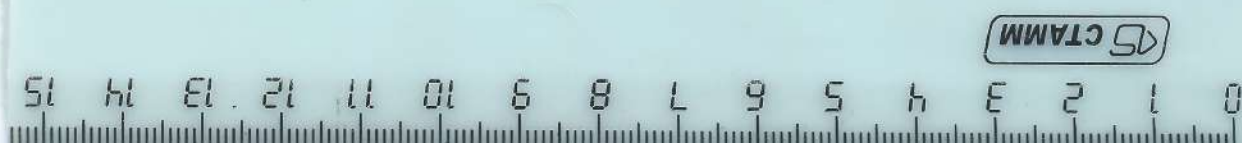

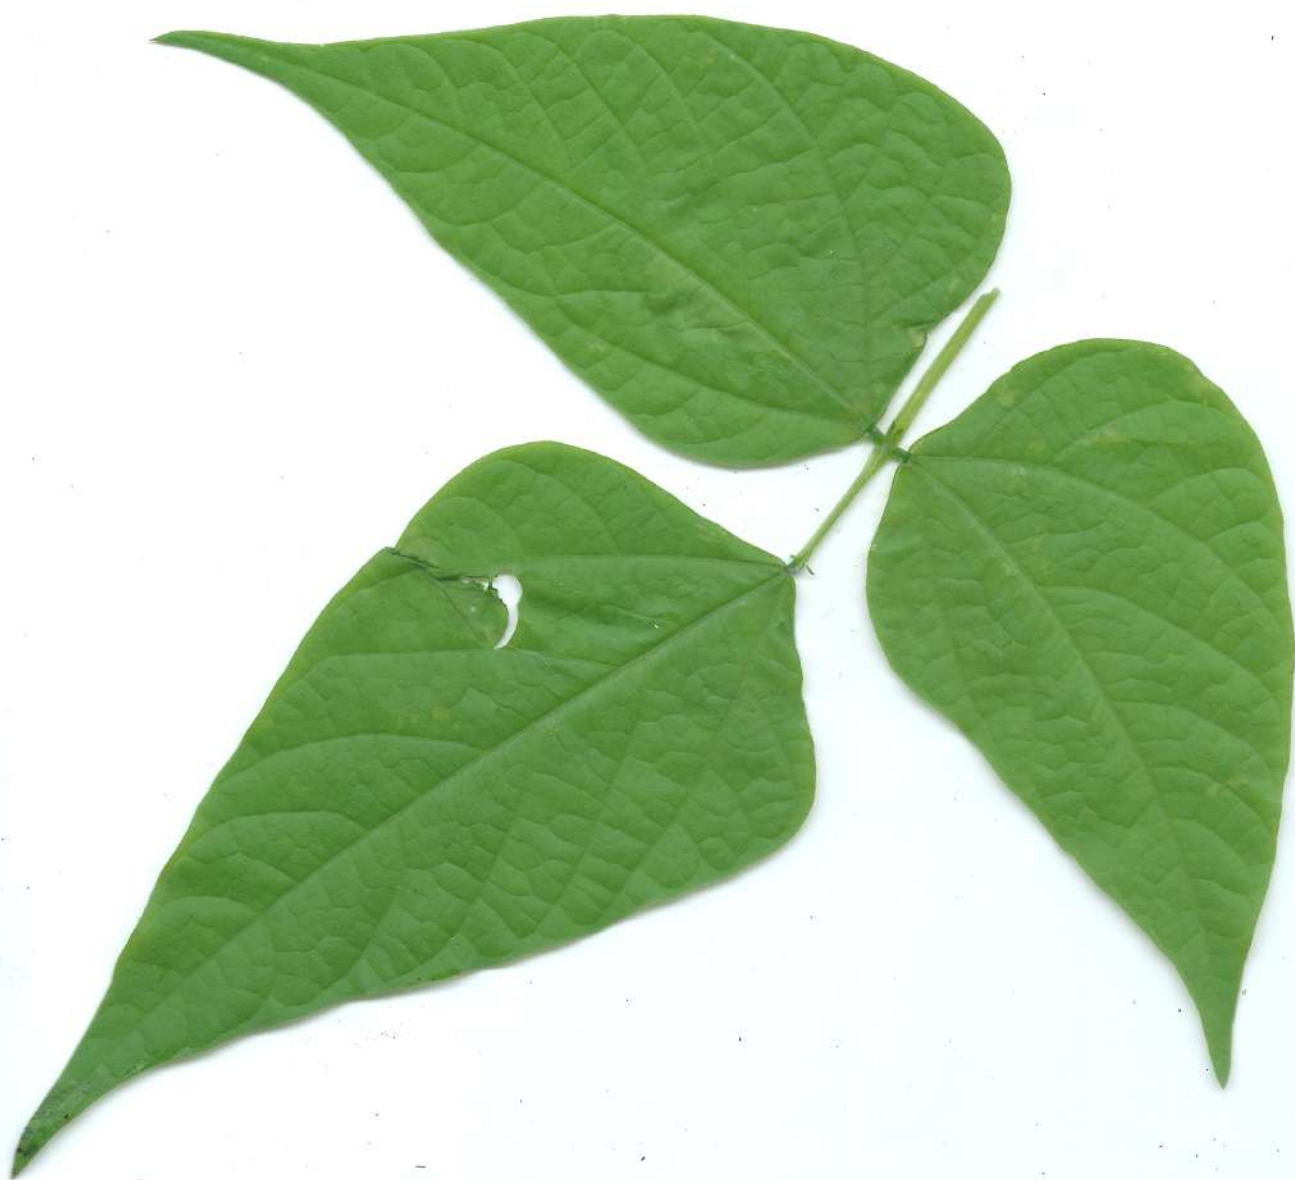

**13-13-2**

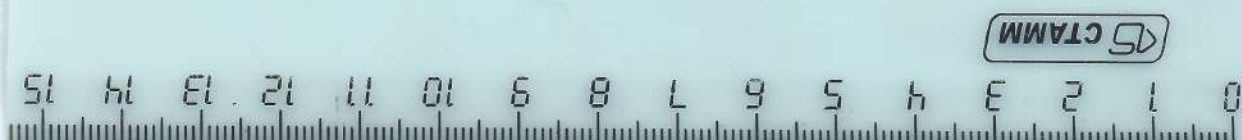



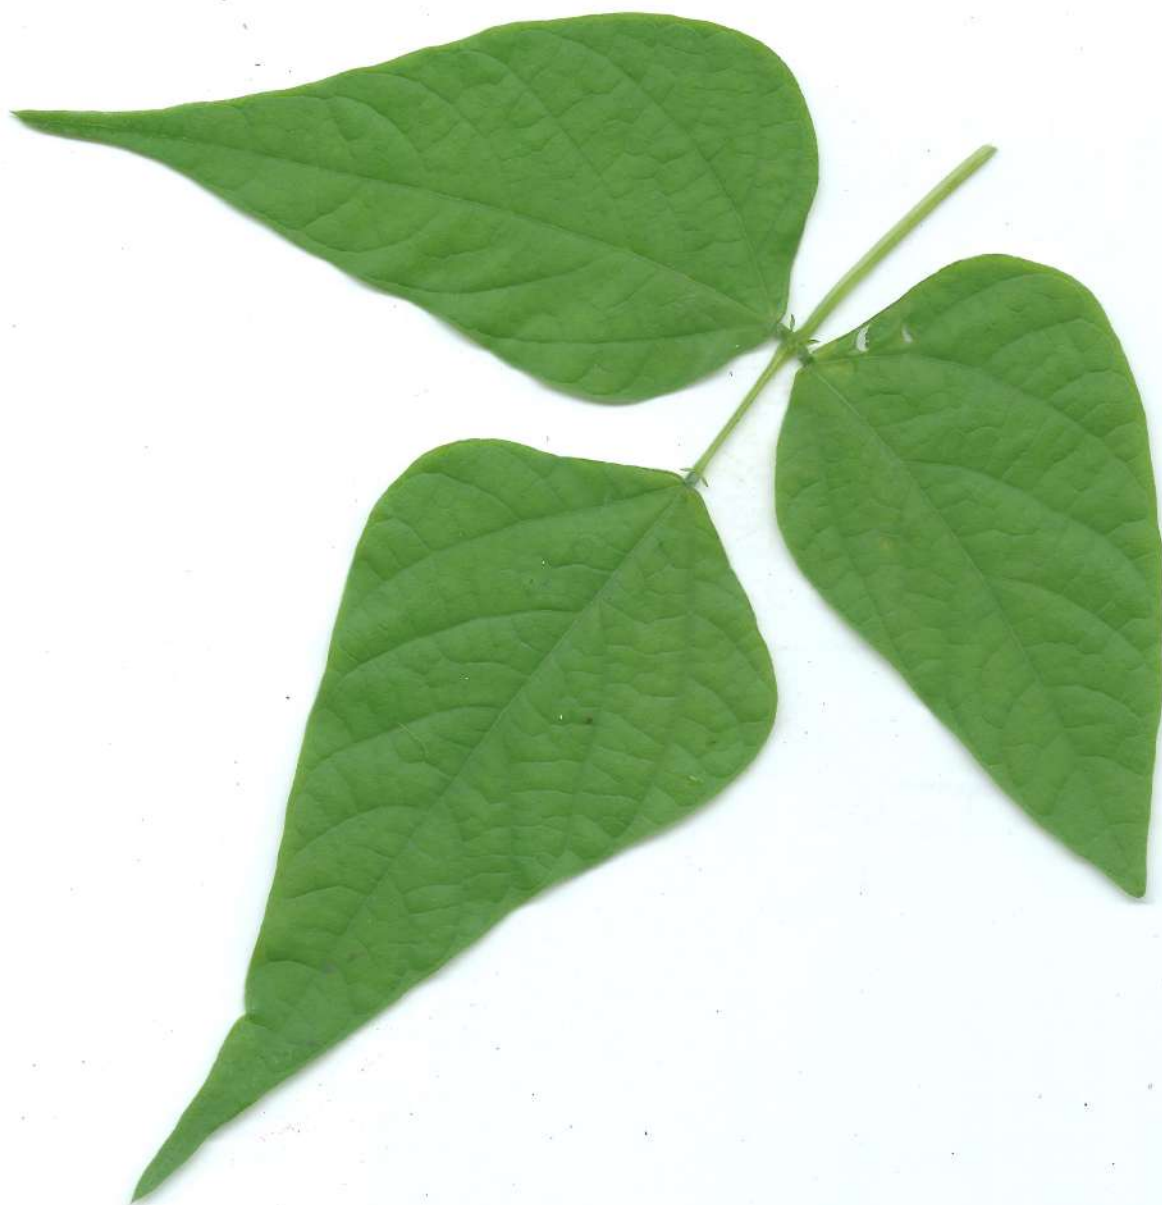

**13-13-1**

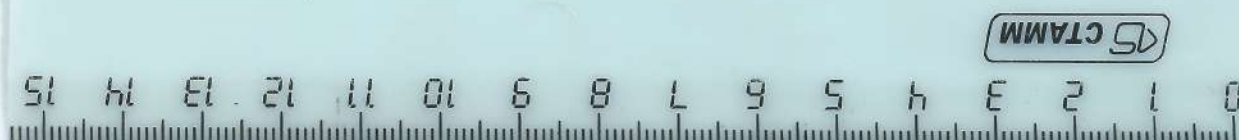

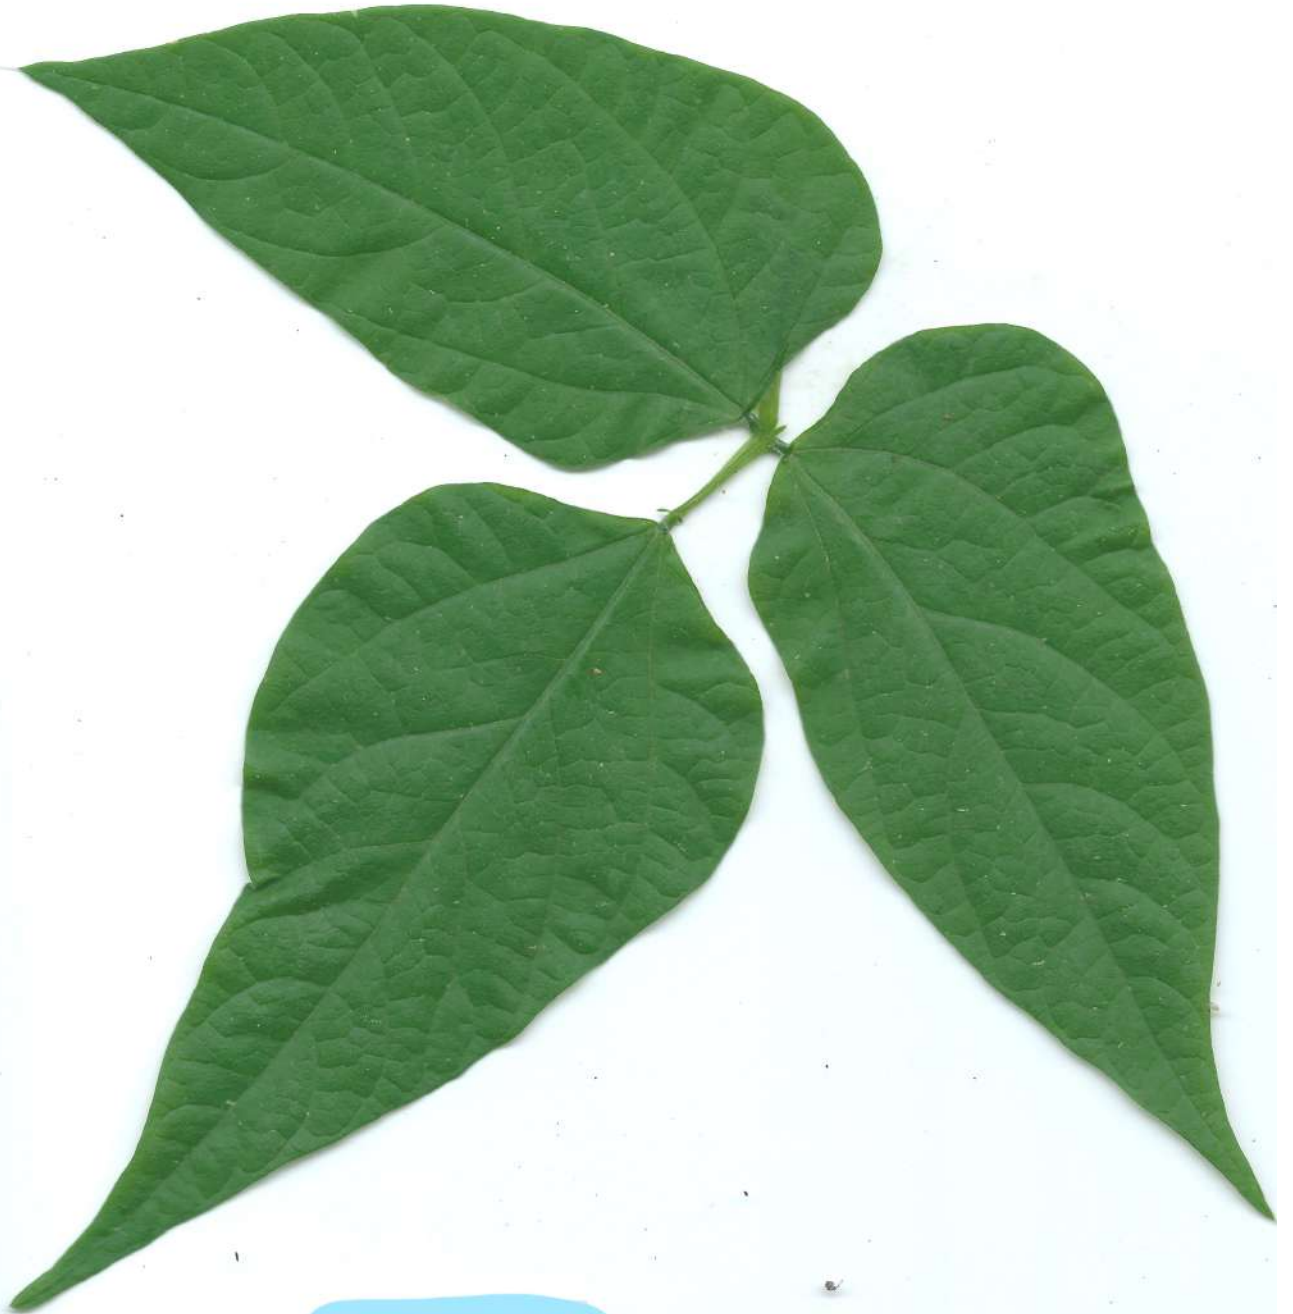

13-7-3

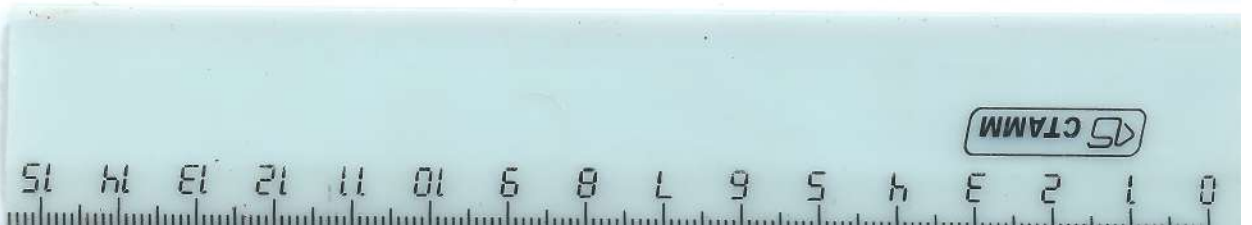

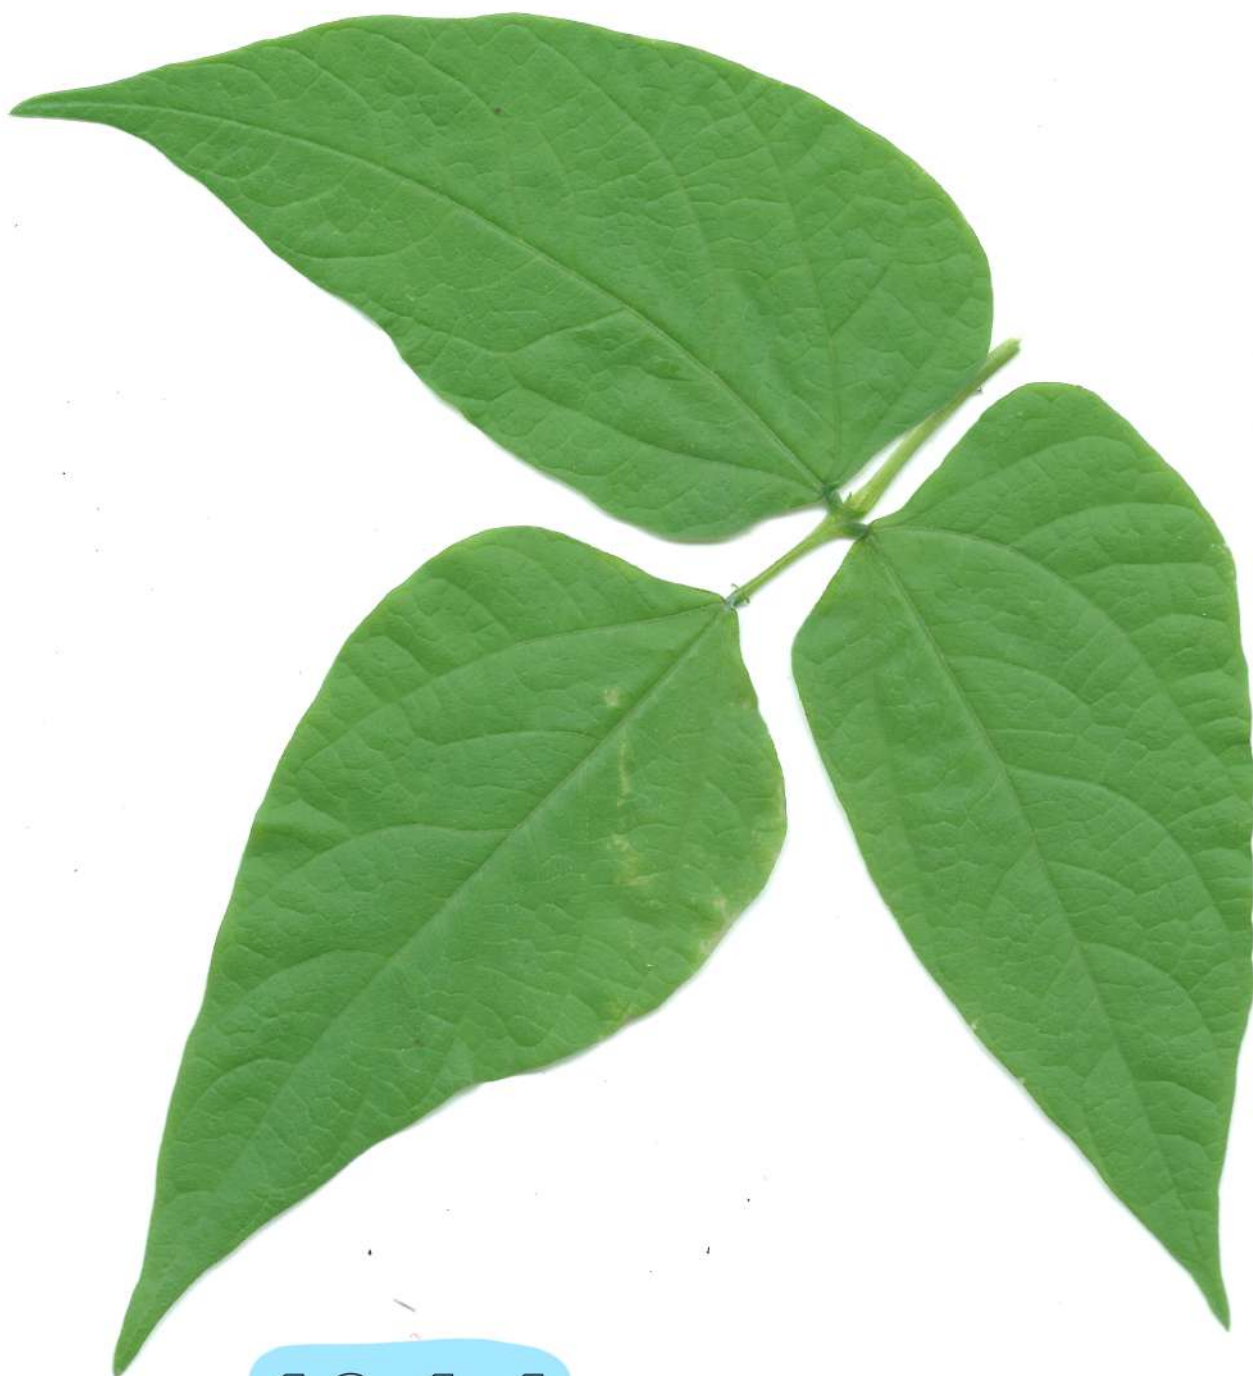

**13-1-1**

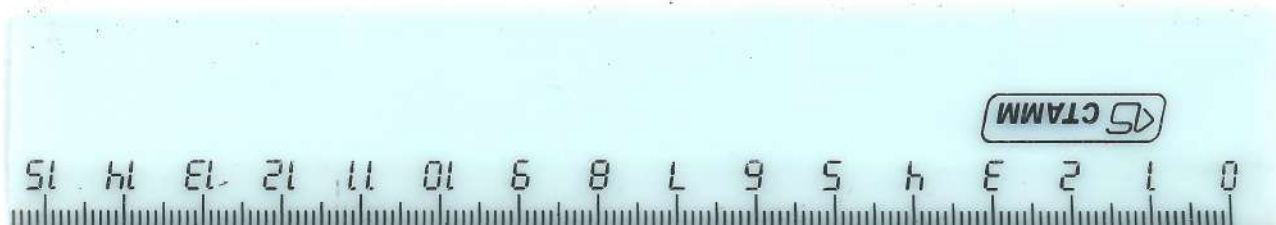

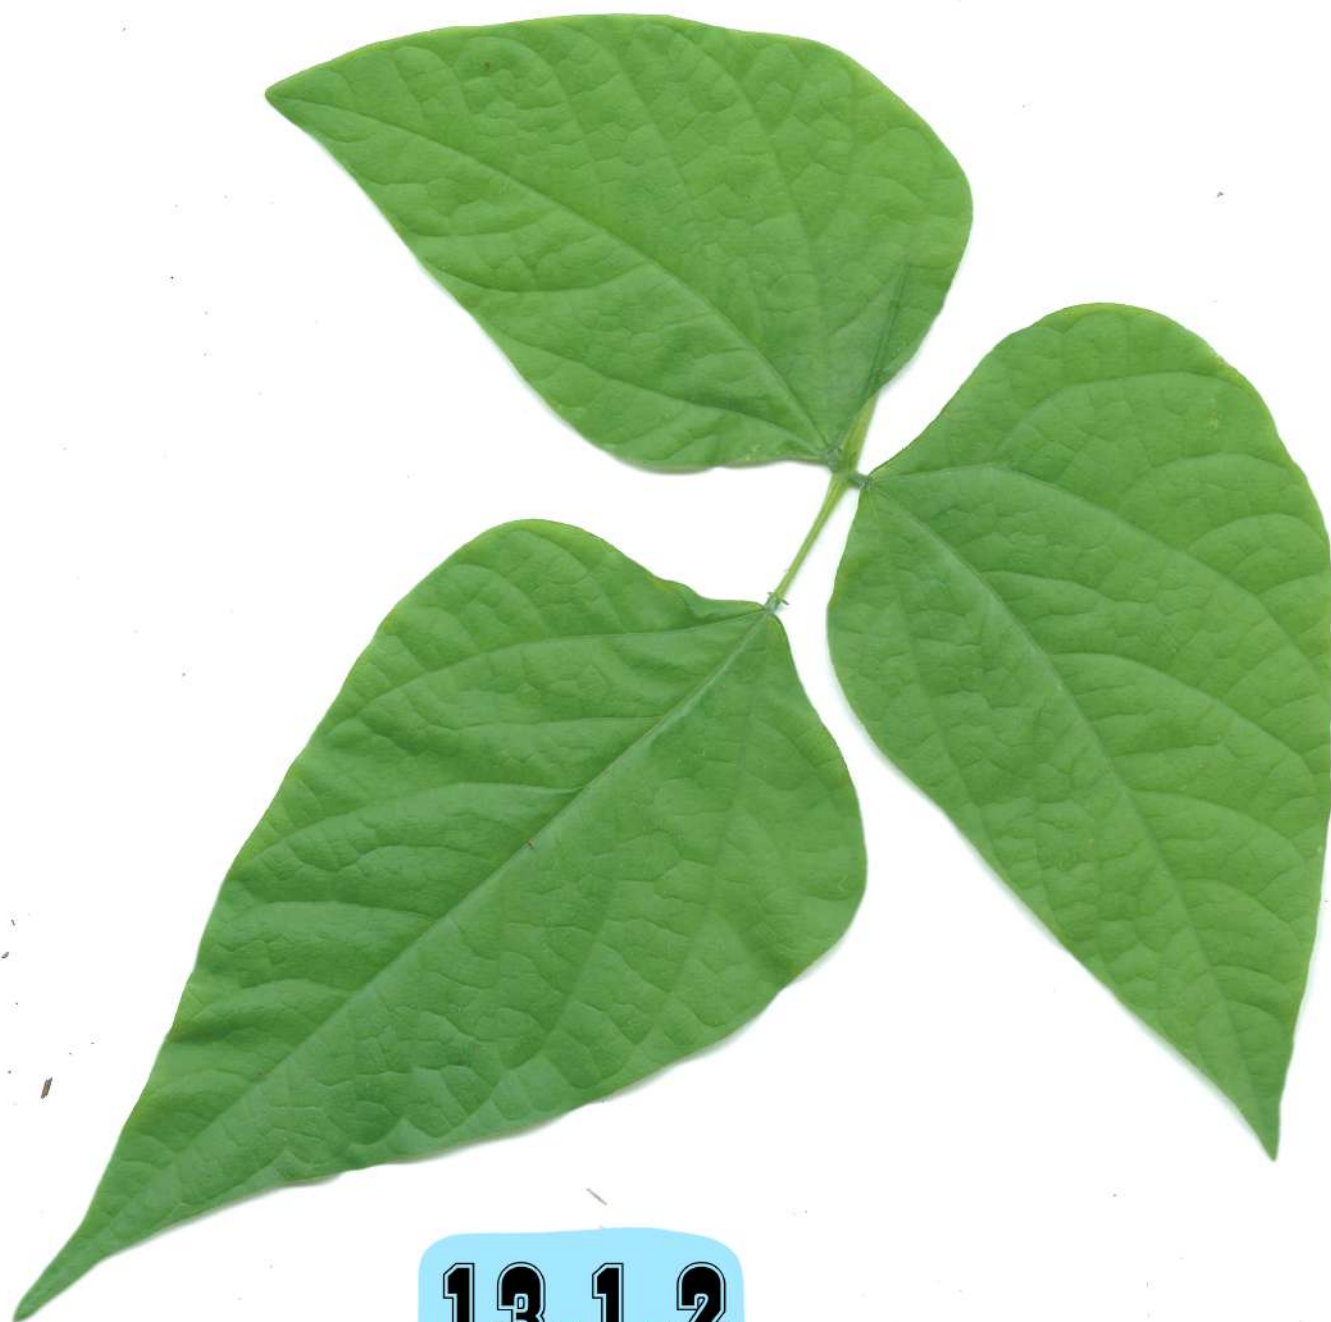

13-1-2

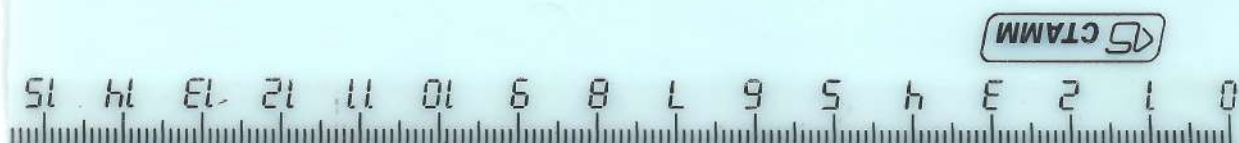



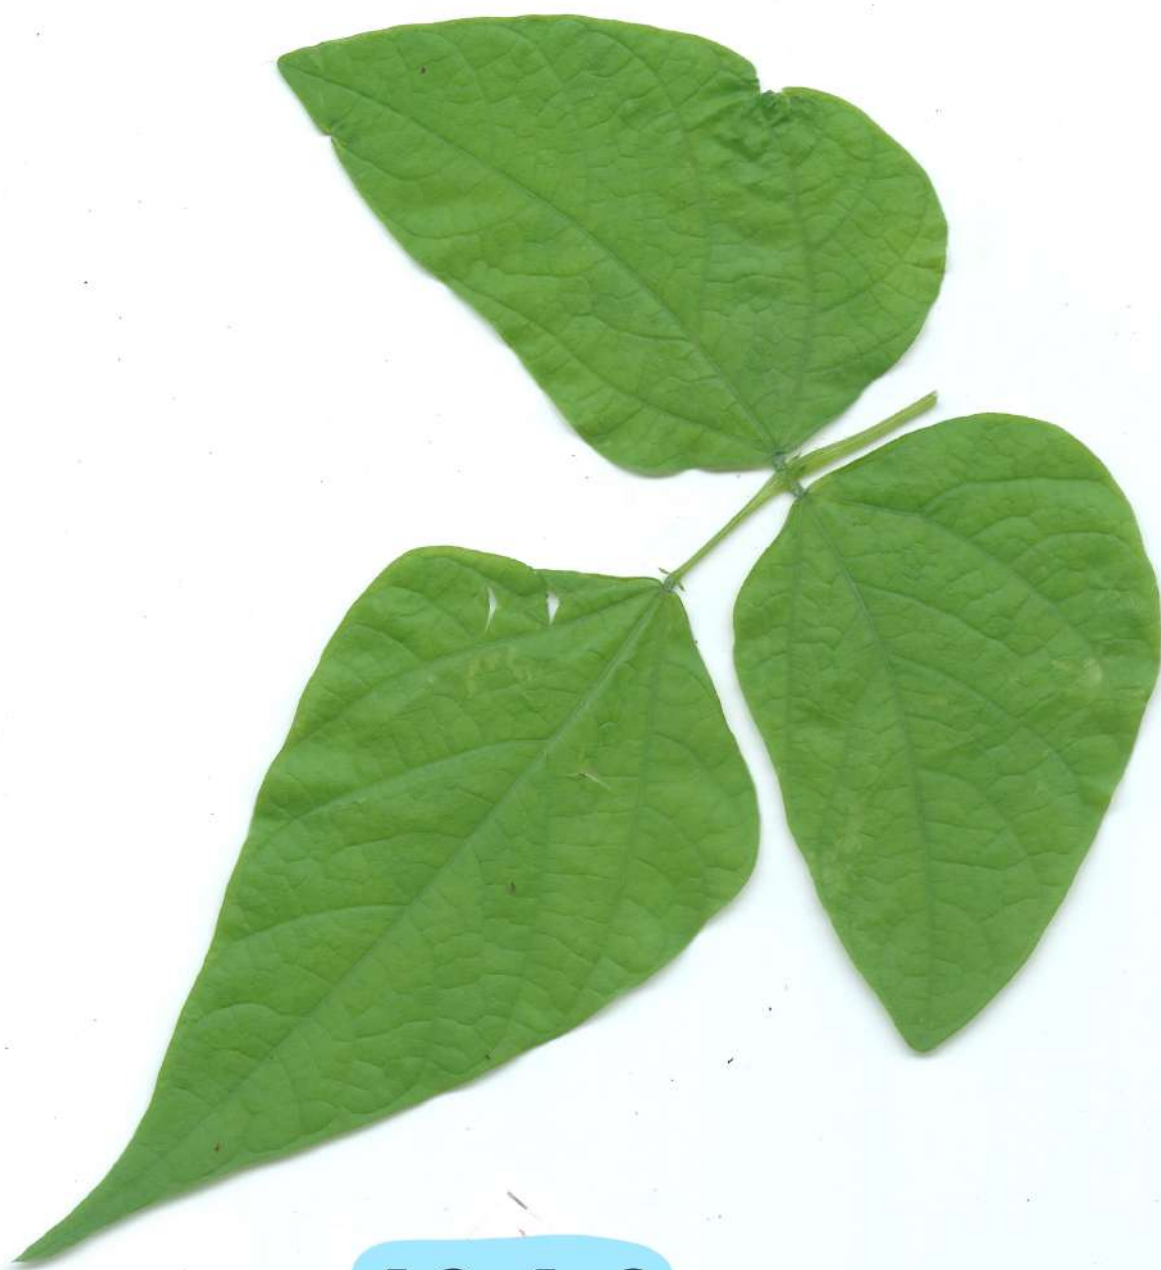

13-1-3

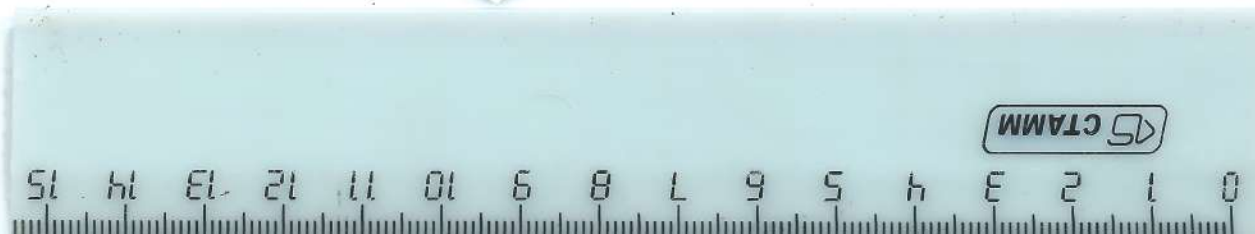

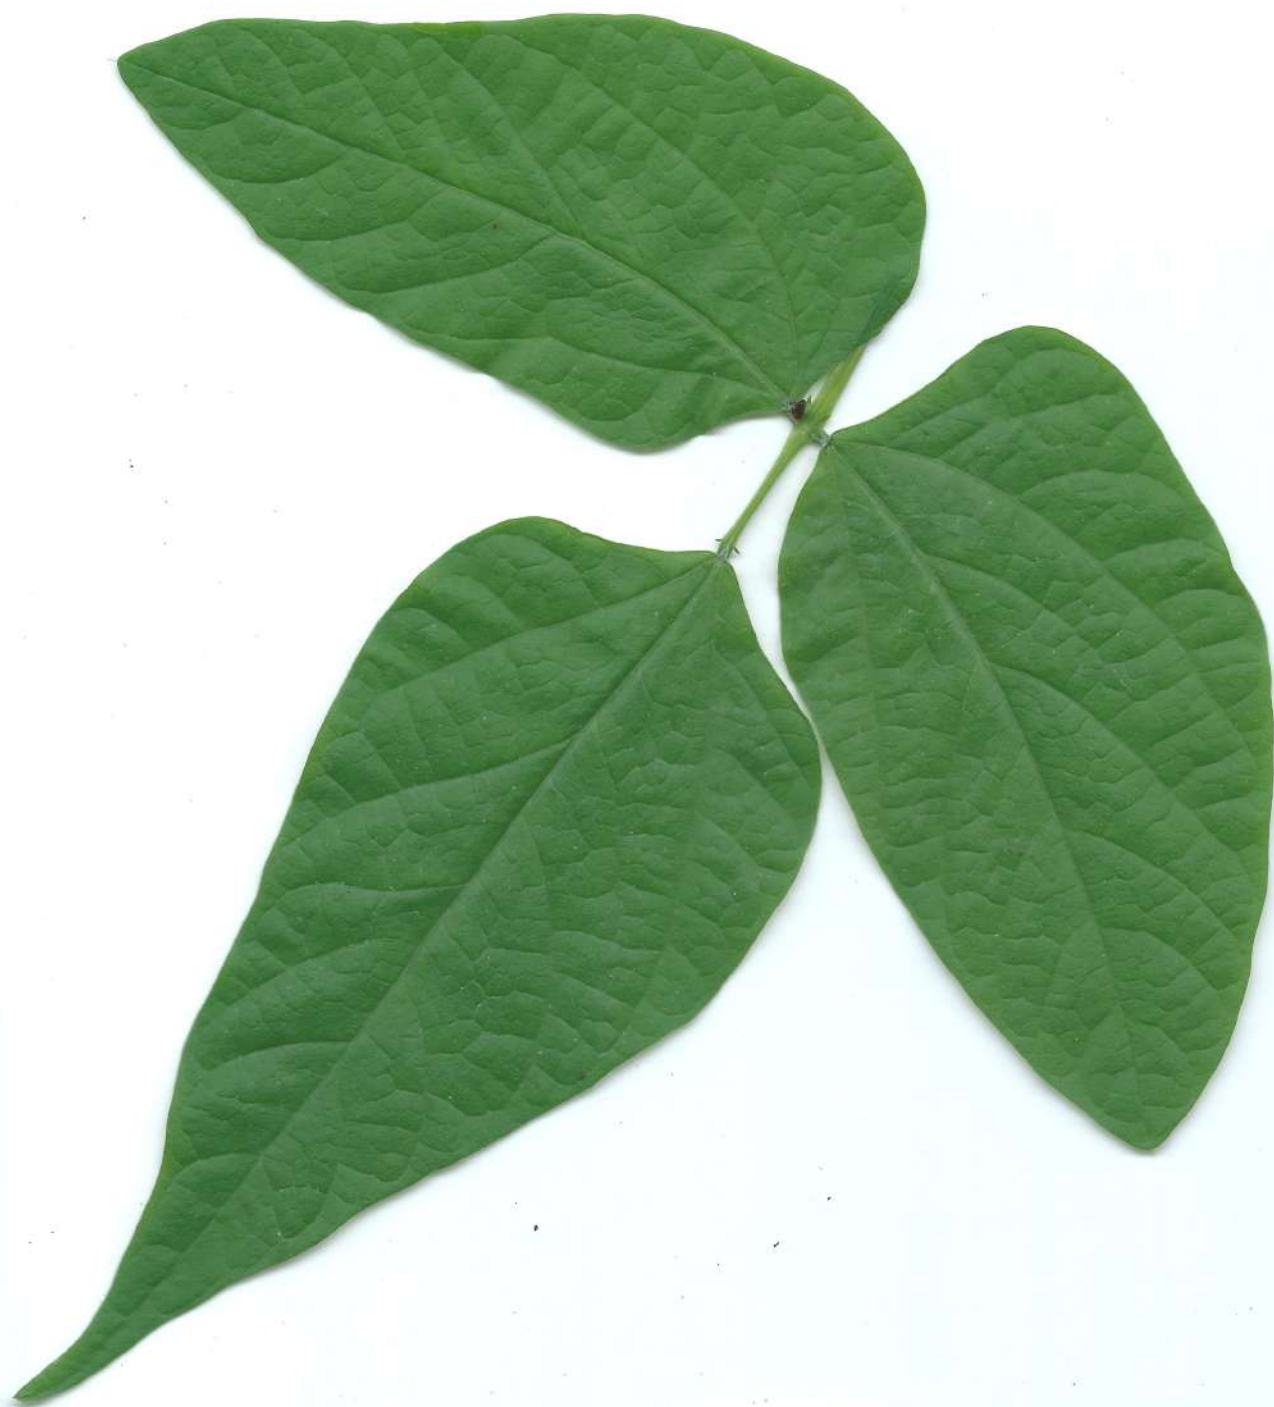

**13-2-3**

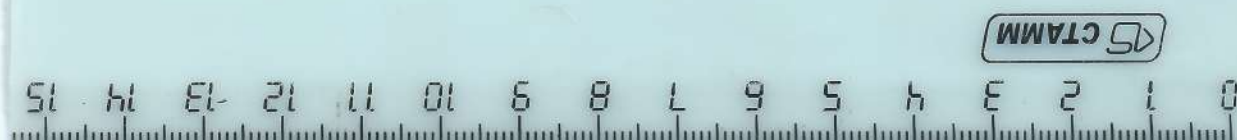

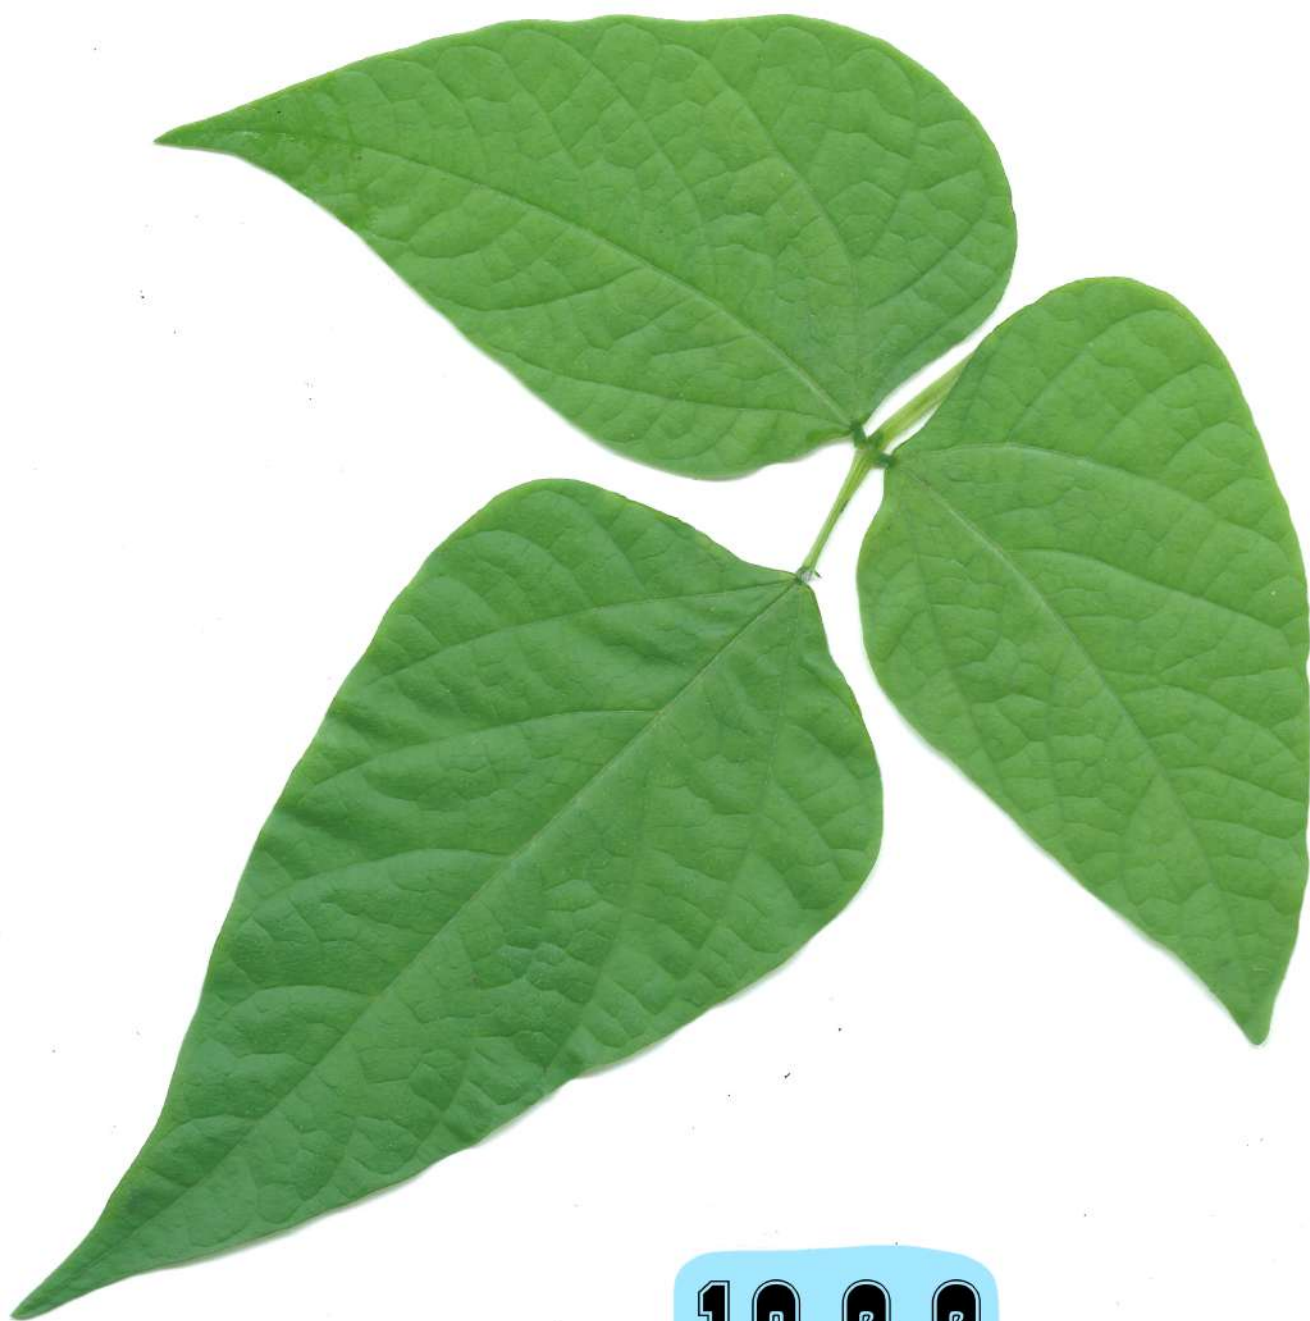

**13-2-2**



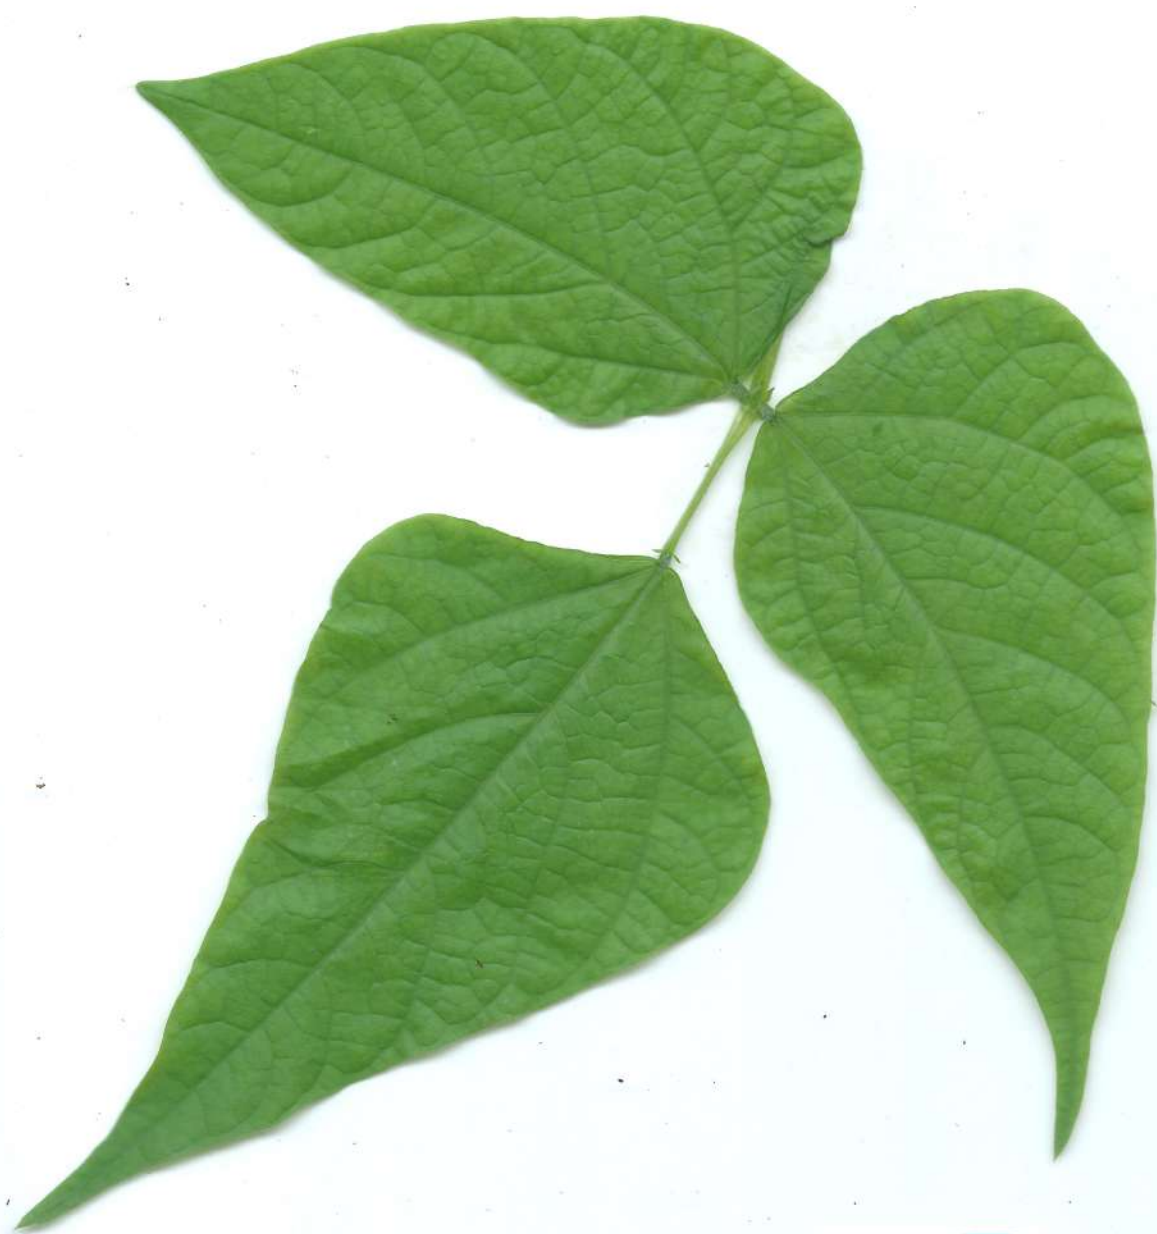

**13-2-1**

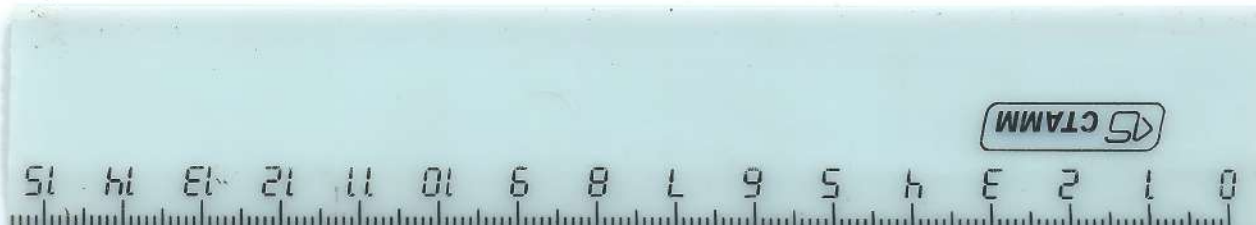



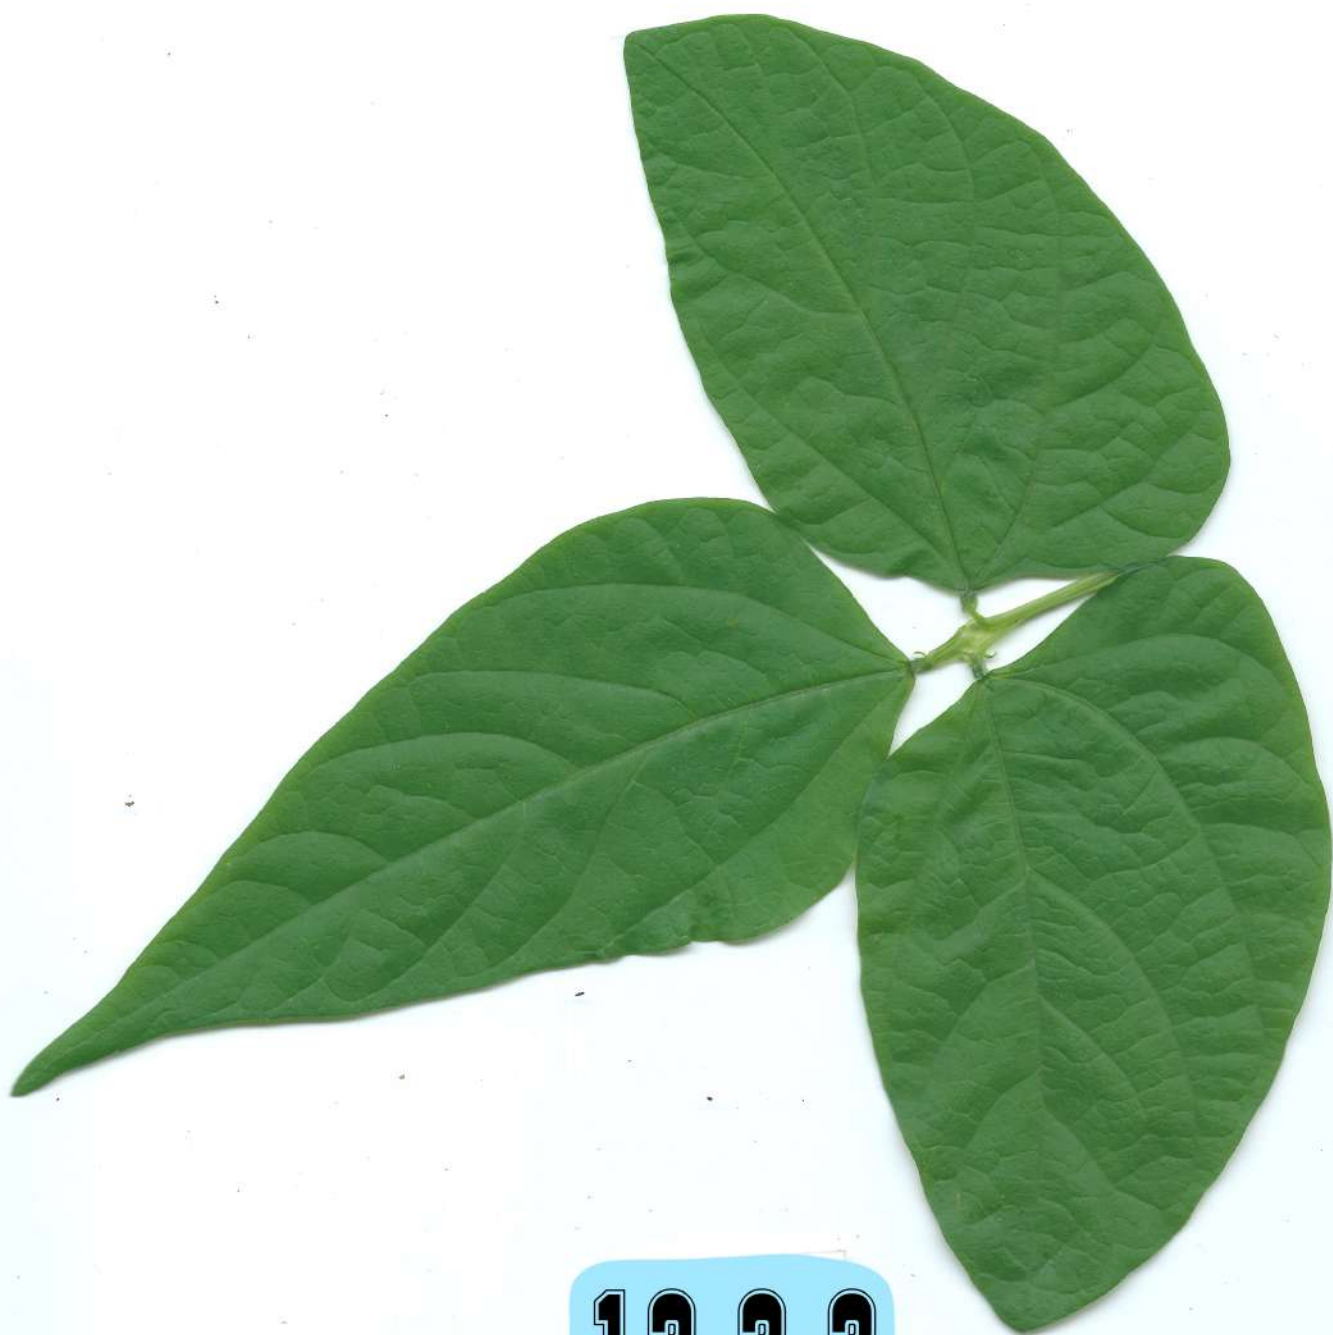

13-3-3

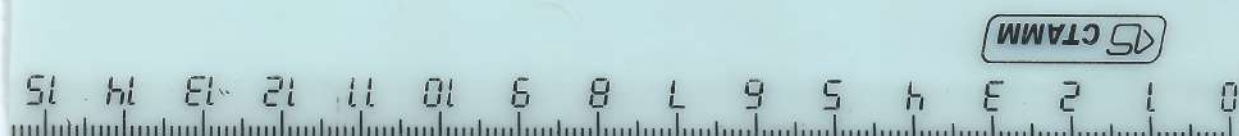

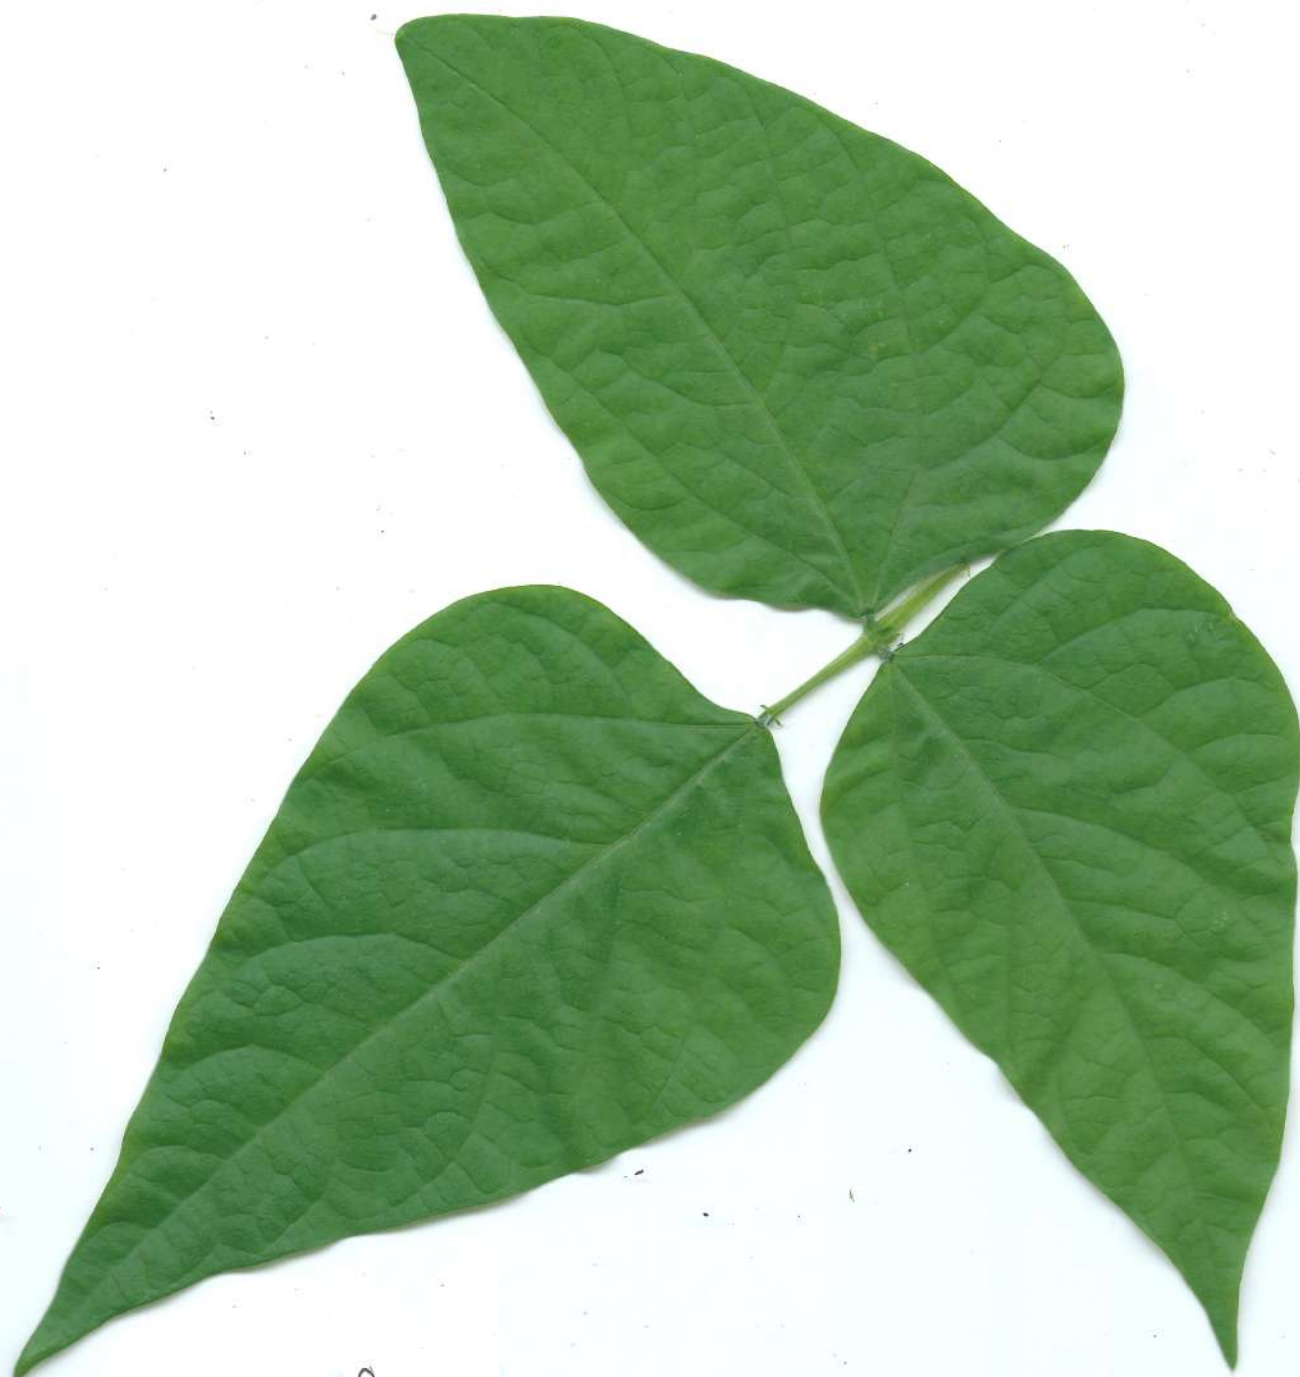

A  
**13-3-2**

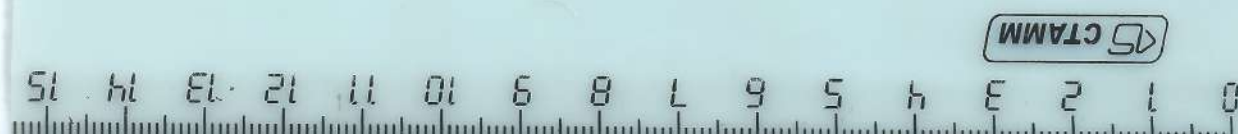

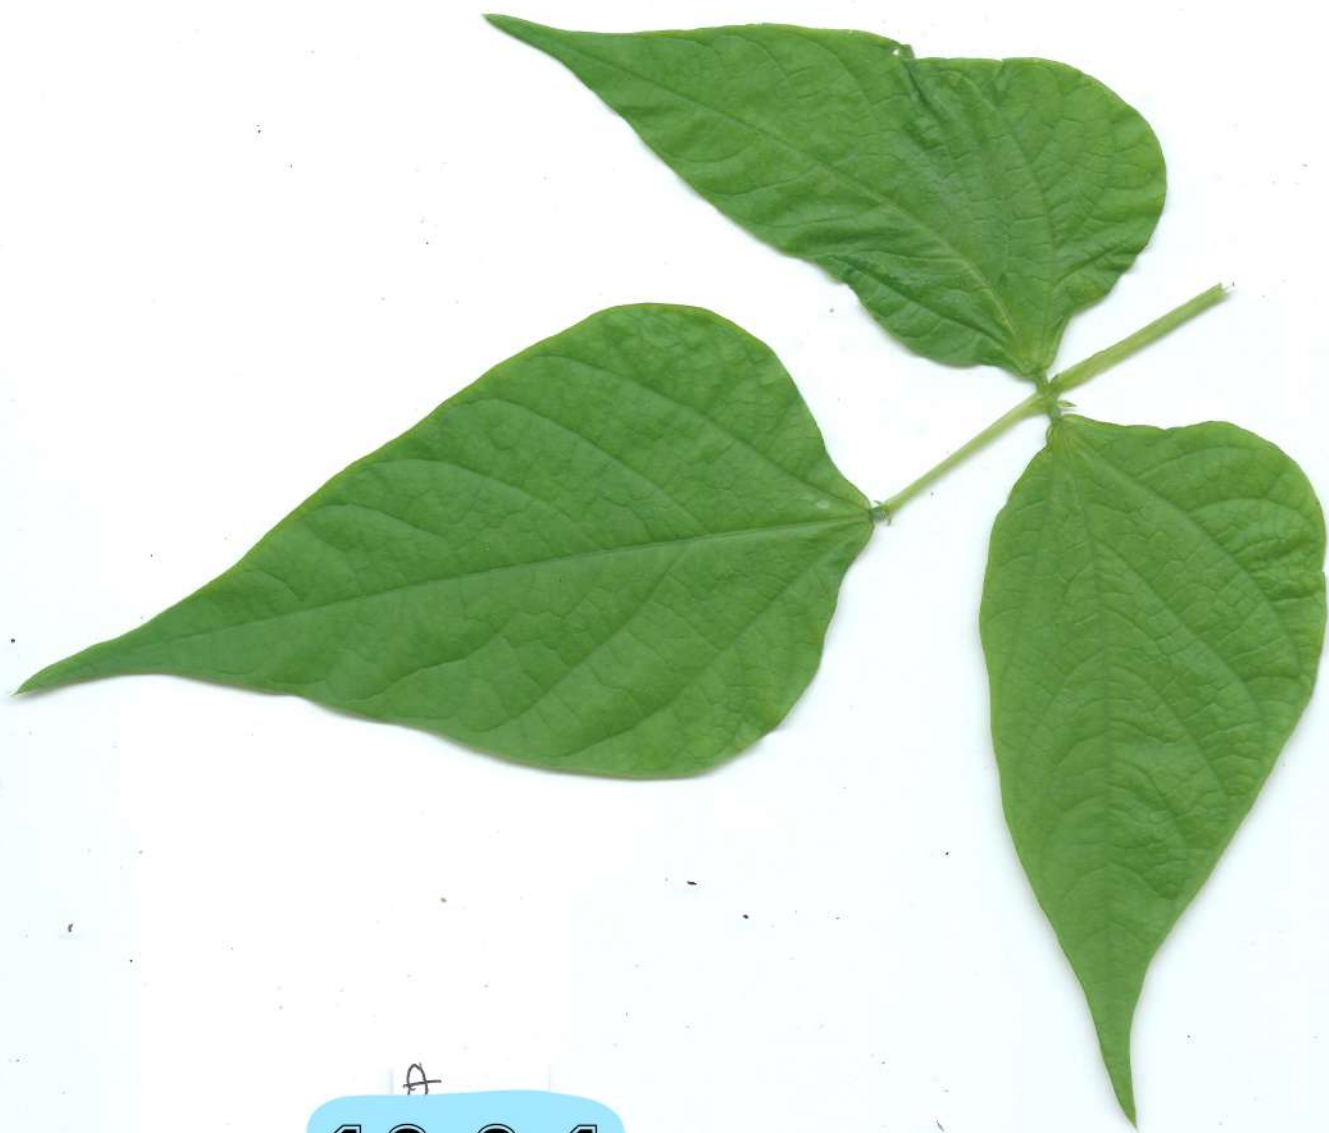

A  
**13-3-1**

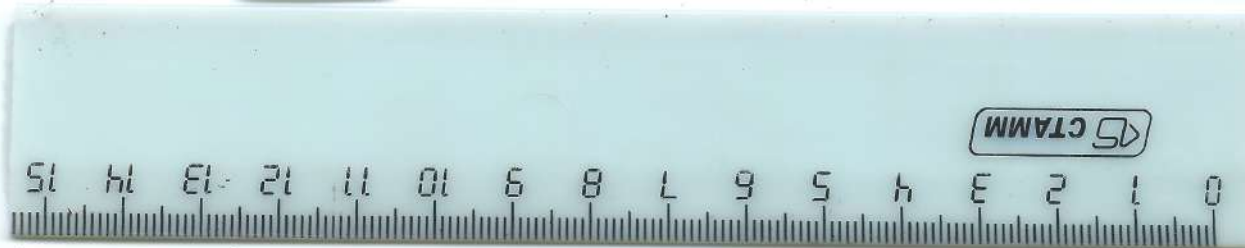

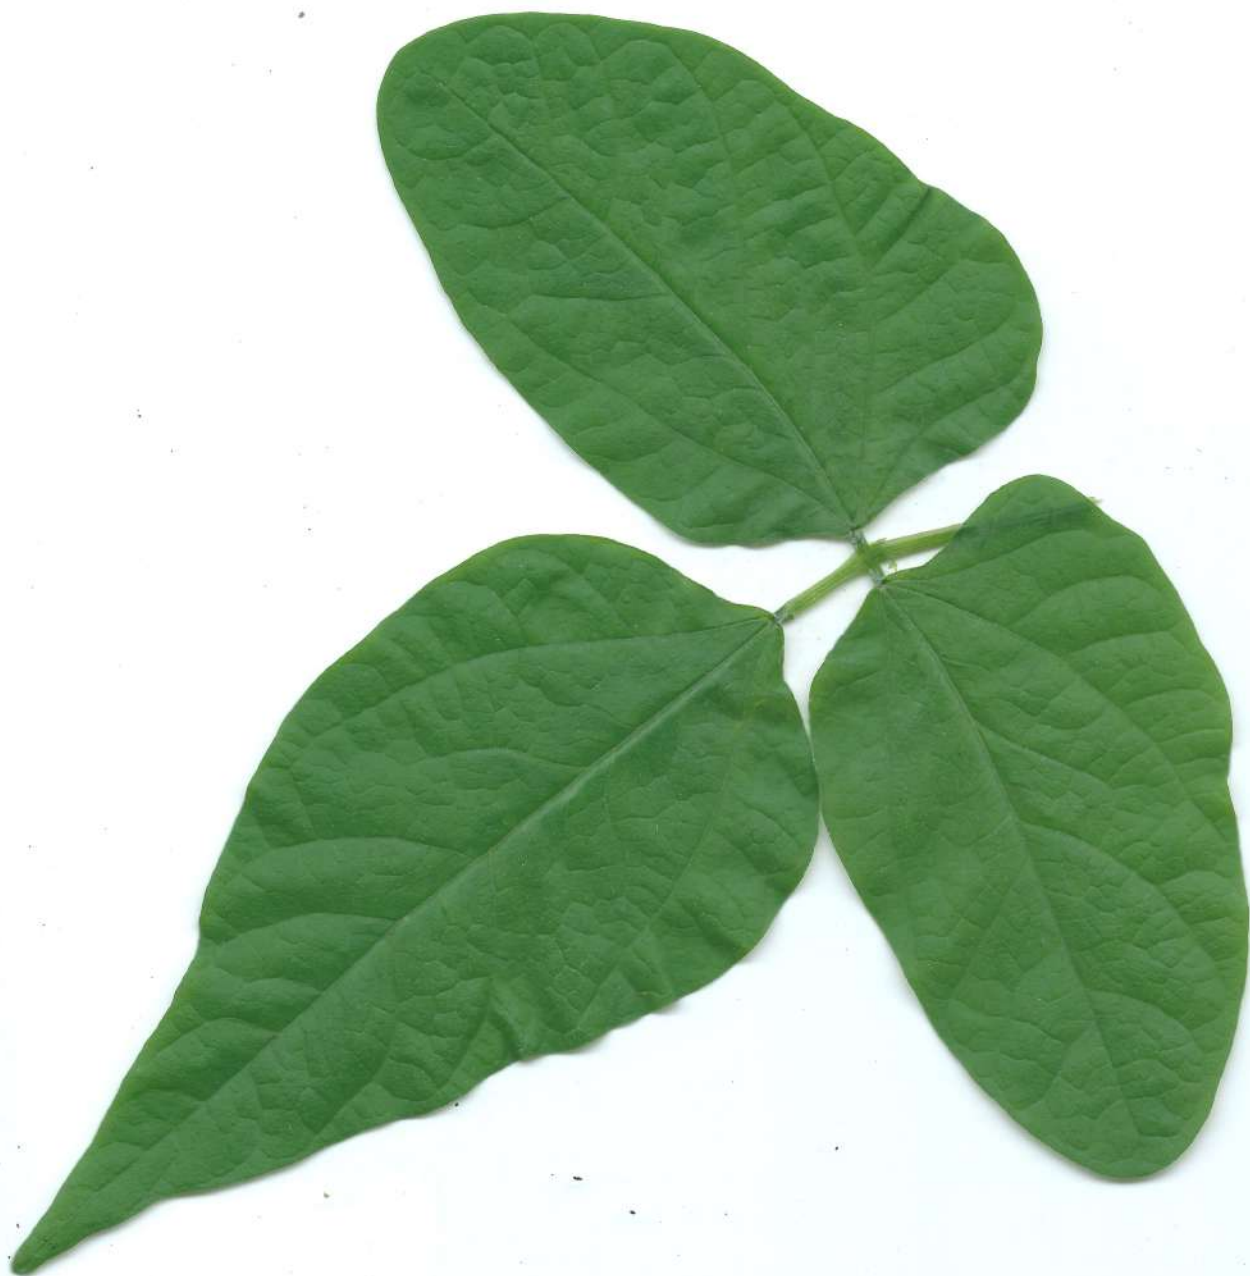

**13-4-3**

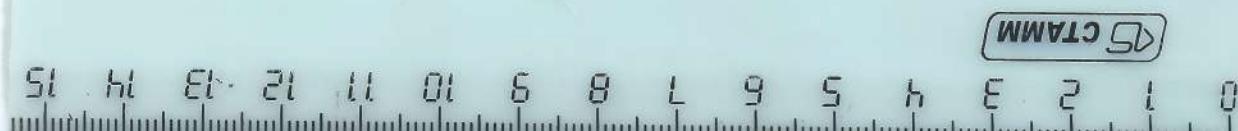



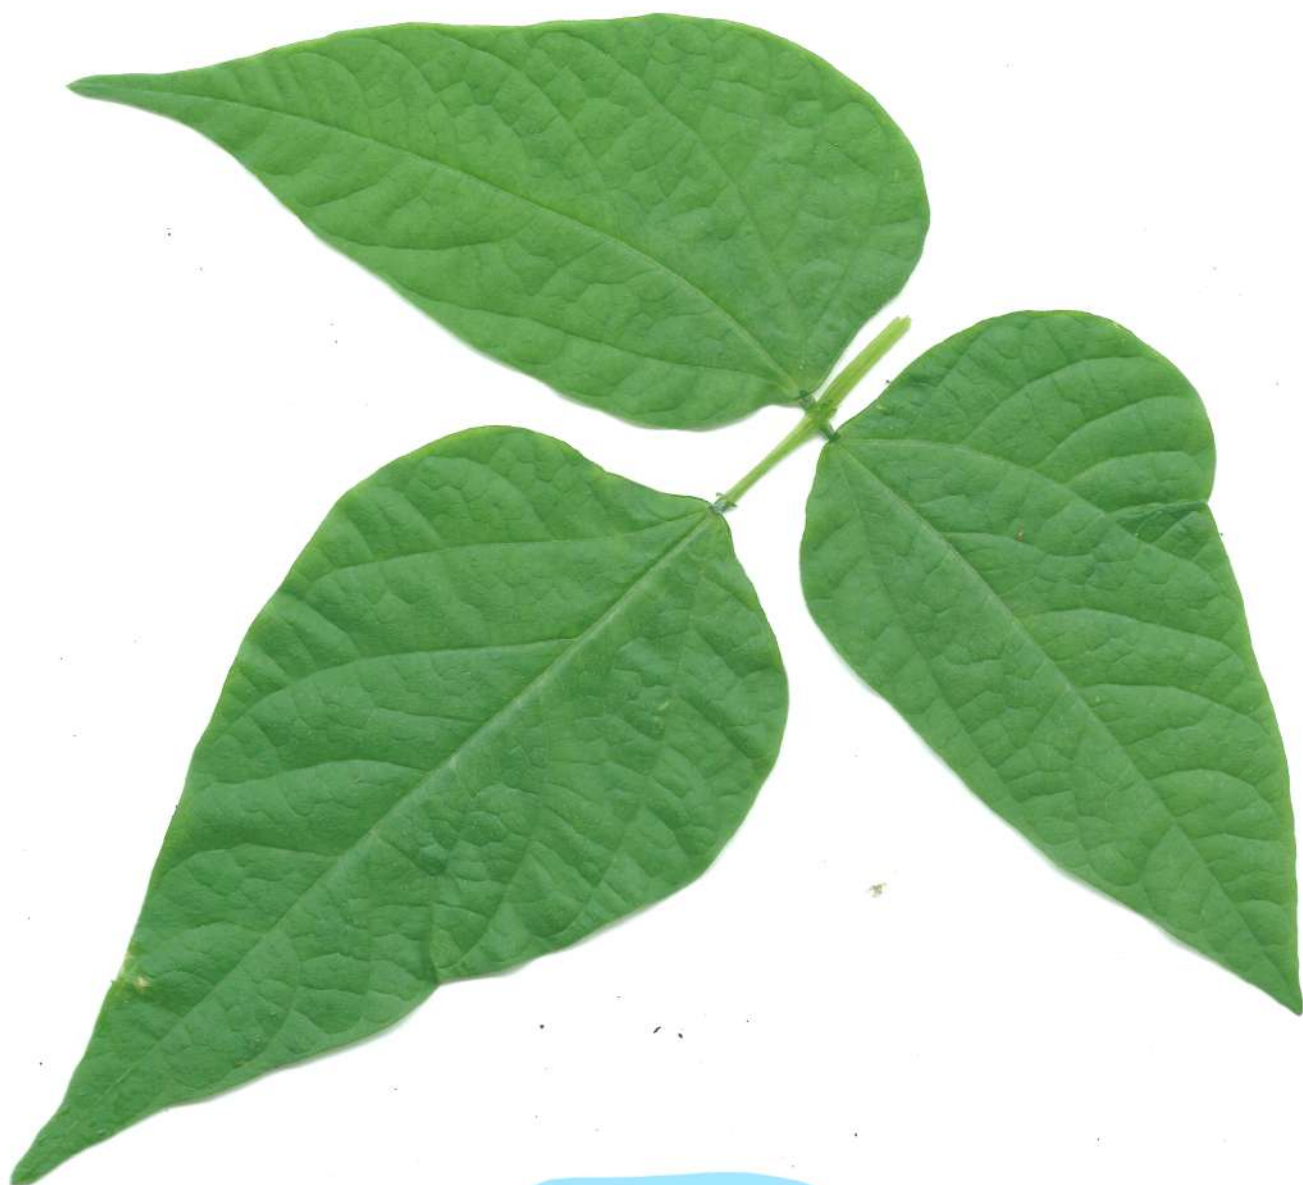

**13-4-2**

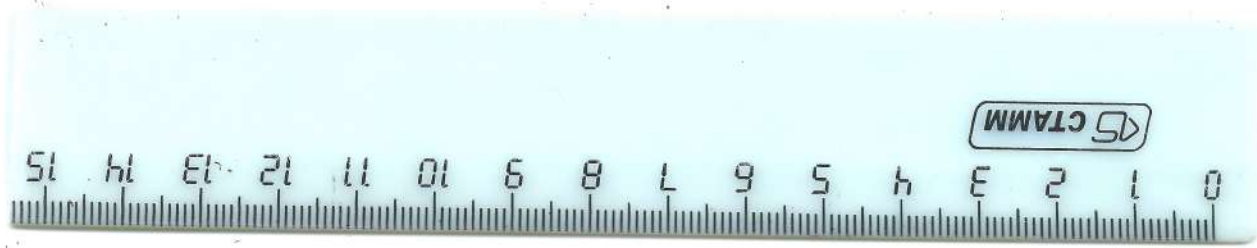

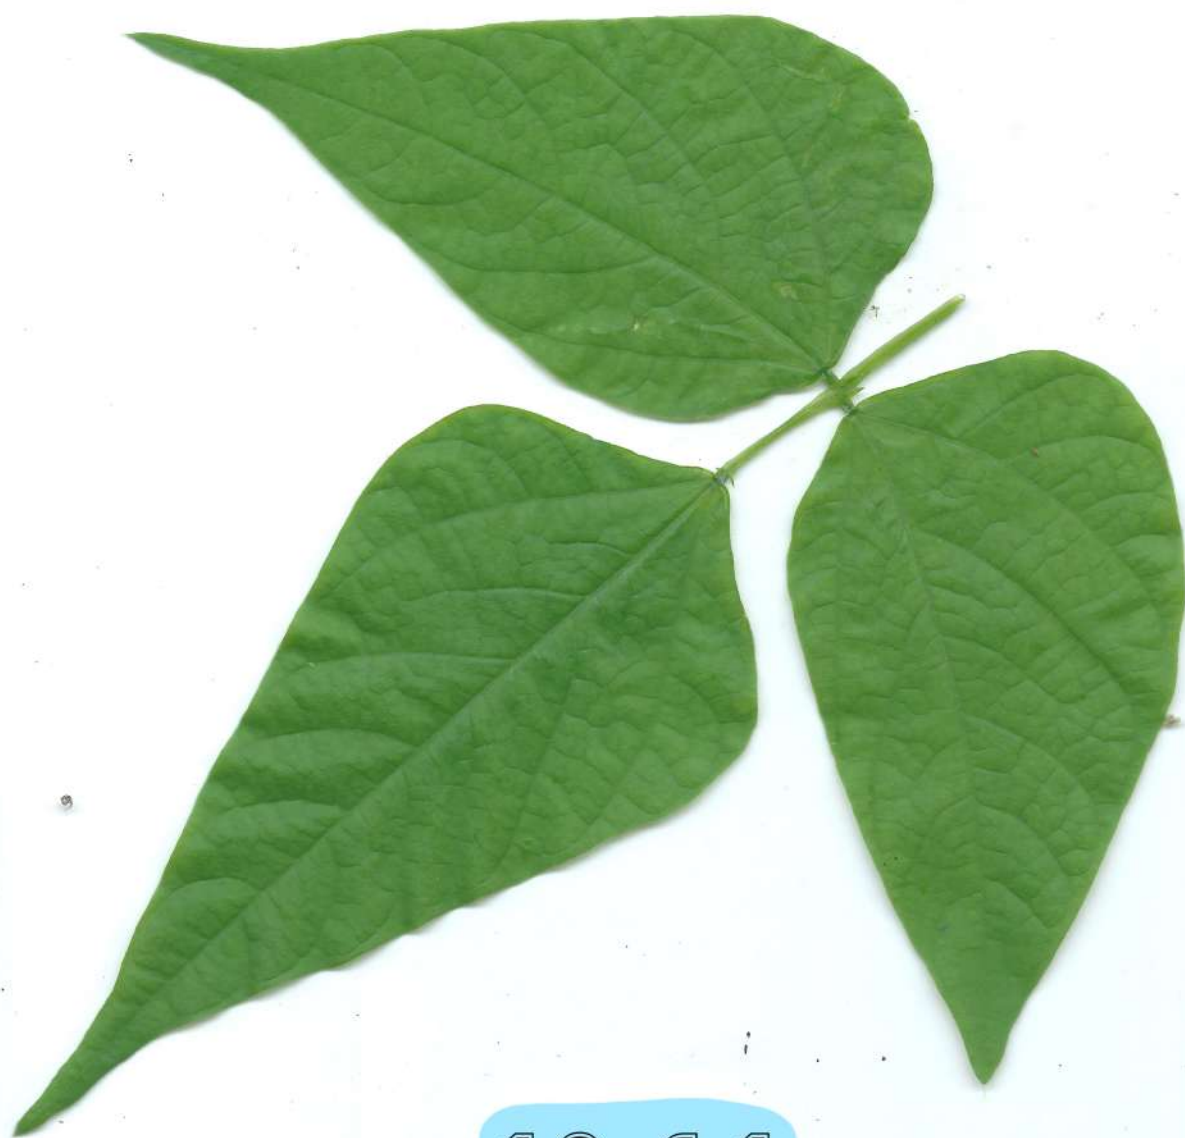

**13-4-1**

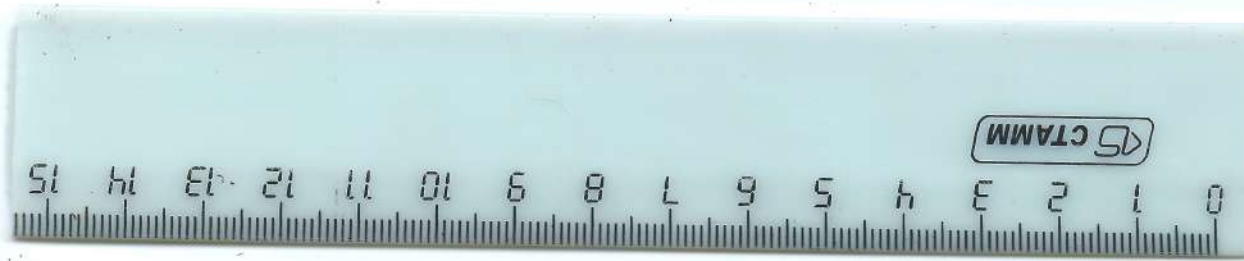

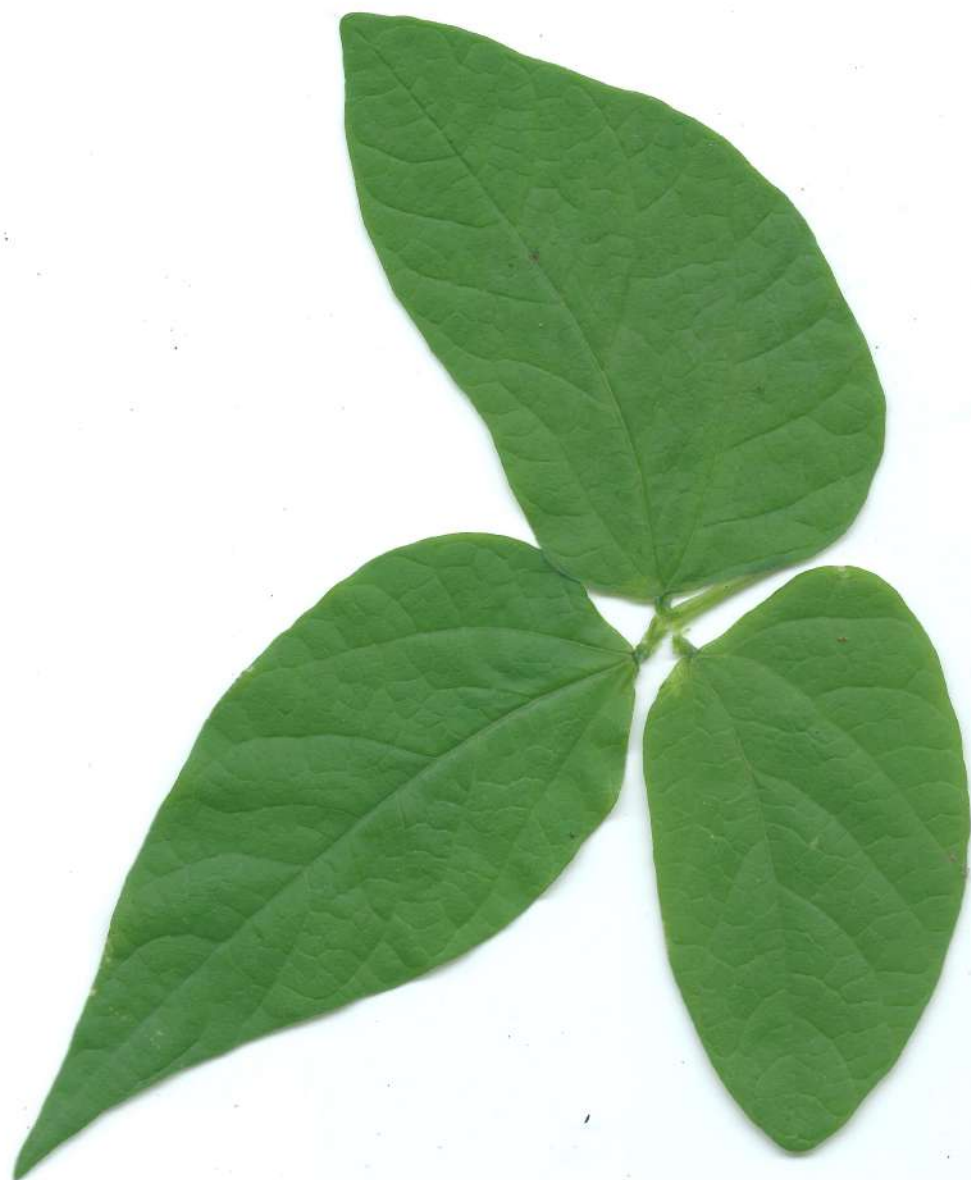

**13-5-3**

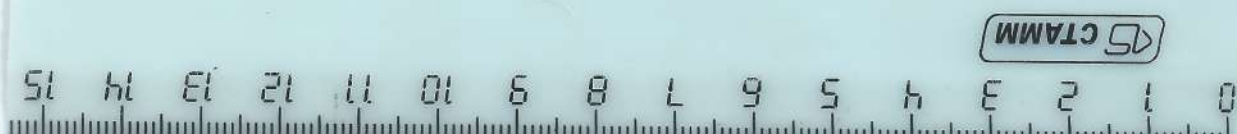

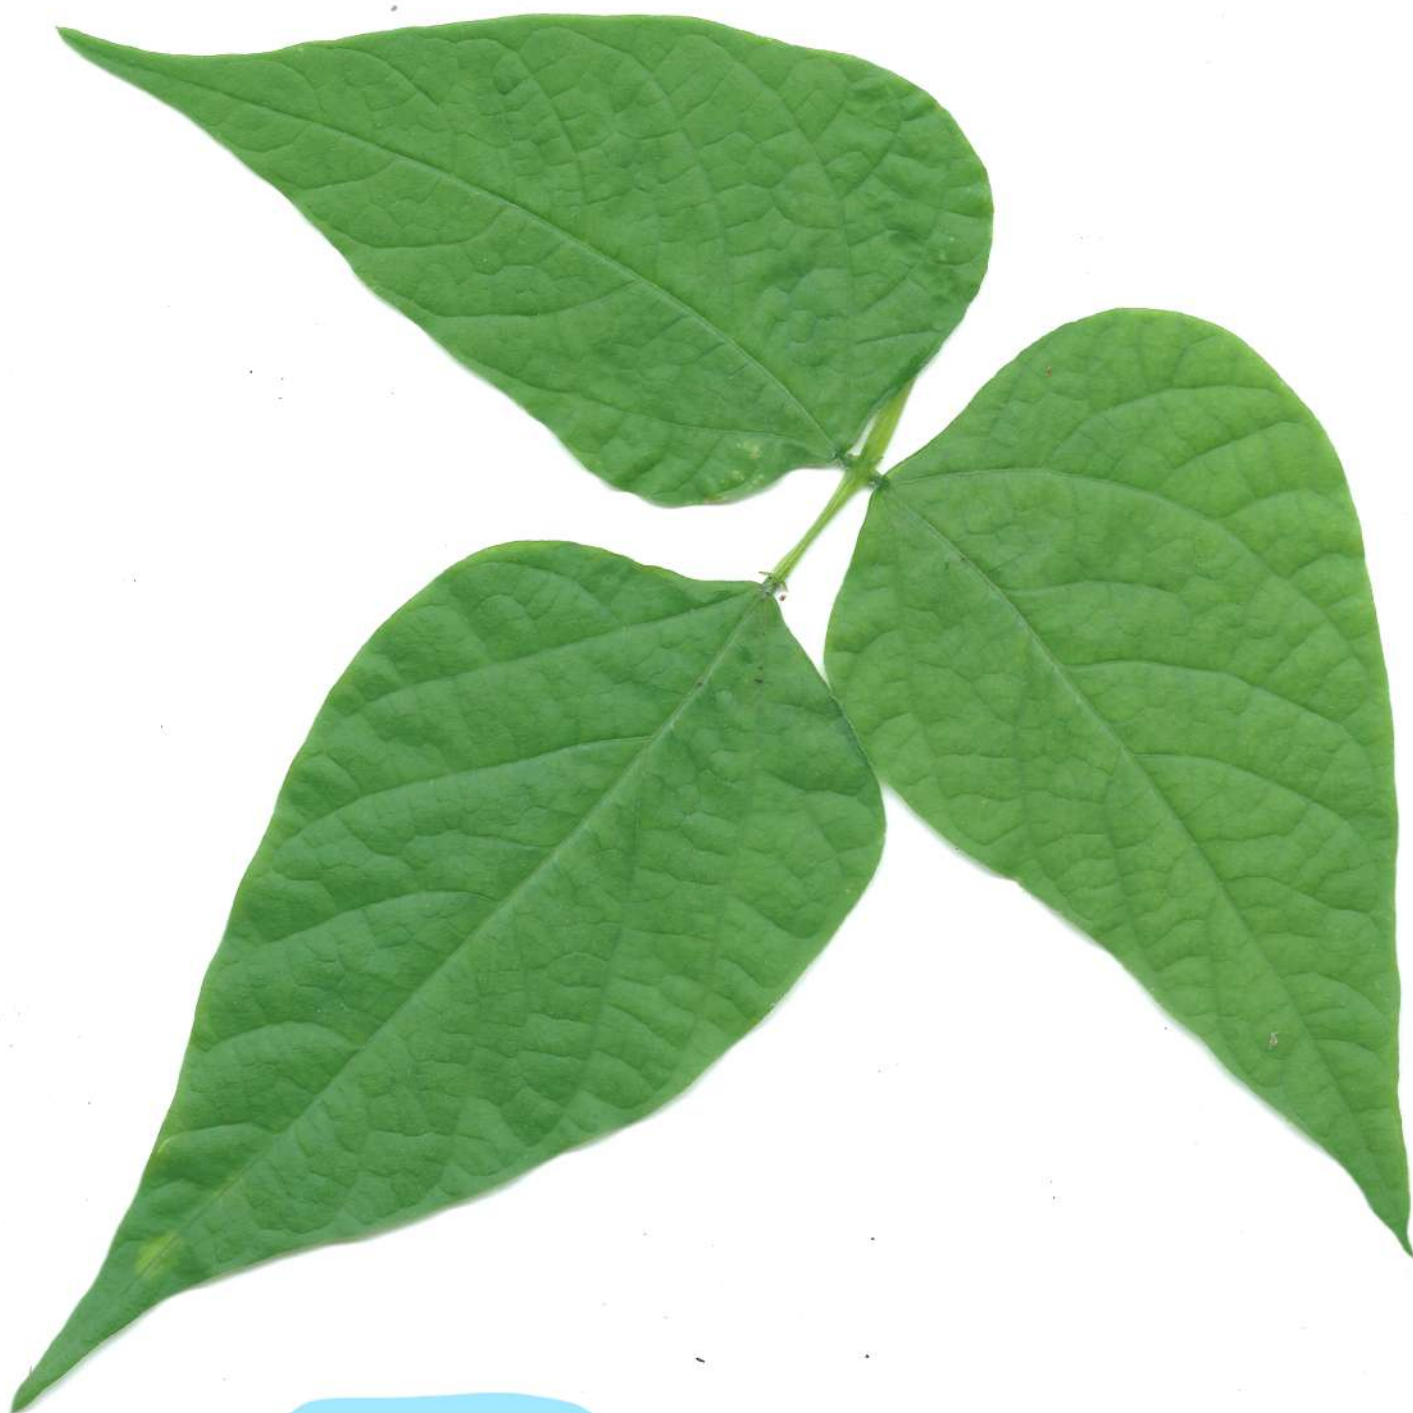

**13-5-2**

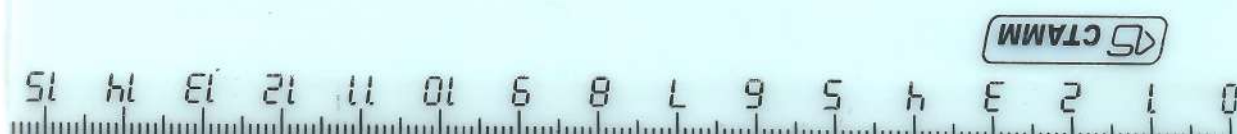



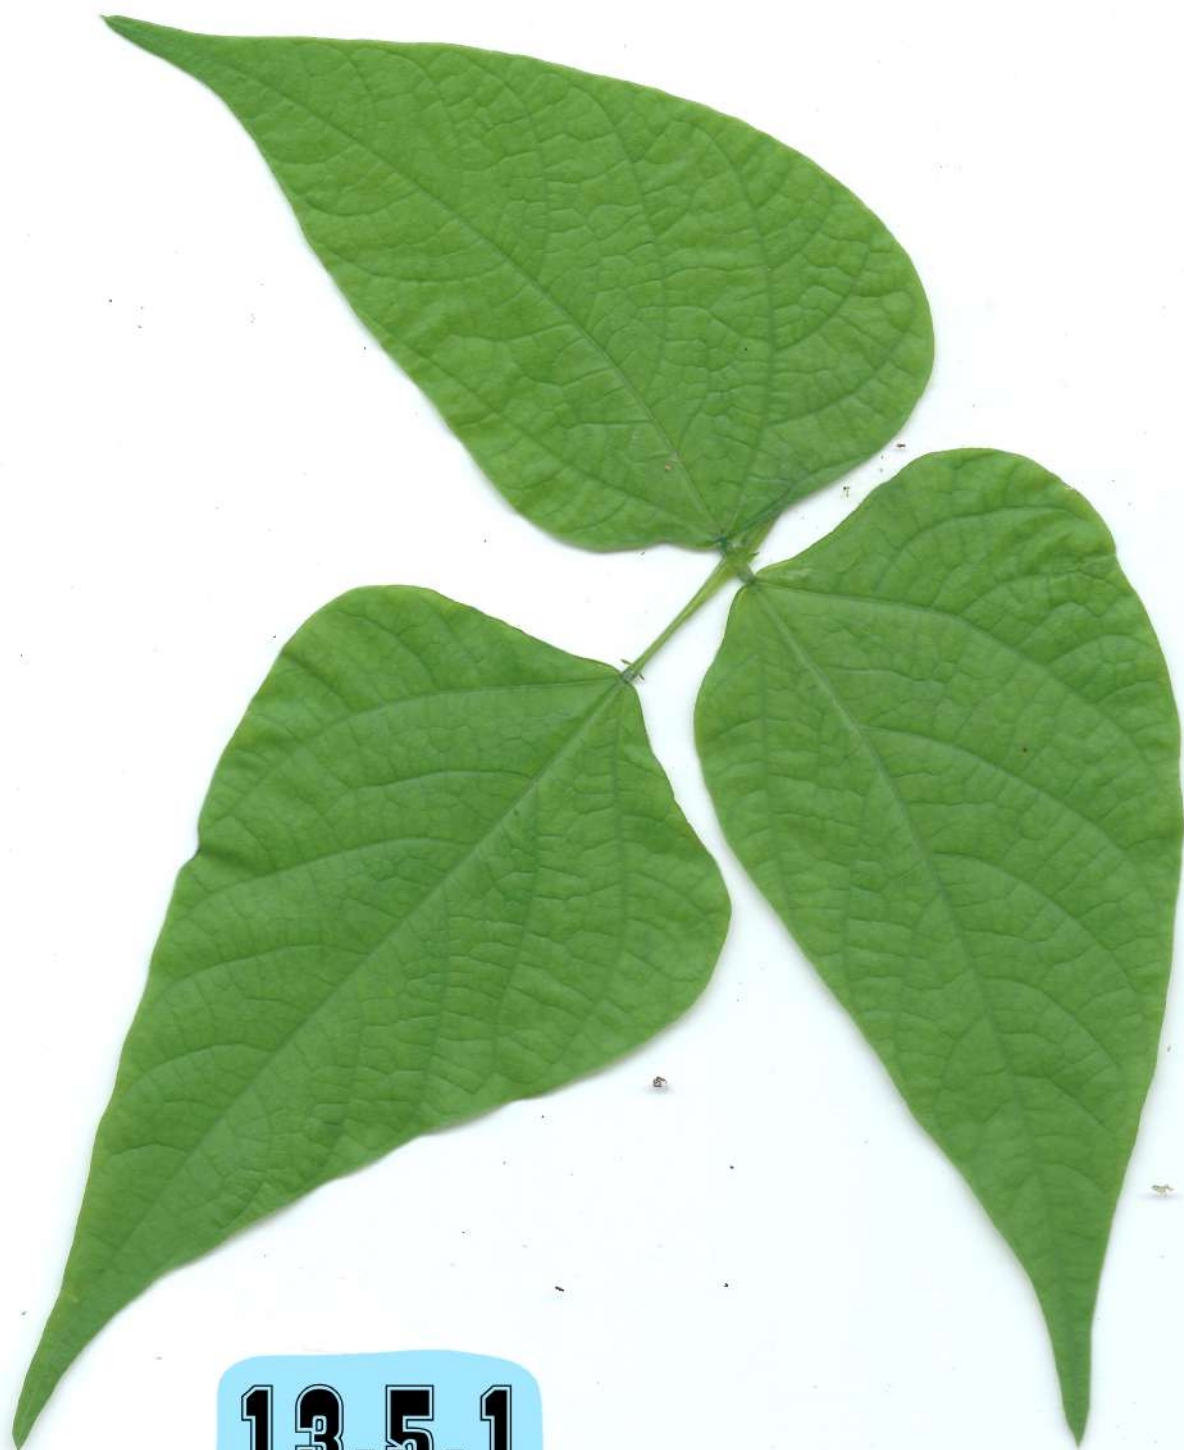

13-5-1

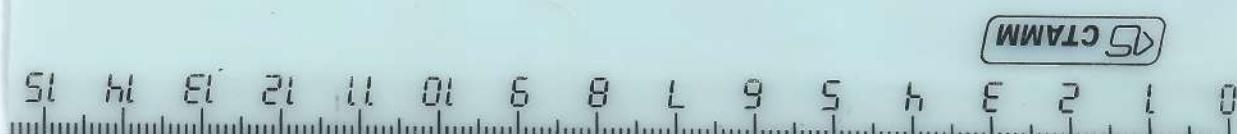

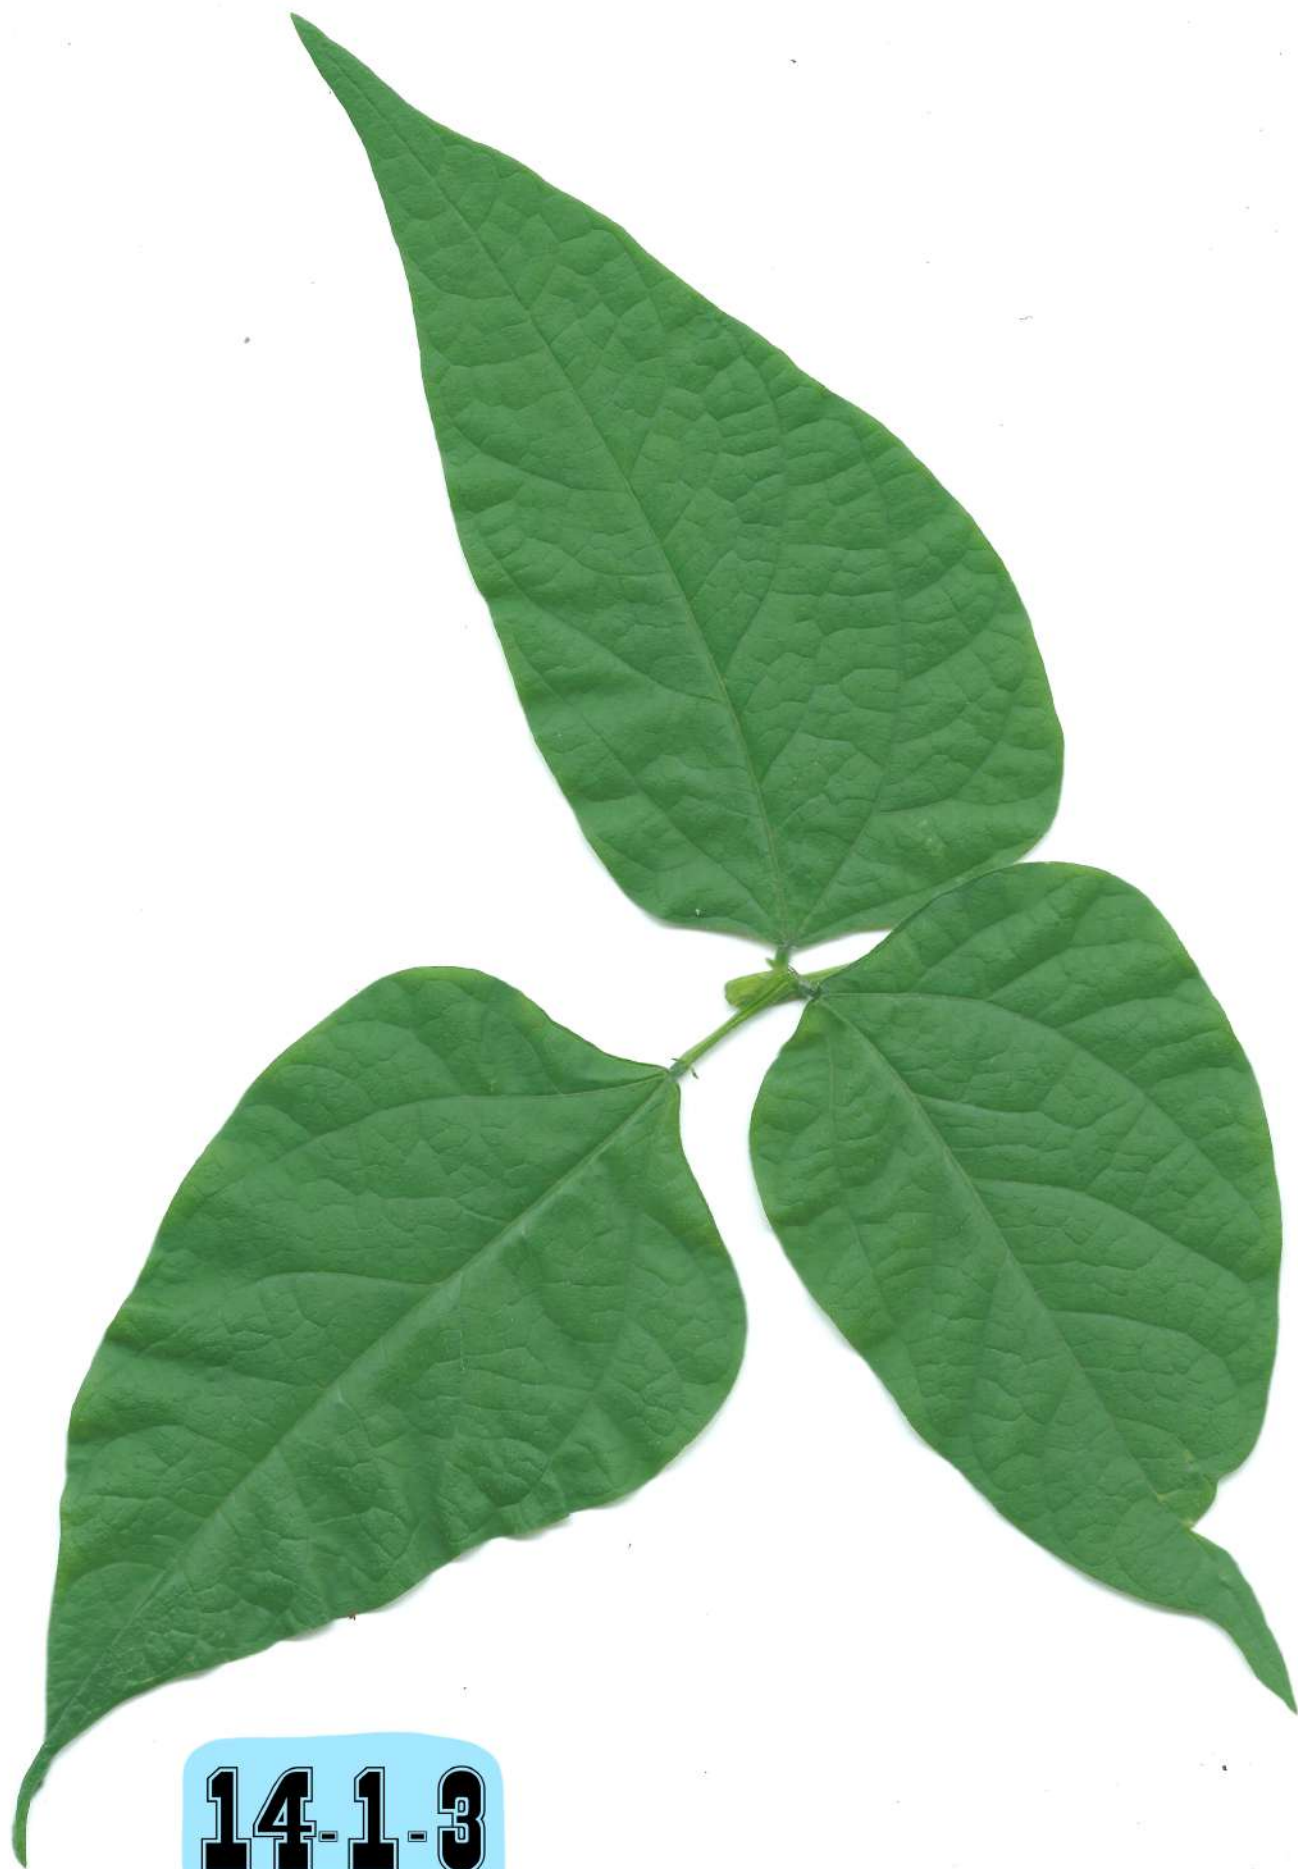

**14-1-3**

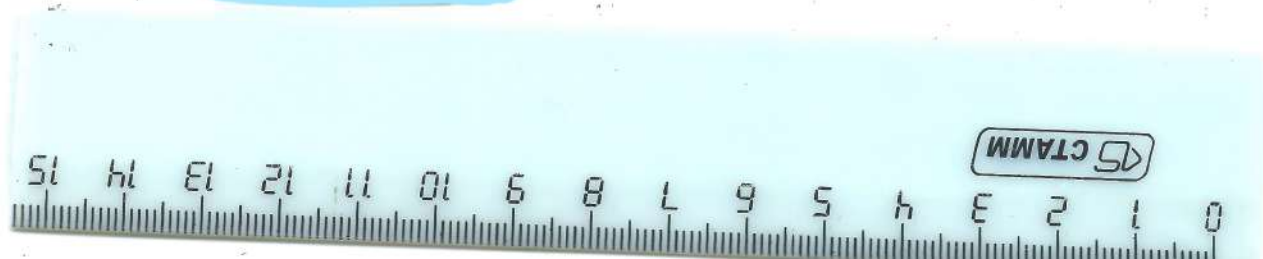

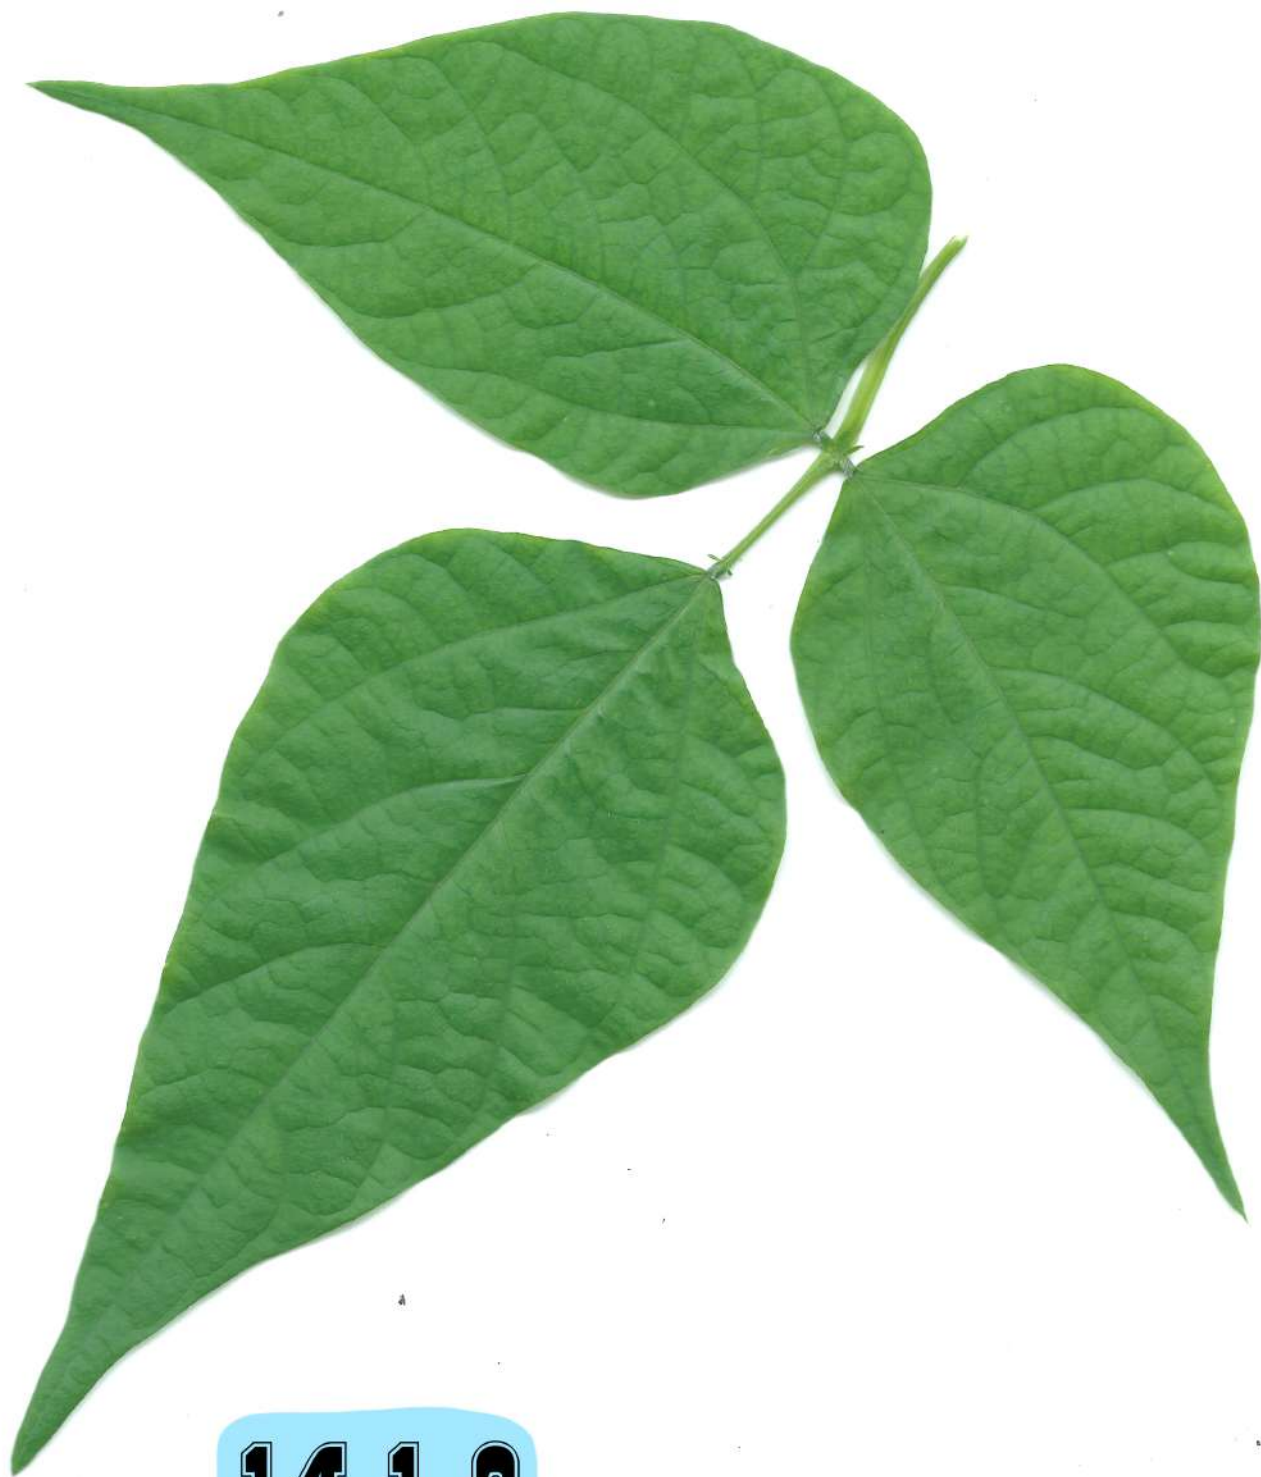

**14-1-2**

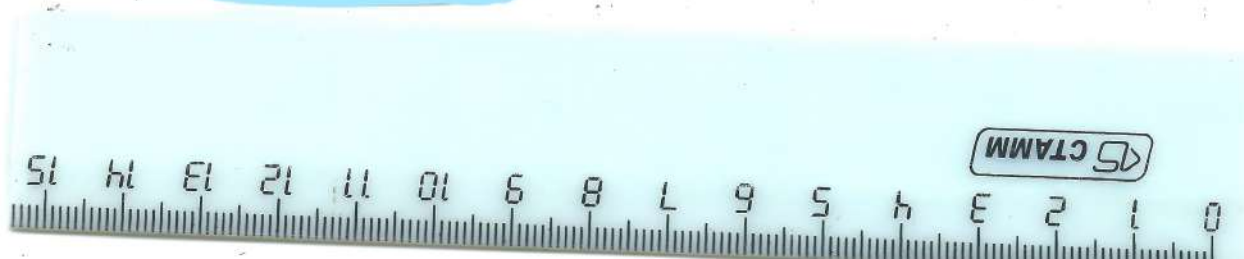



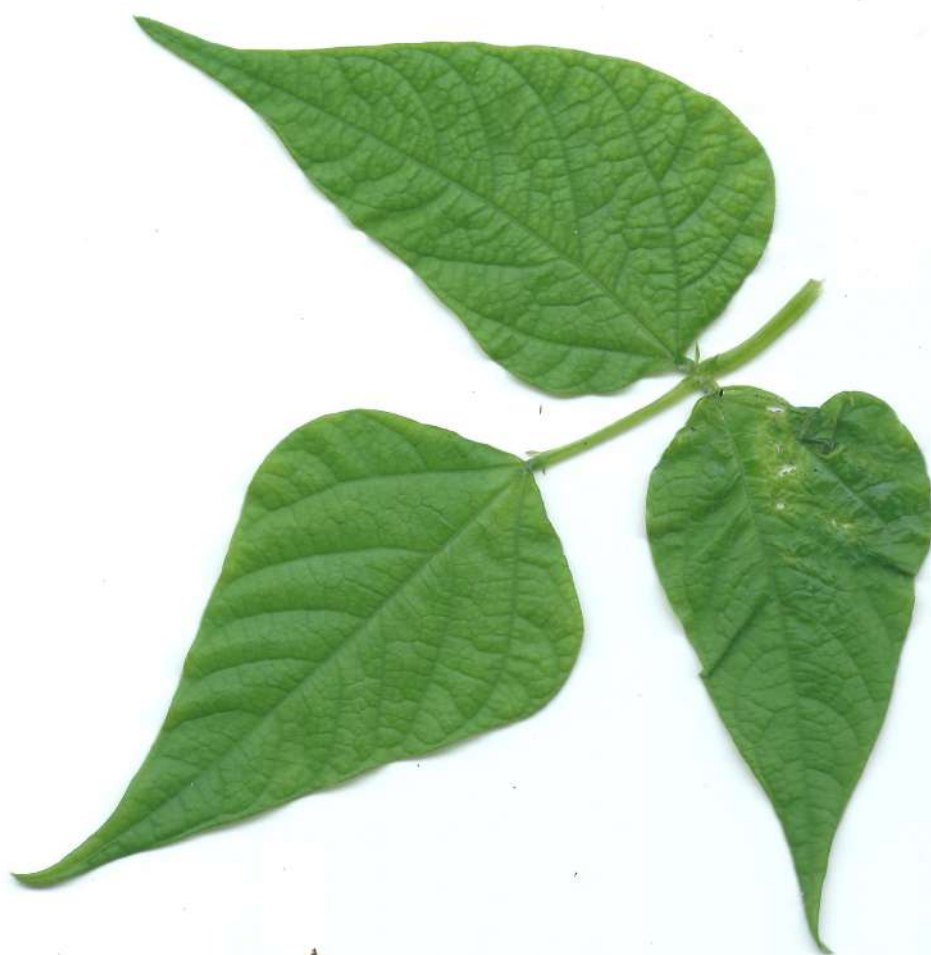

**14-1-1**

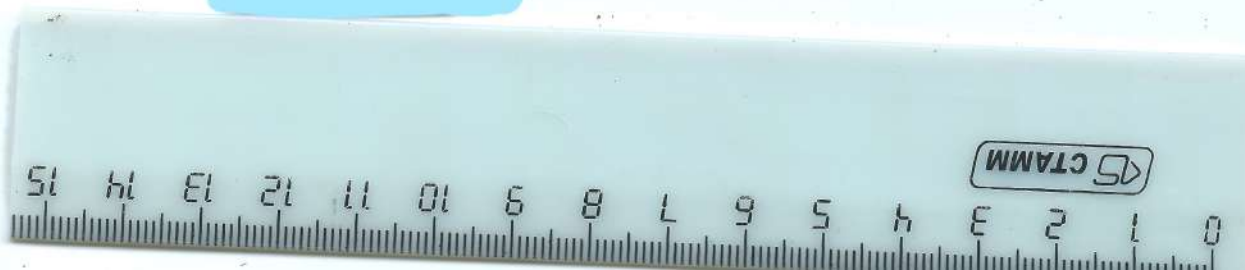



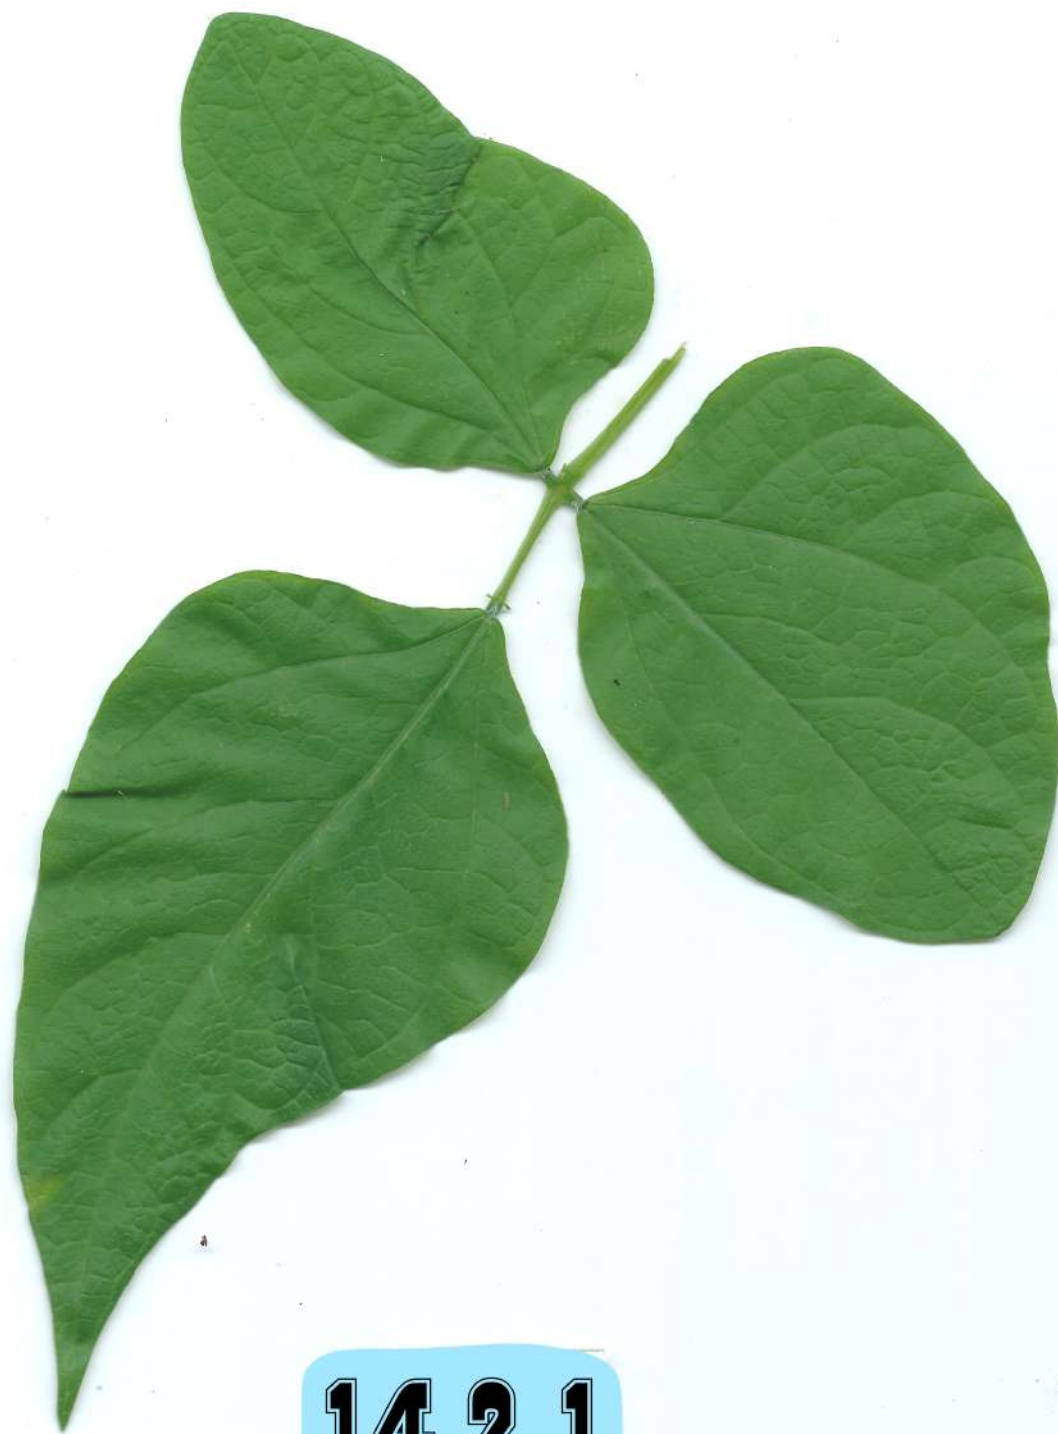

**14-2-1**

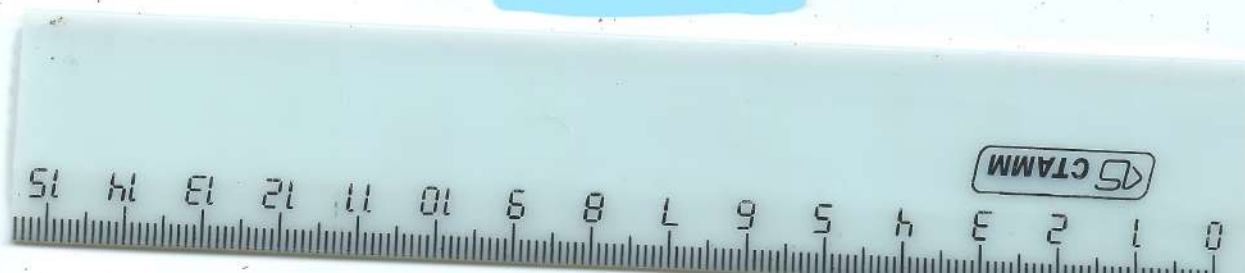

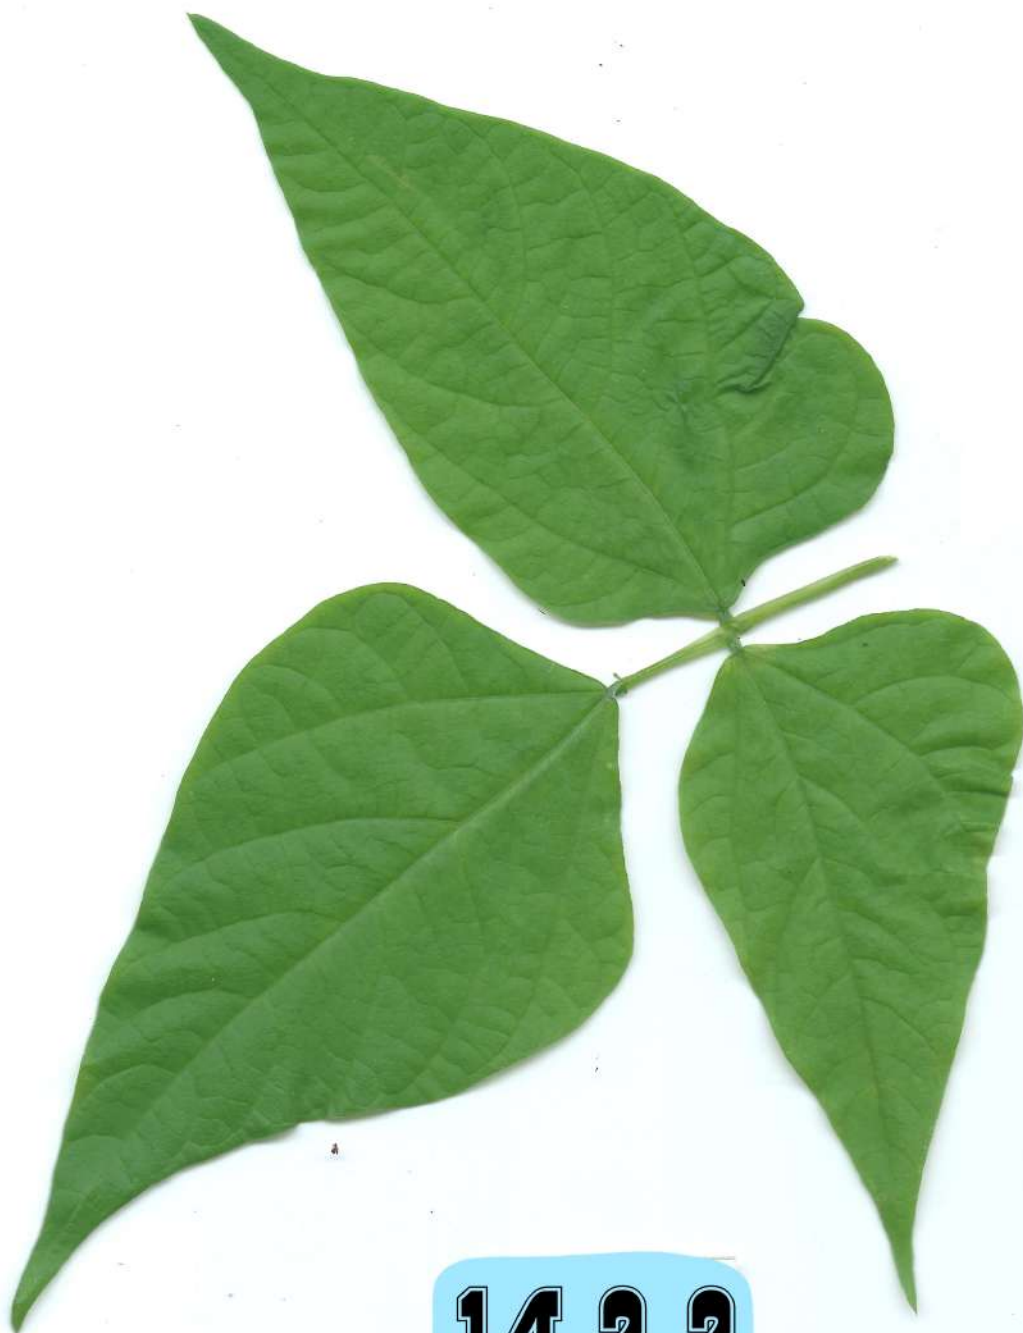

**14-2-2**

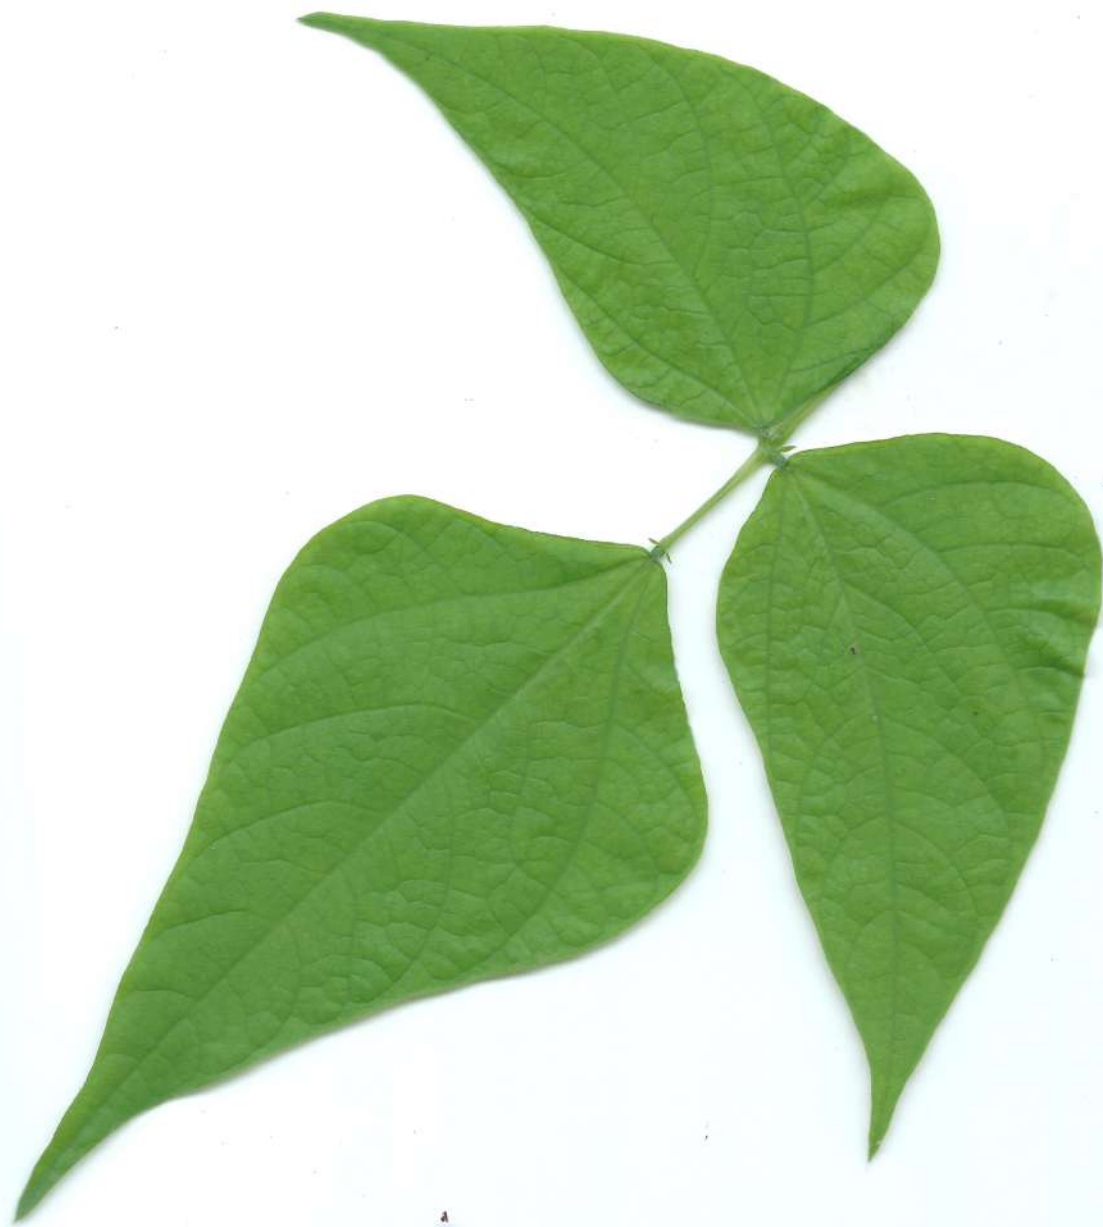

14-2-3

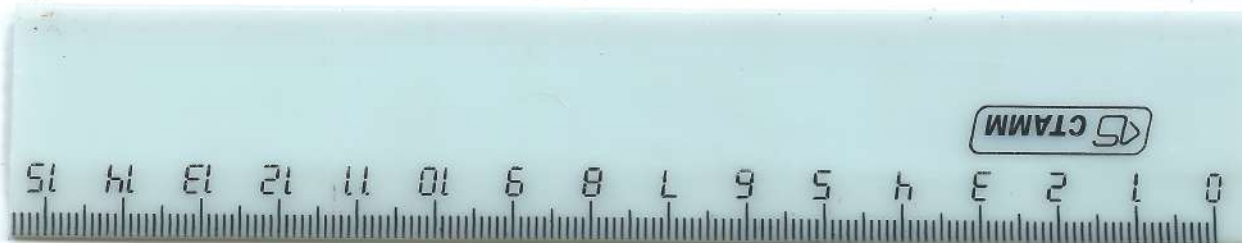

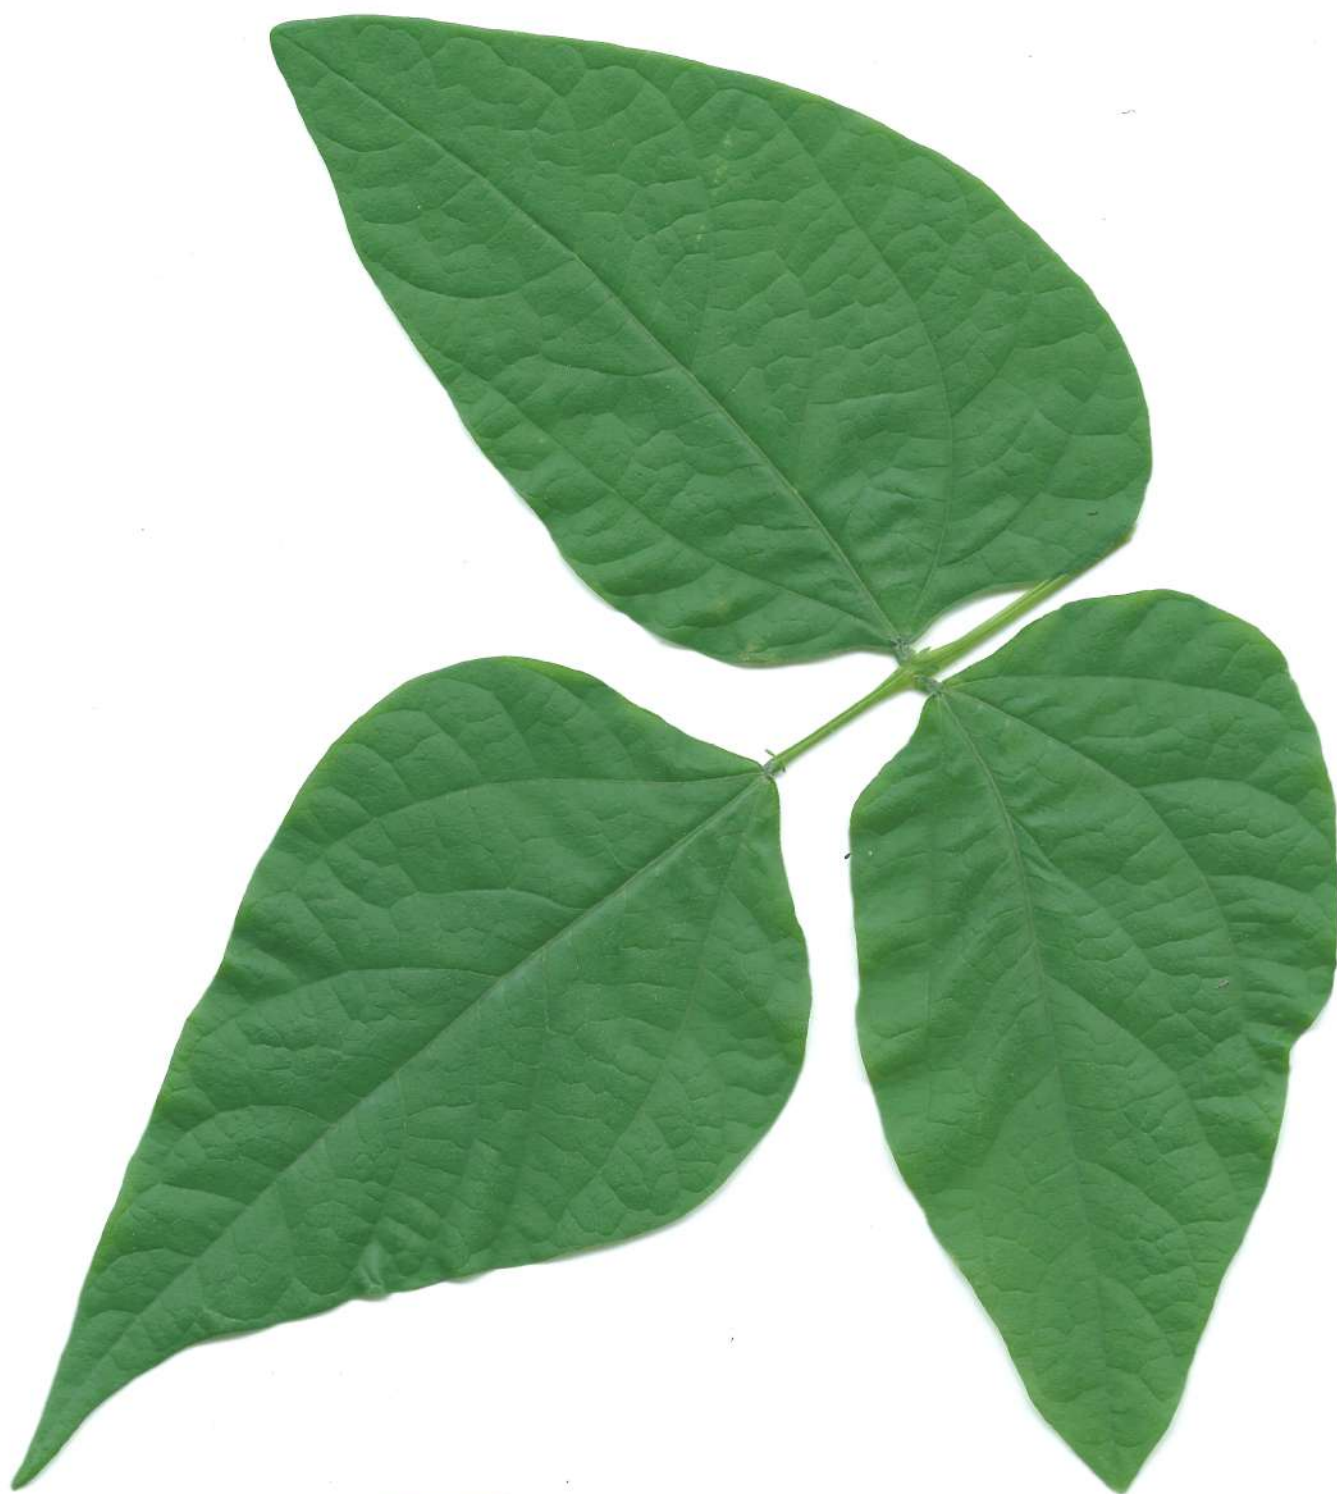

**14-3-1**

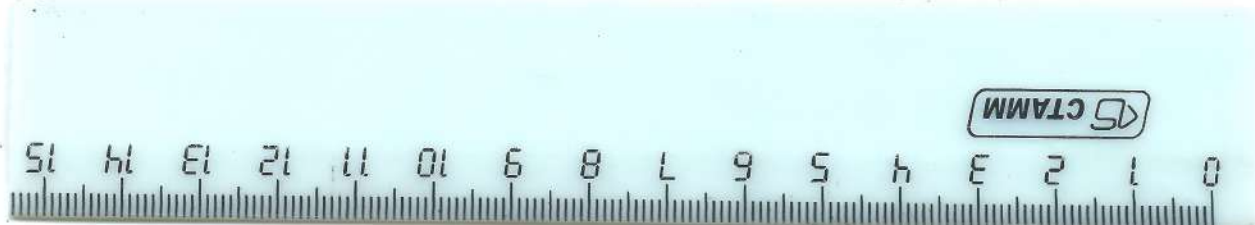



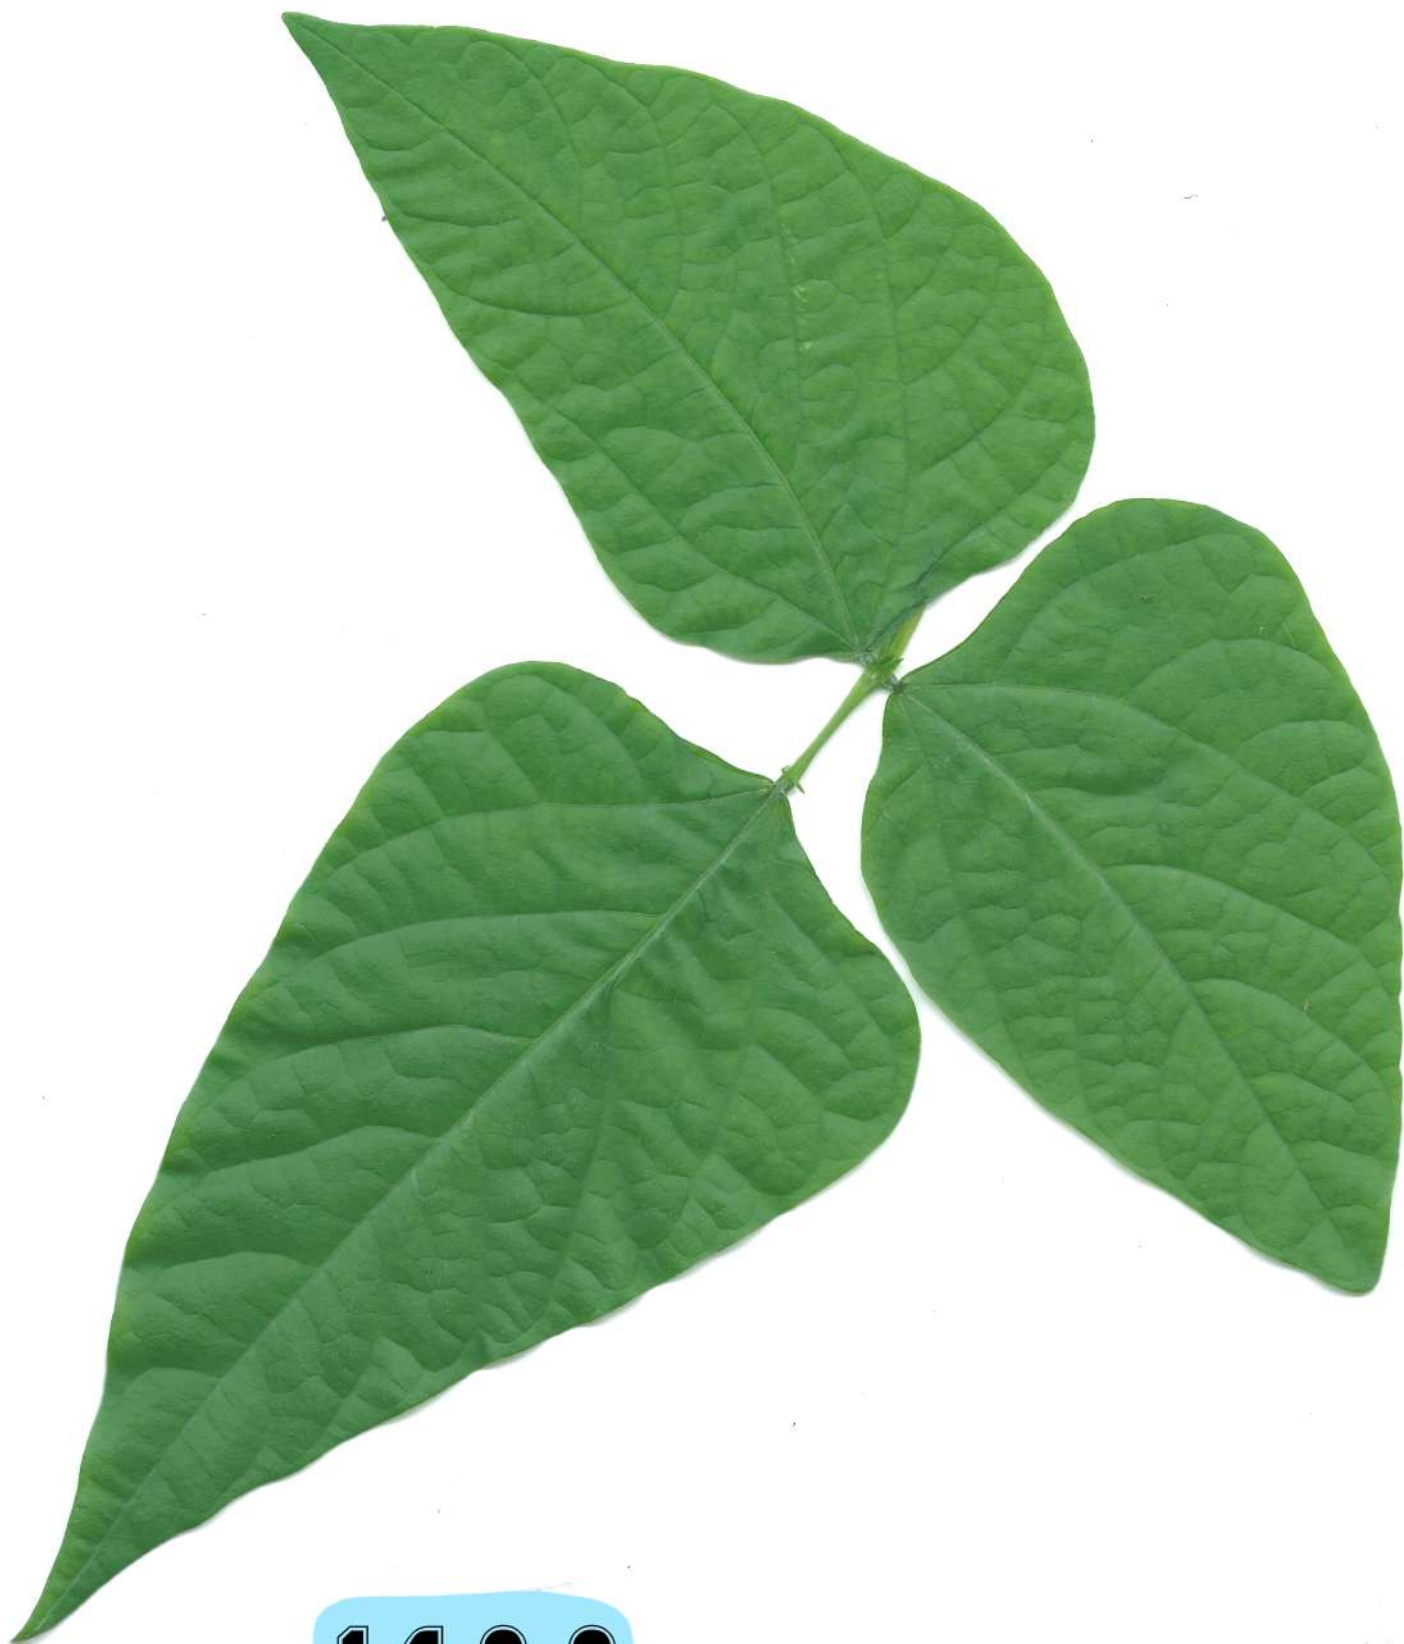

**14-3-3**

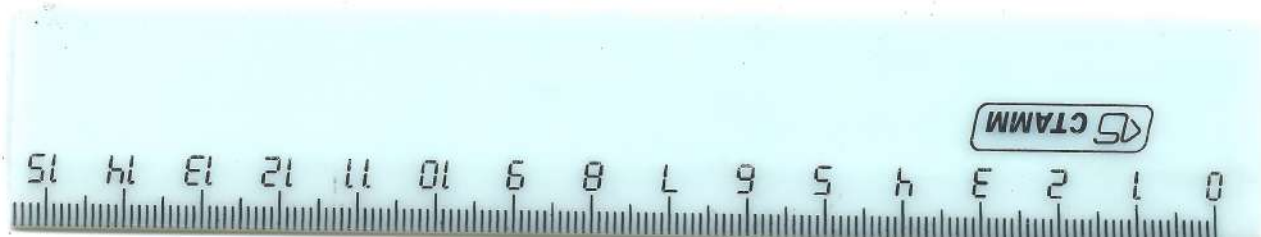

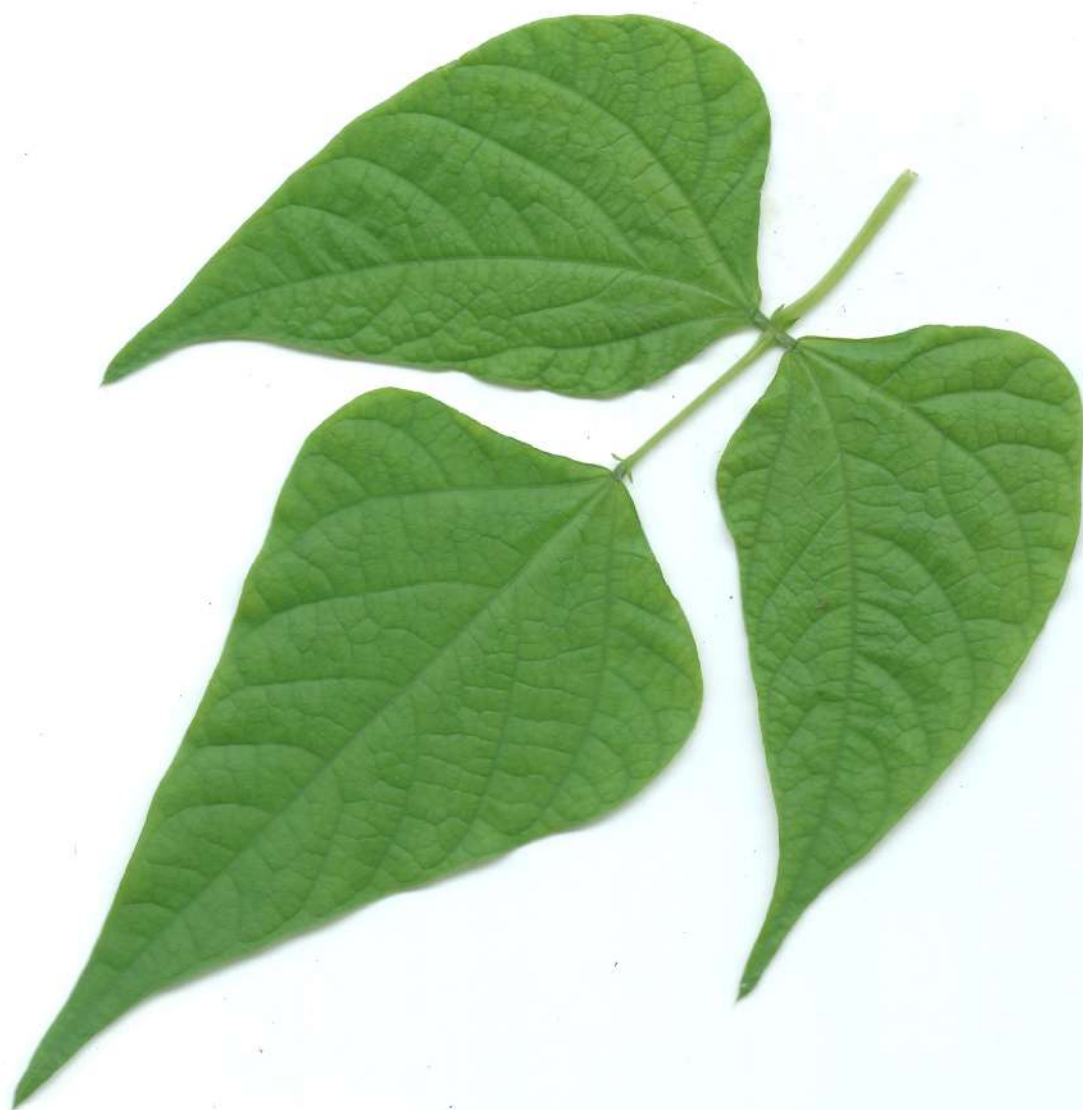

**14-3-2**

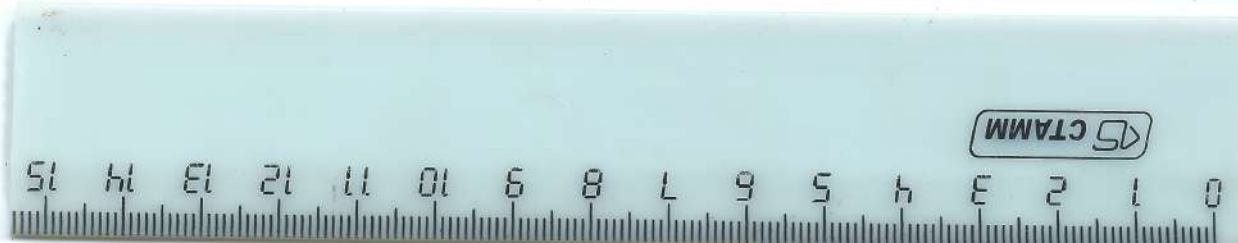

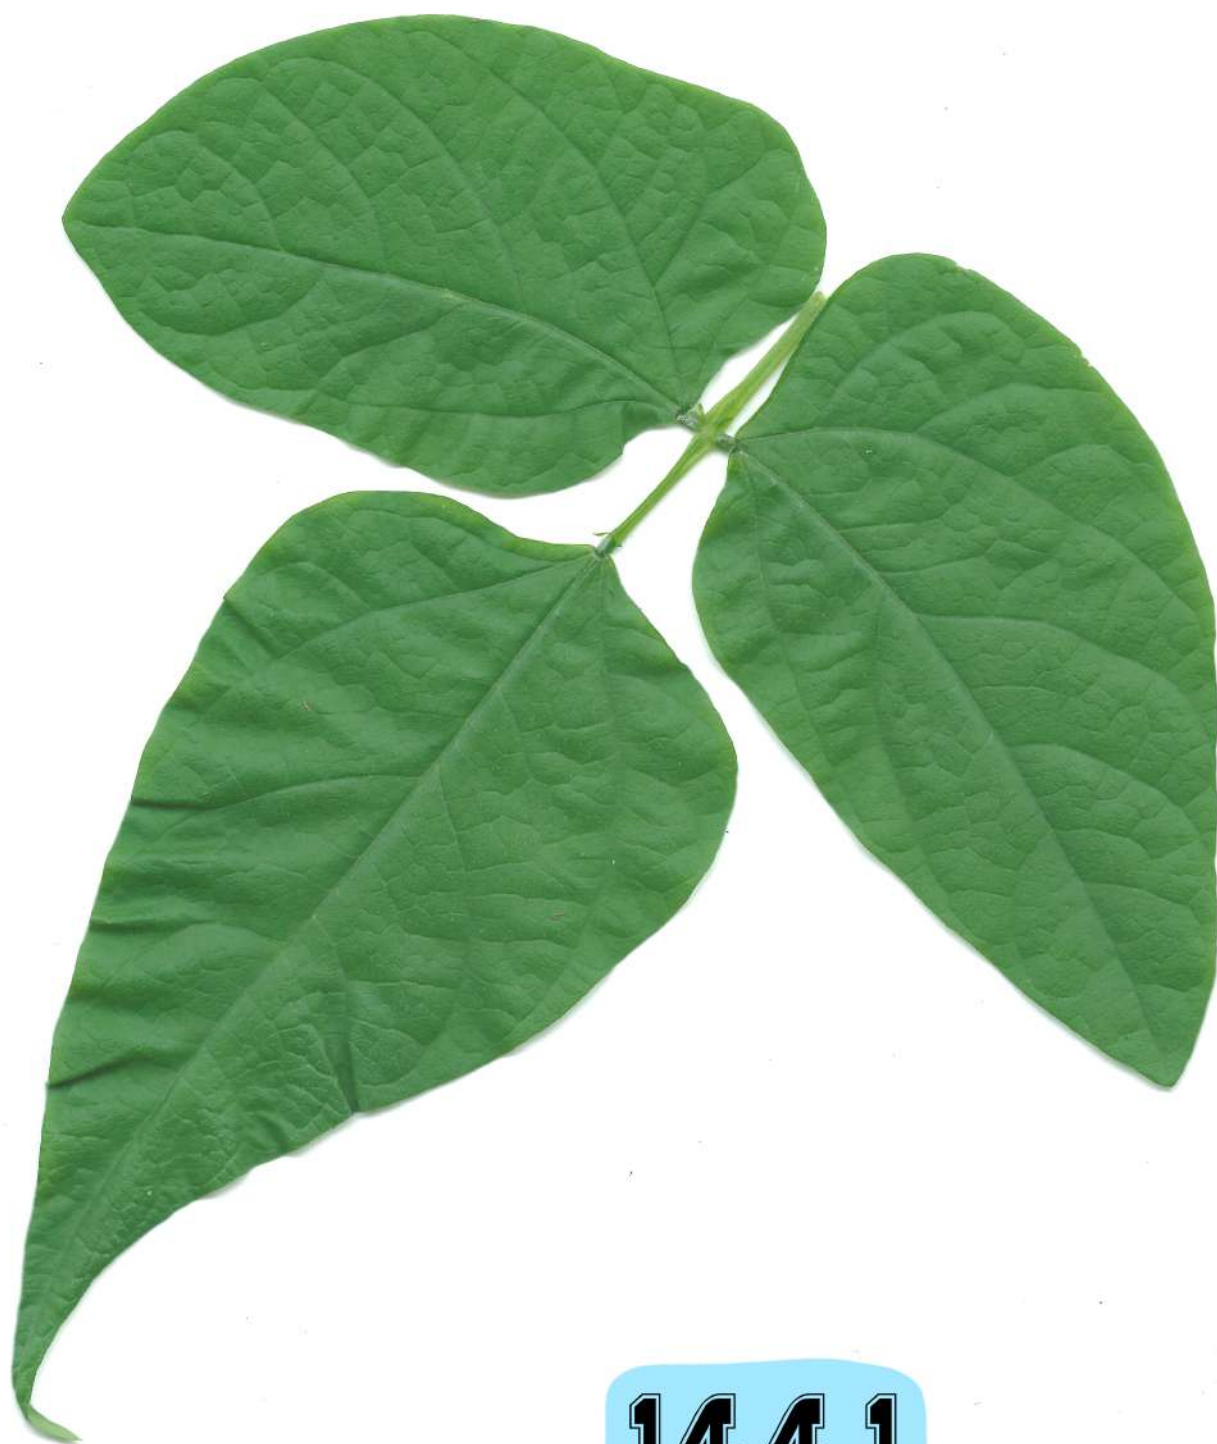

14-4-1

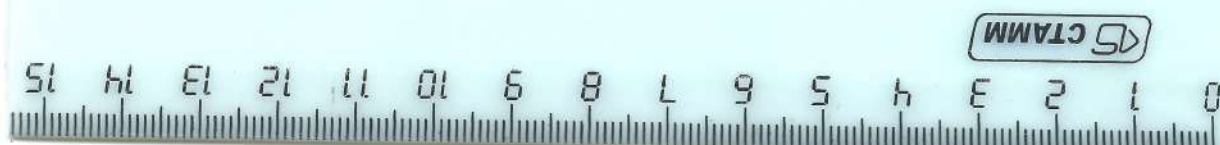



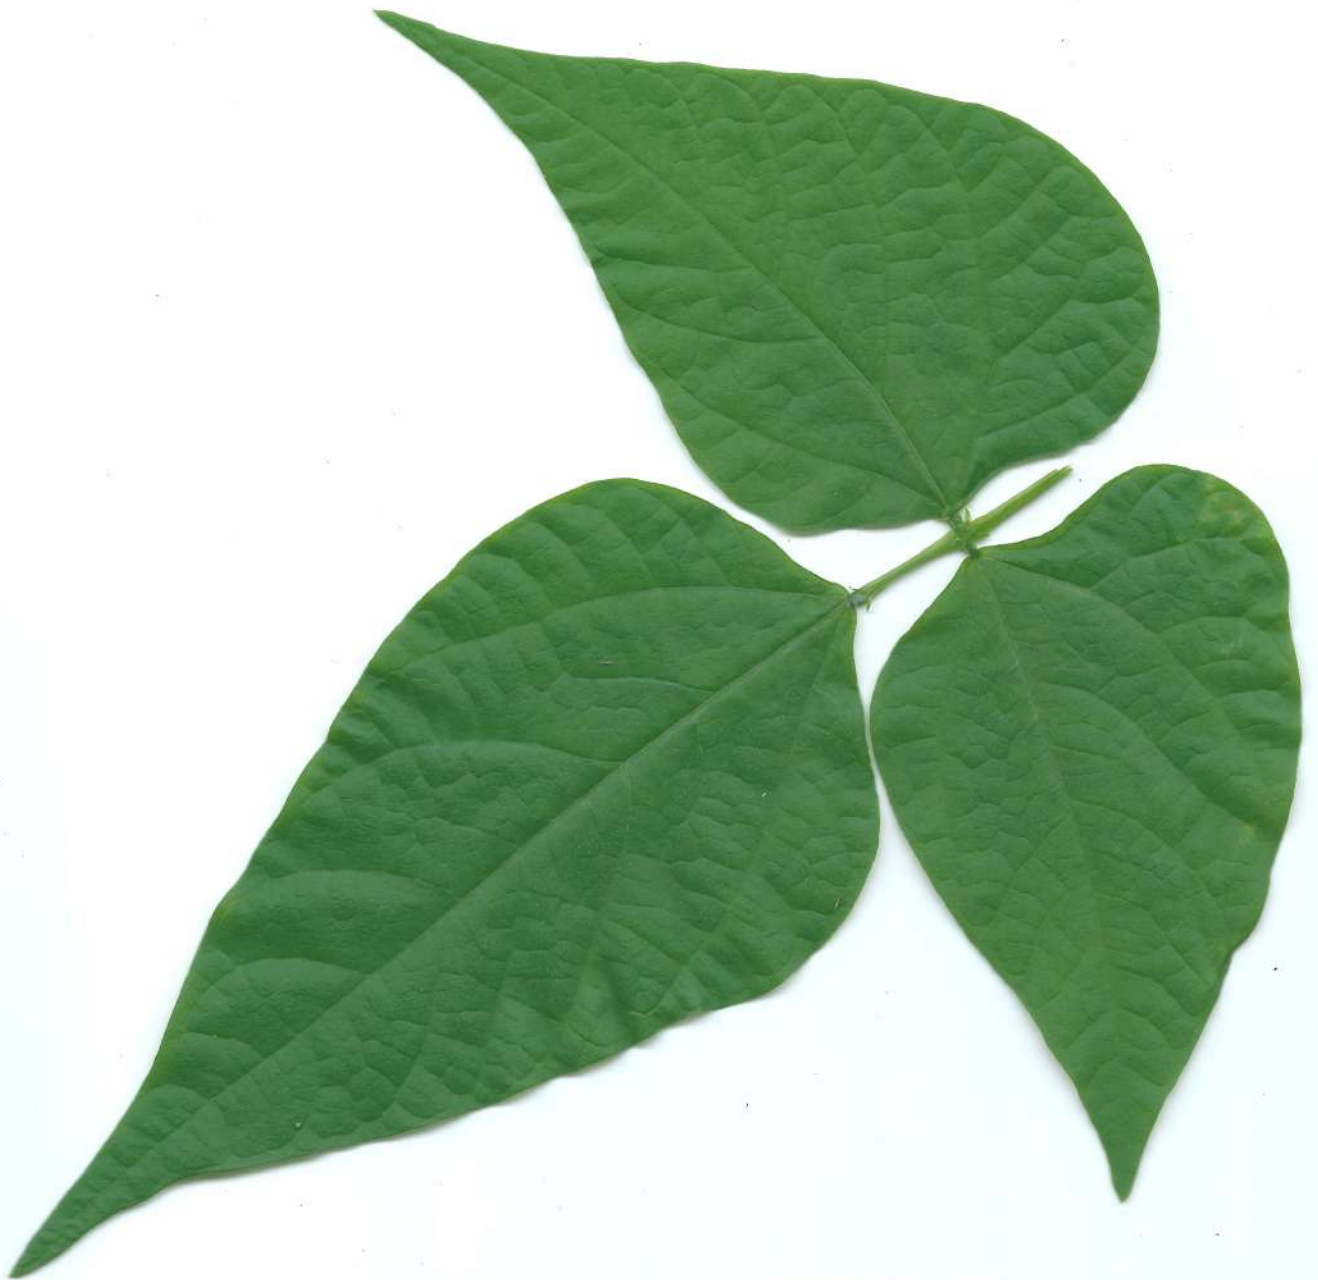

14-4-2



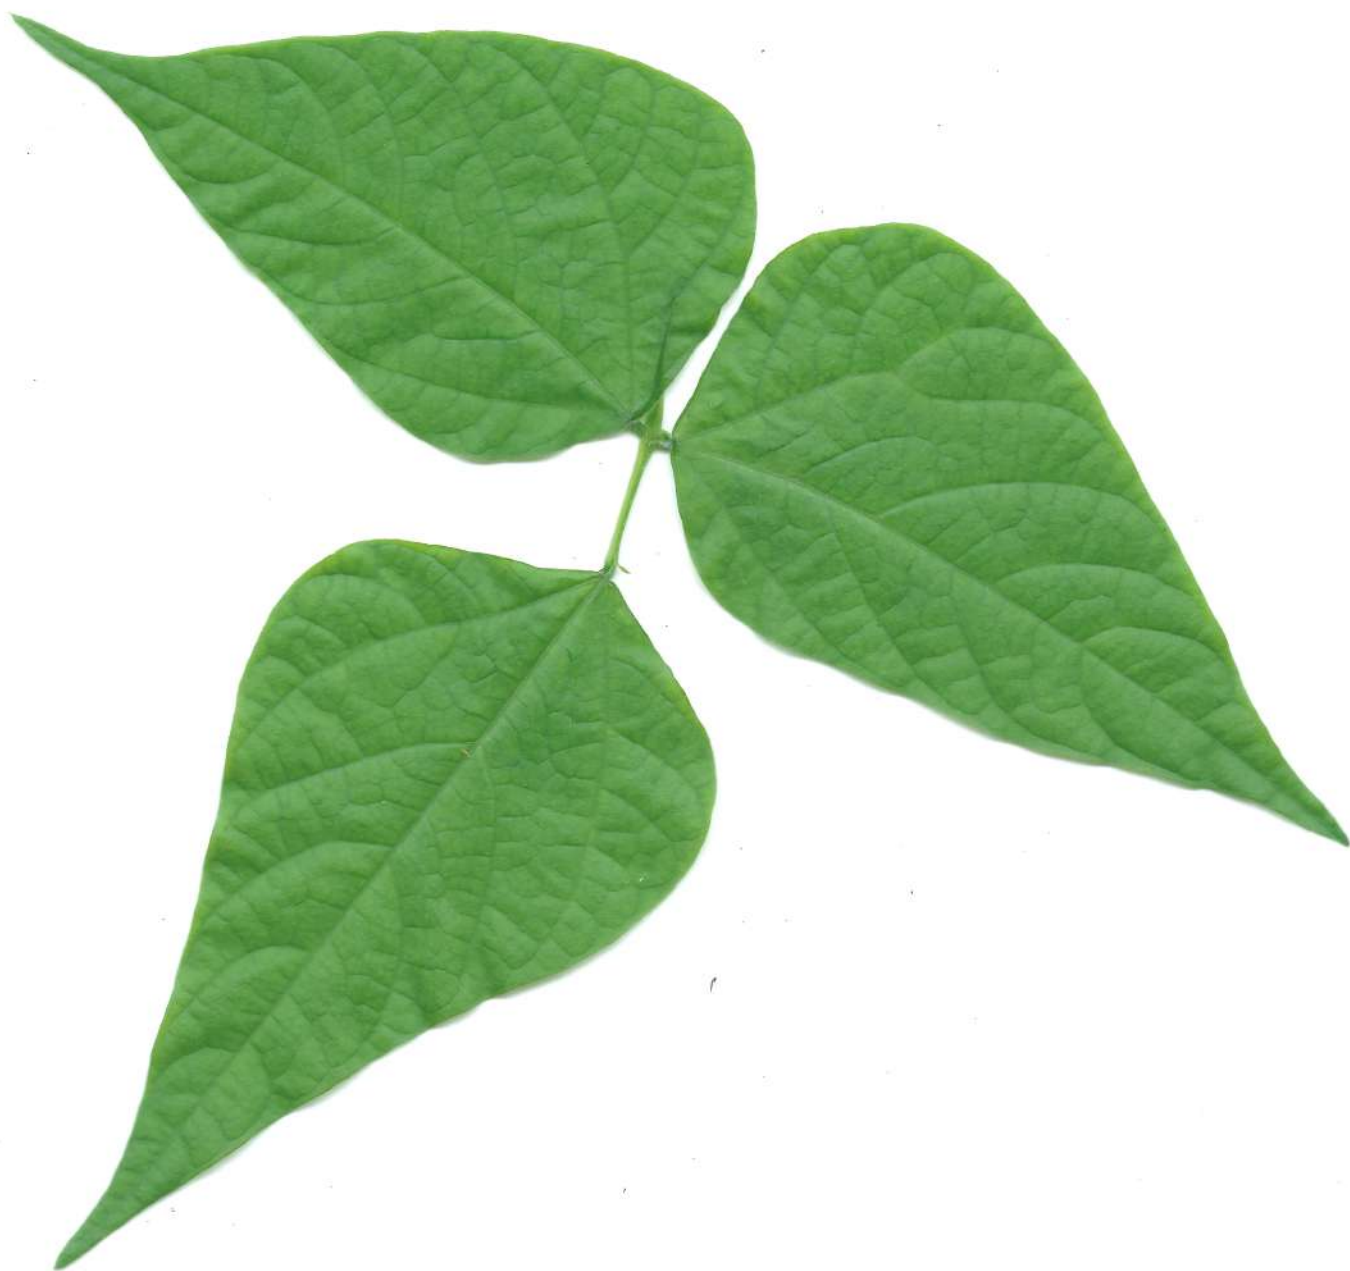

**14-4-3**

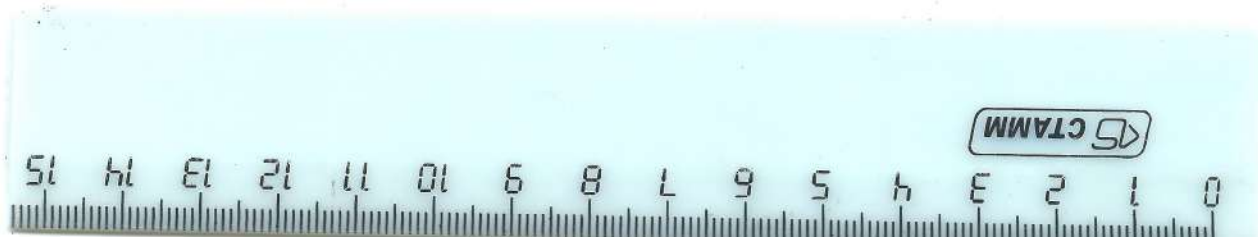

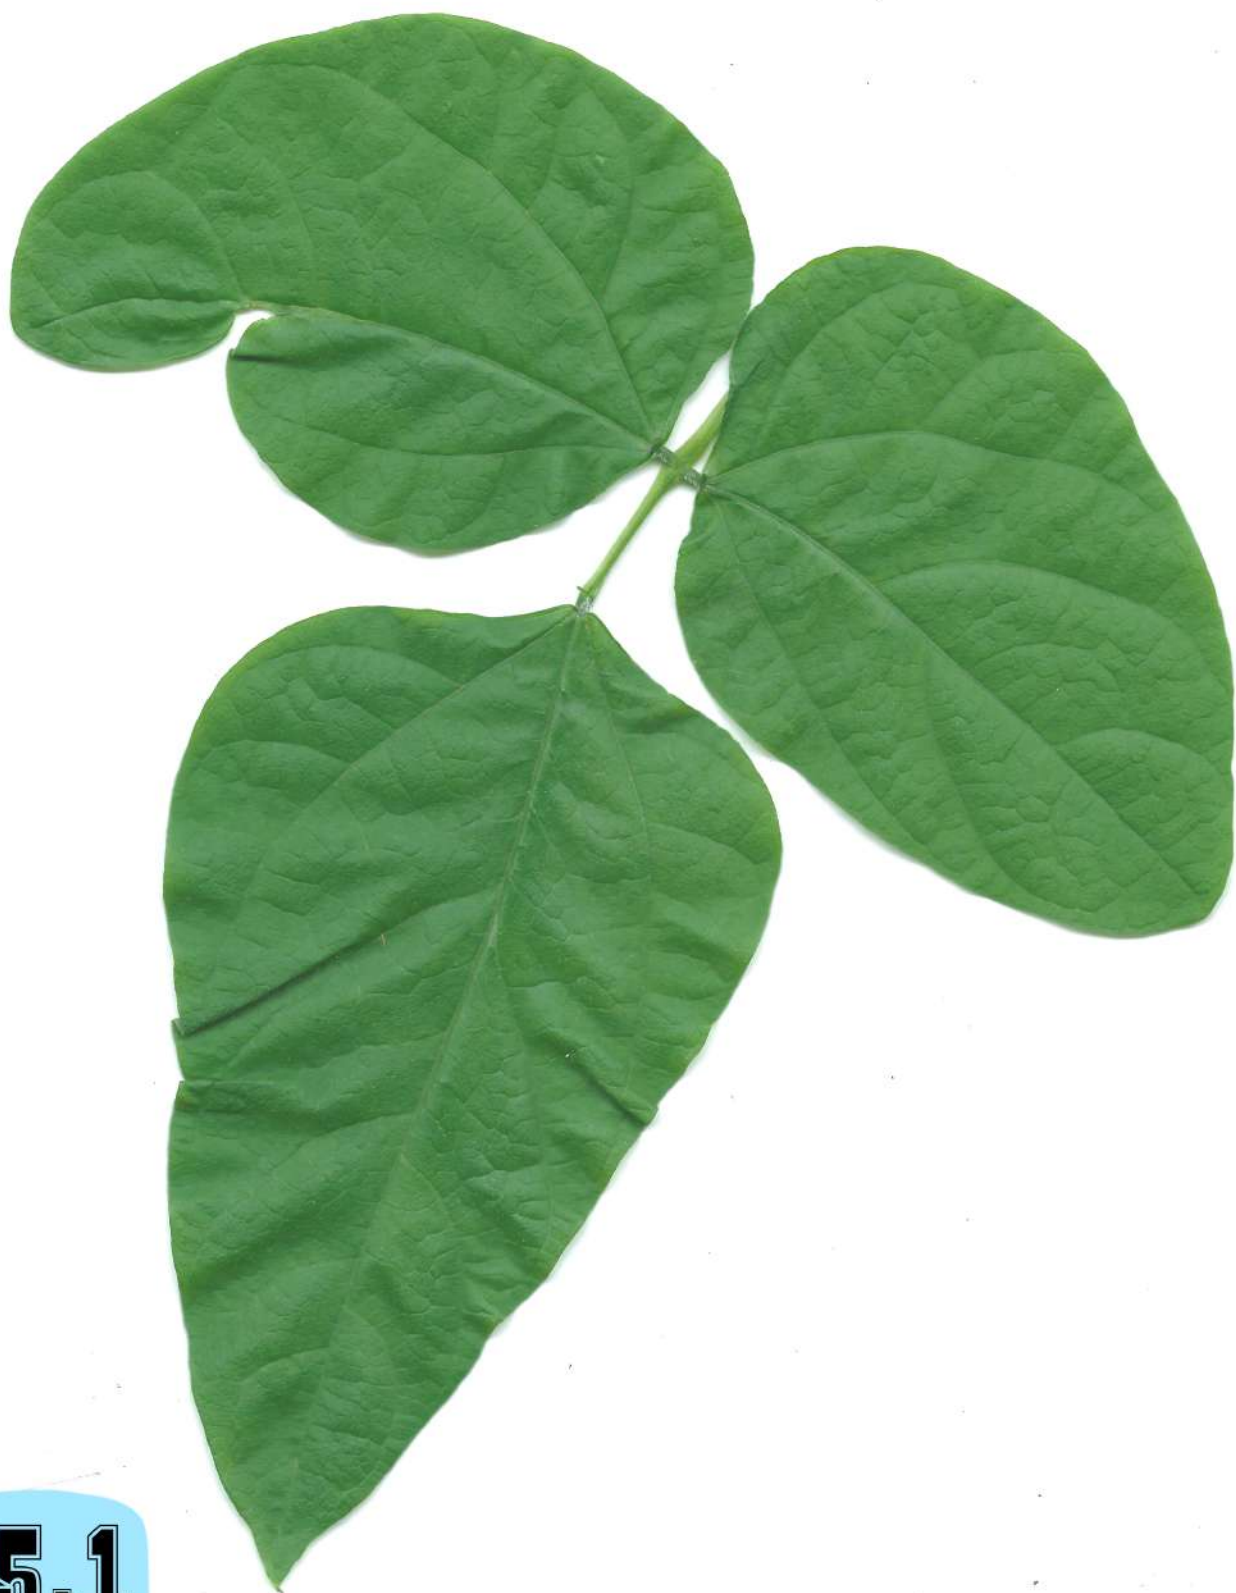

**14-5-1**

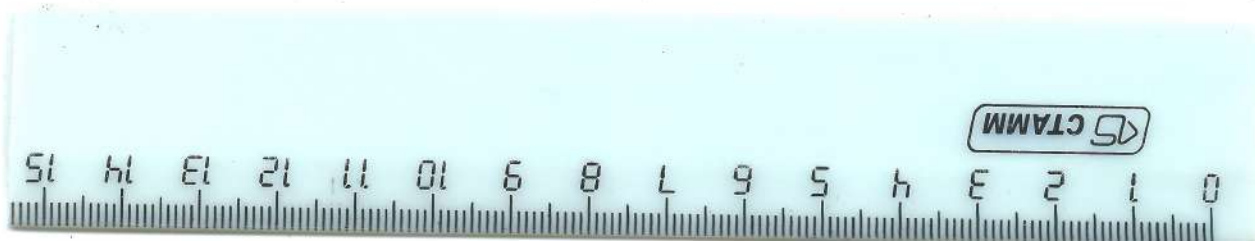

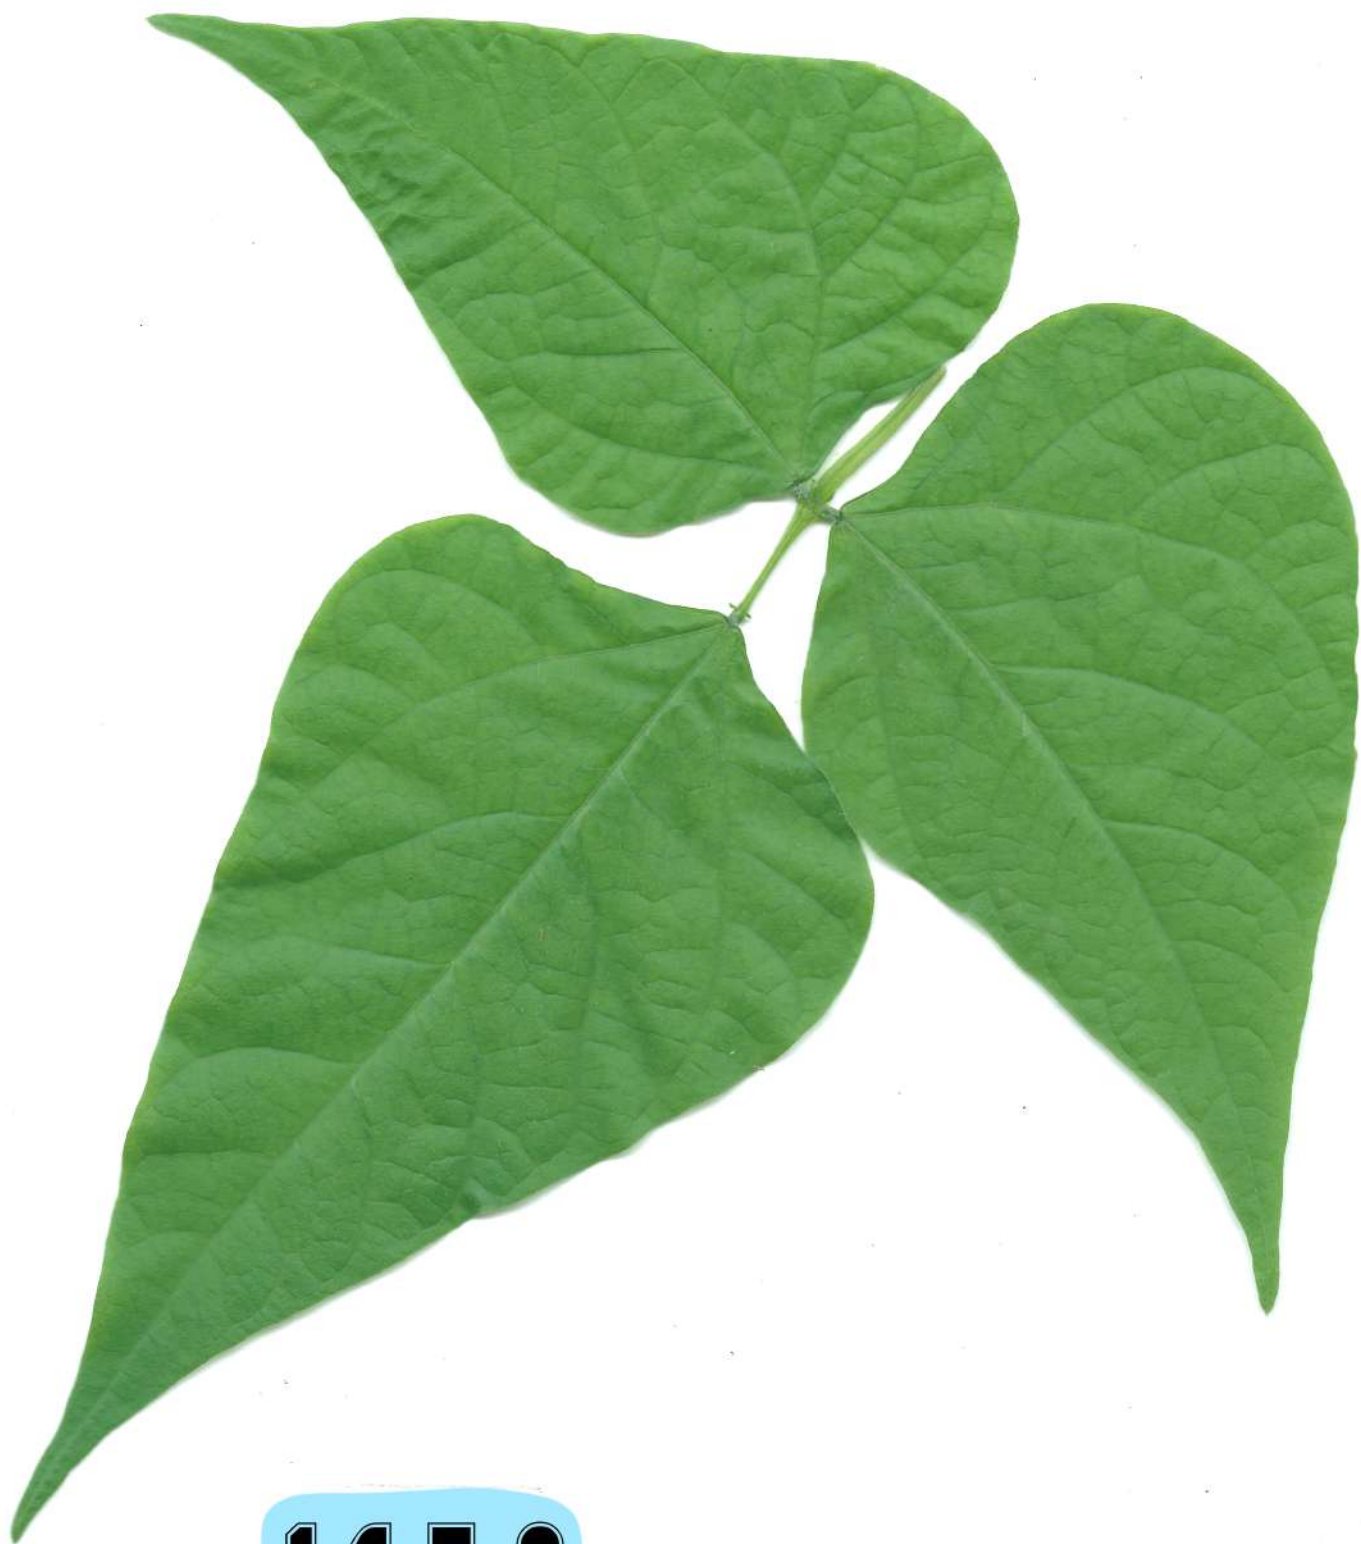

**14-5-3**

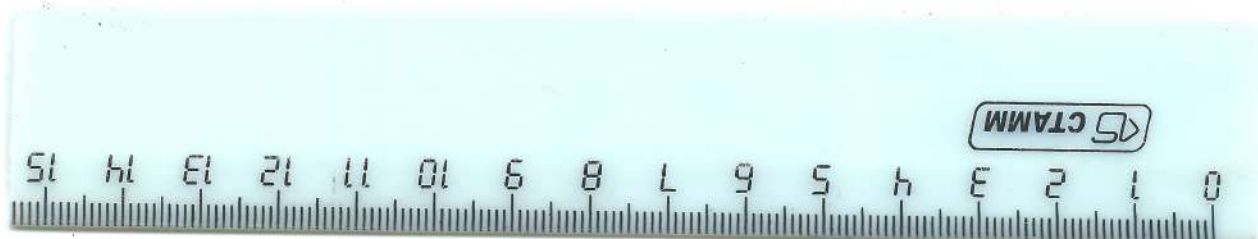



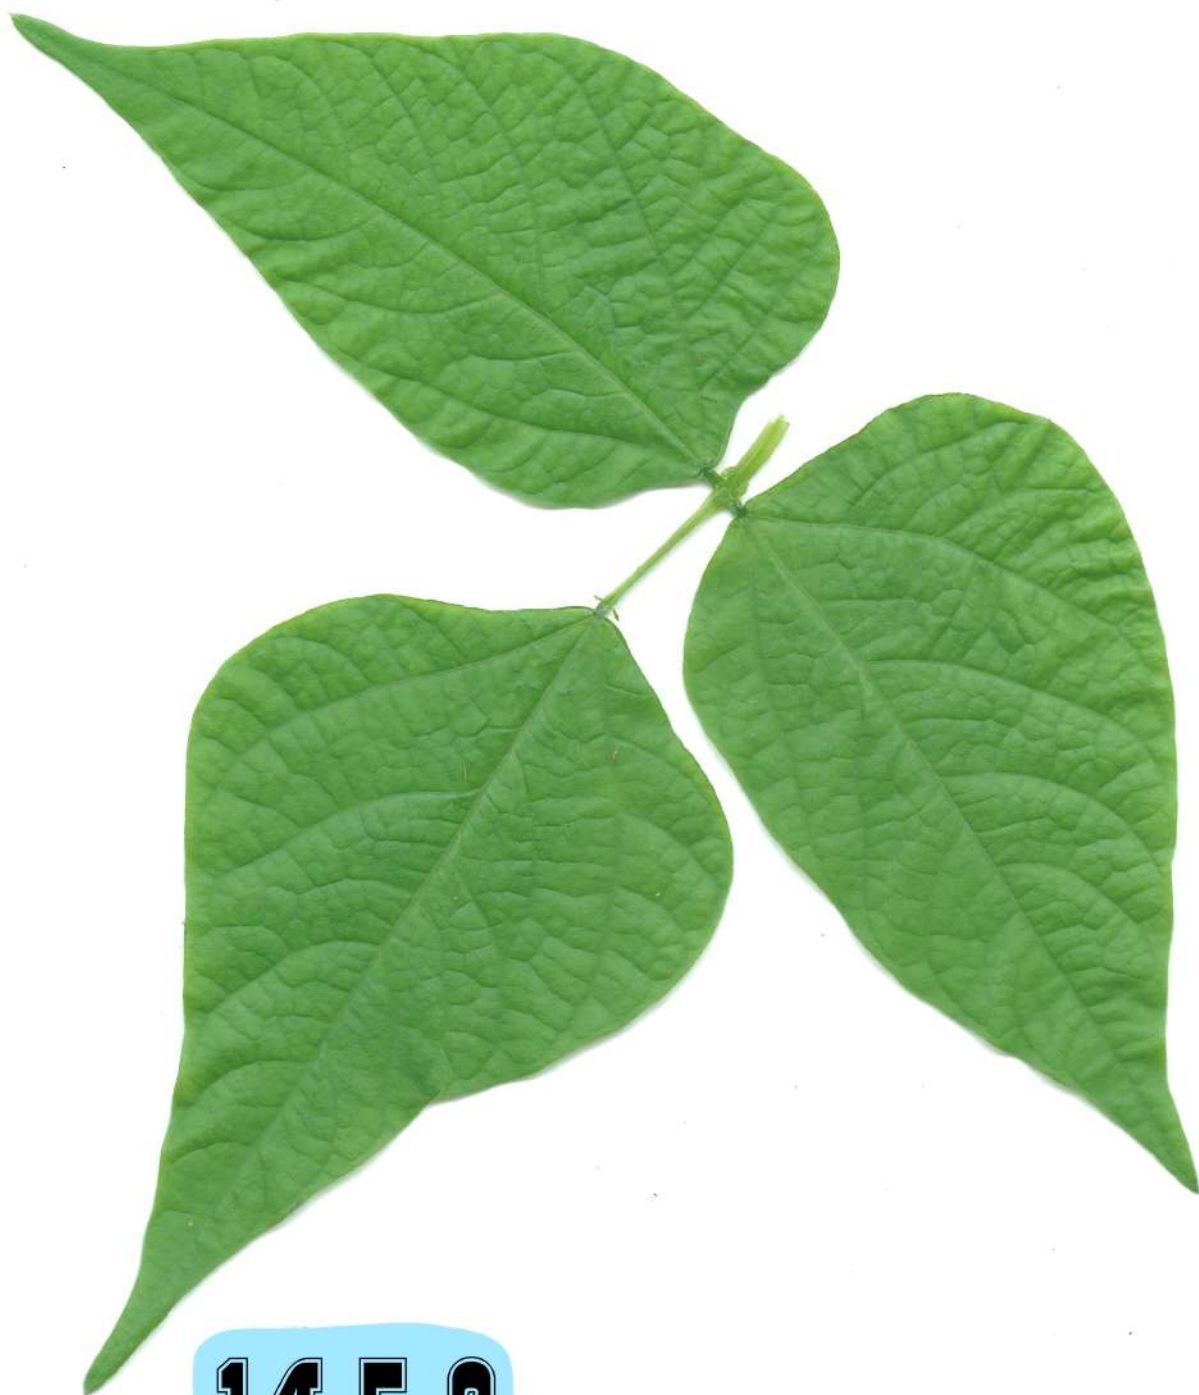

14-5-2

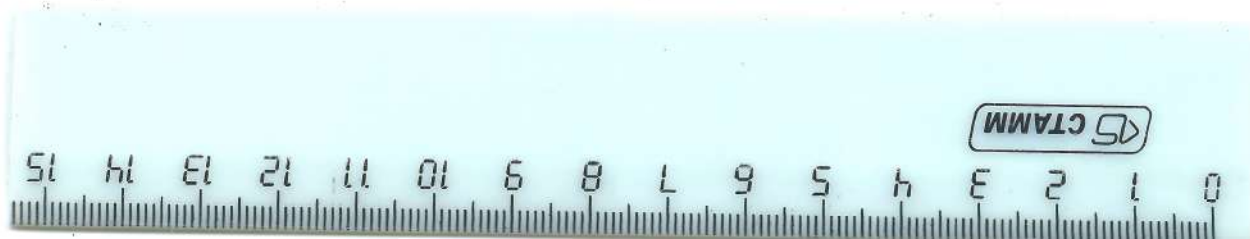



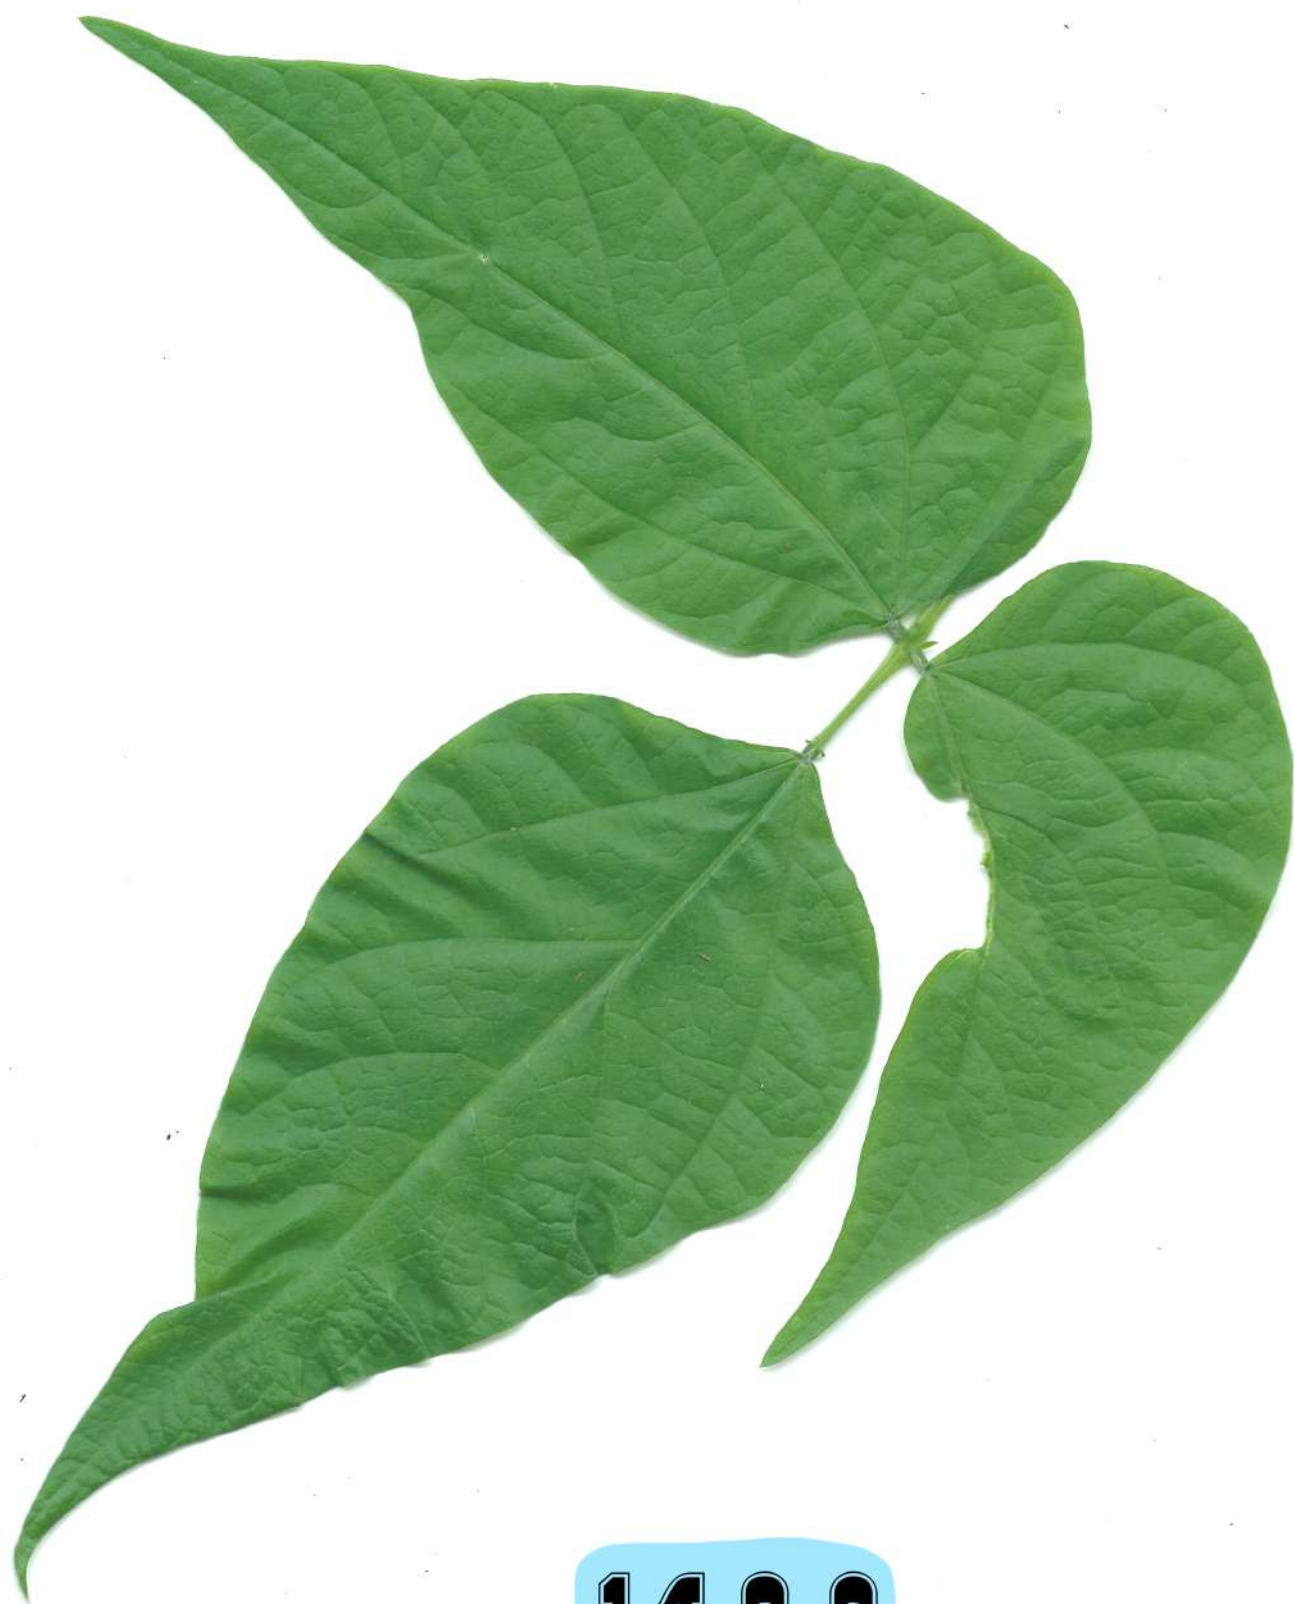

**14-6-2**

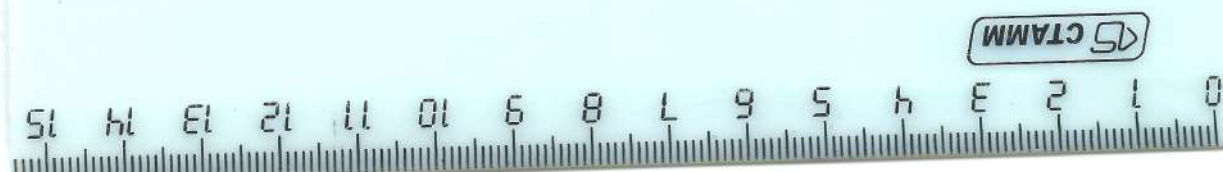

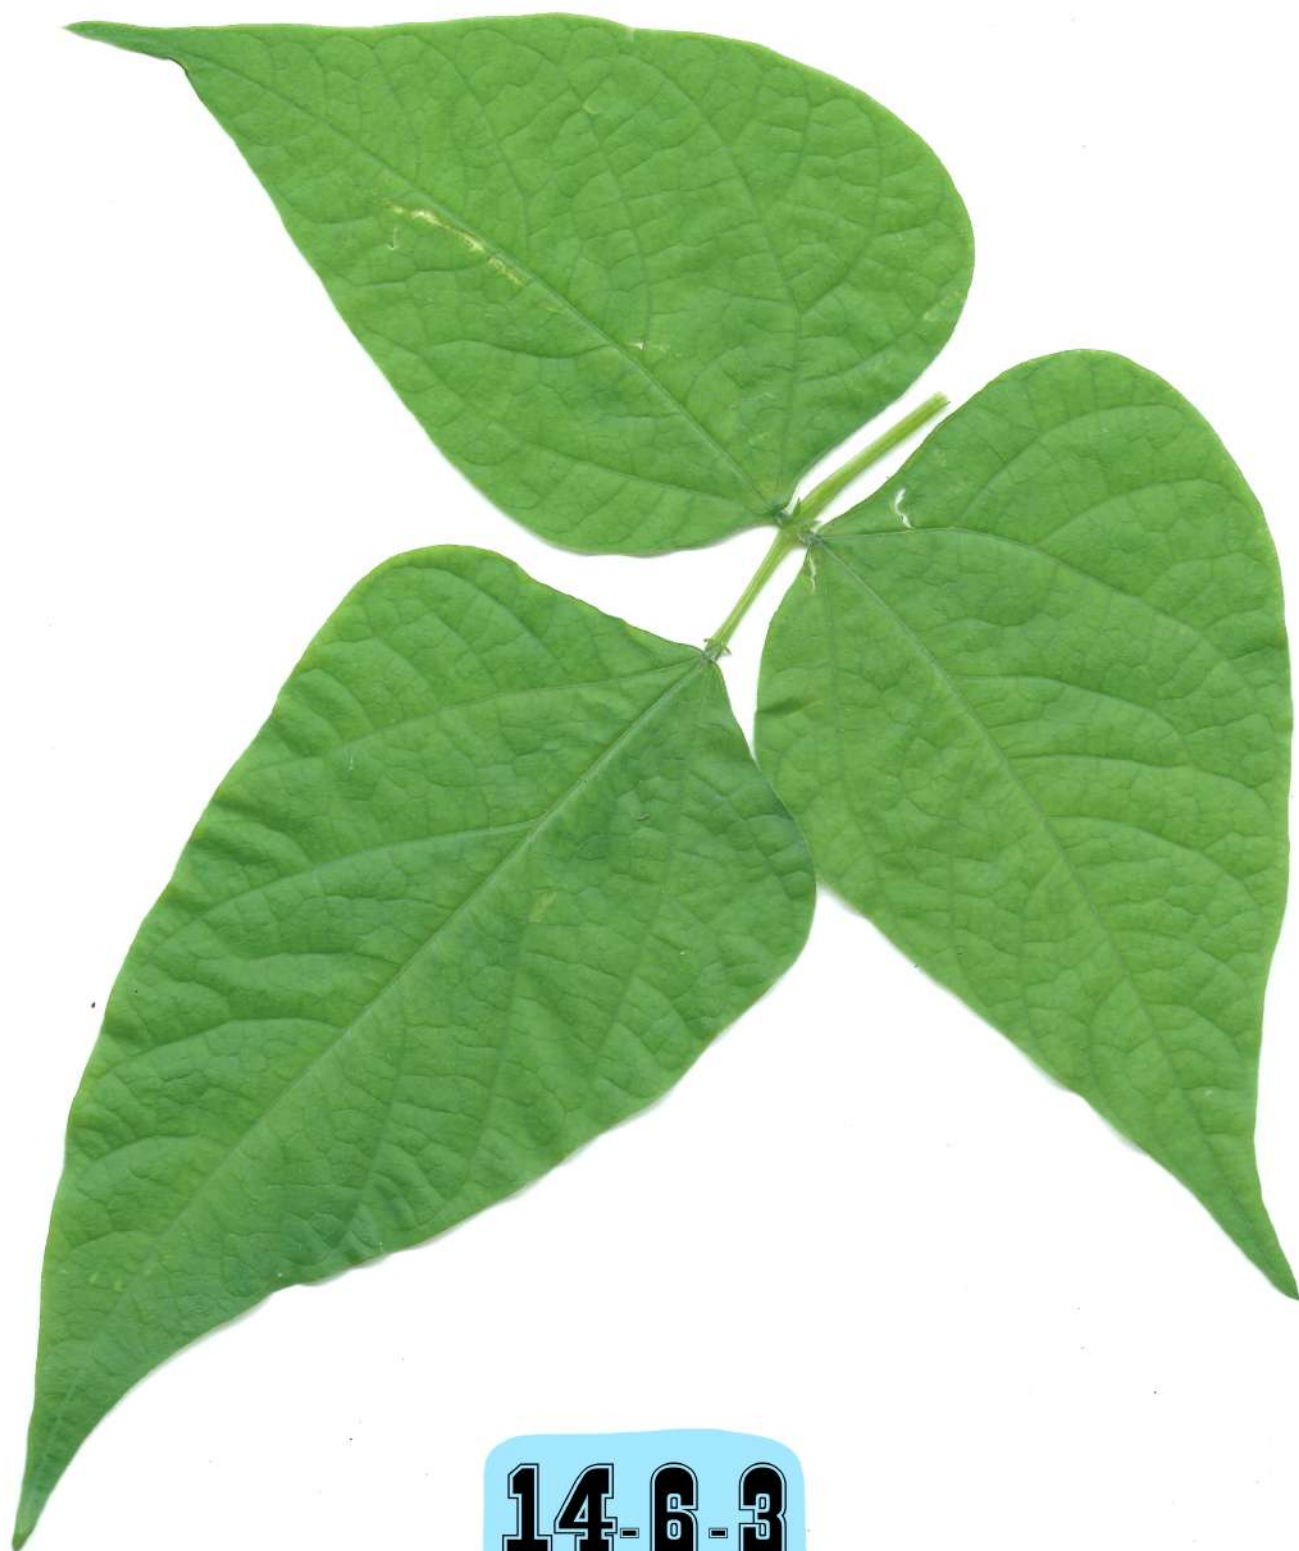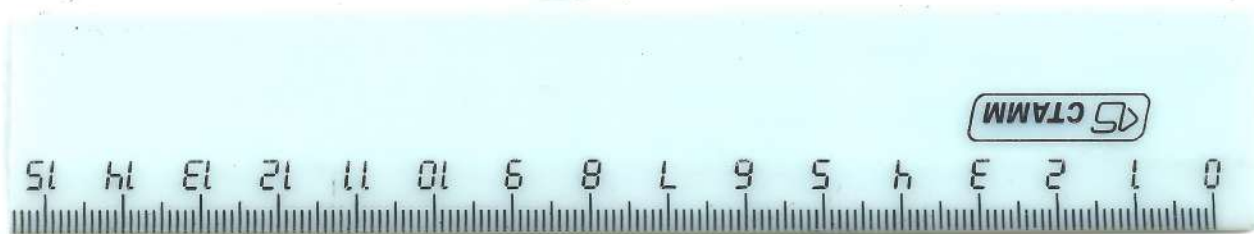

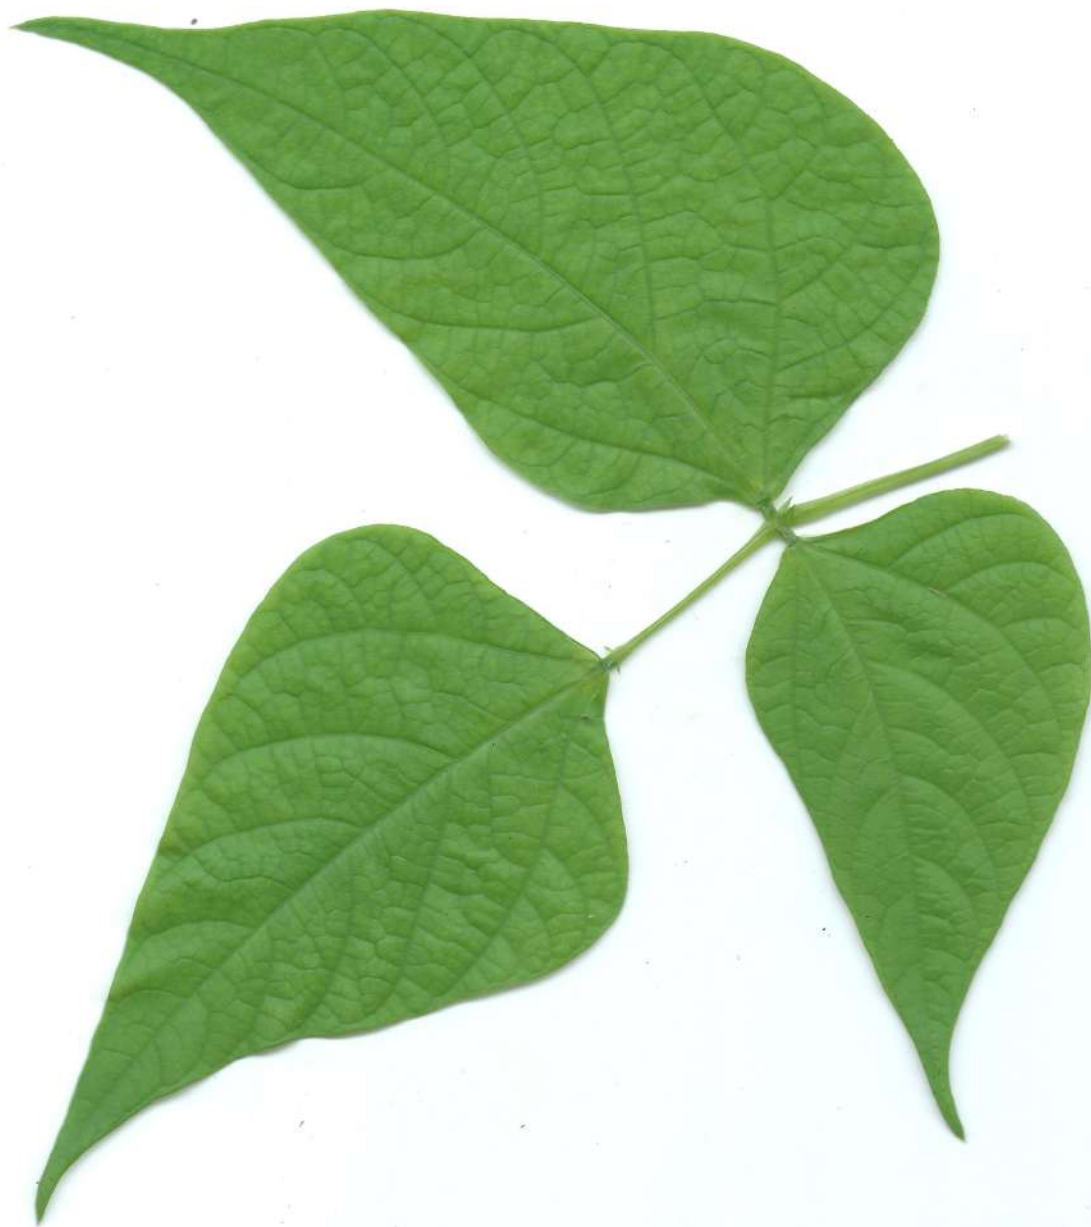

**14-6-1**

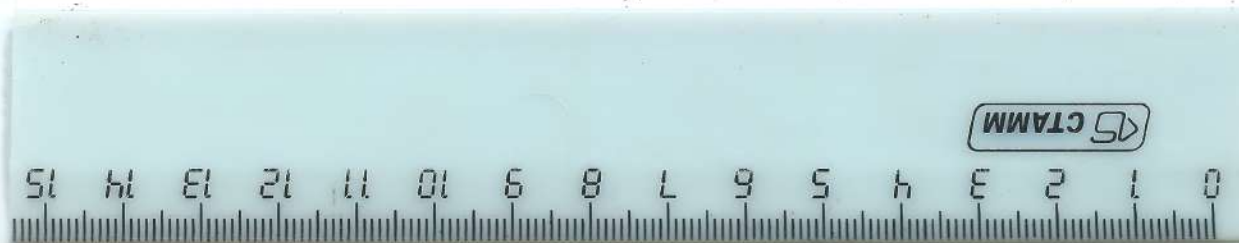



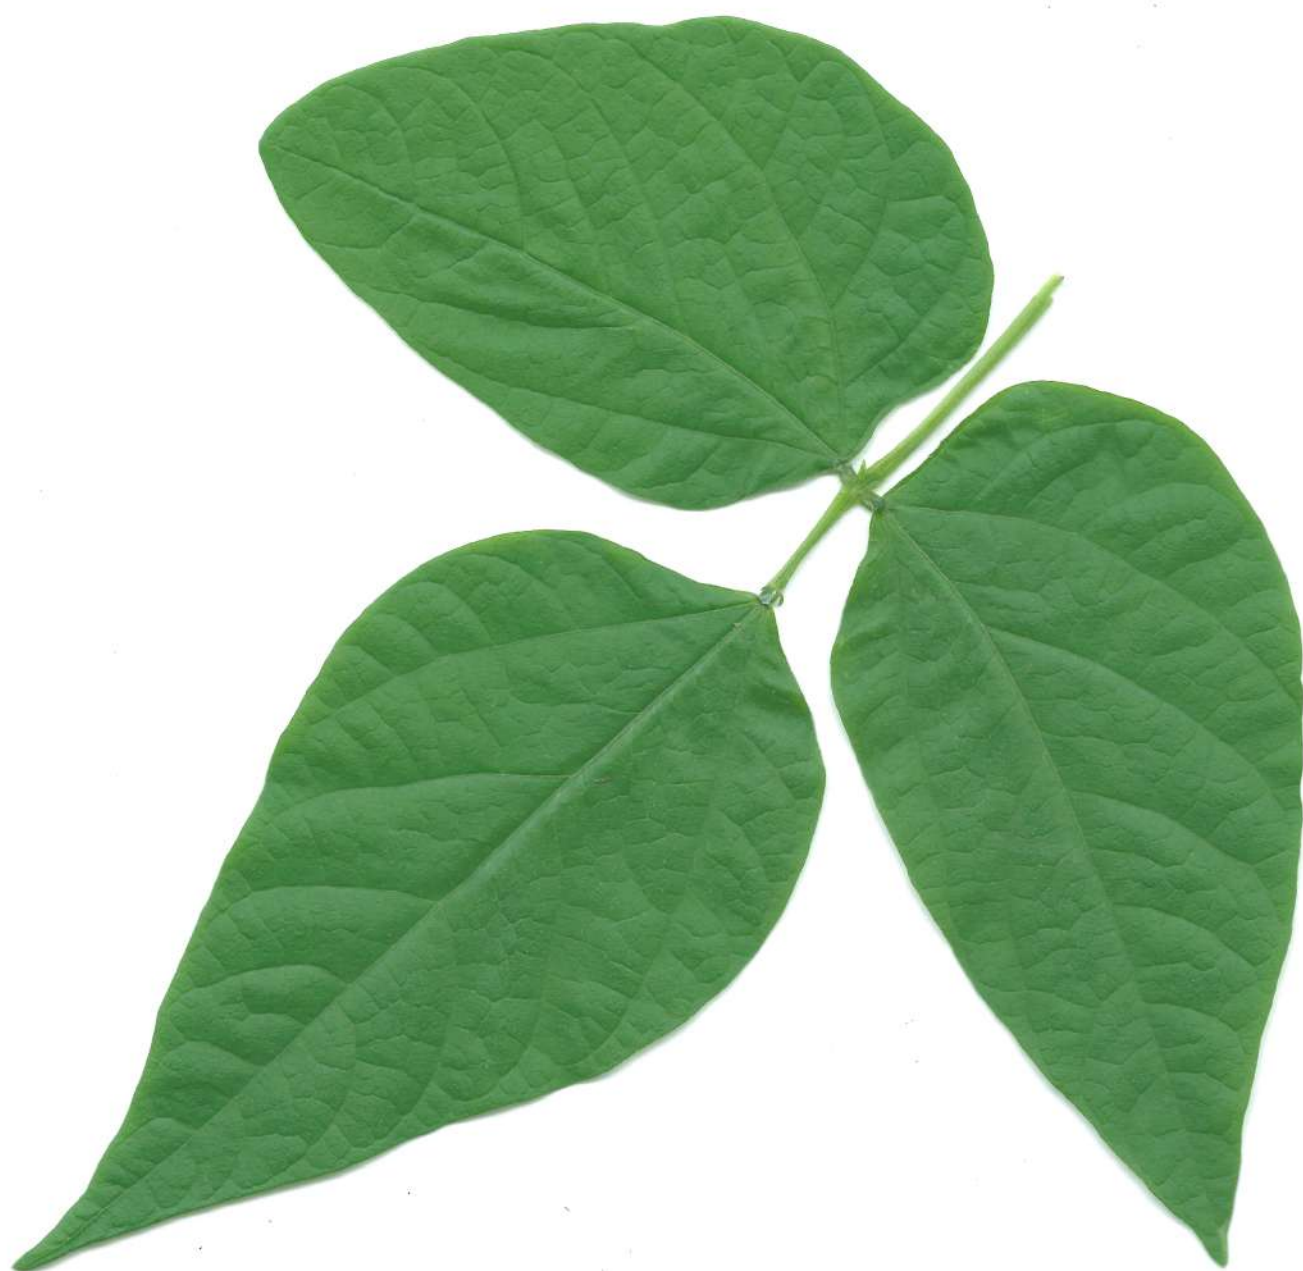

**14-7-2**

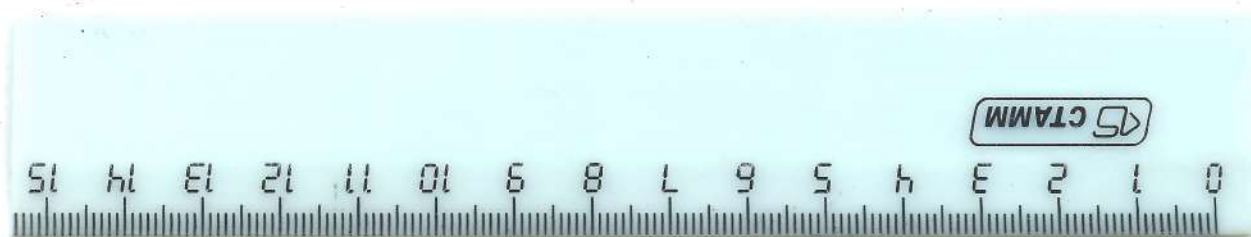



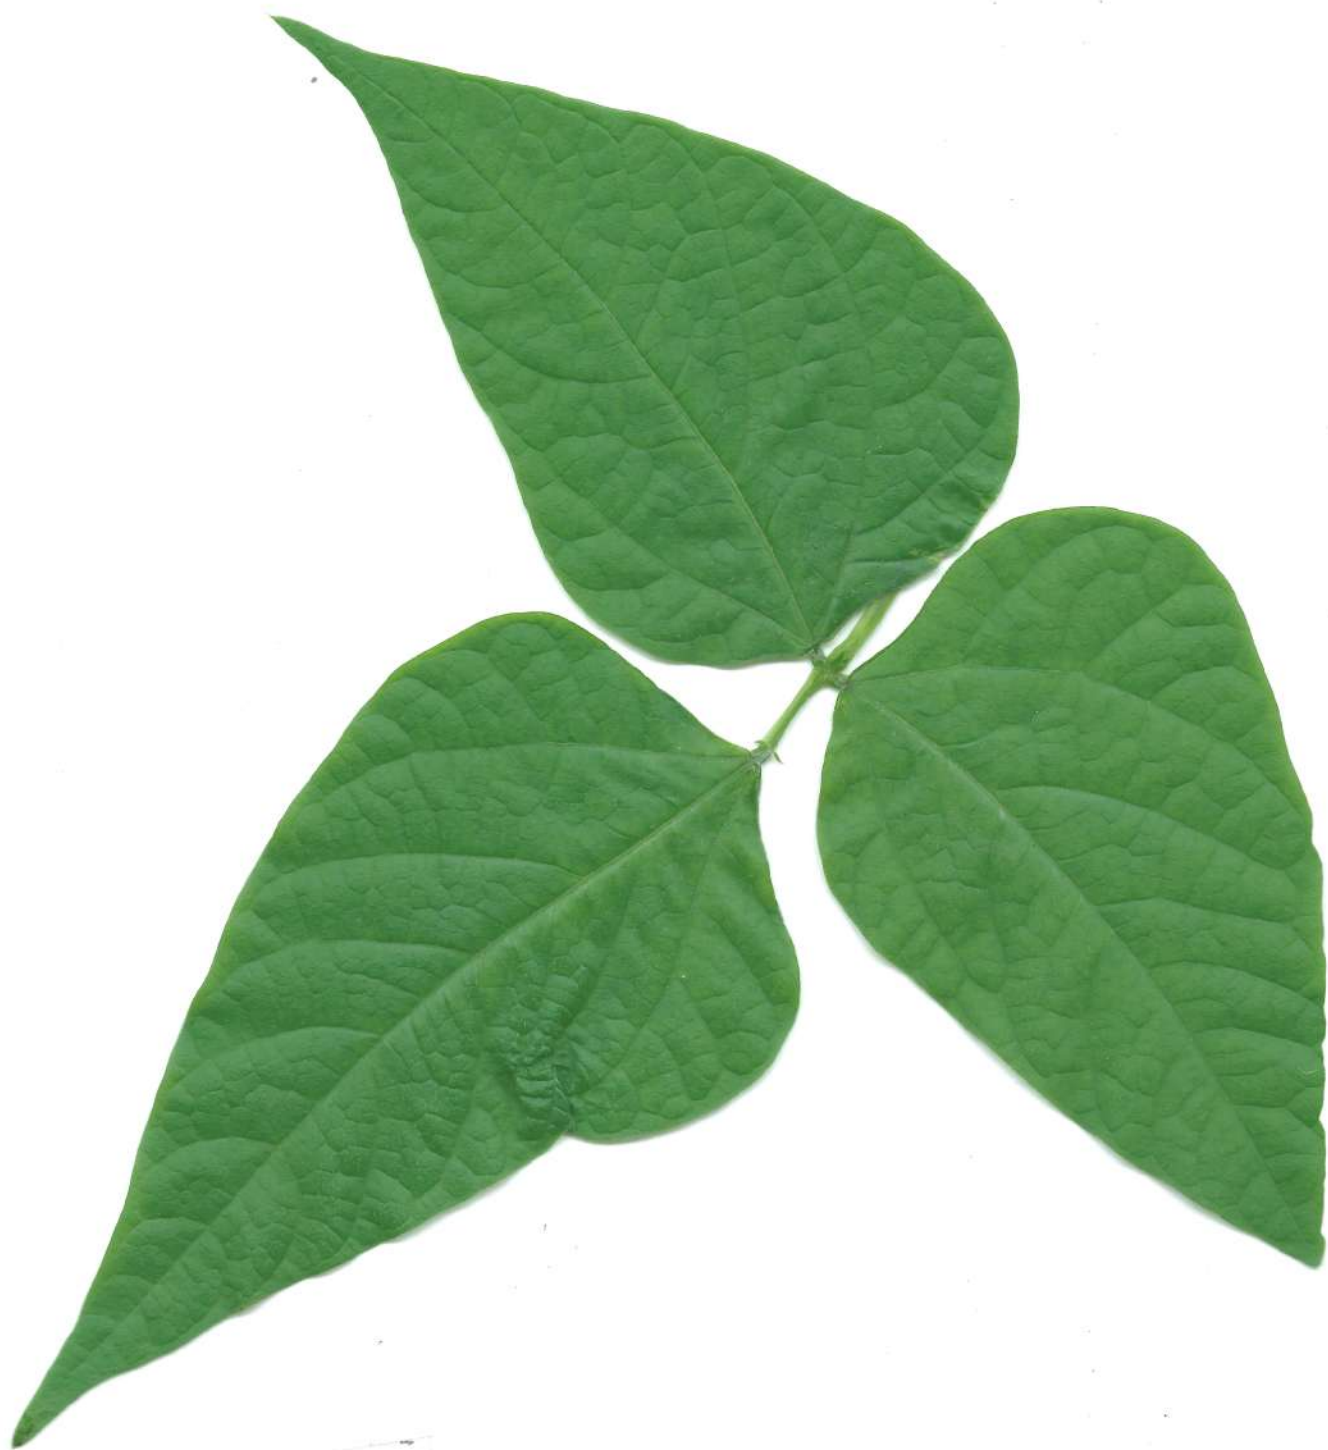

**14-7-3**

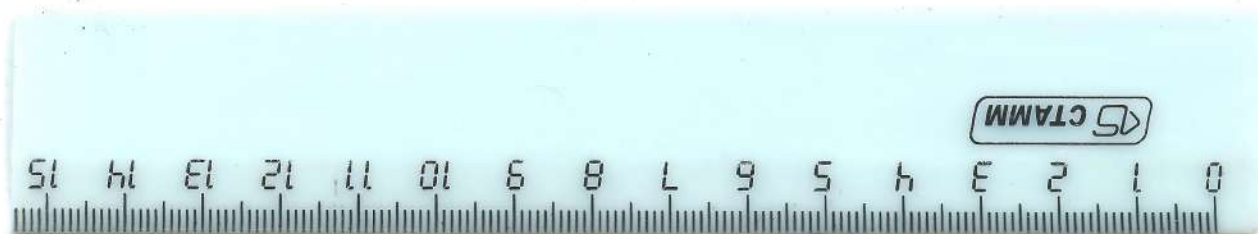

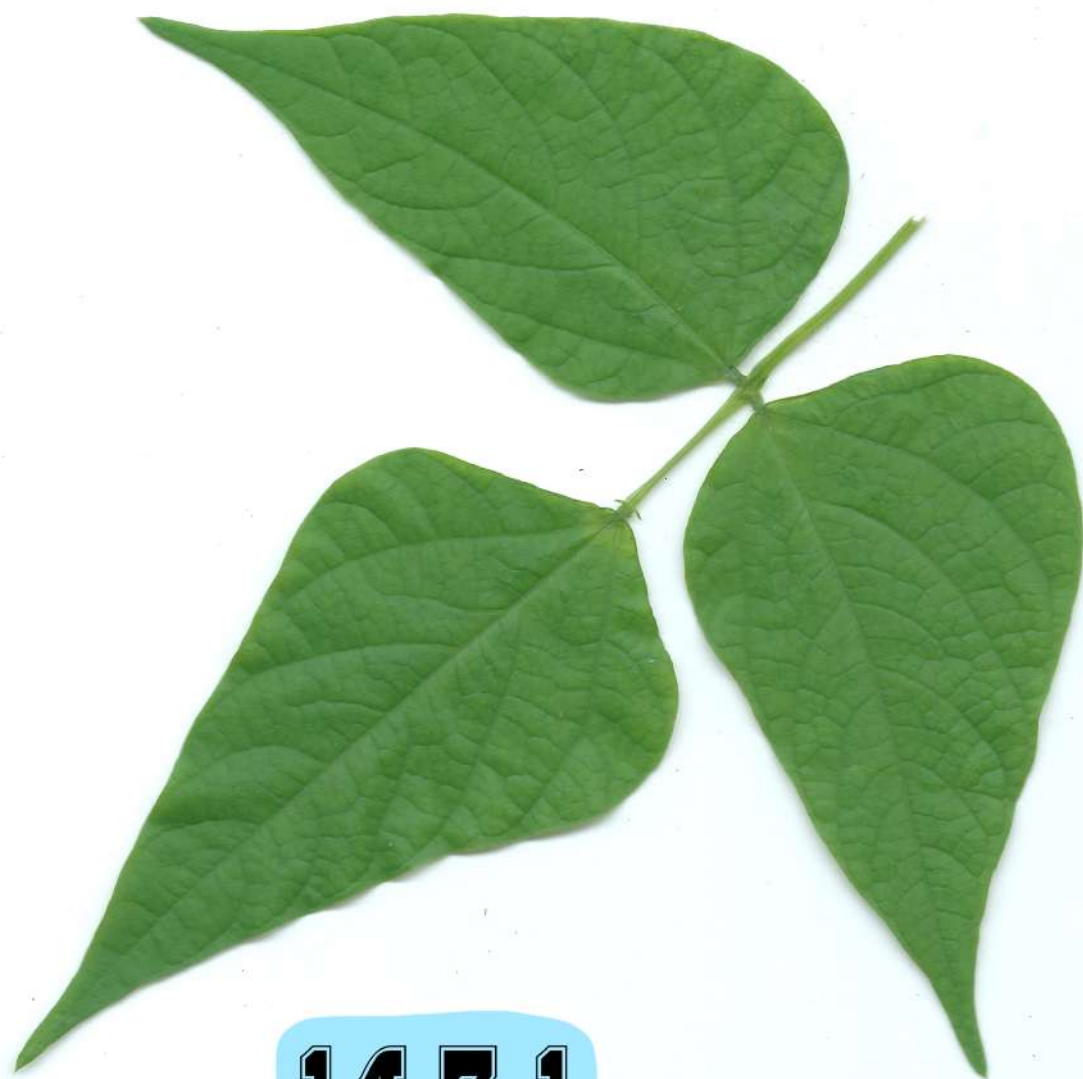

**14-7-1**

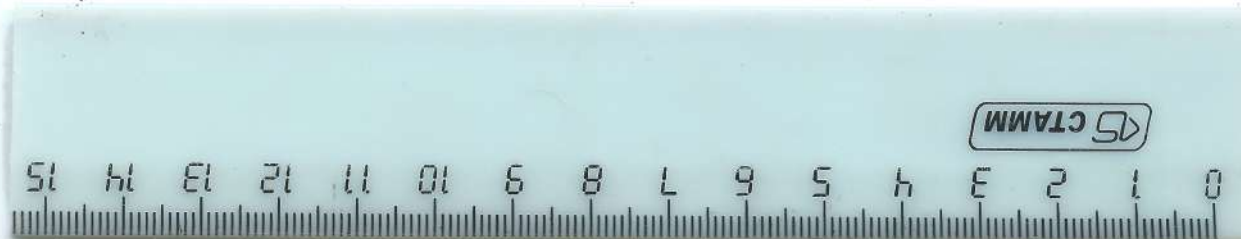

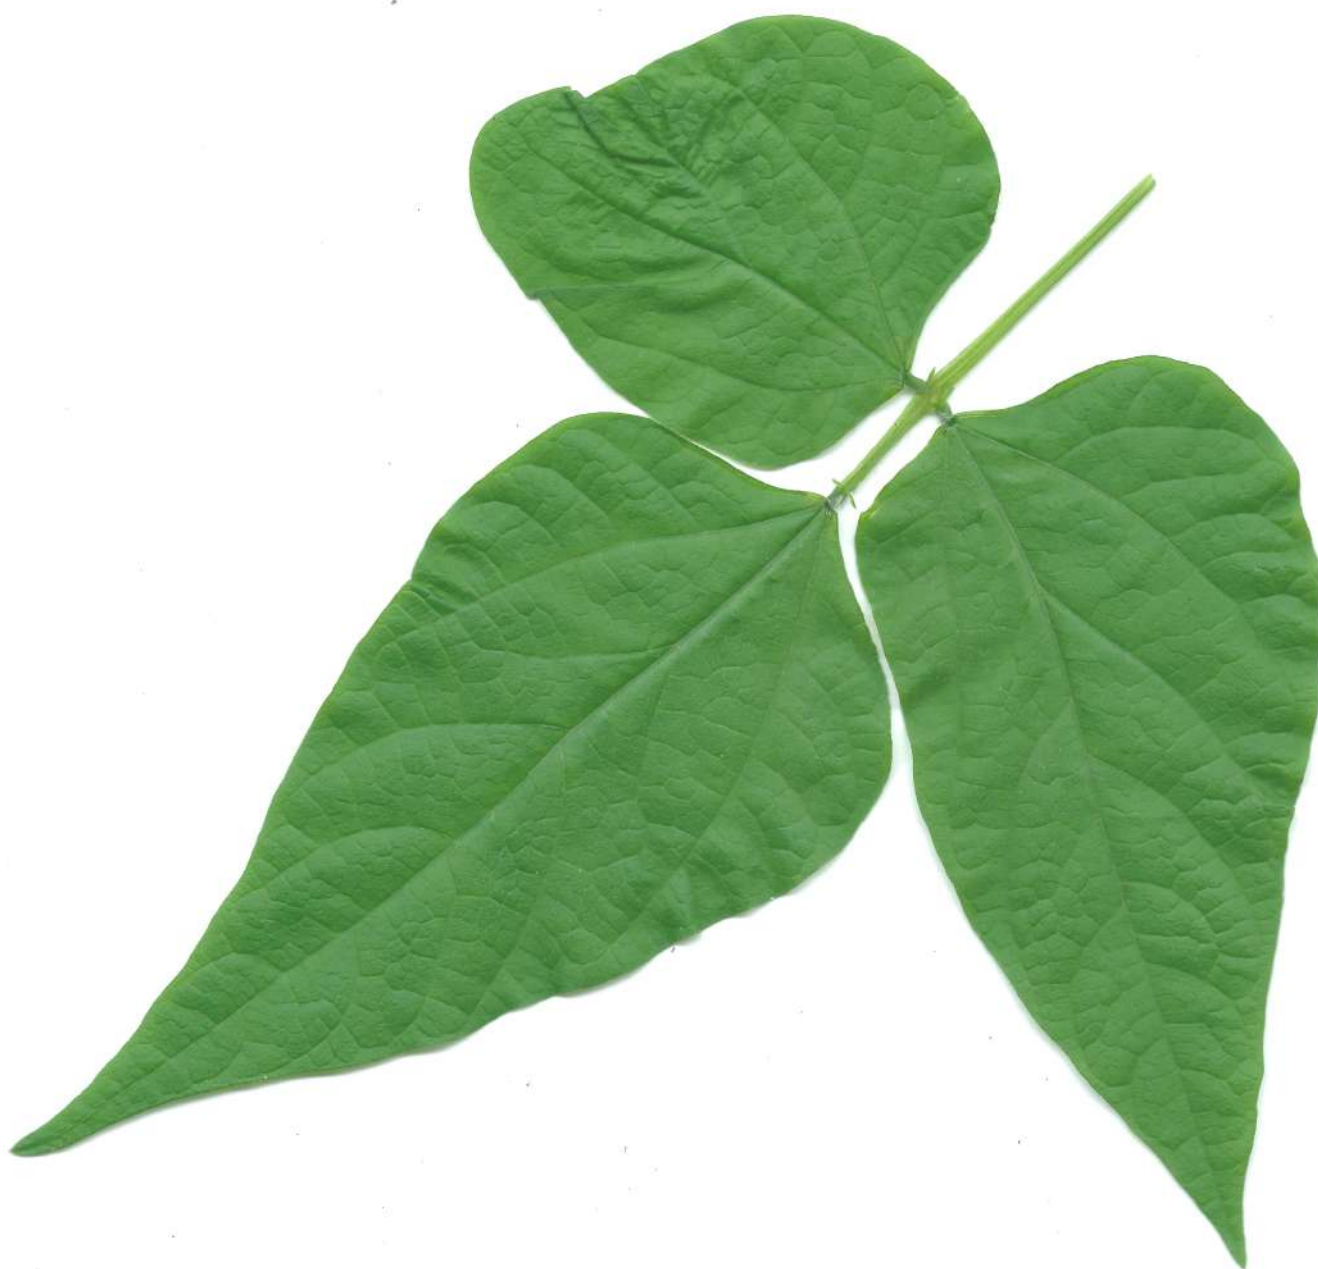

**14-8-1**

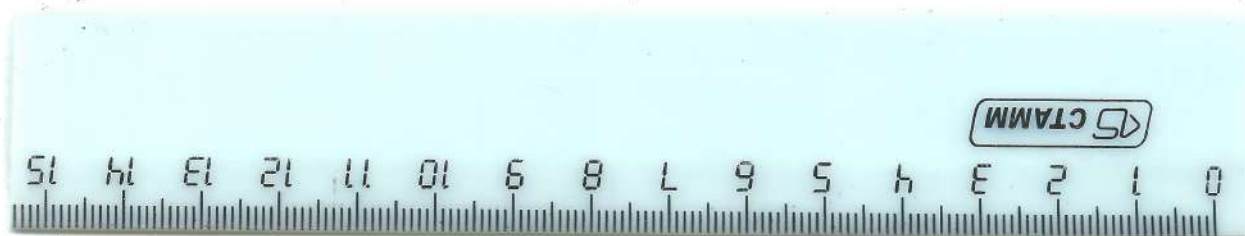

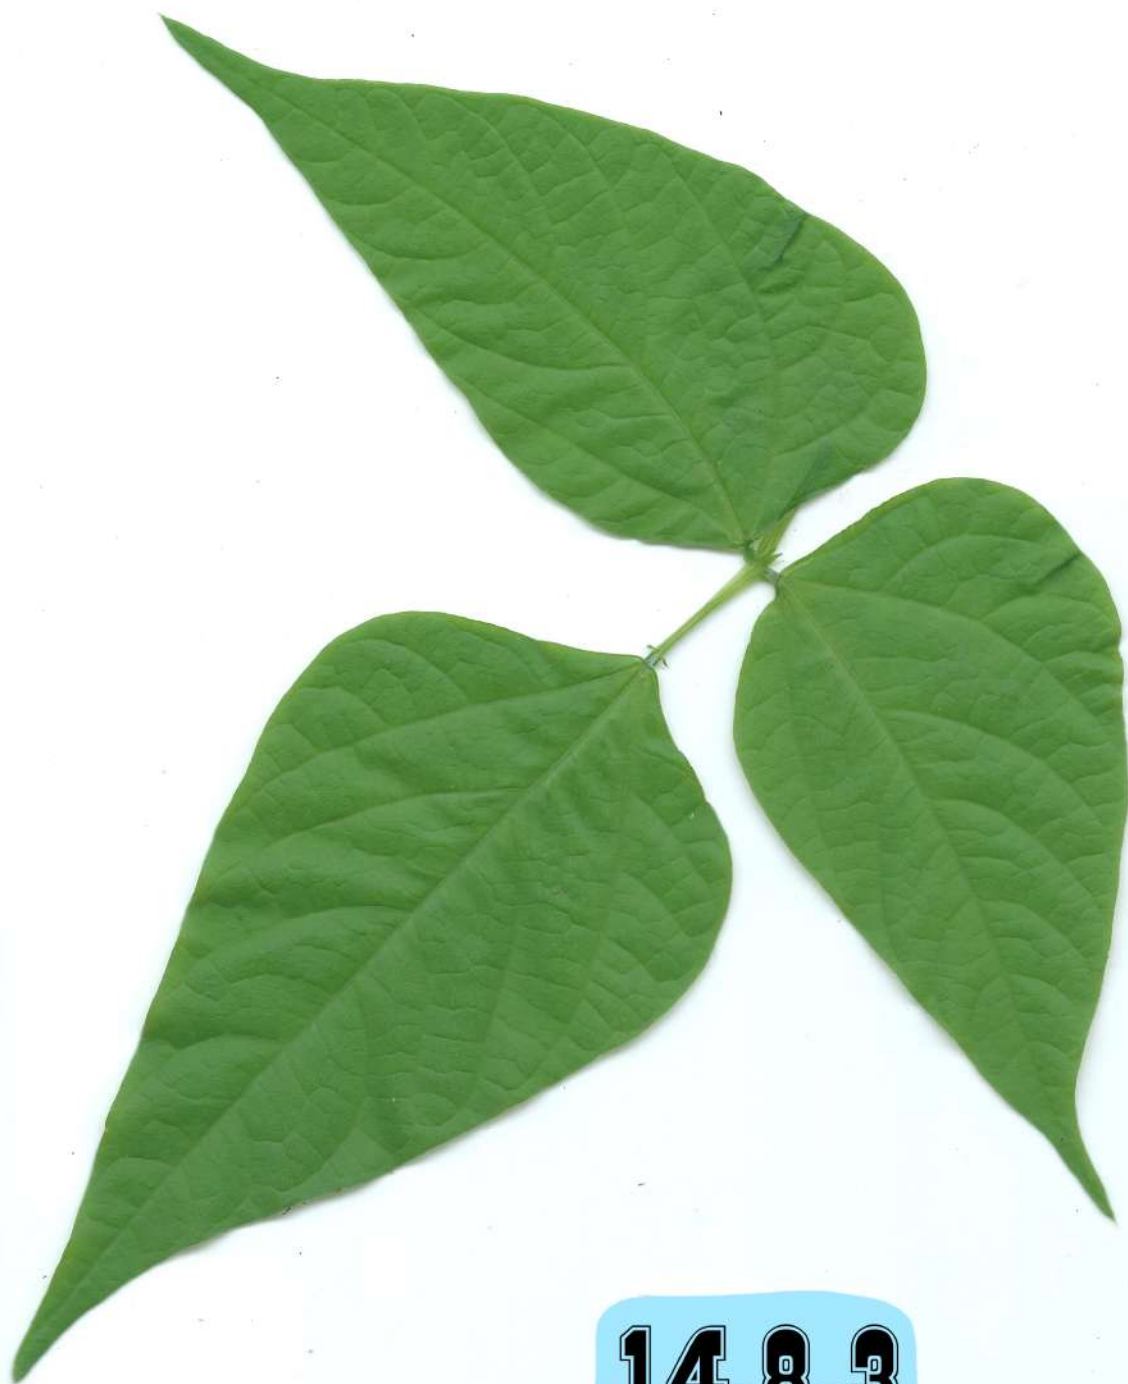

**14-8-3**

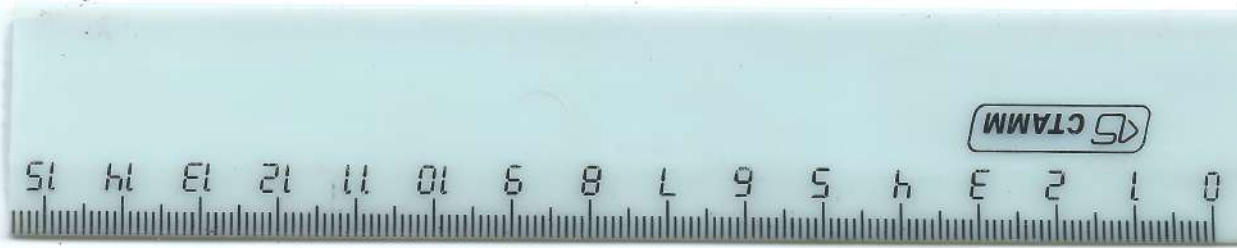



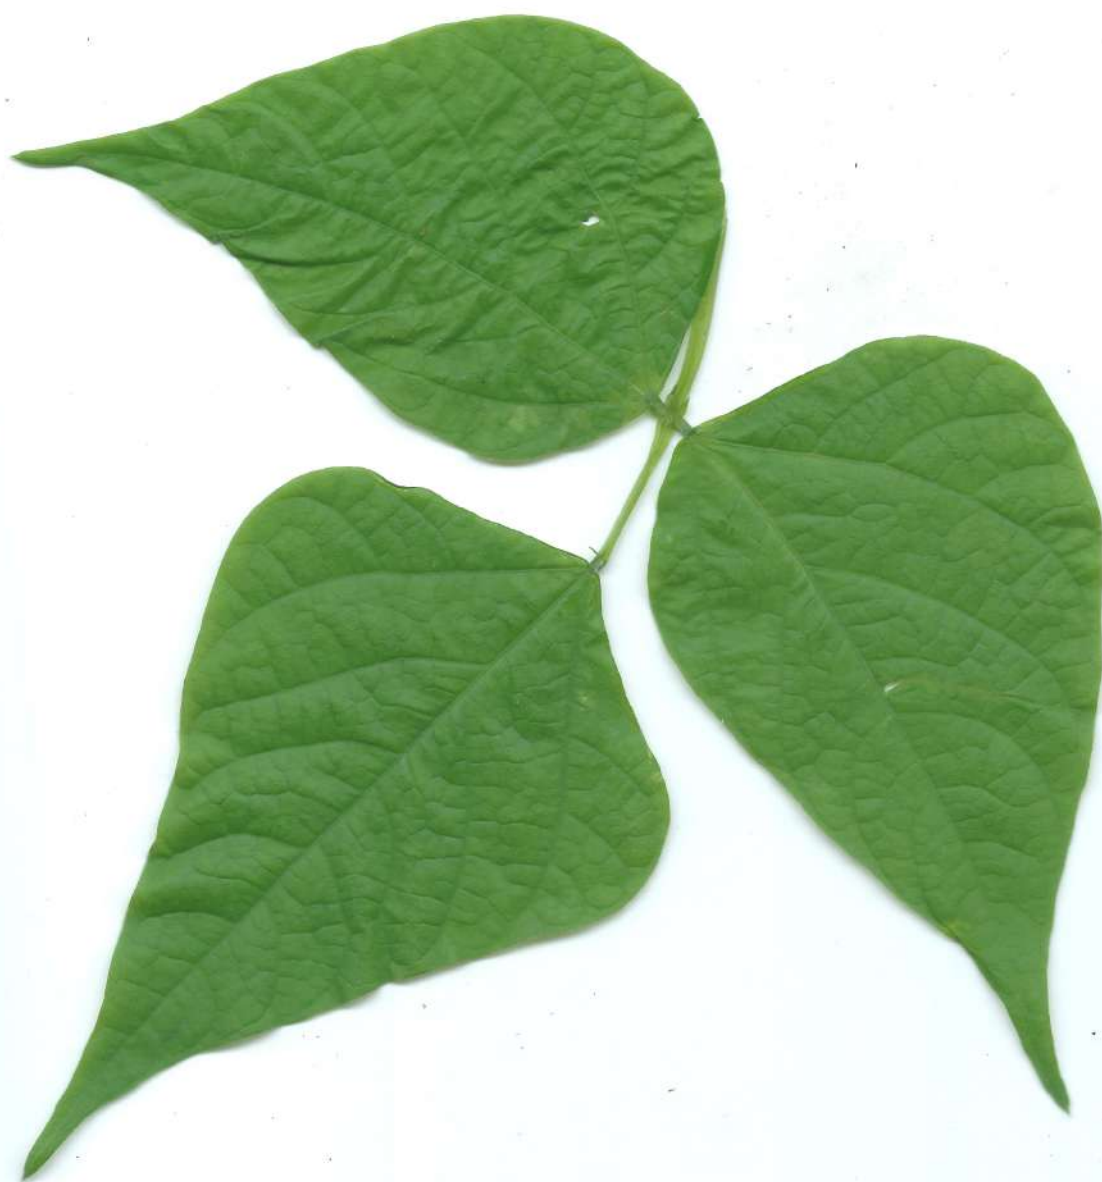

**14-8-2**

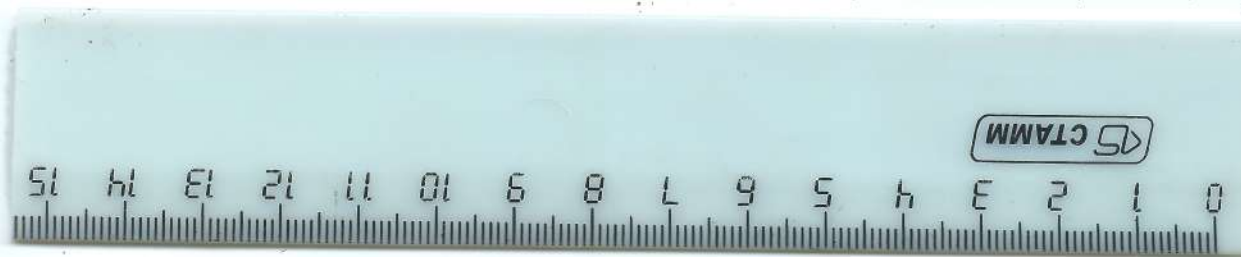

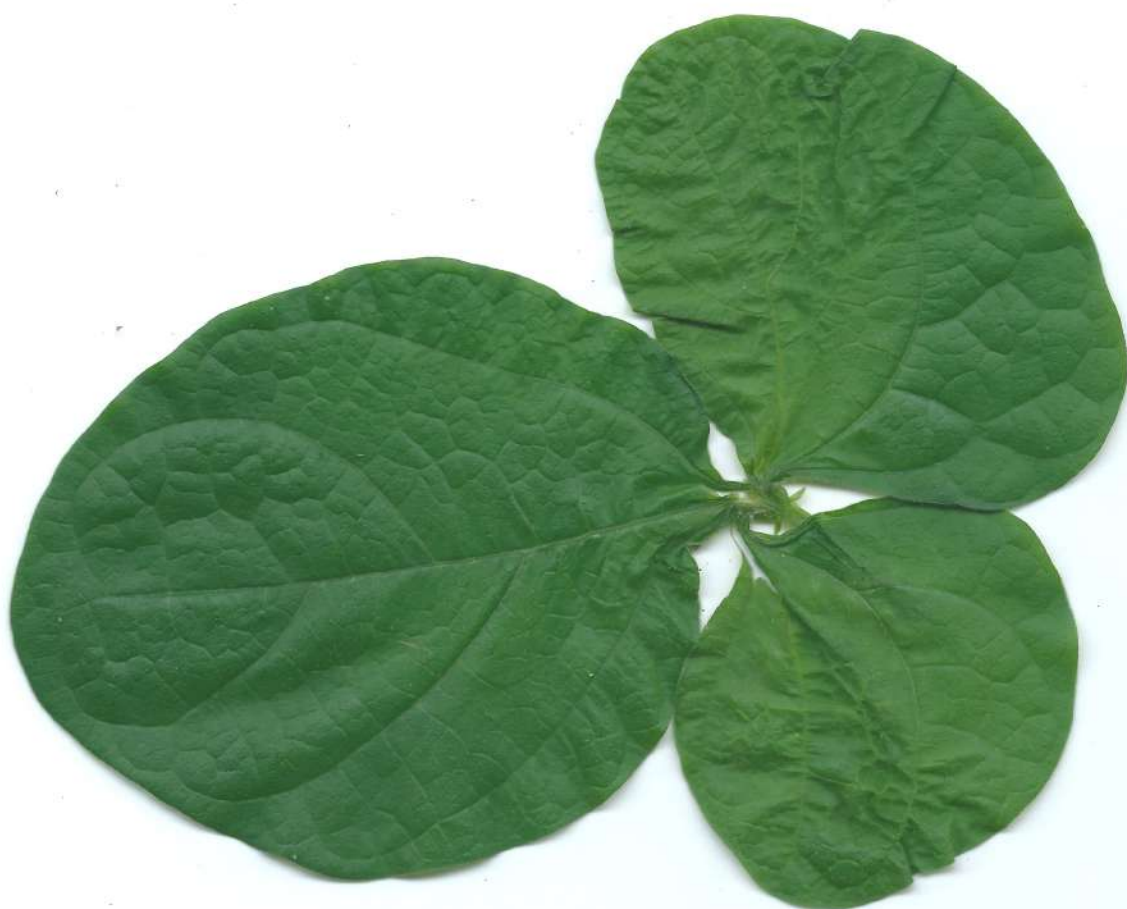

**14-9-1**

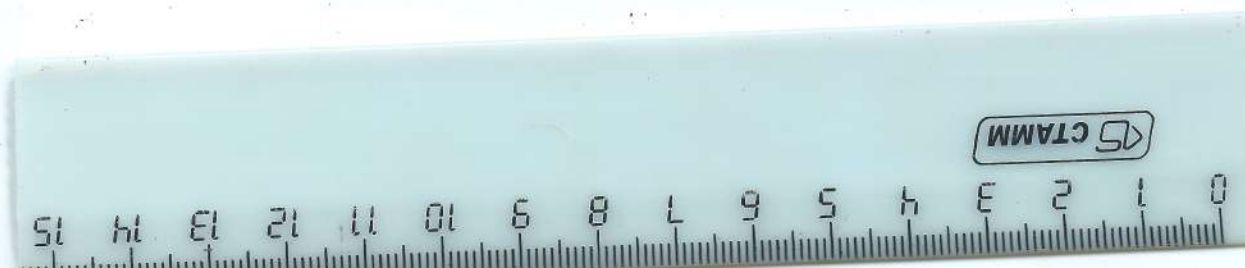

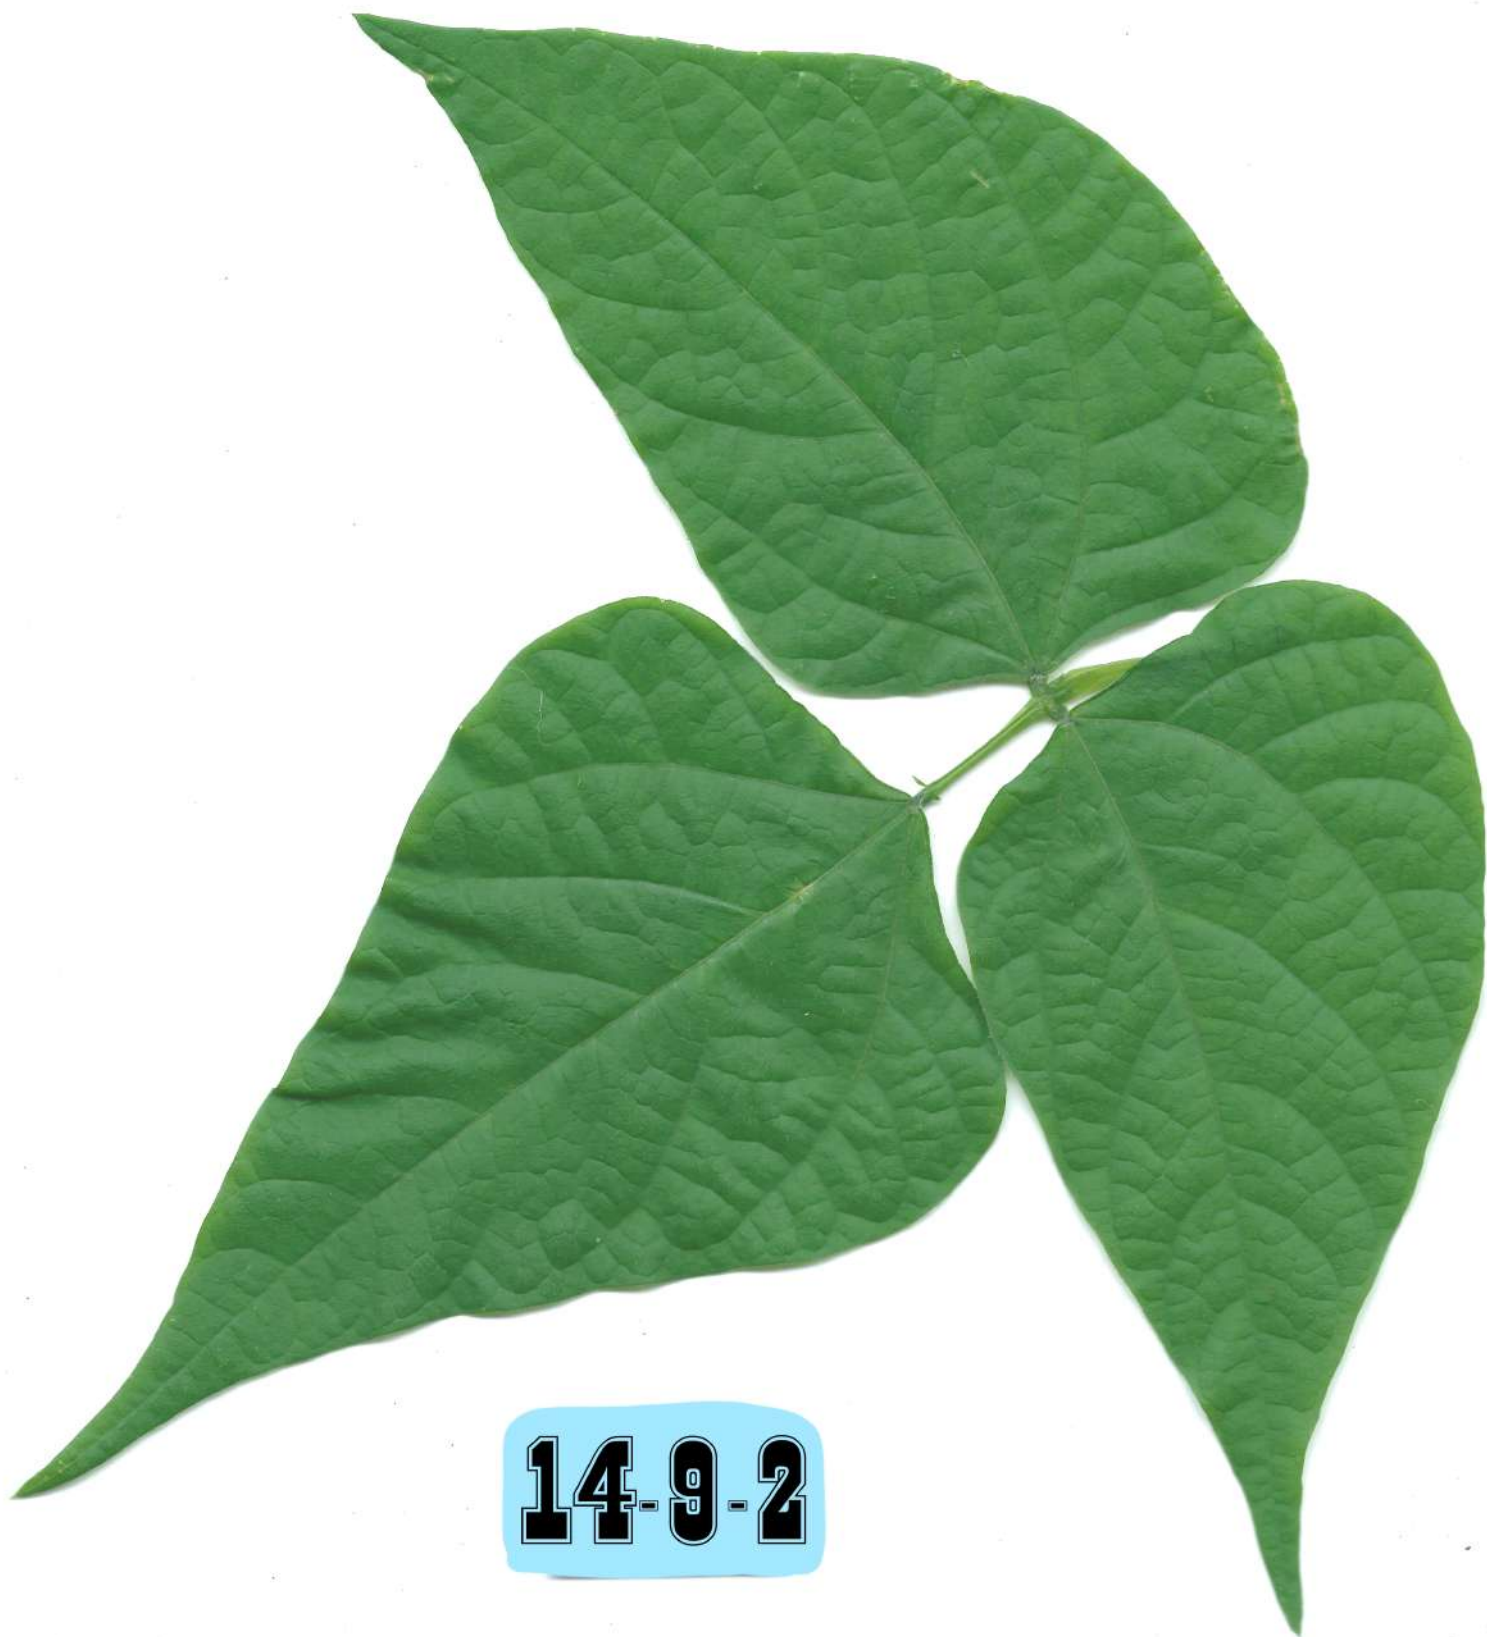

14-9-2

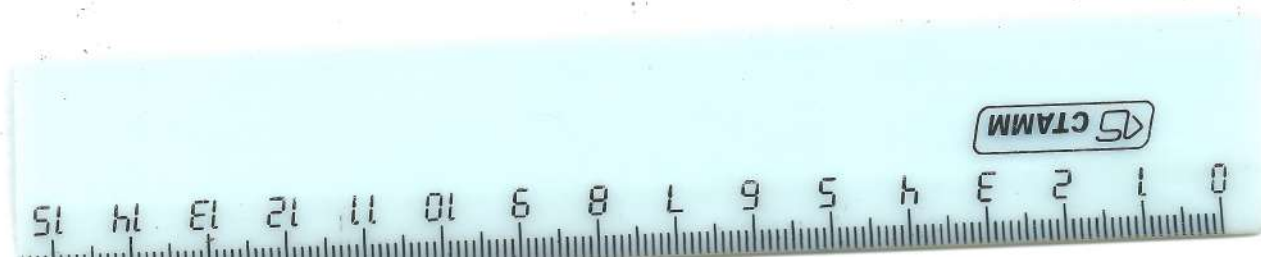



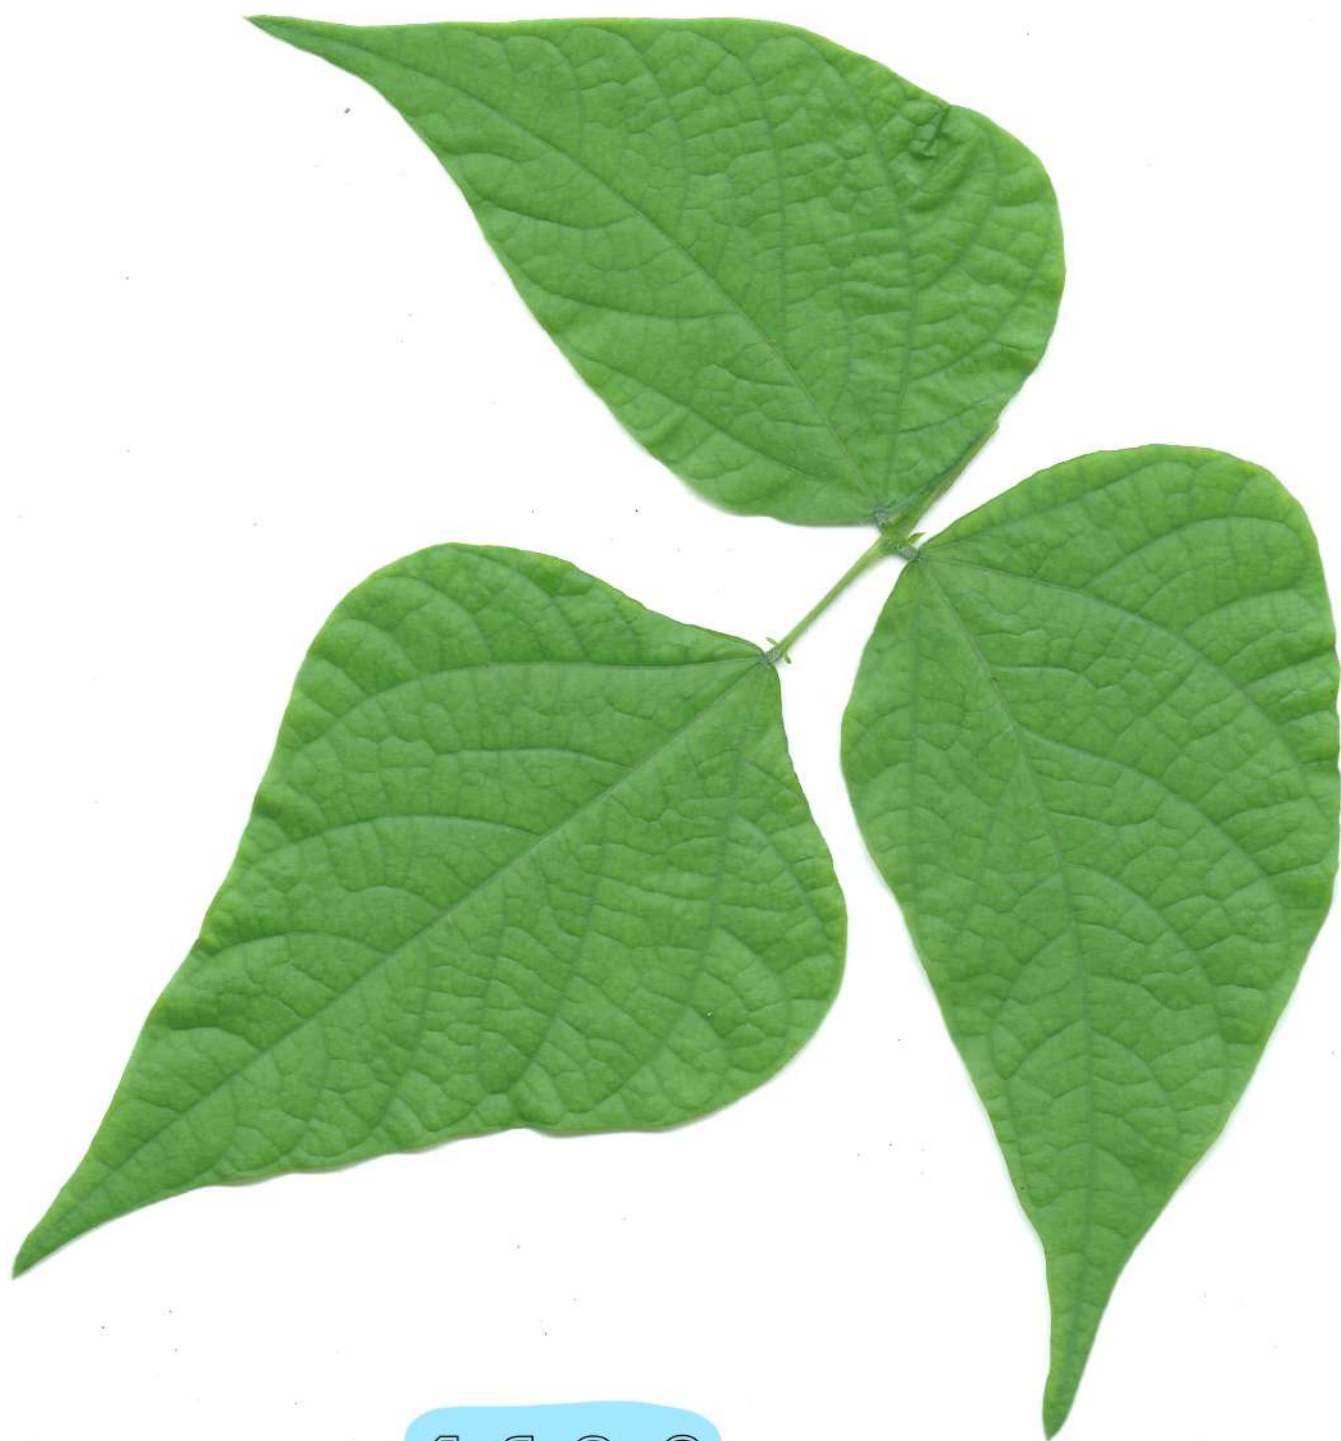

**14-9-3**

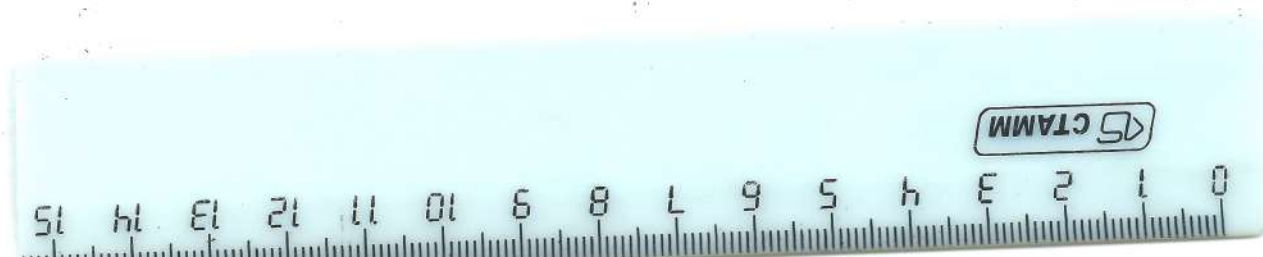



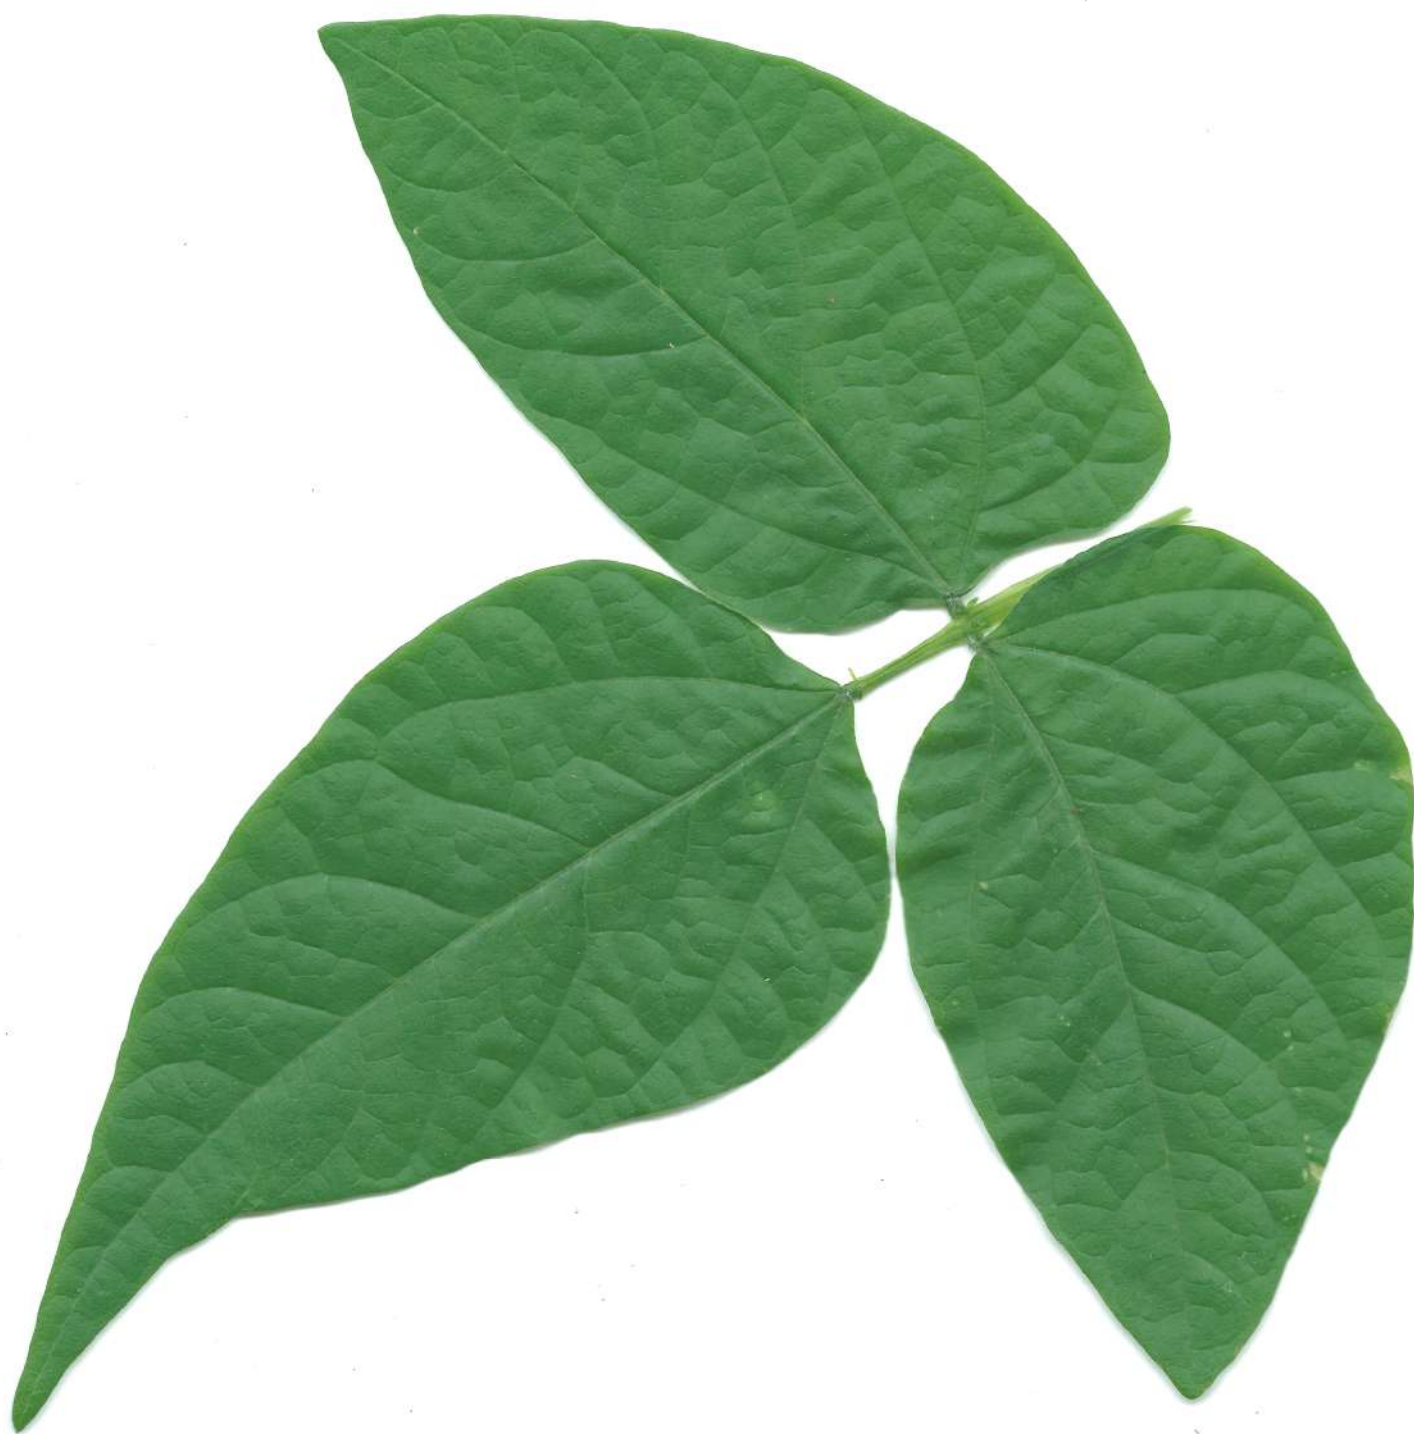

**14-10-3**

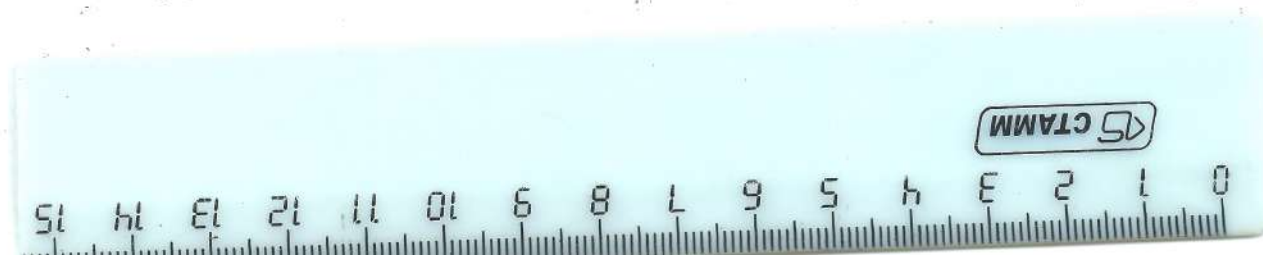

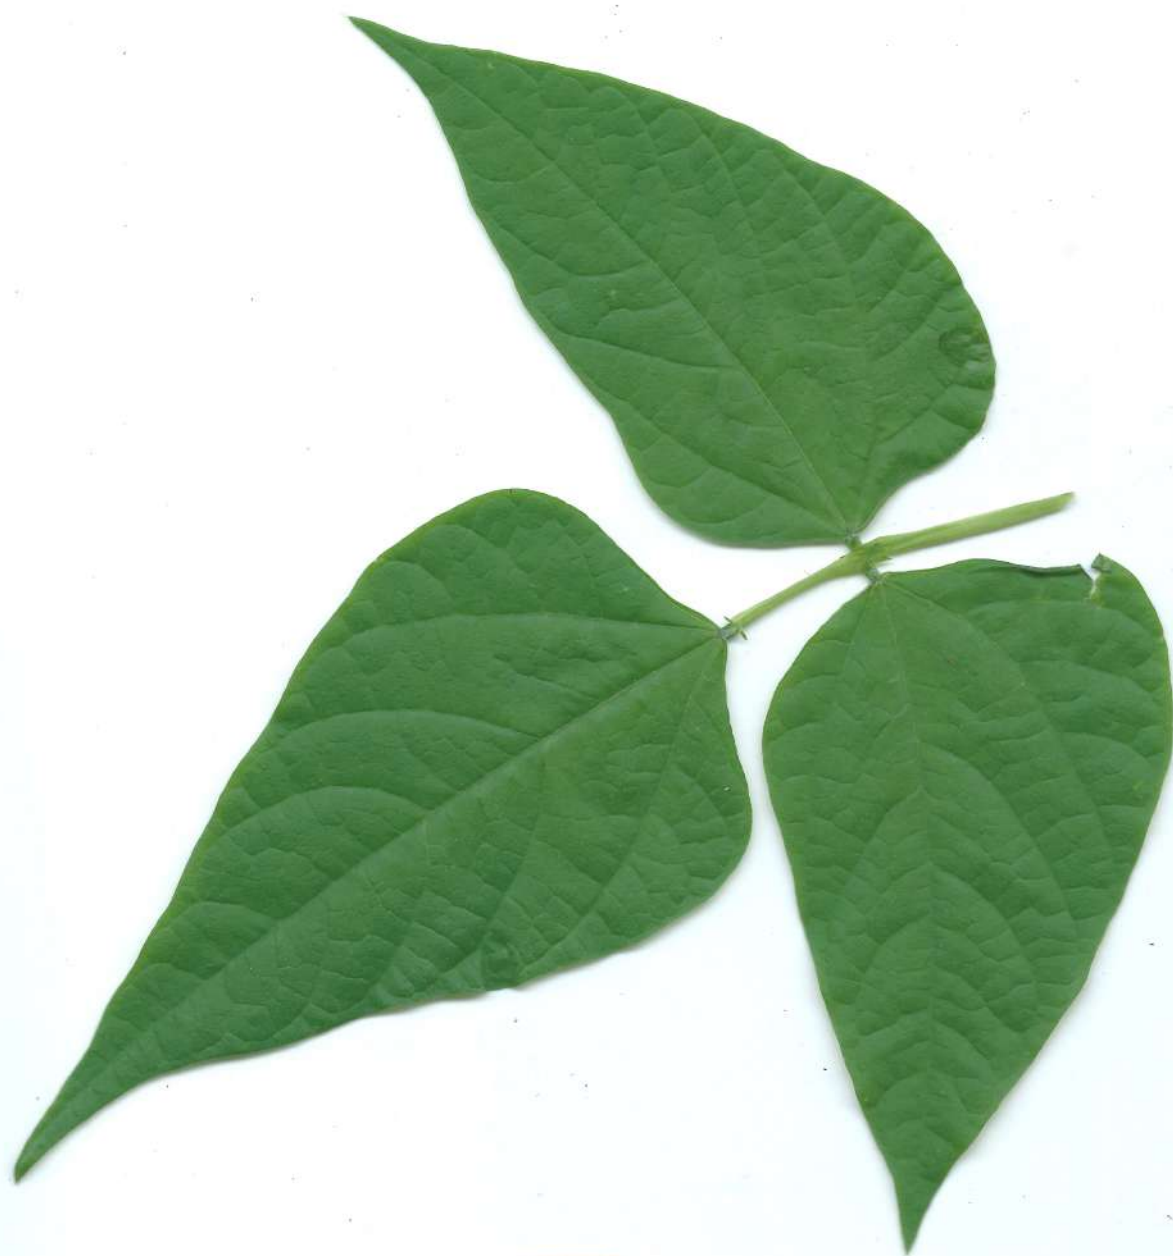

**14-10-2**

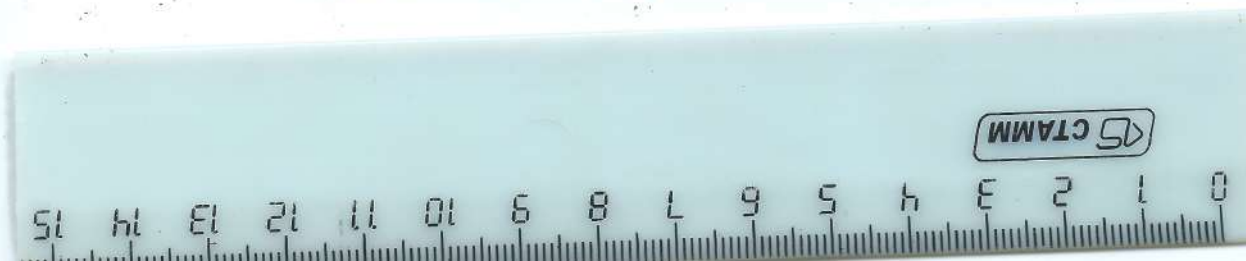

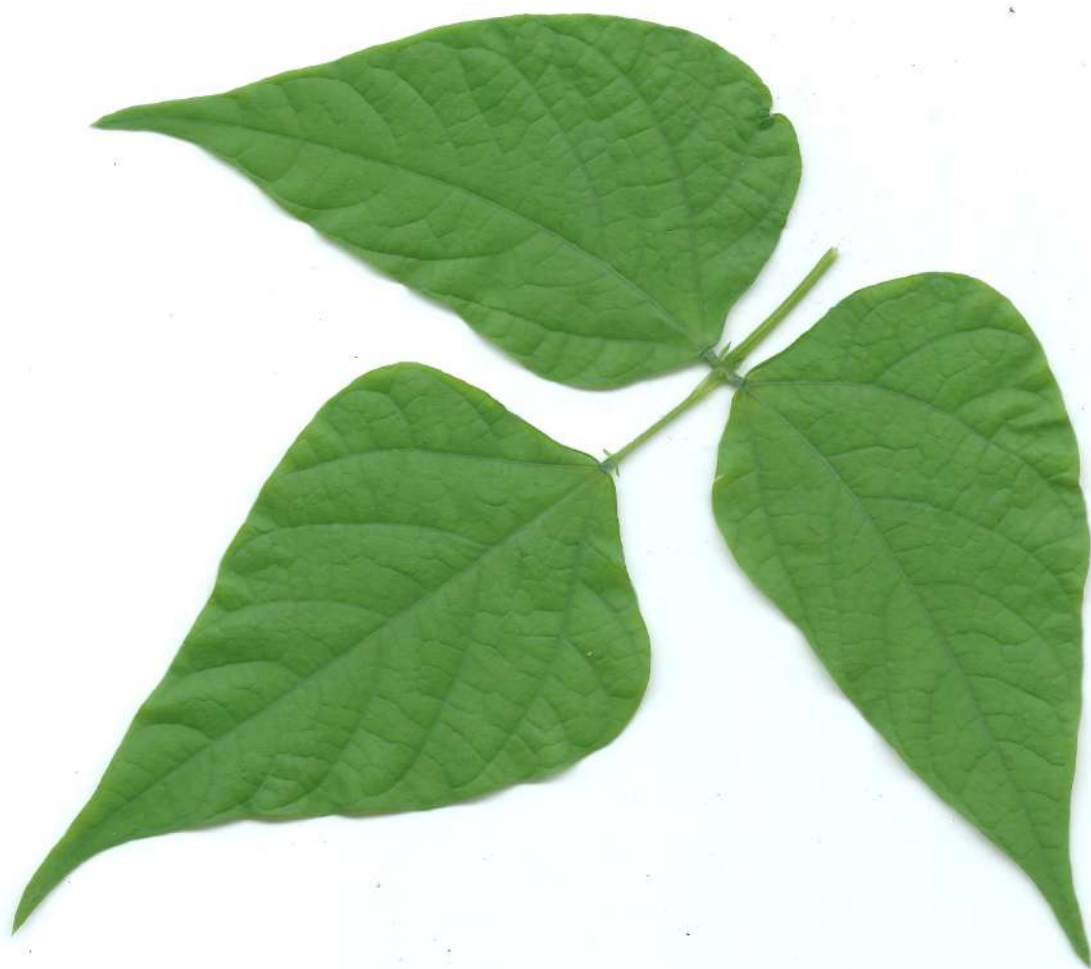

**14-10-1**

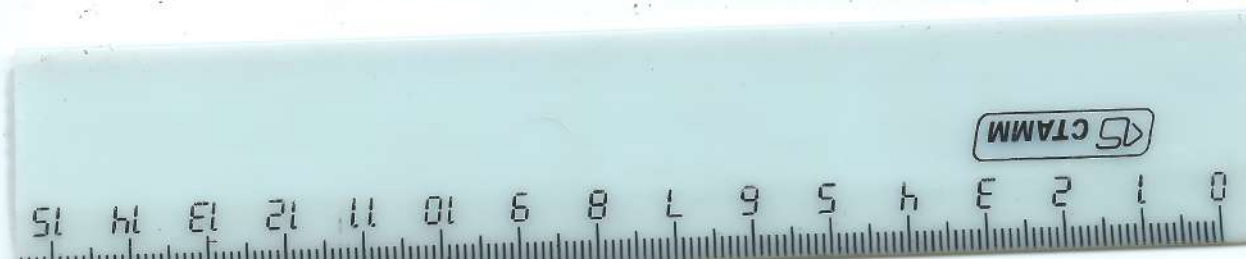



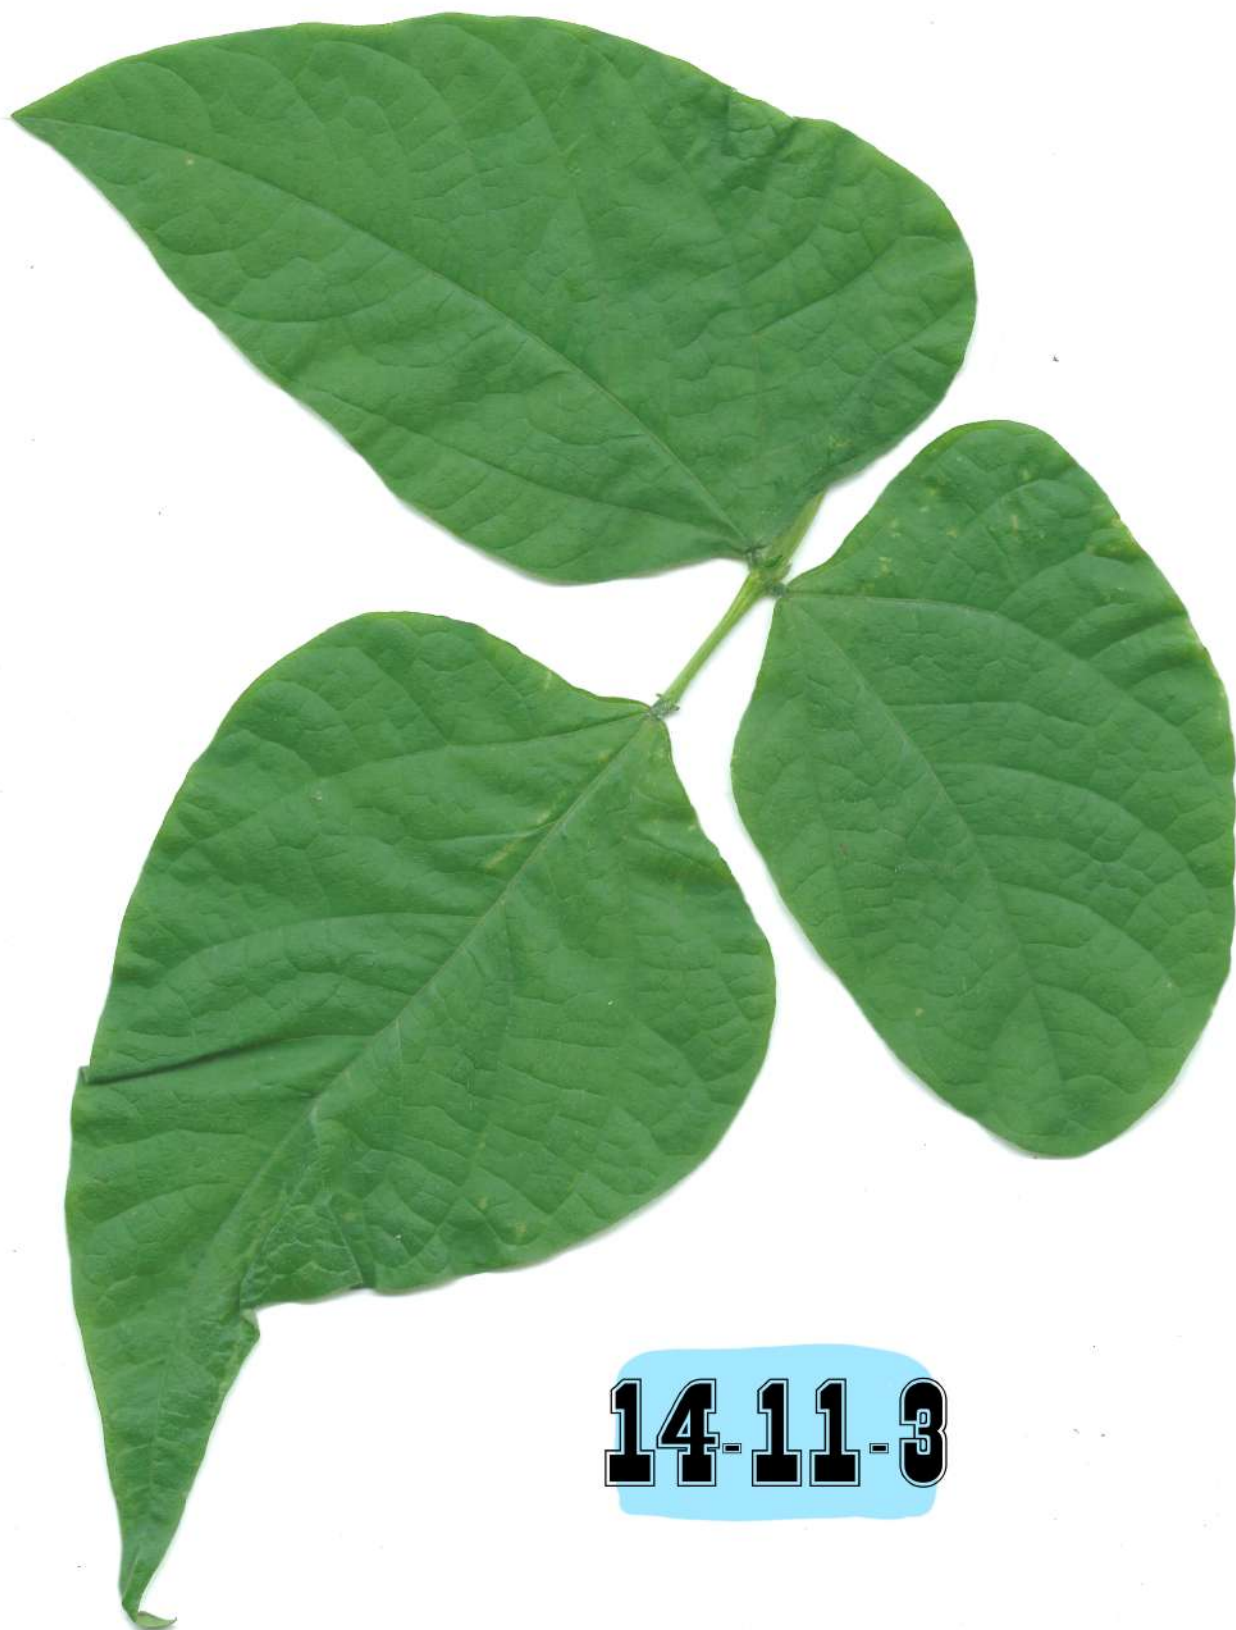

14-11-3

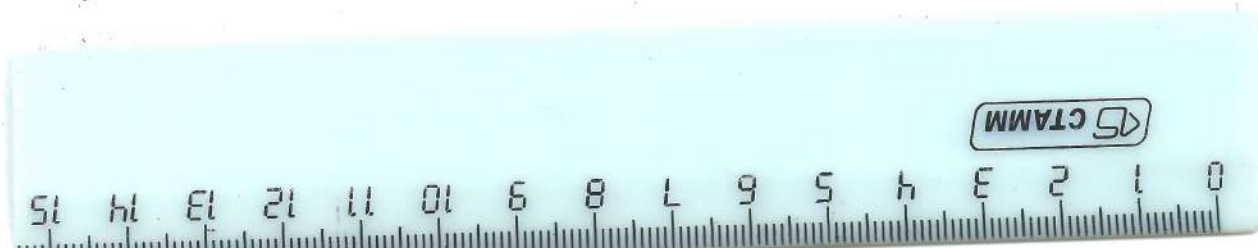



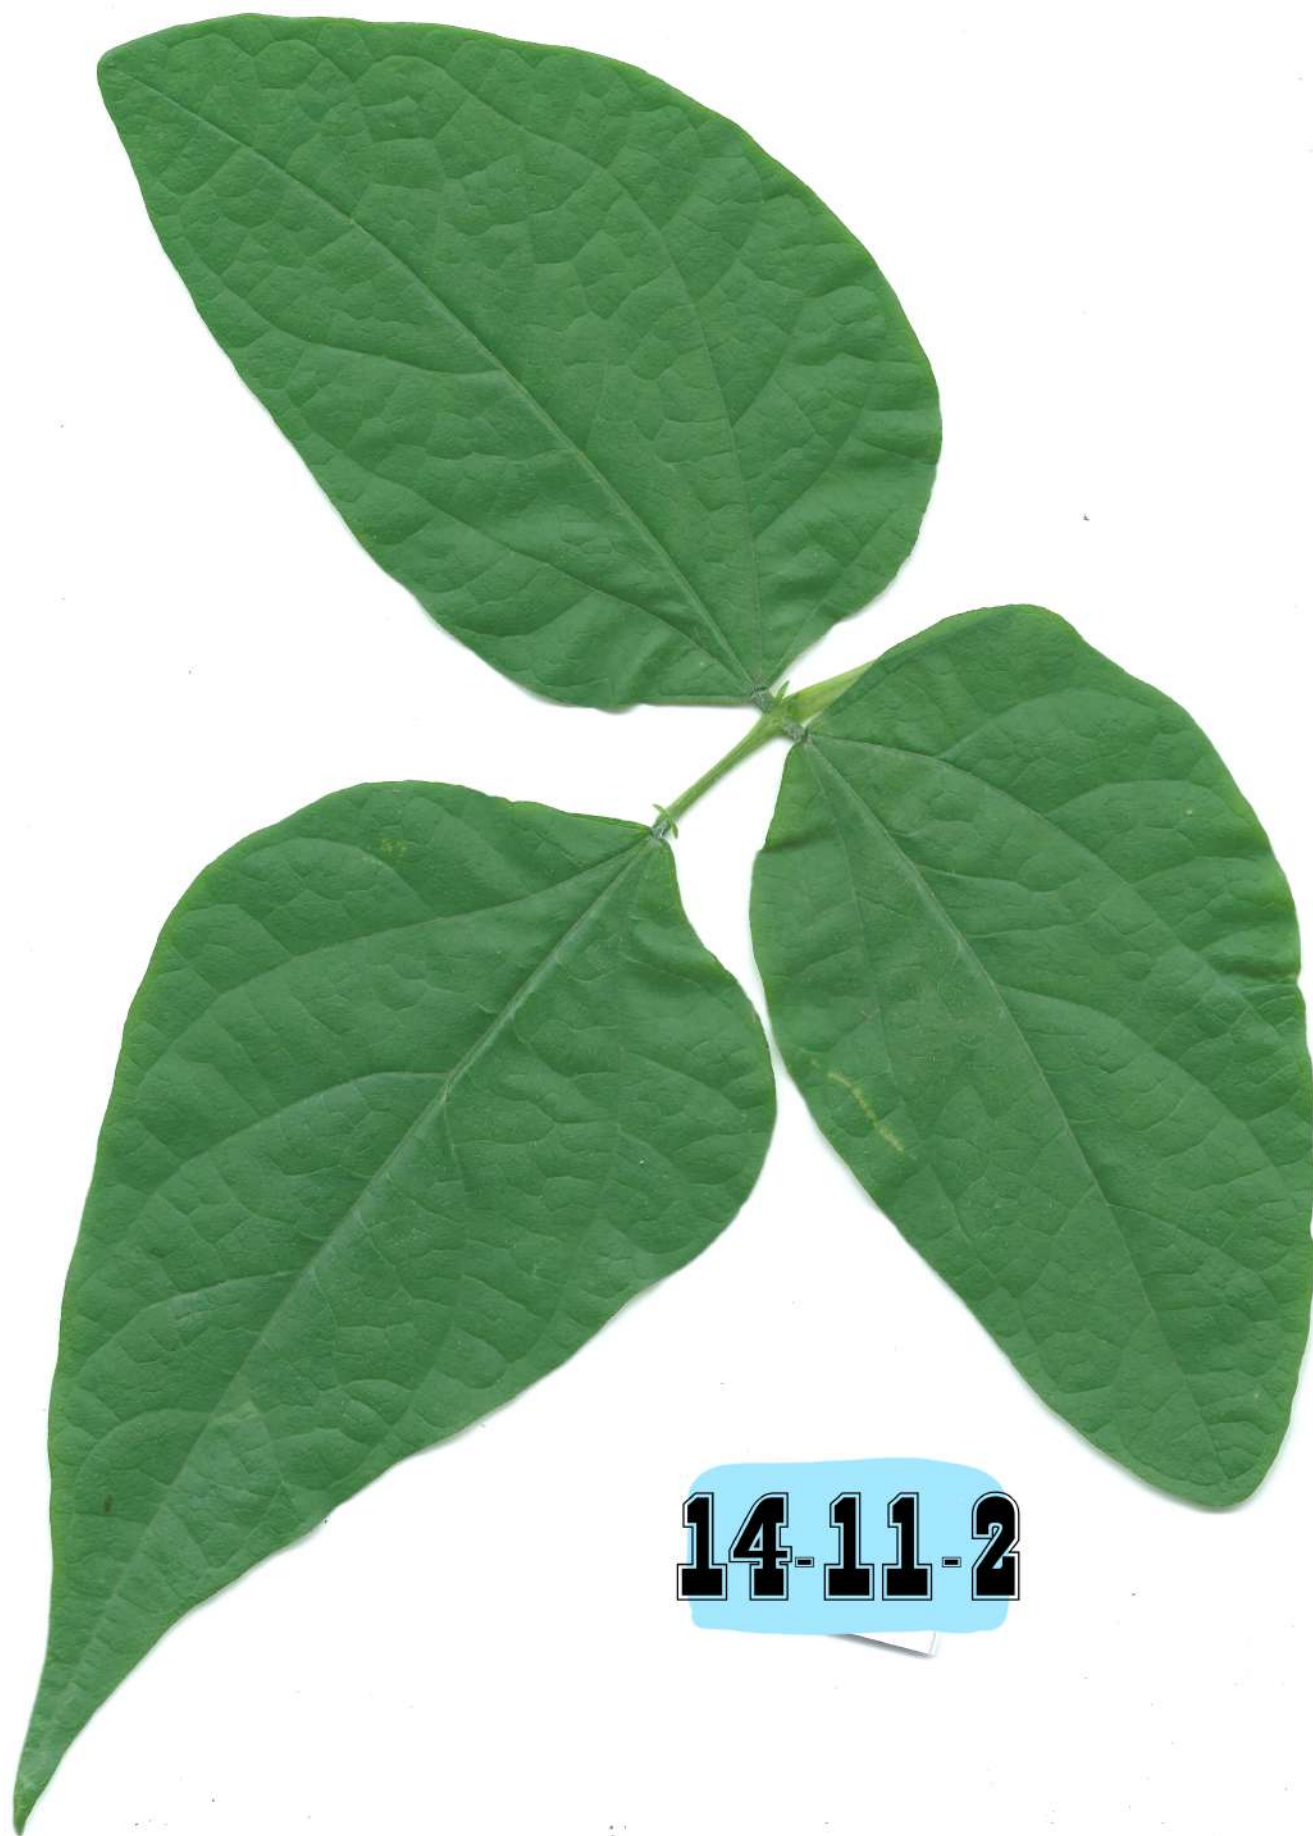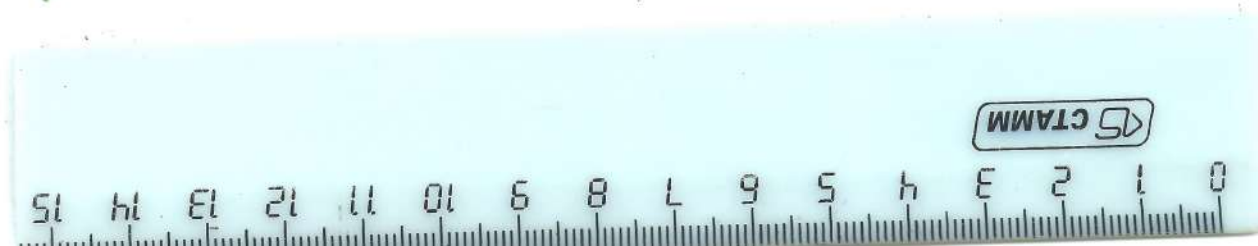

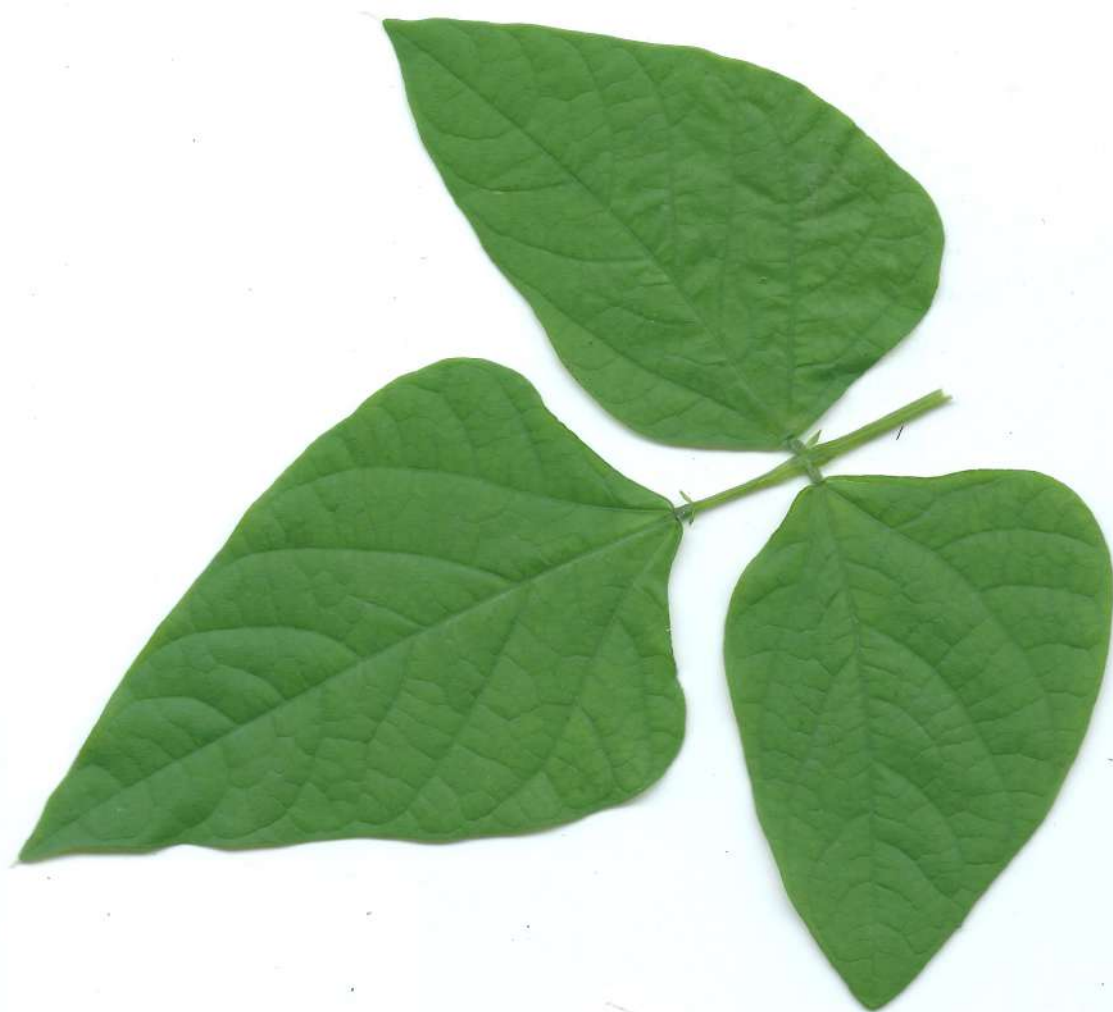

**14-11-1**

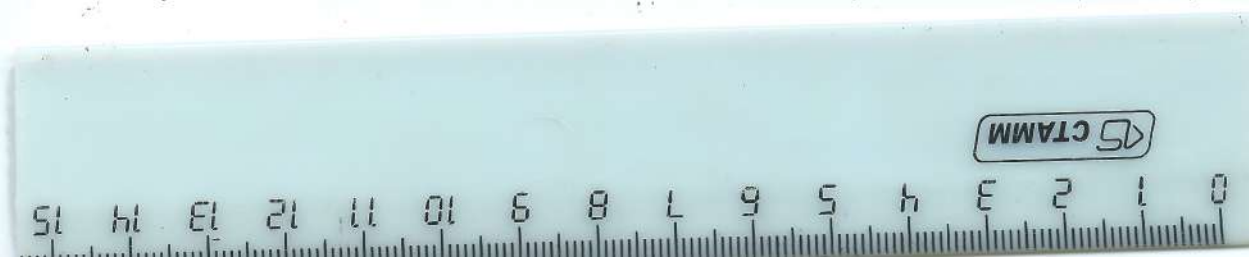

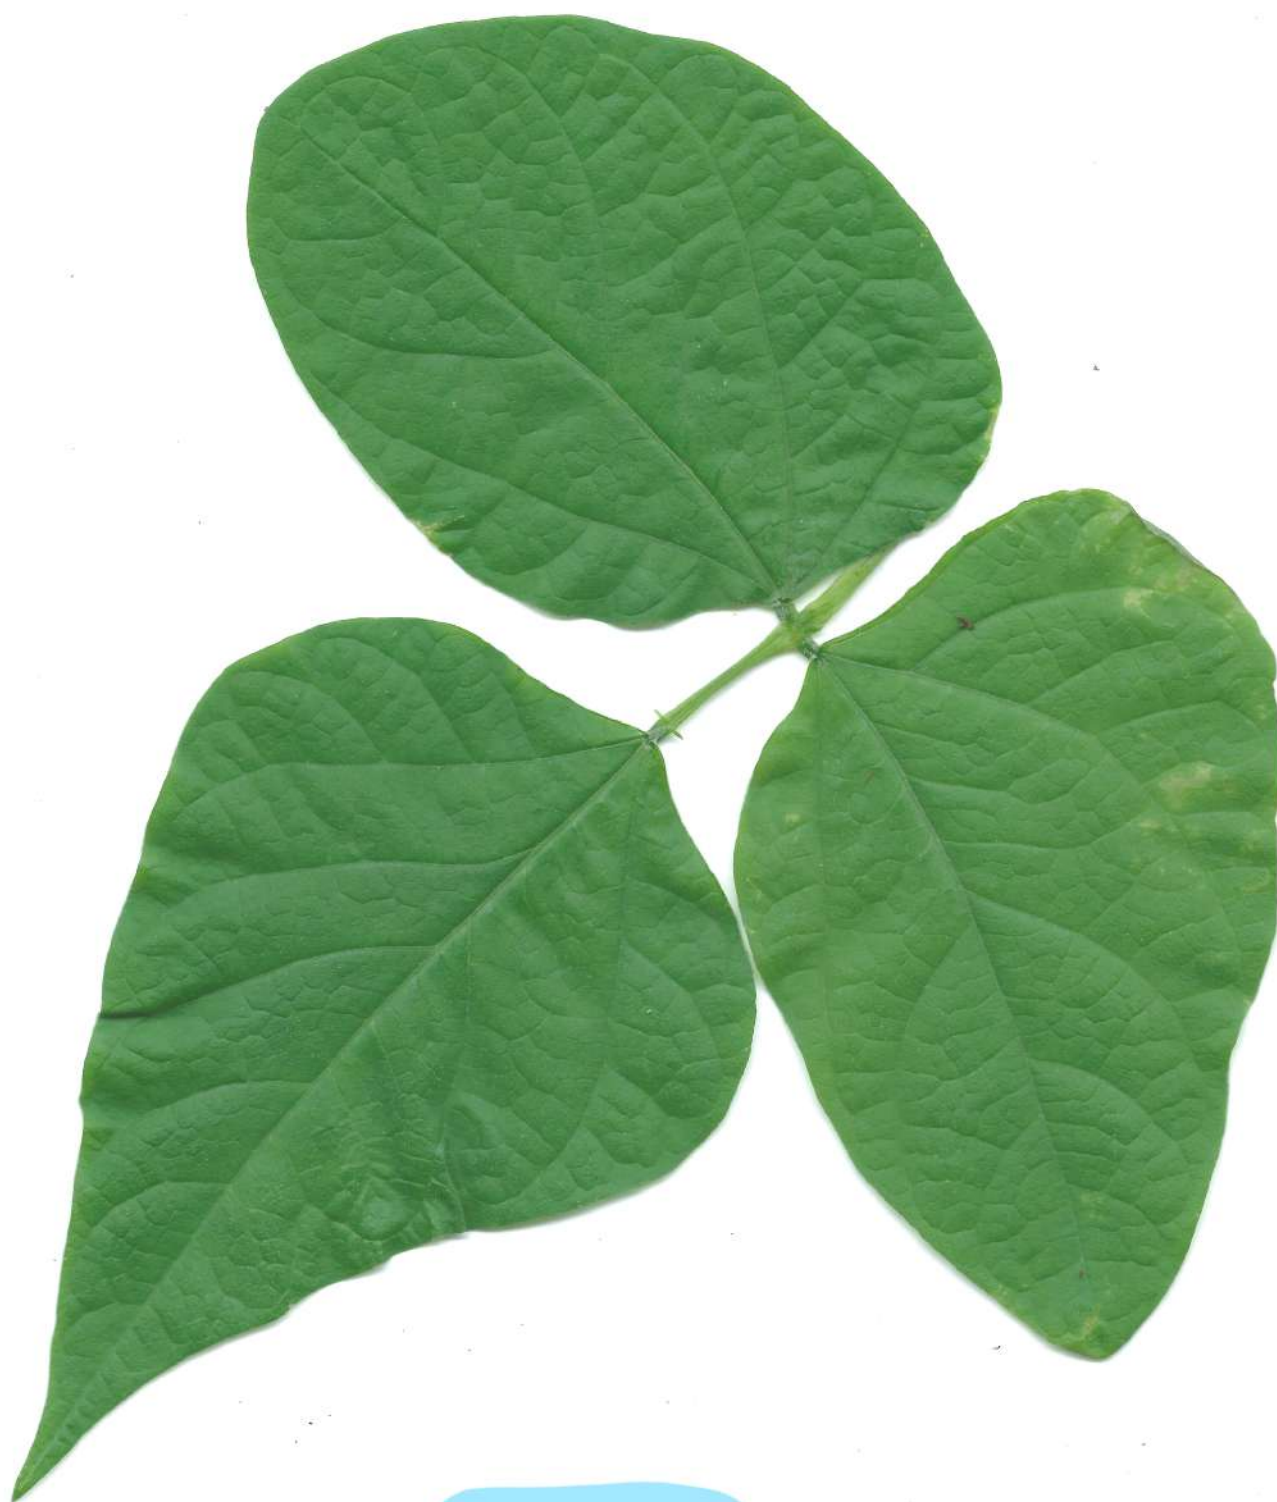

**14-12-3**

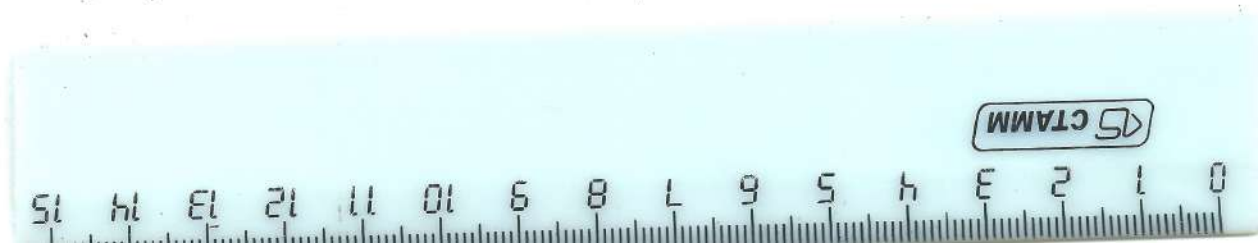



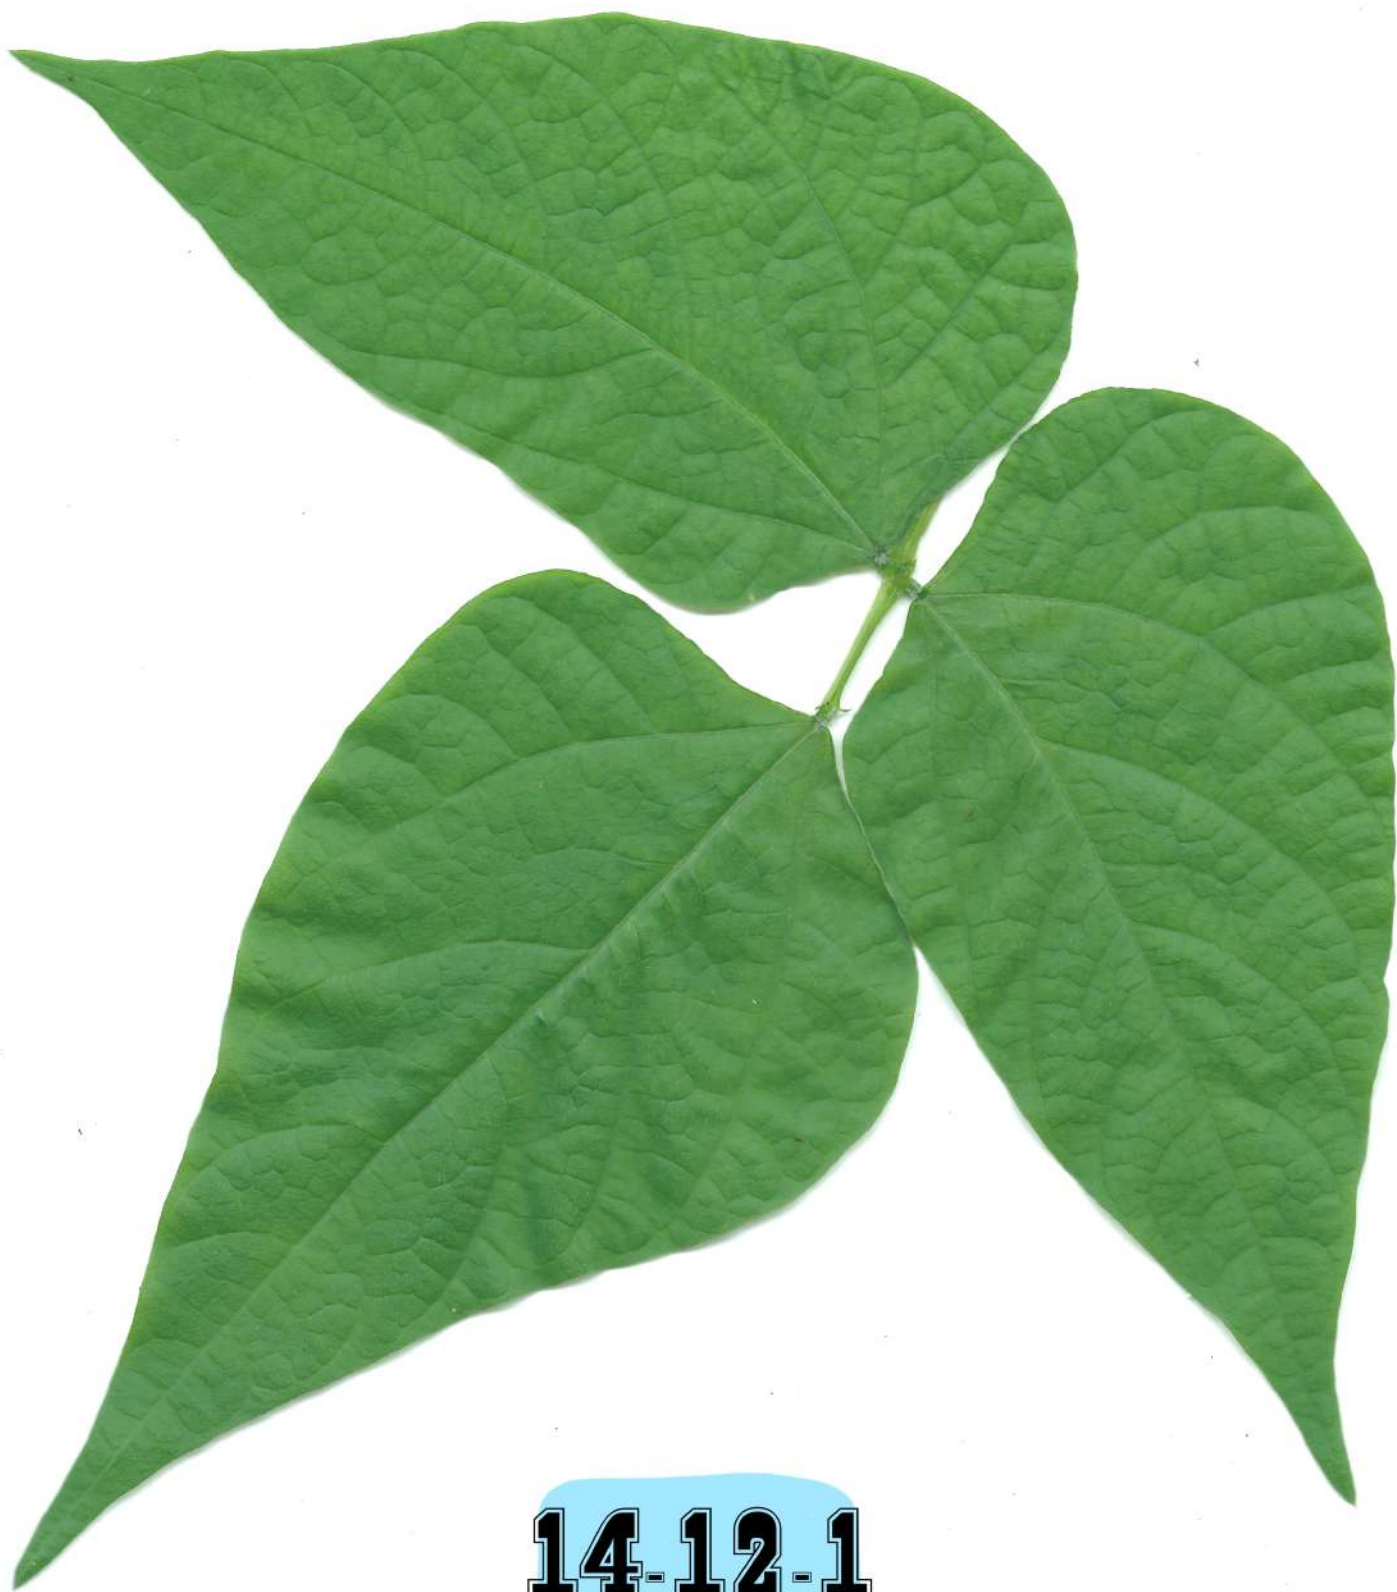

**14-12-1**

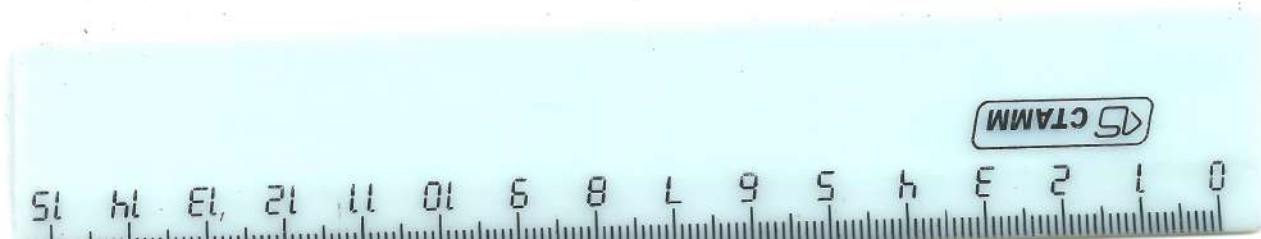



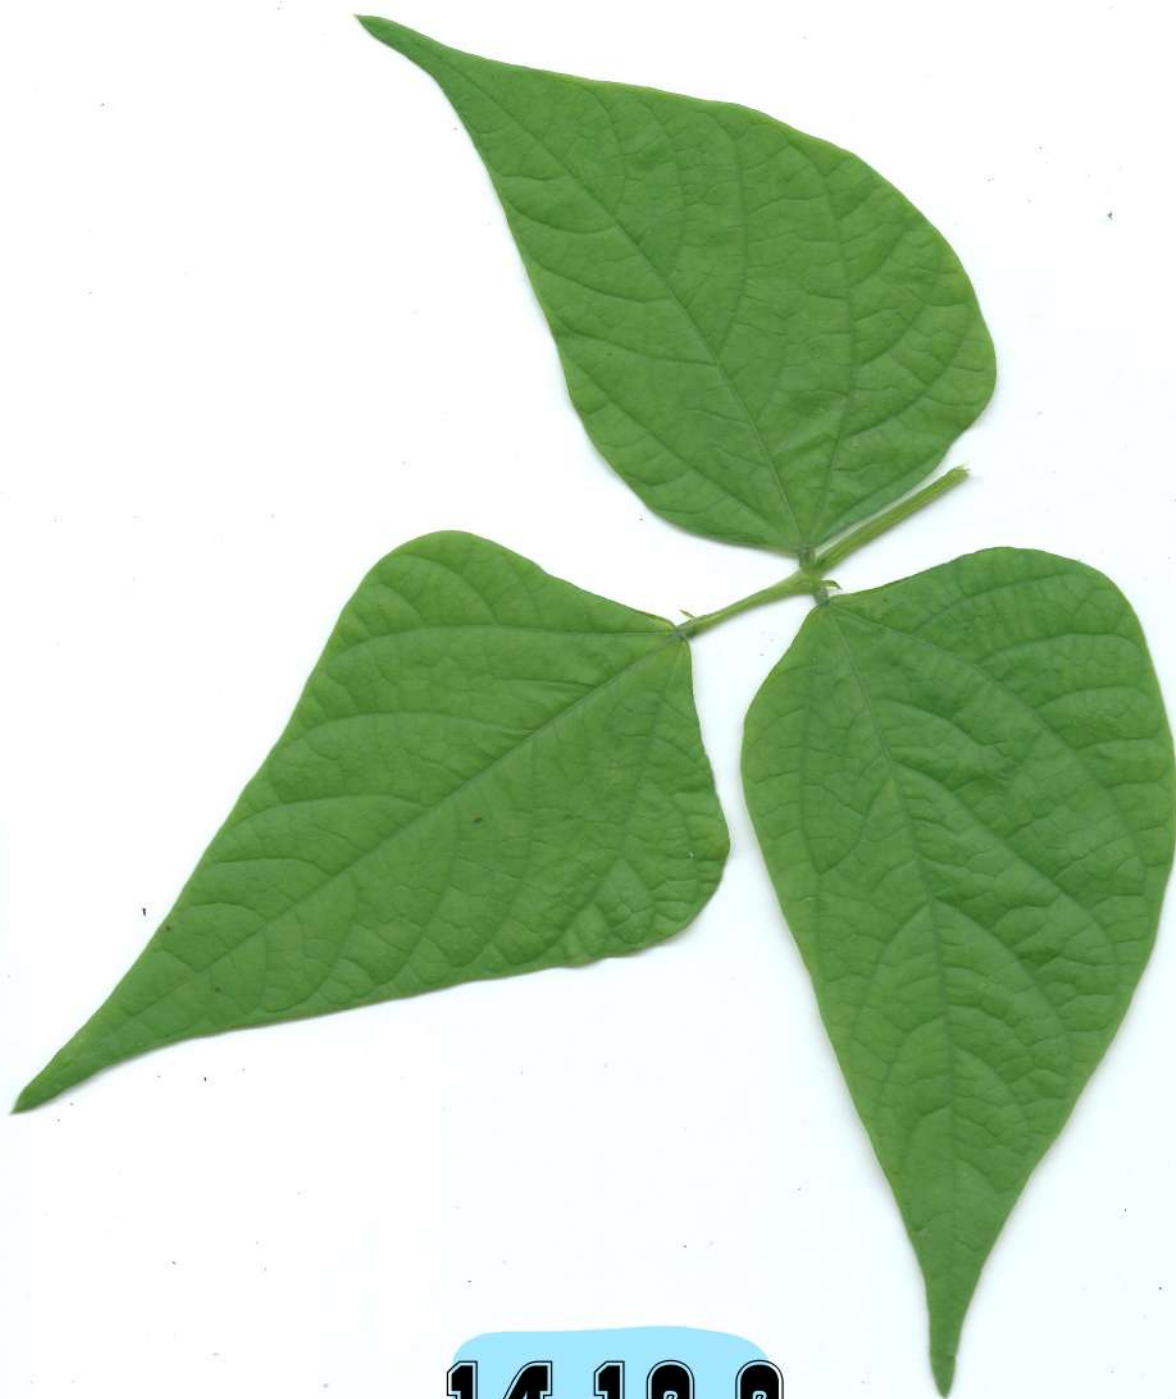

**14-12-2**

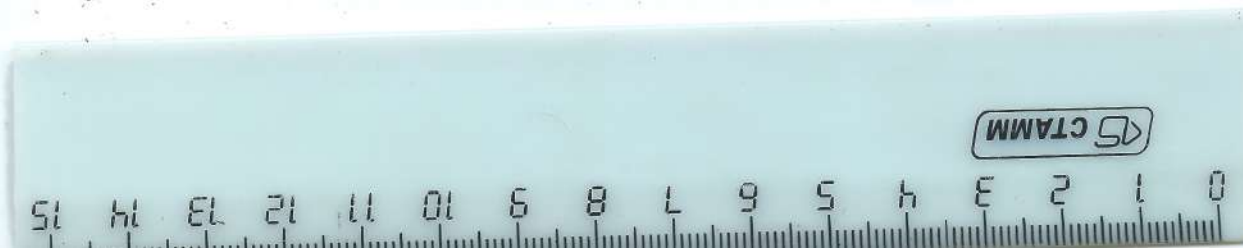

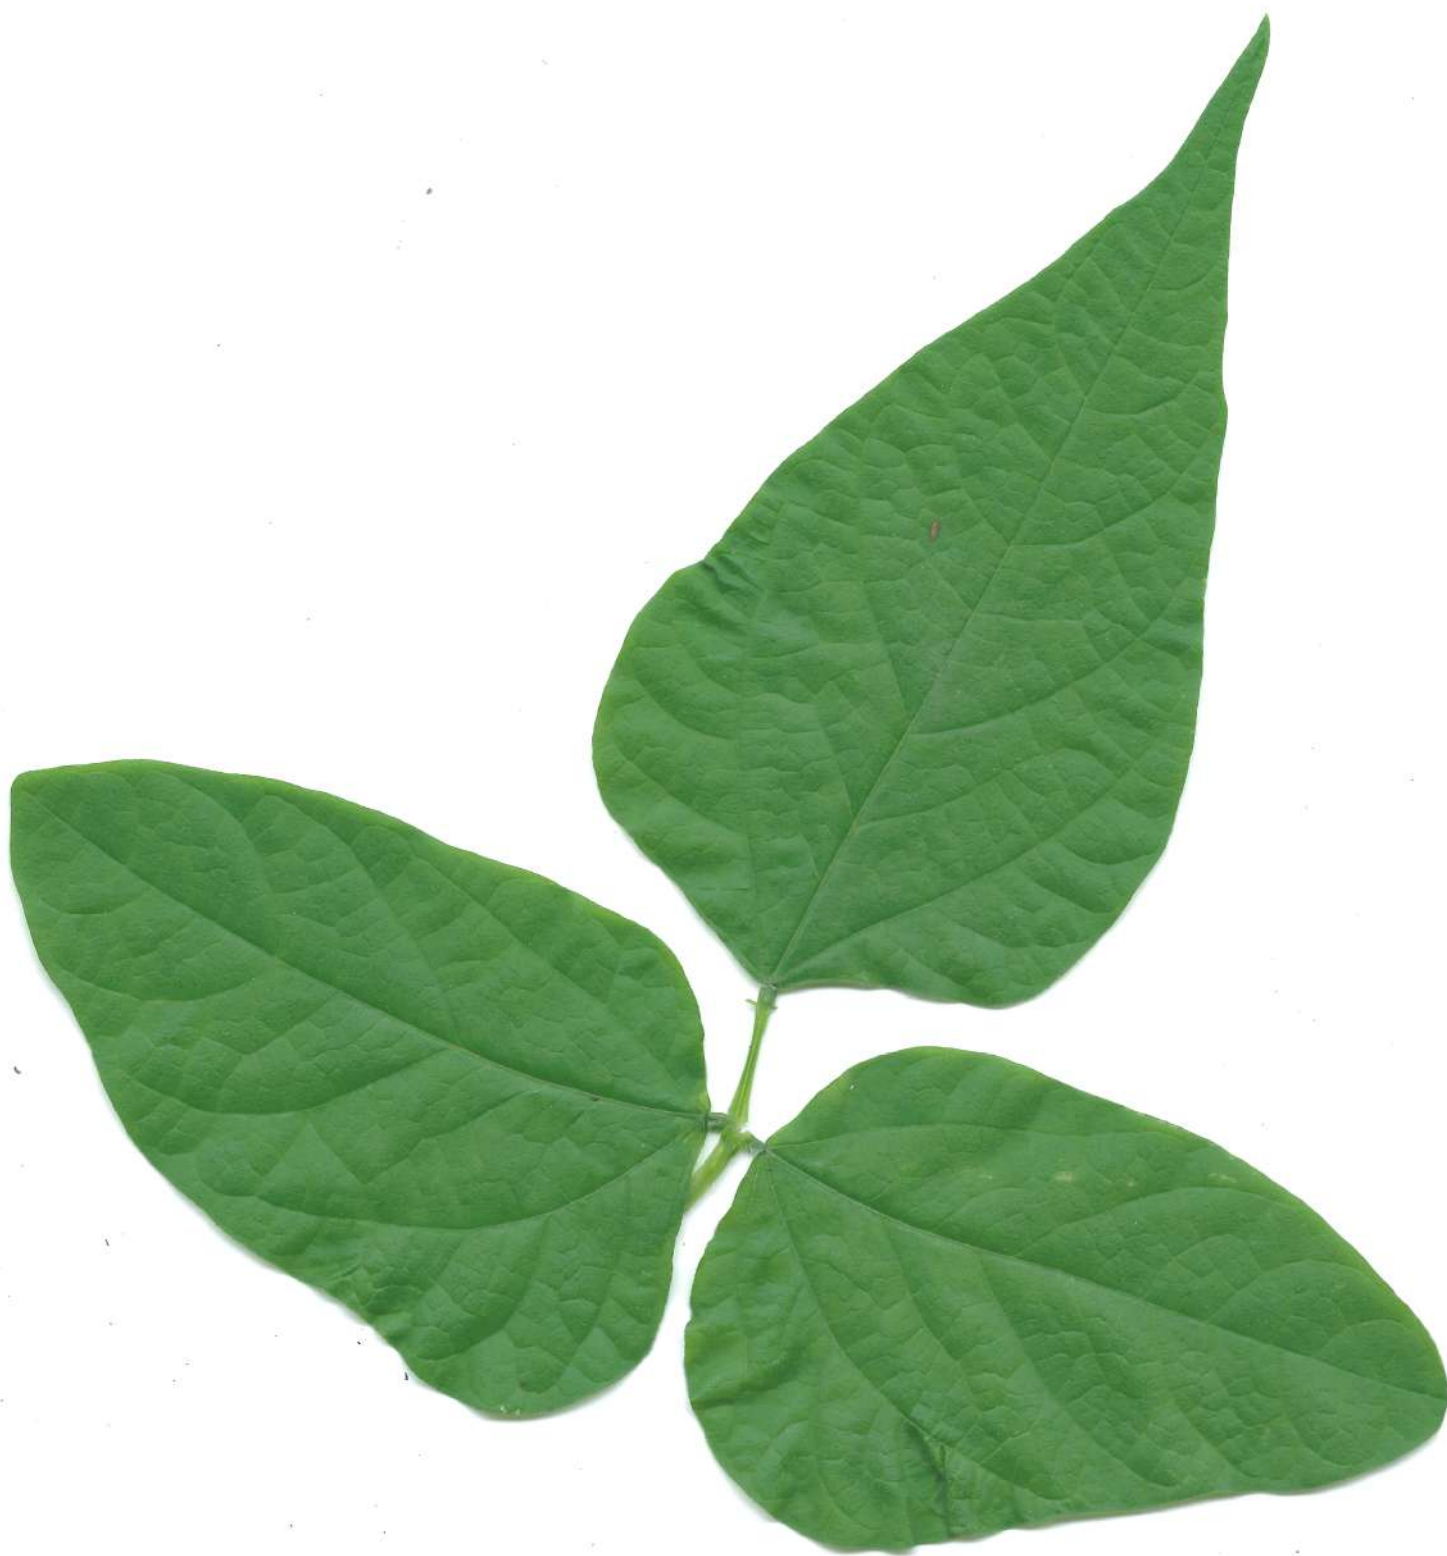

**14-13-3**

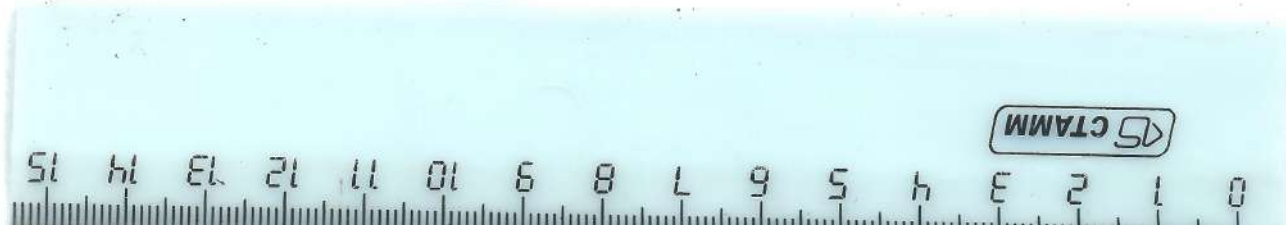

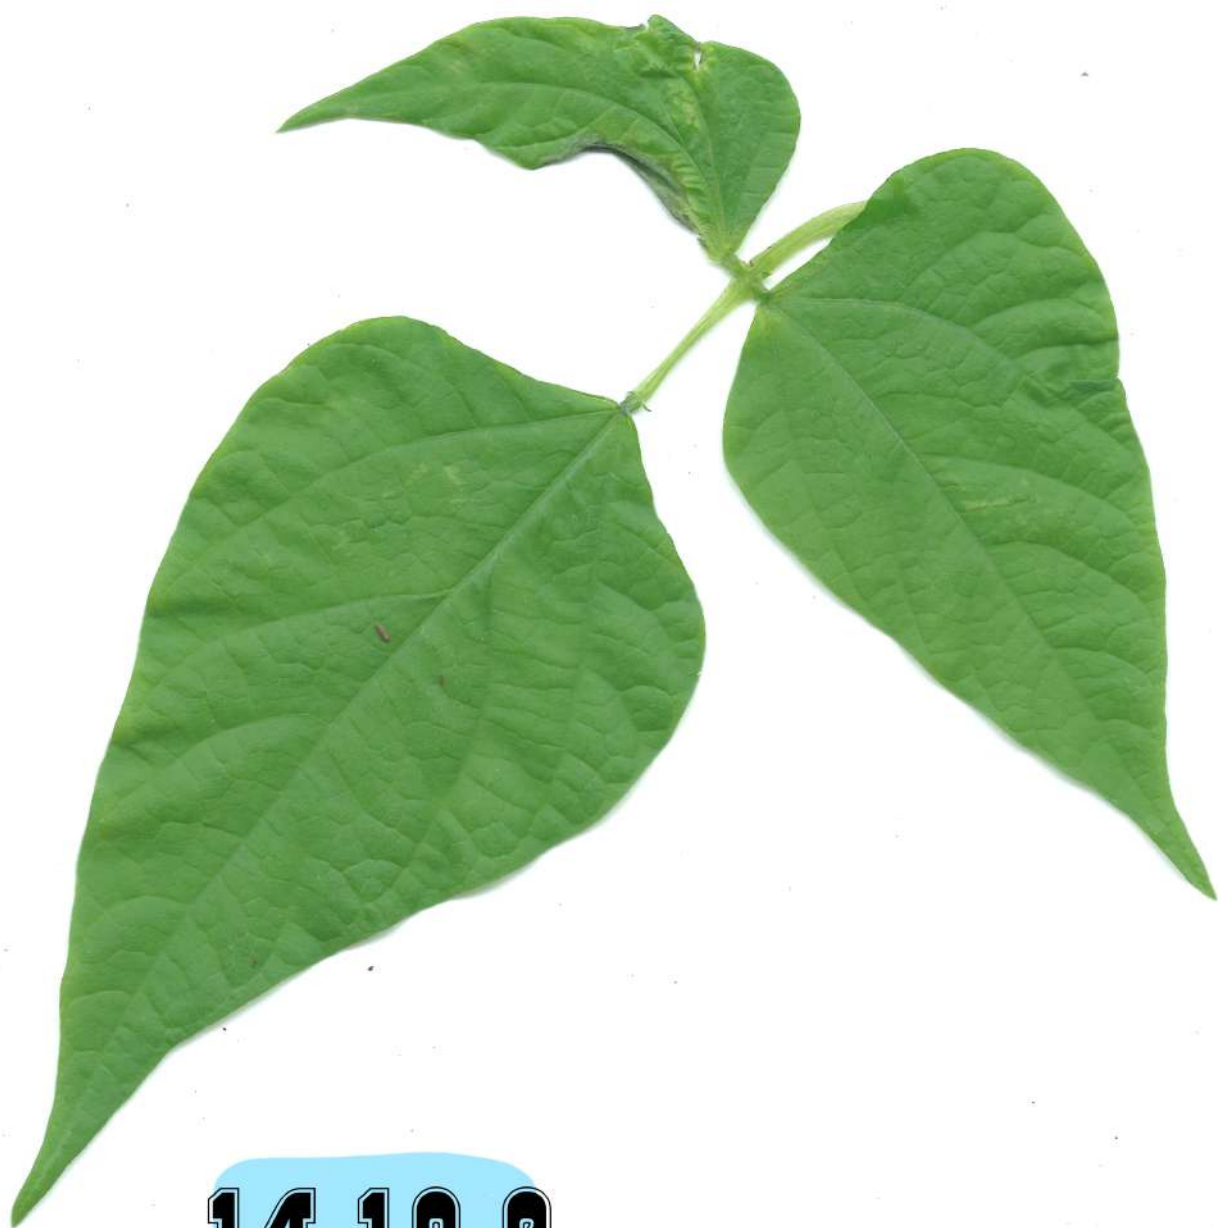

**14-13-2**

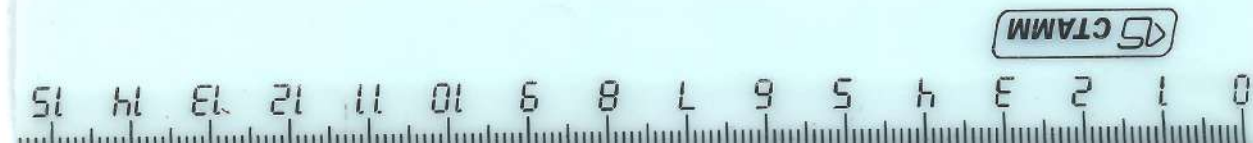

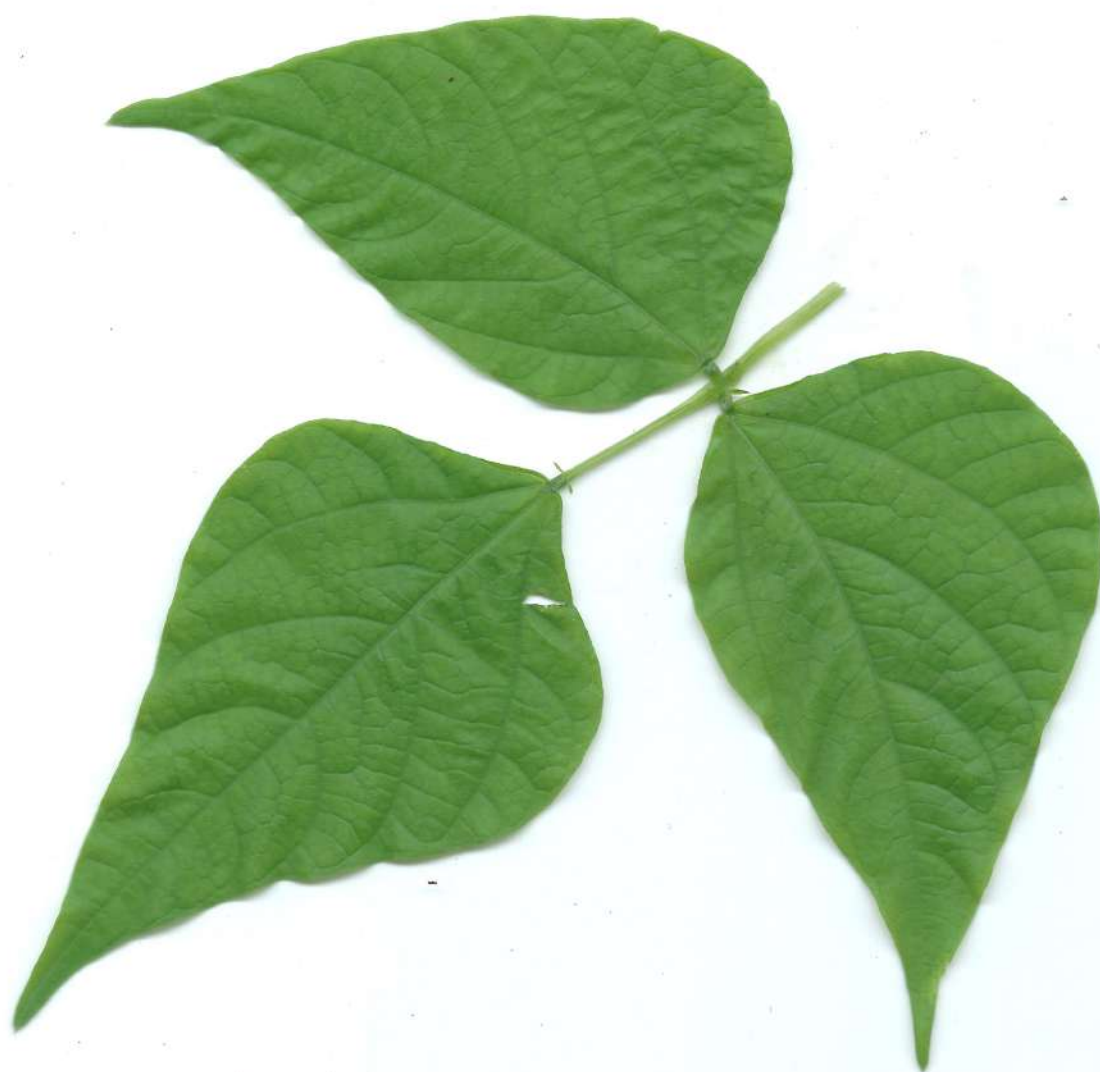

**14-13-1**

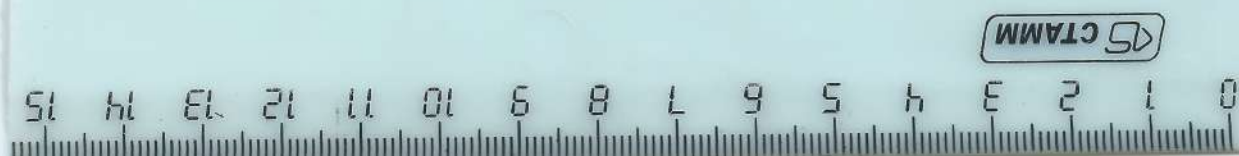



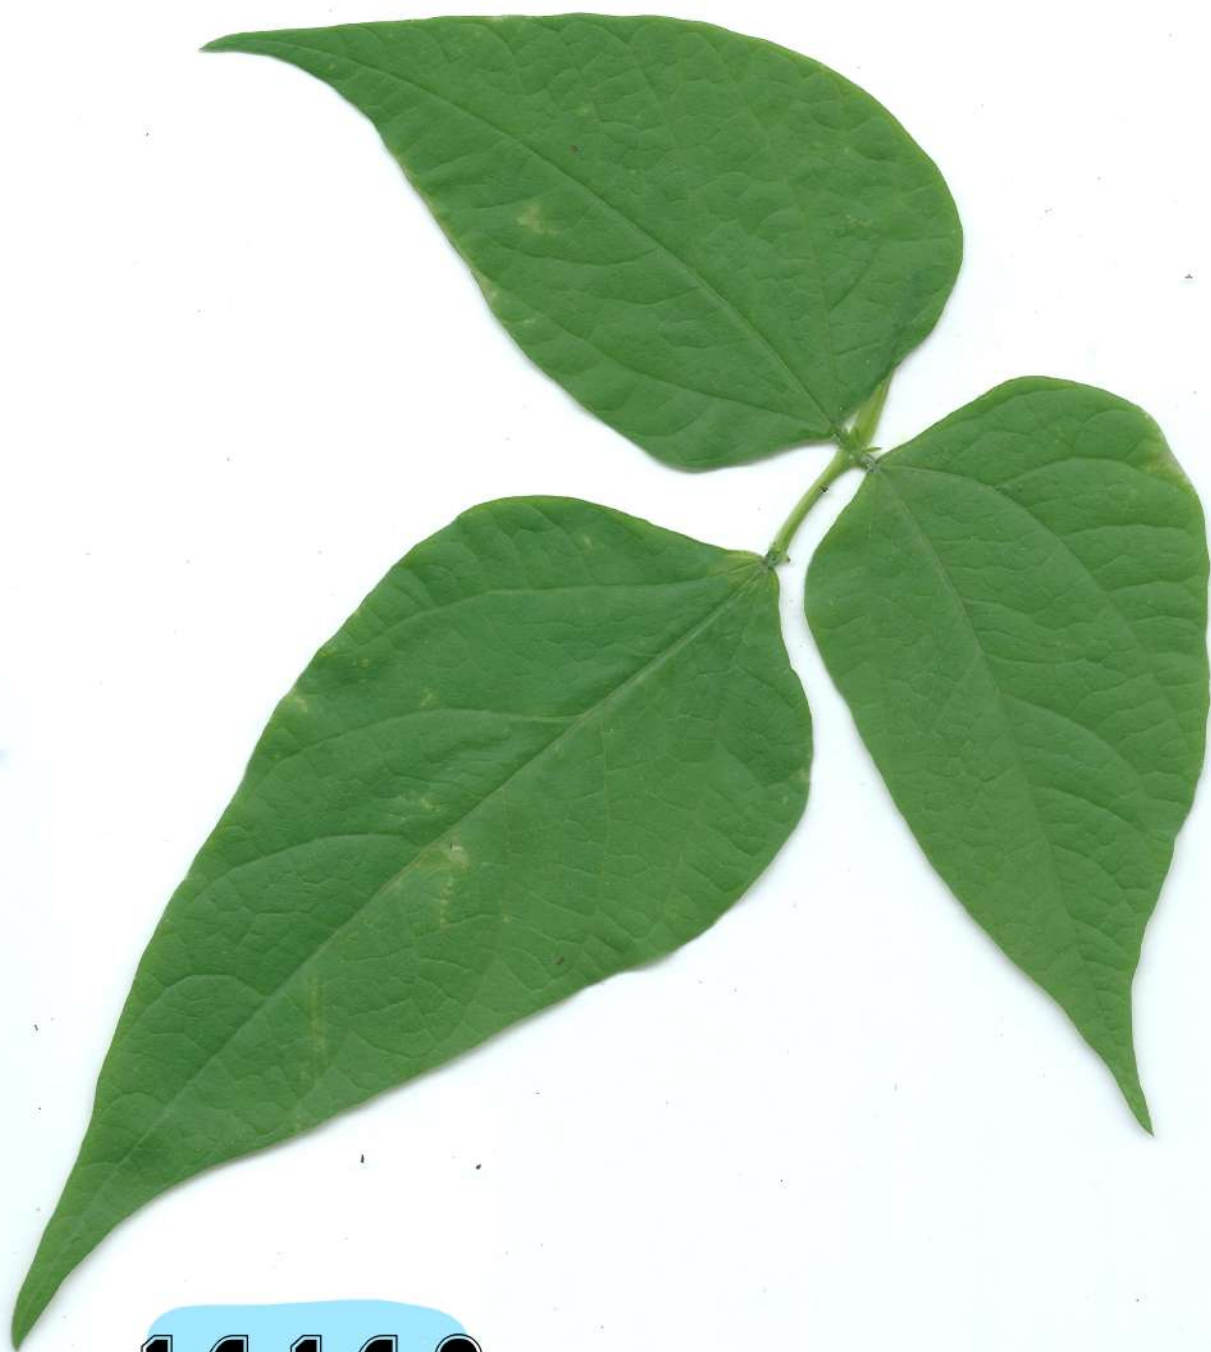

**14-14-3**

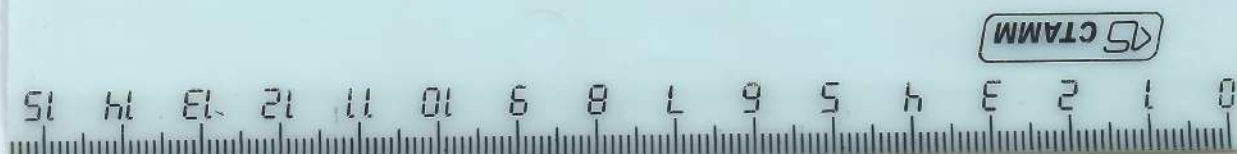

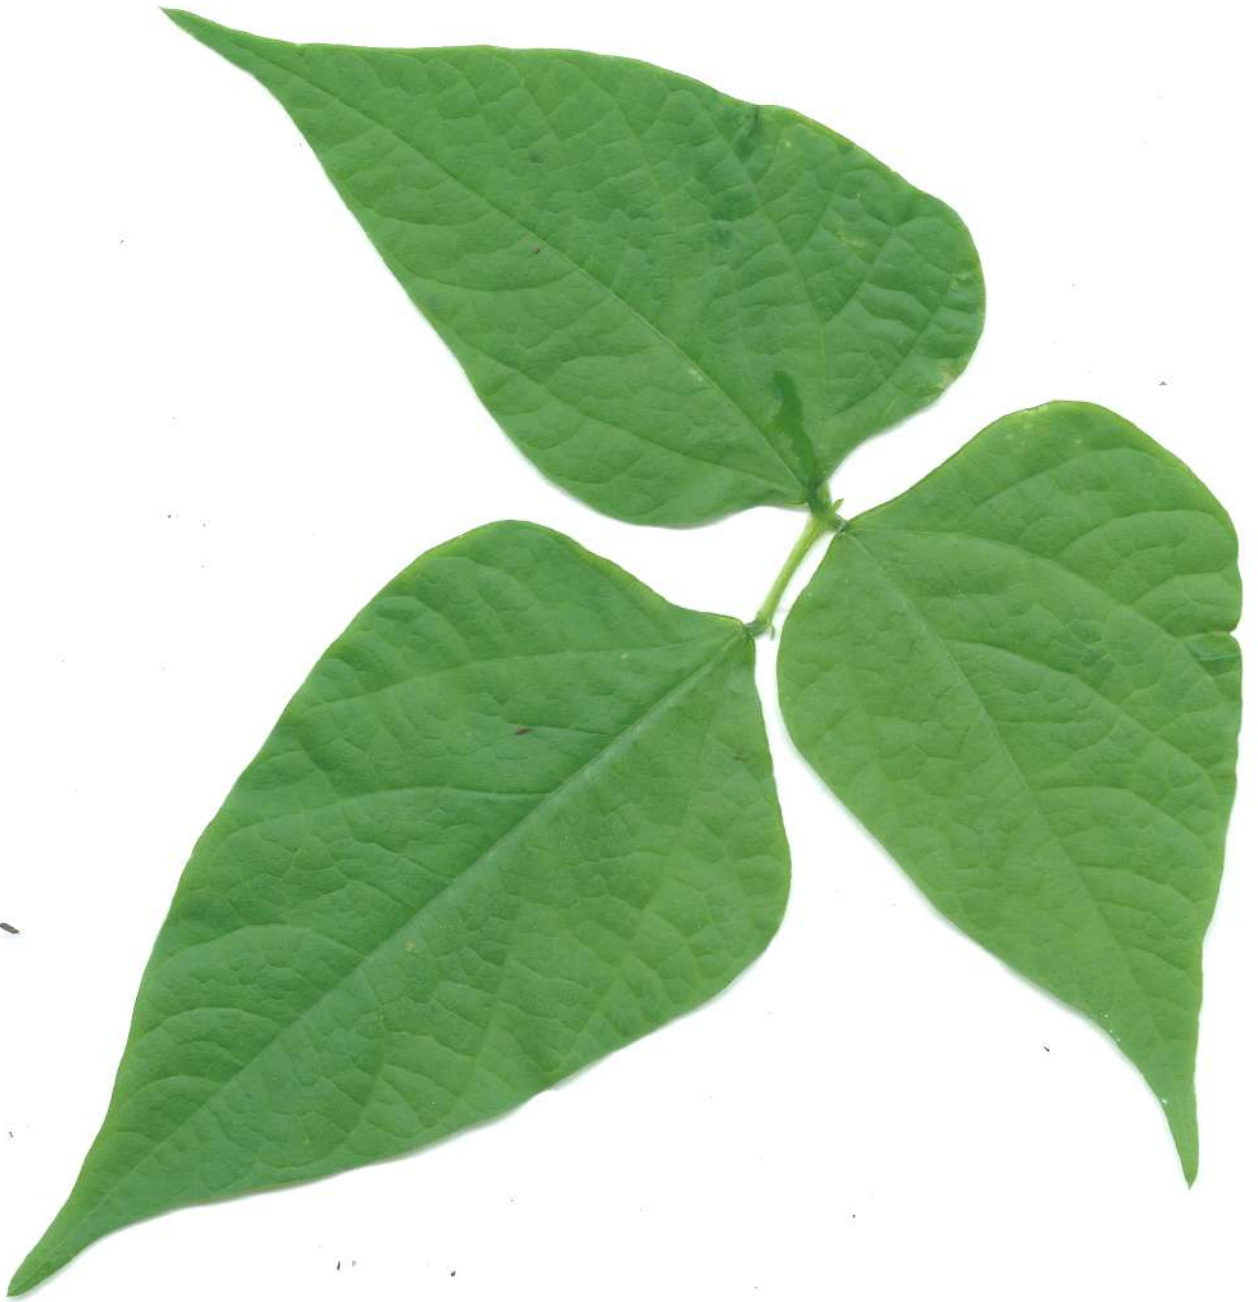

**14-14-2**

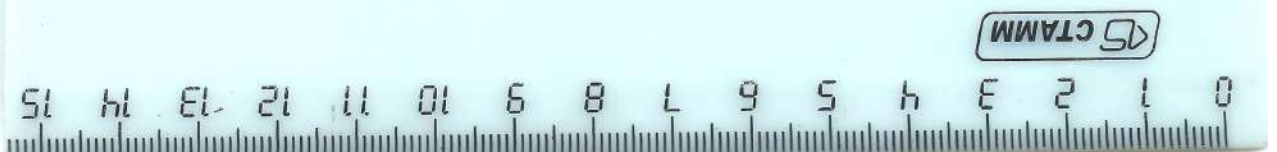

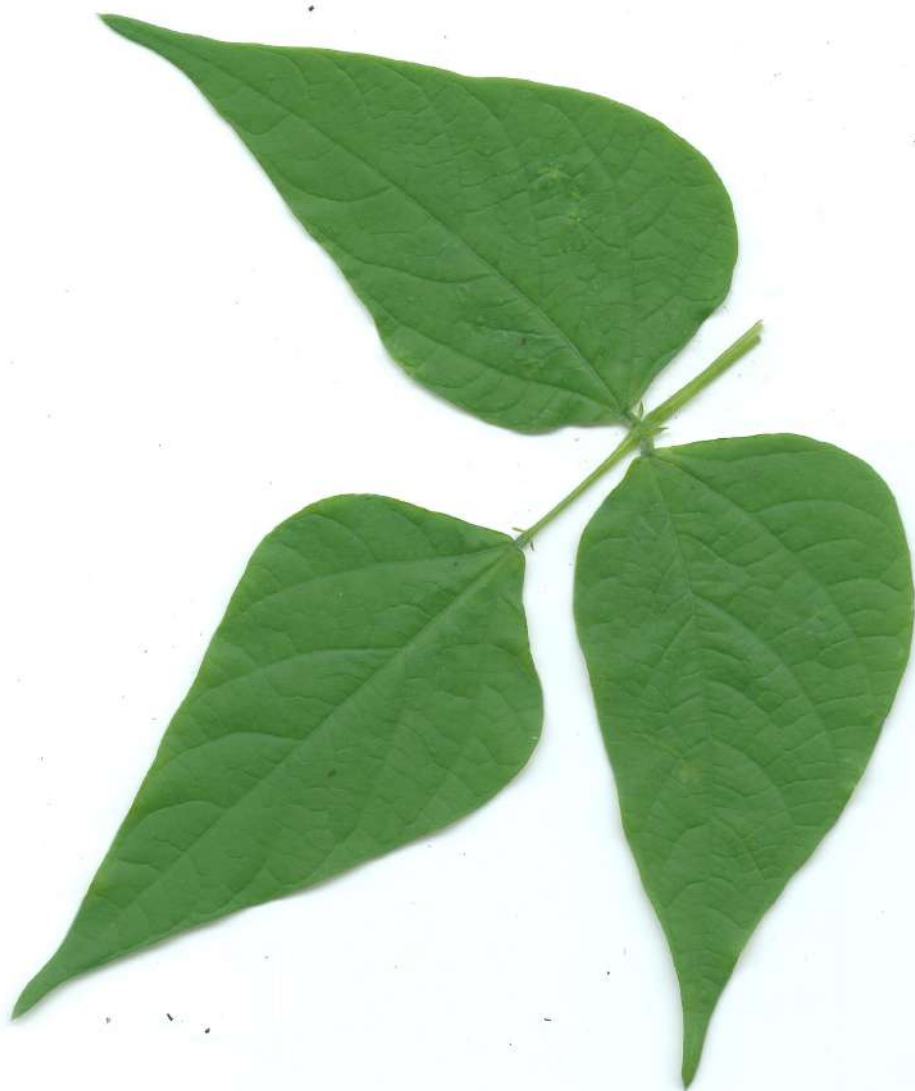

**14-14-1**

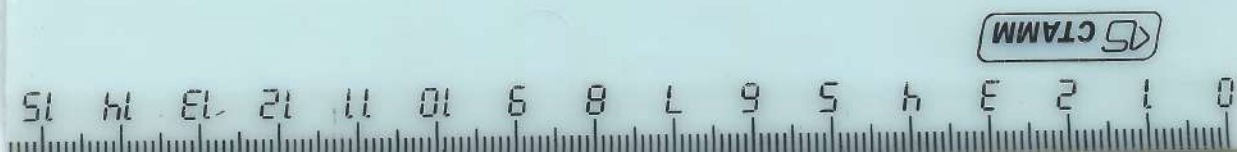

Supplement: s1 [file s1]
